# Supplementary material for: A Novel Prognostic Ferroptosis-Related Long Noncoding RNA Signature in Clear Cell Renal Cell Carcinoma
Source: Hindawi journal article supplement (doi:10.1155/2022/6304824), 2022-02-22
Supplement: f1 [file 6304824.f1.zip]

Table S1 259 ferroptosis-related genes in FerrDb

**Driver**

| Symbol  | Name                                                                   | HGNC_ID    |
|---------|------------------------------------------------------------------------|------------|
| RPL8    | Ribosomal protein L8                                                   | HGNC:10368 |
| IREB2   | Iron response element binding protein 2                                | HGNC:6115  |
| ATP5MC3 | ATP synthase membrane subunit c locus 3                                | HGNC:843   |
| CS      | Citrate synthase                                                       | HGNC:2422  |
| EMC2    | ER membrane protein complex subunit 2                                  | HGNC:28963 |
| ACSF2   | Acyl-CoA synthetase family member 2                                    | HGNC:26101 |
| NOX1    | Nicotinamide adenine dinucleotide phosphate (NADPH) oxidase (NOX) 1    | HGNC:7889  |
| CYBB    | Cytochrome b-245 beta chain                                            | HGNC:2578  |
| NOX3    | Nicotinamide adenine dinucleotide phosphate (NADPH) oxidase (NOX) 3    | HGNC:7890  |
| NOX4    | Nicotinamide adenine dinucleotide phosphate (NADPH) oxidase (NOX) 4    | HGNC:7891  |
| NOX5    | Nicotinamide adenine dinucleotide phosphate (NADPH) oxidase (NOX) 5    | HGNC:14874 |
| DUOX1   | Dual oxidase 1                                                         | HGNC:3062  |
| DUOX2   | Dual oxidase 2                                                         | HGNC:13273 |
| G6PD    | Glucose-6-phosphate dehydrogenase                                      | HGNC:4057  |
| PGD     | Phosphoglycerate dehydrogenase                                         | HGNC:8891  |
| VDAC2   | Voltage-dependent anion channels 2                                     | HGNC:12672 |
| PIK3CA  | Phosphatidylinositol-4,5-bisphosphate 3-kinase catalytic subunit alpha | HGNC:8975  |
| FLT3    | Fms related tyrosine kinase 3                                          | HGNC:3765  |
| SCP2    | Sterol carrier protein 2                                               | HGNC:10606 |
| TP53    | Tumor protein p53                                                      | HGNC:11998 |
| ACSL4   | Acyl-CoA synthetase long chain family member 4                         | HGNC:3571  |
| LPCAT3  | Lysophosphatidylcholine acyltransferase 3                              | HGNC:30244 |
| NRAS    | NRAS proto-oncogene, GTPase                                            | HGNC:7989  |
| KRAS    | KRAS proto-oncogene, GTPase                                            | HGNC:6407  |
| HRAS    | HRas proto-oncogene, GTPase                                            | HGNC:5173  |
| TF      | Transferrin                                                            | HGNC:11740 |
| TFRC    | Transferrin receptor                                                   | HGNC:11763 |
| TFR2    | Transferrin receptor 2                                                 | HGNC:11762 |
| SLC38A1 | Solute carrier family 38 member 1                                      | HGNC:13447 |
| SLC1A5  | Solute carrier family 1 member 5                                       | HGNC:10943 |
| GLS2    | Glutaminase 2                                                          | HGNC:29570 |
| GOT1    | Glutamic-oxaloacetic transaminase 1                                    | HGNC:4432  |
| CARS1   | Cysteinyl-tRNA synthetase 1                                            | HGNC:1493  |
| TP53    | Tumor protein p53                                                      | HGNC:11998 |
| ALOX5   | Arachidonate 5-lipoxygenase                                            | HGNC:435   |

|           |                                                      |            |
|-----------|------------------------------------------------------|------------|
| KEAP1     | Kelch like ECH associated protein 1                  | HGNC:23177 |
| HMOX1     | Heme oxygenase 1                                     | HGNC:5013  |
| TP53      | Tumor protein p53                                    | HGNC:11998 |
| TP53      | Tumor protein p53                                    | HGNC:11998 |
| GLS2      | Glutaminase 2                                        | HGNC:29570 |
| ATG5      | Autophagy related 5                                  | HGNC:589   |
| ATG7      | Autophagy related 7                                  | HGNC:16935 |
| NCOA4     | Nuclear receptor coactivator 4                       | HGNC:7671  |
| TF        | Transferrin                                          | HGNC:11740 |
| ALOX5     | Arachidonate 5-lipoxygenase                          | HGNC:435   |
| ALOX12    | Arachidonate 12-lipoxygenase, 12S type               | HGNC:429   |
| ALOX12B   | Arachidonate 12-lipoxygenase, 12R type               | HGNC:430   |
| ALOX15    | Arachidonate 15-lipoxygenase                         | HGNC:433   |
| ALOX15B   | Arachidonate 15-lipoxygenase type B                  | HGNC:434   |
| ALOXE3    | Arachidonate lipoxygenase 3                          | HGNC:13743 |
| PHKG2     | Phosphorylase kinase catalytic subunit gamma 2       | HGNC:8931  |
| TFRC      | Transferrin receptor                                 | HGNC:11763 |
| ACO1      | Aconitase 1                                          | HGNC:117   |
| IREB2     | iron responsive element binding protein 2            | HGNC:6115  |
| SLC38A1   | Solute carrier family 38 member 1                    | HGNC:13447 |
| GLS2      | Glutaminase 2                                        | HGNC:29570 |
| G6PDX     | _NA_                                                 | _NA_       |
| ULK1      | Unc-51 like autophagy activating kinase 1            | HGNC:12558 |
| ATG3      | Autophagy related 3                                  | HGNC:20962 |
| ATG4D     | Autophagy related 4D cysteine peptidase              | HGNC:20789 |
| ATG5      | Autophagy related 5                                  | HGNC:589   |
| BECN1     | Beclin 1                                             | HGNC:1034  |
| MAP1LC3A  | Microtubule associated protein 1 light chain 3 alpha | HGNC:6838  |
| GABARAPL2 | GABA type A receptor associated protein like 2       | HGNC:13291 |
| GABARAPL1 | GABA type A receptor associated protein like 1       | HGNC:4068  |
| ATG16L1   | Autophagy related 16 like 1                          | HGNC:21498 |
| WIPI1     | WD repeat domain, phosphoinositide interacting 1     | HGNC:25471 |
| WIPI2     | WD repeat domain, phosphoinositide interacting 2     | HGNC:32225 |
| SNX4      | Sorting nexin 4                                      | HGNC:11175 |
| ATG13     | Autophagy related 13                                 | HGNC:29091 |
| ULK2      | Unc-51 like autophagy activating kinase 2            | HGNC:13480 |
| NCOA4     | Nuclear receptor coactivator 4                       | HGNC:7671  |
| ACSL4     | Acyl-CoA synthetase long chain family member 4       | HGNC:3571  |

|           |                                                            |            |
|-----------|------------------------------------------------------------|------------|
| TP53      | Tumor protein p53                                          | HGNC:11998 |
| SAT1      | Spermidine/spermine N1-acetyltransferase 1                 | HGNC:10540 |
| ALOX15    | Arachidonate 15-lipoxygenase                               | HGNC:433   |
| ACSL4     | Acyl-CoA synthetase long chain family member 4             | HGNC:3571  |
| LPCAT3    | Lysophosphatidylcholine acyltransferase 3                  | HGNC:30244 |
| ALOX15    | Arachidonate 15-lipoxygenase                               | HGNC:433   |
| ACSL4     | Acyl-CoA synthetase long chain family member 4             | HGNC:3571  |
| KEAP1     | Kelch like ECH associated protein 1                        | HGNC:23177 |
| EGFR      | Epidermal growth factor receptor                           | HGNC:3236  |
| NOX4      | NADPH oxidase 4                                            | HGNC:7891  |
| MAPK3     | Mitogen-activated protein kinase 3                         | HGNC:6877  |
| MAPK1     | Mitogen-activated protein kinase 1                         | HGNC:6871  |
| BID       | BH3 interacting domain death agonist                       | HGNC:1050  |
| ACSL4     | Acyl-CoA synthetase long chain family member 4             | HGNC:3571  |
| ZEB1      | Zinc finger E-box binding homeobox 1                       | HGNC:11642 |
| KEAP1     | Kelch like ECH associated protein 1                        | HGNC:23177 |
| DPP4      | Dipeptidyl peptidase 4                                     | HGNC:3009  |
| ALOX15    | Arachidonate 15-lipoxygenase                               | HGNC:433   |
| ALOX12    | Arachidonate 12-lipoxygenase, 12S type                     | HGNC:429   |
| CDKN2A    | Cyclin dependent kinase inhibitor 2A                       | HGNC:1787  |
| PEBP1     | Phosphatidylethanolamine binding protein 1                 | HGNC:8630  |
| SOCS1     | Suppressor of cytokine signaling 1                         | HGNC:19383 |
| CDO1      | Cysteine dioxygenase type 1                                | HGNC:1795  |
| MYB       | MYB proto-oncogene, transcription factor                   | HGNC:7545  |
| HMOX1     | Heme oxygenase 1                                           | HGNC:5013  |
| MAPK8     | Mitogen-activated protein kinase 8                         | HGNC:6881  |
| MAPK9     | Mitogen-activated protein kinase 9                         | HGNC:6886  |
| MAPK1     | Mitogen-activated protein kinase 1                         | HGNC:6871  |
| MAPK3     | Mitogen-activated protein kinase 3                         | HGNC:6877  |
| SLC1A5    | Solute carrier family 1 member 5                           | HGNC:10943 |
| CHAC1     | ChaC glutathione specific gamma-glutamylcyclotransferase 1 | HGNC:28680 |
| MAPK14    | Mitogen-activated protein kinase 14                        | HGNC:6876  |
| LINC00472 | Long intergenic non-protein coding RNA 472                 | HGNC:21380 |
| NOX4      | NADPH oxidase 4                                            | HGNC:7891  |
| GOT1      | Glutamic-oxaloacetic transaminase 1                        | HGNC:4432  |
| BECN1     | Beclin 1                                                   | HGNC:1034  |
| PRKAA2    | Protein kinase AMP-activated catalytic subunit alpha 2     | HGNC:9377  |
| PRKAA1    | Protein kinase AMP-activated catalytic subunit alpha 1     | HGNC:9376  |

|         |                                                  |            |
|---------|--------------------------------------------------|------------|
| ELAVL1  | ELAV like RNA binding protein 1                  | HGNC:3312  |
| BAP1    | BRCA1 associated protein 1                       | HGNC:950   |
| TP53    | Tumor protein p53                                | HGNC:11998 |
| ABCC1   | ATP binding cassette subfamily C member 1        | HGNC:51    |
| ACSL4   | Acyl-CoA synthetase long chain family member 4   | HGNC:3571  |
| MIR6852 | microRNA 6852                                    | HGNC:49993 |
| ACVR1B  | Activin A receptor type 1B                       | HGNC:172   |
| TGFBR1  | Transforming growth factor beta receptor 1       | HGNC:11772 |
| BAP1    | BRCA1 associated protein 1                       | HGNC:950   |
| EPAS1   | Endothelial PAS domain protein 1                 | HGNC:3374  |
| HILPDA  | Hypoxia inducible lipid droplet associated       | HGNC:28859 |
| HIF1A   | Hypoxia inducible factor 1 subunit alpha         | HGNC:4910  |
| ALOX12  | Arachidonate 12-lipoxygenase, 12S type           | HGNC:429   |
| ACSL4   | Acyl-CoA synthetase long chain family member 4   | HGNC:3571  |
| HMOX1   | Heme oxygenase 1                                 | HGNC:5013  |
| IFNG    | Interferon gamma                                 | HGNC:5438  |
| ANO6    | Anoctamin 6                                      | HGNC:25240 |
| LPIN1   | Lipin 1                                          | HGNC:13345 |
| HMGB1   | High mobility group box 1                        | HGNC:4983  |
| TNFAIP3 | TNF alpha induced protein 3                      | HGNC:11896 |
| TLR4    | Toll like receptor 4                             | HGNC:11850 |
| NOX4    | NADPH oxidase 4                                  | HGNC:7891  |
| ATF3    | Activating transcription factor 3                | HGNC:785   |
| ATM     | ATM serine/threonine kinase                      | HGNC:795   |
| YY1AP1  | YY1 associated protein 1                         | HGNC:30935 |
| EGLN2   | Egl-9 family hypoxia inducible factor 2          | HGNC:14660 |
| MIOX    | Myo-inositol oxygenase                           | HGNC:14522 |
| TAZ     | Tafazzin                                         | HGNC:11577 |
| MTDH    | Metadherin                                       | HGNC:29608 |
| IDH1    | Isocitrate dehydrogenase (NADP(+)) 1             | HGNC:5382  |
| SIRT1   | Sirtuin 1                                        | HGNC:14929 |
| TAZ     | Tafazzin                                         | HGNC:11577 |
| BECN1   | Beclin 1                                         | HGNC:1034  |
| FBXW7   | F-box and WD repeat domain containing 7          | HGNC:16712 |
| PANX1   | Pannexin 1                                       | HGNC:8599  |
| DNAJB6  | DnaJ heat shock protein family (Hsp40) member B6 | HGNC:14888 |
| BACH1   | BTB domain and CNC homolog 1                     | HGNC:935   |
| ACSL4   | Acyl-CoA synthetase long chain family member 4   | HGNC:3571  |

|                   |                                              |            |
|-------------------|----------------------------------------------|------------|
| LONP1             | Lon peptidase 1, mitochondrial               | HGNC:9479  |
| <b>Suppressor</b> |                                              |            |
| Symbol            | Name                                         | HGNC_ID    |
| SLC7A11           | Solute carrier family 7 member 11            | HGNC:11059 |
| GPX4              | Glutathione peroxidase 4                     | HGNC:4556  |
| AKR1C1            | Aldo-keto reductase family 1 member C1       | HGNC:384   |
| AKR1C2            | Aldo-keto reductase family 1 member C2       | HGNC:385   |
| AKR1C3            | Aldo-keto reductase family 1 member C3       | HGNC:386   |
| GPX4              | Glutathione peroxidase 4                     | HGNC:4556  |
| RB1               | RB transcriptional corepressor 1             | HGNC:9884  |
| HSPB1             | Heat shock protein family B (small) member 1 | HGNC:5246  |
| HSF1              | Heat shock transcription factor 1            | HGNC:5224  |
| SLC7A11           | Solute carrier family 7 member 11            | HGNC:11059 |
| GPX4              | Glutathione peroxidase 4                     | HGNC:4556  |
| GCLC              | Glutamate-cysteine ligase catalytic subunit  | HGNC:4311  |
| SLC7A11           | Solute carrier family 7 member 11            | HGNC:11059 |
| NFE2L2            | Nuclear factor, erythroid 2 like 2           | HGNC:7782  |
| SQSTM1            | Sequestosome 1                               | HGNC:11280 |
| NQO1              | NAD(P)H quinone dehydrogenase 1              | HGNC:2874  |
| HMOX1             | Heme oxygenase 1                             | HGNC:5013  |
| FTH1              | Ferritin heavy chain 1                       | HGNC:3976  |
| MUC1              | Mucin 1, cell surface associated             | HGNC:7508  |
| SLC3A2            | Solute carrier family 3 member 2             | HGNC:11026 |
| MT1G              | Metallothionein 1G                           | HGNC:7399  |
| NFE2L2            | Nuclear factor, erythroid 2 like 2           | HGNC:7782  |
| SLC40A1           | Solute carrier family 40 member 1            | HGNC:10909 |
| SLC7A11           | Solute carrier family 7 member 11            | HGNC:11059 |
| GPX4              | Glutathione peroxidase 4                     | HGNC:4556  |
| SLC7A11           | Solute carrier family 7 member 11            | HGNC:11059 |
| CISD1             | CDGSH iron sulfur domain 1                   | HGNC:30880 |
| SLC7A11           | Solute carrier family 7 member 11            | HGNC:11059 |
| FANCD2            | FA complementation group D2                  | HGNC:3585  |
| GPX4              | Glutathione peroxidase 4                     | HGNC:4556  |
| NFE2L2            | Nuclear factor, erythroid 2 like 2           | HGNC:7782  |
| FTMT              | Ferritin mitochondrial                       | HGNC:17345 |
| HSPA5             | Heat shock protein family A (Hsp70) member 5 | HGNC:5238  |
| ATF4              | Activating transcription factor 4            | HGNC:786   |
| SLC7A11           | Solute carrier family 7 member 11            | HGNC:11059 |

|         |                                                    |            |
|---------|----------------------------------------------------|------------|
| GPX4    | Glutathione peroxidase 4                           | HGNC:4556  |
| GPX4    | Glutathione peroxidase 4                           | HGNC:4556  |
| HMOX1   | Heme oxygenase 1                                   | HGNC:5013  |
| ATF4    | Activating transcription factor 4                  | HGNC:786   |
| NFE2L2  | Nuclear factor, erythroid 2 like 2                 | HGNC:7782  |
| TP53    | Tumor protein p53                                  | HGNC:11998 |
| SLC7A11 | Solute carrier family 7 member 11                  | HGNC:11059 |
| HELLS   | Helicase, lymphoid specific                        | HGNC:4861  |
| SCD     | Stearoyl-CoA desaturase                            | HGNC:10571 |
| FADS2   | Fatty acid desaturase 2                            | HGNC:3575  |
| SRC     | SRC proto-oncogene, non-receptor tyrosine kinase   | HGNC:11283 |
| STAT3   | Signal transducer and activator of transcription 3 | HGNC:11364 |
| NFE2L2  | Nuclear factor, erythroid 2 like 2                 | HGNC:7782  |
| PML     | Promyelocytic leukemia                             | HGNC:9113  |
| MTOR    | Mechanistic target of rapamycin kinase             | HGNC:3942  |
| NFS1    | NFS1 cysteine desulfurase                          | HGNC:15910 |
| TP63    | Tumor protein p63                                  | HGNC:15979 |
| SLC7A11 | Solute carrier family 7 member 11                  | HGNC:11059 |
| TP53    | Tumor protein p53                                  | HGNC:11998 |
| CDKN1A  | Cyclin dependent kinase inhibitor 1A               | HGNC:1784  |
| MIR137  | microRNA 137                                       | HGNC:31523 |
| SLC40A1 | Solute carrier family 40 member 1                  | HGNC:10909 |
| GPX4    | Glutathione peroxidase 4                           | HGNC:4556  |
| GPX4    | Glutathione peroxidase 4                           | HGNC:4556  |
| ENPP2   | Ectonucleotide pyrophosphatase/phosphodiesterase 2 | HGNC:3357  |
| VDAC2   | Voltage dependent anion channel 2                  | HGNC:12672 |
| FH      | Fumarate hydratase                                 | HGNC:3700  |
| CISD2   | CDGSH iron sulfur domain 2                         | HGNC:24212 |
| SLC40A1 | Solute carrier family 40 member 1                  | HGNC:10909 |
| MIR9-1  | microRNA 9-1                                       | HGNC:31641 |
| MIR9-2  | microRNA 9-2                                       | HGNC:31642 |
| MIR9-3  | microRNA 9-3                                       | HGNC:31646 |
| CBS     | Cystathionine beta-synthase                        | HGNC:1550  |
| NFE2L2  | Nuclear factor, erythroid 2 like 2                 | HGNC:7782  |
| SQSTM1  | Sequestosome 1                                     | HGNC:11280 |
| GPX4    | Glutathione peroxidase 4                           | HGNC:4556  |
| ISCU    | Iron-sulfur cluster assembly enzyme                | HGNC:29882 |
| FTH1    | Ferritin heavy chain 1                             | HGNC:3976  |

|           |                                                       |            |
|-----------|-------------------------------------------------------|------------|
| ACSL3     | Acyl-CoA synthetase long chain family member 3        | HGNC:3570  |
| OTUB1     | OTU deubiquitinase, ubiquitin aldehyde binding 1      | HGNC:23077 |
| CD44      | CD44 molecule (Indian blood group)                    | HGNC:1681  |
| LINC00336 | Long intergenic non-protein coding RNA 336            | HGNC:33813 |
| STAT3     | Signal transducer and activator of transcription 3    | HGNC:11364 |
| BRD4      | Bromodomain containing 4                              | HGNC:13575 |
| PRDX6     | Peroxiredoxin 6                                       | HGNC:16753 |
| MIR17     | microRNA 17                                           | HGNC:31547 |
| SCD       | Stearoyl-CoA desaturase                               | HGNC:10571 |
| SESN2     | Sestrin 2                                             | HGNC:20746 |
| NF2       | Neurofibromin 2                                       | HGNC:7773  |
| ARNTL     | Aryl hydrocarbon receptor nuclear translocator like   | HGNC:701   |
| HIF1A     | Hypoxia inducible factor 1 subunit alpha              | HGNC:4910  |
| JUN       | Jun proto-oncogene, AP-1 transcription factor subunit | HGNC:6204  |
| CA9       | Carbonic anhydrase 9                                  | HGNC:1383  |
| HSPA5     | Heat shock protein family A (Hsp70) member 5          | HGNC:5238  |
| TMBIM4    | Transmembrane BAX inhibitor motif containing 4        | HGNC:24257 |
| HSPA5     | Heat shock protein family A (Hsp70) member 5          | HGNC:5238  |
| PLIN2     | Perilipin 2                                           | HGNC:248   |
| MIR212    | microRNA 212                                          | HGNC:31589 |
| Fer1HCH   | Ferritin 1 Heavy Chain Homolog                        | _NA_       |
| AIFM2     | Apoptosis inducing factor mitochondria associated 2   | HGNC:21411 |
| AIFM2     | Apoptosis inducing factor mitochondria associated 2   | HGNC:21411 |
| LAMP2     | Lysosomal associated membrane protein 2               | HGNC:6501  |
| ZFP36     | ZFP36 ring finger protein                             | HGNC:12862 |
| GPX4      | Glutathione peroxidase 4                              | HGNC:4556  |
| PROM2     | Prominin 2                                            | HGNC:20685 |
| CHMP5     | Charged multivesicular body protein 5                 | HGNC:26942 |
| CHMP6     | Charged multivesicular body protein 6                 | HGNC:25675 |
| AKR1C1    | Aldo-keto reductase family 1 member C1                | HGNC:384   |
| AKR1C2    | Aldo-keto reductase family 1 member C2                | HGNC:385   |
| AKR1C3    | Aldo-keto reductase family 1 member C3                | HGNC:386   |
| CBS       | Cystathionine beta-synthase                           | HGNC:1550  |
| NFE2L2    | Nuclear factor, erythroid 2 like 2                    | HGNC:7782  |
| CAV1      | Caveolin 1                                            | HGNC:1527  |
| GCH1      | GTP cyclohydrolase 1                                  | HGNC:4193  |

### Marker

| Symbol | Name | HGNC_ID |
|--------|------|---------|
|--------|------|---------|

|          |                                                                |            |
|----------|----------------------------------------------------------------|------------|
| PTGS2    | Prostaglandin-endoperoxide synthase 2                          | HGNC:9605  |
| DUSP1    | Dual specificity phosphatase 1                                 | HGNC:3064  |
| NOS2     | Nitric oxide synthase 2                                        | HGNC:7873  |
| NCF2     | Neutrophil cytosolic factor 2                                  | HGNC:7661  |
| MT3      | Metallothionein 3                                              | HGNC:7408  |
| UBC      | Ubiquitin C                                                    | HGNC:12468 |
| ALB      | Albumin                                                        | HGNC:399   |
| TXNRD1   | Thioredoxin reductase 1                                        | HGNC:12437 |
| SRXN1    | Sulfiredoxin 1                                                 | HGNC:16132 |
| GPX2     | Glutathione peroxidase 2                                       | HGNC:4554  |
| BNIP3    | BCL2 interacting protein 3                                     | HGNC:1084  |
| OXS1     | Oxidative stress responsive kinase 1                           | HGNC:8508  |
| SELENOS  | Selenoprotein S                                                | HGNC:30396 |
| ANGPTL7  | Angiopoietin like 7                                            | HGNC:24078 |
| CHAC1    | ChaC glutathione specific gamma-glutamylcyclotransferase 1     | HGNC:28680 |
| SLC7A11  | Solute carrier family 7 member 11                              | HGNC:11059 |
| DDIT4    | DNA damage inducible transcript 4                              | HGNC:24944 |
| LOC28456 | _NA_                                                           | _NA_       |
| ASNS     | Asparagine synthetase (glutamine-hydrolyzing)                  | HGNC:753   |
| TSC22D3  | TSC22 domain family member 3                                   | HGNC:3051  |
| DDIT3    | DNA damage inducible transcript 3                              | HGNC:2726  |
| JDP2     | Jun dimerization protein 2                                     | HGNC:17546 |
| SESN2    | Sestrin 2                                                      | HGNC:20746 |
| SLC1A4   | Solute carrier family 1 member 4                               | HGNC:10942 |
| PCK2     | Phosphoenolpyruvate carboxykinase 2, mitochondrial             | HGNC:8725  |
| TXNIP    | Thioredoxin interacting protein                                | HGNC:16952 |
| VLDLR    | Very low density lipoprotein receptor                          | HGNC:12698 |
| GPT2     | Glutamic--pyruvic transaminase 2                               | HGNC:18062 |
| PSAT1    | Phosphoserine aminotransferase 1                               | HGNC:19129 |
| LURAP1L  | Leucine rich adaptor protein 1 like                            | HGNC:31452 |
| SLC7A5   | Solute carrier family 7 member 5                               | HGNC:11063 |
| HERPUD1  | Homocysteine inducible ER protein with ubiquitin like domain 1 | HGNC:13744 |
| XBP1     | X-box binding protein 1                                        | HGNC:12801 |
| ATF3     | Activating transcription factor 3                              | HGNC:785   |
| SLC3A2   | Solute carrier family 3 member 2                               | HGNC:11026 |
| CBS      | Cystathionine beta-synthase                                    | HGNC:1550  |
| ATF4     | Activating transcription factor 4                              | HGNC:786   |
| ZNF419   | Zinc finger protein 419                                        | HGNC:20648 |



|                       |                                                            |                    |
|-----------------------|------------------------------------------------------------|--------------------|
| KLHL24                | Kelch like family member 24                                | HGNC:25947         |
| TRIB3                 | Tribbles pseudokinase 3                                    | HGNC:16228         |
| ZFP69B                | ZFP69 zinc finger protein B                                | HGNC:28053         |
| ATP6V1G2              | ATPase H <sup>+</sup> transporting V1 subunit G2           | HGNC:862           |
| VEGFA                 | Vascular endothelial growth factor A                       | HGNC:12680         |
| GDF15                 | Growth differentiation factor 15                           | HGNC:30142         |
| TUBE1                 | Tubulin epsilon 1                                          | HGNC:20775         |
| ARRDC3                | Arrestin domain containing 3                               | HGNC:29263         |
| CEBPG                 | CCAAT enhancer binding protein gamma                       | HGNC:1837          |
| SNORA16               | Small nucleolar RNA, H/ACA box 16A                         | HGNC:32605         |
| RGS4                  | Regulator of G protein signaling 4                         | HGNC:10000         |
| BLOC1S5-<br>LOC390701 | BLOC1S5-TXNDC5 readthrough (NMD candidate)<br>_NA_         | HGNC:42001<br>_NA_ |
| EIF2S1                | Eukaryotic translation initiation factor 2 subunit 1       | HGNC:3265          |
| KIM-1                 | Kidney injury molecule-1                                   | _NA_               |
| IL6                   | Interleukin 6                                              | HGNC:6018          |
| CXCL2                 | C-X-C motif chemokine ligand 2                             | HGNC:4603          |
| RELA                  | RELA proto-oncogene, NF-kB subunit                         | HGNC:9955          |
| HSD17B11              | Hydroxysteroid 17-beta dehydrogenase 11                    | HGNC:22960         |
| AGPAT3                | 1-acylglycerol-3-phosphate O-acyltransferase 3             | HGNC:326           |
| SETD1B                | SET domain containing 1B, histone lysine methyltransferase | HGNC:29187         |
| HMOX1                 | Heme oxygenase 1                                           | HGNC:5013          |
| TF                    | Transferrin                                                | HGNC:11740         |
| FTL                   | Ferritin light chain                                       | HGNC:3999          |
| RPL8                  | Ribosomal protein L8                                       | HGNC:10368         |
| ATP5MC3               | ATP synthase membrane subunit c locus 3                    | HGNC:843           |
| TFRC                  | Transferrin receptor                                       | HGNC:11763         |
| MAFG                  | MAF bZIP transcription factor G                            | HGNC:6781          |
| IL33                  | Interleukin 33                                             | HGNC:16028         |
| FTH1                  | Ferritin heavy chain 1                                     | HGNC:3976          |
| SLC40A1               | Solute carrier family 40 member 1                          | HGNC:10909         |
| TF                    | Transferrin                                                | HGNC:11740         |
| TFRC                  | Transferrin receptor                                       | HGNC:11763         |
| FTH1                  | Ferritin heavy chain 1                                     | HGNC:3976          |
| GPX4                  | Glutathione peroxidase 4                                   | HGNC:4556          |
| HAMP                  | Hepcidin antimicrobial peptide                             | HGNC:15598         |
| HSPB1                 | Heat shock protein family B (small) member 1               | HGNC:5246          |
| NFE2L2                | Nuclear factor, erythroid 2 like 2                         | HGNC:7782          |

|         |                                                           |            |
|---------|-----------------------------------------------------------|------------|
| STEAP3  | STEAP3 metalloredutase                                    | HGNC:24592 |
| DRD5    | Dopamine receptor D5                                      | HGNC:3026  |
| GPX4    | Glutathione peroxidase 4                                  | HGNC:4556  |
| DRD4    | Dopamine receptor D4                                      | HGNC:3025  |
| MAP3K5  | Mitogen-activated protein kinase kinase kinase 5          | HGNC:6857  |
| MAPK14  | Mitogen-activated protein kinase 14                       | HGNC:6876  |
| SLC2A1  | Solute carrier family 2 member 1                          | HGNC:11005 |
| SLC2A3  | Solute carrier family 2 member 3                          | HGNC:11007 |
| SLC2A6  | Solute carrier family 2 member 6                          | HGNC:11011 |
| SLC2A8  | Solute carrier family 2 member 8                          | HGNC:13812 |
| SLC2A12 | Solute carrier family 2 member 12                         | HGNC:18067 |
| GLUT13  | _NA_                                                      | _NA_       |
| SLC2A14 | Solute carrier family 2 member 14                         | HGNC:18301 |
| EIF2AK4 | Eukaryotic translation initiation factor 2 alpha kinase 4 | HGNC:19687 |
| EIF2S1  | Eukaryotic translation initiation factor 2 subunit alpha  | HGNC:3265  |
| ATF4    | Activating transcription factor 4                         | HGNC:786   |
| ALOX5   | Arachidonate 5-lipoxygenase                               | HGNC:435   |
| ALOX12  | Arachidonate 12-lipoxygenase, 12S type                    | HGNC:429   |
| ALOX15  | Arachidonate 15-lipoxygenase                              | HGNC:433   |
| ALOX5   | Arachidonate 5-lipoxygenase                               | HGNC:435   |
| ACSF2   | Acyl-CoA synthetase family member 2                       | HGNC:26101 |
| IREB2   | Iron responsive element binding protein 2                 | HGNC:6115  |
| GPX4    | Glutathione peroxidase 4                                  | HGNC:4556  |
| HMGB1   | High mobility group box 1                                 | HGNC:4983  |
| HMOX1   | Heme oxygenase 1                                          | HGNC:5013  |
| NFE2L2  | Nuclear factor, erythroid 2 like 2                        | HGNC:7782  |
| ELAVL1  | ELAV like RNA binding protein 1                           | HGNC:3312  |
| SLC3A2  | Solute carrier family 3 member 2                          | HGNC:11026 |
| SLC7A11 | Solute carrier family 7 member 11                         | HGNC:11059 |
| TFAP2C  | Transcription factor AP-2 gamma                           | HGNC:11744 |
| SP1     | Sp1 transcription factor                                  | HGNC:11205 |
| HBA1    | Hemoglobin subunit alpha 1                                | HGNC:4823  |
| NNMT    | Nicotinamide N-methyltransferase                          | HGNC:7861  |
| PLIN4   | Perilipin 4                                               | HGNC:29393 |
| HIC1    | HIC ZBTB transcriptional repressor 1                      | HGNC:4909  |
| STMN1   | Stathmin 1                                                | HGNC:6510  |
| RRM2    | Ribonucleotide reductase regulatory subunit M2            | HGNC:10452 |
| CAPG    | Capping actin protein, gelsolin like                      | HGNC:1474  |

|         |                                                                   |            |
|---------|-------------------------------------------------------------------|------------|
| HNF4A   | Hepatocyte nuclear factor 4 alpha                                 | HGNC:5024  |
| NGB     | Neuroglobin                                                       | HGNC:14077 |
| YWHAE   | Tyrosine 3-monooxygenase/tryptophan 5-monooxygenase activation pr | HGNC:12851 |
| GABPB1  | GA binding protein transcription factor subunit beta 1            | HGNC:4074  |
| AURKA   | Aurora kinase A                                                   | HGNC:11393 |
| MIR4715 | microRNA 4715                                                     | HGNC:41666 |
| RIPK1   | Receptor interacting serine/threonine kinase 1                    | HGNC:10019 |
| PRDX1   | Peroxiredoxin 1                                                   | HGNC:9352  |
| MIR30B  | microRNA 30b                                                      | HGNC:31625 |

**Table S2 76 Ferroptosis-related genes in TCGA-KIRC**

| gene           | conMean     | treatMean   | logFC        | pValue      | fd          |
|----------------|-------------|-------------|--------------|-------------|-------------|
| SLC7A11        | 0.114650648 | 0.388249872 | 1.759740939  | 1.52E-25    | 6.86E-25    |
| AKR1C1         | 8.402919547 | 3.821344945 | -1.136810178 | 1.97E-08    | 3.31E-08    |
| AKR1C2         | 3.012281661 | 1.251670804 | -1.267001499 | 0.000733587 | 0.000969684 |
| HMOX1          | 24.87096883 | 128.4014111 | 2.368126444  | 1.97E-32    | 1.89E-31    |
| MUC1           | 62.08031639 | 20.48334161 | -1.599684817 | 2.05E-31    | 1.74E-30    |
| MT1G           | 532.7081502 | 24.31696708 | -4.453310148 | 1.42E-28    | 7.77E-28    |
| SCD            | 11.16170549 | 90.01779866 | 3.0116528    | 3.02E-35    | 3.86E-34    |
| PML            | 4.127491986 | 9.57467159  | 1.21395759   | 3.33E-36    | 5.90E-35    |
| MTOR           | 9.448338153 | 4.229550758 | -1.159556164 | 8.30E-37    | 1.88E-35    |
| TP63           | 0.25876445  | 0.115187583 | -1.167654226 | 1.94E-06    | 2.92E-06    |
| ENPP2          | 23.147985   | 70.05449092 | 1.597590925  | 4.69E-11    | 9.23E-11    |
| CBS            | 0.055601049 | 0.026033986 | -1.094715851 | 3.51E-15    | 8.16E-15    |
| CD44           | 7.405462972 | 19.1090518  | 1.367594356  | 2.19E-18    | 6.08E-18    |
| HIF1A          | 77.61493319 | 33.72896895 | -1.202346037 | 6.60E-24    | 2.37E-23    |
| CA9            | 2.243136175 | 136.0519951 | 5.922497097  | 5.35E-38    | 1.76E-36    |
| PLIN2          | 26.37278014 | 208.070087  | 2.979948003  | 2.63E-31    | 2.01E-30    |
| PROM2          | 28.94209932 | 2.420898455 | -3.5795551   | 1.99E-39    | 1.52E-37    |
| CAV1           | 14.6949154  | 67.82712973 | 2.206545389  | 5.37E-35    | 6.50E-34    |
| GCH1           | 8.123429958 | 3.89354356  | -1.061005239 | 4.83E-20    | 1.48E-19    |
| PTGS2          | 5.727144401 | 2.5058454   | -1.19251857  | 2.04E-14    | 4.65E-14    |
| NOS2           | 0.59413861  | 1.204800056 | 1.019922293  | 0.002423956 | 0.002997365 |
| NCF2           | 2.062473179 | 6.994414958 | 1.761828031  | 8.44E-28    | 4.13E-27    |
| MT3            | 0.906485847 | 8.786108145 | 3.276867857  | 1.05E-05    | 1.54E-05    |
| ALB            | 54.80645898 | 21.52170558 | -1.348553511 | 5.03E-16    | 1.23E-15    |
| GPX2           | 1.981453477 | 0.833502518 | -1.249300632 | 4.76E-28    | 2.43E-27    |
| BNIP3          | 18.27417681 | 54.27520146 | 1.570486757  | 5.11E-30    | 3.36E-29    |
| ANGPTL7        | 0.444157062 | 0.212461096 | -1.063871234 | 2.38E-13    | 5.32E-13    |
| CHAC1          | 4.404742008 | 1.083240905 | -2.023703397 | 8.91E-28    | 4.27E-27    |
| DDIT4          | 32.32598861 | 145.0282952 | 2.165568002  | 2.24E-31    | 1.84E-30    |
| TSC22D3        | 35.17360778 | 78.12438941 | 1.151279689  | 2.71E-13    | 5.99E-13    |
| SLC1A4         | 1.440338522 | 5.588999879 | 1.956182216  | 2.03E-38    | 9.33E-37    |
| PCK2           | 50.91182556 | 10.95643502 | -2.216222344 | 1.11E-09    | 2.09E-09    |
| GPT2           | 7.45080825  | 3.420571386 | -1.123159596 | 2.93E-18    | 8.02E-18    |
| PSAT1          | 44.95856672 | 7.969221281 | -2.496085381 | 4.15E-24    | 1.54E-23    |
| LURAP1L        | 3.888376556 | 8.004429092 | 1.041630569  | 1.49E-16    | 3.90E-16    |
| ATF3           | 46.77667497 | 20.46374967 | -1.192718793 | 1.17E-09    | 2.17E-09    |
| TRIB3          | 2.151184735 | 18.04057482 | 3.06804198   | 9.85E-36    | 1.51E-34    |
| ATP6V1G2       | 0.972420825 | 0.464731309 | -1.065183948 | 1.96E-25    | 8.68E-25    |
| VEGFA          | 10.79031619 | 125.7155178 | 3.542353694  | 2.71E-37    | 7.66E-36    |
| GDF15          | 79.55718229 | 34.44815336 | -1.207565533 | 1.94E-16    | 4.90E-16    |
| BLOC1S5-TXNDC5 | 0.729780425 | 0.198290467 | -1.879847132 | 2.11E-15    | 4.96E-15    |
| CXCL2          | 2.548180188 | 7.809354085 | 1.61573593   | 8.04E-08    | 1.32E-07    |
| TF             | 0.247983323 | 4.357376627 | 4.135144811  | 1.88E-06    | 2.84E-06    |
| HAMP           | 0.042262231 | 0.565979605 | 3.74330925   | 2.84E-29    | 1.68E-28    |
| DRD4           | 0.160799212 | 0.651045903 | 2.01749893   | 1.40E-23    | 4.87E-23    |
| SLC2A1         | 16.14210251 | 63.5368224  | 1.976764438  | 6.96E-30    | 4.33E-29    |
| SLC2A3         | 5.570609986 | 22.7955221  | 2.032843235  | 1.51E-26    | 7.10E-26    |
| SLC2A12        | 3.539748913 | 0.332891282 | -3.410524036 | 1.12E-39    | 1.29E-37    |
| SLC2A14        | 0.028615941 | 0.151614152 | 2.405513481  | 1.76E-19    | 5.19E-19    |
| ALOX5          | 2.980667235 | 12.6033022  | 2.08009456   | 3.05E-25    | 1.30E-24    |
| ALOX12         | 0.42439849  | 1.025930398 | 1.273441429  | 2.06E-24    | 7.90E-24    |
| ACSF2          | 25.56426811 | 2.721778388 | -3.231507213 | 4.86E-30    | 3.29E-29    |
| TFAP2C         | 1.775898371 | 0.379051297 | -2.228084016 | 2.65E-24    | 9.97E-24    |
| NNMT           | 18.31632946 | 268.4626517 | 3.87351907   | 9.25E-36    | 1.51E-34    |
| RRM2           | 0.665280767 | 2.89982108  | 2.123928657  | 2.81E-32    | 2.49E-31    |
| CYBB           | 5.948485569 | 21.40530795 | 1.847374268  | 1.71E-20    | 5.30E-20    |

|           |             |             |              |             |             |
|-----------|-------------|-------------|--------------|-------------|-------------|
| NOX4      | 13.94177603 | 5.867594815 | -1.248573201 | 0.003417254 | 0.004136676 |
| ACSL4     | 37.34497875 | 13.09191682 | -1.512237936 | 2.99E-38    | 1.15E-36    |
| TFR2      | 0.048947392 | 0.754157325 | 3.945561616  | 5.32E-29    | 2.98E-28    |
| GOT1      | 84.95069431 | 40.84269312 | -1.05654774  | 4.68E-28    | 2.43E-27    |
| ALOX12B   | 0.090868373 | 0.354813187 | 1.965209486  | 1.93E-16    | 4.90E-16    |
| ALOX15B   | 0.078100228 | 1.511289479 | 4.274309451  | 2.52E-34    | 2.90E-33    |
| ACO1      | 25.11522347 | 12.09053945 | -1.054683497 | 1.86E-24    | 7.38E-24    |
| GABARAPL1 | 84.36010986 | 28.69902076 | -1.555559462 | 3.00E-37    | 7.66E-36    |
| EGFR      | 10.23830246 | 28.39874681 | 1.471850735  | 8.44E-24    | 2.99E-23    |
| BID       | 2.75022775  | 5.892018811 | 1.099210941  | 1.10E-35    | 1.58E-34    |
| CDKN2A    | 0.063563294 | 1.927830869 | 4.922640777  | 7.21E-42    | 1.66E-39    |
| PEBP1     | 663.8088472 | 285.8428593 | -1.215545607 | 9.00E-33    | 9.00E-32    |
| CDO1      | 1.754360218 | 0.56376283  | -1.637784737 | 9.38E-34    | 9.81E-33    |
| MYB       | 0.071952959 | 0.189660884 | 1.398296246  | 1.26E-24    | 5.18E-24    |
| LINC00472 | 4.818639603 | 1.329253511 | -1.858009626 | 2.14E-35    | 2.89E-34    |
| HILPDA    | 4.372160292 | 112.6098692 | 4.686843168  | 6.58E-39    | 3.79E-37    |
| IFNG      | 0.033548735 | 0.770130505 | 4.520772651  | 6.90E-30    | 4.33E-29    |
| TNFAIP3   | 6.156998153 | 15.3819319  | 1.320937669  | 3.51E-25    | 1.47E-24    |
| MIOX      | 203.7872566 | 43.78182319 | -2.2186599   | 2.88E-06    | 4.31E-06    |
| TAZ       | 2.512156556 | 5.38509528  | 1.100045496  | 2.19E-28    | 1.17E-27    |

**Table S3 GO and KEGG analysis in DEGs**

| ONTOLOGY | ID         | Description            | GeneRatio | pvalue   | qvalue   | Count |
|----------|------------|------------------------|-----------|----------|----------|-------|
| BP       | GO:0062197 | cellular response to   | 17/74     | 2.58E-14 | 3.43E-11 | 17    |
| BP       | GO:0001666 | response to hypoxia    | 17/74     | 3.90E-14 | 3.43E-11 | 17    |
| BP       | GO:0036293 | response to decrease   | 17/74     | 6.39E-14 | 3.74E-11 | 17    |
| BP       | GO:0070482 | response to oxygen     | 17/74     | 1.77E-13 | 7.80E-11 | 17    |
| BP       | GO:0072593 | reactive oxygen spe    | 15/74     | 3.05E-13 | 1.07E-10 | 15    |
| BP       | GO:0051186 | cofactor metabolic p   | 17/74     | 1.45E-12 | 4.26E-10 | 17    |
| BP       | GO:0034599 | cellular response to   | 14/74     | 1.19E-11 | 2.98E-09 | 14    |
| BP       | GO:0006979 | response to oxidativ   | 16/74     | 1.92E-11 | 4.22E-09 | 16    |
| BP       | GO:0097193 | intrinsic apoptotic si | 13/74     | 1.01E-10 | 1.97E-08 | 13    |
| BP       | GO:0010038 | response to metal ic   | 14/74     | 1.32E-10 | 2.31E-08 | 14    |
| BP       | GO:0006801 | superoxide metabol     | 8/74      | 4.52E-10 | 7.22E-08 | 8     |
| BP       | GO:0046916 | cellular transition m  | 9/74      | 4.93E-10 | 7.22E-08 | 9     |
| BP       | GO:0046394 | carboxylic acid bios   | 13/74     | 1.26E-09 | 1.63E-07 | 13    |
| BP       | GO:0016053 | organic acid biosynt   | 13/74     | 1.30E-09 | 1.63E-07 | 13    |
| BP       | GO:0071453 | cellular response to   | 11/74     | 1.98E-09 | 2.32E-07 | 11    |
| BP       | GO:0055076 | transition metal ion   | 9/74      | 2.69E-09 | 2.95E-07 | 9     |
| BP       | GO:0006631 | fatty acid metabolic   | 13/74     | 3.14E-09 | 3.13E-07 | 13    |
| BP       | GO:0010039 | response to iron ion   | 6/74      | 3.21E-09 | 3.13E-07 | 6     |
| BP       | GO:0019372 | lipoxygenase pathw     | 5/74      | 3.60E-09 | 3.33E-07 | 5     |
| BP       | GO:2000377 | regulation of reacti   | 10/74     | 4.93E-09 | 4.33E-07 | 10    |
| BP       | GO:0006879 | cellular iron ion hon  | 7/74      | 5.33E-09 | 4.46E-07 | 7     |
| BP       | GO:0031667 | response to nutrient   | 14/74     | 8.31E-09 | 6.41E-07 | 14    |
| BP       | GO:0071496 | cellular response to   | 12/74     | 8.46E-09 | 6.41E-07 | 12    |
| BP       | GO:0071456 | cellular response to   | 10/74     | 8.75E-09 | 6.41E-07 | 10    |
| BP       | GO:0036294 | cellular response to   | 10/74     | 1.37E-08 | 9.66E-07 | 10    |
| BP       | GO:1903409 | reactive oxygen spe    | 8/74      | 2.77E-08 | 1.87E-06 | 8     |
| BP       | GO:0055072 | iron ion homeostasi    | 7/74      | 3.16E-08 | 2.06E-06 | 7     |
| BP       | GO:0097237 | cellular response to   | 10/74     | 4.68E-08 | 2.94E-06 | 10    |
| BP       | GO:0048871 | multicellular organis  | 13/74     | 5.29E-08 | 3.20E-06 | 13    |
| BP       | GO:0071248 | cellular response to   | 9/74      | 5.53E-08 | 3.24E-06 | 9     |
| BP       | GO:2001233 | regulation of apopt    | 12/74     | 6.19E-08 | 3.51E-06 | 12    |
| BP       | GO:0006636 | unsaturated fatty ac   | 6/74      | 7.01E-08 | 3.85E-06 | 6     |
| BP       | GO:0001101 | response to acid ch    | 11/74     | 1.02E-07 | 5.44E-06 | 11    |
| BP       | GO:0042759 | long-chain fatty aci   | 5/74      | 1.12E-07 | 5.82E-06 | 5     |
| BP       | GO:0070997 | neuron death           | 11/74     | 1.18E-07 | 5.93E-06 | 11    |
| BP       | GO:0035690 | cellular response to   | 12/74     | 1.24E-07 | 6.06E-06 | 12    |
| BP       | GO:0048732 | gland development      | 12/74     | 1.28E-07 | 6.06E-06 | 12    |
| BP       | GO:0071241 | cellular response to   | 9/74      | 1.74E-07 | 7.90E-06 | 9     |
| BP       | GO:0046686 | response to cadmiu     | 6/74      | 1.79E-07 | 7.90E-06 | 6     |
| BP       | GO:0008630 | intrinsic apoptotic si | 7/74      | 1.80E-07 | 7.90E-06 | 7     |
| BP       | GO:0036003 | positive regulation c  | 5/74      | 1.86E-07 | 7.96E-06 | 5     |
| BP       | GO:0033559 | unsaturated fatty ac   | 7/74      | 2.64E-07 | 1.11E-05 | 7     |
| BP       | GO:0042554 | superoxide anion g     | 5/74      | 2.92E-07 | 1.19E-05 | 5     |
| BP       | GO:1901568 | fatty acid derivative  | 8/74      | 3.16E-07 | 1.25E-05 | 8     |
| BP       | GO:0051188 | cofactor biosynthesi   | 9/74      | 3.20E-07 | 1.25E-05 | 9     |
| BP       | GO:0071276 | cellular response to   | 5/74      | 3.37E-07 | 1.29E-05 | 5     |
| BP       | GO:0048660 | regulation of smoot    | 8/74      | 3.46E-07 | 1.30E-05 | 8     |
| BP       | GO:0010634 | positive regulation c  | 8/74      | 3.79E-07 | 1.36E-05 | 8     |
| BP       | GO:0048659 | smooth muscle cell     | 8/74      | 3.79E-07 | 1.36E-05 | 8     |
| BP       | GO:0043618 | regulation of transci  | 7/74      | 5.07E-07 | 1.78E-05 | 7     |
| BP       | GO:0016999 | antibiotic metabolic   | 7/74      | 5.36E-07 | 1.85E-05 | 7     |
| BP       | GO:0006809 | nitric oxide biosynt   | 6/74      | 5.99E-07 | 2.02E-05 | 6     |
| BP       | GO:0043620 | regulation of DNA-i    | 7/74      | 7.04E-07 | 2.33E-05 | 7     |
| BP       | GO:0046209 | nitric oxide metabol   | 6/74      | 8.70E-07 | 2.83E-05 | 6     |
| BP       | GO:0042771 | intrinsic apoptotic si | 5/74      | 9.21E-07 | 2.94E-05 | 5     |

|    |            |                            |          |             |    |
|----|------------|----------------------------|----------|-------------|----|
| BP | GO:0062012 | regulation of small r11/74 | 9.44E-07 | 2.96E-05    | 11 |
| BP | GO:2001057 | reactive nitrogen sp6/74   | 1.08E-06 | 3.30E-05    | 6  |
| BP | GO:0043434 | response to peptide11/74   | 1.11E-06 | 3.30E-05    | 11 |
| BP | GO:0031668 | cellular response to 9/74  | 1.11E-06 | 3.30E-05    | 9  |
| BP | GO:0033135 | regulation of peptid7/74   | 1.29E-06 | 3.79E-05    | 7  |
| BP | GO:1901605 | alpha-amino acid n8/74     | 1.44E-06 | 4.15E-05    | 8  |
| BP | GO:0071229 | cellular response to 8/74  | 1.73E-06 | 4.89E-05    | 8  |
| BP | GO:0015980 | energy derivation b9/74    | 1.89E-06 | 5.29E-05    | 9  |
| BP | GO:0043281 | regulation of cysteir8/74  | 2.13E-06 | 5.85E-05    | 8  |
| BP | GO:0048661 | positive regulation c6/74  | 2.97E-06 | 8.03E-05    | 6  |
| BP | GO:0031960 | response to cortico5/74    | 3.59E-06 | 9.57E-05    | 7  |
| BP | GO:0033138 | positive regulation c6/74  | 3.72E-06 | 9.77E-05    | 6  |
| BP | GO:0006633 | fatty acid biosynthei7/74  | 3.90E-06 | 0.000100224 | 7  |
| BP | GO:0042136 | neurotransmitter bic6/74   | 3.93E-06 | 0.000100224 | 6  |
| BP | GO:0051341 | regulation of oxidor6/74   | 4.15E-06 | 0.000104335 | 6  |
| BP | GO:0031669 | cellular response to 8/74  | 4.39E-06 | 0.000108676 | 8  |
| BP | GO:0001676 | long-chain fatty aci6/74   | 4.63E-06 | 0.000110932 | 6  |
| BP | GO:0033002 | muscle cell prolifera8/74  | 4.67E-06 | 0.000110932 | 8  |
| BP | GO:2000116 | regulation of cysteir8/74  | 4.67E-06 | 0.000110932 | 8  |
| BP | GO:0032768 | regulation of mono5/74     | 5.85E-06 | 0.000136944 | 5  |
| BP | GO:0003018 | vascular process in c7/74  | 5.98E-06 | 0.000136944 | 7  |
| BP | GO:0006690 | icosanoid metabolic6/74    | 6.00E-06 | 0.000136944 | 6  |
| BP | GO:0043457 | regulation of cellula4/74  | 6.60E-06 | 0.000148675 | 4  |
| BP | GO:0071281 | cellular response to 3/74  | 7.03E-06 | 0.000156455 | 3  |
| BP | GO:0006732 | coenzyme metaboli8/74      | 7.51E-06 | 0.000165078 | 8  |
| BP | GO:0050730 | regulation of peptid8/74   | 7.73E-06 | 0.000167769 | 8  |
| BP | GO:0043619 | regulation of transci3/74  | 9.64E-06 | 0.000205784 | 3  |
| BP | GO:0000041 | transition metal ion 6/74  | 9.74E-06 | 0.000205784 | 6  |
| BP | GO:0044282 | small molecule cata10/74   | 9.83E-06 | 0.000205784 | 10 |
| BP | GO:1901617 | organic hydroxy cor8/74    | 1.02E-05 | 0.000211369 | 8  |
| BP | GO:0042594 | response to starvati7/74   | 1.06E-05 | 0.000216656 | 7  |
| BP | GO:0052547 | regulation of peptid10/74  | 1.13E-05 | 0.000226585 | 10 |
| BP | GO:1901654 | response to ketone 7/74    | 1.13E-05 | 0.000226585 | 7  |
| BP | GO:0045333 | cellular respiration 7/74  | 1.17E-05 | 0.000231696 | 7  |
| BP | GO:0006826 | iron ion transport 5/74    | 1.27E-05 | 0.000245915 | 5  |
| BP | GO:0006534 | cysteine metabolic r3/74   | 1.28E-05 | 0.000245915 | 3  |
| BP | GO:0016054 | organic acid catabo 8/74   | 1.30E-05 | 0.000245915 | 8  |
| BP | GO:0046395 | carboxylic acid catal8/74  | 1.30E-05 | 0.000245915 | 8  |
| BP | GO:0072332 | intrinsic apoptotic si5/74 | 1.44E-05 | 0.000268824 | 5  |
| BP | GO:0006066 | alcohol metabolic p 9/74   | 1.52E-05 | 0.000277258 | 9  |
| BP | GO:0043536 | positive regulation c5/74  | 1.53E-05 | 0.000277258 | 5  |
| BP | GO:0071260 | cellular response to 5/74  | 1.53E-05 | 0.000277258 | 5  |
| BP | GO:0098754 | detoxification 6/74        | 1.72E-05 | 0.000304221 | 6  |
| BP | GO:0008652 | cellular amino acid l5/74  | 1.73E-05 | 0.000304221 | 5  |
| BP | GO:0050679 | positive regulation c7/74  | 1.73E-05 | 0.000304221 | 7  |
| BP | GO:0010632 | regulation of epithe8/74   | 1.96E-05 | 0.000340405 | 8  |
| BP | GO:0048545 | response to steroid 9/74   | 2.00E-05 | 0.000344104 | 9  |
| BP | GO:0000096 | sulfur amino acid m 4/74   | 2.06E-05 | 0.000348288 | 4  |
| BP | GO:0009069 | serine family amino 4/74   | 2.06E-05 | 0.000348288 | 4  |
| BP | GO:0035296 | regulation of tube d6/74   | 2.19E-05 | 0.000363882 | 6  |
| BP | GO:0097746 | regulation of blood 6/74   | 2.19E-05 | 0.000363882 | 6  |
| BP | GO:0035150 | regulation of tube s 6/74  | 2.28E-05 | 0.000374983 | 6  |
| BP | GO:0090559 | regulation of memb5/74     | 2.31E-05 | 0.000376605 | 5  |
| BP | GO:0018105 | peptidyl-serine pho 8/74   | 2.38E-05 | 0.000383089 | 8  |
| BP | GO:0015711 | organic anion transi10/74  | 2.46E-05 | 0.000390788 | 10 |
| BP | GO:0051384 | response to glucocc6/74    | 2.47E-05 | 0.000390788 | 6  |
| BP | GO:0007584 | response to nutrient7/74   | 2.57E-05 | 0.000402673 | 7  |
| BP | GO:0002791 | regulation of peptid10/74  | 2.68E-05 | 0.0004172   | 10 |

|    |            |                            |          |             |   |
|----|------------|----------------------------|----------|-------------|---|
| BP | GO:0097191 | extrinsic apoptotic s7/74  | 2.96E-05 | 0.000457108 | 7 |
| BP | GO:0042133 | neurotransmitter mε6/74    | 3.21E-05 | 0.000490352 | 6 |
| BP | GO:0045981 | positive regulation c4/74  | 3.27E-05 | 0.000490352 | 4 |
| BP | GO:1900544 | positive regulation c4/74  | 3.27E-05 | 0.000490352 | 4 |
| BP | GO:1901214 | regulation of neuroi8/74   | 3.29E-05 | 0.000490352 | 8 |
| BP | GO:0007589 | body fluid secretion5/74   | 3.38E-05 | 0.000499201 | 5 |
| BP | GO:0001894 | tissue homeostasis 7/74    | 3.41E-05 | 0.000499964 | 7 |
| BP | GO:2001236 | regulation of extrins6/74  | 3.46E-05 | 0.000502136 | 6 |
| BP | GO:2001234 | negative regulation 7/74   | 3.51E-05 | 0.000505613 | 7 |
| BP | GO:0000302 | response to reactiveε7/74  | 3.71E-05 | 0.000526543 | 7 |
| BP | GO:0043467 | regulation of generε6/74   | 3.71E-05 | 0.000526543 | 6 |
| BP | GO:0007595 | lactation 4/74             | 3.88E-05 | 0.000536633 | 4 |
| BP | GO:0043651 | linoleic acid metabo3/74   | 3.91E-05 | 0.000536633 | 3 |
| BP | GO:0007568 | aging 8/74                 | 3.94E-05 | 0.000536633 | 8 |
| BP | GO:0010660 | regulation of muscle5/74   | 3.94E-05 | 0.000536633 | 5 |
| BP | GO:0048010 | vascular endothelial5/74   | 3.94E-05 | 0.000536633 | 5 |
| BP | GO:0018209 | peptidyl-serine moε8/74    | 4.02E-05 | 0.000544149 | 8 |
| BP | GO:0030857 | negative regulation 4/74   | 4.21E-05 | 0.000560525 | 4 |
| BP | GO:2001238 | positive regulation c4/74  | 4.21E-05 | 0.000560525 | 4 |
| BP | GO:0072330 | monocarboxylic aciε7/74    | 4.25E-05 | 0.000561195 | 7 |
| BP | GO:2001243 | negative regulation 5/74   | 4.35E-05 | 0.000570454 | 5 |
| BP | GO:0051402 | neuron apoptotic p17/74    | 4.48E-05 | 0.000577845 | 7 |
| BP | GO:0046677 | response to antibiot8/74   | 4.49E-05 | 0.000577845 | 8 |
| BP | GO:0052548 | regulation of endop9/74    | 4.50E-05 | 0.000577845 | 9 |
| BP | GO:1901570 | fatty acid derivative 5/74 | 4.57E-05 | 0.000579797 | 5 |
| BP | GO:0010506 | regulation of autopl8/74   | 4.58E-05 | 0.000579797 | 8 |
| BP | GO:0010657 | muscle cell apoptot5/74    | 4.79E-05 | 0.000601607 | 5 |
| BP | GO:0001933 | negative regulation 9/74   | 4.84E-05 | 0.000602408 | 9 |
| BP | GO:2001242 | regulation of intrins6/74  | 4.90E-05 | 0.000602408 | 6 |
| BP | GO:0019369 | arachidonic acid me4/74    | 4.93E-05 | 0.000602408 | 4 |
| BP | GO:0050999 | regulation of nitric-4/74  | 4.93E-05 | 0.000602408 | 4 |
| BP | GO:0098869 | cellular oxidant detε5/74  | 5.27E-05 | 0.000634306 | 5 |
| BP | GO:2000379 | positive regulation c5/74  | 5.27E-05 | 0.000634306 | 5 |
| BP | GO:0042180 | cellular ketone metε7/74   | 5.38E-05 | 0.000642852 | 7 |
| BP | GO:0034614 | cellular response to 6/74  | 5.42E-05 | 0.000644082 | 6 |
| BP | GO:0030949 | positive regulation c3/74  | 5.53E-05 | 0.000652869 | 3 |
| BP | GO:0060249 | anatomical structureε9/74  | 5.78E-05 | 0.000675559 | 9 |
| BP | GO:0045926 | negative regulation 7/74   | 5.80E-05 | 0.000675559 | 7 |
| BP | GO:1901606 | alpha-amino acid cε5/74    | 6.33E-05 | 0.000732243 | 5 |
| BP | GO:0034755 | iron ion transmembr3/74    | 6.49E-05 | 0.000745872 | 3 |
| BP | GO:1904659 | glucose transmembr5/74     | 6.92E-05 | 0.000787734 | 5 |
| BP | GO:0006520 | cellular amino acid i8/74  | 6.95E-05 | 0.000787734 | 8 |
| BP | GO:0010631 | epithelial cell migrat8/74 | 7.52E-05 | 0.000847656 | 8 |
| BP | GO:2001235 | positive regulation c6/74  | 7.71E-05 | 0.000863207 | 6 |
| BP | GO:0001505 | regulation of neuroi8/74   | 7.98E-05 | 0.000877711 | 8 |
| BP | GO:0090132 | epithelium migratio8/74    | 7.98E-05 | 0.000877711 | 8 |
| BP | GO:0046883 | regulation of hormoε7/74   | 7.99E-05 | 0.000877711 | 7 |
| BP | GO:0032722 | positive regulation c4/74  | 8.20E-05 | 0.000887418 | 4 |
| BP | GO:0008645 | hexose transmembr5/74      | 8.23E-05 | 0.000887418 | 5 |
| BP | GO:1990748 | cellular detoxificatio5/74 | 8.23E-05 | 0.000887418 | 5 |
| BP | GO:0001667 | ameboidal-type cell9/74    | 8.55E-05 | 0.000916697 | 9 |
| BP | GO:1901522 | positive regulation c3/74  | 8.72E-05 | 0.000928994 | 3 |
| BP | GO:0097755 | positive regulation c4/74  | 8.77E-05 | 0.000929214 | 4 |
| BP | GO:0015749 | monosaccharide tra5/74     | 8.95E-05 | 0.000938213 | 5 |
| BP | GO:0090130 | tissue migration 8/74      | 8.97E-05 | 0.000938213 | 8 |
| BP | GO:0018108 | peptidyl-tyrosine p18/74   | 9.32E-05 | 0.000964248 | 8 |
| BP | GO:1900542 | regulation of purine5/74   | 9.33E-05 | 0.000964248 | 5 |
| BP | GO:0043491 | protein kinase B sigi7/74  | 9.42E-05 | 0.000964248 | 7 |



|    |            |                        |      |             |             |   |
|----|------------|------------------------|------|-------------|-------------|---|
| BP | GO:0042326 | negative regulation    | 9/74 | 9.43E-05    | 0.000964248 | 9 |
| BP | GO:0022900 | electron transport c   | 6/74 | 9.53E-05    | 0.000967956 | 6 |
| BP | GO:0007569 | cell aging             | 5/74 | 9.72E-05    | 0.000976153 | 5 |
| BP | GO:0034219 | carbohydrate transp    | 5/74 | 9.72E-05    | 0.000976153 | 5 |
| BP | GO:0018212 | peptidyl-tyrosine m    | 8/74 | 9.86E-05    | 0.000985166 | 8 |
| BP | GO:0061436 | establishment of ski   | 3/74 | 1.00E-04    | 0.00099308  | 3 |
| BP | GO:0050708 | regulation of protei   | 9/74 | 0.000100645 | 0.000993889 | 9 |
| BP | GO:0006140 | regulation of nuclec   | 5/74 | 0.000101204 | 0.000993889 | 5 |
| BP | GO:0006790 | sulfur compound m      | 8/74 | 0.00011037  | 0.001077884 | 8 |
| BP | GO:0044272 | sulfur compound bi     | 6/74 | 0.000113407 | 0.00109537  | 6 |
| BP | GO:0050731 | positive regulation c  | 6/74 | 0.000113407 | 0.00109537  | 6 |
| BP | GO:0022612 | gland morphogene       | 5/74 | 0.000114059 | 0.001095646 | 5 |
| BP | GO:0009165 | nucleotide biosynth    | 7/74 | 0.000115585 | 0.001104269 | 7 |
| BP | GO:2000378 | negative regulation    | 4/74 | 0.00012068  | 0.001146722 | 4 |
| BP | GO:0050678 | regulation of epithe   | 8/74 | 0.00012324  | 0.001164751 | 8 |
| BP | GO:1901293 | nucleoside phospho     | 7/74 | 0.000126284 | 0.001187134 | 7 |
| BP | GO:0060571 | morphogenesis of a     | 3/74 | 0.000129122 | 0.001207356 | 3 |
| BP | GO:0045765 | regulation of angio    | 8/74 | 0.000134893 | 0.001245856 | 8 |
| BP | GO:0019748 | secondary metaboli     | 4/74 | 0.000136074 | 0.001245856 | 4 |
| BP | GO:0045428 | regulation of nitric c | 4/74 | 0.000136074 | 0.001245856 | 4 |
| BP | GO:1905710 | positive regulation c  | 4/74 | 0.000136074 | 0.001245856 | 4 |
| BP | GO:0009063 | cellular amino acid c  | 5/74 | 0.000138227 | 0.001259008 | 5 |
| BP | GO:0033561 | regulation of water    | 3/74 | 0.000145549 | 0.001312492 | 3 |
| BP | GO:0006914 | autophagy              | 9/74 | 0.000146339 | 0.001312492 | 9 |
| BP | GO:0061919 | process utilizing aut  | 9/74 | 0.000146339 | 0.001312492 | 9 |
| BP | GO:0010595 | positive regulation c  | 5/74 | 0.000154501 | 0.001378658 | 5 |
| BP | GO:0009410 | response to xenobio    | 7/74 | 0.000156594 | 0.001390282 | 7 |
| BP | GO:0030100 | regulation of endoc    | 6/74 | 0.000162169 | 0.001432543 | 6 |
| BP | GO:0090276 | regulation of peptid   | 6/74 | 0.000175483 | 0.001542405 | 6 |
| BP | GO:1990776 | response to angioten   | 3/74 | 0.000182351 | 0.001594792 | 3 |
| BP | GO:0051881 | regulation of mitoch   | 4/74 | 0.000190787 | 0.001660317 | 4 |
| BP | GO:0001889 | liver development      | 5/74 | 0.000198164 | 0.001716019 | 5 |
| BP | GO:0031100 | animal organ regen     | 4/74 | 0.000201245 | 0.001725698 | 4 |
| BP | GO:1903524 | positive regulation c  | 4/74 | 0.000201245 | 0.001725698 | 4 |
| BP | GO:0007263 | nitric oxide mediate   | 3/74 | 0.000202813 | 0.001730698 | 3 |
| BP | GO:0019216 | regulation of lipid m  | 8/74 | 0.000214694 | 0.001823234 | 8 |
| BP | GO:0009895 | negative regulation    | 7/74 | 0.000217163 | 0.001826554 | 7 |
| BP | GO:0046879 | hormone secretion      | 7/74 | 0.000217163 | 0.001826554 | 7 |
| BP | GO:0061008 | hepaticobiliary syste  | 5/74 | 0.000219519 | 0.001837577 | 5 |
| BP | GO:0071549 | cellular response to   | 3/74 | 0.000224707 | 0.001863264 | 3 |
| BP | GO:0097421 | liver regeneration     | 3/74 | 0.000224707 | 0.001863264 | 3 |
| BP | GO:0010876 | lipid localization     | 8/74 | 0.000233051 | 0.001923372 | 8 |
| BP | GO:0062013 | positive regulation c  | 5/74 | 0.000242584 | 0.001992697 | 5 |
| BP | GO:0032770 | positive regulation c  | 3/74 | 0.000248076 | 0.002018946 | 3 |
| BP | GO:1902230 | negative regulation    | 3/74 | 0.000248076 | 0.002018946 | 3 |
| BP | GO:0009914 | hormone transport      | 7/74 | 0.000258781 | 0.002088145 | 7 |
| BP | GO:0030879 | mammary gland de       | 5/74 | 0.000258955 | 0.002088145 | 5 |
| BP | GO:1901342 | regulation of vascul   | 8/74 | 0.0002609   | 0.00209422  | 8 |
| BP | GO:0045907 | positive regulation c  | 3/74 | 0.000272962 | 0.002181083 | 3 |
| BP | GO:0009108 | coenzyme biosynth      | 5/74 | 0.000285071 | 0.002267529 | 5 |
| BP | GO:0008643 | carbohydrate transp    | 5/74 | 0.00030356  | 0.002403726 | 5 |
| BP | GO:0006163 | purine nucleotide m    | 8/74 | 0.000305372 | 0.002407226 | 8 |
| BP | GO:0009267 | cellular response to   | 5/74 | 0.00031314  | 0.002449934 | 5 |
| BP | GO:0032642 | regulation of chem     | 4/74 | 0.000314817 | 0.002449934 | 4 |
| BP | GO:0050673 | epithelial cell prolif | 8/74 | 0.000314971 | 0.002449934 | 8 |
| BP | GO:0006970 | response to osmotic    | 4/74 | 0.000329772 | 0.002542562 | 4 |
| BP | GO:2000106 | regulation of leukoc   | 4/74 | 0.000329772 | 0.002542562 | 4 |
| BP | GO:0046942 | carboxylic acid trans  | 7/74 | 0.0003361   | 0.002557701 | 7 |

|    |            |                             |             |             |   |
|----|------------|-----------------------------|-------------|-------------|---|
| BP | GO:0071214 | cellular response to 7/74   | 0.0003361   | 0.002557701 | 7 |
| BP | GO:0104004 | cellular response to 7/74   | 0.0003361   | 0.002557701 | 7 |
| BP | GO:0043154 | negative regulation 4/74    | 0.000345229 | 0.002615842 | 4 |
| BP | GO:0015849 | organic acid transp 7/74    | 0.000348518 | 0.002629434 | 7 |
| BP | GO:0072525 | pyridine-containing 3/74    | 0.000357129 | 0.002671467 | 3 |
| BP | GO:1905332 | positive regulation c 3/74  | 0.000357129 | 0.002671467 | 3 |
| BP | GO:0043405 | regulation of MAP k 7/74    | 0.000374459 | 0.002777975 | 7 |
| BP | GO:0001776 | leukocyte homeost 4/74      | 0.000377688 | 0.002777975 | 4 |
| BP | GO:0008625 | extrinsic apoptotic s 4/74  | 0.000377688 | 0.002777975 | 4 |
| BP | GO:0034637 | cellular carbohydrate 4/74  | 0.000377688 | 0.002777975 | 4 |
| BP | GO:0030856 | regulation of epithe 5/74   | 0.000386768 | 0.00279334  | 5 |
| BP | GO:0043535 | regulation of blood 5/74    | 0.000386768 | 0.00279334  | 5 |
| BP | GO:0030947 | regulation of vascul 3/74   | 0.000388489 | 0.00279334  | 3 |
| BP | GO:0033572 | transferrin transport 3/74  | 0.000388489 | 0.00279334  | 3 |
| BP | GO:0071634 | regulation of transfc 3/74  | 0.000388489 | 0.00279334  | 3 |
| BP | GO:0009314 | response to radiatio 8/74   | 0.000389311 | 0.00279334  | 8 |
| BP | GO:0043271 | negative regulation 5/74    | 0.000398269 | 0.002845993 | 5 |
| BP | GO:0051896 | regulation of protei 6/74   | 0.000413286 | 0.002941349 | 6 |
| BP | GO:0038083 | peptidyl-tyrosine at 3/74   | 0.000421567 | 0.00297619  | 3 |
| BP | GO:0090050 | positive regulation c 3/74  | 0.000421567 | 0.00297619  | 3 |
| BP | GO:0032602 | chemokine producti 4/74     | 0.00043039  | 0.003022464 | 4 |
| BP | GO:0048872 | homeostasis of num 6/74     | 0.000431561 | 0.003022464 | 6 |
| BP | GO:0010939 | regulation of necrot 3/74   | 0.000456403 | 0.003158693 | 3 |
| BP | GO:0050892 | intestinal absorptio 3/74   | 0.000456403 | 0.003158693 | 3 |
| BP | GO:0071604 | transforming growth 3/74    | 0.000456403 | 0.003158693 | 3 |
| BP | GO:0030072 | peptide hormone se 6/74     | 0.000470003 | 0.003240061 | 6 |
| BP | GO:0015718 | monocarboxylic acid 5/74    | 0.000472796 | 0.003246583 | 5 |
| BP | GO:2000117 | negative regulation 4/74    | 0.000488143 | 0.003308018 | 4 |
| BP | GO:0001819 | positive regulation c 8/74  | 0.000491204 | 0.003308018 | 8 |
| BP | GO:0072521 | purine-containing c 8/74    | 0.000491204 | 0.003308018 | 8 |
| BP | GO:0010661 | positive regulation c 3/74  | 0.000493033 | 0.003308018 | 3 |
| BP | GO:0072524 | pyridine-containing 3/74    | 0.000493033 | 0.003308018 | 3 |
| BP | GO:1902229 | regulation of intrins 3/74  | 0.000493033 | 0.003308018 | 3 |
| BP | GO:1901655 | cellular response to 4/74   | 0.000508564 | 0.003399245 | 4 |
| BP | GO:0035051 | cardiocyte differenti 5/74  | 0.000528019 | 0.003512464 | 5 |
| BP | GO:1901216 | positive regulation c 4/74  | 0.000529585 | 0.003512464 | 4 |
| BP | GO:0071548 | response to dexam 3/74      | 0.000531497 | 0.003512464 | 3 |
| BP | GO:0045861 | negative regulation 7/74    | 0.000537252 | 0.003537202 | 7 |
| BP | GO:0050873 | brown fat cell differ 3/74  | 0.00057183  | 0.003722357 | 3 |
| BP | GO:0019217 | regulation of fatty a 4/74  | 0.000573471 | 0.003722357 | 4 |
| BP | GO:0097327 | response to antineo 4/74    | 0.000573471 | 0.003722357 | 4 |
| BP | GO:0031331 | positive regulation c 7/74  | 0.000573845 | 0.003722357 | 7 |
| BP | GO:0016241 | regulation of macro 5/74    | 0.000587963 | 0.003799913 | 5 |
| BP | GO:0015908 | fatty acid transport 4/74   | 0.000596357 | 0.003840044 | 4 |
| BP | GO:0046165 | alcohol biosynthetic 5/74   | 0.000652881 | 0.004188671 | 5 |
| BP | GO:0045429 | positive regulation c 3/74  | 0.000658254 | 0.004207786 | 3 |
| BP | GO:0001936 | regulation of endotl 5/74   | 0.000669918 | 0.004251427 | 5 |
| BP | GO:0051897 | positive regulation c 5/74  | 0.000669918 | 0.004251427 | 5 |
| BP | GO:0010749 | regulation of nitric c 2/74 | 0.000683228 | 0.004274174 | 2 |
| BP | GO:0030647 | aminoglycoside anti 2/74    | 0.000683228 | 0.004274174 | 2 |
| BP | GO:0033483 | gas homeostasis 2/74        | 0.000683228 | 0.004274174 | 2 |
| BP | GO:2000271 | positive regulation c 2/74  | 0.000683228 | 0.004274174 | 2 |
| BP | GO:1903426 | regulation of reactiv 4/74  | 0.000694412 | 0.004328733 | 4 |
| BP | GO:0014002 | astrocyte developm 3/74     | 0.000704416 | 0.004360173 | 3 |
| BP | GO:1904407 | positive regulation c 3/74  | 0.000704416 | 0.004360173 | 3 |
| BP | GO:0048771 | tissue remodeling 5/74      | 0.000723033 | 0.004459704 | 5 |
| BP | GO:0032868 | response to insulin 6/74    | 0.000731676 | 0.004497238 | 6 |
| BP | GO:0010565 | regulation of cellula 5/74  | 0.000741419 | 0.004509817 | 5 |

|    |            |                       |      |             |             |   |
|----|------------|-----------------------|------|-------------|-------------|---|
| BP | GO:0043534 | blood vessel endothel | 5/74 | 0.000741419 | 0.004509817 | 5 |
| BP | GO:0071466 | cellular response to  | 5/74 | 0.000741419 | 0.004509817 | 5 |
| BP | GO:0034766 | negative regulation   | 4/74 | 0.00074749  | 0.004531064 | 4 |
| BP | GO:1902743 | regulation of lamelli | 3/74 | 0.000752592 | 0.004546313 | 3 |
| BP | GO:0006869 | lipid transport       | 7/74 | 0.000763867 | 0.004598622 | 7 |
| BP | GO:0071887 | leukocyte apoptotic   | 4/74 | 0.000775077 | 0.004638261 | 4 |
| BP | GO:0042176 | regulation of protei  | 7/74 | 0.000775728 | 0.004638261 | 7 |
| BP | GO:1904036 | negative regulation   | 3/74 | 0.000802816 | 0.004783953 | 3 |
| BP | GO:2000045 | regulation of G1/S t  | 5/74 | 0.000818484 | 0.004860519 | 5 |
| BP | GO:0019852 | L-ascorbic acid met   | 2/74 | 0.000832914 | 0.004860519 | 2 |
| BP | GO:0046886 | positive regulation   | 2/74 | 0.000832914 | 0.004860519 | 2 |
| BP | GO:0048548 | regulation of pinocy  | 2/74 | 0.000832914 | 0.004860519 | 2 |
| BP | GO:0072584 | caveolin-mediated     | 2/74 | 0.000832914 | 0.004860519 | 2 |
| BP | GO:2000392 | regulation of lamelli | 2/74 | 0.000832914 | 0.004860519 | 2 |
| BP | GO:0000082 | G1/S transition of m  | 6/74 | 0.00083502  | 0.004860519 | 6 |
| BP | GO:0006953 | acute-phase respon    | 3/74 | 0.000855123 | 0.004944791 | 3 |
| BP | GO:1903580 | positive regulation   | 3/74 | 0.000855123 | 0.004944791 | 3 |
| BP | GO:1905475 | regulation of protei  | 5/74 | 0.000880096 | 0.005070408 | 5 |
| BP | GO:0044262 | cellular carbohydrat  | 6/74 | 0.000882615 | 0.005070408 | 6 |
| BP | GO:0014706 | striated muscle tissu | 7/74 | 0.000889189 | 0.005091535 | 7 |
| BP | GO:0008542 | visual learning       | 3/74 | 0.000909547 | 0.005191193 | 3 |
| BP | GO:0010959 | regulation of metal   | 7/74 | 0.00094365  | 0.005368408 | 7 |
| BP | GO:0048546 | digestive tract morp  | 3/74 | 0.00096612  | 0.005451422 | 3 |
| BP | GO:0005996 | monosaccharide me     | 6/74 | 0.000966569 | 0.005451422 | 6 |
| BP | GO:0001935 | endothelial cell prol | 5/74 | 0.000967546 | 0.005451422 | 5 |
| BP | GO:1904019 | epithelial cell apopt | 4/74 | 0.000988703 | 0.005544555 | 4 |
| BP | GO:0043112 | receptor metabolic    | 5/74 | 0.000990384 | 0.005544555 | 5 |
| BP | GO:0006563 | L-serine metabolic    | 2/74 | 0.000996934 | 0.0055459   | 2 |
| BP | GO:0045080 | positive regulation   | 2/74 | 0.000996934 | 0.0055459   | 2 |
| BP | GO:0009150 | purine ribonucleotic  | 7/74 | 0.001015397 | 0.005630074 | 7 |
| BP | GO:0042063 | gliogenesis           | 6/74 | 0.001019817 | 0.005630074 | 6 |
| BP | GO:0001938 | positive regulation   | 4/74 | 0.001022274 | 0.005630074 | 4 |
| BP | GO:0042398 | cellular modified arr | 3/74 | 0.001024876 | 0.005630074 | 3 |
| BP | GO:0021987 | cerebral cortex deve  | 4/74 | 0.001056639 | 0.005768508 | 4 |
| BP | GO:0043200 | response to amino     | 4/74 | 0.001056639 | 0.005768508 | 4 |
| BP | GO:0048146 | positive regulation   | 3/74 | 0.001085846 | 0.005909609 | 3 |
| BP | GO:0016236 | macroautophagy        | 6/74 | 0.001113552 | 0.006041691 | 6 |
| BP | GO:0050890 | cognition             | 6/74 | 0.001133069 | 0.006125343 | 6 |
| BP | GO:0046890 | regulation of lipid b | 5/74 | 0.001135939 | 0.006125343 | 5 |
| BP | GO:0060537 | muscle tissue devel   | 7/74 | 0.001155338 | 0.006185123 | 7 |
| BP | GO:0034341 | response to interfer  | 5/74 | 0.001161661 | 0.006185123 | 5 |
| BP | GO:0010822 | positive regulation   | 4/74 | 0.001164598 | 0.006185123 | 4 |
| BP | GO:0044843 | cell cycle G1/S phas  | 6/74 | 0.001172889 | 0.006185123 | 6 |
| BP | GO:0010870 | positive regulation   | 2/74 | 0.001175173 | 0.006185123 | 2 |
| BP | GO:0010940 | positive regulation   | 2/74 | 0.001175173 | 0.006185123 | 2 |
| BP | GO:0050713 | negative regulation   | 2/74 | 0.001175173 | 0.006185123 | 2 |
| BP | GO:0090594 | inflammatory respo    | 2/74 | 0.001175173 | 0.006185123 | 2 |
| BP | GO:0007632 | visual behavior       | 3/74 | 0.001214559 | 0.006354364 | 3 |
| BP | GO:0010043 | response to zinc ion  | 3/74 | 0.001214559 | 0.006354364 | 3 |
| BP | GO:1902806 | regulation of cell cy | 5/74 | 0.001241421 | 0.006475629 | 5 |
| BP | GO:0009259 | ribonucleotide met    | 7/74 | 0.001256765 | 0.006536274 | 7 |
| BP | GO:0051353 | positive regulation   | 3/74 | 0.001282363 | 0.006630172 | 3 |
| BP | GO:0097345 | mitochondrial outer   | 3/74 | 0.001282363 | 0.006630172 | 3 |
| BP | GO:0001558 | regulation of cell gr | 7/74 | 0.001292085 | 0.006660847 | 7 |
| BP | GO:0045766 | positive regulation   | 5/74 | 0.001296801 | 0.006665614 | 5 |
| BP | GO:0010508 | positive regulation   | 4/74 | 0.001320277 | 0.006766497 | 4 |
| BP | GO:0044273 | sulfur compound ca    | 3/74 | 0.001352506 | 0.006848885 | 3 |
| BP | GO:0046456 | icosanoid biosynthe   | 3/74 | 0.001352506 | 0.006848885 | 3 |

|    |            |                             |             |             |   |
|----|------------|-----------------------------|-------------|-------------|---|
| BP | GO:1903578 | regulation of ATP m4/74     | 0.00136136  | 0.006848885 | 4 |
| BP | GO:0009071 | serine family amino 2/74    | 0.001367521 | 0.006848885 | 2 |
| BP | GO:0034356 | NAD biosynthesis vi2/74     | 0.001367521 | 0.006848885 | 2 |
| BP | GO:0050667 | homocysteine meta 2/74      | 0.001367521 | 0.006848885 | 2 |
| BP | GO:0051712 | positive regulation c2/74   | 0.001367521 | 0.006848885 | 2 |
| BP | GO:0061051 | positive regulation c2/74   | 0.001367521 | 0.006848885 | 2 |
| BP | GO:1905477 | positive regulation c4/74   | 0.001403328 | 0.007008247 | 4 |
| BP | GO:0007623 | circadian rhythm 5/74       | 0.001413021 | 0.007016785 | 5 |
| BP | GO:0016051 | carbohydrate biosyr5/74     | 0.001413021 | 0.007016785 | 5 |
| BP | GO:0019693 | ribose phosphate m7/74      | 0.001441231 | 0.00713671  | 7 |
| BP | GO:0009896 | positive regulation c7/74   | 0.001460784 | 0.007213214 | 7 |
| BP | GO:0009612 | response to mechar5/74      | 0.001473932 | 0.007257752 | 5 |
| BP | GO:0019751 | polyol metabolic pr4/74     | 0.001489961 | 0.007316187 | 4 |
| BP | GO:0042743 | hydrogen peroxide 3/74      | 0.00149993  | 0.007324219 | 3 |
| BP | GO:1903428 | positive regulation c3/74   | 0.00149993  | 0.007324219 | 3 |
| BP | GO:0051047 | positive regulation c7/74   | 0.001520692 | 0.007405029 | 7 |
| BP | GO:0006898 | receptor-mediated 6/74      | 0.001531452 | 0.007411394 | 6 |
| BP | GO:0009416 | response to light sti 6/74  | 0.001531452 | 0.007411394 | 6 |
| BP | GO:0045471 | response to ethanol4/74     | 0.001534647 | 0.007411394 | 4 |
| BP | GO:0000098 | sulfur amino acid ca2/74    | 0.001573866 | 0.007453422 | 2 |
| BP | GO:0010273 | detoxification of co2/74    | 0.001573866 | 0.007453422 | 2 |
| BP | GO:0032352 | positive regulation c2/74   | 0.001573866 | 0.007453422 | 2 |
| BP | GO:0045073 | regulation of chemc2/74     | 0.001573866 | 0.007453422 | 2 |
| BP | GO:1990169 | stress response to c2/74    | 0.001573866 | 0.007453422 | 2 |
| BP | GO:0019229 | regulation of vasoc3/74     | 0.001577269 | 0.007453422 | 3 |
| BP | GO:0071385 | cellular response to 3/74   | 0.001577269 | 0.007453422 | 3 |
| BP | GO:1902041 | regulation of extrins3/74   | 0.001577269 | 0.007453422 | 3 |
| BP | GO:0048608 | reproductive structu 7/74   | 0.001582505 | 0.007458116 | 7 |
| BP | GO:2001020 | regulation of respor5/74    | 0.00160154  | 0.007527642 | 5 |
| BP | GO:0046887 | positive regulation c4/74   | 0.001626806 | 0.007626008 | 4 |
| BP | GO:0061458 | reproductive system 7/74    | 0.001646266 | 0.007696707 | 7 |
| BP | GO:0034763 | negative regulation 4/74    | 0.001674299 | 0.007807008 | 4 |
| BP | GO:0071375 | cellular response to 6/74   | 0.001712317 | 0.007963155 | 6 |
| BP | GO:0010001 | glial cell differentiat5/74 | 0.001737104 | 0.008025161 | 5 |
| BP | GO:0002294 | CD4-positive, alpha 3/74    | 0.001739346 | 0.008025161 | 3 |
| BP | GO:1902110 | positive regulation c3/74   | 0.001739346 | 0.008025161 | 3 |
| BP | GO:0051222 | positive regulation c7/74   | 0.001779797 | 0.008086748 | 7 |
| BP | GO:0006103 | 2-oxoglutarate met:2/74     | 0.001794096 | 0.008086748 | 2 |
| BP | GO:0032225 | regulation of synapt2/74    | 0.001794096 | 0.008086748 | 2 |
| BP | GO:0042033 | chemokine biosynth2/74      | 0.001794096 | 0.008086748 | 2 |
| BP | GO:0042448 | progesterone meta2/74       | 0.001794096 | 0.008086748 | 2 |
| BP | GO:0050711 | negative regulation 2/74    | 0.001794096 | 0.008086748 | 2 |
| BP | GO:0050755 | chemokine metabol2/74       | 0.001794096 | 0.008086748 | 2 |
| BP | GO:0090335 | regulation of brown2/74     | 0.001794096 | 0.008086748 | 2 |
| BP | GO:1902166 | negative regulation 2/74    | 0.001794096 | 0.008086748 | 2 |
| BP | GO:0002287 | alpha-beta T cell ac 3/74   | 0.001824139 | 0.008159399 | 3 |
| BP | GO:0002293 | alpha-beta T cell di3/74    | 0.001824139 | 0.008159399 | 3 |
| BP | GO:0071384 | cellular response to 3/74   | 0.001824139 | 0.008159399 | 3 |
| BP | GO:0055007 | cardiac muscle cell c4/74   | 0.001873937 | 0.008360873 | 4 |
| BP | GO:0002260 | lymphocyte homeos3/74       | 0.001911472 | 0.008379466 | 3 |
| BP | GO:0031640 | killing of cells of oth3/74 | 0.001911472 | 0.008379466 | 3 |
| BP | GO:0045453 | bone resorption 3/74        | 0.001911472 | 0.008379466 | 3 |
| BP | GO:0051205 | protein insertion int 3/74  | 0.001911472 | 0.008379466 | 3 |
| BP | GO:0070059 | intrinsic apoptotic si3/74  | 0.001911472 | 0.008379466 | 3 |
| BP | GO:0070265 | necrotic cell death 3/74    | 0.001911472 | 0.008379466 | 3 |
| BP | GO:1902686 | mitochondrial outer 3/74    | 0.001911472 | 0.008379466 | 3 |
| BP | GO:0042770 | signal transduction i4/74   | 0.001926312 | 0.008423518 | 4 |
| BP | GO:0032496 | response to lipopoly6/74    | 0.001968238 | 0.008571659 | 6 |

|    |            |                            |             |             |   |
|----|------------|----------------------------|-------------|-------------|---|
| BP | GO:0006766 | vitamin metabolic p4/74    | 0.001979694 | 0.008571659 | 4 |
| BP | GO:0007006 | mitochondrial mem4/74      | 0.001979694 | 0.008571659 | 4 |
| BP | GO:0046683 | response to organo4/74     | 0.001979694 | 0.008571659 | 4 |
| BP | GO:0000097 | sulfur amino acid bi2/74   | 0.002028101 | 0.008632418 | 2 |
| BP | GO:0006750 | glutathione biosyntl2/74   | 0.002028101 | 0.008632418 | 2 |
| BP | GO:0009070 | serine family amino 2/74   | 0.002028101 | 0.008632418 | 2 |
| BP | GO:0051709 | regulation of killing 2/74 | 0.002028101 | 0.008632418 | 2 |
| BP | GO:0061687 | detoxification of ino2/74  | 0.002028101 | 0.008632418 | 2 |
| BP | GO:0072673 | lamellipodium morç2/74     | 0.002028101 | 0.008632418 | 2 |
| BP | GO:0097501 | stress response to n2/74   | 0.002028101 | 0.008632418 | 2 |
| BP | GO:0032147 | activation of proteir6/74  | 0.002059682 | 0.008745661 | 6 |
| BP | GO:0071902 | positive regulation c6/74  | 0.002090867 | 0.008805725 | 6 |
| BP | GO:0035794 | positive regulation c3/74  | 0.002093864 | 0.008805725 | 3 |
| BP | GO:1901607 | alpha-amino acid b3/74     | 0.002093864 | 0.008805725 | 3 |
| BP | GO:1903672 | positive regulation c3/74  | 0.002093864 | 0.008805725 | 3 |
| BP | GO:0010594 | regulation of endotl5/74   | 0.002153347 | 0.009034267 | 5 |
| BP | GO:1904951 | positive regulation c7/74  | 0.002177391 | 0.00911339  | 7 |
| BP | GO:0051187 | cofactor catabolic p3/74   | 0.002188977 | 0.009119839 | 3 |
| BP | GO:0009743 | response to carboh5/74     | 0.002194495 | 0.009119839 | 5 |
| BP | GO:1904018 | positive regulation c5/74  | 0.002194495 | 0.009119839 | 5 |
| BP | GO:0007586 | digestion 4/74             | 0.002262044 | 0.009347122 | 4 |
| BP | GO:0060749 | mammary gland alv2/74      | 0.002275772 | 0.009347122 | 2 |
| BP | GO:0061377 | mammary gland lok2/74      | 0.002275772 | 0.009347122 | 2 |
| BP | GO:0070233 | negative regulation 2/74   | 0.002275772 | 0.009347122 | 2 |
| BP | GO:1902165 | regulation of intrins2/74  | 0.002275772 | 0.009347122 | 2 |
| BP | GO:1902108 | regulation of mitoccl3/74  | 0.002286734 | 0.009348459 | 3 |
| BP | GO:1905207 | regulation of cardio3/74   | 0.002286734 | 0.009348459 | 3 |
| BP | GO:0048738 | cardiac muscle tissu5/74   | 0.002321389 | 0.009446197 | 5 |
| BP | GO:0097305 | response to alcohol 5/74   | 0.002321389 | 0.009446197 | 5 |
| BP | GO:0042108 | positive regulation c3/74  | 0.002387161 | 0.009649827 | 3 |
| BP | GO:0048662 | negative regulation 3/74   | 0.002387161 | 0.009649827 | 3 |
| BP | GO:0002237 | response to molecu6/74     | 0.002387899 | 0.009649827 | 6 |
| BP | GO:0006469 | negative regulation 5/74   | 0.002408905 | 0.009712387 | 5 |
| BP | GO:0002292 | T cell differentiation3/74 | 0.002490284 | 0.009926659 | 3 |
| BP | GO:0016239 | positive regulation c3/74  | 0.002490284 | 0.009926659 | 3 |
| BP | GO:0019915 | lipid storage 3/74         | 0.002490284 | 0.009926659 | 3 |
| BP | GO:0050891 | multicellular organis3/74  | 0.002490284 | 0.009926659 | 3 |
| BP | GO:0071230 | cellular response to 3/74  | 0.002490284 | 0.009926659 | 3 |
| BP | GO:0007050 | cell cycle arrest 5/74     | 0.002498801 | 0.009938075 | 5 |
| BP | GO:0019184 | nonribosomal pepti2/74     | 0.002537    | 0.009954864 | 2 |
| BP | GO:0032095 | regulation of respor2/74   | 0.002537    | 0.009954864 | 2 |
| BP | GO:0034138 | toll-like receptor 3 c2/74 | 0.002537    | 0.009954864 | 2 |
| BP | GO:0060252 | positive regulation c2/74  | 0.002537    | 0.009954864 | 2 |
| BP | GO:0071243 | cellular response to 2/74  | 0.002537    | 0.009954864 | 2 |
| BP | GO:1902644 | tertiary alcohol metç2/74  | 0.002537    | 0.009954864 | 2 |
| BP | GO:0051607 | defense response tc5/74    | 0.002544654 | 0.009962658 | 5 |
| BP | GO:0007612 | learning 4/74              | 0.002636139 | 0.010283065 | 4 |
| BP | GO:0050663 | cytokine secretion 5/74    | 0.002638191 | 0.010283065 | 5 |
| BP | GO:0051260 | protein homooligon6/74     | 0.002677731 | 0.010414091 | 6 |
| BP | GO:0042542 | response to hydrog4/74     | 0.002702367 | 0.010463603 | 4 |
| BP | GO:0045834 | positive regulation c4/74  | 0.002702367 | 0.010463603 | 4 |
| BP | GO:0002262 | myeloid cell homeo4/74     | 0.002769728 | 0.010675227 | 4 |
| BP | GO:0071236 | cellular response to 4/74  | 0.002769728 | 0.010675227 | 4 |
| BP | GO:0006071 | glycerol metabolic ç2/74   | 0.002811676 | 0.010675227 | 2 |
| BP | GO:0016137 | glycoside metabolic2/74    | 0.002811676 | 0.010675227 | 2 |
| BP | GO:0034393 | positive regulation c2/74  | 0.002811676 | 0.010675227 | 2 |
| BP | GO:0042535 | positive regulation c2/74  | 0.002811676 | 0.010675227 | 2 |
| BP | GO:0071636 | positive regulation c2/74  | 0.002811676 | 0.010675227 | 2 |

|    |            |                                              |             |             |   |
|----|------------|----------------------------------------------|-------------|-------------|---|
| BP | GO:1903204 | negative regulation 2/74                     | 0.002811676 | 0.010675227 | 2 |
| BP | GO:1903599 | positive regulation c2/74                    | 0.002811676 | 0.010675227 | 2 |
| BP | GO:0061041 | regulation of wound healing 4/74             | 0.002838232 | 0.010752831 | 4 |
| BP | GO:0051155 | positive regulation c3/74                    | 0.002930206 | 0.011077404 | 3 |
| BP | GO:0045862 | positive regulation c6/74                    | 0.002952385 | 0.011137299 | 6 |
| BP | GO:0006090 | pyruvate metabolic process 4/74              | 0.00297871  | 0.011212547 | 4 |
| BP | GO:0016049 | cell growth 7/74                             | 0.00303541  | 0.011401563 | 7 |
| BP | GO:0021537 | telencephalon development 5/74               | 0.00309028  | 0.011471437 | 5 |
| BP | GO:0071560 | cellular response to stress 5/74             | 0.00309028  | 0.011471437 | 5 |
| BP | GO:0006907 | pinocytosis 2/74                             | 0.003099692 | 0.011471437 | 2 |
| BP | GO:0035162 | embryonic hemopoiesis 2/74                   | 0.003099692 | 0.011471437 | 2 |
| BP | GO:0051900 | regulation of mitochondrial translation 2/74 | 0.003099692 | 0.011471437 | 2 |
| BP | GO:0055093 | response to hypoxia 2/74                     | 0.003099692 | 0.011471437 | 2 |
| BP | GO:2000269 | regulation of fibroblast proliferation 2/74  | 0.003099692 | 0.011471437 | 2 |
| BP | GO:0010951 | negative regulation 5/74                     | 0.003143755 | 0.011598266 | 5 |
| BP | GO:0009064 | glutamine family amino acid transport 3/74   | 0.003166952 | 0.011598266 | 3 |
| BP | GO:0030104 | water homeostasis 3/74                       | 0.003166952 | 0.011598266 | 3 |
| BP | GO:0031670 | cellular response to stress 3/74             | 0.003166952 | 0.011598266 | 3 |
| BP | GO:0043367 | CD4-positive, alpha 3/74                     | 0.003166952 | 0.011598266 | 3 |
| BP | GO:0046173 | polyol biosynthetic process 3/74             | 0.0032896   | 0.01199745  | 3 |
| BP | GO:0150076 | neuroinflammatory response 3/74              | 0.0032896   | 0.01199745  | 3 |
| BP | GO:0072503 | cellular divalent ion transport 7/74         | 0.003360083 | 0.012125269 | 7 |
| BP | GO:0002052 | positive regulation c2/74                    | 0.003400942 | 0.012125269 | 2 |
| BP | GO:0006925 | inflammatory cell activation 2/74            | 0.003400942 | 0.012125269 | 2 |
| BP | GO:0010869 | regulation of receptor activity 2/74         | 0.003400942 | 0.012125269 | 2 |
| BP | GO:0051000 | positive regulation c2/74                    | 0.003400942 | 0.012125269 | 2 |
| BP | GO:0060547 | negative regulation 2/74                     | 0.003400942 | 0.012125269 | 2 |
| BP | GO:0090312 | positive regulation c2/74                    | 0.003400942 | 0.012125269 | 2 |
| BP | GO:1903589 | positive regulation c2/74                    | 0.003400942 | 0.012125269 | 2 |
| BP | GO:0000422 | autophagy of mitochondrion 3/74              | 0.003415128 | 0.012125269 | 3 |
| BP | GO:0042310 | vasoconstriction 3/74                        | 0.003415128 | 0.012125269 | 3 |
| BP | GO:0045454 | cell redox homeostasis 3/74                  | 0.003415128 | 0.012125269 | 3 |
| BP | GO:0046902 | regulation of mitochondrial translation 3/74 | 0.003415128 | 0.012125269 | 3 |
| BP | GO:0061726 | mitochondrion disassembly 3/74               | 0.003415128 | 0.012125269 | 3 |
| BP | GO:0071559 | response to transformation 5/74              | 0.003421214 | 0.012125269 | 5 |
| BP | GO:0007611 | learning or memory 5/74                      | 0.003478755 | 0.012304398 | 5 |
| BP | GO:0033673 | negative regulation 5/74                     | 0.003536991 | 0.012433527 | 5 |
| BP | GO:0006110 | regulation of glycolysis 3/74                | 0.003543555 | 0.012433527 | 3 |
| BP | GO:0031397 | negative regulation 3/74                     | 0.003543555 | 0.012433527 | 3 |
| BP | GO:0061418 | regulation of transcription 3/74             | 0.003543555 | 0.012433527 | 3 |
| BP | GO:0043406 | positive regulation c5/74                    | 0.003595926 | 0.012592151 | 5 |
| BP | GO:0008306 | associative learning 3/74                    | 0.003674904 | 0.012781091 | 3 |
| BP | GO:0019400 | alditol metabolic process 2/74               | 0.003715318 | 0.012781091 | 2 |
| BP | GO:0030810 | positive regulation c2/74                    | 0.003715318 | 0.012781091 | 2 |
| BP | GO:0045821 | positive regulation c2/74                    | 0.003715318 | 0.012781091 | 2 |
| BP | GO:0051882 | mitochondrial depolarization 2/74            | 0.003715318 | 0.012781091 | 2 |
| BP | GO:0071294 | cellular response to stress 2/74             | 0.003715318 | 0.012781091 | 2 |
| BP | GO:0072337 | modified amino acid metabolism 2/74          | 0.003715318 | 0.012781091 | 2 |
| BP | GO:1900373 | positive regulation c2/74                    | 0.003715318 | 0.012781091 | 2 |
| BP | GO:1902254 | negative regulation 2/74                     | 0.003715318 | 0.012781091 | 2 |
| BP | GO:0010466 | negative regulation 5/74                     | 0.003838751 | 0.013179923 | 5 |
| BP | GO:0009110 | vitamin biosynthetic process 2/74            | 0.004042715 | 0.0138262   | 2 |
| BP | GO:0044346 | fibroblast apoptotic process 2/74            | 0.004042715 | 0.0138262   | 2 |
| BP | GO:0048708 | astrocyte differentiation 3/74               | 0.004086682 | 0.013922397 | 3 |
| BP | GO:2001021 | negative regulation 3/74                     | 0.004086682 | 0.013922397 | 3 |
| BP | GO:0072331 | signal transduction 15/74                    | 0.004158577 | 0.014139925 | 5 |
| BP | GO:1901653 | cellular response to stress 6/74             | 0.004213402 | 0.014272072 | 6 |
| BP | GO:0006094 | gluconeogenesis 3/74                         | 0.004229917 | 0.014272072 | 3 |

|    |            |                            |             |             |   |
|----|------------|----------------------------|-------------|-------------|---|
| BP | GO:0090049 | regulation of cell mi3/74  | 0.004229917 | 0.014272072 | 3 |
| BP | GO:0097581 | lamellipodium orga13/74    | 0.004229917 | 0.014272072 | 3 |
| BP | GO:0048145 | regulation of fibrobl3/74  | 0.004376173 | 0.014648099 | 3 |
| BP | GO:0019430 | removal of superoxi2/74    | 0.004383027 | 0.014648099 | 2 |
| BP | GO:0032104 | regulation of respor2/74   | 0.004383027 | 0.014648099 | 2 |
| BP | GO:0032107 | regulation of respor2/74   | 0.004383027 | 0.014648099 | 2 |
| BP | GO:0061050 | regulation of cell gr2/74  | 0.004383027 | 0.014648099 | 2 |
| BP | GO:0010507 | negative regulation 3/74   | 0.004525467 | 0.01500999  | 3 |
| BP | GO:0046889 | positive regulation c3/74  | 0.004525467 | 0.01500999  | 3 |
| BP | GO:0048144 | fibroblast proliferati3/74 | 0.004525467 | 0.01500999  | 3 |
| BP | GO:0097756 | negative regulation 3/74   | 0.004525467 | 0.01500999  | 3 |
| BP | GO:0021543 | pallium developmer4/74     | 0.004557667 | 0.015059959 | 4 |
| BP | GO:0030307 | positive regulation c4/74  | 0.004557667 | 0.015059959 | 4 |
| BP | GO:0043542 | endothelial cell migl5/74  | 0.004637804 | 0.015296007 | 5 |
| BP | GO:0019319 | hexose biosynthetic 3/74   | 0.004677818 | 0.015399087 | 3 |
| BP | GO:0032800 | receptor biosyntheti2/74   | 0.00473615  | 0.015475193 | 2 |
| BP | GO:1900739 | regulation of proteii2/74  | 0.00473615  | 0.015475193 | 2 |
| BP | GO:1900740 | positive regulation c2/74  | 0.00473615  | 0.015475193 | 2 |
| BP | GO:1903203 | regulation of oxidat2/74   | 0.00473615  | 0.015475193 | 2 |
| BP | GO:0070542 | response to fatty ac3/74   | 0.004833245 | 0.015763146 | 3 |
| BP | GO:0001659 | temperature homec4/74      | 0.004949943 | 0.01611385  | 4 |
| BP | GO:0043470 | regulation of carbo13/74   | 0.004991764 | 0.016219955 | 3 |
| BP | GO:2001252 | positive regulation c4/74  | 0.005051444 | 0.016352206 | 4 |
| BP | GO:0036475 | neuron death in resl2/74   | 0.00510198  | 0.016352206 | 2 |
| BP | GO:0046885 | regulation of hormc2/74    | 0.00510198  | 0.016352206 | 2 |
| BP | GO:0048143 | astrocyte activation 2/74  | 0.00510198  | 0.016352206 | 2 |
| BP | GO:0071280 | cellular response to 2/74  | 0.00510198  | 0.016352206 | 2 |
| BP | GO:0071450 | cellular response to 2/74  | 0.00510198  | 0.016352206 | 2 |
| BP | GO:0071451 | cellular response to 2/74  | 0.00510198  | 0.016352206 | 2 |
| BP | GO:0006767 | water-soluble vitam3/74    | 0.005153393 | 0.016352206 | 3 |
| BP | GO:0009060 | aerobic respiration 3/74   | 0.005153393 | 0.016352206 | 3 |
| BP | GO:0009791 | post-embryonic dev3/74     | 0.005153393 | 0.016352206 | 3 |
| BP | GO:1900407 | regulation of cellula3/74  | 0.005153393 | 0.016352206 | 3 |
| BP | GO:1903321 | negative regulation 3/74   | 0.005153393 | 0.016352206 | 3 |
| BP | GO:1904035 | regulation of epithe3/74   | 0.005153393 | 0.016352206 | 3 |
| BP | GO:0022407 | regulation of cell-c6/74   | 0.005189375 | 0.016436711 | 6 |
| BP | GO:1903532 | positive regulation c6/74  | 0.005251544 | 0.016566497 | 6 |
| BP | GO:0050796 | regulation of insulin4/74  | 0.005258623 | 0.016566497 | 4 |
| BP | GO:0090316 | positive regulation c4/74  | 0.005258623 | 0.016566497 | 4 |
| BP | GO:0055013 | cardiac muscle cell c3/74  | 0.005318149 | 0.016724054 | 3 |
| BP | GO:0001959 | regulation of cytokiri4/74 | 0.005364318 | 0.016839119 | 4 |
| BP | GO:0034976 | response to endopl5/74     | 0.005468604 | 0.01694885  | 5 |
| BP | GO:0051348 | negative regulation 5/74   | 0.005468604 | 0.01694885  | 5 |
| BP | GO:0009065 | glutamine family arr2/74   | 0.005480413 | 0.01694885  | 2 |
| BP | GO:0033137 | negative regulation 2/74   | 0.005480413 | 0.01694885  | 2 |
| BP | GO:0036296 | response to increas2/74    | 0.005480413 | 0.01694885  | 2 |
| BP | GO:1902745 | positive regulation c2/74  | 0.005480413 | 0.01694885  | 2 |
| BP | GO:0031058 | positive regulation c3/74  | 0.005486048 | 0.01694885  | 3 |
| BP | GO:0032651 | regulation of interle3/74  | 0.005486048 | 0.01694885  | 3 |
| BP | GO:0046849 | bone remodeling 3/74       | 0.005486048 | 0.01694885  | 3 |
| BP | GO:0010821 | regulation of mitoc14/74   | 0.005579964 | 0.017178615 | 4 |
| BP | GO:1903034 | regulation of respor4/74   | 0.005579964 | 0.017178615 | 4 |
| BP | GO:0046364 | monosaccharide bic3/74     | 0.005657107 | 0.017294955 | 3 |
| BP | GO:0051899 | membrane depolari3/74      | 0.005657107 | 0.017294955 | 3 |
| BP | GO:0060333 | interferon-gamma- 3/74     | 0.005657107 | 0.017294955 | 3 |
| BP | GO:1904063 | negative regulation 3/74   | 0.005657107 | 0.017294955 | 3 |
| BP | GO:0071346 | cellular response to 4/74  | 0.005689931 | 0.017335008 | 4 |
| BP | GO:1901796 | regulation of signal 4/74  | 0.005689931 | 0.017335008 | 4 |

|    |            |                           |             |             |   |
|----|------------|---------------------------|-------------|-------------|---|
| BP | GO:0002793 | positive regulation c5/74 | 0.005712356 | 0.01737322  | 5 |
| BP | GO:0035710 | CD4-positive, alpha 3/74  | 0.005831342 | 0.017612985 | 3 |
| BP | GO:0000303 | response to supero2/74    | 0.005871346 | 0.017612985 | 2 |
| BP | GO:0009435 | NAD biosynthetic pi2/74   | 0.005871346 | 0.017612985 | 2 |
| BP | GO:0010575 | positive regulation c2/74 | 0.005871346 | 0.017612985 | 2 |
| BP | GO:0033032 | regulation of myelo2/74   | 0.005871346 | 0.017612985 | 2 |
| BP | GO:0044550 | secondary metaboli2/74    | 0.005871346 | 0.017612985 | 2 |
| BP | GO:0070229 | negative regulation 2/74  | 0.005871346 | 0.017612985 | 2 |
| BP | GO:2000727 | positive regulation c2/74 | 0.005871346 | 0.017612985 | 2 |
| BP | GO:0008217 | regulation of blood 4/74  | 0.005914195 | 0.017711297 | 4 |
| BP | GO:0033273 | response to vitamin 3/74  | 0.006008768 | 0.01790302  | 3 |
| BP | GO:0035249 | synaptic transmissio3/74  | 0.006008768 | 0.01790302  | 3 |
| BP | GO:0036473 | cell death in respon3/74  | 0.006008768 | 0.01790302  | 3 |
| BP | GO:0003015 | heart process 5/74        | 0.006049192 | 0.017962572 | 5 |
| BP | GO:0090287 | regulation of cellula5/74 | 0.006049192 | 0.017962572 | 5 |
| BP | GO:0030099 | myeloid cell differer6/74 | 0.006110523 | 0.01811409  | 6 |
| BP | GO:0051146 | striated muscle cell 5/74 | 0.006135544 | 0.018157644 | 5 |
| BP | GO:0000305 | response to oxygen 2/74   | 0.006274678 | 0.018414396 | 2 |
| BP | GO:0001782 | B cell homeostasis 2/74   | 0.006274678 | 0.018414396 | 2 |
| BP | GO:0001844 | protein insertion int2/74 | 0.006274678 | 0.018414396 | 2 |
| BP | GO:0043372 | positive regulation c2/74 | 0.006274678 | 0.018414396 | 2 |
| BP | GO:0090200 | positive regulation c2/74 | 0.006274678 | 0.018414396 | 2 |
| BP | GO:0048511 | rhythmic process 5/74     | 0.006310853 | 0.018489692 | 5 |
| BP | GO:0055006 | cardiac cell develop3/74  | 0.006373254 | 0.018641448 | 3 |
| BP | GO:0090277 | positive regulation c3/74 | 0.006560344 | 0.019156801 | 3 |
| BP | GO:0001963 | synaptic transmissio2/74  | 0.006690306 | 0.019375375 | 2 |
| BP | GO:0006691 | leukotriene metabol2/74   | 0.006690306 | 0.019375375 | 2 |
| BP | GO:0044319 | wound healing, spre2/74   | 0.006690306 | 0.019375375 | 2 |
| BP | GO:0090505 | epiboly involved in 2/74  | 0.006690306 | 0.019375375 | 2 |
| BP | GO:1902253 | regulation of intrins2/74 | 0.006690306 | 0.019375375 | 2 |
| BP | GO:0120162 | positive regulation c3/74 | 0.006750684 | 0.01948603  | 3 |
| BP | GO:1902882 | regulation of respor3/74  | 0.006750684 | 0.01948603  | 3 |
| BP | GO:0070372 | regulation of ERK1 ε5/74  | 0.006764525 | 0.019493972 | 5 |
| BP | GO:0060759 | regulation of respor4/74  | 0.006870176 | 0.019766034 | 4 |
| BP | GO:0002042 | cell migration involv3/74 | 0.006944288 | 0.019914075 | 3 |
| BP | GO:0045807 | positive regulation c3/74 | 0.006944288 | 0.019914075 | 3 |
| BP | GO:0019359 | nicotinamide nuclec2/74   | 0.007118128 | 0.020092313 | 2 |
| BP | GO:0019363 | pyridine nucleotide 2/74  | 0.007118128 | 0.020092313 | 2 |
| BP | GO:0046685 | response to arsenic 2/74  | 0.007118128 | 0.020092313 | 2 |
| BP | GO:0046949 | fatty-acyl-CoA bios2/74   | 0.007118128 | 0.020092313 | 2 |
| BP | GO:0051968 | positive regulation c2/74 | 0.007118128 | 0.020092313 | 2 |
| BP | GO:0090504 | epiboly 2/74              | 0.007118128 | 0.020092313 | 2 |
| BP | GO:1901661 | quinone metabolic 2/74    | 0.007118128 | 0.020092313 | 2 |
| BP | GO:0006164 | purine nucleotide bi4/74  | 0.007124224 | 0.020092313 | 4 |
| BP | GO:0007565 | female pregnancy 4/74     | 0.007124224 | 0.020092313 | 4 |
| BP | GO:0043648 | dicarboxylic acid me3/74  | 0.00714117  | 0.020092313 | 3 |
| BP | GO:0070301 | cellular response to 3/74 | 0.00714117  | 0.020092313 | 3 |
| BP | GO:0046034 | ATP metabolic proc5/74    | 0.007143599 | 0.020092313 | 5 |
| BP | GO:0007219 | Notch signaling pat4/74   | 0.007253549 | 0.020368971 | 4 |
| BP | GO:0022600 | digestive system prc3/74  | 0.007341344 | 0.020582631 | 3 |
| BP | GO:0042391 | regulation of memb6/74    | 0.007463957 | 0.020695092 | 6 |
| BP | GO:0032611 | interleukin-1 beta p3/74  | 0.007544821 | 0.020695092 | 3 |
| BP | GO:0046632 | alpha-beta T cell di13/74 | 0.007544821 | 0.020695092 | 3 |
| BP | GO:0048259 | regulation of recept3/74  | 0.007544821 | 0.020695092 | 3 |
| BP | GO:1903008 | organelle disassembk3/74  | 0.007544821 | 0.020695092 | 3 |
| BP | GO:0016242 | negative regulation 2/74  | 0.007558046 | 0.020695092 | 2 |
| BP | GO:0019362 | pyridine nucleotide 2/74  | 0.007558046 | 0.020695092 | 2 |
| BP | GO:0032691 | negative regulation 2/74  | 0.007558046 | 0.020695092 | 2 |



|    |            |                       |        |             |             |   |
|----|------------|-----------------------|--------|-------------|-------------|---|
| BP | GO:0033028 | myeloid cell apopto   | 2/74   | 0.007558046 | 0.020695092 | 2 |
| BP | GO:0042755 | eating behavior       | 2/74   | 0.007558046 | 0.020695092 | 2 |
| BP | GO:0045736 | negative regulation   | 2/74   | 0.007558046 | 0.020695092 | 2 |
| BP | GO:0046496 | nicotinamide nuclec   | 2/74   | 0.007558046 | 0.020695092 | 2 |
| BP | GO:0070232 | regulation of T cell  | 2/74   | 0.007558046 | 0.020695092 | 2 |
| BP | GO:1901797 | negative regulation   | 2/74   | 0.007558046 | 0.020695092 | 2 |
| BP | GO:1902692 | regulation of neuro   | 2/74   | 0.007558046 | 0.020695092 | 2 |
| BP | GO:0000079 | regulation of cyclin  | -3/74  | 0.007751616 | 0.021192106 | 3 |
| BP | GO:0010952 | positive regulation   | c4/74  | 0.007786368 | 0.021254061 | 4 |
| BP | GO:0016052 | carbohydrate catab    | 4/74   | 0.00792349  | 0.021431756 | 4 |
| BP | GO:0031099 | regeneration          | 4/74   | 0.00792349  | 0.021431756 | 4 |
| BP | GO:0018958 | phenol-containing     | c3/74  | 0.007961739 | 0.021431756 | 3 |
| BP | GO:0032652 | regulation of inter   | le3/74 | 0.007961739 | 0.021431756 | 3 |
| BP | GO:1905269 | positive regulation   | c3/74  | 0.007961739 | 0.021431756 | 3 |
| BP | GO:0006536 | glutamate metaboli    | 2/74   | 0.008009958 | 0.021431756 | 2 |
| BP | GO:0010574 | regulation of vascul  | 2/74   | 0.008009958 | 0.021431756 | 2 |
| BP | GO:0010922 | positive regulation   | c2/74  | 0.008009958 | 0.021431756 | 2 |
| BP | GO:0032148 | activation of protei  | r2/74  | 0.008009958 | 0.021431756 | 2 |
| BP | GO:0042533 | tumor necrosis fact   | c2/74  | 0.008009958 | 0.021431756 | 2 |
| BP | GO:0042534 | regulation of tumor   | 2/74   | 0.008009958 | 0.021431756 | 2 |
| BP | GO:0043276 | anoikis               | 2/74   | 0.008009958 | 0.021431756 | 2 |
| BP | GO:1904030 | negative regulation   | 2/74   | 0.008009958 | 0.021431756 | 2 |
| BP | GO:0006109 | regulation of carbo   | 4/74   | 0.008062194 | 0.021506053 | 4 |
| BP | GO:0007179 | transforming growth   | 4/74   | 0.008062194 | 0.021506053 | 4 |
| BP | GO:0051235 | maintenance of loc    | e5/74  | 0.00826245  | 0.022006845 | 5 |
| BP | GO:0006637 | acyl-CoA metabolic    | 3/74   | 0.008392023 | 0.022217309 | 3 |
| BP | GO:0006641 | triglyceride metabo   | 3/74   | 0.008392023 | 0.022217309 | 3 |
| BP | GO:0008593 | regulation of Notch   | 3/74   | 0.008392023 | 0.022217309 | 3 |
| BP | GO:0035383 | thioester metabolic   | 3/74   | 0.008392023 | 0.022217309 | 3 |
| BP | GO:0051354 | negative regulation   | 2/74   | 0.008473766 | 0.022303117 | 2 |
| BP | GO:0060251 | regulation of glial   | c2/74  | 0.008473766 | 0.022303117 | 2 |
| BP | GO:1901030 | positive regulation   | c2/74  | 0.008473766 | 0.022303117 | 2 |
| BP | GO:0070371 | ERK1 and ERK2 casc    | 5/74   | 0.008478238 | 0.022303117 | 5 |
| BP | GO:0009746 | response to hexose    | 4/74   | 0.008487872 | 0.022303117 | 4 |
| BP | GO:0002286 | T cell activation inv | c3/74  | 0.008612206 | 0.022562373 | 3 |
| BP | GO:1904029 | regulation of cyclin  | -3/74  | 0.008612206 | 0.022562373 | 3 |
| BP | GO:0002573 | myeloid leukocyte     | c4/74  | 0.008779701 | 0.022898798 | 4 |
| BP | GO:0006006 | glucose metabolic     | c4/74  | 0.008779701 | 0.022898798 | 4 |
| BP | GO:0031396 | regulation of protei  | n4/74  | 0.008779701 | 0.022898798 | 4 |
| BP | GO:0030330 | DNA damage respo      | 3/74   | 0.008835766 | 0.022966499 | 3 |
| BP | GO:0071222 | cellular response to  | 4/74   | 0.00892805  | 0.022966499 | 4 |
| BP | GO:0072522 | purine-containing     | c4/74  | 0.00892805  | 0.022966499 | 4 |
| BP | GO:0006882 | cellular zinc ion hon | 2/74   | 0.008949371 | 0.022966499 | 2 |
| BP | GO:0010573 | vascular endothelial  | 2/74   | 0.008949371 | 0.022966499 | 2 |
| BP | GO:0030224 | monocyte differenti   | 2/74   | 0.008949371 | 0.022966499 | 2 |
| BP | GO:0034390 | smooth muscle cell    | 2/74   | 0.008949371 | 0.022966499 | 2 |
| BP | GO:0034391 | regulation of smoot   | 2/74   | 0.008949371 | 0.022966499 | 2 |
| BP | GO:0090322 | regulation of super   | c2/74  | 0.008949371 | 0.022966499 | 2 |
| BP | GO:1903131 | mononuclear cell di   | 2/74   | 0.008949371 | 0.022966499 | 2 |
| BP | GO:2000516 | positive regulation   | c2/74  | 0.008949371 | 0.022966499 | 2 |
| BP | GO:0002526 | acute inflammatory    | 3/74   | 0.009062712 | 0.02322346  | 3 |
| BP | GO:0009615 | response to virus     | 5/74   | 0.009149073 | 0.023410637 | 5 |
| BP | GO:0030073 | insulin secretion     | 4/74   | 0.009229652 | 0.023548268 | 4 |
| BP | GO:0034284 | response to monos     | c4/74  | 0.009229652 | 0.023548268 | 4 |
| BP | GO:1903829 | positive regulation   | c5/74  | 0.009264347 | 0.023602531 | 5 |
| BP | GO:0051149 | positive regulation   | c3/74  | 0.009293055 | 0.023641408 | 3 |
| BP | GO:1901215 | negative regulation   | 4/74   | 0.009382919 | 0.02383431  | 4 |
| BP | GO:0042307 | positive regulation   | c2/74  | 0.009436674 | 0.02383431  | 2 |

|    |            |                             |      |             |             |   |
|----|------------|-----------------------------|------|-------------|-------------|---|
| BP | GO:0045730 | respiratory burst           | 2/74 | 0.009436674 | 0.02383431  | 2 |
| BP | GO:0051193 | regulation of cofactor      | 2/74 | 0.009436674 | 0.02383431  | 2 |
| BP | GO:0071542 | dopaminergic neuron         | 2/74 | 0.009436674 | 0.02383431  | 2 |
| BP | GO:0043523 | regulation of neuronal      | 4/74 | 0.009694421 | 0.024415144 | 4 |
| BP | GO:0050707 | regulation of cytokine      | 4/74 | 0.009694421 | 0.024415144 | 4 |
| BP | GO:0031623 | receptor internalization    | 3/74 | 0.009763977 | 0.02455514  | 3 |
| BP | GO:0003298 | physiological muscle        | 2/74 | 0.009935578 | 0.024738952 | 2 |
| BP | GO:0003301 | physiological cardiac       | 2/74 | 0.009935578 | 0.024738952 | 2 |
| BP | GO:0010831 | positive regulation of      | 2/74 | 0.009935578 | 0.024738952 | 2 |
| BP | GO:0032094 | response to food            | 2/74 | 0.009935578 | 0.024738952 | 2 |
| BP | GO:0032350 | regulation of hormone       | 2/74 | 0.009935578 | 0.024738952 | 2 |
| BP | GO:0055069 | zinc ion homeostasis        | 2/74 | 0.009935578 | 0.024738952 | 2 |
| BP | GO:0061049 | cell growth involvement     | 2/74 | 0.009935578 | 0.024738952 | 2 |
| BP | GO:0042303 | molting cycle               | 3/74 | 0.010004574 | 0.024790251 | 3 |
| BP | GO:0042633 | hair cycle                  | 3/74 | 0.010004574 | 0.024790251 | 3 |
| BP | GO:0071219 | cellular response to        | 4/74 | 0.01001259  | 0.024790251 | 4 |
| BP | GO:1903531 | negative regulation of      | 4/74 | 0.01001259  | 0.024790251 | 4 |
| BP | GO:0008202 | steroid metabolic process   | 5/74 | 0.010099548 | 0.024970384 | 5 |
| BP | GO:0006096 | glycolytic process          | 3/74 | 0.010248609 | 0.025303336 | 3 |
| BP | GO:0045732 | positive regulation of      | 4/74 | 0.01033748  | 0.025486958 | 4 |
| BP | GO:0008207 | C21-steroid hormone         | 2/74 | 0.010445986 | 0.025500307 | 2 |
| BP | GO:0032692 | negative regulation of      | 2/74 | 0.010445986 | 0.025500307 | 2 |
| BP | GO:0042417 | dopamine metabolism         | 2/74 | 0.010445986 | 0.025500307 | 2 |
| BP | GO:0051180 | vitamin transport           | 2/74 | 0.010445986 | 0.025500307 | 2 |
| BP | GO:1902042 | negative regulation of      | 2/74 | 0.010445986 | 0.025500307 | 2 |
| BP | GO:1904591 | positive regulation of      | 2/74 | 0.010445986 | 0.025500307 | 2 |
| BP | GO:2000648 | positive regulation of      | 2/74 | 0.010445986 | 0.025500307 | 2 |
| BP | GO:0006757 | ATP generation from         | 3/74 | 0.01049609  | 0.025500307 | 3 |
| BP | GO:0042035 | regulation of cytokine      | 3/74 | 0.01049609  | 0.025500307 | 3 |
| BP | GO:0042752 | regulation of circadian     | 3/74 | 0.01049609  | 0.025500307 | 3 |
| BP | GO:0070374 | positive regulation of      | 4/74 | 0.010502462 | 0.025500307 | 4 |
| BP | GO:0032869 | cellular response to        | 4/74 | 0.010669144 | 0.025869286 | 4 |
| BP | GO:0032612 | interleukin-1 production    | 3/74 | 0.010747026 | 0.025986438 | 3 |
| BP | GO:0032963 | collagen metabolic process  | 3/74 | 0.010747026 | 0.025986438 | 3 |
| BP | GO:0044242 | cellular lipid catabolism   | 4/74 | 0.010837533 | 0.026169288 | 4 |
| BP | GO:0045124 | regulation of bone          | 2/74 | 0.010967801 | 0.026375157 | 2 |
| BP | GO:0071470 | cellular response to        | 2/74 | 0.010967801 | 0.026375157 | 2 |
| BP | GO:1900371 | regulation of purine        | 2/74 | 0.010967801 | 0.026375157 | 2 |
| BP | GO:0021782 | glial cell development      | 3/74 | 0.011001427 | 0.026381157 | 3 |
| BP | GO:1903039 | positive regulation of      | 4/74 | 0.011007634 | 0.026381157 | 4 |
| BP | GO:0003012 | muscle system process       | 6/74 | 0.011015318 | 0.026381157 | 6 |
| BP | GO:0002699 | positive regulation of      | 4/74 | 0.011179455 | 0.026737829 | 4 |
| BP | GO:0051153 | regulation of striated      | 3/74 | 0.0112593   | 0.026892207 | 3 |
| BP | GO:0019432 | triglyceride biosynthesis   | 2/74 | 0.011500928 | 0.027247197 | 2 |
| BP | GO:0030808 | regulation of nucleic       | 2/74 | 0.011500928 | 0.027247197 | 2 |
| BP | GO:0035337 | fatty-acyl-CoA metabolism   | 2/74 | 0.011500928 | 0.027247197 | 2 |
| BP | GO:0045616 | regulation of keratin       | 2/74 | 0.011500928 | 0.027247197 | 2 |
| BP | GO:0140353 | lipid export from cell      | 2/74 | 0.011500928 | 0.027247197 | 2 |
| BP | GO:1905209 | positive regulation of      | 2/74 | 0.011500928 | 0.027247197 | 2 |
| BP | GO:0044706 | multi-multicellular         | 4/74 | 0.011705294 | 0.027694045 | 4 |
| BP | GO:0045444 | fat cell differentiation    | 4/74 | 0.011884054 | 0.028079189 | 4 |
| BP | GO:0010613 | positive regulation of      | 2/74 | 0.01204527  | 0.028345807 | 2 |
| BP | GO:0046688 | response to copper          | 2/74 | 0.01204527  | 0.028345807 | 2 |
| BP | GO:1903146 | regulation of autophagy     | 2/74 | 0.01204527  | 0.028345807 | 2 |
| BP | GO:0048638 | regulation of development   | 5/74 | 0.012200469 | 0.028672648 | 5 |
| BP | GO:0034765 | regulation of ion transport | 6/74 | 0.012235619 | 0.028716863 | 6 |
| BP | GO:0006692 | prostanoid metabolism       | 2/74 | 0.012600735 | 0.029108131 | 2 |
| BP | GO:0006693 | prostaglandin metabolism    | 2/74 | 0.012600735 | 0.029108131 | 2 |

|    |            |                            |             |             |   |
|----|------------|----------------------------|-------------|-------------|---|
| BP | GO:0008631 | intrinsic apoptotic si2/74 | 0.012600735 | 0.029108131 | 2 |
| BP | GO:0014742 | positive regulation c2/74  | 0.012600735 | 0.029108131 | 2 |
| BP | GO:0032459 | regulation of protei2/74   | 0.012600735 | 0.029108131 | 2 |
| BP | GO:0034198 | cellular response to 2/74  | 0.012600735 | 0.029108131 | 2 |
| BP | GO:0045746 | negative regulation 2/74   | 0.012600735 | 0.029108131 | 2 |
| BP | GO:0046460 | neutral lipid biosynt2/74  | 0.012600735 | 0.029108131 | 2 |
| BP | GO:0046463 | acylglycerol biosynt2/74   | 0.012600735 | 0.029108131 | 2 |
| BP | GO:0072348 | sulfur compound tr2/74     | 0.012600735 | 0.029108131 | 2 |
| BP | GO:0034101 | erythrocyte homeos3/74     | 0.012601032 | 0.029108131 | 3 |
| BP | GO:0046031 | ADP metabolic proc3/74     | 0.012601032 | 0.029108131 | 3 |
| BP | GO:0042089 | cytokine biosyntheti3/74   | 0.012879903 | 0.029713273 | 3 |
| BP | GO:0032388 | positive regulation c4/74  | 0.012993572 | 0.029936214 | 4 |
| BP | GO:0008637 | apoptotic mitochon3/74     | 0.013162298 | 0.030099606 | 3 |
| BP | GO:0042107 | cytokine metabolic j3/74   | 0.013162298 | 0.030099606 | 3 |
| BP | GO:0032965 | regulation of collag2/74   | 0.013167226 | 0.030099606 | 2 |
| BP | GO:0046189 | phenol-containing c2/74    | 0.013167226 | 0.030099606 | 2 |
| BP | GO:0090311 | regulation of protei2/74   | 0.013167226 | 0.030099606 | 2 |
| BP | GO:1901028 | regulation of mitoc2/74    | 0.013167226 | 0.030099606 | 2 |
| BP | GO:1903320 | regulation of protei4/74   | 0.013377631 | 0.030540866 | 4 |
| BP | GO:0031929 | TOR signaling 3/74         | 0.013448224 | 0.03062249  | 3 |
| BP | GO:2000134 | negative regulation 3/74   | 0.013448224 | 0.03062249  | 3 |
| BP | GO:0032309 | icosanoid secretion 2/74   | 0.013744651 | 0.031216601 | 2 |
| BP | GO:0051204 | protein insertion int2/74  | 0.013744651 | 0.031216601 | 2 |
| BP | GO:0042445 | hormone metabolic 4/74     | 0.013768876 | 0.031231269 | 4 |
| BP | GO:0048588 | developmental cell i4/74   | 0.013967206 | 0.031640307 | 4 |
| BP | GO:0046777 | protein autophosph4/74     | 0.01416735  | 0.032033206 | 4 |
| BP | GO:0050900 | leukocyte migration6/74    | 0.014177091 | 0.032033206 | 6 |
| BP | GO:0002576 | platelet degranulati3/74   | 0.014327245 | 0.032055671 | 3 |
| BP | GO:0001504 | neurotransmitter up2/74    | 0.014332916 | 0.032055671 | 2 |
| BP | GO:0045776 | negative regulation 2/74   | 0.014332916 | 0.032055671 | 2 |
| BP | GO:0050706 | regulation of interle2/74  | 0.014332916 | 0.032055671 | 2 |
| BP | GO:0051646 | mitochondrion loca2/74     | 0.014332916 | 0.032055671 | 2 |
| BP | GO:0060443 | mammary gland mc2/74       | 0.014332916 | 0.032055671 | 2 |
| BP | GO:1903587 | regulation of blood 2/74   | 0.014332916 | 0.032055671 | 2 |
| BP | GO:1990928 | response to amino c2/74    | 0.014332916 | 0.032055671 | 2 |
| BP | GO:0071216 | cellular response to 4/74  | 0.014369312 | 0.032096237 | 4 |
| BP | GO:0006639 | acylglycerol metab3/74     | 0.014627352 | 0.032631149 | 3 |
| BP | GO:0051048 | negative regulation 4/74   | 0.014778712 | 0.032927022 | 4 |
| BP | GO:0006638 | neutral lipid metab3/74    | 0.014931018 | 0.032934454 | 3 |
| BP | GO:0043500 | muscle adaptation 3/74     | 0.014931018 | 0.032934454 | 3 |
| BP | GO:0031952 | regulation of protei2/74   | 0.014931929 | 0.032934454 | 2 |
| BP | GO:0043370 | regulation of CD4-c2/74    | 0.014931929 | 0.032934454 | 2 |
| BP | GO:0046638 | positive regulation c2/74  | 0.014931929 | 0.032934454 | 2 |
| BP | GO:0070231 | T cell apoptotic pro2/74   | 0.014931929 | 0.032934454 | 2 |
| BP | GO:0090151 | establishment of prc2/74   | 0.014931929 | 0.032934454 | 2 |
| BP | GO:2000107 | negative regulation 2/74   | 0.014931929 | 0.032934454 | 2 |
| BP | GO:1902807 | negative regulation 3/74   | 0.015238248 | 0.033567964 | 3 |
| BP | GO:0030850 | prostate gland deve2/74    | 0.015541598 | 0.033870614 | 2 |
| BP | GO:0045806 | negative regulation 2/74   | 0.015541598 | 0.033870614 | 2 |
| BP | GO:0046850 | regulation of bone r2/74   | 0.015541598 | 0.033870614 | 2 |
| BP | GO:0055023 | positive regulation c2/74  | 0.015541598 | 0.033870614 | 2 |
| BP | GO:0090199 | regulation of releasc2/74  | 0.015541598 | 0.033870614 | 2 |
| BP | GO:0006165 | nucleoside diphospl3/74    | 0.015549046 | 0.033870614 | 3 |
| BP | GO:0042177 | negative regulation 3/74   | 0.015549046 | 0.033870614 | 3 |
| BP | GO:0043280 | positive regulation c3/74  | 0.015549046 | 0.033870614 | 3 |
| BP | GO:0045598 | regulation of fat cell3/74 | 0.015549046 | 0.033870614 | 3 |
| BP | GO:0032386 | regulation of intrac5/74   | 0.015715024 | 0.0341898   | 5 |
| BP | GO:0071333 | cellular response to 3/74  | 0.015863416 | 0.034469983 | 3 |

|    |            |                             |             |             |   |
|----|------------|-----------------------------|-------------|-------------|---|
| BP | GO:0019318 | hexose metabolic p14/74     | 0.016051091 | 0.034689189 | 4 |
| BP | GO:0031334 | positive regulation c4/74   | 0.016051091 | 0.034689189 | 4 |
| BP | GO:0003254 | regulation of memb2/74      | 0.016161831 | 0.034689189 | 2 |
| BP | GO:0010712 | regulation of collag2/74    | 0.016161831 | 0.034689189 | 2 |
| BP | GO:0035094 | response to nicotinε2/74    | 0.016161831 | 0.034689189 | 2 |
| BP | GO:0071715 | icosanoid transport 2/74    | 0.016161831 | 0.034689189 | 2 |
| BP | GO:1901571 | fatty acid derivative 2/74  | 0.016161831 | 0.034689189 | 2 |
| BP | GO:0009135 | purine nucleoside d3/74     | 0.016181364 | 0.034689189 | 3 |
| BP | GO:0009179 | purine ribonucleosic3/74    | 0.016181364 | 0.034689189 | 3 |
| BP | GO:0046939 | nucleotide phospho3/74      | 0.016181364 | 0.034689189 | 3 |
| BP | GO:0048565 | digestive tract devel3/74   | 0.016181364 | 0.034689189 | 3 |
| BP | GO:0071331 | cellular response to 3/74   | 0.016502893 | 0.035335382 | 3 |
| BP | GO:1903362 | regulation of cellula4/74   | 0.016712377 | 0.03574039  | 4 |
| BP | GO:0014009 | glial cell proliferatio2/74 | 0.016792537 | 0.035813396 | 2 |
| BP | GO:2000725 | regulation of cardia2/74    | 0.016792537 | 0.035813396 | 2 |
| BP | GO:0009185 | ribonucleoside diph3/74     | 0.016828007 | 0.035813396 | 3 |
| BP | GO:0071326 | cellular response to 3/74   | 0.016828007 | 0.035813396 | 3 |
| BP | GO:0071383 | cellular response to 4/74   | 0.016936556 | 0.036000826 | 4 |
| BP | GO:0034605 | cellular response to 3/74   | 0.017156709 | 0.036380807 | 3 |
| BP | GO:1903670 | regulation of sprout3/74    | 0.017156709 | 0.036380807 | 3 |
| BP | GO:0033157 | regulation of intracε4/74   | 0.017390567 | 0.03665847  | 4 |
| BP | GO:0006733 | oxidoreduction coe12/74     | 0.017433627 | 0.03665847  | 2 |
| BP | GO:0032007 | negative regulation 2/74    | 0.017433627 | 0.03665847  | 2 |
| BP | GO:0048260 | positive regulation c2/74   | 0.017433627 | 0.03665847  | 2 |
| BP | GO:0051496 | positive regulation c2/74   | 0.017433627 | 0.03665847  | 2 |
| BP | GO:0097366 | response to bronch12/74     | 0.017433627 | 0.03665847  | 2 |
| BP | GO:2001258 | negative regulation 2/74    | 0.017433627 | 0.03665847  | 2 |
| BP | GO:0046631 | alpha-beta T cell ac3/74    | 0.017489003 | 0.036730975 | 3 |
| BP | GO:0030900 | forebrain developm5/74      | 0.017613431 | 0.03694816  | 5 |
| BP | GO:0031529 | ruffle organization 2/74    | 0.018085009 | 0.037654558 | 2 |
| BP | GO:0035176 | social behavior 2/74        | 0.018085009 | 0.037654558 | 2 |
| BP | GO:0060421 | positive regulation c2/74   | 0.018085009 | 0.037654558 | 2 |
| BP | GO:2000179 | positive regulation c2/74   | 0.018085009 | 0.037654558 | 2 |
| BP | GO:0031330 | negative regulation 4/74    | 0.018085783 | 0.037654558 | 4 |
| BP | GO:0033865 | nucleoside bisphosφ3/74     | 0.018164378 | 0.037654558 | 3 |
| BP | GO:0033875 | ribonucleoside bispl3/74    | 0.018164378 | 0.037654558 | 3 |
| BP | GO:0034032 | purine nucleoside b3/74     | 0.018164378 | 0.037654558 | 3 |
| BP | GO:0060048 | cardiac muscle cont3/74     | 0.018164378 | 0.037654558 | 3 |
| BP | GO:1903364 | positive regulation c3/74   | 0.018164378 | 0.037654558 | 3 |
| BP | GO:0051924 | regulation of calciur4/74   | 0.018321325 | 0.037929061 | 4 |
| BP | GO:0042692 | muscle cell different5/74   | 0.01833995  | 0.037929061 | 5 |
| BP | GO:0009411 | response to UV 3/74         | 0.018507465 | 0.038185653 | 3 |
| BP | GO:0050709 | negative regulation 3/74    | 0.018507465 | 0.038185653 | 3 |
| BP | GO:0022409 | positive regulation c4/74   | 0.018558777 | 0.038246632 | 4 |
| BP | GO:0002043 | blood vessel endot12/74     | 0.018746596 | 0.038408557 | 2 |
| BP | GO:0032964 | collagen biosynthet2/74     | 0.018746596 | 0.038408557 | 2 |
| BP | GO:0050702 | interleukin-1 beta s12/74   | 0.018746596 | 0.038408557 | 2 |
| BP | GO:0050704 | regulation of interle2/74   | 0.018746596 | 0.038408557 | 2 |
| BP | GO:0070228 | regulation of lymph2/74     | 0.018746596 | 0.038408557 | 2 |
| BP | GO:0006606 | protein import into 3/74    | 0.019204451 | 0.03916404  | 3 |
| BP | GO:0031056 | regulation of histon3/74    | 0.019204451 | 0.03916404  | 3 |
| BP | GO:0106106 | cold-induced therm3/74      | 0.019204451 | 0.03916404  | 3 |
| BP | GO:0120161 | regulation of cold-i13/74   | 0.019204451 | 0.03916404  | 3 |
| BP | GO:0006584 | catecholamine metε2/74      | 0.019418297 | 0.039326408 | 2 |
| BP | GO:0009712 | catechol-containing2/74     | 0.019418297 | 0.039326408 | 2 |
| BP | GO:0035384 | thioester biosynthet2/74    | 0.019418297 | 0.039326408 | 2 |
| BP | GO:0046164 | alcohol catabolic pr2/74    | 0.019418297 | 0.039326408 | 2 |
| BP | GO:0051703 | intraspecies interact2/74   | 0.019418297 | 0.039326408 | 2 |

|    |            |                                                   |      |             |             |   |
|----|------------|---------------------------------------------------|------|-------------|-------------|---|
| BP | GO:0071616 | acyl-CoA biosynthesis                             | 2/74 | 0.019418297 | 0.039326408 | 2 |
| BP | GO:0090257 | regulation of muscle contraction                  | 4/74 | 0.019527761 | 0.039502587 | 4 |
| BP | GO:0071322 | cellular response to hypoxia                      | 3/74 | 0.019558353 | 0.039518995 | 3 |
| BP | GO:0071901 | negative regulation of cell growth                | 3/74 | 0.019915865 | 0.04019517  | 3 |
| BP | GO:0002011 | morphogenesis of a cell                           | 2/74 | 0.020100025 | 0.040335306 | 2 |
| BP | GO:0002090 | regulation of receptor activity                   | 2/74 | 0.020100025 | 0.040335306 | 2 |
| BP | GO:0042220 | response to cocaine                               | 2/74 | 0.020100025 | 0.040335306 | 2 |
| BP | GO:0042304 | regulation of fatty acid metabolism               | 2/74 | 0.020100025 | 0.040335306 | 2 |
| BP | GO:0042306 | regulation of protein synthesis                   | 2/74 | 0.020100025 | 0.040335306 | 2 |
| BP | GO:0015850 | organic hydroxy carboxylic acid metabolism        | 4/74 | 0.020274746 | 0.040597732 | 4 |
| BP | GO:0055123 | digestive system development                      | 3/74 | 0.020276987 | 0.040597732 | 3 |
| BP | GO:0010212 | response to ionizing radiation                    | 3/74 | 0.020641721 | 0.041234061 | 3 |
| BP | GO:0043524 | negative regulation of cell growth                | 3/74 | 0.020641721 | 0.041234061 | 3 |
| BP | GO:0006749 | glutathione metabolism                            | 2/74 | 0.020791692 | 0.04129899  | 2 |
| BP | GO:0006977 | DNA damage response                               | 2/74 | 0.020791692 | 0.04129899  | 2 |
| BP | GO:0010332 | response to gamma radiation                       | 2/74 | 0.020791692 | 0.04129899  | 2 |
| BP | GO:1903078 | positive regulation of cell growth                | 2/74 | 0.020791692 | 0.04129899  | 2 |
| BP | GO:1903202 | negative regulation of cell growth                | 2/74 | 0.020791692 | 0.04129899  | 2 |
| BP | GO:0002792 | negative regulation of cell growth                | 3/74 | 0.021010069 | 0.041685655 | 3 |
| BP | GO:0014074 | response to purine metabolism                     | 3/74 | 0.021382032 | 0.042280497 | 3 |
| BP | GO:2000058 | regulation of ubiquitin-mediated proteolysis      | 3/74 | 0.021382032 | 0.042280497 | 3 |
| BP | GO:2001056 | positive regulation of cell growth                | 3/74 | 0.021382032 | 0.042280497 | 3 |
| BP | GO:0072431 | signal transduction in response to hypoxia        | 2/74 | 0.021493211 | 0.042357401 | 2 |
| BP | GO:1900408 | negative regulation of cell growth                | 2/74 | 0.021493211 | 0.042357401 | 2 |
| BP | GO:1902400 | intracellular signal transduction                 | 2/74 | 0.021493211 | 0.042357401 | 2 |
| BP | GO:0050714 | positive regulation of cell growth                | 4/74 | 0.021821229 | 0.042955682 | 4 |
| BP | GO:0045785 | positive regulation of cell growth                | 5/74 | 0.021854925 | 0.04297389  | 5 |
| BP | GO:0055088 | lipid homeostasis                                 | 3/74 | 0.022136804 | 0.043274017 | 3 |
| BP | GO:0017001 | antibiotic catabolic process                      | 2/74 | 0.022204494 | 0.043274017 | 2 |
| BP | GO:0035306 | positive regulation of cell growth                | 2/74 | 0.022204494 | 0.043274017 | 2 |
| BP | GO:0042093 | T-helper cell differentiation                     | 2/74 | 0.022204494 | 0.043274017 | 2 |
| BP | GO:0055081 | anion homeostasis                                 | 2/74 | 0.022204494 | 0.043274017 | 2 |
| BP | GO:0061900 | glial cell activation                             | 2/74 | 0.022204494 | 0.043274017 | 2 |
| BP | GO:1903749 | positive regulation of cell growth                | 2/74 | 0.022204494 | 0.043274017 | 2 |
| BP | GO:1904589 | regulation of protein synthesis                   | 2/74 | 0.022204494 | 0.043274017 | 2 |
| BP | GO:0045927 | positive regulation of cell growth                | 4/74 | 0.022352389 | 0.043514005 | 4 |
| BP | GO:0001678 | cellular glucose homeostasis                      | 3/74 | 0.022519615 | 0.043742665 | 3 |
| BP | GO:0001890 | placenta development                              | 3/74 | 0.022519615 | 0.043742665 | 3 |
| BP | GO:0001836 | release of cytochrome c                           | 2/74 | 0.022925457 | 0.044189188 | 2 |
| BP | GO:0010656 | negative regulation of cell growth                | 2/74 | 0.022925457 | 0.044189188 | 2 |
| BP | GO:0070527 | platelet aggregation                              | 2/74 | 0.022925457 | 0.044189188 | 2 |
| BP | GO:0072413 | signal transduction in response to hypoxia        | 2/74 | 0.022925457 | 0.044189188 | 2 |
| BP | GO:1902402 | signal transduction in response to hypoxia        | 2/74 | 0.022925457 | 0.044189188 | 2 |
| BP | GO:1902403 | signal transduction in response to hypoxia        | 2/74 | 0.022925457 | 0.044189188 | 2 |
| BP | GO:1902883 | negative regulation of cell growth                | 2/74 | 0.022925457 | 0.044189188 | 2 |
| BP | GO:0009132 | nucleoside diphosphate metabolism                 | 3/74 | 0.023296087 | 0.044805326 | 3 |
| BP | GO:1990845 | adaptive thermogenesis                            | 3/74 | 0.023296087 | 0.044805326 | 3 |
| BP | GO:0007517 | muscle organ development                          | 5/74 | 0.023332875 | 0.044827037 | 5 |
| BP | GO:0032507 | maintenance of protein synthesis                  | 2/74 | 0.023656012 | 0.045398231 | 2 |
| BP | GO:0046486 | glycerolipid metabolism                           | 5/74 | 0.024205912 | 0.046402886 | 5 |
| BP | GO:0007405 | neuroblast proliferation                          | 2/74 | 0.024396076 | 0.046463416 | 2 |
| BP | GO:0032233 | positive regulation of cell growth                | 2/74 | 0.024396076 | 0.046463416 | 2 |
| BP | GO:0045604 | regulation of epidermal cell growth               | 2/74 | 0.024396076 | 0.046463416 | 2 |
| BP | GO:0050701 | interleukin-1 secretion                           | 2/74 | 0.024396076 | 0.046463416 | 2 |
| BP | GO:2000514 | regulation of CD4-positive T cell differentiation | 2/74 | 0.024396076 | 0.046463416 | 2 |
| BP | GO:2001244 | positive regulation of cell growth                | 2/74 | 0.024396076 | 0.046463416 | 2 |
| BP | GO:0030522 | intracellular receptor activity                   | 4/74 | 0.024556066 | 0.04671751  | 4 |
| BP | GO:0052126 | movement in host cell                             | 3/74 | 0.024892429 | 0.047306238 | 3 |

|    |            |                                            |      |             |             |   |
|----|------------|--------------------------------------------|------|-------------|-------------|---|
| BP | GO:0010830 | regulation of myotube development          | 2/74 | 0.025145562 | 0.047581541 | 2 |
| BP | GO:0046635 | positive regulation of cell growth         | 2/74 | 0.025145562 | 0.047581541 | 2 |
| BP | GO:0046824 | positive regulation of cell growth         | 2/74 | 0.025145562 | 0.047581541 | 2 |
| BP | GO:0055025 | positive regulation of cell growth         | 2/74 | 0.025145562 | 0.047581541 | 2 |
| BP | GO:0043588 | skin development                           | 5/74 | 0.025326657 | 0.047872685 | 5 |
| BP | GO:0060047 | heart contraction                          | 4/74 | 0.02570567  | 0.048445339 | 4 |
| BP | GO:0007519 | skeletal muscle tissue development         | 3/74 | 0.025712291 | 0.048445339 | 3 |
| BP | GO:0032680 | regulation of tumor cell growth            | 3/74 | 0.025712291 | 0.048445339 | 3 |
| BP | GO:0031571 | mitotic G1 DNA damage response             | 2/74 | 0.025904388 | 0.048547109 | 2 |
| BP | GO:0044819 | mitotic G1/S transition                    | 2/74 | 0.025904388 | 0.048547109 | 2 |
| BP | GO:0046622 | positive regulation of cell growth         | 2/74 | 0.025904388 | 0.048547109 | 2 |
| BP | GO:0046637 | regulation of alpha-actinin-1              | 2/74 | 0.025904388 | 0.048547109 | 2 |
| BP | GO:1904377 | positive regulation of cell growth         | 2/74 | 0.025904388 | 0.048547109 | 2 |
| BP | GO:0044783 | G1 DNA damage response                     | 2/74 | 0.02667247  | 0.049827199 | 2 |
| BP | GO:0045670 | regulation of osteoclast activity          | 2/74 | 0.02667247  | 0.049827199 | 2 |
| BP | GO:0060135 | maternal process in oogenesis              | 2/74 | 0.02667247  | 0.049827199 | 2 |
| BP | GO:0032640 | tumor necrosis factor production           | 3/74 | 0.026969174 | 0.050168222 | 3 |
| BP | GO:0051170 | import into nucleus                        | 3/74 | 0.026969174 | 0.050168222 | 3 |
| BP | GO:1902600 | proton transmembrane transport             | 3/74 | 0.026969174 | 0.050168222 | 3 |
| BP | GO:1903555 | regulation of tumor cell growth            | 3/74 | 0.026969174 | 0.050168222 | 3 |
| BP | GO:0006940 | regulation of smooth muscle contraction    | 2/74 | 0.027449724 | 0.050954303 | 2 |
| BP | GO:0014823 | response to activity                       | 2/74 | 0.027449724 | 0.050954303 | 2 |
| BP | GO:0043254 | regulation of protein synthesis            | 5/74 | 0.027667448 | 0.051304284 | 5 |
| BP | GO:0007162 | negative regulation of cell growth         | 4/74 | 0.027794772 | 0.051486074 | 4 |
| BP | GO:0051926 | negative regulation of cell growth         | 2/74 | 0.028236067 | 0.052248456 | 2 |
| BP | GO:0051090 | regulation of DNA replication              | 5/74 | 0.028395771 | 0.052488724 | 5 |
| BP | GO:0015807 | L-amino acid transport                     | 2/74 | 0.029031418 | 0.053607328 | 2 |
| BP | GO:0001906 | cell killing                               | 3/74 | 0.029136112 | 0.053631643 | 3 |
| BP | GO:0050806 | positive regulation of cell growth         | 3/74 | 0.029136112 | 0.053631643 | 3 |
| BP | GO:0071706 | tumor necrosis factor production           | 3/74 | 0.029136112 | 0.053631643 | 3 |
| BP | GO:0050804 | modulation of chemotaxis                   | 5/74 | 0.029385768 | 0.05403461  | 5 |
| BP | GO:0060538 | skeletal muscle organ development          | 3/74 | 0.029580301 | 0.054335482 | 3 |
| BP | GO:0099177 | regulation of transcription                | 5/74 | 0.029636656 | 0.054382173 | 5 |
| BP | GO:0031343 | positive regulation of cell growth         | 2/74 | 0.029835695 | 0.05440665  | 2 |
| BP | GO:0033866 | nucleoside bisphosphate metabolism         | 2/74 | 0.029835695 | 0.05440665  | 2 |
| BP | GO:0034030 | ribonucleoside bisphosphate metabolism     | 2/74 | 0.029835695 | 0.05440665  | 2 |
| BP | GO:0034033 | purine nucleoside biosynthesis             | 2/74 | 0.029835695 | 0.05440665  | 2 |
| BP | GO:0035924 | cellular response to hypoxia               | 2/74 | 0.029835695 | 0.05440665  | 2 |
| BP | GO:1903317 | regulation of protein synthesis            | 2/74 | 0.029835695 | 0.05440665  | 2 |
| BP | GO:0001818 | negative regulation of cell growth         | 4/74 | 0.029982952 | 0.054618521 | 4 |
| BP | GO:0043433 | negative regulation of cell growth         | 3/74 | 0.030028085 | 0.054644112 | 3 |
| BP | GO:1903522 | regulation of blood vessel development     | 4/74 | 0.030303679 | 0.055088602 | 4 |
| BP | GO:0015909 | long-chain fatty acid metabolism           | 2/74 | 0.030648816 | 0.055601024 | 2 |
| BP | GO:0070227 | lymphocyte apoptosis                       | 2/74 | 0.030648816 | 0.055601024 | 2 |
| BP | GO:0009152 | purine ribonucleotide metabolism           | 3/74 | 0.030934424 | 0.056003564 | 3 |
| BP | GO:0030324 | lung development                           | 3/74 | 0.030934424 | 0.056003564 | 3 |
| BP | GO:0055002 | striated muscle cell development           | 3/74 | 0.031392973 | 0.056682562 | 3 |
| BP | GO:1901990 | regulation of mitotic cell cycle           | 5/74 | 0.031431044 | 0.056682562 | 5 |
| BP | GO:0034121 | regulation of toll-like receptor signaling | 2/74 | 0.031470702 | 0.056682562 | 2 |
| BP | GO:0051966 | regulation of synaptic transmission        | 2/74 | 0.031470702 | 0.056682562 | 2 |
| BP | GO:0072091 | regulation of stem cell self-renewal       | 2/74 | 0.031470702 | 0.056682562 | 2 |
| BP | GO:0042440 | pigment metabolic process                  | 2/74 | 0.032301271 | 0.058059544 | 2 |
| BP | GO:0071479 | cellular response to hypoxia               | 2/74 | 0.032301271 | 0.058059544 | 2 |
| BP | GO:1903037 | regulation of leukocyte chemotaxis         | 4/74 | 0.032605939 | 0.058547302 | 4 |
| BP | GO:0009408 | response to heat                           | 3/74 | 0.032790103 | 0.058757951 | 3 |
| BP | GO:0030323 | respiratory tube development               | 3/74 | 0.032790103 | 0.058757951 | 3 |
| BP | GO:0002532 | production of molecular oxygen             | 2/74 | 0.033140444 | 0.059204687 | 2 |
| BP | GO:0061180 | mammary gland epithelial cell development  | 2/74 | 0.033140444 | 0.059204687 | 2 |

|    |            |                                          |       |             |             |   |
|----|------------|------------------------------------------|-------|-------------|-------------|---|
| BP | GO:1903747 | regulation of established                | 2/74  | 0.033140444 | 0.059204687 | 2 |
| BP | GO:0006941 | striated muscle contraction              | 3/74  | 0.033262962 | 0.059303027 | 3 |
| BP | GO:0048469 | cell maturation                          | 3/74  | 0.033262962 | 0.059303027 | 3 |
| BP | GO:0010950 | positive regulation of                   | 3/74  | 0.033739388 | 0.060091482 | 3 |
| BP | GO:0033555 | multicellular organismal                 | 2/74  | 0.033988142 | 0.060290188 | 2 |
| BP | GO:0043627 | response to estrogen                     | 2/74  | 0.033988142 | 0.060290188 | 2 |
| BP | GO:0072401 | signal transduction                      | 12/74 | 0.033988142 | 0.060290188 | 2 |
| BP | GO:0072422 | signal transduction                      | 12/74 | 0.033988142 | 0.060290188 | 2 |
| BP | GO:0008361 | regulation of cell size                  | 3/74  | 0.034219378 | 0.060517168 | 3 |
| BP | GO:0030177 | positive regulation of                   | 3/74  | 0.034219378 | 0.060517168 | 3 |
| BP | GO:0051099 | positive regulation of                   | 3/74  | 0.034219378 | 0.060517168 | 3 |
| BP | GO:1905330 | regulation of morphogenesis              | 3/74  | 0.034702928 | 0.061130327 | 3 |
| BP | GO:2001257 | regulation of cation transport           | 3/74  | 0.034702928 | 0.061130327 | 3 |
| BP | GO:0001895 | retina homeostasis                       | 2/74  | 0.034844286 | 0.061130327 | 2 |
| BP | GO:0014015 | positive regulation of                   | 2/74  | 0.034844286 | 0.061130327 | 2 |
| BP | GO:0050710 | negative regulation of                   | 2/74  | 0.034844286 | 0.061130327 | 2 |
| BP | GO:0072395 | signal transduction                      | 12/74 | 0.034844286 | 0.061130327 | 2 |
| BP | GO:1900182 | positive regulation of                   | 2/74  | 0.034844286 | 0.061130327 | 2 |
| BP | GO:1901616 | organic hydroxy carboxylate              | 2/74  | 0.034844286 | 0.061130327 | 2 |
| BP | GO:0002285 | lymphocyte activation                    | 3/74  | 0.035190033 | 0.06160886  | 3 |
| BP | GO:0051147 | regulation of muscle contraction         | 3/74  | 0.035190033 | 0.06160886  | 3 |
| BP | GO:0006874 | cellular calcium ion transport           | 5/74  | 0.035222191 | 0.06160886  | 5 |
| BP | GO:0034612 | response to tumor necrosis factor        | 4/74  | 0.035360078 | 0.061788563 | 4 |
| BP | GO:0061138 | morphogenesis of aorta                   | 3/74  | 0.03568069  | 0.062150801 | 3 |
| BP | GO:0002479 | antigen processing and presentation      | 2/74  | 0.035708798 | 0.062150801 | 2 |
| BP | GO:0010611 | regulation of cardiac muscle contraction | 2/74  | 0.035708798 | 0.062150801 | 2 |
| BP | GO:1903201 | regulation of oxidative phosphorylation  | 2/74  | 0.035708798 | 0.062150801 | 2 |
| BP | GO:0002040 | sprouting angiogenesis                   | 3/74  | 0.036174893 | 0.062899757 | 3 |
| BP | GO:0002697 | regulation of immune response            | 5/74  | 0.036355438 | 0.063151218 | 5 |
| BP | GO:0051346 | negative regulation of                   | 5/74  | 0.03664225  | 0.063513928 | 5 |
| BP | GO:0043409 | negative regulation of                   | 3/74  | 0.036672638 | 0.063513928 | 3 |
| BP | GO:0048639 | positive regulation of                   | 3/74  | 0.036672638 | 0.063513928 | 3 |
| BP | GO:0042110 | T cell activation                        | 5/74  | 0.036930465 | 0.06389751  | 5 |
| BP | GO:0009260 | ribonucleotide biosynthesis              | 3/74  | 0.03717392  | 0.06412938  | 3 |
| BP | GO:1902275 | regulation of chromatin organization     | 3/74  | 0.03717392  | 0.06412938  | 3 |
| BP | GO:1903708 | positive regulation of                   | 3/74  | 0.03717392  | 0.06412938  | 3 |
| BP | GO:0030308 | negative regulation of                   | 3/74  | 0.037678734 | 0.064173193 | 3 |
| BP | GO:0055001 | muscle cell development                  | 3/74  | 0.037678734 | 0.064173193 | 3 |
| BP | GO:0043010 | camera-type eye development              | 4/74  | 0.037878022 | 0.064173193 | 4 |
| BP | GO:0010827 | regulation of glucose transport          | 2/74  | 0.038351765 | 0.064173193 | 2 |
| BP | GO:0014743 | regulation of muscle contraction         | 2/74  | 0.038351765 | 0.064173193 | 2 |
| BP | GO:0032413 | negative regulation of                   | 2/74  | 0.038351765 | 0.064173193 | 2 |
| BP | GO:0055021 | regulation of cardiac muscle contraction | 2/74  | 0.038351765 | 0.064173193 | 2 |
| BP | GO:0072347 | response to anesthetic                   | 2/74  | 0.038351765 | 0.064173193 | 2 |
| BP | GO:0090398 | cellular senescence                      | 2/74  | 0.038351765 | 0.064173193 | 2 |
| BP | GO:0006575 | cellular modified arrangement            | 3/74  | 0.038698937 | 0.064173193 | 3 |
| BP | GO:0001660 | fever generation                         | 1/74  | 0.038945473 | 0.064173193 | 1 |
| BP | GO:0006751 | glutathione catabolism                   | 1/74  | 0.038945473 | 0.064173193 | 1 |
| BP | GO:0009396 | folic acid-containing compound           | 1/74  | 0.038945473 | 0.064173193 | 1 |
| BP | GO:0010918 | positive regulation of                   | 1/74  | 0.038945473 | 0.064173193 | 1 |
| BP | GO:0010944 | negative regulation of                   | 1/74  | 0.038945473 | 0.064173193 | 1 |
| BP | GO:0014041 | regulation of neuronal development       | 1/74  | 0.038945473 | 0.064173193 | 1 |
| BP | GO:0030388 | fructose 1,6-bisphosphate                | 1/74  | 0.038945473 | 0.064173193 | 1 |
| BP | GO:0031284 | positive regulation of                   | 1/74  | 0.038945473 | 0.064173193 | 1 |
| BP | GO:0032025 | response to cobalt ion                   | 1/74  | 0.038945473 | 0.064173193 | 1 |
| BP | GO:0032328 | alanine transport                        | 1/74  | 0.038945473 | 0.064173193 | 1 |
| BP | GO:0032464 | positive regulation of                   | 1/74  | 0.038945473 | 0.064173193 | 1 |
| BP | GO:0033210 | leptin-mediated signaling                | 1/74  | 0.038945473 | 0.064173193 | 1 |

|    |            |                            |             |             |   |
|----|------------|----------------------------|-------------|-------------|---|
| BP | GO:0034135 | regulation of toll-lik1/74 | 0.038945473 | 0.064173193 | 1 |
| BP | GO:0035672 | oligopeptide transr1/74    | 0.038945473 | 0.064173193 | 1 |
| BP | GO:0035871 | protein K11-linked c1/74   | 0.038945473 | 0.064173193 | 1 |
| BP | GO:0043653 | mitochondrial fragrn1/74   | 0.038945473 | 0.064173193 | 1 |
| BP | GO:0045348 | positive regulation c1/74  | 0.038945473 | 0.064173193 | 1 |
| BP | GO:0045792 | negative regulation 1/74   | 0.038945473 | 0.064173193 | 1 |
| BP | GO:0045945 | positive regulation c1/74  | 0.038945473 | 0.064173193 | 1 |
| BP | GO:0048021 | regulation of melan1/74    | 0.038945473 | 0.064173193 | 1 |
| BP | GO:0048102 | autophagic cell dea1/74    | 0.038945473 | 0.064173193 | 1 |
| BP | GO:0048149 | behavioral response1/74    | 0.038945473 | 0.064173193 | 1 |
| BP | GO:0051901 | positive regulation c1/74  | 0.038945473 | 0.064173193 | 1 |
| BP | GO:0060513 | prostatic bud forma1/74    | 0.038945473 | 0.064173193 | 1 |
| BP | GO:0070099 | regulation of chemc1/74    | 0.038945473 | 0.064173193 | 1 |
| BP | GO:0071233 | cellular response to 1/74  | 0.038945473 | 0.064173193 | 1 |
| BP | GO:0090037 | positive regulation c1/74  | 0.038945473 | 0.064173193 | 1 |
| BP | GO:0090336 | positive regulation c1/74  | 0.038945473 | 0.064173193 | 1 |
| BP | GO:0106049 | regulation of cellula1/74  | 0.038945473 | 0.064173193 | 1 |
| BP | GO:1900222 | negative regulation 1/74   | 0.038945473 | 0.064173193 | 1 |
| BP | GO:1901725 | regulation of histon1/74   | 0.038945473 | 0.064173193 | 1 |
| BP | GO:1901838 | positive regulation c1/74  | 0.038945473 | 0.064173193 | 1 |
| BP | GO:1903800 | positive regulation c1/74  | 0.038945473 | 0.064173193 | 1 |
| BP | GO:1990253 | cellular response to 1/74  | 0.038945473 | 0.064173193 | 1 |
| BP | GO:2000109 | regulation of macro1/74    | 0.038945473 | 0.064173193 | 1 |
| BP | GO:2000253 | positive regulation c1/74  | 0.038945473 | 0.064173193 | 1 |
| BP | GO:2001054 | negative regulation 1/74   | 0.038945473 | 0.064173193 | 1 |
| BP | GO:0055074 | calcium ion homeos5/74     | 0.038987368 | 0.064173193 | 5 |
| BP | GO:0060562 | epithelial tube morç4/74   | 0.038988097 | 0.064173193 | 4 |
| BP | GO:0001570 | vasculogenesis 2/74        | 0.039248975 | 0.064301553 | 2 |
| BP | GO:0003151 | outflow tract morph2/74    | 0.039248975 | 0.064301553 | 2 |
| BP | GO:0030193 | regulation of blood 2/74   | 0.039248975 | 0.064301553 | 2 |
| BP | GO:0042590 | antigen processing 2/74    | 0.039248975 | 0.064301553 | 2 |
| BP | GO:0045913 | positive regulation c2/74  | 0.039248975 | 0.064301553 | 2 |
| BP | GO:0032984 | protein-containing 4/74    | 0.039362254 | 0.064427094 | 4 |
| BP | GO:0050769 | positive regulation c5/74  | 0.039890073 | 0.065230278 | 5 |
| BP | GO:1900046 | regulation of hemoç2/74    | 0.040154168 | 0.065583976 | 2 |
| BP | GO:0051054 | positive regulation c3/74  | 0.040255601 | 0.065583976 | 3 |
| BP | GO:0071478 | cellular response to 3/74  | 0.040255601 | 0.065583976 | 3 |
| BP | GO:0098657 | import into cell 3/74      | 0.040255601 | 0.065583976 | 3 |
| BP | GO:0017038 | protein import 3/74        | 0.040781496 | 0.066317833 | 3 |
| BP | GO:0046390 | ribose phosphate bi3/74    | 0.040781496 | 0.066317833 | 3 |
| BP | GO:0032436 | positive regulation c2/74  | 0.041067269 | 0.066475079 | 2 |
| BP | GO:0033238 | regulation of cellula2/74  | 0.041067269 | 0.066475079 | 2 |
| BP | GO:0034109 | homotypic cell-cell 2/74   | 0.041067269 | 0.066475079 | 2 |
| BP | GO:0110110 | positive regulation c2/74  | 0.041067269 | 0.066475079 | 2 |
| BP | GO:1902930 | regulation of alcohc2/74   | 0.041067269 | 0.066475079 | 2 |
| BP | GO:0051224 | negative regulation 3/74   | 0.041310885 | 0.0668079   | 3 |
| BP | GO:0070838 | divalent metal ion tr5/74  | 0.041422929 | 0.066927527 | 5 |
| BP | GO:1901987 | regulation of cell cy5/74  | 0.041733763 | 0.067289014 | 5 |
| BP | GO:0003333 | amino acid transme2/74     | 0.041988202 | 0.067289014 | 2 |
| BP | GO:0071158 | positive regulation c2/74  | 0.041988202 | 0.067289014 | 2 |
| BP | GO:1905954 | positive regulation c2/74  | 0.041988202 | 0.067289014 | 2 |
| BP | GO:0002887 | negative regulation 1/74   | 0.042756729 | 0.067289014 | 1 |
| BP | GO:0005984 | disaccharide metabç1/74    | 0.042756729 | 0.067289014 | 1 |
| BP | GO:0006857 | oligopeptide transp1/74    | 0.042756729 | 0.067289014 | 1 |
| BP | GO:0007195 | adenylate cyclase-ir1/74   | 0.042756729 | 0.067289014 | 1 |
| BP | GO:0016264 | gap junction assembl1/74   | 0.042756729 | 0.067289014 | 1 |
| BP | GO:0019371 | cyclooxygenase pat1/74     | 0.042756729 | 0.067289014 | 1 |
| BP | GO:0031652 | positive regulation c1/74  | 0.042756729 | 0.067289014 | 1 |



|    |            |                                      |             |             |   |
|----|------------|--------------------------------------|-------------|-------------|---|
| BP | GO:0031915 | positive regulation of c1/74         | 0.042756729 | 0.067289014 | 1 |
| BP | GO:0033629 | negative regulation of 1/74          | 0.042756729 | 0.067289014 | 1 |
| BP | GO:0034776 | response to histamine 1/74           | 0.042756729 | 0.067289014 | 1 |
| BP | GO:0036462 | TRAIL-activated apoptosis 1/74       | 0.042756729 | 0.067289014 | 1 |
| BP | GO:0040015 | negative regulation of 1/74          | 0.042756729 | 0.067289014 | 1 |
| BP | GO:0043129 | surfactant homeostasis 1/74          | 0.042756729 | 0.067289014 | 1 |
| BP | GO:0051561 | positive regulation of c1/74         | 0.042756729 | 0.067289014 | 1 |
| BP | GO:0051574 | positive regulation of c1/74         | 0.042756729 | 0.067289014 | 1 |
| BP | GO:0051583 | dopamine uptake in 1/74              | 0.042756729 | 0.067289014 | 1 |
| BP | GO:0051934 | catecholamine uptake 1/74            | 0.042756729 | 0.067289014 | 1 |
| BP | GO:0060525 | prostate glandular atrophy 1/74      | 0.042756729 | 0.067289014 | 1 |
| BP | GO:0060947 | cardiac vascular smooth muscle c1/74 | 0.042756729 | 0.067289014 | 1 |
| BP | GO:0070254 | mucus secretion 1/74                 | 0.042756729 | 0.067289014 | 1 |
| BP | GO:0070673 | response to interleukin 1/74         | 0.042756729 | 0.067289014 | 1 |
| BP | GO:0072537 | fibroblast activation 1/74           | 0.042756729 | 0.067289014 | 1 |
| BP | GO:0099149 | regulation of postsynaptic 1/74      | 0.042756729 | 0.067289014 | 1 |
| BP | GO:1990440 | positive regulation of c1/74         | 0.042756729 | 0.067289014 | 1 |
| BP | GO:2000767 | positive regulation of c1/74         | 0.042756729 | 0.067289014 | 1 |
| BP | GO:0042509 | regulation of tyrosine kinase 2/74   | 0.042916894 | 0.067364964 | 2 |
| BP | GO:0045582 | positive regulation of c2/74         | 0.042916894 | 0.067364964 | 2 |
| BP | GO:0001763 | morphogenesis of a3/74               | 0.042919953 | 0.067364964 | 3 |
| BP | GO:0016042 | lipid catabolic process 4/74         | 0.043217546 | 0.067771541 | 4 |
| BP | GO:0009749 | response to glucose 3/74             | 0.043463256 | 0.068035467 | 3 |
| BP | GO:1904950 | negative regulation of 3/74          | 0.043463256 | 0.068035467 | 3 |
| BP | GO:0072511 | divalent inorganic cation 5/74       | 0.04362868  | 0.068233654 | 5 |
| BP | GO:0050818 | regulation of coagulation 2/74       | 0.043853271 | 0.068402337 | 2 |
| BP | GO:0051492 | regulation of stress 2/74            | 0.043853271 | 0.068402337 | 2 |
| BP | GO:0060420 | regulation of heart 2/74             | 0.043853271 | 0.068402337 | 2 |
| BP | GO:0060541 | respiratory system c3/74             | 0.044010022 | 0.06858598  | 3 |
| BP | GO:0050866 | negative regulation of 3/74          | 0.044560244 | 0.069381946 | 3 |
| BP | GO:0034308 | primary alcohol metabolism 2/74      | 0.044797258 | 0.069597687 | 2 |
| BP | GO:0045682 | regulation of epidermis 2/74         | 0.044797258 | 0.069597687 | 2 |
| BP | GO:0007159 | leukocyte cell-cell adhesion 4/74    | 0.044817576 | 0.069597687 | 4 |
| BP | GO:0045930 | negative regulation of 4/74          | 0.045222754 | 0.06987859  | 4 |
| BP | GO:0001942 | hair follicle development 2/74       | 0.045748782 | 0.06987859  | 2 |
| BP | GO:0006919 | activation of cysteine 2/74          | 0.045748782 | 0.06987859  | 2 |
| BP | GO:0007260 | tyrosine phosphorylation 2/74        | 0.045748782 | 0.06987859  | 2 |
| BP | GO:0032760 | positive regulation of c2/74         | 0.045748782 | 0.06987859  | 2 |
| BP | GO:0042446 | hormone biosynthesis 2/74            | 0.045748782 | 0.06987859  | 2 |
| BP | GO:0050870 | positive regulation of c3/74         | 0.046231579 | 0.06987859  | 3 |
| BP | GO:0051701 | interaction with host 3/74           | 0.046231579 | 0.06987859  | 3 |
| BP | GO:0002551 | mast cell chemotaxis 1/74            | 0.046553074 | 0.06987859  | 1 |
| BP | GO:0006020 | inositol metabolic process 1/74      | 0.046553074 | 0.06987859  | 1 |
| BP | GO:0006527 | arginine catabolic process 1/74      | 0.046553074 | 0.06987859  | 1 |
| BP | GO:0010649 | regulation of cell cycle 1/74        | 0.046553074 | 0.06987859  | 1 |
| BP | GO:0010960 | magnesium ion homeostasis 1/74       | 0.046553074 | 0.06987859  | 1 |
| BP | GO:0014889 | muscle atrophy 1/74                  | 0.046553074 | 0.06987859  | 1 |
| BP | GO:0031282 | regulation of guanylate 1/74         | 0.046553074 | 0.06987859  | 1 |
| BP | GO:0031392 | regulation of prostate 1/74          | 0.046553074 | 0.06987859  | 1 |
| BP | GO:0032429 | regulation of phosphorus 1/74        | 0.046553074 | 0.06987859  | 1 |
| BP | GO:0042368 | vitamin D biosynthesis 1/74          | 0.046553074 | 0.06987859  | 1 |
| BP | GO:0042416 | dopamine biosynthesis 1/74           | 0.046553074 | 0.06987859  | 1 |
| BP | GO:0043117 | positive regulation of c1/74         | 0.046553074 | 0.06987859  | 1 |
| BP | GO:0051481 | negative regulation of 1/74          | 0.046553074 | 0.06987859  | 1 |
| BP | GO:0051549 | positive regulation of c1/74         | 0.046553074 | 0.06987859  | 1 |
| BP | GO:0051657 | maintenance of organ 1/74            | 0.046553074 | 0.06987859  | 1 |
| BP | GO:0060742 | epithelial cell differentiation 1/74 | 0.046553074 | 0.06987859  | 1 |
| BP | GO:0070243 | regulation of thymus 1/74            | 0.046553074 | 0.06987859  | 1 |

|    |            |                                |      |             |             |   |
|----|------------|--------------------------------|------|-------------|-------------|---|
| BP | GO:0070486 | leukocyte aggregation          | 1/74 | 0.046553074 | 0.06987859  | 1 |
| BP | GO:0071481 | cellular response to           | 1/74 | 0.046553074 | 0.06987859  | 1 |
| BP | GO:0071679 | commissural neurite            | 1/74 | 0.046553074 | 0.06987859  | 1 |
| BP | GO:0071888 | macrophage apoptosis           | 1/74 | 0.046553074 | 0.06987859  | 1 |
| BP | GO:0072578 | neurotransmitter-gated         | 1/74 | 0.046553074 | 0.06987859  | 1 |
| BP | GO:0090331 | negative regulation of         | 1/74 | 0.046553074 | 0.06987859  | 1 |
| BP | GO:0097284 | hepatocyte apoptosis           | 1/74 | 0.046553074 | 0.06987859  | 1 |
| BP | GO:0097531 | mast cell migration            | 1/74 | 0.046553074 | 0.06987859  | 1 |
| BP | GO:0150065 | regulation of deacetylation    | 1/74 | 0.046553074 | 0.06987859  | 1 |
| BP | GO:1900376 | regulation of second messenger | 1/74 | 0.046553074 | 0.06987859  | 1 |
| BP | GO:1903909 | regulation of receptor         | 1/74 | 0.046553074 | 0.06987859  | 1 |
| BP | GO:1904181 | positive regulation of         | 1/74 | 0.046553074 | 0.06987859  | 1 |
| BP | GO:2000121 | regulation of removal          | 1/74 | 0.046553074 | 0.06987859  | 1 |
| BP | GO:2001053 | regulation of mesoderm         | 1/74 | 0.046553074 | 0.06987859  | 1 |
| BP | GO:0001892 | embryonic placenta             | 2/74 | 0.04670777  | 0.06987859  | 2 |
| BP | GO:0006112 | energy reserve metabolism      | 2/74 | 0.04670777  | 0.06987859  | 2 |
| BP | GO:0045844 | positive regulation of         | 2/74 | 0.04670777  | 0.06987859  | 2 |
| BP | GO:0048636 | positive regulation of         | 2/74 | 0.04670777  | 0.06987859  | 2 |
| BP | GO:0033044 | regulation of chromosome       | 4/74 | 0.046864134 | 0.069993386 | 4 |
| BP | GO:1904062 | regulation of cation           | 4/74 | 0.046864134 | 0.069993386 | 4 |
| BP | GO:0022404 | molting cycle process          | 2/74 | 0.047674151 | 0.070603319 | 2 |
| BP | GO:0022405 | hair cycle process             | 2/74 | 0.047674151 | 0.070603319 | 2 |
| BP | GO:0032088 | negative regulation of         | 2/74 | 0.047674151 | 0.070603319 | 2 |
| BP | GO:0034103 | regulation of tissue           | 2/74 | 0.047674151 | 0.070603319 | 2 |
| BP | GO:0061097 | regulation of protein          | 2/74 | 0.047674151 | 0.070603319 | 2 |
| BP | GO:0070098 | chemokine-mediated             | 2/74 | 0.047674151 | 0.070603319 | 2 |
| BP | GO:0098773 | skin epidermis development     | 2/74 | 0.047674151 | 0.070603319 | 2 |
| BP | GO:1901863 | positive regulation of         | 2/74 | 0.047674151 | 0.070603319 | 2 |
| BP | GO:1903557 | positive regulation of         | 2/74 | 0.047674151 | 0.070603319 | 2 |
| BP | GO:2000177 | regulation of neural           | 2/74 | 0.047674151 | 0.070603319 | 2 |
| BP | GO:0032410 | negative regulation of         | 2/74 | 0.048647852 | 0.071704107 | 2 |
| BP | GO:0097306 | cellular response to           | 2/74 | 0.048647852 | 0.071704107 | 2 |
| BP | GO:0002064 | epithelial cell development    | 3/74 | 0.04908562  | 0.071704107 | 3 |
| BP | GO:0045185 | maintenance of protein         | 2/74 | 0.049628802 | 0.071704107 | 2 |
| BP | GO:0007178 | transmembrane receptor         | 4/74 | 0.049816057 | 0.071704107 | 4 |
| CC | GO:0043020 | NADPH oxidase complex          | 3/73 | 2.15E-05    | 0.002665265 | 3 |
| CC | GO:0045177 | apical part of cell            | 8/73 | 8.57E-05    | 0.0048015   | 8 |
| CC | GO:0016323 | basolateral plasma membrane    | 6/73 | 0.00015275  | 0.0048015   | 6 |
| CC | GO:0016324 | apical plasma membrane         | 7/73 | 0.000174055 | 0.0048015   | 7 |
| CC | GO:0005901 | caveola                        | 4/73 | 0.000221099 | 0.0048015   | 4 |
| CC | GO:0005811 | lipid droplet                  | 4/73 | 0.000231937 | 0.0048015   | 4 |
| CC | GO:0005791 | rough endoplasmic              | 4/73 | 0.00027914  | 0.00495316  | 4 |
| CC | GO:0005741 | mitochondrial outer            | 5/73 | 0.000518423 | 0.008049199 | 5 |
| CC | GO:0044853 | plasma membrane                | 4/73 | 0.000717395 | 0.008960573 | 4 |
| CC | GO:1990204 | oxidoreductase complex         | 4/73 | 0.000848605 | 0.008960573 | 4 |
| CC | GO:0097449 | astrocyte projection           | 2/73 | 0.000871189 | 0.008960573 | 2 |
| CC | GO:0031968 | organelle outer membrane       | 5/73 | 0.000897187 | 0.008960573 | 5 |
| CC | GO:0019867 | outer membrane                 | 5/73 | 0.000937823 | 0.008960573 | 5 |
| CC | GO:0045121 | membrane raft                  | 6/73 | 0.001099278 | 0.009252141 | 6 |
| CC | GO:0098857 | membrane microdomain           | 6/73 | 0.001117314 | 0.009252141 | 6 |
| CC | GO:0098589 | membrane region                | 6/73 | 0.001351971 | 0.010495563 | 6 |
| CC | GO:0097038 | perinuclear endoplasmic        | 2/73 | 0.002977017 | 0.021751577 | 2 |
| CC | GO:0031528 | microvillus membrane           | 2/73 | 0.003252755 | 0.022445914 | 2 |
| CC | GO:0097386 | glial cell projection          | 2/73 | 0.003539988 | 0.022473982 | 2 |
| CC | GO:0005902 | microvillus                    | 3/73 | 0.003618692 | 0.022473982 | 3 |
| CC | GO:0030139 | endocytic vesicle              | 5/73 | 0.005314197 | 0.031432345 | 5 |
| CC | GO:0009925 | basal plasma membrane          | 2/73 | 0.007025701 | 0.034806645 | 2 |
| CC | GO:0042470 | melanosome                     | 3/73 | 0.007151806 | 0.034806645 | 3 |

|    |            |                       |      |             |             |   |
|----|------------|-----------------------|------|-------------|-------------|---|
| CC | GO:0048770 | pigment granule       | 3/73 | 0.007151806 | 0.034806645 | 3 |
| CC | GO:0031253 | cell projection mem   | 5/73 | 0.007194747 | 0.034806645 | 5 |
| CC | GO:0031983 | vesicle lumen         | 5/73 | 0.007285798 | 0.034806645 | 5 |
| CC | GO:0016363 | nuclear matrix        | 3/73 | 0.007721457 | 0.035521714 | 3 |
| CC | GO:0034399 | nuclear periphery     | 3/73 | 0.012712294 | 0.056392885 | 3 |
| CC | GO:0042383 | sarcolemma            | 3/73 | 0.014051315 | 0.060183489 | 3 |
| CC | GO:0014704 | intercalated disc     | 2/73 | 0.014768486 | 0.061146714 | 2 |
| CC | GO:0045178 | basal part of cell    | 2/73 | 0.01533485  | 0.061443543 | 2 |
| CC | GO:0072562 | blood microparticle   | 3/73 | 0.017270202 | 0.067035652 | 3 |
| CC | GO:0031901 | early endosome me     | 3/73 | 0.017896074 | 0.067360024 | 3 |
| CC | GO:0030667 | secretory granule m   | 4/73 | 0.024662544 | 0.090098459 | 4 |
| CC | GO:0031093 | platelet alpha granu  | 2/73 | 0.02560404  | 0.090865465 | 2 |
| CC | GO:0005938 | cell cortex           | 4/73 | 0.027403665 | 0.091657902 | 4 |
| CC | GO:0044291 | cell-cell contact zor | 2/73 | 0.028506587 | 0.091657902 | 2 |
| CC | GO:0005635 | nuclear envelope      | 5/73 | 0.028740695 | 0.091657902 | 5 |
| CC | GO:0032592 | integral component    | 2/73 | 0.030005126 | 0.091657902 | 2 |
| CC | GO:0070821 | tertiary granule mer  | 2/73 | 0.030005126 | 0.091657902 | 2 |
| CC | GO:0098573 | intrinsic component   | 2/73 | 0.030765979 | 0.091657902 | 2 |
| CC | GO:0034774 | secretory granule lu  | 4/73 | 0.031230662 | 0.091657902 | 4 |
| CC | GO:0000792 | heterochromatin       | 2/73 | 0.032310525 | 0.091657902 | 2 |
| CC | GO:0060205 | cytoplasmic vesicle   | 4/73 | 0.032468647 | 0.091657902 | 4 |
| CC | GO:0043025 | neuronal cell body    | 5/73 | 0.036995078 | 0.100238497 | 5 |
| CC | GO:0016234 | inclusion body        | 2/73 | 0.037122223 | 0.100238497 | 2 |
| CC | GO:0120111 | neuron projection c   | 2/73 | 0.038783779 | 0.102496885 | 2 |
| CC | GO:0031932 | TORC2 complex         | 1/73 | 0.039990622 | 0.103484503 | 1 |
| CC | GO:0005769 | early endosome        | 4/73 | 0.040856275 | 0.103566926 | 4 |
| CC | GO:0098858 | actin-based cell pro  | 3/73 | 0.042010602 | 0.10436318  | 3 |
| CC | GO:0031091 | platelet alpha granu  | 2/73 | 0.044816461 | 0.107051465 | 2 |
| CC | GO:0035579 | specific granule mer  | 2/73 | 0.044816461 | 0.107051465 | 2 |
| CC | GO:0044233 | mitochondria-assoc    | 1/73 | 0.047090251 | 0.11036047  | 1 |
| MF | GO:0016701 | oxidoreductase acti   | 7/72 | 1.51E-11    | 3.46E-09    | 7 |
| MF | GO:0016702 | oxidoreductase acti   | 6/72 | 1.01E-09    | 1.16E-07    | 6 |
| MF | GO:0005506 | iron ion binding      | 9/72 | 1.08E-08    | 8.20E-07    | 9 |
| MF | GO:0016651 | oxidoreductase acti   | 7/72 | 2.58E-07    | 1.48E-05    | 7 |
| MF | GO:0051213 | dioxygenase activity  | 6/72 | 1.86E-06    | 8.51E-05    | 6 |
| MF | GO:0008199 | ferric iron binding   | 3/72 | 1.04E-05    | 0.000396309 | 3 |
| MF | GO:0016175 | superoxide-generat    | 3/72 | 1.38E-05    | 0.000429135 | 3 |
| MF | GO:0015144 | carbohydrate trans    | 4/72 | 1.50E-05    | 0.000429135 | 4 |
| MF | GO:0020037 | heme binding          | 6/72 | 1.82E-05    | 0.000462655 | 6 |
| MF | GO:0050662 | coenzyme binding      | 8/72 | 2.34E-05    | 0.000533462 | 8 |
| MF | GO:0046906 | tetrapyrrole binding  | 6/72 | 2.73E-05    | 0.00056736  | 6 |
| MF | GO:0050664 | oxidoreductase acti   | 3/72 | 4.22E-05    | 0.000802433 | 3 |
| MF | GO:0016705 | oxidoreductase acti   | 6/72 | 4.58E-05    | 0.000805606 | 6 |
| MF | GO:0030170 | pyridoxal phosphat    | 4/72 | 6.83E-05    | 0.000941303 | 4 |
| MF | GO:0070279 | vitamin B6 binding    | 4/72 | 6.83E-05    | 0.000941303 | 4 |
| MF | GO:0005355 | glucose transmembr    | 3/72 | 7.01E-05    | 0.000941303 | 3 |
| MF | GO:0015149 | hexose transmembr     | 3/72 | 7.01E-05    | 0.000941303 | 3 |
| MF | GO:0008483 | transaminase activit  | 3/72 | 8.15E-05    | 0.00103415  | 3 |
| MF | GO:0015145 | monosaccharide tra    | 3/72 | 9.41E-05    | 0.001131105 | 3 |
| MF | GO:0016769 | transferase activity, | 3/72 | 0.000107882 | 0.001224546 | 3 |
| MF | GO:0016829 | lyase activity        | 6/72 | 0.000112579 | 0.001224546 | 6 |
| MF | GO:0051119 | sugar transmembra     | 3/72 | 0.000122934 | 0.001276401 | 3 |
| MF | GO:0031406 | carboxylic acid bind  | 6/72 | 0.000133827 | 0.001329086 | 6 |
| MF | GO:0004033 | aldo-keto reductase   | 3/72 | 0.000157    | 0.001494257 | 3 |
| MF | GO:0031625 | ubiquitin protein lig | 7/72 | 0.000175055 | 0.001599449 | 7 |
| MF | GO:0043177 | organic acid binding  | 6/72 | 0.000185831 | 0.001632601 | 6 |
| MF | GO:0044389 | ubiquitin-like protei | 7/72 | 0.00025292  | 0.002139715 | 7 |
| MF | GO:0016209 | antioxidant activity  | 4/72 | 0.000415866 | 0.003298343 | 4 |

|    |            |                        |      |             |             |   |
|----|------------|------------------------|------|-------------|-------------|---|
| MF | GO:0019825 | oxygen binding         | 3/72 | 0.000418753 | 0.003298343 | 3 |
| MF | GO:0016709 | oxidoreductase acti    | 3/72 | 0.000531327 | 0.00404554  | 3 |
| MF | GO:0009055 | electron transfer act  | 4/72 | 0.001199682 | 0.00882974  | 4 |
| MF | GO:0004032 | alditol:NADP+ 1-ox     | 2/72 | 0.001236977 | 0.00882974  | 2 |
| MF | GO:0016836 | hydro-lyase activity   | 3/72 | 0.001533829 | 0.010616934 | 3 |
| MF | GO:0072349 | modified amino acid    | 2/72 | 0.001656419 | 0.011128264 | 2 |
| MF | GO:0003996 | acyl-CoA ligase acti   | 2/72 | 0.001888076 | 0.012322183 | 2 |
| MF | GO:0033293 | monocarboxylic acid    | 3/72 | 0.002252459 | 0.014291921 | 3 |
| MF | GO:0019842 | vitamin binding        | 4/72 | 0.002416911 | 0.014784774 | 4 |
| MF | GO:0002039 | p53 binding            | 3/72 | 0.002459587 | 0.014784774 | 3 |
| MF | GO:0008106 | alcohol dehydrogen     | 2/72 | 0.003260991 | 0.019099461 | 2 |
| MF | GO:0016835 | carbon-oxygen lyas     | 3/72 | 0.003535993 | 0.020192383 | 3 |
| MF | GO:0050660 | flavin adenine dinuc   | 3/72 | 0.004093343 | 0.022805017 | 3 |
| MF | GO:0008198 | ferrous iron binding   | 2/72 | 0.004252248 | 0.023126261 | 2 |
| MF | GO:0016405 | CoA-ligase activity    | 2/72 | 0.004980971 | 0.025858151 | 2 |
| MF | GO:0016628 | oxidoreductase acti    | 2/72 | 0.004980971 | 0.025858151 | 2 |
| MF | GO:0090482 | vitamin transmembr     | 2/72 | 0.00536536  | 0.027234693 | 2 |
| MF | GO:0005126 | cytokine receptor bi   | 5/72 | 0.006169    | 0.030633247 | 5 |
| MF | GO:0016878 | acid-thiol ligase act  | 2/72 | 0.006597301 | 0.03206303  | 2 |
| MF | GO:0015175 | neutral amino acid t   | 2/72 | 0.007033839 | 0.033472435 | 2 |
| MF | GO:0004497 | monooxygenase act      | 3/72 | 0.007663012 | 0.035722311 | 3 |
| MF | GO:0016229 | steroid dehydrogen     | 2/72 | 0.008906551 | 0.039123919 | 2 |
| MF | GO:0016831 | carboxy-lyase activi   | 2/72 | 0.008906551 | 0.039123919 | 2 |
| MF | GO:1901682 | sulfur compound tra    | 2/72 | 0.008906551 | 0.039123919 | 2 |
| MF | GO:0008514 | organic anion trans    | 4/72 | 0.010577549 | 0.045587448 | 4 |
| MF | GO:0016877 | ligase activity, formi | 2/72 | 0.011524213 | 0.048747644 | 2 |
| MF | GO:0005125 | cytokine activity      | 4/72 | 0.012378228 | 0.051408141 | 4 |
| MF | GO:0016616 | oxidoreductase acti    | 3/72 | 0.012628942 | 0.051512791 | 3 |
| MF | GO:0016614 | oxidoreductase acti    | 3/72 | 0.015342922 | 0.061485025 | 3 |
| MF | GO:0015485 | cholesterol binding    | 2/72 | 0.016971835 | 0.066840077 | 2 |
| MF | GO:0016830 | carbon-carbon lyas     | 2/72 | 0.018305005 | 0.070868618 | 2 |
| MF | GO:0004601 | peroxidase activity    | 2/72 | 0.018987719 | 0.071101552 | 2 |
| MF | GO:0015459 | potassium channel      | 2/72 | 0.018987719 | 0.071101552 | 2 |
| MF | GO:0015179 | L-amino acid trans     | 2/72 | 0.020384926 | 0.075102358 | 2 |
| MF | GO:0016684 | oxidoreductase acti    | 2/72 | 0.021823874 | 0.076692803 | 2 |
| MF | GO:0032934 | sterol binding         | 2/72 | 0.021823874 | 0.076692803 | 2 |
| MF | GO:0043621 | protein self-associ    | 2/72 | 0.021823874 | 0.076692803 | 2 |
| MF | GO:0016627 | oxidoreductase acti    | 2/72 | 0.023303812 | 0.080652747 | 2 |
| MF | GO:0005507 | copper ion binding     | 2/72 | 0.024058921 | 0.082023344 | 2 |
| MF | GO:0016655 | oxidoreductase acti    | 2/72 | 0.024824    | 0.083387122 | 2 |
| MF | GO:0004860 | protein kinase inhib   | 2/72 | 0.027178152 | 0.089971913 | 2 |
| MF | GO:0019210 | kinase inhibitor acti  | 2/72 | 0.030451136 | 0.099366866 | 2 |
| MF | GO:0048365 | Rac GTPase binding     | 2/72 | 0.032143518 | 0.103412059 | 2 |
| MF | GO:0001228 | DNA-binding trans      | 5/72 | 0.033135211 | 0.104551343 | 5 |
| MF | GO:0001216 | DNA-binding trans      | 5/72 | 0.033413067 | 0.104551343 | 5 |
| MF | GO:0015171 | amino acid transme     | 2/72 | 0.03475     | 0.107265292 | 2 |
| MF | GO:0019887 | protein kinase regul   | 3/72 | 0.037029375 | 0.112688321 | 3 |
| MF | GO:0038024 | cargo receptor activ   | 2/72 | 0.038348508 | 0.112688321 | 2 |
| MF | GO:0004952 | dopamine neurotra      | 1/72 | 0.039960213 | 0.112688321 | 1 |
| MF | GO:0005351 | carbohydrate:prot      | 1/72 | 0.039960213 | 0.112688321 | 1 |
| MF | GO:0016176 | superoxide-generat     | 1/72 | 0.039960213 | 0.112688321 | 1 |
| MF | GO:0016803 | ether hydrolase acti   | 1/72 | 0.039960213 | 0.112688321 | 1 |
| MF | GO:0030957 | Tat protein binding    | 1/72 | 0.039960213 | 0.112688321 | 1 |
| MF | GO:0005536 | glucose binding        | 1/72 | 0.043868551 | 0.115178168 | 1 |
| MF | GO:0008429 | phosphatidylethano     | 1/72 | 0.043868551 | 0.115178168 | 1 |
| MF | GO:0015643 | toxic substance binc   | 1/72 | 0.043868551 | 0.115178168 | 1 |
| MF | GO:0016801 | hydrolase activity, a  | 1/72 | 0.043868551 | 0.115178168 | 1 |
| MF | GO:0042910 | xenobiotic transmer    | 1/72 | 0.043868551 | 0.115178168 | 1 |

|      |            |                       |           |             |             |       |
|------|------------|-----------------------|-----------|-------------|-------------|-------|
| MF   | GO:0140104 | molecular carrier ac  | 1/72      | 0.043868551 | 0.115178168 | 1     |
| MF   | GO:0048018 | receptor ligand acti  | 5/72      | 0.046420443 | 0.115639763 | 5     |
| MF   | GO:0043178 | alcohol binding       | 2/72      | 0.046934161 | 0.115639763 | 2     |
| MF   | GO:0004861 | cyclin-dependent p    | 1/72      | 0.047761198 | 0.115639763 | 1     |
| MF   | GO:0061578 | Lys63-specific deub   | 1/72      | 0.047761198 | 0.115639763 | 1     |
| MF   | GO:0008509 | anion transmembra     | 4/72      | 0.048024529 | 0.115639763 | 4     |
| MF   | GO:0030546 | signaling receptor a  | 5/72      | 0.048145259 | 0.115639763 | 5     |
|      | ID         | Description           | GeneRatio | pvalue      | qvalue      | Count |
| KEGG | hsa04066   | HIF-1 signaling path  | 10/58     | 3.88E-09    | 5.68E-07    | 10    |
| KEGG | hsa00590   | Arachidonic acid me   | 6/58      | 4.22E-06    | 0.000308874 | 6     |
| KEGG | hsa04216   | Ferroptosis           | 5/58      | 9.69E-06    | 0.000472604 | 5     |
| KEGG | hsa01230   | Biosynthesis of amir  | 5/58      | 0.000185417 | 0.006144058 | 5     |
| KEGG | hsa05140   | Leishmaniasis         | 5/58      | 0.000209959 | 0.006144058 | 5     |
| KEGG | hsa01210   | 2-Oxocarboxylic aci   | 3/58      | 0.00031068  | 0.006645828 | 3     |
| KEGG | hsa05206   | MicroRNAs in cance    | 9/58      | 0.000317948 | 0.006645828 | 9     |
| KEGG | hsa05167   | Kaposi sarcoma-ass    | 7/58      | 0.000418882 | 0.006918154 | 7     |
| KEGG | hsa00270   | Cysteine and methio   | 4/58      | 0.000425541 | 0.006918154 | 4     |
| KEGG | hsa00220   | Arginine biosynthes   | 3/58      | 0.000486281 | 0.007115065 | 3     |
| KEGG | hsa04726   | Serotonergic synaps   | 5/58      | 0.001326515 | 0.017147847 | 5     |
| KEGG | hsa04920   | Adipocytokine sign    | 4/58      | 0.001444142 | 0.017147847 | 4     |
| KEGG | hsa05230   | Central carbon met    | 4/58      | 0.001523568 | 0.017147847 | 4     |
| KEGG | hsa03320   | PPAR signaling path   | 4/58      | 0.002065164 | 0.020144411 | 4     |
| KEGG | hsa05212   | Pancreatic cancer     | 4/58      | 0.002065164 | 0.020144411 | 4     |
| KEGG | hsa04140   | Autophagy - anima     | 5/58      | 0.002865604 | 0.024849615 | 5     |
| KEGG | hsa05418   | Fluid shear stress an | 5/58      | 0.003051034 | 0.024849615 | 5     |
| KEGG | hsa05219   | Bladder cancer        | 3/58      | 0.003057039 | 0.024849615 | 3     |
| KEGG | hsa05205   | Proteoglycans in car  | 6/58      | 0.003295251 | 0.025376174 | 6     |
| KEGG | hsa05235   | PD-L1 expression ar   | 4/58      | 0.003668983 | 0.026841507 | 4     |
| KEGG | hsa05323   | Rheumatoid arthritis  | 4/58      | 0.004295673 | 0.029681869 | 4     |
| KEGG | hsa04657   | IL-17 signaling path  | 4/58      | 0.004462957 | 0.029681869 | 4     |
| KEGG | hsa05163   | Human cytomegalo      | 6/58      | 0.005195922 | 0.033054147 | 6     |
| KEGG | hsa04931   | Insulin resistance    | 4/58      | 0.007284674 | 0.044410949 | 4     |
| KEGG | hsa00480   | Glutathione metabo    | 3/58      | 0.007740369 | 0.045301528 | 3     |
| KEGG | hsa04978   | Mineral absorption    | 3/58      | 0.008916847 | 0.049082137 | 3     |
| KEGG | hsa01200   | Carbon metabolism     | 4/58      | 0.009057243 | 0.049082137 | 4     |

**Table S4 1502 FRLRS in the TCGA-KIRC cohort**

| ferrGene  | lncRNA     | cor         | pvalue   | Regulation |
|-----------|------------|-------------|----------|------------|
| FANCD2    | AC022211.1 | 0.530919434 | 1.58E-40 | postive    |
| HELLS     | AC022211.1 | 0.586423045 | 4.22E-51 | postive    |
| TUBE1     | AC022211.1 | 0.40697442  | 6.43E-23 | postive    |
| ALOX12    | AC022211.1 | 0.59287198  | 1.82E-52 | postive    |
| GABPB1    | AC022211.1 | 0.403895849 | 1.44E-22 | postive    |
| DUOX1     | AC022211.1 | 0.431507926 | 7.45E-26 | postive    |
| ATM       | AC022211.1 | 0.501894755 | 9.82E-36 | postive    |
| FBXW7     | AC022211.1 | 0.433563216 | 4.12E-26 | postive    |
| GPX4      | AL049840.4 | -0.41368485 | 1.07E-23 | negative   |
| BRD4      | AL049840.4 | 0.404703821 | 1.17E-22 | postive    |
| ZNF419    | AL049840.4 | 0.547004397 | 2.17E-43 | postive    |
| VEGFA     | AL049840.4 | 0.4913045   | 4.26E-34 | postive    |
| TUBE1     | AL049840.4 | 0.489617886 | 7.67E-34 | postive    |
| SETD1B    | AL049840.4 | 0.519712463 | 1.27E-38 | postive    |
| ALOX12    | AL049840.4 | 0.478455968 | 3.47E-32 | postive    |
| GABPB1    | AL049840.4 | 0.550646302 | 4.64E-44 | postive    |
| ZEB1      | AL049840.4 | 0.587834163 | 2.13E-51 | postive    |
| MAPK8     | AL049840.4 | 0.523129304 | 3.40E-39 | postive    |
| ATM       | AL049840.4 | 0.520506211 | 9.38E-39 | postive    |
| YY1AP1    | AL049840.4 | 0.469250204 | 7.26E-31 | postive    |
| FBXW7     | AL049840.4 | 0.499332128 | 2.48E-35 | postive    |
| AURKA     | AL021807.1 | 0.400311954 | 3.67E-22 | postive    |
| FANCD2    | AC002116.2 | 0.480192137 | 1.94E-32 | postive    |
| HELLS     | AC002116.2 | 0.434047869 | 3.59E-26 | postive    |
| TFAP2C    | AC002116.2 | 0.458916106 | 1.98E-29 | postive    |
| HBA1      | AC002116.2 | 0.450906945 | 2.37E-28 | postive    |
| HELLS     | AC018695.4 | 0.455291724 | 6.13E-29 | postive    |
| ZNF419    | AC018695.4 | 0.509596034 | 5.82E-37 | postive    |
| VEGFA     | AC018695.4 | 0.400406989 | 3.58E-22 | postive    |
| TUBE1     | AC018695.4 | 0.576242539 | 5.22E-49 | postive    |
| SETD1B    | AC018695.4 | 0.487151209 | 1.80E-33 | postive    |
| ALOX12    | AC018695.4 | 0.588177976 | 1.81E-51 | postive    |
| GABPB1    | AC018695.4 | 0.524119467 | 2.31E-39 | postive    |
| MAPK8     | AC018695.4 | 0.462858012 | 5.68E-30 | postive    |
| LINC00472 | AC018695.4 | 0.535628172 | 2.38E-41 | postive    |
| ATM       | AC018695.4 | 0.624901986 | 1.01E-59 | postive    |
| FBXW7     | AC018695.4 | 0.492888988 | 2.44E-34 | postive    |
| FANCD2    | AP000487.1 | 0.421125951 | 1.39E-24 | postive    |
| HELLS     | AP000487.1 | 0.565368004 | 7.46E-47 | postive    |
| ZNF419    | AP000487.1 | 0.465384344 | 2.53E-30 | postive    |
| TUBE1     | AP000487.1 | 0.516645112 | 4.11E-38 | postive    |
| ALOX12    | AP000487.1 | 0.623405312 | 2.30E-59 | postive    |
| GABPB1    | AP000487.1 | 0.552711417 | 1.92E-44 | postive    |
| MAPK8     | AP000487.1 | 0.41191613  | 1.72E-23 | postive    |
| LINC00472 | AP000487.1 | 0.628281074 | 1.55E-60 | postive    |
| ATM       | AP000487.1 | 0.628041751 | 1.77E-60 | postive    |
| FBXW7     | AP000487.1 | 0.49508592  | 1.13E-34 | postive    |
| KLHL24    | AL139147.1 | 0.415426629 | 6.67E-24 | postive    |
| IREB2     | AL139147.1 | 0.48456876  | 4.38E-33 | postive    |
| GABPB1    | AL139147.1 | 0.458277178 | 2.41E-29 | postive    |
| PIK3CA    | AL139147.1 | 0.481305268 | 1.33E-32 | postive    |
| ZEB1      | AL139147.1 | 0.405163123 | 1.04E-22 | postive    |
| MAPK8     | AL139147.1 | 0.478841829 | 3.05E-32 | postive    |
| LINC00472 | AL139147.1 | 0.6350716   | 3.31E-62 | postive    |
| PRKAA2    | AL139147.1 | 0.424734534 | 5.10E-25 | postive    |
| ATM       | AL139147.1 | 0.521582128 | 6.19E-39 | postive    |

|           |            |             |           |         |
|-----------|------------|-------------|-----------|---------|
| KLHL24    | AL359715.3 | 0.450128348 | 3.01E-28  | postive |
| LINC00472 | AL359715.3 | 0.64764169  | 2.08E-65  | postive |
| ZNF419    | AC008763.1 | 0.423820978 | 6.58E-25  | postive |
| SLC2A12   | AL353152.1 | 0.684767108 | 8.11E-76  | postive |
| PLIN4     | AL353152.1 | 0.416053532 | 5.62E-24  | postive |
| HELLS     | AC008569.2 | 0.514120432 | 1.07E-37  | postive |
| ZNF419    | AC008569.2 | 0.481355274 | 1.31E-32  | postive |
| TUBE1     | AC008569.2 | 0.508726418 | 8.04E-37  | postive |
| ALOX12    | AC008569.2 | 0.615400073 | 1.76E-57  | postive |
| GABPB1    | AC008569.2 | 0.51929023  | 1.50E-38  | postive |
| LINC00472 | AC008569.2 | 0.559805425 | 8.81E-46  | postive |
| ATM       | AC008569.2 | 0.601397525 | 2.57E-54  | postive |
| FBXW7     | AC008569.2 | 0.520051702 | 1.12E-38  | postive |
| PHKG2     | AC009403.1 | 0.417740422 | 3.55E-24  | postive |
| PHKG2     | PARD3-AS1  | 0.494315465 | 1.48E-34  | postive |
| TAZ       | PARD3-AS1  | 0.557475583 | 2.44E-45  | postive |
| SLC2A1    | BX640514.2 | 0.408171701 | 4.68E-23  | postive |
| PROM2     | AC090578.1 | 0.69065974  | 1.29E-77  | postive |
| WIPI1     | RNF157-AS1 | 0.442837038 | 2.71E-27  | postive |
| MTOR      | LINC02175  | 0.410228618 | 2.71E-23  | postive |
| ZNF419    | LINC02175  | 0.409348467 | 3.42E-23  | postive |
| TUBE1     | LINC02175  | 0.457701534 | 2.89E-29  | postive |
| SETD1B    | LINC02175  | 0.43325056  | 4.51E-26  | postive |
| ALOX12    | LINC02175  | 0.602862289 | 1.22E-54  | postive |
| IREB2     | LINC02175  | 0.516172267 | 4.92E-38  | postive |
| SP1       | LINC02175  | 0.42916529  | 1.46E-25  | postive |
| GABPB1    | LINC02175  | 0.466340165 | 1.86E-30  | postive |
| PIK3CA    | LINC02175  | 0.408536934 | 4.25E-23  | postive |
| MAPK8     | LINC02175  | 0.489585981 | 7.76E-34  | postive |
| LINC00472 | LINC02175  | 0.500230385 | 1.79E-35  | postive |
| ATM       | LINC02175  | 0.678135089 | 7.60E-74  | postive |
| FBXW7     | LINC02175  | 0.410583287 | 2.46E-23  | postive |
| ZNF419    | AC008655.2 | 0.437732329 | 1.23E-26  | postive |
| TUBE1     | AC008655.2 | 0.441454088 | 4.09E-27  | postive |
| ALOX12    | AC008655.2 | 0.582650442 | 2.56E-50  | postive |
| RGS4      | LINC02611  | 0.408044334 | 4.84E-23  | postive |
| FH        | AC118345.1 | 0.460314319 | 1.27E-29  | postive |
| ISCU      | AC118345.1 | 0.558824932 | 1.35E-45  | postive |
| DDIT3     | AC118345.1 | 0.480189828 | 1.94E-32  | postive |
| GPT2      | AC118345.1 | 0.533321923 | 6.05E-41  | postive |
| HERPUD1   | AC118345.1 | 0.481400143 | 1.29E-32  | postive |
| KLHL24    | AC118345.1 | 0.426013899 | 3.56E-25  | postive |
| SLC2A12   | AC118345.1 | 0.524207    | 2.23E-39  | postive |
| GOT1      | AC118345.1 | 0.426245033 | 3.33E-25  | postive |
| ATG4D     | AC118345.1 | 0.522880752 | 3.74E-39  | postive |
| MAP1LC3A  | AC118345.1 | 0.401589281 | 2.64E-22  | postive |
| GABARAPL1 | AC118345.1 | 0.778978591 | 6.25E-111 | postive |
| WIPI2     | AC118345.1 | 0.556948928 | 3.07E-45  | postive |
| BAP1      | AC118345.1 | 0.401247869 | 2.88E-22  | postive |
| LPIN1     | AC118345.1 | 0.568978929 | 1.47E-47  | postive |
| KLHL24    | AC095055.1 | 0.441045952 | 4.62E-27  | postive |
| IREB2     | AC095055.1 | 0.465686792 | 2.30E-30  | postive |
| GABPB1    | AC095055.1 | 0.453824838 | 9.66E-29  | postive |
| PIK3CA    | AC095055.1 | 0.443653555 | 2.13E-27  | postive |
| KRAS      | AC095055.1 | 0.41997511  | 1.92E-24  | postive |
| MAPK8     | AC095055.1 | 0.498958531 | 2.83E-35  | postive |
| LINC00472 | AC095055.1 | 0.588426633 | 1.60E-51  | postive |
| PRKAA2    | AC095055.1 | 0.407744125 | 5.25E-23  | postive |

|           |            |             |          |         |
|-----------|------------|-------------|----------|---------|
| PRKAA1    | AC095055.1 | 0.519544541 | 1.36E-38 | postive |
| SLC1A4    | AC026369.2 | 0.449186798 | 4.01E-28 | postive |
| ZEB1      | AC026369.2 | 0.482233649 | 9.70E-33 | postive |
| EPAS1     | AC026369.2 | 0.444631262 | 1.59E-27 | postive |
| HELLS     | AC009704.2 | 0.54710045  | 2.08E-43 | postive |
| TUBE1     | AC009704.2 | 0.481200073 | 1.38E-32 | postive |
| ALOX12    | AC009704.2 | 0.478684071 | 3.22E-32 | postive |
| GABPB1    | AC009704.2 | 0.508276261 | 9.50E-37 | postive |
| LINC00472 | AC009704.2 | 0.486688965 | 2.11E-33 | postive |
| ATM       | AC009704.2 | 0.715969009 | 7.51E-86 | postive |
| FBXW7     | AC009704.2 | 0.473662673 | 1.71E-31 | postive |
| ZNF419    | OGFR-AS1   | 0.428259623 | 1.88E-25 | postive |
| ALOX12    | OGFR-AS1   | 0.477706064 | 4.46E-32 | postive |
| PHKG2     | OGFR-AS1   | 0.525916362 | 1.15E-39 | postive |
| ULK1      | OGFR-AS1   | 0.401312514 | 2.83E-22 | postive |
| TAZ       | OGFR-AS1   | 0.565051926 | 8.60E-47 | postive |
| ZNF419    | AC015871.3 | 0.5050121   | 3.16E-36 | postive |
| TUBE1     | AC015871.3 | 0.561872514 | 3.54E-46 | postive |
| ALOX12    | AC015871.3 | 0.579744588 | 1.01E-49 | postive |
| GABPB1    | AC015871.3 | 0.512981644 | 1.64E-37 | postive |
| LINC00472 | AC015871.3 | 0.528056005 | 4.93E-40 | postive |
| LPIN1     | AC015871.3 | 0.413889854 | 1.01E-23 | postive |
| ATM       | AC015871.3 | 0.468323105 | 9.80E-31 | postive |
| BRD4      | AC010809.2 | 0.441472397 | 4.07E-27 | postive |
| ZNF419    | AC010809.2 | 0.598979193 | 8.71E-54 | postive |
| TUBE1     | AC010809.2 | 0.500770584 | 1.47E-35 | postive |
| SETD1B    | AC010809.2 | 0.411491084 | 1.93E-23 | postive |
| ALOX12    | AC010809.2 | 0.463110775 | 5.24E-30 | postive |
| GABPB1    | AC010809.2 | 0.433018936 | 4.83E-26 | postive |
| PHKG2     | AC010809.2 | 0.511414413 | 2.96E-37 | postive |
| TAZ       | AC010809.2 | 0.630920325 | 3.51E-61 | postive |
| FBXW7     | AC010809.2 | 0.413664048 | 1.08E-23 | postive |
| TUBE1     | AP002840.2 | 0.435377481 | 2.44E-26 | postive |
| ALOX12    | AP002840.2 | 0.527653296 | 5.78E-40 | postive |
| MTOR      | AC007637.1 | 0.514164862 | 1.05E-37 | postive |
| ISCU      | AC007637.1 | 0.416902341 | 4.46E-24 | postive |
| ACSL3     | AC007637.1 | 0.488186933 | 1.26E-33 | postive |
| ZNF419    | AC007637.1 | 0.401525688 | 2.68E-22 | postive |
| KLHL24    | AC007637.1 | 0.686787159 | 1.98E-76 | postive |
| MAP3K5    | AC007637.1 | 0.454166489 | 8.69E-29 | postive |
| EIF2AK4   | AC007637.1 | 0.425303009 | 4.34E-25 | postive |
| IREB2     | AC007637.1 | 0.570787503 | 6.44E-48 | postive |
| GABPB1    | AC007637.1 | 0.410744644 | 2.36E-23 | postive |
| PIK3CA    | AC007637.1 | 0.543921215 | 7.90E-43 | postive |
| KRAS      | AC007637.1 | 0.43118582  | 8.18E-26 | postive |
| SLC38A1   | AC007637.1 | 0.404439993 | 1.25E-22 | postive |
| ATG7      | AC007637.1 | 0.406505761 | 7.28E-23 | postive |
| GABARAPL1 | AC007637.1 | 0.51577438  | 5.73E-38 | postive |
| MAPK8     | AC007637.1 | 0.408342505 | 4.48E-23 | postive |
| LINC00472 | AC007637.1 | 0.703311736 | 1.27E-81 | postive |
| PRKAA2    | AC007637.1 | 0.406033469 | 8.24E-23 | postive |
| PRKAA1    | AC007637.1 | 0.446642249 | 8.66E-28 | postive |
| LPIN1     | AC007637.1 | 0.651009748 | 2.71E-66 | postive |
| ATM       | AC007637.1 | 0.559467953 | 1.02E-45 | postive |
| TFAP2C    | AC008429.1 | 0.491506437 | 3.97E-34 | postive |
| HBA1      | AC008429.1 | 0.446002238 | 1.05E-27 | postive |
| ALOX12    | AC005006.1 | 0.416113094 | 5.53E-24 | postive |
| ACSL4     | CASC9      | 0.486554319 | 2.22E-33 | postive |



|           |            |              |           |          |
|-----------|------------|--------------|-----------|----------|
| GABPB1    | AC005746.2 | 0.413628381  | 1.09E-23  | postive  |
| NOX1      | AC092354.1 | 0.486521769  | 2.24E-33  | postive  |
| BECN1     | AC092354.1 | -0.431248962 | 8.03E-26  | negative |
| ALOX12    | AC022916.1 | 0.426712365  | 2.92E-25  | postive  |
| BRD4      | AL031714.1 | 0.492505899  | 2.80E-34  | postive  |
| ZNF419    | AL031714.1 | 0.556934333  | 3.09E-45  | postive  |
| VEGFA     | AL031714.1 | 0.556317436  | 4.05E-45  | postive  |
| TUBE1     | AL031714.1 | 0.544868977  | 5.32E-43  | postive  |
| SETD1B    | AL031714.1 | 0.535183155  | 2.85E-41  | postive  |
| DRD4      | AL031714.1 | 0.458628771  | 2.16E-29  | postive  |
| ALOX12    | AL031714.1 | 0.644932376  | 1.05E-64  | postive  |
| PHKG2     | AL031714.1 | 0.477810884  | 4.31E-32  | postive  |
| TAZ       | AL031714.1 | 0.609234652  | 4.54E-56  | postive  |
| HELLS     | TTN-AS1    | 0.58883438   | 1.31E-51  | postive  |
| ZNF419    | TTN-AS1    | 0.445337763  | 1.28E-27  | postive  |
| TUBE1     | TTN-AS1    | 0.587072955  | 3.08E-51  | postive  |
| ALOX12    | TTN-AS1    | 0.540366887  | 3.44E-42  | postive  |
| GABPB1    | TTN-AS1    | 0.634706215  | 4.08E-62  | postive  |
| ATG7      | TTN-AS1    | 0.432533525  | 5.55E-26  | postive  |
| MAPK8     | TTN-AS1    | 0.464920259  | 2.94E-30  | postive  |
| LINC00472 | TTN-AS1    | 0.589668002  | 8.76E-52  | postive  |
| ATM       | TTN-AS1    | 0.791717326  | 5.00E-117 | postive  |
| FBXW7     | TTN-AS1    | 0.605639889  | 2.93E-55  | postive  |
| TFAP2C    | AC009509.4 | 0.480779854  | 1.59E-32  | postive  |
| HBA1      | AC009509.4 | 0.497299267  | 5.12E-35  | postive  |
| TFAP2C    | AL023881.1 | 0.479924719  | 2.12E-32  | postive  |
| HBA1      | AL023881.1 | 0.55416734   | 1.03E-44  | postive  |
| SAT1      | LINC01480  | 0.437518844  | 1.31E-26  | postive  |
| ZNF419    | AC110285.2 | 0.500910085  | 1.40E-35  | postive  |
| VEGFA     | AC110285.2 | 0.513294947  | 1.46E-37  | postive  |
| TUBE1     | AC110285.2 | 0.502084351  | 9.17E-36  | postive  |
| ALOX12    | AC110285.2 | 0.496574     | 6.64E-35  | postive  |
| PHKG2     | AC110285.2 | 0.454043375  | 9.03E-29  | postive  |
| TAZ       | AC110285.2 | 0.600855353  | 3.38E-54  | postive  |
| HELLS     | AC105036.3 | 0.559258435  | 1.12E-45  | postive  |
| TUBE1     | AC105036.3 | 0.424112938  | 6.07E-25  | postive  |
| ALOX12    | AC105036.3 | 0.437446908  | 1.33E-26  | postive  |
| GABPB1    | AC105036.3 | 0.526745601  | 8.27E-40  | postive  |
| LINC00472 | AC105036.3 | 0.654218123  | 3.81E-67  | postive  |
| ATM       | AC105036.3 | 0.645118353  | 9.38E-65  | postive  |
| FBXW7     | AC105036.3 | 0.427096515  | 2.62E-25  | postive  |
| ZNF419    | AC138956.2 | 0.479964114  | 2.09E-32  | postive  |
| TUBE1     | AC138956.2 | 0.529412945  | 2.88E-40  | postive  |
| SETD1B    | AC138956.2 | 0.419823652  | 2.00E-24  | postive  |
| ALOX12    | AC138956.2 | 0.606569203  | 1.81E-55  | postive  |
| LINC00472 | AC138956.2 | 0.482029721  | 1.04E-32  | postive  |
| ATM       | AC138956.2 | 0.57262894   | 2.77E-48  | postive  |
| HSF1      | AC016065.1 | 0.438107647  | 1.10E-26  | postive  |
| OTUB1     | AC016065.1 | 0.406879724  | 6.59E-23  | postive  |
| PHKG2     | AC016065.1 | 0.48171478   | 1.16E-32  | postive  |
| MAPK1     | AC016065.1 | -0.423488358 | 7.22E-25  | negative |
| BRD4      | AL031600.1 | 0.407042143  | 6.32E-23  | postive  |
| ZNF419    | AL031600.1 | 0.509997307  | 5.02E-37  | postive  |
| TUBE1     | AL031600.1 | 0.481807526  | 1.12E-32  | postive  |
| SETD1B    | AL031600.1 | 0.495831061  | 8.64E-35  | postive  |
| ALOX12    | AL031600.1 | 0.633707566  | 7.22E-62  | postive  |
| PHKG2     | AL031600.1 | 0.436594164  | 1.71E-26  | postive  |
| TAZ       | AL031600.1 | 0.470714208  | 4.50E-31  | postive  |

|           |            |              |           |          |
|-----------|------------|--------------|-----------|----------|
| FH        | LINC00323  | 0.513925221  | 1.15E-37  | postive  |
| ISCU      | LINC00323  | 0.586825817  | 3.47E-51  | postive  |
| ATP5MC3   | LINC00323  | 0.427675209  | 2.22E-25  | postive  |
| SLC2A8    | LINC00323  | 0.419551793  | 2.15E-24  | postive  |
| SLC2A12   | LINC00323  | 0.467224841  | 1.40E-30  | postive  |
| GOT1      | LINC00323  | 0.539224876  | 5.50E-42  | postive  |
| ATG4D     | LINC00323  | 0.500144704  | 1.85E-35  | postive  |
| GABARAPL2 | LINC00323  | 0.61759524   | 5.42E-58  | postive  |
| GABARAPL1 | LINC00323  | 0.532503397  | 8.40E-41  | postive  |
| WIP12     | LINC00323  | 0.489136998  | 9.07E-34  | postive  |
| LPIN1     | LINC00323  | 0.455779675  | 5.27E-29  | postive  |
| HELLS     | AL121672.1 | 0.459471999  | 1.66E-29  | postive  |
| KLHL24    | AL121672.1 | 0.533032351  | 6.79E-41  | postive  |
| TUBE1     | AL121672.1 | 0.406295386  | 7.69E-23  | postive  |
| IREB2     | AL121672.1 | 0.43436474   | 3.27E-26  | postive  |
| GABPB1    | AL121672.1 | 0.567629785  | 2.70E-47  | postive  |
| PIK3CA    | AL121672.1 | 0.463979498  | 3.97E-30  | postive  |
| ATG7      | AL121672.1 | 0.440273862  | 5.80E-27  | postive  |
| MAPK8     | AL121672.1 | 0.41715075   | 4.17E-24  | postive  |
| LINC00472 | AL121672.1 | 0.869644608  | 9.48E-167 | postive  |
| TGFBR1    | AL121672.1 | 0.407295586  | 5.91E-23  | postive  |
| ATM       | AL121672.1 | 0.66663587   | 1.51E-70  | postive  |
| FBXW7     | AL121672.1 | 0.442475558  | 3.02E-27  | postive  |
| MUC1      | LINC01896  | 0.531952731  | 1.05E-40  | postive  |
| SLC2A1    | LINC01896  | 0.402377162  | 2.15E-22  | postive  |
| NCOA4     | AC017104.1 | -0.439352246 | 7.62E-27  | negative |
| PHKG2     | AC017104.1 | 0.531094714  | 1.48E-40  | postive  |
| TAZ       | AC017104.1 | 0.628197777  | 1.62E-60  | postive  |
| HELLS     | AL442067.1 | 0.546843739  | 2.32E-43  | postive  |
| ALOX12    | AL442067.1 | 0.466248798  | 1.92E-30  | postive  |
| GABPB1    | AL442067.1 | 0.4888982    | 9.85E-34  | postive  |
| LINC00472 | AL442067.1 | 0.560366992  | 6.88E-46  | postive  |
| ATM       | AL442067.1 | 0.609893985  | 3.22E-56  | postive  |
| FBXW7     | AL442067.1 | 0.443594449  | 2.16E-27  | postive  |
| OXSR1     | AC004943.2 | 0.449684646  | 3.44E-28  | postive  |
| IREB2     | AC004943.2 | 0.524519166  | 1.98E-39  | postive  |
| SP1       | AC004943.2 | 0.445416188  | 1.25E-27  | postive  |
| PIK3CA    | AC004943.2 | 0.475892648  | 8.17E-32  | postive  |
| MAPK1     | AC004943.2 | 0.446533489  | 8.95E-28  | postive  |
| MAPK8     | AC004943.2 | 0.447134452  | 7.47E-28  | postive  |
| LINC00472 | AC004943.2 | 0.401345184  | 2.81E-22  | postive  |
| PRKAA2    | AC004943.2 | 0.45913308   | 1.85E-29  | postive  |
| ATM       | AC004943.2 | 0.461513671  | 8.70E-30  | postive  |
| SIRT1     | AC004943.2 | 0.404475503  | 1.24E-22  | postive  |
| TFAP2C    | LINC01715  | 0.44497899   | 1.43E-27  | postive  |
| HBA1      | LINC01715  | 0.444240723  | 1.78E-27  | postive  |
| ALOX12    | AC005962.1 | 0.471755504  | 3.20E-31  | postive  |
| TAZ       | AC005962.1 | 0.438255274  | 1.05E-26  | postive  |
| TFAP2C    | AC138230.1 | 0.548099972  | 1.37E-43  | postive  |
| HBA1      | AC138230.1 | 0.492705106  | 2.61E-34  | postive  |
| DUOX1     | AC138230.1 | 0.410680281  | 2.40E-23  | postive  |
| ISCU      | LINC00239  | 0.400428053  | 3.56E-22  | postive  |
| ATG4D     | LINC00239  | 0.424019289  | 6.23E-25  | postive  |
| TUBE1     | AC010883.1 | 0.4715138    | 3.47E-31  | postive  |
| DRD4      | AC010883.1 | 0.428390846  | 1.82E-25  | postive  |
| ALOX12    | AC010883.1 | 0.514192876  | 1.04E-37  | postive  |
| PHKG2     | AC010883.1 | 0.636101323  | 1.83E-62  | postive  |
| TAZ       | AC010883.1 | 0.763633378  | 4.19E-104 | postive  |

|           |            |              |          |          |
|-----------|------------|--------------|----------|----------|
| IL33      | AC104260.1 | 0.453147294  | 1.19E-28 | postive  |
| GABPB1    | AC104260.1 | 0.516385157  | 4.54E-38 | postive  |
| ZEB1      | AC104260.1 | 0.400137115  | 3.84E-22 | postive  |
| LINC00472 | AC104260.1 | 0.519620644  | 1.32E-38 | postive  |
| FBXW7     | AC104260.1 | 0.401279133  | 2.86E-22 | postive  |
| PTGS2     | CFAP58-DT  | 0.477769587  | 4.37E-32 | postive  |
| SLC2A3    | CFAP58-DT  | 0.418770597  | 2.67E-24 | postive  |
| ZNF419    | AP001107.8 | 0.423449313  | 7.30E-25 | postive  |
| VEGFA     | AP001107.8 | 0.542394644  | 1.49E-42 | postive  |
| TUBE1     | AP001107.8 | 0.414797165  | 7.91E-24 | postive  |
| SETD1B    | AP001107.8 | 0.426738886  | 2.90E-25 | postive  |
| ALOX12    | AP001107.8 | 0.479661517  | 2.31E-32 | postive  |
| TAZ       | AP001107.8 | 0.495779436  | 8.80E-35 | postive  |
| ZNF419    | AL359091.3 | 0.409948971  | 2.92E-23 | postive  |
| TUBE1     | AL359091.3 | 0.419759579  | 2.03E-24 | postive  |
| ALOX12    | AL359091.3 | 0.450263678  | 2.89E-28 | postive  |
| TFAP2C    | AL359091.3 | 0.414344049  | 8.95E-24 | postive  |
| VEGFA     | AC021683.1 | 0.413569466  | 1.10E-23 | postive  |
| HIC1      | AC021683.1 | 0.414784516  | 7.94E-24 | postive  |
| ZEB1      | AC021683.1 | 0.515823388  | 5.62E-38 | postive  |
| EPAS1     | AC021683.1 | 0.491085429  | 4.60E-34 | postive  |
| FANCD2    | AC007728.2 | 0.428287368  | 1.87E-25 | postive  |
| PML       | AC007728.2 | 0.487537516  | 1.58E-33 | postive  |
| GCH1      | AC007728.2 | 0.549177931  | 8.67E-44 | postive  |
| NCF2      | AC007728.2 | 0.414223688  | 9.24E-24 | postive  |
| CYBB      | AC007728.2 | 0.459753684  | 1.52E-29 | postive  |
| IFNG      | AC007728.2 | 0.669095824  | 3.07E-71 | postive  |
| TNFAIP3   | AC007728.2 | 0.523402997  | 3.06E-39 | postive  |
| HELLS     | AC005838.2 | 0.587696905  | 2.28E-51 | postive  |
| TUBE1     | AC005838.2 | 0.414374805  | 8.87E-24 | postive  |
| ALOX12    | AC005838.2 | 0.502088044  | 9.16E-36 | postive  |
| GABPB1    | AC005838.2 | 0.505250937  | 2.89E-36 | postive  |
| DUOX1     | AC005838.2 | 0.402688459  | 1.98E-22 | postive  |
| ATG7      | AC005838.2 | 0.409288093  | 3.48E-23 | postive  |
| LINC00472 | AC005838.2 | 0.511239046  | 3.16E-37 | postive  |
| ATM       | AC005838.2 | 0.655045779  | 2.28E-67 | postive  |
| FBXW7     | AC005838.2 | 0.468245896  | 1.01E-30 | postive  |
| TFAP2C    | AC096733.2 | 0.596343209  | 3.26E-53 | postive  |
| HBA1      | AC096733.2 | 0.49054052   | 5.56E-34 | postive  |
| LPIN1     | AC096733.2 | 0.459046135  | 1.90E-29 | postive  |
| ACO1      | AC092295.2 | 0.473948728  | 1.56E-31 | postive  |
| BAP1      | AC092295.2 | 0.469680428  | 6.31E-31 | postive  |
| FANCD2    | AC002456.1 | 0.433534621  | 4.16E-26 | postive  |
| JDP2      | AC002456.1 | 0.412796582  | 1.36E-23 | postive  |
| AURKA     | AC002456.1 | 0.412461877  | 1.49E-23 | postive  |
| PHKG2     | AC093458.1 | 0.462556628  | 6.25E-30 | postive  |
| TAZ       | AC093458.1 | 0.416199582  | 5.40E-24 | postive  |
| TRIB3     | AL117332.1 | 0.402689866  | 1.98E-22 | postive  |
| CARS1     | AL117332.1 | 0.436236611  | 1.90E-26 | postive  |
| SIRT1     | AL117332.1 | -0.41737132  | 3.92E-24 | negative |
| PHKG2     | AL138960.1 | 0.410181195  | 2.74E-23 | postive  |
| TAZ       | AL138960.1 | 0.48122616   | 1.37E-32 | postive  |
| MUC1      | AC023669.2 | 0.443967369  | 1.94E-27 | postive  |
| SLC7A5    | AC023669.2 | 0.468975981  | 7.93E-31 | postive  |
| SLC2A1    | AC023669.2 | 0.480491666  | 1.75E-32 | postive  |
| GPX4      | AC007406.4 | -0.408062577 | 4.82E-23 | negative |
| RB1       | AC007406.4 | 0.569741568  | 1.04E-47 | postive  |
| KLHL24    | AC007406.4 | 0.4660334    | 2.05E-30 | postive  |

|           |            |             |           |         |
|-----------|------------|-------------|-----------|---------|
| TUBE1     | AC007406.4 | 0.411474695 | 1.94E-23  | postive |
| MAP3K5    | AC007406.4 | 0.46931664  | 7.10E-31  | postive |
| IREB2     | AC007406.4 | 0.589435521 | 9.80E-52  | postive |
| HMGB1     | AC007406.4 | 0.446429352 | 9.24E-28  | postive |
| SP1       | AC007406.4 | 0.604801432 | 4.51E-55  | postive |
| GABPB1    | AC007406.4 | 0.528202039 | 4.66E-40  | postive |
| PIK3CA    | AC007406.4 | 0.525549887 | 1.32E-39  | postive |
| KRAS      | AC007406.4 | 0.581580733 | 4.26E-50  | postive |
| ZEB1      | AC007406.4 | 0.479420298 | 2.51E-32  | postive |
| MAPK8     | AC007406.4 | 0.565510751 | 7.00E-47  | postive |
| LINC00472 | AC007406.4 | 0.454985275 | 6.74E-29  | postive |
| PRKAA2    | AC007406.4 | 0.487672533 | 1.51E-33  | postive |
| PRKAA1    | AC007406.4 | 0.582943389 | 2.23E-50  | postive |
| ATM       | AC007406.4 | 0.532062762 | 1.00E-40  | postive |
| SIRT1     | AC007406.4 | 0.516910579 | 3.72E-38  | postive |
| HELLS     | TPM1-AS    | 0.449787492 | 3.34E-28  | postive |
| TUBE1     | TPM1-AS    | 0.503610608 | 5.27E-36  | postive |
| ALOX12    | TPM1-AS    | 0.514435896 | 9.50E-38  | postive |
| GABPB1    | TPM1-AS    | 0.507322506 | 1.35E-36  | postive |
| LINC00472 | TPM1-AS    | 0.60297131  | 1.15E-54  | postive |
| ATM       | TPM1-AS    | 0.691348495 | 7.93E-78  | postive |
| FBXW7     | TPM1-AS    | 0.455941959 | 5.01E-29  | postive |
| ALOX12    | AC092718.4 | 0.448059293 | 5.64E-28  | postive |
| TFAP2C    | AC092718.4 | 0.405381663 | 9.79E-23  | postive |
| HELLS     | AL138689.1 | 0.428531595 | 1.74E-25  | postive |
| ZNF419    | AL138689.1 | 0.416091876 | 5.56E-24  | postive |
| KLHL24    | AL138689.1 | 0.44969686  | 3.43E-28  | postive |
| TUBE1     | AL138689.1 | 0.433809716 | 3.84E-26  | postive |
| GABPB1    | AL138689.1 | 0.574365002 | 1.25E-48  | postive |
| PIK3CA    | AL138689.1 | 0.414664659 | 8.20E-24  | postive |
| MAPK8     | AL138689.1 | 0.447793196 | 6.12E-28  | postive |
| LINC00472 | AL138689.1 | 0.805158537 | 6.08E-124 | postive |
| ATM       | AL138689.1 | 0.564150372 | 1.29E-46  | postive |
| FBXW7     | AL138689.1 | 0.471282186 | 3.74E-31  | postive |
| TUBE1     | EIF3J-DT   | 0.450069546 | 3.06E-28  | postive |
| ALOX12    | EIF3J-DT   | 0.499137459 | 2.65E-35  | postive |
| MAPK8     | EIF3J-DT   | 0.407864351 | 5.08E-23  | postive |
| ZNF419    | AL021878.2 | 0.541996804 | 1.76E-42  | postive |
| VEGFA     | AL021878.2 | 0.403633178 | 1.55E-22  | postive |
| TUBE1     | AL021878.2 | 0.534337527 | 4.02E-41  | postive |
| SETD1B    | AL021878.2 | 0.506201232 | 2.04E-36  | postive |
| ALOX12    | AL021878.2 | 0.530250164 | 2.07E-40  | postive |
| LINC00472 | AL021878.2 | 0.44872645  | 4.61E-28  | postive |
| ATM       | AL021878.2 | 0.4725097   | 2.50E-31  | postive |
| HELLS     | AC011466.1 | 0.467865773 | 1.14E-30  | postive |
| ZNF419    | AC011466.1 | 0.478684931 | 3.21E-32  | postive |
| TUBE1     | AC011466.1 | 0.577191015 | 3.35E-49  | postive |
| ALOX12    | AC011466.1 | 0.577839308 | 2.48E-49  | postive |
| GABPB1    | AC011466.1 | 0.52999885  | 2.28E-40  | postive |
| ATM       | AC011466.1 | 0.646045699 | 5.40E-65  | postive |
| FBXW7     | AC011466.1 | 0.537712782 | 1.02E-41  | postive |
| HELLS     | PAX8-AS1   | 0.485504206 | 3.18E-33  | postive |
| TUBE1     | PAX8-AS1   | 0.408595782 | 4.18E-23  | postive |
| GABPB1    | PAX8-AS1   | 0.535606124 | 2.40E-41  | postive |
| ATG7      | PAX8-AS1   | 0.40942932  | 3.35E-23  | postive |
| LINC00472 | PAX8-AS1   | 0.729544595 | 1.19E-90  | postive |
| ATM       | PAX8-AS1   | 0.629564159 | 7.54E-61  | postive |
| FBXW7     | PAX8-AS1   | 0.422064427 | 1.07E-24  | postive |

|           |            |              |          |          |
|-----------|------------|--------------|----------|----------|
| OXSR1     | AC009486.1 | 0.418503839  | 2.88E-24 | postive  |
| VEGFA     | AC009486.1 | 0.53218305   | 9.55E-41 | postive  |
| SETD1B    | AC009486.1 | 0.400532598  | 3.47E-22 | postive  |
| FTL       | AC009486.1 | -0.402073994 | 2.32E-22 | negative |
| ZEB1      | AC009486.1 | 0.581407718  | 4.62E-50 | postive  |
| MAPK8     | AC009486.1 | 0.546389007  | 2.81E-43 | postive  |
| EPAS1     | AC009486.1 | 0.499139498  | 2.65E-35 | postive  |
| ATM       | AC009486.1 | 0.524182701  | 2.26E-39 | postive  |
| YY1AP1    | AC009486.1 | 0.403136354  | 1.76E-22 | postive  |
| SIRT1     | AC009486.1 | 0.43102802   | 8.55E-26 | postive  |
| FBXW7     | AC009486.1 | 0.41125221   | 2.06E-23 | postive  |
| HSF1      | SNHG17     | 0.452562132  | 1.43E-28 | postive  |
| ATF4      | SNHG17     | 0.464756664  | 3.10E-30 | postive  |
| SCP2      | SNHG17     | -0.433071921 | 4.75E-26 | negative |
| CARS1     | SNHG17     | 0.405332488  | 9.91E-23 | postive  |
| NCOA4     | SNHG17     | -0.509008116 | 7.24E-37 | negative |
| PHKG2     | SNHG17     | 0.571215653  | 5.29E-48 | postive  |
| MAPK1     | SNHG17     | -0.423020977 | 8.23E-25 | negative |
| BID       | SNHG17     | 0.407403636  | 5.74E-23 | postive  |
| TAZ       | SNHG17     | 0.60593511   | 2.52E-55 | postive  |
| OXSR1     | AC018647.2 | 0.436486324  | 1.76E-26 | postive  |
| IREB2     | AC018647.2 | 0.441156655  | 4.47E-27 | postive  |
| MAPK8     | AC018647.2 | 0.471487715  | 3.50E-31 | postive  |
| LINC00472 | AL591926.2 | 0.485961834  | 2.72E-33 | postive  |
| HBA1      | AC142472.1 | 0.406975538  | 6.43E-23 | postive  |
| HRAS      | AC142472.1 | 0.648675757  | 1.11E-65 | postive  |
| PHKG2     | AC142472.1 | 0.470128818  | 5.45E-31 | postive  |
| EGLN2     | AC142472.1 | 0.705869656  | 1.85E-82 | postive  |
| TAZ       | AC142472.1 | 0.524940498  | 1.68E-39 | postive  |
| VEGFA     | AL596442.2 | 0.410676069  | 2.40E-23 | postive  |
| HELLS     | AC087222.1 | 0.420198772  | 1.80E-24 | postive  |
| ZNF419    | AC087222.1 | 0.473225587  | 1.97E-31 | postive  |
| TUBE1     | AC087222.1 | 0.512679131  | 1.84E-37 | postive  |
| SETD1B    | AC087222.1 | 0.420652588  | 1.59E-24 | postive  |
| ALOX12    | AC087222.1 | 0.642299955  | 4.97E-64 | postive  |
| GABPB1    | AC087222.1 | 0.468420547  | 9.50E-31 | postive  |
| MAPK8     | AC087222.1 | 0.414471521  | 8.64E-24 | postive  |
| LINC00472 | AC087222.1 | 0.503639482  | 5.21E-36 | postive  |
| ATM       | AC087222.1 | 0.572435889  | 3.03E-48 | postive  |
| FBXW7     | AC087222.1 | 0.466906378  | 1.55E-30 | postive  |
| HSPB1     | CPNE8-AS1  | 0.409318646  | 3.45E-23 | postive  |
| HRAS      | CPNE8-AS1  | 0.444855589  | 1.48E-27 | postive  |
| PHKG2     | CPNE8-AS1  | 0.409075627  | 3.68E-23 | postive  |
| TAZ       | CPNE8-AS1  | 0.416106328  | 5.54E-24 | postive  |
| ZNF419    | LINC00921  | 0.48356395   | 6.17E-33 | postive  |
| VEGFA     | LINC00921  | 0.512209957  | 2.20E-37 | postive  |
| TUBE1     | LINC00921  | 0.488212764  | 1.25E-33 | postive  |
| SETD1B    | LINC00921  | 0.457096094  | 3.49E-29 | postive  |
| ALOX12    | LINC00921  | 0.638429718  | 4.78E-63 | postive  |
| TAZ       | LINC00921  | 0.517465426  | 3.01E-38 | postive  |
| HMGB1     | AC006213.4 | 0.425142994  | 4.54E-25 | postive  |
| GABPB1    | AC006213.4 | 0.464077681  | 3.85E-30 | postive  |
| KRAS      | AC006213.4 | 0.412818218  | 1.35E-23 | postive  |
| MAPK8     | AC006213.4 | 0.425433427  | 4.19E-25 | postive  |
| LINC00472 | AC006213.4 | 0.407361623  | 5.80E-23 | postive  |
| PRKAA1    | AC006213.4 | 0.438928487  | 8.63E-27 | postive  |
| ATM       | AC006213.4 | 0.427635252  | 2.25E-25 | postive  |
| HELLS     | AC009120.3 | 0.438993005  | 8.47E-27 | postive  |

|           |            |             |          |         |
|-----------|------------|-------------|----------|---------|
| ZNF419    | AC009120.3 | 0.523287929 | 3.20E-39 | postive |
| TUBE1     | AC009120.3 | 0.571215606 | 5.29E-48 | postive |
| SETD1B    | AC009120.3 | 0.48599119  | 2.69E-33 | postive |
| ALOX12    | AC009120.3 | 0.674515655 | 8.62E-73 | postive |
| GABPB1    | AC009120.3 | 0.453866676 | 9.53E-29 | postive |
| LINC00472 | AC009120.3 | 0.504643878 | 3.61E-36 | postive |
| ATM       | AC009120.3 | 0.574083633 | 1.42E-48 | postive |
| FBXW7     | AC009120.3 | 0.482279746 | 9.55E-33 | postive |
| JDP2      | AC109479.1 | 0.441862028 | 3.63E-27 | postive |
| HELLS     | C2orf49-DT | 0.420995625 | 1.45E-24 | postive |
| ZNF419    | C2orf49-DT | 0.539002152 | 6.03E-42 | postive |
| VEGFA     | C2orf49-DT | 0.505305888 | 2.83E-36 | postive |
| TUBE1     | C2orf49-DT | 0.659884755 | 1.12E-68 | postive |
| SETD1B    | C2orf49-DT | 0.465856613 | 2.17E-30 | postive |
| DRD4      | C2orf49-DT | 0.420962954 | 1.46E-24 | postive |
| ALOX12    | C2orf49-DT | 0.61304714  | 6.13E-57 | postive |
| GABPB1    | C2orf49-DT | 0.45637603  | 4.38E-29 | postive |
| PHKG2     | C2orf49-DT | 0.463262715 | 4.99E-30 | postive |
| ATM       | C2orf49-DT | 0.453843454 | 9.60E-29 | postive |
| TAZ       | C2orf49-DT | 0.62891994  | 1.08E-60 | postive |
| FBXW7     | C2orf49-DT | 0.410196155 | 2.73E-23 | postive |
| TFAP2C    | AC008946.1 | 0.551498364 | 3.23E-44 | postive |
| HBA1      | AC008946.1 | 0.479019921 | 2.87E-32 | postive |
| HELLS     | AL513190.1 | 0.530361168 | 1.98E-40 | postive |
| ZNF419    | AL513190.1 | 0.494500804 | 1.38E-34 | postive |
| TUBE1     | AL513190.1 | 0.546534995 | 2.64E-43 | postive |
| ALOX12    | AL513190.1 | 0.631246395 | 2.92E-61 | postive |
| GABPB1    | AL513190.1 | 0.580988589 | 5.64E-50 | postive |
| MAPK8     | AL513190.1 | 0.417780184 | 3.51E-24 | postive |
| LINC00472 | AL513190.1 | 0.658238707 | 3.14E-68 | postive |
| ATM       | AL513190.1 | 0.698814276 | 3.57E-80 | postive |
| FBXW7     | AL513190.1 | 0.55973018  | 9.11E-46 | postive |
| HELLS     | AC012676.3 | 0.496206354 | 7.56E-35 | postive |
| ZNF419    | AC012676.3 | 0.439683259 | 6.91E-27 | postive |
| TUBE1     | AC012676.3 | 0.532655448 | 7.90E-41 | postive |
| ALOX12    | AC012676.3 | 0.533670227 | 5.26E-41 | postive |
| GABPB1    | AC012676.3 | 0.531427994 | 1.29E-40 | postive |
| LINC00472 | AC012676.3 | 0.55893825  | 1.29E-45 | postive |
| ATM       | AC012676.3 | 0.617263577 | 6.47E-58 | postive |
| FBXW7     | AC012676.3 | 0.535056525 | 3.00E-41 | postive |
| HSPB1     | LINC01569  | 0.406659818 | 6.99E-23 | postive |
| ALOX12    | LINC01569  | 0.413863306 | 1.02E-23 | postive |
| PHKG2     | LINC01569  | 0.514503363 | 9.26E-38 | postive |
| TAZ       | LINC01569  | 0.592568814 | 2.12E-52 | postive |
| HSPB1     | AL133353.1 | 0.412547432 | 1.45E-23 | postive |
| HELLS     | AC008750.4 | 0.493282263 | 2.13E-34 | postive |
| ZNF419    | AC008750.4 | 0.509737547 | 5.52E-37 | postive |
| TUBE1     | AC008750.4 | 0.595410251 | 5.19E-53 | postive |
| SETD1B    | AC008750.4 | 0.418060018 | 3.25E-24 | postive |
| ALOX12    | AC008750.4 | 0.70454626  | 5.03E-82 | postive |
| GABPB1    | AC008750.4 | 0.507130189 | 1.45E-36 | postive |
| MAPK8     | AC008750.4 | 0.42005916  | 1.87E-24 | postive |
| LINC00472 | AC008750.4 | 0.604956529 | 4.17E-55 | postive |
| ATM       | AC008750.4 | 0.708769626 | 2.03E-83 | postive |
| FBXW7     | AC008750.4 | 0.459612226 | 1.59E-29 | postive |
| HELLS     | AP001381.1 | 0.469845217 | 5.98E-31 | postive |
| TFAP2C    | AP001381.1 | 0.490459416 | 5.72E-34 | postive |
| HBA1      | AP001381.1 | 0.500891773 | 1.41E-35 | postive |

|           |            |             |          |         |
|-----------|------------|-------------|----------|---------|
| DUOX1     | AP001381.1 | 0.440444874 | 5.52E-27 | postive |
| MTOR      | AC073569.2 | 0.490123366 | 6.43E-34 | postive |
| IREB2     | AC073569.2 | 0.424325033 | 5.72E-25 | postive |
| PIK3CA    | AC073569.2 | 0.410178498 | 2.74E-23 | postive |
| ATM       | AC073569.2 | 0.421800356 | 1.16E-24 | postive |
| FANCD2    | LINC00941  | 0.549314483 | 8.18E-44 | postive |
| RGS4      | LINC00941  | 0.462484564 | 6.39E-30 | postive |
| STMN1     | LINC00941  | 0.473633115 | 1.73E-31 | postive |
| RRM2      | LINC00941  | 0.616931095 | 7.74E-58 | postive |
| AURKA     | LINC00941  | 0.569580036 | 1.12E-47 | postive |
| SLC1A5    | LINC00941  | 0.501161422 | 1.28E-35 | postive |
| CARS1     | LINC00941  | 0.433872147 | 3.77E-26 | postive |
| CDKN2A    | LINC00941  | 0.449756317 | 3.37E-28 | postive |
| PANX1     | LINC00941  | 0.519945455 | 1.16E-38 | postive |
| ISCU      | GATA2-AS1  | 0.543342497 | 1.00E-42 | postive |
| ACSL3     | GATA2-AS1  | 0.404902576 | 1.11E-22 | postive |
| KLHL24    | GATA2-AS1  | 0.456493875 | 4.22E-29 | postive |
| ATG4D     | GATA2-AS1  | 0.476843494 | 5.95E-32 | postive |
| MAP1LC3A  | GATA2-AS1  | 0.426274868 | 3.30E-25 | postive |
| GABARAPL2 | GATA2-AS1  | 0.42898205  | 1.53E-25 | postive |
| GABARAPL1 | GATA2-AS1  | 0.632647621 | 1.32E-61 | postive |
| BAP1      | GATA2-AS1  | 0.445606522 | 1.18E-27 | postive |
| LPIN1     | GATA2-AS1  | 0.512178208 | 2.22E-37 | postive |
| ALOX12    | AC138150.2 | 0.418353834 | 3.00E-24 | postive |
| PHKG2     | AC138150.2 | 0.410497354 | 2.52E-23 | postive |
| TAZ       | AC138150.2 | 0.477402821 | 4.94E-32 | postive |
| HELLS     | DGCR11     | 0.432089234 | 6.31E-26 | postive |
| LINC00472 | DGCR11     | 0.426505786 | 3.10E-25 | postive |
| ATM       | DGCR11     | 0.436218636 | 1.91E-26 | postive |
| EIF2S1    | KTN1-AS1   | 0.443130244 | 2.49E-27 | postive |
| TUBE1     | AC114757.1 | 0.400216781 | 3.76E-22 | postive |
| GABPB1    | AC114757.1 | 0.513956443 | 1.14E-37 | postive |
| ZEB1      | AC114757.1 | 0.436691167 | 1.66E-26 | postive |
| MAPK8     | AC114757.1 | 0.413277263 | 1.19E-23 | postive |
| LINC00472 | AC114757.1 | 0.441994109 | 3.49E-27 | postive |
| ATM       | AC114757.1 | 0.492204823 | 3.11E-34 | postive |
| FBXW7     | AC114757.1 | 0.400497019 | 3.50E-22 | postive |
| HELLS     | RRN3P2     | 0.507366894 | 1.33E-36 | postive |
| TUBE1     | RRN3P2     | 0.530927145 | 1.58E-40 | postive |
| ALOX12    | RRN3P2     | 0.537245413 | 1.24E-41 | postive |
| GABPB1    | RRN3P2     | 0.540410033 | 3.38E-42 | postive |
| ATM       | RRN3P2     | 0.602617496 | 1.38E-54 | postive |
| TAZ       | RRN3P2     | 0.408333906 | 4.49E-23 | postive |
| FBXW7     | RRN3P2     | 0.568489266 | 1.83E-47 | postive |
| HELLS     | AP001160.4 | 0.524091234 | 2.34E-39 | postive |
| ZNF419    | AP001160.4 | 0.448756297 | 4.57E-28 | postive |
| TUBE1     | AP001160.4 | 0.449631446 | 3.50E-28 | postive |
| ALOX12    | AP001160.4 | 0.494065464 | 1.61E-34 | postive |
| TFAP2C    | AP001160.4 | 0.41162874  | 1.86E-23 | postive |
| GABPB1    | AP001160.4 | 0.446566727 | 8.86E-28 | postive |
| FBXW7     | AP001160.4 | 0.448321856 | 5.21E-28 | postive |
| HELLS     | AC092279.1 | 0.522032941 | 5.20E-39 | postive |
| ZNF419    | AC092279.1 | 0.424590967 | 5.31E-25 | postive |
| KLHL24    | AC092279.1 | 0.471441071 | 3.55E-31 | postive |
| TUBE1     | AC092279.1 | 0.460043618 | 1.39E-29 | postive |
| ALOX12    | AC092279.1 | 0.450058665 | 3.07E-28 | postive |
| IREB2     | AC092279.1 | 0.470510434 | 4.81E-31 | postive |
| GABPB1    | AC092279.1 | 0.567945915 | 2.34E-47 | postive |

|           |            |              |           |          |
|-----------|------------|--------------|-----------|----------|
| PIK3CA    | AC092279.1 | 0.437094432  | 1.48E-26  | postive  |
| ATG7      | AC092279.1 | 0.44417433   | 1.82E-27  | postive  |
| MAPK8     | AC092279.1 | 0.443093733  | 2.51E-27  | postive  |
| LINC00472 | AC092279.1 | 0.772920891  | 3.59E-108 | postive  |
| LPIN1     | AC092279.1 | 0.426978056  | 2.71E-25  | postive  |
| ATM       | AC092279.1 | 0.650486378  | 3.73E-66  | postive  |
| FBXW7     | AC092279.1 | 0.451116027  | 2.22E-28  | postive  |
| LINC00472 | AL355472.2 | 0.493089952  | 2.28E-34  | postive  |
| PCK2      | TMEM246-A  | 0.482472881  | 8.95E-33  | postive  |
| MIOX      | TMEM246-A  | 0.555880136  | 4.89E-45  | postive  |
| TUBE1     | AL591895.1 | 0.410248074  | 2.69E-23  | postive  |
| ALOX12    | AL591895.1 | 0.429675486  | 1.26E-25  | postive  |
| PHKG2     | AL591895.1 | 0.435077141  | 2.66E-26  | postive  |
| TAZ       | AL591895.1 | 0.516356202  | 4.59E-38  | postive  |
| FANCD2    | AC107081.1 | 0.435514187  | 2.34E-26  | postive  |
| HELLS     | AC107081.1 | 0.543830944  | 8.20E-43  | postive  |
| ZNF419    | AC107081.1 | 0.478818163  | 3.07E-32  | postive  |
| TUBE1     | AC107081.1 | 0.489353384  | 8.41E-34  | postive  |
| ALOX12    | AC107081.1 | 0.529882348  | 2.39E-40  | postive  |
| GABPB1    | AC107081.1 | 0.441926756  | 3.56E-27  | postive  |
| PHKG2     | AC107081.1 | 0.414921829  | 7.65E-24  | postive  |
| TAZ       | AC107081.1 | 0.480087851  | 2.01E-32  | postive  |
| FBXW7     | AC107081.1 | 0.492153918  | 3.16E-34  | postive  |
| ZNF419    | AC087500.2 | 0.400156398  | 3.82E-22  | postive  |
| VEGFA     | AC087500.2 | 0.401808297  | 2.49E-22  | postive  |
| TUBE1     | AC087500.2 | 0.418349493  | 3.00E-24  | postive  |
| DRD4      | AC087500.2 | 0.423357391  | 7.49E-25  | postive  |
| ALOX12    | AC087500.2 | 0.564633479  | 1.04E-46  | postive  |
| PHKG2     | AC087500.2 | 0.408393386  | 4.42E-23  | postive  |
| TAZ       | AC087500.2 | 0.529341215  | 2.96E-40  | postive  |
| SLC3A2    | LINC00957  | 0.404836407  | 1.13E-22  | postive  |
| ISCU      | LINC00957  | 0.480726377  | 1.62E-32  | postive  |
| DDIT3     | LINC00957  | 0.442305947  | 3.18E-27  | postive  |
| ATG4D     | LINC00957  | 0.430173118  | 1.09E-25  | postive  |
| GABARAPL1 | LINC00957  | 0.452415299  | 1.49E-28  | postive  |
| ALOX12    | AL358781.2 | 0.469746778  | 6.17E-31  | postive  |
| TAZ       | AL358781.2 | 0.514382328  | 9.70E-38  | postive  |
| TUBE1     | CCNT2-AS1  | 0.432844373  | 5.08E-26  | postive  |
| ALOX12    | CCNT2-AS1  | 0.458345554  | 2.36E-29  | postive  |
| GABPB1    | CCNT2-AS1  | 0.432964277  | 4.90E-26  | postive  |
| MAPK8     | CCNT2-AS1  | 0.45307932   | 1.22E-28  | postive  |
| ATM       | CCNT2-AS1  | 0.513547829  | 1.33E-37  | postive  |
| HSPB1     | AC087239.1 | 0.416991049  | 4.35E-24  | postive  |
| HSF1      | AC087239.1 | 0.410279174  | 2.67E-23  | postive  |
| DRD4      | AC087239.1 | 0.453020915  | 1.24E-28  | postive  |
| HRAS      | AC087239.1 | 0.504721249  | 3.51E-36  | postive  |
| NCOA4     | AC087239.1 | -0.445758814 | 1.13E-27  | negative |
| PHKG2     | AC087239.1 | 0.566141399  | 5.28E-47  | postive  |
| MAP1LC3A  | AC087239.1 | 0.411237973  | 2.07E-23  | postive  |
| EGLN2     | AC087239.1 | 0.467687735  | 1.20E-30  | postive  |
| TAZ       | AC087239.1 | 0.673502075  | 1.69E-72  | postive  |
| TFAP2C    | EDIL3-DT   | 0.429529241  | 1.31E-25  | postive  |
| HBA1      | EDIL3-DT   | 0.448416691  | 5.06E-28  | postive  |
| LINC00472 | NHS-AS1    | 0.444083207  | 1.87E-27  | postive  |
| ZNF419    | TBX2-AS1   | 0.430144061  | 1.10E-25  | postive  |
| HRAS      | TBX2-AS1   | 0.523177767  | 3.34E-39  | postive  |
| MAP1LC3A  | TBX2-AS1   | 0.401441244  | 2.74E-22  | postive  |
| EGLN2     | TBX2-AS1   | 0.602587551  | 1.40E-54  | postive  |



|           |            |              |          |          |
|-----------|------------|--------------|----------|----------|
| TAZ       | TBX2-AS1   | 0.500896128  | 1.41E-35 | postive  |
| ASNS      | Z95115.1   | 0.457828862  | 2.78E-29 | postive  |
| HELLS     | AC011676.1 | 0.479960491  | 2.09E-32 | postive  |
| GABPB1    | AC011676.1 | 0.470158674  | 5.40E-31 | postive  |
| LINC00472 | AC011676.1 | 0.576513574  | 4.60E-49 | postive  |
| ATM       | AC011676.1 | 0.618114157  | 4.10E-58 | postive  |
| FBXW7     | AC011676.1 | 0.41034583   | 2.62E-23 | postive  |
| RB1       | AC009318.3 | 0.408603437  | 4.18E-23 | postive  |
| HELLS     | AC009318.3 | 0.46462735   | 3.23E-30 | postive  |
| GABPB1    | AC009318.3 | 0.439060527  | 8.30E-27 | postive  |
| ACSL4     | AC009318.3 | 0.404980496  | 1.09E-22 | postive  |
| KRAS      | AC009318.3 | 0.448728036  | 4.61E-28 | postive  |
| LINC00472 | AC009318.3 | 0.44921905   | 3.97E-28 | postive  |
| TGFBR1    | AC009318.3 | 0.424996041  | 4.74E-25 | postive  |
| ATM       | AC009318.3 | 0.489611608  | 7.69E-34 | postive  |
| FBXW7     | AC009318.3 | 0.443349225  | 2.33E-27 | postive  |
| BACH1     | AC009318.3 | 0.471675619  | 3.29E-31 | postive  |
| ZNF419    | AL117336.1 | 0.427099432  | 2.62E-25 | postive  |
| TUBE1     | AL117336.1 | 0.471256033  | 3.77E-31 | postive  |
| GABPB1    | AL117336.1 | 0.502514105  | 7.85E-36 | postive  |
| LINC00472 | AL117336.1 | 0.526210421  | 1.02E-39 | postive  |
| ATM       | AL117336.1 | 0.436514115  | 1.75E-26 | postive  |
| FBXW7     | AL117336.1 | 0.476539998  | 6.58E-32 | postive  |
| RB1       | AC005332.6 | 0.514986655  | 7.72E-38 | postive  |
| HSPB1     | AC005332.6 | -0.412313936 | 1.55E-23 | negative |
| IREB2     | AC005332.6 | 0.467960639  | 1.10E-30 | postive  |
| SP1       | AC005332.6 | 0.487186664  | 1.78E-33 | postive  |
| NRAS      | AC005332.6 | 0.453008311  | 1.24E-28 | postive  |
| ULK2      | AC005332.6 | 0.465125397  | 2.75E-30 | postive  |
| MAPK1     | AC005332.6 | 0.450344625  | 2.81E-28 | postive  |
| ZEB1      | AC005332.6 | 0.442128885  | 3.35E-27 | postive  |
| MAPK8     | AC005332.6 | 0.512406683  | 2.04E-37 | postive  |
| PRKAA2    | AC005332.6 | 0.430036609  | 1.14E-25 | postive  |
| EPAS1     | AC005332.6 | 0.405100781  | 1.05E-22 | postive  |
| SIRT1     | AC005332.6 | 0.546831573  | 2.33E-43 | postive  |
| PEBP1     | AC093010.2 | 0.400310858  | 3.67E-22 | postive  |
| EPAS1     | AC097639.1 | 0.495599977  | 9.38E-35 | postive  |
| HELLS     | AL031666.1 | 0.430848935  | 9.01E-26 | postive  |
| GABPB1    | AL031666.1 | 0.431425792  | 7.63E-26 | postive  |
| ATG7      | AL031666.1 | 0.416846508  | 4.53E-24 | postive  |
| LINC00472 | AL031666.1 | 0.52607589   | 1.08E-39 | postive  |
| ATM       | AL031666.1 | 0.564703525  | 1.00E-46 | postive  |
| EGLN2     | AP005432.2 | 0.409445817  | 3.34E-23 | postive  |
| TUBE1     | AC109347.1 | 0.443702524  | 2.09E-27 | postive  |
| PHKG2     | AL121782.1 | 0.480091855  | 2.00E-32 | postive  |
| TAZ       | AL121782.1 | 0.509568654  | 5.88E-37 | postive  |
| HELLS     | AC091887.1 | 0.538900253  | 6.28E-42 | postive  |
| ZNF419    | AC091887.1 | 0.523002187  | 3.57E-39 | postive  |
| TUBE1     | AC091887.1 | 0.538756253  | 6.67E-42 | postive  |
| ALOX12    | AC091887.1 | 0.597946659  | 1.46E-53 | postive  |
| GABPB1    | AC091887.1 | 0.524766743  | 1.80E-39 | postive  |
| MAPK8     | AC091887.1 | 0.41202054   | 1.68E-23 | postive  |
| LINC00472 | AC091887.1 | 0.481746919  | 1.14E-32 | postive  |
| ATM       | AC091887.1 | 0.63626147   | 1.67E-62 | postive  |
| FBXW7     | AC091887.1 | 0.58185633   | 3.74E-50 | postive  |
| ACSL3     | AC008124.1 | 0.416897408  | 4.47E-24 | postive  |
| ZNF419    | AC008124.1 | 0.498319543  | 3.56E-35 | postive  |
| KLHL24    | AC008124.1 | 0.566303622  | 4.90E-47 | postive  |

|           |            |              |           |          |
|-----------|------------|--------------|-----------|----------|
| TUBE1     | AC008124.1 | 0.549958444  | 6.22E-44  | postive  |
| ALOX12    | AC008124.1 | 0.439101167  | 8.20E-27  | postive  |
| IREB2     | AC008124.1 | 0.494664494  | 1.31E-34  | postive  |
| GABPB1    | AC008124.1 | 0.61714047   | 6.92E-58  | postive  |
| EMC2      | AC008124.1 | 0.40212375   | 2.29E-22  | postive  |
| PIK3CA    | AC008124.1 | 0.438530312  | 9.70E-27  | postive  |
| KRAS      | AC008124.1 | 0.481808464  | 1.12E-32  | postive  |
| MAPK8     | AC008124.1 | 0.499274337  | 2.53E-35  | postive  |
| LINC00472 | AC008124.1 | 0.759038565  | 3.67E-102 | postive  |
| PRKAA1    | AC008124.1 | 0.451204358  | 2.16E-28  | postive  |
| LPIN1     | AC008124.1 | 0.48779747   | 1.44E-33  | postive  |
| ATM       | AC008124.1 | 0.52318425   | 3.33E-39  | postive  |
| VEGFA     | AP001625.2 | 0.449690314  | 3.44E-28  | postive  |
| TUBE1     | AP001625.2 | 0.428344824  | 1.84E-25  | postive  |
| ALOX12    | AP001625.2 | 0.52615225   | 1.04E-39  | postive  |
| MAPK8     | AP001625.2 | 0.459478346  | 1.66E-29  | postive  |
| ATM       | AP001625.2 | 0.503302436  | 5.89E-36  | postive  |
| ALOX12    | AC011346.1 | 0.409457568  | 3.33E-23  | postive  |
| ATM       | AC011346.1 | 0.516834505  | 3.83E-38  | postive  |
| IREB2     | MKLN1-AS   | 0.407778589  | 5.20E-23  | postive  |
| ACSL4     | LINC01929  | 0.419545815  | 2.16E-24  | postive  |
| HRAS      | AL732292.2 | 0.487212436  | 1.77E-33  | postive  |
| BRD4      | AL021707.3 | 0.47307151   | 2.08E-31  | postive  |
| ZNF419    | AL021707.3 | 0.504416885  | 3.92E-36  | postive  |
| VEGFA     | AL021707.3 | 0.483962232  | 5.39E-33  | postive  |
| TUBE1     | AL021707.3 | 0.524699859  | 1.84E-39  | postive  |
| SETD1B    | AL021707.3 | 0.56211827   | 3.17E-46  | postive  |
| ALOX12    | AL021707.3 | 0.626691976  | 3.75E-60  | postive  |
| ATM       | AL021707.3 | 0.423909532  | 6.42E-25  | postive  |
| YY1AP1    | AL021707.3 | 0.446895941  | 8.02E-28  | postive  |
| TAZ       | AL021707.3 | 0.560989886  | 5.23E-46  | postive  |
| HELLS     | LINC00476  | 0.436447692  | 1.78E-26  | postive  |
| ZNF419    | LINC00476  | 0.404341838  | 1.29E-22  | postive  |
| TUBE1     | LINC00476  | 0.441024477  | 4.65E-27  | postive  |
| ALOX12    | LINC00476  | 0.522516766  | 4.31E-39  | postive  |
| GABPB1    | LINC00476  | 0.462164844  | 7.08E-30  | postive  |
| ATM       | LINC00476  | 0.481146655  | 1.40E-32  | postive  |
| FBXW7     | LINC00476  | 0.413643069  | 1.08E-23  | postive  |
| TUBE1     | LINC02532  | 0.609199366  | 4.63E-56  | postive  |
| ALOX12    | LINC02532  | 0.503882064  | 4.77E-36  | postive  |
| PRKAA2    | LINC02532  | 0.432279471  | 5.97E-26  | postive  |
| ATM       | LINC02532  | 0.625771993  | 6.25E-60  | postive  |
| ALOX12    | AL031848.1 | 0.500117005  | 1.87E-35  | postive  |
| TFAP2C    | AC027237.2 | 0.570461707  | 7.47E-48  | postive  |
| HBA1      | AC027237.2 | 0.499914451  | 2.01E-35  | postive  |
| DUOX1     | AC027237.2 | 0.423250986  | 7.72E-25  | postive  |
| NCOA4     | HOTAIRM1   | -0.430374166 | 1.03E-25  | negative |
| PHKG2     | HOTAIRM1   | 0.646588707  | 3.90E-65  | postive  |
| SAT1      | HOTAIRM1   | 0.40829032   | 4.54E-23  | postive  |
| MAPK1     | HOTAIRM1   | -0.434411822 | 3.23E-26  | negative |
| TAZ       | HOTAIRM1   | 0.642159793  | 5.40E-64  | postive  |
| PTGS2     | AC002480.1 | 0.440886052  | 4.84E-27  | postive  |
| IL6       | AC002480.1 | 0.702491162  | 2.35E-81  | postive  |
| NCF2      | AP002954.1 | 0.406798114  | 6.74E-23  | postive  |
| FTL       | AP002954.1 | 0.469433208  | 6.84E-31  | postive  |
| HELLS     | MIR181A2HC | 0.52705001   | 7.33E-40  | postive  |
| ZNF419    | MIR181A2HC | 0.4701894    | 5.34E-31  | postive  |
| GABPB1    | MIR181A2HC | 0.4871756    | 1.79E-33  | postive  |

|           |            |             |           |         |
|-----------|------------|-------------|-----------|---------|
| ATM       | MIR181A2HG | 0.412579102 | 1.44E-23  | postive |
| ZNF419    | AL035530.2 | 0.441902191 | 3.58E-27  | postive |
| KLHL24    | AL035530.2 | 0.535153222 | 2.89E-41  | postive |
| TUBE1     | AL035530.2 | 0.547675858 | 1.64E-43  | postive |
| ALOX12    | AL035530.2 | 0.408270345 | 4.56E-23  | postive |
| GABPB1    | AL035530.2 | 0.50379541  | 4.92E-36  | postive |
| PIK3CA    | AL035530.2 | 0.421710124 | 1.19E-24  | postive |
| MAPK8     | AL035530.2 | 0.407575859 | 5.48E-23  | postive |
| LINC00472 | AL035530.2 | 0.797385065 | 7.03E-120 | postive |
| ATM       | AL035530.2 | 0.522813746 | 3.84E-39  | postive |
| FBXW7     | AL035530.2 | 0.435290952 | 2.50E-26  | postive |
| MTOR      | GNG12-AS1  | 0.430804265 | 9.12E-26  | postive |
| KLHL24    | GNG12-AS1  | 0.581783273 | 3.87E-50  | postive |
| TUBE1     | GNG12-AS1  | 0.419323077 | 2.29E-24  | postive |
| MAP3K5    | GNG12-AS1  | 0.419778097 | 2.02E-24  | postive |
| ALOX12    | GNG12-AS1  | 0.41160517  | 1.87E-23  | postive |
| IREB2     | GNG12-AS1  | 0.608324369 | 7.30E-56  | postive |
| GABPB1    | GNG12-AS1  | 0.422529608 | 9.44E-25  | postive |
| PIK3CA    | GNG12-AS1  | 0.525570502 | 1.31E-39  | postive |
| KRAS      | GNG12-AS1  | 0.421119127 | 1.40E-24  | postive |
| MAPK8     | GNG12-AS1  | 0.529594117 | 2.68E-40  | postive |
| LINC00472 | GNG12-AS1  | 0.661219419 | 4.82E-69  | postive |
| PRKAA2    | GNG12-AS1  | 0.521736051 | 5.84E-39  | postive |
| PRKAA1    | GNG12-AS1  | 0.465791943 | 2.22E-30  | postive |
| ATM       | GNG12-AS1  | 0.645358571 | 8.13E-65  | postive |
| KLHL24    | AC010210.1 | 0.594988177 | 6.40E-53  | postive |
| GABPB1    | AC010210.1 | 0.461349044 | 9.17E-30  | postive |
| PIK3CA    | AC010210.1 | 0.437007857 | 1.52E-26  | postive |
| LINC00472 | AC010210.1 | 0.911523857 | 2.24E-209 | postive |
| LPIN1     | AC010210.1 | 0.47393114  | 1.56E-31  | postive |
| ATM       | AC010210.1 | 0.462908697 | 5.59E-30  | postive |
| VEGFA     | AP001189.1 | 0.438721377 | 9.17E-27  | postive |
| SETD1B    | AP001189.1 | 0.406295955 | 7.69E-23  | postive |
| HIC1      | AP001189.1 | 0.446963452 | 7.86E-28  | postive |
| ZEB1      | AP001189.1 | 0.571571118 | 4.50E-48  | postive |
| EPAS1     | AP001189.1 | 0.524872296 | 1.72E-39  | postive |
| FANCD2    | AC009950.1 | 0.449918017 | 3.21E-28  | postive |
| HELLS     | AC009950.1 | 0.475114196 | 1.06E-31  | postive |
| ALOX12    | AC009950.1 | 0.57144993  | 4.76E-48  | postive |
| HBA1      | AC009950.1 | 0.472491071 | 2.51E-31  | postive |
| GABPB1    | AC009950.1 | 0.414458606 | 8.67E-24  | postive |
| DUOX1     | AC009950.1 | 0.400658226 | 3.35E-22  | postive |
| ATM       | AC009950.1 | 0.482432206 | 9.07E-33  | postive |
| FBXW7     | AC009950.1 | 0.459289445 | 1.76E-29  | postive |
| HELLS     | AL022157.1 | 0.567178756 | 3.31E-47  | postive |
| ZNF419    | AL022157.1 | 0.406262526 | 7.76E-23  | postive |
| TUBE1     | AL022157.1 | 0.4946305   | 1.32E-34  | postive |
| ALOX12    | AL022157.1 | 0.536294621 | 1.82E-41  | postive |
| GABPB1    | AL022157.1 | 0.488773181 | 1.03E-33  | postive |
| LINC00472 | AL022157.1 | 0.597472398 | 1.86E-53  | postive |
| ATM       | AL022157.1 | 0.5930257   | 1.69E-52  | postive |
| HELLS     | AC007216.3 | 0.409765317 | 3.06E-23  | postive |
| TFAP2C    | AC007216.3 | 0.51916771  | 1.57E-38  | postive |
| HBA1      | AC007216.3 | 0.469839326 | 5.99E-31  | postive |
| DUOX1     | AC007216.3 | 0.419777856 | 2.02E-24  | postive |
| LINC00472 | AC007216.3 | 0.442108611 | 3.37E-27  | postive |
| ZNF419    | GUSBP11    | 0.403501744 | 1.60E-22  | postive |
| VEGFA     | GUSBP11    | 0.433429388 | 4.29E-26  | postive |

|           |            |              |           |          |
|-----------|------------|--------------|-----------|----------|
| TUBE1     | GUSBP11    | 0.563351299  | 1.84E-46  | postive  |
| SETD1B    | GUSBP11    | 0.419894295  | 1.96E-24  | postive  |
| ALOX12    | GUSBP11    | 0.554908582  | 7.45E-45  | postive  |
| PHKG2     | GUSBP11    | 0.521372441  | 6.72E-39  | postive  |
| TAZ       | GUSBP11    | 0.663323379  | 1.27E-69  | postive  |
| ALOX12    | DNAJC27-AS | 0.40657668   | 7.14E-23  | postive  |
| TFAP2C    | DNAJC27-AS | 0.475601617  | 9.00E-32  | postive  |
| HBA1      | DNAJC27-AS | 0.567529058  | 2.82E-47  | postive  |
| DUOX1     | DNAJC27-AS | 0.44119446   | 4.42E-27  | postive  |
| ALOX12B   | DNAJC27-AS | 0.404466565  | 1.24E-22  | postive  |
| AKR1C1    | AL353751.1 | 0.470571339  | 4.72E-31  | postive  |
| AKR1C2    | AL353751.1 | 0.54938629   | 7.93E-44  | postive  |
| NQO1      | AL353751.1 | 0.436073733  | 1.99E-26  | postive  |
| ATP6V1G2  | AC006449.5 | 0.403699193  | 1.52E-22  | postive  |
| WIP1      | AC006449.5 | 0.489508913  | 7.97E-34  | postive  |
| TFAP2C    | AC130469.1 | 0.564684319  | 1.01E-46  | postive  |
| HBA1      | AC130469.1 | 0.512140561  | 2.25E-37  | postive  |
| DUOX1     | AC130469.1 | 0.408088523  | 4.79E-23  | postive  |
| HELLS     | AL442125.1 | 0.565041507  | 8.64E-47  | postive  |
| BRD4      | AL442125.1 | 0.401590104  | 2.64E-22  | postive  |
| ZNF419    | AL442125.1 | 0.468880314  | 8.18E-31  | postive  |
| TUBE1     | AL442125.1 | 0.49478215   | 1.25E-34  | postive  |
| ALOX12    | AL442125.1 | 0.49408346   | 1.60E-34  | postive  |
| GABPB1    | AL442125.1 | 0.582273638  | 3.07E-50  | postive  |
| LINC00472 | AL442125.1 | 0.651995651  | 1.49E-66  | postive  |
| ATM       | AL442125.1 | 0.584807742  | 9.16E-51  | postive  |
| FBXW7     | AL442125.1 | 0.499666675  | 2.19E-35  | postive  |
| SLC3A2    | AC116407.1 | 0.443315278  | 2.35E-27  | postive  |
| ATG4D     | AC116407.1 | 0.446227794  | 9.82E-28  | postive  |
| HELLS     | AC008759.2 | 0.486135142  | 2.56E-33  | postive  |
| ZNF419    | AC008759.2 | 0.424866779  | 4.91E-25  | postive  |
| TUBE1     | AC008759.2 | 0.464671678  | 3.18E-30  | postive  |
| ALOX12    | AC008759.2 | 0.55451169   | 8.84E-45  | postive  |
| GABPB1    | AC008759.2 | 0.445689428  | 1.15E-27  | postive  |
| ATM       | AC008759.2 | 0.462368929  | 6.63E-30  | postive  |
| FBXW7     | AC008759.2 | 0.45450566   | 7.82E-29  | postive  |
| LPIN1     | LINC01106  | 0.404604207  | 1.20E-22  | postive  |
| VEGFA     | AP000355.1 | 0.531521775  | 1.24E-40  | postive  |
| TUBE1     | AP000355.1 | 0.464415384  | 3.45E-30  | postive  |
| ALOX12    | AP000355.1 | 0.573083342  | 2.25E-48  | postive  |
| ATM       | AP000355.1 | 0.491490391  | 3.99E-34  | postive  |
| HELLS     | AC099811.4 | 0.510022034  | 4.97E-37  | postive  |
| KLHL24    | AC099811.4 | 0.433438915  | 4.28E-26  | postive  |
| ALOX12    | AC099811.4 | 0.400328975  | 3.65E-22  | postive  |
| GABPB1    | AC099811.4 | 0.520334096  | 1.00E-38  | postive  |
| LINC00472 | AC099811.4 | 0.793718503  | 5.04E-118 | postive  |
| ATM       | AC099811.4 | 0.573010765  | 2.32E-48  | postive  |
| FBXW7     | AC099811.4 | 0.425736873  | 3.85E-25  | postive  |
| ZNF419    | AL513320.1 | 0.416487259  | 4.99E-24  | postive  |
| TUBE1     | AL513320.1 | 0.419270953  | 2.33E-24  | postive  |
| DRD4      | AL513320.1 | 0.405970268  | 8.38E-23  | postive  |
| ALOX12    | AL513320.1 | 0.537025641  | 1.35E-41  | postive  |
| NCOA4     | AL513320.1 | -0.420289173 | 1.76E-24  | negative |
| PHKG2     | AL513320.1 | 0.598740116  | 9.82E-54  | postive  |
| TAZ       | AL513320.1 | 0.7425274    | 1.60E-95  | postive  |
| RGS4      | H19        | 0.640915418  | 1.12E-63  | postive  |
| KLHL24    | AC004837.2 | 0.593047978  | 1.67E-52  | postive  |
| IREB2     | AC004837.2 | 0.423988788  | 6.28E-25  | postive  |

|           |            |             |           |         |
|-----------|------------|-------------|-----------|---------|
| GABPB1    | AC004837.2 | 0.478661496 | 3.24E-32  | postive |
| PIK3CA    | AC004837.2 | 0.480737213 | 1.61E-32  | postive |
| KRAS      | AC004837.2 | 0.432456323 | 5.68E-26  | postive |
| LINC00472 | AC004837.2 | 0.918341033 | 2.58E-218 | postive |
| LPIN1     | AC004837.2 | 0.4580155   | 2.62E-29  | postive |
| ATM       | AC004837.2 | 0.451436813 | 2.01E-28  | postive |
| ISCU      | AC013472.1 | 0.440804602 | 4.96E-27  | postive |
| SLC2A8    | AC013472.1 | 0.508222981 | 9.69E-37  | postive |
| ATG4D     | AC013472.1 | 0.516039334 | 5.18E-38  | postive |
| GABARAPL1 | AC013472.1 | 0.445465629 | 1.23E-27  | postive |
| LPIN1     | AC013472.1 | 0.488658841 | 1.07E-33  | postive |
| TFAP2C    | AL137002.1 | 0.480374752 | 1.82E-32  | postive |
| HELLS     | AC044781.1 | 0.524423545 | 2.05E-39  | postive |
| GABPB1    | AC044781.1 | 0.513308426 | 1.45E-37  | postive |
| ATG7      | AC044781.1 | 0.464998201 | 2.86E-30  | postive |
| LINC00472 | AC044781.1 | 0.597278002 | 2.05E-53  | postive |
| ATM       | AC044781.1 | 0.693803565 | 1.37E-78  | postive |
| FBXW7     | AC044781.1 | 0.442297106 | 3.19E-27  | postive |
| TFAP2C    | AC114939.1 | 0.573463055 | 1.89E-48  | postive |
| HBA1      | AC114939.1 | 0.522225703 | 4.83E-39  | postive |
| DUOX1     | AC114939.1 | 0.423890288 | 6.46E-25  | postive |
| HELLS     | AP005899.1 | 0.568834652 | 1.56E-47  | postive |
| ZNF419    | AP005899.1 | 0.499074287 | 2.72E-35  | postive |
| TUBE1     | AP005899.1 | 0.548190119 | 1.32E-43  | postive |
| ALOX12    | AP005899.1 | 0.670110579 | 1.58E-71  | postive |
| GABPB1    | AP005899.1 | 0.567847442 | 2.45E-47  | postive |
| MAPK8     | AP005899.1 | 0.445792601 | 1.12E-27  | postive |
| LINC00472 | AP005899.1 | 0.617592796 | 5.42E-58  | postive |
| ATM       | AP005899.1 | 0.689353223 | 3.27E-77  | postive |
| FBXW7     | AP005899.1 | 0.534510802 | 3.75E-41  | postive |
| HELLS     | AC007292.2 | 0.492437556 | 2.86E-34  | postive |
| ZNF419    | AC007292.2 | 0.420416364 | 1.70E-24  | postive |
| TUBE1     | AC007292.2 | 0.552017824 | 2.58E-44  | postive |
| ALOX12    | AC007292.2 | 0.611707668 | 1.24E-56  | postive |
| GABPB1    | AC007292.2 | 0.466941349 | 1.53E-30  | postive |
| LINC00472 | AC007292.2 | 0.436708055 | 1.65E-26  | postive |
| ATM       | AC007292.2 | 0.668637294 | 4.13E-71  | postive |
| FBXW7     | AC007292.2 | 0.472619888 | 2.41E-31  | postive |
| ZNF419    | OCIAD1-AS1 | 0.471168901 | 3.88E-31  | postive |
| KLHL24    | OCIAD1-AS1 | 0.446438758 | 9.21E-28  | postive |
| TUBE1     | OCIAD1-AS1 | 0.499126632 | 2.66E-35  | postive |
| GABPB1    | OCIAD1-AS1 | 0.494710784 | 1.29E-34  | postive |
| LINC00472 | OCIAD1-AS1 | 0.654896202 | 2.51E-67  | postive |
| LPIN1     | OCIAD1-AS1 | 0.411481515 | 1.94E-23  | postive |
| ATM       | OCIAD1-AS1 | 0.401434552 | 2.74E-22  | postive |
| FBXW7     | OCIAD1-AS1 | 0.420451145 | 1.68E-24  | postive |
| HELLS     | AC034229.4 | 0.566530875 | 4.43E-47  | postive |
| ZNF419    | AC034229.4 | 0.404703838 | 1.17E-22  | postive |
| TUBE1     | AC034229.4 | 0.529821994 | 2.45E-40  | postive |
| ALOX12    | AC034229.4 | 0.430541486 | 9.83E-26  | postive |
| GABPB1    | AC034229.4 | 0.529072371 | 3.30E-40  | postive |
| LINC00472 | AC034229.4 | 0.578589908 | 1.74E-49  | postive |
| ATM       | AC034229.4 | 0.62437512  | 1.35E-59  | postive |
| FBXW7     | AC034229.4 | 0.458867824 | 2.01E-29  | postive |
| TF        | LINC01914  | 0.440033937 | 6.23E-27  | postive |
| ALOX12    | LINC00910  | 0.482407437 | 9.15E-33  | postive |
| DUOX1     | LINC00910  | 0.400051345 | 3.92E-22  | postive |
| HELLS     | Z68871.1   | 0.456176663 | 4.66E-29  | postive |

|           |            |             |           |         |
|-----------|------------|-------------|-----------|---------|
| MTOR      | Z68871.1   | 0.566089536 | 5.40E-47  | postive |
| ACSL3     | Z68871.1   | 0.408119386 | 4.75E-23  | postive |
| ZNF419    | Z68871.1   | 0.41850939  | 2.87E-24  | postive |
| KLHL24    | Z68871.1   | 0.632032446 | 1.87E-61  | postive |
| TUBE1     | Z68871.1   | 0.430161113 | 1.10E-25  | postive |
| MAP3K5    | Z68871.1   | 0.50826443  | 9.54E-37  | postive |
| EIF2AK4   | Z68871.1   | 0.446852865 | 8.13E-28  | postive |
| IREB2     | Z68871.1   | 0.628188862 | 1.63E-60  | postive |
| GABPB1    | Z68871.1   | 0.577182206 | 3.37E-49  | postive |
| PIK3CA    | Z68871.1   | 0.630495628 | 4.46E-61  | postive |
| KRAS      | Z68871.1   | 0.405045095 | 1.07E-22  | postive |
| ATG7      | Z68871.1   | 0.551080553 | 3.86E-44  | postive |
| MAPK8     | Z68871.1   | 0.533104121 | 6.60E-41  | postive |
| LINC00472 | Z68871.1   | 0.687526397 | 1.18E-76  | postive |
| PRKAA2    | Z68871.1   | 0.499744345 | 2.13E-35  | postive |
| PRKAA1    | Z68871.1   | 0.54648603  | 2.70E-43  | postive |
| TGFBR1    | Z68871.1   | 0.463415795 | 4.75E-30  | postive |
| LPIN1     | Z68871.1   | 0.438458975 | 9.91E-27  | postive |
| TLR4      | Z68871.1   | 0.464817444 | 3.04E-30  | postive |
| ATM       | Z68871.1   | 0.800048872 | 2.99E-121 | postive |
| FBXW7     | Z68871.1   | 0.606893372 | 1.53E-55  | postive |
| BACH1     | Z68871.1   | 0.452089949 | 1.65E-28  | postive |
| VEGFA     | AC044849.1 | 0.459344734 | 1.73E-29  | postive |
| ALOX12    | AC044849.1 | 0.45077132  | 2.47E-28  | postive |
| TAZ       | AC044849.1 | 0.576425891 | 4.79E-49  | postive |
| PHKG2     | AC068722.2 | 0.479893458 | 2.14E-32  | postive |
| TAZ       | AC068722.2 | 0.552398545 | 2.19E-44  | postive |
| HELLS     | AL021707.8 | 0.404980282 | 1.09E-22  | postive |
| BRD4      | AL021707.8 | 0.433867313 | 3.78E-26  | postive |
| ZNF419    | AL021707.8 | 0.50834442  | 9.26E-37  | postive |
| TUBE1     | AL021707.8 | 0.510184384 | 4.68E-37  | postive |
| ALOX12    | AL021707.8 | 0.553286497 | 1.50E-44  | postive |
| GABPB1    | AL021707.8 | 0.419013747 | 2.50E-24  | postive |
| PHKG2     | AL021707.8 | 0.437589197 | 1.28E-26  | postive |
| ATM       | AL021707.8 | 0.47439075  | 1.34E-31  | postive |
| TAZ       | AL021707.8 | 0.554929169 | 7.38E-45  | postive |
| FBXW7     | AL021707.8 | 0.494599613 | 1.34E-34  | postive |
| HELLS     | AC073389.3 | 0.422905182 | 8.50E-25  | postive |
| ZNF419    | AC073389.3 | 0.427792699 | 2.15E-25  | postive |
| TUBE1     | AC073389.3 | 0.481959862 | 1.06E-32  | postive |
| DRD4      | AC073389.3 | 0.402928755 | 1.86E-22  | postive |
| ALOX12    | AC073389.3 | 0.558907544 | 1.31E-45  | postive |
| PHKG2     | AC073389.3 | 0.545762201 | 3.66E-43  | postive |
| TAZ       | AC073389.3 | 0.569335776 | 1.25E-47  | postive |
| HELLS     | AL662844.3 | 0.482445052 | 9.03E-33  | postive |
| ZNF419    | AL662844.3 | 0.482425959 | 9.09E-33  | postive |
| TUBE1     | AL662844.3 | 0.640101716 | 1.80E-63  | postive |
| ALOX12    | AL662844.3 | 0.738265667 | 6.83E-94  | postive |
| GABPB1    | AL662844.3 | 0.478361574 | 3.58E-32  | postive |
| ATM       | AL662844.3 | 0.629402831 | 8.25E-61  | postive |
| FBXW7     | AL662844.3 | 0.435481988 | 2.36E-26  | postive |
| ZNF419    | LINC01011  | 0.404861889 | 1.12E-22  | postive |
| VEGFA     | LINC01011  | 0.520619403 | 8.98E-39  | postive |
| TUBE1     | LINC01011  | 0.481084557 | 1.43E-32  | postive |
| ALOX12    | LINC01011  | 0.56247626  | 2.71E-46  | postive |
| TAZ       | LINC01011  | 0.500718571 | 1.50E-35  | postive |
| FANCD2    | AL022316.1 | 0.435475425 | 2.37E-26  | postive |
| ALOX12    | AL022316.1 | 0.419628388 | 2.11E-24  | postive |

|           |            |              |           |          |
|-----------|------------|--------------|-----------|----------|
| TFAP2C    | AL022316.1 | 0.409292108  | 3.48E-23  | postive  |
| HELLS     | AC074138.1 | 0.530753932  | 1.69E-40  | postive  |
| ZNF419    | AC074138.1 | 0.553358255  | 1.45E-44  | postive  |
| KLHL24    | AC074138.1 | 0.448957543  | 4.30E-28  | postive  |
| TUBE1     | AC074138.1 | 0.56325558   | 1.92E-46  | postive  |
| ALOX12    | AC074138.1 | 0.601022763  | 3.10E-54  | postive  |
| IREB2     | AC074138.1 | 0.419321     | 2.30E-24  | postive  |
| GABPB1    | AC074138.1 | 0.606688281  | 1.71E-55  | postive  |
| MAPK8     | AC074138.1 | 0.449395475  | 3.76E-28  | postive  |
| LINC00472 | AC074138.1 | 0.761934486  | 2.22E-103 | postive  |
| ATM       | AC074138.1 | 0.712419119  | 1.22E-84  | postive  |
| FBXW7     | AC074138.1 | 0.524866576  | 1.73E-39  | postive  |
| PEBP1     | AC022034.1 | -0.444295751 | 1.75E-27  | negative |
| HELLS     | AC004466.2 | 0.543120871  | 1.10E-42  | postive  |
| ZNF419    | AC004466.2 | 0.438796213  | 8.97E-27  | postive  |
| TUBE1     | AC004466.2 | 0.482581592  | 8.62E-33  | postive  |
| ALOX12    | AC004466.2 | 0.523510961  | 2.93E-39  | postive  |
| GABPB1    | AC004466.2 | 0.541764736  | 1.93E-42  | postive  |
| LINC00472 | AC004466.2 | 0.514249049  | 1.02E-37  | postive  |
| ATM       | AC004466.2 | 0.698044412  | 6.28E-80  | postive  |
| FBXW7     | AC004466.2 | 0.523799436  | 2.62E-39  | postive  |
| LINC00472 | AL512306.3 | 0.430032246  | 1.14E-25  | postive  |
| ATM       | AL512306.3 | 0.465771917  | 2.23E-30  | postive  |
| HELLS     | AC087286.2 | 0.512944863  | 1.67E-37  | postive  |
| IREB2     | AC087286.2 | 0.463222882  | 5.05E-30  | postive  |
| GABPB1    | AC087286.2 | 0.595704701  | 4.48E-53  | postive  |
| PIK3CA    | AC087286.2 | 0.474829185  | 1.16E-31  | postive  |
| ATG7      | AC087286.2 | 0.486726989  | 2.09E-33  | postive  |
| ZEB1      | AC087286.2 | 0.430461202  | 1.01E-25  | postive  |
| MAPK8     | AC087286.2 | 0.477225168  | 5.24E-32  | postive  |
| LINC00472 | AC087286.2 | 0.666941417  | 1.24E-70  | postive  |
| PRKAA2    | AC087286.2 | 0.403571917  | 1.57E-22  | postive  |
| PRKAA1    | AC087286.2 | 0.403051265  | 1.80E-22  | postive  |
| ATM       | AC087286.2 | 0.765684804  | 5.49E-105 | postive  |
| FBXW7     | AC087286.2 | 0.531175134  | 1.43E-40  | postive  |
| BACH1     | AC087286.2 | 0.436600799  | 1.71E-26  | postive  |
| GPX4      | GIHCG      | 0.505796052  | 2.37E-36  | postive  |
| HSPB1     | GIHCG      | 0.481247903  | 1.36E-32  | postive  |
| HSF1      | GIHCG      | 0.409890135  | 2.96E-23  | postive  |
| STAT3     | GIHCG      | -0.40590303  | 8.53E-23  | negative |
| OTUB1     | GIHCG      | 0.454737952  | 7.28E-29  | postive  |
| RPL8      | GIHCG      | 0.436064612  | 2.00E-26  | postive  |
| PHKG2     | GIHCG      | 0.500093459  | 1.88E-35  | postive  |
| BECN1     | GIHCG      | -0.410325788 | 2.64E-23  | negative |
| ZEB1      | GIHCG      | -0.438102376 | 1.10E-26  | negative |
| EPAS1     | GIHCG      | -0.477439876 | 4.88E-32  | negative |
| ZNF419    | AL035252.3 | 0.430598755  | 9.67E-26  | postive  |
| PHKG2     | AL035252.3 | 0.436008261  | 2.03E-26  | postive  |
| TAZ       | AL035252.3 | 0.467589744  | 1.24E-30  | postive  |
| ISCU      | CA3-AS1    | 0.625964763  | 5.61E-60  | postive  |
| ATG4D     | CA3-AS1    | 0.50717699   | 1.43E-36  | postive  |
| MAP1LC3A  | CA3-AS1    | 0.424056756  | 6.16E-25  | postive  |
| GABARAPL2 | CA3-AS1    | 0.496165883  | 7.67E-35  | postive  |
| GABARAPL1 | CA3-AS1    | 0.464354512  | 3.52E-30  | postive  |
| TFAP2C    | AC098487.1 | 0.427869989  | 2.10E-25  | postive  |
| HBA1      | AC098487.1 | 0.495640783  | 9.25E-35  | postive  |
| ZNF419    | AL355385.1 | 0.555012178  | 7.12E-45  | postive  |
| ALOX12    | AL355385.1 | 0.406431774  | 7.42E-23  | postive  |

|           |            |              |           |          |
|-----------|------------|--------------|-----------|----------|
| PHKG2     | AL355385.1 | 0.535230769  | 2.80E-41  | postive  |
| EGLN2     | AL355385.1 | 0.422391047  | 9.81E-25  | postive  |
| TAZ       | AL355385.1 | 0.574731223  | 1.05E-48  | postive  |
| ATG4D     | AC139768.1 | 0.454233397  | 8.51E-29  | postive  |
| MAP1LC3A  | AC139768.1 | 0.416746658  | 4.65E-24  | postive  |
| ALOX12    | FBXL19-AS1 | 0.424733045  | 5.10E-25  | postive  |
| ZNF419    | AC073957.3 | 0.487857192  | 1.41E-33  | postive  |
| VEGFA     | AC073957.3 | 0.415490407  | 6.55E-24  | postive  |
| TUBE1     | AC073957.3 | 0.543709429  | 8.62E-43  | postive  |
| SETD1B    | AC073957.3 | 0.538172244  | 8.46E-42  | postive  |
| ALOX12    | AC073957.3 | 0.680069777  | 2.05E-74  | postive  |
| ATM       | AC073957.3 | 0.511983004  | 2.39E-37  | postive  |
| TAZ       | AC073957.3 | 0.404765741  | 1.15E-22  | postive  |
| FH        | LINC01532  | 0.418575151  | 2.82E-24  | postive  |
| ISCU      | LINC01532  | 0.452954039  | 1.26E-28  | postive  |
| ATP5MC3   | LINC01532  | 0.406391362  | 7.50E-23  | postive  |
| SLC2A8    | LINC01532  | 0.408571819  | 4.21E-23  | postive  |
| GOT1      | LINC01532  | 0.452279458  | 1.56E-28  | postive  |
| ATG4D     | LINC01532  | 0.49936988   | 2.44E-35  | postive  |
| GABARAPL2 | LINC01532  | 0.614227918  | 3.28E-57  | postive  |
| SRXN1     | LINC00958  | 0.48986282   | 7.05E-34  | postive  |
| PRKAA2    | AC092354.2 | 0.402205969  | 2.25E-22  | postive  |
| PRKAA1    | AC092354.2 | 0.428251737  | 1.89E-25  | postive  |
| GPX4      | AC133552.5 | 0.553376065  | 1.44E-44  | postive  |
| HSPB1     | AC133552.5 | 0.462430778  | 6.50E-30  | postive  |
| STAT3     | AC133552.5 | -0.415707396 | 6.18E-24  | negative |
| OTUB1     | AC133552.5 | 0.495472964  | 9.81E-35  | postive  |
| RPL8      | AC133552.5 | 0.466443885  | 1.80E-30  | postive  |
| SLC2A8    | AC133552.5 | 0.406300302  | 7.68E-23  | postive  |
| HBA1      | AC133552.5 | 0.401360121  | 2.80E-22  | postive  |
| NRAS      | AC133552.5 | -0.421837016 | 1.14E-24  | negative |
| HRAS      | AC133552.5 | 0.610979957  | 1.82E-56  | postive  |
| MAP1LC3A  | AC133552.5 | 0.601508953  | 2.42E-54  | postive  |
| ANO6      | AC133552.5 | -0.432909013 | 4.98E-26  | negative |
| EGLN2     | AC133552.5 | 0.578172391  | 2.12E-49  | postive  |
| HELLS     | AC007684.2 | 0.504949498  | 3.23E-36  | postive  |
| KLHL24    | AC007684.2 | 0.471762852  | 3.19E-31  | postive  |
| GABPB1    | AC007684.2 | 0.539294124  | 5.35E-42  | postive  |
| PIK3CA    | AC007684.2 | 0.405197991  | 1.03E-22  | postive  |
| LINC00472 | AC007684.2 | 0.817217227  | 1.27E-130 | postive  |
| ATM       | AC007684.2 | 0.568203711  | 2.08E-47  | postive  |
| FBXW7     | AC007684.2 | 0.439326978  | 7.67E-27  | postive  |
| MUC1      | AC004870.2 | 0.403812464  | 1.48E-22  | postive  |
| SLC7A5    | AC004870.2 | 0.520052776  | 1.12E-38  | postive  |
| HELLS     | AL031705.1 | 0.444136018  | 1.84E-27  | postive  |
| BRD4      | AL031705.1 | 0.406570353  | 7.16E-23  | postive  |
| ZNF419    | AL031705.1 | 0.499171638  | 2.62E-35  | postive  |
| VEGFA     | AL031705.1 | 0.42827714   | 1.87E-25  | postive  |
| TUBE1     | AL031705.1 | 0.584689598  | 9.69E-51  | postive  |
| SETD1B    | AL031705.1 | 0.47726352   | 5.17E-32  | postive  |
| DRD4      | AL031705.1 | 0.409003917  | 3.75E-23  | postive  |
| ALOX12    | AL031705.1 | 0.710180938  | 6.88E-84  | postive  |
| PHKG2     | AL031705.1 | 0.444222307  | 1.79E-27  | postive  |
| ATM       | AL031705.1 | 0.446425095  | 9.25E-28  | postive  |
| TAZ       | AL031705.1 | 0.549055982  | 9.12E-44  | postive  |
| TUBE1     | AL356019.2 | 0.424669439  | 5.19E-25  | postive  |
| ALOX12    | AL356019.2 | 0.554125629  | 1.04E-44  | postive  |
| SP1       | AL356019.2 | 0.469832433  | 6.00E-31  | postive  |



|           |            |             |          |         |
|-----------|------------|-------------|----------|---------|
| MAPK8     | AL356019.2 | 0.425130651 | 4.56E-25 | postive |
| ATM       | AL356019.2 | 0.445992069 | 1.05E-27 | postive |
| BRD4      | ARHGAP27P: | 0.421619102 | 1.22E-24 | postive |
| ZNF419    | ARHGAP27P: | 0.593604572 | 1.27E-52 | postive |
| VEGFA     | ARHGAP27P: | 0.509682535 | 5.64E-37 | postive |
| TUBE1     | ARHGAP27P: | 0.613617854 | 4.53E-57 | postive |
| SETD1B    | ARHGAP27P: | 0.475893967 | 8.16E-32 | postive |
| DRD4      | ARHGAP27P: | 0.411664176 | 1.84E-23 | postive |
| ALOX12    | ARHGAP27P: | 0.659359241 | 1.56E-68 | postive |
| GABPB1    | ARHGAP27P: | 0.421880846 | 1.13E-24 | postive |
| PHKG2     | ARHGAP27P: | 0.469491429 | 6.71E-31 | postive |
| TAZ       | ARHGAP27P: | 0.690398569 | 1.56E-77 | postive |
| FBXW7     | ARHGAP27P: | 0.493031461 | 2.32E-34 | postive |
| LINC00472 | AP002518.2 | 0.550326244 | 5.32E-44 | postive |
| ATM       | AP002518.2 | 0.51482259  | 8.21E-38 | postive |
| HELLS     | AL031775.2 | 0.431370229 | 7.76E-26 | postive |
| ZNF419    | AL031775.2 | 0.515111984 | 7.36E-38 | postive |
| VEGFA     | AL031775.2 | 0.4001427   | 3.83E-22 | postive |
| TUBE1     | AL031775.2 | 0.685405894 | 5.20E-76 | postive |
| ALOX12    | AL031775.2 | 0.624061036 | 1.61E-59 | postive |
| GABPB1    | AL031775.2 | 0.541317636 | 2.32E-42 | postive |
| LINC00472 | AL031775.2 | 0.550304498 | 5.37E-44 | postive |
| ATM       | AL031775.2 | 0.60390675  | 7.14E-55 | postive |
| TAZ       | AL031775.2 | 0.414037504 | 9.72E-24 | postive |
| FBXW7     | AL031775.2 | 0.505553035 | 2.59E-36 | postive |
| TUBE1     | TMEM254-A: | 0.403422516 | 1.64E-22 | postive |
| ALOX12    | TMEM254-A: | 0.40800908  | 4.89E-23 | postive |
| TUBE1     | AC092140.2 | 0.457292944 | 3.29E-29 | postive |
| GABPB1    | AC092140.2 | 0.406289291 | 7.71E-23 | postive |
| LINC00472 | AC092140.2 | 0.462749066 | 5.88E-30 | postive |
| ATM       | AC092140.2 | 0.430465588 | 1.00E-25 | postive |
| ZNF419    | AC024361.1 | 0.435942142 | 2.07E-26 | postive |
| ALOX12    | AC024361.1 | 0.479990719 | 2.07E-32 | postive |
| LINC00472 | AC024361.1 | 0.514648427 | 8.77E-38 | postive |
| ZNF419    | LINC00667  | 0.446884331 | 8.05E-28 | postive |
| VEGFA     | LINC00667  | 0.409671178 | 3.14E-23 | postive |
| TUBE1     | LINC00667  | 0.5215829   | 6.19E-39 | postive |
| SETD1B    | LINC00667  | 0.416412163 | 5.10E-24 | postive |
| ALOX12    | LINC00667  | 0.488639937 | 1.08E-33 | postive |
| GABPB1    | LINC00667  | 0.5283322   | 4.42E-40 | postive |
| MAPK8     | LINC00667  | 0.521156455 | 7.30E-39 | postive |
| ATM       | LINC00667  | 0.543275072 | 1.03E-42 | postive |
| YY1AP1    | LINC00667  | 0.453321215 | 1.13E-28 | postive |
| FANCD2    | AL008582.1 | 0.413635701 | 1.08E-23 | postive |
| HELLS     | AL008582.1 | 0.444798281 | 1.51E-27 | postive |
| ZNF419    | AL008582.1 | 0.459225652 | 1.79E-29 | postive |
| TUBE1     | AL008582.1 | 0.42822723  | 1.90E-25 | postive |
| ALOX12    | AL008582.1 | 0.570878014 | 6.18E-48 | postive |
| PHKG2     | AL008582.1 | 0.481344459 | 1.31E-32 | postive |
| TAZ       | AL008582.1 | 0.551473266 | 3.26E-44 | postive |
| FANCD2    | THUMPD3-A  | 0.507023882 | 1.51E-36 | postive |
| HELLS     | THUMPD3-A  | 0.539690249 | 4.54E-42 | postive |
| ZNF419    | THUMPD3-A  | 0.685119052 | 6.35E-76 | postive |
| TUBE1     | THUMPD3-A  | 0.608748719 | 5.85E-56 | postive |
| ALOX12    | THUMPD3-A  | 0.528304603 | 4.47E-40 | postive |
| GABPB1    | THUMPD3-A  | 0.616062068 | 1.23E-57 | postive |
| LINC00472 | THUMPD3-A  | 0.596754826 | 2.66E-53 | postive |
| LPIN1     | THUMPD3-A  | 0.503174049 | 6.17E-36 | postive |

|           |            |             |           |         |
|-----------|------------|-------------|-----------|---------|
| ATM       | THUMPD3-A  | 0.526968936 | 7.57E-40  | postive |
| TAZ       | THUMPD3-A  | 0.452719394 | 1.36E-28  | postive |
| FBXW7     | THUMPD3-A  | 0.515268239 | 6.94E-38  | postive |
| HELLS     | AC011939.2 | 0.477175429 | 5.33E-32  | postive |
| KLHL24    | AC011939.2 | 0.471368843 | 3.63E-31  | postive |
| IREB2     | AC011939.2 | 0.425012042 | 4.71E-25  | postive |
| GABPB1    | AC011939.2 | 0.548388668 | 1.21E-43  | postive |
| PIK3CA    | AC011939.2 | 0.44420008  | 1.81E-27  | postive |
| ATG7      | AC011939.2 | 0.436656513 | 1.68E-26  | postive |
| MAPK8     | AC011939.2 | 0.408727832 | 4.04E-23  | postive |
| LINC00472 | AC011939.2 | 0.861581261 | 2.99E-160 | postive |
| ATM       | AC011939.2 | 0.671623797 | 5.85E-72  | postive |
| FBXW7     | AC011939.2 | 0.433078467 | 4.74E-26  | postive |
| TFAP2C    | C6orf99    | 0.538001219 | 9.08E-42  | postive |
| HBA1      | C6orf99    | 0.50951642  | 6.00E-37  | postive |
| BRD4      | SNHG20     | 0.40541149  | 9.71E-23  | postive |
| ZNF419    | SNHG20     | 0.546252248 | 2.98E-43  | postive |
| VEGFA     | SNHG20     | 0.582489888 | 2.77E-50  | postive |
| TUBE1     | SNHG20     | 0.579916143 | 9.35E-50  | postive |
| SETD1B    | SNHG20     | 0.437370746 | 1.36E-26  | postive |
| DRD4      | SNHG20     | 0.426920478 | 2.75E-25  | postive |
| ALOX12    | SNHG20     | 0.707209984 | 6.70E-83  | postive |
| GABPB1    | SNHG20     | 0.404800933 | 1.14E-22  | postive |
| ATM       | SNHG20     | 0.42411532  | 6.06E-25  | postive |
| YY1AP1    | SNHG20     | 0.436316233 | 1.85E-26  | postive |
| TAZ       | SNHG20     | 0.613274099 | 5.43E-57  | postive |
| FBXW7     | SNHG20     | 0.430134238 | 1.10E-25  | postive |
| ZNF419    | AFDN-DT    | 0.402751072 | 1.95E-22  | postive |
| VEGFA     | AFDN-DT    | 0.48900648  | 9.49E-34  | postive |
| TUBE1     | AFDN-DT    | 0.439030218 | 8.37E-27  | postive |
| ALOX12    | AFDN-DT    | 0.546301895 | 2.92E-43  | postive |
| HELLS     | HLA-F-AS1  | 0.461338519 | 9.20E-30  | postive |
| ZNF419    | HLA-F-AS1  | 0.493702225 | 1.84E-34  | postive |
| TUBE1     | HLA-F-AS1  | 0.580546614 | 6.95E-50  | postive |
| ALOX12    | HLA-F-AS1  | 0.61609461  | 1.21E-57  | postive |
| GABPB1    | HLA-F-AS1  | 0.452959945 | 1.26E-28  | postive |
| ATM       | HLA-F-AS1  | 0.553261875 | 1.52E-44  | postive |
| FBXW7     | HLA-F-AS1  | 0.423532894 | 7.13E-25  | postive |
| HELLS     | AL590133.1 | 0.441612233 | 3.90E-27  | postive |
| TUBE1     | AL590133.1 | 0.449818244 | 3.31E-28  | postive |
| ALOX12    | AL590133.1 | 0.66344313  | 1.17E-69  | postive |
| ATM       | AL590133.1 | 0.573334392 | 2.00E-48  | postive |
| PHKG2     | AC025171.5 | 0.444629597 | 1.59E-27  | postive |
| TAZ       | AC025171.5 | 0.516888997 | 3.75E-38  | postive |
| ZNF419    | AL136304.1 | 0.502513068 | 7.85E-36  | postive |
| VEGFA     | AL136304.1 | 0.403063084 | 1.80E-22  | postive |
| TUBE1     | AL136304.1 | 0.533284523 | 6.14E-41  | postive |
| ALOX12    | AL136304.1 | 0.55104224  | 3.92E-44  | postive |
| PHKG2     | AL136304.1 | 0.493276098 | 2.13E-34  | postive |
| TAZ       | AL136304.1 | 0.624242025 | 1.45E-59  | postive |
| HELLS     | AC002128.2 | 0.522910987 | 3.70E-39  | postive |
| ALOX12    | AC002128.2 | 0.498012803 | 3.97E-35  | postive |
| TFAP2C    | AC002128.2 | 0.435994275 | 2.04E-26  | postive |
| GABPB1    | AC002128.2 | 0.41370843  | 1.06E-23  | postive |
| DUOX1     | AC002128.2 | 0.450627156 | 2.58E-28  | postive |
| LINC00472 | AC002128.2 | 0.418234017 | 3.10E-24  | postive |
| ATM       | AC002128.2 | 0.482197673 | 9.82E-33  | postive |
| FBXW7     | AC002128.2 | 0.436857627 | 1.58E-26  | postive |

|           |            |              |          |          |
|-----------|------------|--------------|----------|----------|
| HELLS     | AC232271.1 | 0.408000456  | 4.90E-23 | postive  |
| BRD4      | AC232271.1 | 0.436538376  | 1.74E-26 | postive  |
| ZNF419    | AC232271.1 | 0.616281667  | 1.10E-57 | postive  |
| VEGFA     | AC232271.1 | 0.407181643  | 6.09E-23 | postive  |
| TUBE1     | AC232271.1 | 0.571258257  | 5.19E-48 | postive  |
| SETD1B    | AC232271.1 | 0.481650287  | 1.18E-32 | postive  |
| DRD4      | AC232271.1 | 0.412561635  | 1.45E-23 | postive  |
| ALOX12    | AC232271.1 | 0.688877608  | 4.57E-77 | postive  |
| PHKG2     | AC232271.1 | 0.527572329  | 5.97E-40 | postive  |
| TAZ       | AC232271.1 | 0.652288695  | 1.24E-66 | postive  |
| ZNF419    | AC062037.2 | 0.463134972  | 5.20E-30 | postive  |
| TUBE1     | AC062037.2 | 0.492324466  | 2.98E-34 | postive  |
| SETD1B    | AC062037.2 | 0.410376862  | 2.60E-23 | postive  |
| ALOX12    | AC062037.2 | 0.444224663  | 1.79E-27 | postive  |
| LINC00472 | AC062037.2 | 0.412645053  | 1.42E-23 | postive  |
| ATM       | AC062037.2 | 0.426831444  | 2.82E-25 | postive  |
| FBXW7     | AC062037.2 | 0.406187843  | 7.92E-23 | postive  |
| TFAP2C    | LNCTAM34A  | 0.43692523   | 1.55E-26 | postive  |
| ALOX12B   | LNCTAM34A  | 0.483081702  | 7.27E-33 | postive  |
| PEBP1     | AL138826.1 | 0.446016429  | 1.05E-27 | postive  |
| HELLS     | LINC00894  | 0.513659306  | 1.27E-37 | postive  |
| ZNF419    | LINC00894  | 0.536648883  | 1.57E-41 | postive  |
| TUBE1     | LINC00894  | 0.607490957  | 1.13E-55 | postive  |
| ALOX12    | LINC00894  | 0.588086597  | 1.89E-51 | postive  |
| GABPB1    | LINC00894  | 0.548476928  | 1.17E-43 | postive  |
| LINC00472 | LINC00894  | 0.668825034  | 3.66E-71 | postive  |
| ATM       | LINC00894  | 0.600629598  | 3.79E-54 | postive  |
| TAZ       | LINC00894  | 0.420424508  | 1.69E-24 | postive  |
| FBXW7     | LINC00894  | 0.480404331  | 1.80E-32 | postive  |
| HELLS     | AC021739.2 | 0.413816298  | 1.03E-23 | postive  |
| ZNF419    | AC021739.2 | 0.493106012  | 2.26E-34 | postive  |
| TUBE1     | AC021739.2 | 0.435994146  | 2.04E-26 | postive  |
| ALOX12    | AC021739.2 | 0.495582516  | 9.44E-35 | postive  |
| GABPB1    | AC021739.2 | 0.533911214  | 4.77E-41 | postive  |
| LINC00472 | AC021739.2 | 0.424900318  | 4.86E-25 | postive  |
| ATM       | AC021739.2 | 0.585741623  | 5.85E-51 | postive  |
| FBXW7     | AC021739.2 | 0.52566992   | 1.26E-39 | postive  |
| HELLS     | AC011726.2 | 0.466729545  | 1.64E-30 | postive  |
| TUBE1     | AC011726.2 | 0.512876761  | 1.71E-37 | postive  |
| ALOX12    | AC011726.2 | 0.581856919  | 3.74E-50 | postive  |
| GABPB1    | AC011726.2 | 0.440653224  | 5.19E-27 | postive  |
| LINC00472 | AC011726.2 | 0.429978892  | 1.15E-25 | postive  |
| ATM       | AC011726.2 | 0.738327066  | 6.48E-94 | postive  |
| FBXW7     | AC011726.2 | 0.431734281  | 6.99E-26 | postive  |
| MTOR      | PPIC-AS1   | 0.429308312  | 1.40E-25 | postive  |
| ACSL3     | PPIC-AS1   | 0.440618613  | 5.24E-27 | postive  |
| LPIN1     | PPIC-AS1   | 0.440797127  | 4.97E-27 | postive  |
| ZNF419    | AC006064.3 | 0.473001296  | 2.13E-31 | postive  |
| VEGFA     | AC006064.3 | 0.478872262  | 3.02E-32 | postive  |
| TUBE1     | AC006064.3 | 0.459618583  | 1.58E-29 | postive  |
| SETD1B    | AC006064.3 | 0.447692436  | 6.31E-28 | postive  |
| ALOX12    | AC006064.3 | 0.685966379  | 3.52E-76 | postive  |
| TAZ       | AC006064.3 | 0.544164139  | 7.14E-43 | postive  |
| SETD1B    | AP001062.1 | 0.410141511  | 2.77E-23 | postive  |
| ALOX12    | AP001062.1 | 0.444273434  | 1.77E-27 | postive  |
| STAT3     | AC135507.1 | -0.408928827 | 3.83E-23 | negative |
| ISCU      | AC135507.1 | 0.591254653  | 4.03E-52 | postive  |
| TMBIM4    | AC135507.1 | 0.438432184  | 9.98E-27 | postive  |

|           |            |              |          |          |
|-----------|------------|--------------|----------|----------|
| DDIT3     | AC135507.1 | 0.463663844  | 4.39E-30 | postive  |
| ATG4D     | AC135507.1 | 0.494093747  | 1.60E-34 | postive  |
| MAP1LC3A  | AC135507.1 | 0.470101023  | 5.50E-31 | postive  |
| GABARAPL2 | AC135507.1 | 0.472889371  | 2.21E-31 | postive  |
| GABARAPL1 | AC135507.1 | 0.447745426  | 6.21E-28 | postive  |
| LPIN1     | AC135507.1 | 0.423243847  | 7.73E-25 | postive  |
| TFAP2C    | AC108134.2 | 0.534949857  | 3.14E-41 | postive  |
| HBA1      | AC108134.2 | 0.416750166  | 4.65E-24 | postive  |
| DUOX1     | AC108134.2 | 0.412178001  | 1.61E-23 | postive  |
| ZNF419    | AC254562.3 | 0.415967275  | 5.76E-24 | postive  |
| VEGFA     | AC254562.3 | 0.50825563   | 9.57E-37 | postive  |
| TUBE1     | AC254562.3 | 0.462380041  | 6.61E-30 | postive  |
| SETD1B    | AC254562.3 | 0.410602759  | 2.45E-23 | postive  |
| DRD4      | AC254562.3 | 0.420724503  | 1.56E-24 | postive  |
| ALOX12    | AC254562.3 | 0.562844144  | 2.30E-46 | postive  |
| TAZ       | AC254562.3 | 0.641179007  | 9.61E-64 | postive  |
| HELLS     | AC036108.3 | 0.421199674  | 1.37E-24 | postive  |
| ZNF419    | AC036108.3 | 0.499385702  | 2.43E-35 | postive  |
| KLHL24    | AC036108.3 | 0.403015863  | 1.82E-22 | postive  |
| TUBE1     | AC036108.3 | 0.600989853  | 3.15E-54 | postive  |
| ALOX12    | AC036108.3 | 0.500317562  | 1.74E-35 | postive  |
| IREB2     | AC036108.3 | 0.408060794  | 4.82E-23 | postive  |
| GABPB1    | AC036108.3 | 0.612660723  | 7.52E-57 | postive  |
| MAPK8     | AC036108.3 | 0.484593846  | 4.34E-33 | postive  |
| LINC00472 | AC036108.3 | 0.673610414  | 1.57E-72 | postive  |
| ATM       | AC036108.3 | 0.670935382  | 9.20E-72 | postive  |
| FBXW7     | AC036108.3 | 0.526693288  | 8.44E-40 | postive  |
| ZNF419    | AL121772.3 | 0.423751753  | 6.71E-25 | postive  |
| LINC00472 | AL121772.3 | 0.533555353  | 5.50E-41 | postive  |
| HRAS      | AC064836.2 | 0.558816232  | 1.36E-45 | postive  |
| EGLN2     | AC064836.2 | 0.472289115  | 2.69E-31 | postive  |
| CYBB      | AC243960.3 | 0.440372455  | 5.64E-27 | postive  |
| ZNF419    | PTOV1-AS1  | 0.494793886  | 1.25E-34 | postive  |
| VEGFA     | PTOV1-AS1  | 0.44150651   | 4.03E-27 | postive  |
| TUBE1     | PTOV1-AS1  | 0.465911651  | 2.14E-30 | postive  |
| SETD1B    | PTOV1-AS1  | 0.483977982  | 5.36E-33 | postive  |
| ALOX12    | PTOV1-AS1  | 0.507748937  | 1.15E-36 | postive  |
| PHKG2     | PTOV1-AS1  | 0.535734833  | 2.28E-41 | postive  |
| ULK1      | PTOV1-AS1  | 0.419007907  | 2.50E-24 | postive  |
| TAZ       | PTOV1-AS1  | 0.653713879  | 5.19E-67 | postive  |
| HELLS     | AC066613.1 | 0.544275238  | 6.81E-43 | postive  |
| ZNF419    | AC066613.1 | 0.503431799  | 5.62E-36 | postive  |
| TUBE1     | AC066613.1 | 0.630858824  | 3.64E-61 | postive  |
| SETD1B    | AC066613.1 | 0.41406649   | 9.64E-24 | postive  |
| ALOX12    | AC066613.1 | 0.687268399  | 1.42E-76 | postive  |
| GABPB1    | AC066613.1 | 0.548153472  | 1.34E-43 | postive  |
| MAPK8     | AC066613.1 | 0.406508712  | 7.27E-23 | postive  |
| LINC00472 | AC066613.1 | 0.500957319  | 1.38E-35 | postive  |
| ATM       | AC066613.1 | 0.74897134   | 4.73E-98 | postive  |
| FBXW7     | AC066613.1 | 0.542561665  | 1.39E-42 | postive  |
| ZNF419    | AL451050.2 | 0.484104704  | 5.13E-33 | postive  |
| ALOX12    | AL451050.2 | 0.453690366  | 1.01E-28 | postive  |
| NCOA4     | AL451050.2 | -0.413091296 | 1.26E-23 | negative |
| PHKG2     | AL451050.2 | 0.629282463  | 8.83E-61 | postive  |
| ULK1      | AL451050.2 | 0.440524424  | 5.39E-27 | postive  |
| TAZ       | AL451050.2 | 0.717291215  | 2.63E-86 | postive  |
| TUBE1     | AC010175.1 | 0.437206055  | 1.43E-26 | postive  |
| ALOX12    | AC010175.1 | 0.417611674  | 3.67E-24 | postive  |

|           |            |             |           |         |
|-----------|------------|-------------|-----------|---------|
| FBXW7     | AC010175.1 | 0.420028269 | 1.89E-24  | postive |
| HELLS     | AC004884.2 | 0.440116015 | 6.08E-27  | postive |
| KLHL24    | AC004884.2 | 0.495077765 | 1.13E-34  | postive |
| IREB2     | AC004884.2 | 0.423419432 | 7.36E-25  | postive |
| GABPB1    | AC004884.2 | 0.526091991 | 1.07E-39  | postive |
| PIK3CA    | AC004884.2 | 0.453131577 | 1.20E-28  | postive |
| ATG7      | AC004884.2 | 0.405694215 | 9.01E-23  | postive |
| LINC00472 | AC004884.2 | 0.889919836 | 3.24E-185 | postive |
| ATM       | AC004884.2 | 0.62188922  | 5.29E-59  | postive |
| ZNF419    | AC084018.2 | 0.520613172 | 9.00E-39  | postive |
| TUBE1     | AC084018.2 | 0.465748078 | 2.25E-30  | postive |
| SETD1B    | AC084018.2 | 0.57659655  | 4.42E-49  | postive |
| ALOX12    | AC084018.2 | 0.632138492 | 1.76E-61  | postive |
| ATM       | AC084018.2 | 0.406872887 | 6.61E-23  | postive |
| TAZ       | AC084018.2 | 0.412005209 | 1.68E-23  | postive |
| HELLS     | AC006017.1 | 0.444203706 | 1.80E-27  | postive |
| TUBE1     | AC006017.1 | 0.61658999  | 9.29E-58  | postive |
| ALOX12    | AC006017.1 | 0.541210698 | 2.43E-42  | postive |
| GABPB1    | AC006017.1 | 0.408432583 | 4.37E-23  | postive |
| LINC00472 | AC006017.1 | 0.407351621 | 5.82E-23  | postive |
| ATM       | AC006017.1 | 0.533720842 | 5.15E-41  | postive |
| FBXW7     | AC006017.1 | 0.411231766 | 2.07E-23  | postive |
| TFAP2C    | APP-DT     | 0.438328727 | 1.03E-26  | postive |
| HBA1      | APP-DT     | 0.404316375 | 1.29E-22  | postive |
| TUBE1     | HNF1A-AS1  | 0.490171301 | 6.33E-34  | postive |
| ALOX12    | HNF1A-AS1  | 0.615152298 | 2.00E-57  | postive |
| HELLS     | GSN-AS1    | 0.557907696 | 2.02E-45  | postive |
| ZNF419    | GSN-AS1    | 0.409054425 | 3.70E-23  | postive |
| TUBE1     | GSN-AS1    | 0.444850933 | 1.49E-27  | postive |
| ALOX12    | GSN-AS1    | 0.482254253 | 9.64E-33  | postive |
| IREB2     | GSN-AS1    | 0.407101772 | 6.22E-23  | postive |
| GABPB1    | GSN-AS1    | 0.577217409 | 3.31E-49  | postive |
| ATG7      | GSN-AS1    | 0.453869987 | 9.53E-29  | postive |
| MAPK8     | GSN-AS1    | 0.425660564 | 3.93E-25  | postive |
| LINC00472 | GSN-AS1    | 0.688948871 | 4.35E-77  | postive |
| ATM       | GSN-AS1    | 0.698016958 | 6.41E-80  | postive |
| FBXW7     | GSN-AS1    | 0.509980844 | 5.05E-37  | postive |
| NCF2      | AL161785.1 | 0.415965    | 5.76E-24  | postive |
| CYBB      | AL161785.1 | 0.520885643 | 8.10E-39  | postive |
| TLR4      | AL161785.1 | 0.418631577 | 2.78E-24  | postive |
| PHKG2     | AC116407.2 | 0.490824174 | 5.04E-34  | postive |
| TAZ       | AC116407.2 | 0.571209786 | 5.31E-48  | postive |
| BRD4      | HM13-IT1   | 0.4419647   | 3.52E-27  | postive |
| ZNF419    | HM13-IT1   | 0.445884429 | 1.09E-27  | postive |
| TUBE1     | HM13-IT1   | 0.487612325 | 1.54E-33  | postive |
| SETD1B    | HM13-IT1   | 0.46115796  | 9.74E-30  | postive |
| ALOX12    | HM13-IT1   | 0.576818682 | 3.99E-49  | postive |
| PHKG2     | HM13-IT1   | 0.49408179  | 1.61E-34  | postive |
| TAZ       | HM13-IT1   | 0.565429665 | 7.26E-47  | postive |
| FBXW7     | HM13-IT1   | 0.444439797 | 1.68E-27  | postive |
| BRD4      | AC012615.6 | 0.449769195 | 3.35E-28  | postive |
| ZNF419    | AC012615.6 | 0.549111733 | 8.91E-44  | postive |
| VEGFA     | AC012615.6 | 0.546332018 | 2.88E-43  | postive |
| TUBE1     | AC012615.6 | 0.62740213  | 2.53E-60  | postive |
| SETD1B    | AC012615.6 | 0.583386459 | 1.81E-50  | postive |
| DRD4      | AC012615.6 | 0.428973309 | 1.54E-25  | postive |
| ALOX12    | AC012615.6 | 0.757251799 | 2.04E-101 | postive |
| PHKG2     | AC012615.6 | 0.445241989 | 1.32E-27  | postive |

|           |                        |             |          |         |
|-----------|------------------------|-------------|----------|---------|
| ATM       | AC012615.6             | 0.447931567 | 5.87E-28 | postive |
| TAZ       | AC012615.6             | 0.627882998 | 1.93E-60 | postive |
| FBXW7     | AC012615.6             | 0.411419985 | 1.97E-23 | postive |
| HELLS     | NUTM2B-AS              | 0.573003314 | 2.33E-48 | postive |
| TUBE1     | NUTM2B-AS              | 0.487796215 | 1.44E-33 | postive |
| ALOX12    | NUTM2B-AS              | 0.469504127 | 6.68E-31 | postive |
| IREB2     | NUTM2B-AS              | 0.400587759 | 3.42E-22 | postive |
| GABPB1    | NUTM2B-AS              | 0.596477407 | 3.05E-53 | postive |
| MAPK8     | NUTM2B-AS              | 0.48767602  | 1.50E-33 | postive |
| LINC00472 | NUTM2B-AS              | 0.698640146 | 4.06E-80 | postive |
| ATM       | NUTM2B-AS              | 0.730052947 | 7.76E-91 | postive |
| FBXW7     | NUTM2B-AS              | 0.503575139 | 5.33E-36 | postive |
| ZNF419    | AL121987.2             | 0.434181252 | 3.45E-26 | postive |
| VEGFA     | AL121987.2             | 0.55980215  | 8.82E-46 | postive |
| TUBE1     | AL121987.2             | 0.530081596 | 2.21E-40 | postive |
| SETD1B    | AL121987.2             | 0.512412    | 2.03E-37 | postive |
| ALOX12    | AL121987.2             | 0.572575567 | 2.84E-48 | postive |
| ATM       | AL121987.2             | 0.452998992 | 1.25E-28 | postive |
| TAZ       | AL121987.2             | 0.460875266 | 1.07E-29 | postive |
| ZNF419    | AC009812.1             | 0.428949223 | 1.55E-25 | postive |
| TUBE1     | AC009812.1             | 0.42181538  | 1.15E-24 | postive |
| GABPB1    | AC009812.1             | 0.461371973 | 9.10E-30 | postive |
| TAZ       | AC009812.1             | 0.431059672 | 8.48E-26 | postive |
| PHKG2     | AL096865.1             | 0.481791675 | 1.13E-32 | postive |
| TAZ       | AL096865.1             | 0.595984017 | 3.90E-53 | postive |
| HELLS     | AC060766.6             | 0.44557302  | 1.20E-27 | postive |
| TUBE1     | AC060766.6             | 0.414959429 | 7.57E-24 | postive |
| GABPB1    | AC060766.6             | 0.485033308 | 3.73E-33 | postive |
| ATM       | AC060766.6             | 0.554748567 | 7.98E-45 | postive |
| FBXW7     | AC060766.6             | 0.507253839 | 1.39E-36 | postive |
| JDP2      | AC027601.2             | 0.403517926 | 1.60E-22 | postive |
| VEGFA     | AC027601.2             | 0.452277441 | 1.56E-28 | postive |
| MAPK3     | AC027601.2             | 0.450905245 | 2.37E-28 | postive |
| ZEB1      | AC027601.2             | 0.58770484  | 2.27E-51 | postive |
| EPAS1     | AC027601.2             | 0.693093131 | 2.28E-78 | postive |
| GCLC      | DPH6-DT                | 0.412342368 | 1.54E-23 | postive |
| PRKAA2    | DPH6-DT                | 0.451864215 | 1.77E-28 | postive |
| ALOX12    | AC090844.2             | 0.528233537 | 4.60E-40 | postive |
| LPIN1     | AC011450.1             | 0.43489919  | 2.80E-26 | postive |
| ALOX12    | FAM111A-D <sup>-</sup> | 0.457154956 | 3.43E-29 | postive |
| IREB2     | FAM111A-D <sup>-</sup> | 0.431913181 | 6.64E-26 | postive |
| SP1       | FAM111A-D <sup>-</sup> | 0.445377502 | 1.27E-27 | postive |
| ATM       | FAM111A-D <sup>-</sup> | 0.489435897 | 8.17E-34 | postive |
| TUBE1     | AC003956.1             | 0.412400781 | 1.51E-23 | postive |
| SETD1B    | AC003956.1             | 0.428231547 | 1.90E-25 | postive |
| ALOX12    | AC003956.1             | 0.494834377 | 1.23E-34 | postive |
| VEGFA     | LINC00989              | 0.410076064 | 2.82E-23 | postive |
| GABPB1    | LINC00989              | 0.47094019  | 4.18E-31 | postive |
| ZEB1      | LINC00989              | 0.661915878 | 3.10E-69 | postive |
| MAPK8     | LINC00989              | 0.44461131  | 1.60E-27 | postive |
| EPAS1     | LINC00989              | 0.543601826 | 9.02E-43 | postive |
| FBXW7     | LINC00989              | 0.405568401 | 9.32E-23 | postive |
| HELLS     | AC007390.1             | 0.602644895 | 1.36E-54 | postive |
| ZNF419    | AC007390.1             | 0.490526371 | 5.59E-34 | postive |
| TUBE1     | AC007390.1             | 0.585910666 | 5.39E-51 | postive |
| ALOX12    | AC007390.1             | 0.63379436  | 6.88E-62 | postive |
| GABPB1    | AC007390.1             | 0.56577429  | 6.22E-47 | postive |
| MAPK8     | AC007390.1             | 0.415142216 | 7.20E-24 | postive |

|           |            |              |          |          |
|-----------|------------|--------------|----------|----------|
| LINC00472 | AC007390.1 | 0.54052135   | 3.23E-42 | postive  |
| ATM       | AC007390.1 | 0.646074808  | 5.31E-65 | postive  |
| FBXW7     | AC007390.1 | 0.527466179  | 6.22E-40 | postive  |
| LINC00472 | UBE2D3-AS1 | 0.580461046  | 7.23E-50 | postive  |
| BRD4      | AC108134.3 | 0.408628446  | 4.15E-23 | postive  |
| ZNF419    | AC108134.3 | 0.476714018  | 6.21E-32 | postive  |
| VEGFA     | AC108134.3 | 0.4680578    | 1.07E-30 | postive  |
| TUBE1     | AC108134.3 | 0.451053818  | 2.27E-28 | postive  |
| SETD1B    | AC108134.3 | 0.407164331  | 6.12E-23 | postive  |
| ALOX12    | AC108134.3 | 0.519558636  | 1.35E-38 | postive  |
| TAZ       | AC108134.3 | 0.620933181  | 8.90E-59 | postive  |
| ISCU      | AC092142.1 | 0.410609805  | 2.45E-23 | postive  |
| TMBIM4    | AC092142.1 | 0.424036953  | 6.20E-25 | postive  |
| BRD4      | LINC00115  | 0.454531817  | 7.76E-29 | postive  |
| ZNF419    | LINC00115  | 0.5038523    | 4.82E-36 | postive  |
| VEGFA     | LINC00115  | 0.456652901  | 4.01E-29 | postive  |
| TUBE1     | LINC00115  | 0.508066431  | 1.03E-36 | postive  |
| DRD4      | LINC00115  | 0.406229665  | 7.83E-23 | postive  |
| ALOX12    | LINC00115  | 0.635599492  | 2.45E-62 | postive  |
| NCOA4     | LINC00115  | -0.407823637 | 5.14E-23 | negative |
| PHKG2     | LINC00115  | 0.512840724  | 1.73E-37 | postive  |
| TAZ       | LINC00115  | 0.702577129  | 2.20E-81 | postive  |
| BRD4      | AC107375.1 | 0.468840708  | 8.29E-31 | postive  |
| ZNF419    | AC107375.1 | 0.578579706  | 1.75E-49 | postive  |
| VEGFA     | AC107375.1 | 0.451941612  | 1.73E-28 | postive  |
| TUBE1     | AC107375.1 | 0.523736712  | 2.68E-39 | postive  |
| SETD1B    | AC107375.1 | 0.481704823  | 1.16E-32 | postive  |
| DRD4      | AC107375.1 | 0.422671465  | 9.07E-25 | postive  |
| ALOX12    | AC107375.1 | 0.669593349  | 2.22E-71 | postive  |
| GABPB1    | AC107375.1 | 0.444604435  | 1.60E-27 | postive  |
| TAZ       | AC107375.1 | 0.52696003   | 7.60E-40 | postive  |
| FH        | INSYN1-AS1 | 0.493331554  | 2.09E-34 | postive  |
| ISCU      | INSYN1-AS1 | 0.553081339  | 1.64E-44 | postive  |
| ATP5MC3   | INSYN1-AS1 | 0.40544388   | 9.63E-23 | postive  |
| GOT1      | INSYN1-AS1 | 0.471800345  | 3.15E-31 | postive  |
| ATG4D     | INSYN1-AS1 | 0.497781595  | 4.31E-35 | postive  |
| GABARAPL2 | INSYN1-AS1 | 0.561138437  | 4.90E-46 | postive  |
| GABARAPL1 | INSYN1-AS1 | 0.512105849  | 2.28E-37 | postive  |
| TUBE1     | AC008537.2 | 0.490908674  | 4.89E-34 | postive  |
| SETD1B    | AC008537.2 | 0.461457431  | 8.86E-30 | postive  |
| ALOX12    | AC008537.2 | 0.621748146  | 5.71E-59 | postive  |
| IREB2     | AC008537.2 | 0.45899813   | 1.93E-29 | postive  |
| GABPB1    | AC008537.2 | 0.49283679   | 2.49E-34 | postive  |
| MAPK8     | AC008537.2 | 0.482085502  | 1.02E-32 | postive  |
| LINC00472 | AC008537.2 | 0.478210029  | 3.77E-32 | postive  |
| ATM       | AC008537.2 | 0.615175084  | 1.98E-57 | postive  |
| FBXW7     | AC008537.2 | 0.424190352  | 5.94E-25 | postive  |
| ALOX12    | HRAT92     | 0.409333085  | 3.44E-23 | postive  |
| VEGFA     | AC078864.1 | 0.519744535  | 1.26E-38 | postive  |
| TUBE1     | AC078864.1 | 0.531880651  | 1.08E-40 | postive  |
| ALOX12    | AC078864.1 | 0.54002703   | 3.96E-42 | postive  |
| TAZ       | AC078864.1 | 0.466837641  | 1.59E-30 | postive  |
| ZNF419    | AC009404.1 | 0.479746885  | 2.25E-32 | postive  |
| TUBE1     | AC009404.1 | 0.44759604   | 6.49E-28 | postive  |
| ALOX12    | AC009404.1 | 0.545543629  | 4.01E-43 | postive  |
| TAZ       | AC009404.1 | 0.477306795  | 5.10E-32 | postive  |
| HELLS     | AC012531.1 | 0.40283234   | 1.91E-22 | postive  |
| ZNF419    | AC012531.1 | 0.444729424  | 1.54E-27 | postive  |

|           |            |             |           |         |
|-----------|------------|-------------|-----------|---------|
| TUBE1     | AC012531.1 | 0.522096989 | 5.07E-39  | postive |
| SETD1B    | AC012531.1 | 0.508318217 | 9.35E-37  | postive |
| ALOX12    | AC012531.1 | 0.639624342 | 2.38E-63  | postive |
| IREB2     | AC012531.1 | 0.413093118 | 1.25E-23  | postive |
| SP1       | AC012531.1 | 0.482339143 | 9.36E-33  | postive |
| GABPB1    | AC012531.1 | 0.475313811 | 9.90E-32  | postive |
| MAPK8     | AC012531.1 | 0.45186226  | 1.77E-28  | postive |
| LINC00472 | AC012531.1 | 0.480373657 | 1.82E-32  | postive |
| ATM       | AC012531.1 | 0.710667031 | 4.73E-84  | postive |
| FBXW7     | AC012531.1 | 0.448412509 | 5.07E-28  | postive |
| FANCD2    | AL445645.1 | 0.495450391 | 9.89E-35  | postive |
| HELLS     | AL445645.1 | 0.457975504 | 2.65E-29  | postive |
| HELLS     | AC007216.4 | 0.445731369 | 1.14E-27  | postive |
| ZNF419    | AC007216.4 | 0.509185857 | 6.78E-37  | postive |
| KLHL24    | AC007216.4 | 0.47687439  | 5.89E-32  | postive |
| TUBE1     | AC007216.4 | 0.54999516  | 6.12E-44  | postive |
| ALOX12    | AC007216.4 | 0.545481419 | 4.11E-43  | postive |
| GABPB1    | AC007216.4 | 0.56890935  | 1.51E-47  | postive |
| MAPK8     | AC007216.4 | 0.427109696 | 2.61E-25  | postive |
| LINC00472 | AC007216.4 | 0.773685449 | 1.63E-108 | postive |
| ATM       | AC007216.4 | 0.666106325 | 2.13E-70  | postive |
| FBXW7     | AC007216.4 | 0.505734615 | 2.42E-36  | postive |
| MUC1      | MIR31HG    | 0.417437985 | 3.85E-24  | postive |
| CD44      | MIR31HG    | 0.554142095 | 1.04E-44  | postive |
| SOCS1     | MIR31HG    | 0.492972897 | 2.37E-34  | postive |
| TFAP2C    | PCAT1      | 0.516543202 | 4.28E-38  | postive |
| HBA1      | PCAT1      | 0.517023826 | 3.56E-38  | postive |
| DUOX1     | PCAT1      | 0.449853339 | 3.27E-28  | postive |
| BRD4      | AC011462.4 | 0.424763536 | 5.05E-25  | postive |
| ZNF419    | AC011462.4 | 0.553546968 | 1.34E-44  | postive |
| VEGFA     | AC011462.4 | 0.427906913 | 2.08E-25  | postive |
| TUBE1     | AC011462.4 | 0.559308514 | 1.10E-45  | postive |
| DRD4      | AC011462.4 | 0.475005055 | 1.10E-31  | postive |
| ALOX12    | AC011462.4 | 0.65094594  | 2.82E-66  | postive |
| PHKG2     | AC011462.4 | 0.579479178 | 1.15E-49  | postive |
| TAZ       | AC011462.4 | 0.677744704 | 9.89E-74  | postive |
| ZNF419    | AL135960.1 | 0.469386099 | 6.94E-31  | postive |
| VEGFA     | AL135960.1 | 0.412382223 | 1.52E-23  | postive |
| TUBE1     | AL135960.1 | 0.517474471 | 3.00E-38  | postive |
| ALOX12    | AL135960.1 | 0.519210772 | 1.54E-38  | postive |
| GABPB1    | AL135960.1 | 0.506602144 | 1.76E-36  | postive |
| ZEB1      | AL135960.1 | 0.540222652 | 3.65E-42  | postive |
| MAPK8     | AL135960.1 | 0.482514007 | 8.82E-33  | postive |
| ATM       | AL135960.1 | 0.500082609 | 1.89E-35  | postive |
| FBXW7     | AL135960.1 | 0.467686578 | 1.20E-30  | postive |
| FANCD2    | AL683813.1 | 0.427489728 | 2.34E-25  | postive |
| HELLS     | AL683813.1 | 0.49819954  | 3.72E-35  | postive |
| BRD4      | AL683813.1 | 0.405390175 | 9.76E-23  | postive |
| ZNF419    | AL683813.1 | 0.618415205 | 3.48E-58  | postive |
| TUBE1     | AL683813.1 | 0.581401408 | 4.64E-50  | postive |
| ALOX12    | AL683813.1 | 0.617996378 | 4.37E-58  | postive |
| GABPB1    | AL683813.1 | 0.499953011 | 1.98E-35  | postive |
| LINC00472 | AL683813.1 | 0.551697473 | 2.96E-44  | postive |
| LPIN1     | AL683813.1 | 0.408459457 | 4.34E-23  | postive |
| ATM       | AL683813.1 | 0.494121734 | 1.58E-34  | postive |
| FBXW7     | AL683813.1 | 0.487907073 | 1.39E-33  | postive |
| HELLS     | Z99289.1   | 0.46847777  | 9.32E-31  | postive |
| TUBE1     | Z99289.1   | 0.423883156 | 6.47E-25  | postive |



|           |            |             |          |         |
|-----------|------------|-------------|----------|---------|
| GABPB1    | Z99289.1   | 0.558360794 | 1.66E-45 | postive |
| ATG7      | Z99289.1   | 0.407314887 | 5.88E-23 | postive |
| MAPK8     | Z99289.1   | 0.407506812 | 5.59E-23 | postive |
| LINC00472 | Z99289.1   | 0.715684628 | 9.40E-86 | postive |
| ATM       | Z99289.1   | 0.670444056 | 1.27E-71 | postive |
| FBXW7     | Z99289.1   | 0.48598629  | 2.69E-33 | postive |
| FANCD2    | AC087645.2 | 0.407186103 | 6.08E-23 | postive |
| HSPB1     | AL121899.1 | 0.514837163 | 8.16E-38 | postive |
| HBA1      | AL121899.1 | 0.497548073 | 4.69E-35 | postive |
| HRAS      | AL121899.1 | 0.52310783  | 3.43E-39 | postive |
| EGLN2     | AL121899.1 | 0.550739134 | 4.46E-44 | postive |
| FANCD2    | AC023043.3 | 0.445020927 | 1.41E-27 | postive |
| TFAP2C    | AC023043.3 | 0.493203669 | 2.19E-34 | postive |
| HBA1      | AC023043.3 | 0.409639148 | 3.17E-23 | postive |
| FANCD2    | AC004923.4 | 0.419381669 | 2.26E-24 | postive |
| TFAP2C    | AC004923.4 | 0.555872958 | 4.91E-45 | postive |
| HBA1      | AC004923.4 | 0.501628205 | 1.08E-35 | postive |
| DUOX1     | AC004923.4 | 0.414319718 | 9.01E-24 | postive |
| WIPI2     | AL031123.2 | 0.406772344 | 6.78E-23 | postive |
| KLHL24    | AC079380.1 | 0.455791324 | 5.25E-29 | postive |
| GABPB1    | AC079380.1 | 0.461430894 | 8.93E-30 | postive |
| MAPK8     | AC079380.1 | 0.440788256 | 4.98E-27 | postive |
| LINC00472 | AC079380.1 | 0.505358552 | 2.78E-36 | postive |
| PRKAA1    | AC079380.1 | 0.458274915 | 2.42E-29 | postive |
| ATM       | AC079380.1 | 0.534077112 | 4.46E-41 | postive |
| FBXW7     | AC079380.1 | 0.50273706  | 7.24E-36 | postive |
| HELLS     | AP001793.1 | 0.515567644 | 6.19E-38 | postive |
| ZNF419    | AP001793.1 | 0.55367043  | 1.27E-44 | postive |
| TUBE1     | AP001793.1 | 0.616744081 | 8.56E-58 | postive |
| SETD1B    | AP001793.1 | 0.446948478 | 7.90E-28 | postive |
| ALOX12    | AP001793.1 | 0.613093076 | 5.98E-57 | postive |
| GABPB1    | AP001793.1 | 0.59654893  | 2.94E-53 | postive |
| MAPK8     | AP001793.1 | 0.453874222 | 9.51E-29 | postive |
| LINC00472 | AP001793.1 | 0.477353686 | 5.02E-32 | postive |
| ATM       | AP001793.1 | 0.707913815 | 3.92E-83 | postive |
| FBXW7     | AP001793.1 | 0.580611266 | 6.74E-50 | postive |
| ZNF419    | MUC20-OT1  | 0.472882305 | 2.21E-31 | postive |
| KLHL24    | MUC20-OT1  | 0.41894872  | 2.54E-24 | postive |
| TUBE1     | MUC20-OT1  | 0.517616639 | 2.84E-38 | postive |
| ALOX12    | MUC20-OT1  | 0.520641282 | 8.91E-39 | postive |
| LINC00472 | MUC20-OT1  | 0.607217905 | 1.30E-55 | postive |
| ATM       | MUC20-OT1  | 0.441993395 | 3.49E-27 | postive |
| NCF2      | LINC02285  | 0.540167971 | 3.73E-42 | postive |
| CYBB      | LINC02285  | 0.517574111 | 2.89E-38 | postive |
| TSC22D3   | AC012065.2 | 0.400337557 | 3.64E-22 | postive |
| HRAS      | AC012065.2 | 0.458401667 | 2.32E-29 | postive |
| EGLN2     | AC012065.2 | 0.523817315 | 2.60E-39 | postive |
| VEGFA     | AL132780.2 | 0.468986745 | 7.90E-31 | postive |
| ALOX12    | AL132780.2 | 0.500399262 | 1.69E-35 | postive |
| ZNF419    | LGR4-AS1   | 0.419409444 | 2.24E-24 | postive |
| ALOX12    | LGR4-AS1   | 0.430329749 | 1.04E-25 | postive |
| TFAP2C    | LGR4-AS1   | 0.457496776 | 3.08E-29 | postive |
| DUOX1     | LGR4-AS1   | 0.413743395 | 1.05E-23 | postive |
| ALOX12    | AC136475.5 | 0.443862386 | 2.00E-27 | postive |
| HBA1      | AC136475.5 | 0.437308508 | 1.39E-26 | postive |
| MUC1      | AC241644.2 | 0.423389295 | 7.43E-25 | postive |
| HELLS     | GAS5-AS1   | 0.409800755 | 3.04E-23 | postive |
| TUBE1     | GAS5-AS1   | 0.46015216  | 1.34E-29 | postive |

|           |            |             |          |         |
|-----------|------------|-------------|----------|---------|
| GABPB1    | GAS5-AS1   | 0.475783666 | 8.47E-32 | postive |
| LINC00472 | GAS5-AS1   | 0.593629966 | 1.25E-52 | postive |
| ATM       | GAS5-AS1   | 0.527997294 | 5.05E-40 | postive |
| ZNF419    | AC015802.4 | 0.454225242 | 8.53E-29 | postive |
| TUBE1     | AC015802.4 | 0.466220515 | 1.93E-30 | postive |
| ALOX12    | AC015802.4 | 0.576948742 | 3.75E-49 | postive |
| PHKG2     | AC015802.4 | 0.604639099 | 4.90E-55 | postive |
| TAZ       | AC015802.4 | 0.662084324 | 2.79E-69 | postive |
| TFAP2C    | AL139260.1 | 0.409124933 | 3.63E-23 | postive |
| ZNF419    | AL122010.1 | 0.429422259 | 1.35E-25 | postive |
| TUBE1     | AL122010.1 | 0.422439112 | 9.68E-25 | postive |
| ALOX12    | AL122010.1 | 0.478593352 | 3.31E-32 | postive |
| GABPB1    | AL122010.1 | 0.450108834 | 3.02E-28 | postive |
| TUBE1     | AC016727.1 | 0.529468437 | 2.82E-40 | postive |
| ALOX12    | AC016727.1 | 0.540674477 | 3.03E-42 | postive |
| MAPK8     | AC016727.1 | 0.447966526 | 5.80E-28 | postive |
| ATM       | AC016727.1 | 0.529651369 | 2.62E-40 | postive |
| AGPAT3    | AC008991.1 | 0.410468372 | 2.54E-23 | postive |
| ELAVL1    | AC008991.1 | 0.446573009 | 8.85E-28 | postive |
| TUBE1     | ZBTB44-DT  | 0.418583677 | 2.81E-24 | postive |
| ALOX12    | ZBTB44-DT  | 0.482467862 | 8.96E-33 | postive |
| PML       | USP30-AS1  | 0.422320619 | 1.00E-24 | postive |
| GCH1      | USP30-AS1  | 0.483415007 | 6.49E-33 | postive |
| IFNG      | USP30-AS1  | 0.631116933 | 3.14E-61 | postive |
| VDAC2     | SNHG29     | 0.586885303 | 3.37E-51 | postive |
| CHMP5     | SNHG29     | 0.473576461 | 1.76E-31 | postive |
| RPL8      | SNHG29     | 0.451137397 | 2.21E-28 | postive |
| YWHAE     | SNHG29     | 0.464173253 | 3.73E-30 | postive |
| FANCD2    | AC022400.4 | 0.450251883 | 2.90E-28 | postive |
| HELLS     | AC022400.4 | 0.564860962 | 9.36E-47 | postive |
| ZNF419    | AC022400.4 | 0.485031237 | 3.74E-33 | postive |
| TUBE1     | AC022400.4 | 0.589666585 | 8.76E-52 | postive |
| ALOX12    | AC022400.4 | 0.720851729 | 1.52E-87 | postive |
| GABPB1    | AC022400.4 | 0.462420715 | 6.52E-30 | postive |
| ATM       | AC022400.4 | 0.577000658 | 3.66E-49 | postive |
| FBXW7     | AC022400.4 | 0.529767405 | 2.50E-40 | postive |
| NCF2      | AC090559.1 | 0.534311322 | 4.06E-41 | postive |
| MAPK14    | AC090559.1 | 0.433363102 | 4.37E-26 | postive |
| CYBB      | AC090559.1 | 0.695033749 | 5.62E-79 | postive |
| BECN1     | AC090559.1 | 0.41371887  | 1.06E-23 | postive |
| TNFAIP3   | AC090559.1 | 0.433700334 | 3.96E-26 | postive |
| TLR4      | AC090559.1 | 0.518153056 | 2.31E-38 | postive |
| SLC3A2    | LINC02608  | 0.440596407 | 5.28E-27 | postive |
| FH        | LINC02608  | 0.483563917 | 6.17E-33 | postive |
| ISCU      | LINC02608  | 0.581330113 | 4.80E-50 | postive |
| ALB       | LINC02608  | 0.431705397 | 7.04E-26 | postive |
| GPX2      | LINC02608  | 0.423722376 | 6.77E-25 | postive |
| GABARAPL1 | LINC02608  | 0.627506427 | 2.38E-60 | postive |
| CDO1      | LINC02608  | 0.420297638 | 1.75E-24 | postive |
| LPIN1     | LINC02608  | 0.530663103 | 1.75E-40 | postive |
| KLHL24    | AC093726.1 | 0.443283896 | 2.37E-27 | postive |
| LINC00472 | AC093726.1 | 0.405968642 | 8.39E-23 | postive |
| HELLS     | AC025766.1 | 0.510178383 | 4.69E-37 | postive |
| ZNF419    | AC025766.1 | 0.49105754  | 4.64E-34 | postive |
| TUBE1     | AC025766.1 | 0.619129388 | 2.37E-58 | postive |
| ALOX12    | AC025766.1 | 0.646072563 | 5.31E-65 | postive |
| GABPB1    | AC025766.1 | 0.522720699 | 3.98E-39 | postive |
| ATM       | AC025766.1 | 0.682177023 | 4.84E-75 | postive |

|           |            |              |          |          |
|-----------|------------|--------------|----------|----------|
| FBXW7     | AC025766.1 | 0.494905147  | 1.20E-34 | postive  |
| PHKG2     | AC020765.2 | 0.588517332  | 1.53E-51 | postive  |
| TAZ       | AC020765.2 | 0.6541432    | 3.99E-67 | postive  |
| KLHL24    | AC092894.1 | 0.543457864  | 9.58E-43 | postive  |
| LINC00472 | AC092894.1 | 0.578493149  | 1.82E-49 | postive  |
| ZNF419    | AC245060.5 | 0.507775152  | 1.14E-36 | postive  |
| TUBE1     | AC245060.5 | 0.572145897  | 3.46E-48 | postive  |
| ALOX12    | AC245060.5 | 0.535738651  | 2.28E-41 | postive  |
| GABPB1    | AC245060.5 | 0.419377682  | 2.26E-24 | postive  |
| LINC00472 | AC245060.5 | 0.490248103  | 6.16E-34 | postive  |
| ATM       | AC245060.5 | 0.472916875  | 2.19E-31 | postive  |
| FBXW7     | AC245060.5 | 0.405435069  | 9.65E-23 | postive  |
| HELLS     | AC130324.1 | 0.406311163  | 7.66E-23 | postive  |
| ALOX12    | AC130324.1 | 0.412059275  | 1.66E-23 | postive  |
| TFAP2C    | AC130324.1 | 0.521894101  | 5.49E-39 | postive  |
| HBA1      | AC130324.1 | 0.507212332  | 1.41E-36 | postive  |
| DUOX1     | AC130324.1 | 0.429926023  | 1.17E-25 | postive  |
| GPX4      | AC027644.3 | 0.46066134   | 1.14E-29 | postive  |
| HSPB1     | AC027644.3 | 0.555154136  | 6.70E-45 | postive  |
| STAT3     | AC027644.3 | -0.430465889 | 1.00E-25 | negative |
| MAPK14    | AC027644.3 | -0.423842481 | 6.54E-25 | negative |
| HBA1      | AC027644.3 | 0.45197809   | 1.71E-28 | postive  |
| NRAS      | AC027644.3 | -0.401443512 | 2.74E-22 | negative |
| HRAS      | AC027644.3 | 0.670364088  | 1.34E-71 | postive  |
| NCOA4     | AC027644.3 | -0.424259957 | 5.82E-25 | negative |
| PHKG2     | AC027644.3 | 0.466680885  | 1.67E-30 | postive  |
| BECN1     | AC027644.3 | -0.458737336 | 2.09E-29 | negative |
| MAP1LC3A  | AC027644.3 | 0.488135045  | 1.28E-33 | postive  |
| ANO6      | AC027644.3 | -0.443871456 | 1.99E-27 | negative |
| EGLN2     | AC027644.3 | 0.617984211  | 4.39E-58 | postive  |
| TAZ       | AC027644.3 | 0.404003982  | 1.40E-22 | postive  |
| HELLS     | AC007566.1 | 0.438129723  | 1.09E-26 | postive  |
| ZNF419    | AC007566.1 | 0.531543048  | 1.23E-40 | postive  |
| VEGFA     | AC007566.1 | 0.503019315  | 6.53E-36 | postive  |
| TUBE1     | AC007566.1 | 0.712210962  | 1.43E-84 | postive  |
| SETD1B    | AC007566.1 | 0.418130616  | 3.19E-24 | postive  |
| ALOX12    | AC007566.1 | 0.730916663  | 3.75E-91 | postive  |
| GABPB1    | AC007566.1 | 0.481695409  | 1.16E-32 | postive  |
| ATM       | AC007566.1 | 0.675934928  | 3.34E-73 | postive  |
| TAZ       | AC007566.1 | 0.493266152  | 2.14E-34 | postive  |
| FBXW7     | AC007566.1 | 0.514421143  | 9.55E-38 | postive  |
| TFR2      | AC007785.1 | 0.452859249  | 1.30E-28 | postive  |
| IDH1      | AC007785.1 | 0.506632429  | 1.74E-36 | postive  |
| GPX4      | TP53TG1    | 0.580922774  | 5.81E-50 | postive  |
| HSPB1     | TP53TG1    | 0.511521775  | 2.84E-37 | postive  |
| STAT3     | TP53TG1    | -0.481698254 | 1.16E-32 | negative |
| OTUB1     | TP53TG1    | 0.406154247  | 7.99E-23 | postive  |
| OXSR1     | TP53TG1    | -0.478310573 | 3.64E-32 | negative |
| RPL8      | TP53TG1    | 0.564718968  | 9.98E-47 | postive  |
| ATP5MC3   | TP53TG1    | 0.44280474   | 2.74E-27 | postive  |
| IREB2     | TP53TG1    | -0.43696467  | 1.53E-26 | negative |
| SP1       | TP53TG1    | -0.405109476 | 1.05E-22 | negative |
| HRAS      | TP53TG1    | 0.42655677   | 3.05E-25 | postive  |
| BECN1     | TP53TG1    | -0.434334078 | 3.30E-26 | negative |
| GABARAPL2 | TP53TG1    | 0.445924222  | 1.08E-27 | postive  |
| ZEB1      | TP53TG1    | -0.404511027 | 1.23E-22 | negative |
| MAPK8     | TP53TG1    | -0.400826077 | 3.21E-22 | negative |
| SIRT1     | TP53TG1    | -0.408682437 | 4.09E-23 | negative |

|           |            |              |           |          |
|-----------|------------|--------------|-----------|----------|
| TUBE1     | AC026367.3 | 0.47021762   | 5.29E-31  | postive  |
| ATM       | AC093281.2 | 0.42986833   | 1.19E-25  | postive  |
| SLC3A2    | AC124798.1 | 0.407281428  | 5.93E-23  | postive  |
| ATG4D     | AC124798.1 | 0.525924713  | 1.14E-39  | postive  |
| ZNF419    | STK24-AS1  | 0.504756972  | 3.47E-36  | postive  |
| TUBE1     | STK24-AS1  | 0.46440407   | 3.47E-30  | postive  |
| ALOX12    | STK24-AS1  | 0.494941686  | 1.18E-34  | postive  |
| GABPB1    | STK24-AS1  | 0.441918816  | 3.56E-27  | postive  |
| PHKG2     | STK24-AS1  | 0.462986316  | 5.45E-30  | postive  |
| TAZ       | STK24-AS1  | 0.551819755  | 2.81E-44  | postive  |
| HRAS      | AL844908.2 | 0.636579208  | 1.39E-62  | postive  |
| EGLN2     | AL844908.2 | 0.648443669  | 1.28E-65  | postive  |
| VEGFA     | SMAD9-IT1  | 0.524411143  | 2.06E-39  | postive  |
| TUBE1     | SMAD9-IT1  | 0.418493947  | 2.88E-24  | postive  |
| SETD1B    | SMAD9-IT1  | 0.44815253   | 5.49E-28  | postive  |
| ALOX12    | SMAD9-IT1  | 0.534640216  | 3.55E-41  | postive  |
| PHKG2     | AL590705.1 | 0.46961753   | 6.44E-31  | postive  |
| HELLS     | AC024270.3 | 0.445360021  | 1.27E-27  | postive  |
| ZNF419    | AC024270.3 | 0.407671778  | 5.35E-23  | postive  |
| KLHL24    | AC024270.3 | 0.483656719  | 5.98E-33  | postive  |
| TUBE1     | AC024270.3 | 0.456137985  | 4.71E-29  | postive  |
| ALOX12    | AC024270.3 | 0.46488811   | 2.97E-30  | postive  |
| IREB2     | AC024270.3 | 0.46751643   | 1.27E-30  | postive  |
| GABPB1    | AC024270.3 | 0.575950993  | 5.97E-49  | postive  |
| PIK3CA    | AC024270.3 | 0.441722301  | 3.78E-27  | postive  |
| ATG7      | AC024270.3 | 0.420280192  | 1.76E-24  | postive  |
| MAPK8     | AC024270.3 | 0.443189507  | 2.44E-27  | postive  |
| LINC00472 | AC024270.3 | 0.764622236  | 1.58E-104 | postive  |
| ATM       | AC024270.3 | 0.720706527  | 1.71E-87  | postive  |
| FBXW7     | AC024270.3 | 0.471048887  | 4.04E-31  | postive  |
| HELLS     | AC012409.4 | 0.519725313  | 1.27E-38  | postive  |
| TUBE1     | AC012409.4 | 0.428933234  | 1.56E-25  | postive  |
| ALOX12    | AC012409.4 | 0.430646243  | 9.54E-26  | postive  |
| GABPB1    | AC012409.4 | 0.503859522  | 4.81E-36  | postive  |
| ATG7      | AC012409.4 | 0.403682765  | 1.53E-22  | postive  |
| LINC00472 | AC012409.4 | 0.526189815  | 1.03E-39  | postive  |
| ATM       | AC012409.4 | 0.706547124  | 1.11E-82  | postive  |
| FBXW7     | AC012409.4 | 0.451624684  | 1.90E-28  | postive  |
| HELLS     | WDR5B-DT   | 0.431339481  | 7.82E-26  | postive  |
| ZNF419    | WDR5B-DT   | 0.405527914  | 9.42E-23  | postive  |
| TUBE1     | WDR5B-DT   | 0.517351935  | 3.14E-38  | postive  |
| ALOX12    | WDR5B-DT   | 0.490191947  | 6.28E-34  | postive  |
| GABPB1    | WDR5B-DT   | 0.540182053  | 3.71E-42  | postive  |
| MAPK8     | WDR5B-DT   | 0.447594694  | 6.50E-28  | postive  |
| LINC00472 | WDR5B-DT   | 0.625878664  | 5.89E-60  | postive  |
| ATM       | WDR5B-DT   | 0.621098871  | 8.14E-59  | postive  |
| HSPB1     | AC147067.1 | 0.509137397  | 6.90E-37  | postive  |
| GCLC      | AC147067.1 | -0.403759205 | 1.50E-22  | negative |
| SLC2A6    | AC147067.1 | 0.577885886  | 2.42E-49  | postive  |
| IREB2     | AC147067.1 | -0.468901463 | 8.13E-31  | negative |
| SCP2      | AC147067.1 | -0.411306838 | 2.03E-23  | negative |
| LPCAT3    | AC147067.1 | -0.40434874  | 1.28E-22  | negative |
| HRAS      | AC147067.1 | 0.58976015   | 8.37E-52  | postive  |
| NCOA4     | AC147067.1 | -0.465044649 | 2.82E-30  | negative |
| MAPK1     | AC147067.1 | -0.478379131 | 3.56E-32  | negative |
| BID       | AC147067.1 | 0.400951351  | 3.11E-22  | postive  |
| PRKAA2    | AC147067.1 | -0.459246468 | 1.78E-29  | negative |
| EGLN2     | AC147067.1 | 0.511350456  | 3.03E-37  | postive  |

|           |            |              |           |          |
|-----------|------------|--------------|-----------|----------|
| ALOX12    | AC008750.1 | 0.451103884  | 2.23E-28  | postive  |
| IFNG      | AC008750.1 | 0.41836047   | 2.99E-24  | postive  |
| TAZ       | AC008750.1 | 0.415570033  | 6.41E-24  | postive  |
| HELLS     | DUBR       | 0.402639985  | 2.01E-22  | postive  |
| IREB2     | DUBR       | 0.4444449805 | 1.68E-27  | postive  |
| GABPB1    | DUBR       | 0.500787515  | 1.47E-35  | postive  |
| PIK3CA    | DUBR       | 0.49619268   | 7.60E-35  | postive  |
| KRAS      | DUBR       | 0.420046406  | 1.88E-24  | postive  |
| ZEB1      | DUBR       | 0.437730986  | 1.23E-26  | postive  |
| MAPK8     | DUBR       | 0.563200906  | 1.96E-46  | postive  |
| PRKAA1    | DUBR       | 0.416997679  | 4.34E-24  | postive  |
| ATM       | DUBR       | 0.50731812   | 1.35E-36  | postive  |
| SIRT1     | DUBR       | 0.408489491  | 4.30E-23  | postive  |
| ATM       | AC015977.1 | 0.475923722  | 8.08E-32  | postive  |
| HELLS     | AC019186.1 | 0.446762298  | 8.36E-28  | postive  |
| TUBE1     | AC019186.1 | 0.447857159  | 6.00E-28  | postive  |
| ALOX12    | AC019186.1 | 0.421192984  | 1.37E-24  | postive  |
| GABPB1    | AC019186.1 | 0.427646048  | 2.24E-25  | postive  |
| LINC00472 | AC019186.1 | 0.413073545  | 1.26E-23  | postive  |
| ATM       | AC019186.1 | 0.407763338  | 5.22E-23  | postive  |
| TAZ       | AC019186.1 | 0.43286154   | 5.05E-26  | postive  |
| FBXW7     | AC019186.1 | 0.421641474  | 1.21E-24  | postive  |
| HELLS     | FMR1-IT1   | 0.457949262  | 2.68E-29  | postive  |
| ZNF419    | FMR1-IT1   | 0.558197298  | 1.78E-45  | postive  |
| KLHL24    | FMR1-IT1   | 0.40700319   | 6.38E-23  | postive  |
| TUBE1     | FMR1-IT1   | 0.586987966  | 3.21E-51  | postive  |
| SETD1B    | FMR1-IT1   | 0.463027799  | 5.38E-30  | postive  |
| ALOX12    | FMR1-IT1   | 0.599917245  | 5.43E-54  | postive  |
| GABPB1    | FMR1-IT1   | 0.530299857  | 2.03E-40  | postive  |
| MAPK8     | FMR1-IT1   | 0.405621368  | 9.19E-23  | postive  |
| LINC00472 | FMR1-IT1   | 0.656380266  | 1.00E-67  | postive  |
| ATM       | FMR1-IT1   | 0.65104231   | 2.66E-66  | postive  |
| FBXW7     | FMR1-IT1   | 0.501423809  | 1.16E-35  | postive  |
| FANCD2    | AC006160.1 | 0.419796307  | 2.01E-24  | postive  |
| HELLS     | AC006160.1 | 0.420849768  | 1.51E-24  | postive  |
| ALOX12    | AC006160.1 | 0.42677681   | 2.87E-25  | postive  |
| TFAP2C    | AC006160.1 | 0.534548753  | 3.69E-41  | postive  |
| HBA1      | AC006160.1 | 0.474980827  | 1.11E-31  | postive  |
| DUOX1     | AC006160.1 | 0.432596262  | 5.45E-26  | postive  |
| HELLS     | Z98200.1   | 0.458541825  | 2.22E-29  | postive  |
| TUBE1     | Z98200.1   | 0.511277683  | 3.11E-37  | postive  |
| ALOX12    | Z98200.1   | 0.499136885  | 2.66E-35  | postive  |
| GABPB1    | Z98200.1   | 0.445594684  | 1.19E-27  | postive  |
| LINC00472 | Z98200.1   | 0.540760069  | 2.93E-42  | postive  |
| ATM       | Z98200.1   | 0.523217937  | 3.28E-39  | postive  |
| FBXW7     | Z98200.1   | 0.441147617  | 4.48E-27  | postive  |
| HSPB1     | FOXC2-AS1  | 0.458306338  | 2.39E-29  | postive  |
| HBA1      | FOXC2-AS1  | 0.563185958  | 1.98E-46  | postive  |
| HRAS      | FOXC2-AS1  | 0.649890492  | 5.35E-66  | postive  |
| EGLN2     | FOXC2-AS1  | 0.786861043  | 1.18E-114 | postive  |
| RPL8      | LINC02482  | 0.40658857   | 7.12E-23  | postive  |
| MAPK14    | LINC02482  | -0.40841152  | 4.39E-23  | negative |
| BECN1     | LINC02482  | -0.401674616 | 2.58E-22  | negative |
| ZNF419    | AL365330.1 | 0.539792468  | 4.36E-42  | postive  |
| VEGFA     | AL365330.1 | 0.573238823  | 2.09E-48  | postive  |
| TUBE1     | AL365330.1 | 0.560260818  | 7.21E-46  | postive  |
| SETD1B    | AL365330.1 | 0.552615114  | 2.00E-44  | postive  |
| DRD4      | AL365330.1 | 0.41792436   | 3.37E-24  | postive  |

|           |            |             |           |          |
|-----------|------------|-------------|-----------|----------|
| ALOX12    | AL365330.1 | 0.656904943 | 7.22E-68  | postive  |
| PHKG2     | AL365330.1 | 0.428293024 | 1.87E-25  | postive  |
| TAZ       | AL365330.1 | 0.659459455 | 1.46E-68  | postive  |
| FANCD2    | AC008083.3 | 0.528376731 | 4.34E-40  | postive  |
| HELLS     | AC008083.3 | 0.405494697 | 9.50E-23  | postive  |
| TFAP2C    | AC008083.3 | 0.428985536 | 1.53E-25  | postive  |
| HBA1      | AC008083.3 | 0.407694213 | 5.32E-23  | postive  |
| IFNG      | AC008083.3 | 0.416380534 | 5.14E-24  | postive  |
| FBXW7     | AC008083.3 | 0.410816529 | 2.31E-23  | postive  |
| HELLS     | AL139807.1 | 0.552784219 | 1.86E-44  | postive  |
| TUBE1     | AL139807.1 | 0.408094633 | 4.78E-23  | postive  |
| ALOX12    | AL139807.1 | 0.442471327 | 3.02E-27  | postive  |
| GABPB1    | AL139807.1 | 0.527962998 | 5.12E-40  | postive  |
| ATG7      | AL139807.1 | 0.442352475 | 3.13E-27  | postive  |
| LINC00472 | AL139807.1 | 0.610663509 | 2.15E-56  | postive  |
| ATM       | AL139807.1 | 0.715059361 | 1.54E-85  | postive  |
| FBXW7     | AL139807.1 | 0.459151808 | 1.83E-29  | postive  |
| GCLC      | LINC01507  | 0.450559556 | 2.64E-28  | postive  |
| IREB2     | LINC01507  | 0.492136211 | 3.18E-34  | postive  |
| NCOA4     | LINC01507  | 0.494839938 | 1.23E-34  | postive  |
| SNX4      | LINC01507  | 0.484028363 | 5.27E-33  | postive  |
| MAPK1     | LINC01507  | 0.557472845 | 2.45E-45  | postive  |
| MAPK8     | LINC01507  | 0.551720711 | 2.93E-44  | postive  |
| PRKAA2    | LINC01507  | 0.587445096 | 2.57E-51  | postive  |
| ATM       | LINC01507  | 0.532136112 | 9.73E-41  | postive  |
| SIRT1     | LINC01507  | 0.478722275 | 3.17E-32  | postive  |
| GCH1      | AC090152.1 | 0.401266507 | 2.87E-22  | postive  |
| IFNG      | AC090152.1 | 0.49724438  | 5.23E-35  | postive  |
| FBXW7     | AL355075.4 | 0.495129162 | 1.11E-34  | postive  |
| ZNF419    | FLNB-AS1   | 0.481985501 | 1.06E-32  | postive  |
| KLHL24    | FLNB-AS1   | 0.414346167 | 8.94E-24  | postive  |
| ALOX12    | FLNB-AS1   | 0.433087294 | 4.73E-26  | postive  |
| GABPB1    | FLNB-AS1   | 0.46132478  | 9.24E-30  | postive  |
| LINC00472 | FLNB-AS1   | 0.636808416 | 1.22E-62  | postive  |
| ATM       | FLNB-AS1   | 0.474133064 | 1.46E-31  | postive  |
| HSPB1     | UBL7-AS1   | -0.43179008 | 6.87E-26  | negative |
| KLHL24    | UBL7-AS1   | 0.430805125 | 9.12E-26  | postive  |
| EIF2AK4   | UBL7-AS1   | 0.46813148  | 1.04E-30  | postive  |
| IREB2     | UBL7-AS1   | 0.551350548 | 3.44E-44  | postive  |
| PIK3CA    | UBL7-AS1   | 0.461396172 | 9.03E-30  | postive  |
| ATG5      | UBL7-AS1   | 0.427999551 | 2.03E-25  | postive  |
| ATG7      | UBL7-AS1   | 0.409996164 | 2.88E-23  | postive  |
| MAPK8     | UBL7-AS1   | 0.426382477 | 3.21E-25  | postive  |
| PRKAA1    | UBL7-AS1   | 0.455514707 | 5.72E-29  | postive  |
| TLR4      | UBL7-AS1   | 0.404805331 | 1.14E-22  | postive  |
| ATM       | UBL7-AS1   | 0.471268698 | 3.75E-31  | postive  |
| KLHL24    | AC024940.5 | 0.616639884 | 9.05E-58  | postive  |
| PIK3CA    | AC024940.5 | 0.403962814 | 1.42E-22  | postive  |
| KRAS      | AC024940.5 | 0.417569347 | 3.72E-24  | postive  |
| LINC00472 | AC024940.5 | 0.838958341 | 5.17E-144 | postive  |
| LPIN1     | AC024940.5 | 0.42705666  | 2.65E-25  | postive  |
| FANCD2    | AC137932.3 | 0.450511803 | 2.67E-28  | postive  |
| HELLS     | AC137932.3 | 0.506751483 | 1.67E-36  | postive  |
| ZNF419    | AC137932.3 | 0.476317041 | 7.09E-32  | postive  |
| TUBE1     | AC137932.3 | 0.4452865   | 1.30E-27  | postive  |
| ALOX12    | AC137932.3 | 0.597372806 | 1.95E-53  | postive  |
| FBXW7     | AC137932.3 | 0.424563914 | 5.35E-25  | postive  |
| ALOX12    | PRANCR     | 0.410109318 | 2.80E-23  | postive  |

|           |            |              |           |          |
|-----------|------------|--------------|-----------|----------|
| PHKG2     | PRANCR     | 0.585281916  | 7.30E-51  | postive  |
| TAZ       | PRANCR     | 0.653995355  | 4.37E-67  | postive  |
| HBA1      | AC012360.2 | 0.546255017  | 2.97E-43  | postive  |
| NCOA4     | AC108673.2 | -0.405629424 | 9.17E-23  | negative |
| CHMP6     | AP001160.3 | 0.455822659  | 5.20E-29  | postive  |
| PEBP1     | AP001160.3 | 0.443865177  | 2.00E-27  | postive  |
| PLIN2     | AC002401.3 | 0.411530092  | 1.91E-23  | postive  |
| HNF4A     | AC002401.3 | 0.403089332  | 1.78E-22  | postive  |
| PEBP1     | AC002401.3 | 0.43881789   | 8.91E-27  | postive  |
| ALB       | F11-AS1    | 0.429212274  | 1.44E-25  | postive  |
| CDO1      | F11-AS1    | 0.418710538  | 2.72E-24  | postive  |
| HELLS     | AL158163.2 | 0.499876525  | 2.04E-35  | postive  |
| ZNF419    | AL158163.2 | 0.438984252  | 8.49E-27  | postive  |
| KLHL24    | AL158163.2 | 0.449875851  | 3.25E-28  | postive  |
| TUBE1     | AL158163.2 | 0.545697383  | 3.76E-43  | postive  |
| ALOX12    | AL158163.2 | 0.465692981  | 2.29E-30  | postive  |
| IREB2     | AL158163.2 | 0.416419187  | 5.09E-24  | postive  |
| GABPB1    | AL158163.2 | 0.625341235  | 7.93E-60  | postive  |
| PIK3CA    | AL158163.2 | 0.405136579  | 1.04E-22  | postive  |
| MAPK8     | AL158163.2 | 0.48046296   | 1.77E-32  | postive  |
| LINC00472 | AL158163.2 | 0.798218658  | 2.63E-120 | postive  |
| ATM       | AL158163.2 | 0.698028632  | 6.35E-80  | postive  |
| FBXW7     | AL158163.2 | 0.493639702  | 1.88E-34  | postive  |
| HELLS     | AC096586.2 | 0.42844136   | 1.79E-25  | postive  |
| ZNF419    | AC096586.2 | 0.443451717  | 2.26E-27  | postive  |
| KLHL24    | AC096586.2 | 0.559788716  | 8.87E-46  | postive  |
| TUBE1     | AC096586.2 | 0.463222752  | 5.05E-30  | postive  |
| IREB2     | AC096586.2 | 0.456487123  | 4.23E-29  | postive  |
| GABPB1    | AC096586.2 | 0.574924816  | 9.61E-49  | postive  |
| PIK3CA    | AC096586.2 | 0.463515318  | 4.60E-30  | postive  |
| KRAS      | AC096586.2 | 0.431774275  | 6.91E-26  | postive  |
| MAPK8     | AC096586.2 | 0.458873427  | 2.00E-29  | postive  |
| LINC00472 | AC096586.2 | 0.898810374  | 1.71E-194 | postive  |
| PRKAA1    | AC096586.2 | 0.411337739  | 2.01E-23  | postive  |
| ATM       | AC096586.2 | 0.585848707  | 5.56E-51  | postive  |
| FBXW7     | AC096586.2 | 0.443738516  | 2.07E-27  | postive  |
| HELLS     | AL353804.2 | 0.511256139  | 3.14E-37  | postive  |
| KLHL24    | AL353804.2 | 0.419957987  | 1.93E-24  | postive  |
| TUBE1     | AL353804.2 | 0.462977419  | 5.46E-30  | postive  |
| ALOX12    | AL353804.2 | 0.417785337  | 3.50E-24  | postive  |
| GABPB1    | AL353804.2 | 0.576125223  | 5.51E-49  | postive  |
| PIK3CA    | AL353804.2 | 0.400262907  | 3.72E-22  | postive  |
| ATG7      | AL353804.2 | 0.410767799  | 2.34E-23  | postive  |
| MAPK8     | AL353804.2 | 0.412954339  | 1.30E-23  | postive  |
| LINC00472 | AL353804.2 | 0.807642647  | 2.80E-125 | postive  |
| ATM       | AL353804.2 | 0.698570013  | 4.27E-80  | postive  |
| FBXW7     | AL353804.2 | 0.451655757  | 1.88E-28  | postive  |
| ZNF419    | ZNF674-AS1 | 0.47317849   | 2.01E-31  | postive  |
| EIF2S1    | ZNF674-AS1 | 0.424844201  | 4.94E-25  | postive  |
| GABPB1    | ZNF674-AS1 | 0.438303791  | 1.04E-26  | postive  |
| HELLS     | AC053527.2 | 0.530852176  | 1.63E-40  | postive  |
| ZNF419    | AC053527.2 | 0.430333782  | 1.04E-25  | postive  |
| TUBE1     | AC053527.2 | 0.565067855  | 8.54E-47  | postive  |
| ALOX12    | AC053527.2 | 0.579174571  | 1.33E-49  | postive  |
| GABPB1    | AC053527.2 | 0.582320199  | 3.00E-50  | postive  |
| MAPK8     | AC053527.2 | 0.465990723  | 2.08E-30  | postive  |
| LINC00472 | AC053527.2 | 0.610174283  | 2.78E-56  | postive  |
| ATM       | AC053527.2 | 0.768845048  | 2.31E-106 | postive  |

|           |            |             |           |         |
|-----------|------------|-------------|-----------|---------|
| FBXW7     | AC053527.2 | 0.510835299 | 3.67E-37  | postive |
| BRD4      | AC012645.4 | 0.436764739 | 1.63E-26  | postive |
| ZNF419    | AC012645.4 | 0.486273258 | 2.44E-33  | postive |
| TUBE1     | AC012645.4 | 0.445997357 | 1.05E-27  | postive |
| DRD4      | AC012645.4 | 0.448572492 | 4.83E-28  | postive |
| ALOX12    | AC012645.4 | 0.539767275 | 4.40E-42  | postive |
| PHKG2     | AC012645.4 | 0.557722782 | 2.19E-45  | postive |
| TAZ       | AC012645.4 | 0.669166777 | 2.93E-71  | postive |
| MTOR      | AF131215.5 | 0.410404819 | 2.58E-23  | postive |
| KLHL24    | AF131215.5 | 0.456398811 | 4.34E-29  | postive |
| IREB2     | AF131215.5 | 0.432321132 | 5.90E-26  | postive |
| GABPB1    | AF131215.5 | 0.454096459 | 8.88E-29  | postive |
| PIK3CA    | AF131215.5 | 0.41817205  | 3.15E-24  | postive |
| ATG7      | AF131215.5 | 0.401280607 | 2.86E-22  | postive |
| LINC00472 | AF131215.5 | 0.477682276 | 4.50E-32  | postive |
| LPIN1     | AF131215.5 | 0.405997288 | 8.32E-23  | postive |
| ATM       | AF131215.5 | 0.513474458 | 1.37E-37  | postive |
| FBXW7     | AF131215.5 | 0.412517161 | 1.47E-23  | postive |
| ALOX12    | AP001178.1 | 0.42356629  | 7.07E-25  | postive |
| TFAP2C    | AP001178.1 | 0.52020224  | 1.05E-38  | postive |
| HBA1      | AP001178.1 | 0.48542159  | 3.27E-33  | postive |
| DUOX1     | AP001178.1 | 0.402362113 | 2.16E-22  | postive |
| ZNF419    | AC006001.2 | 0.407642743 | 5.39E-23  | postive |
| ALOX12    | AC006001.2 | 0.518513004 | 2.02E-38  | postive |
| TFAP2C    | AC022146.2 | 0.487589147 | 1.55E-33  | postive |
| HBA1      | AC022146.2 | 0.452093465 | 1.65E-28  | postive |
| LINC00472 | AC022146.2 | 0.520783666 | 8.43E-39  | postive |
| HELLS     | NADK2-AS1  | 0.479550593 | 2.40E-32  | postive |
| KLHL24    | NADK2-AS1  | 0.487123226 | 1.82E-33  | postive |
| TUBE1     | NADK2-AS1  | 0.466516567 | 1.76E-30  | postive |
| ALOX12    | NADK2-AS1  | 0.437621055 | 1.27E-26  | postive |
| IREB2     | NADK2-AS1  | 0.472489123 | 2.52E-31  | postive |
| GABPB1    | NADK2-AS1  | 0.553798414 | 1.20E-44  | postive |
| PIK3CA    | NADK2-AS1  | 0.455572251 | 5.62E-29  | postive |
| MAPK8     | NADK2-AS1  | 0.468523605 | 9.19E-31  | postive |
| LINC00472 | NADK2-AS1  | 0.881729718 | 2.38E-177 | postive |
| PRKAA1    | NADK2-AS1  | 0.400108347 | 3.87E-22  | postive |
| ATM       | NADK2-AS1  | 0.691301391 | 8.20E-78  | postive |
| FBXW7     | NADK2-AS1  | 0.443109759 | 2.50E-27  | postive |
| IREB2     | LINC02256  | 0.422381129 | 9.84E-25  | postive |
| ATM       | LINC02256  | 0.42932901  | 1.39E-25  | postive |
| HELLS     | AC098851.1 | 0.521716112 | 5.88E-39  | postive |
| TUBE1     | AC098851.1 | 0.547445724 | 1.80E-43  | postive |
| ALOX12    | AC098851.1 | 0.581664758 | 4.09E-50  | postive |
| GABPB1    | AC098851.1 | 0.514008989 | 1.12E-37  | postive |
| LINC00472 | AC098851.1 | 0.575256351 | 8.24E-49  | postive |
| ATM       | AC098851.1 | 0.735030381 | 1.13E-92  | postive |
| FBXW7     | AC098851.1 | 0.489654058 | 7.58E-34  | postive |
| HELLS     | AL353804.1 | 0.43518926  | 2.57E-26  | postive |
| KLHL24    | AL353804.1 | 0.524403639 | 2.07E-39  | postive |
| TUBE1     | AL353804.1 | 0.426702267 | 2.93E-25  | postive |
| IREB2     | AL353804.1 | 0.500046468 | 1.91E-35  | postive |
| GABPB1    | AL353804.1 | 0.58023427  | 8.05E-50  | postive |
| PIK3CA    | AL353804.1 | 0.511829825 | 2.53E-37  | postive |
| KRAS      | AL353804.1 | 0.430725576 | 9.33E-26  | postive |
| MAPK8     | AL353804.1 | 0.496331314 | 7.23E-35  | postive |
| LINC00472 | AL353804.1 | 0.880539192 | 2.96E-176 | postive |
| PRKAA1    | AL353804.1 | 0.431114206 | 8.35E-26  | postive |



|           |            |              |          |          |
|-----------|------------|--------------|----------|----------|
| ATM       | AL353804.1 | 0.691792888  | 5.77E-78 | postive  |
| FBXW7     | AL353804.1 | 0.455128009  | 6.45E-29 | postive  |
| ISCU      | OLMALINC   | 0.53352416   | 5.57E-41 | postive  |
| DDIT3     | OLMALINC   | 0.513589688  | 1.31E-37 | postive  |
| ATG4D     | OLMALINC   | 0.563866609  | 1.46E-46 | postive  |
| GABARAPL1 | OLMALINC   | 0.576181065  | 5.37E-49 | postive  |
| LPIN1     | OLMALINC   | 0.417155528  | 4.16E-24 | postive  |
| ISCU      | AC129507.4 | 0.421355787  | 1.31E-24 | postive  |
| CHAC1     | AC129507.4 | 0.469383157  | 6.95E-31 | postive  |
| ATG4D     | AC129507.4 | 0.4730226    | 2.11E-31 | postive  |
| MAP1LC3A  | AC129507.4 | 0.515472656  | 6.42E-38 | postive  |
| GPX4      | AC005288.1 | -0.573641245 | 1.74E-48 | negative |
| RB1       | AC005288.1 | 0.578792933  | 1.59E-49 | postive  |
| HSPB1     | AC005288.1 | -0.470528534 | 4.78E-31 | negative |
| GCLC      | AC005288.1 | 0.409292299  | 3.48E-23 | postive  |
| NFE2L2    | AC005288.1 | 0.508279196  | 9.49E-37 | postive  |
| STAT3     | AC005288.1 | 0.593986763  | 1.05E-52 | postive  |
| MTOR      | AC005288.1 | 0.496498779  | 6.82E-35 | postive  |
| ACSL3     | AC005288.1 | 0.425321198  | 4.32E-25 | postive  |
| HIF1A     | AC005288.1 | 0.440231701  | 5.88E-27 | postive  |
| OXSR1     | AC005288.1 | 0.551270631  | 3.56E-44 | postive  |
| ZFP69B    | AC005288.1 | 0.498172672  | 3.75E-35 | postive  |
| EIF2S1    | AC005288.1 | 0.436562579  | 1.73E-26 | postive  |
| RPL8      | AC005288.1 | -0.486395149 | 2.34E-33 | negative |
| MAP3K5    | AC005288.1 | 0.42976546   | 1.23E-25 | postive  |
| MAPK14    | AC005288.1 | 0.64224143   | 5.15E-64 | postive  |
| EIF2AK4   | AC005288.1 | 0.553832288  | 1.19E-44 | postive  |
| IREB2     | AC005288.1 | 0.633880339  | 6.55E-62 | postive  |
| SP1       | AC005288.1 | 0.483009874  | 7.45E-33 | postive  |
| RIPK1     | AC005288.1 | 0.470350582  | 5.07E-31 | postive  |
| PIK3CA    | AC005288.1 | 0.579485667  | 1.14E-49 | postive  |
| NRAS      | AC005288.1 | 0.544560186  | 6.05E-43 | postive  |
| KRAS      | AC005288.1 | 0.503635437  | 5.22E-36 | postive  |
| HRAS      | AC005288.1 | -0.543938951 | 7.84E-43 | negative |
| NCOA4     | AC005288.1 | 0.47282596   | 2.25E-31 | postive  |
| PHKG2     | AC005288.1 | -0.453701273 | 1.00E-28 | negative |
| BECN1     | AC005288.1 | 0.708563629  | 2.38E-83 | postive  |
| MAP1LC3A  | AC005288.1 | -0.434595461 | 3.06E-26 | negative |
| ULK2      | AC005288.1 | 0.474552704  | 1.27E-31 | postive  |
| MAPK1     | AC005288.1 | 0.458970075  | 1.94E-29 | postive  |
| ZEB1      | AC005288.1 | 0.49982104   | 2.08E-35 | postive  |
| MAPK8     | AC005288.1 | 0.512407323  | 2.04E-37 | postive  |
| PRKAA1    | AC005288.1 | 0.513122488  | 1.56E-37 | postive  |
| ANO6      | AC005288.1 | 0.432707721  | 5.28E-26 | postive  |
| TLR4      | AC005288.1 | 0.492864822  | 2.46E-34 | postive  |
| MTDH      | AC005288.1 | 0.529403467  | 2.89E-40 | postive  |
| SIRT1     | AC005288.1 | 0.571416071  | 4.83E-48 | postive  |
| BACH1     | AC005288.1 | 0.465858925  | 2.17E-30 | postive  |
| ZNF419    | AC016737.1 | 0.460380114  | 1.25E-29 | postive  |
| VEGFA     | AC016737.1 | 0.409902012  | 2.95E-23 | postive  |
| TUBE1     | AC016737.1 | 0.497800114  | 4.29E-35 | postive  |
| DRD4      | AC016737.1 | 0.401170248  | 2.94E-22 | postive  |
| ALOX12    | AC016737.1 | 0.527896697  | 5.25E-40 | postive  |
| PHKG2     | AC016737.1 | 0.610011294  | 3.03E-56 | postive  |
| TAZ       | AC016737.1 | 0.693830442  | 1.34E-78 | postive  |
| HELLS     | AL034550.1 | 0.428308848  | 1.86E-25 | postive  |
| BRD4      | AL034550.1 | 0.422520146  | 9.46E-25 | postive  |
| ZNF419    | AL034550.1 | 0.495455206  | 9.88E-35 | postive  |

|           |            |             |           |         |
|-----------|------------|-------------|-----------|---------|
| TUBE1     | AL034550.1 | 0.518650278 | 1.91E-38  | postive |
| SETD1B    | AL034550.1 | 0.505867075 | 2.31E-36  | postive |
| ALOX12    | AL034550.1 | 0.558905869 | 1.31E-45  | postive |
| GABPB1    | AL034550.1 | 0.515560924 | 6.21E-38  | postive |
| ZEB1      | AL034550.1 | 0.458451112 | 2.29E-29  | postive |
| MAPK8     | AL034550.1 | 0.432693001 | 5.30E-26  | postive |
| LINC00472 | AL034550.1 | 0.461805871 | 7.93E-30  | postive |
| ATM       | AL034550.1 | 0.581598594 | 4.22E-50  | postive |
| FBXW7     | AL034550.1 | 0.496701962 | 6.34E-35  | postive |
| TAZ       | AC087741.2 | 0.424792268 | 5.01E-25  | postive |
| HIC1      | AC100803.3 | 0.511462076 | 2.90E-37  | postive |
| ZEB1      | AC100803.3 | 0.481940171 | 1.07E-32  | postive |
| EPAS1     | AC100803.3 | 0.520876162 | 8.13E-39  | postive |
| TUBE1     | AC006272.1 | 0.452403027 | 1.50E-28  | postive |
| ALOX12    | AC006272.1 | 0.512585773 | 1.91E-37  | postive |
| ATM       | AC006272.1 | 0.465371994 | 2.54E-30  | postive |
| TAZ       | AC006272.1 | 0.442070406 | 3.41E-27  | postive |
| FBXW7     | AC006272.1 | 0.440452686 | 5.50E-27  | postive |
| HELLS     | AC025171.2 | 0.40139831  | 2.77E-22  | postive |
| ZNF419    | AC025171.2 | 0.432951873 | 4.92E-26  | postive |
| TUBE1     | AC025171.2 | 0.593858441 | 1.12E-52  | postive |
| SETD1B    | AC025171.2 | 0.461094004 | 9.94E-30  | postive |
| ALOX12    | AC025171.2 | 0.59692925  | 2.43E-53  | postive |
| GABPB1    | AC025171.2 | 0.426998568 | 2.69E-25  | postive |
| ATM       | AC025171.2 | 0.582417244 | 2.86E-50  | postive |
| FBXW7     | AC025171.2 | 0.440988517 | 4.70E-27  | postive |
| BRD4      | RUSC1-AS1  | 0.408896084 | 3.86E-23  | postive |
| ZNF419    | RUSC1-AS1  | 0.618227774 | 3.85E-58  | postive |
| VEGFA     | RUSC1-AS1  | 0.519614488 | 1.32E-38  | postive |
| TUBE1     | RUSC1-AS1  | 0.660696486 | 6.71E-69  | postive |
| SETD1B    | RUSC1-AS1  | 0.527459516 | 6.24E-40  | postive |
| DRD4      | RUSC1-AS1  | 0.435686192 | 2.23E-26  | postive |
| ALOX12    | RUSC1-AS1  | 0.7608391   | 6.44E-103 | postive |
| GABPB1    | RUSC1-AS1  | 0.409332052 | 3.44E-23  | postive |
| PHKG2     | RUSC1-AS1  | 0.482899147 | 7.74E-33  | postive |
| ATM       | RUSC1-AS1  | 0.457426491 | 3.15E-29  | postive |
| YY1AP1    | RUSC1-AS1  | 0.443499247 | 2.23E-27  | postive |
| TAZ       | RUSC1-AS1  | 0.684773635 | 8.07E-76  | postive |
| FBXW7     | RUSC1-AS1  | 0.40233954  | 2.17E-22  | postive |
| HBA1      | HSD11B1-AS | 0.553963195 | 1.12E-44  | postive |
| HRAS      | HSD11B1-AS | 0.573025303 | 2.31E-48  | postive |
| MAP1LC3A  | HSD11B1-AS | 0.407017795 | 6.36E-23  | postive |
| EGLN2     | HSD11B1-AS | 0.737746528 | 1.07E-93  | postive |
| HELLS     | CEP250-AS1 | 0.452981637 | 1.25E-28  | postive |
| ALOX12    | CEP250-AS1 | 0.444801292 | 1.51E-27  | postive |
| ATM       | CEP250-AS1 | 0.503311428 | 5.87E-36  | postive |
| FBXW7     | CEP250-AS1 | 0.521477947 | 6.45E-39  | postive |
| ZNF419    | AL662844.4 | 0.483526201 | 6.25E-33  | postive |
| VEGFA     | AL662844.4 | 0.559137724 | 1.18E-45  | postive |
| TUBE1     | AL662844.4 | 0.571938858 | 3.80E-48  | postive |
| ALOX12    | AL662844.4 | 0.64635715  | 4.48E-65  | postive |
| YY1AP1    | AL662844.4 | 0.449310494 | 3.86E-28  | postive |
| TAZ       | AL662844.4 | 0.48169678  | 1.16E-32  | postive |
| ASNS      | LINC02577  | 0.409356436 | 3.42E-23  | postive |
| FANCD2    | SAP30L-AS1 | 0.436099594 | 1.98E-26  | postive |
| HELLS     | SAP30L-AS1 | 0.473461843 | 1.83E-31  | postive |
| ALOX12    | SAP30L-AS1 | 0.451187743 | 2.17E-28  | postive |
| TFAP2C    | SAP30L-AS1 | 0.503063398 | 6.43E-36  | postive |

|           |            |             |           |         |
|-----------|------------|-------------|-----------|---------|
| HBA1      | SAP30L-AS1 | 0.450273263 | 2.88E-28  | postive |
| DUOX1     | SAP30L-AS1 | 0.451120806 | 2.22E-28  | postive |
| TUBE1     | AC113361.1 | 0.428603321 | 1.71E-25  | postive |
| TFAP2C    | HCG14      | 0.552180907 | 2.41E-44  | postive |
| HBA1      | HCG14      | 0.499719377 | 2.15E-35  | postive |
| TFAP2C    | CATIP-AS2  | 0.423855932 | 6.52E-25  | postive |
| DUOX1     | CATIP-AS2  | 0.610130378 | 2.84E-56  | postive |
| HELLS     | AL157392.2 | 0.453018402 | 1.24E-28  | postive |
| TUBE1     | AL157392.2 | 0.472891818 | 2.20E-31  | postive |
| ALOX12    | AL157392.2 | 0.497449155 | 4.86E-35  | postive |
| GABPB1    | AL157392.2 | 0.471922226 | 3.03E-31  | postive |
| LINC00472 | AL157392.2 | 0.623081453 | 2.75E-59  | postive |
| ATM       | AL157392.2 | 0.65859688  | 2.51E-68  | postive |
| TUBE1     | AC051619.4 | 0.433429635 | 4.29E-26  | postive |
| ALOX12    | AC051619.4 | 0.420771559 | 1.54E-24  | postive |
| ZNF419    | AL445222.1 | 0.422618998 | 9.21E-25  | postive |
| LINC00472 | AL445222.1 | 0.670251352 | 1.44E-71  | postive |
| ATM       | AC104819.3 | 0.492994541 | 2.35E-34  | postive |
| KLHL24    | AC025271.4 | 0.551128195 | 3.78E-44  | postive |
| LINC00472 | AC025271.4 | 0.807288217 | 4.36E-125 | postive |
| LPIN1     | AC025271.4 | 0.478159204 | 3.83E-32  | postive |
| HELLS     | LINC01359  | 0.547916836 | 1.48E-43  | postive |
| ZNF419    | LINC01359  | 0.419280696 | 2.32E-24  | postive |
| TUBE1     | LINC01359  | 0.512267164 | 2.15E-37  | postive |
| ALOX12    | LINC01359  | 0.539008453 | 6.01E-42  | postive |
| GABPB1    | LINC01359  | 0.57249964  | 2.94E-48  | postive |
| MAPK8     | LINC01359  | 0.457613301 | 2.97E-29  | postive |
| LINC00472 | LINC01359  | 0.728436322 | 3.01E-90  | postive |
| ATM       | LINC01359  | 0.718812732 | 7.83E-87  | postive |
| FBXW7     | LINC01359  | 0.507329065 | 1.35E-36  | postive |
| HELLS     | AP000766.1 | 0.405285748 | 1.00E-22  | postive |
| KLHL24    | AP000766.1 | 0.566953759 | 3.66E-47  | postive |
| TUBE1     | AP000766.1 | 0.505087605 | 3.07E-36  | postive |
| MAP3K5    | AP000766.1 | 0.415772632 | 6.07E-24  | postive |
| IREB2     | AP000766.1 | 0.576854365 | 3.92E-49  | postive |
| GABPB1    | AP000766.1 | 0.59499948  | 6.37E-53  | postive |
| EMC2      | AP000766.1 | 0.434984947 | 2.73E-26  | postive |
| PIK3CA    | AP000766.1 | 0.562250035 | 2.99E-46  | postive |
| KRAS      | AP000766.1 | 0.542081041 | 1.70E-42  | postive |
| ZEB1      | AP000766.1 | 0.408613841 | 4.16E-23  | postive |
| MAPK8     | AP000766.1 | 0.603805469 | 7.52E-55  | postive |
| LINC00472 | AP000766.1 | 0.78718976  | 8.20E-115 | postive |
| PRKAA2    | AP000766.1 | 0.521410854 | 6.62E-39  | postive |
| PRKAA1    | AP000766.1 | 0.587460421 | 2.56E-51  | postive |
| ATM       | AP000766.1 | 0.670753407 | 1.04E-71  | postive |
| SIRT1     | AP000766.1 | 0.405462022 | 9.58E-23  | postive |
| FBXW7     | AP000766.1 | 0.417521264 | 3.76E-24  | postive |
| HELLS     | RAB33B-AS1 | 0.521002893 | 7.75E-39  | postive |
| ZNF419    | RAB33B-AS1 | 0.481072568 | 1.44E-32  | postive |
| KLHL24    | RAB33B-AS1 | 0.502793857 | 7.09E-36  | postive |
| TUBE1     | RAB33B-AS1 | 0.576817258 | 3.99E-49  | postive |
| ALOX12    | RAB33B-AS1 | 0.535645125 | 2.37E-41  | postive |
| IREB2     | RAB33B-AS1 | 0.475428808 | 9.53E-32  | postive |
| GABPB1    | RAB33B-AS1 | 0.61911025  | 2.39E-58  | postive |
| PIK3CA    | RAB33B-AS1 | 0.42245116  | 9.65E-25  | postive |
| MAPK8     | RAB33B-AS1 | 0.521166586 | 7.27E-39  | postive |
| LINC00472 | RAB33B-AS1 | 0.755622088 | 9.60E-101 | postive |
| PRKAA2    | RAB33B-AS1 | 0.426075698 | 3.50E-25  | postive |

|           |            |             |          |         |
|-----------|------------|-------------|----------|---------|
| ATM       | RAB33B-AS1 | 0.723190611 | 2.28E-88 | postive |
| FBXW7     | RAB33B-AS1 | 0.497028682 | 5.64E-35 | postive |
| HELLS     | EZR-AS1    | 0.497198038 | 5.31E-35 | postive |
| TUBE1     | EZR-AS1    | 0.404648759 | 1.19E-22 | postive |
| GABPB1    | EZR-AS1    | 0.462599783 | 6.16E-30 | postive |
| LINC00472 | EZR-AS1    | 0.523100612 | 3.44E-39 | postive |
| ATM       | EZR-AS1    | 0.66948119  | 2.38E-71 | postive |
| FBXW7     | EZR-AS1    | 0.413960259 | 9.93E-24 | postive |
| HELLS     | AC110792.3 | 0.522018011 | 5.23E-39 | postive |
| ZNF419    | AC110792.3 | 0.411286006 | 2.04E-23 | postive |
| TUBE1     | AC110792.3 | 0.53082036  | 1.65E-40 | postive |
| GABPB1    | AC110792.3 | 0.627996346 | 1.81E-60 | postive |
| MAPK8     | AC110792.3 | 0.446560842 | 8.88E-28 | postive |
| LINC00472 | AC110792.3 | 0.669520091 | 2.32E-71 | postive |
| ATM       | AC110792.3 | 0.689427226 | 3.10E-77 | postive |
| FBXW7     | AC110792.3 | 0.544805172 | 5.46E-43 | postive |
| TUBE1     | MROCKI     | 0.639965032 | 1.95E-63 | postive |
| ALOX12    | MROCKI     | 0.480998661 | 1.47E-32 | postive |
| TAZ       | MROCKI     | 0.490572209 | 5.50E-34 | postive |
| ZNF419    | AP003419.3 | 0.412321096 | 1.54E-23 | postive |
| ALOX12    | AP003419.3 | 0.4527084   | 1.36E-28 | postive |
| HBA1      | AP003419.3 | 0.482852679 | 7.86E-33 | postive |
| HRAS      | AP003419.3 | 0.411736352 | 1.81E-23 | postive |
| PHKG2     | AP003419.3 | 0.450578208 | 2.62E-28 | postive |
| EGLN2     | AP003419.3 | 0.45459056  | 7.62E-29 | postive |
| TAZ       | AP003419.3 | 0.521300762 | 6.90E-39 | postive |
| HELLS     | AL513477.2 | 0.414955414 | 7.58E-24 | postive |
| ALOX12    | AL513477.2 | 0.464831494 | 3.02E-30 | postive |
| TFAP2C    | AL513477.2 | 0.437228982 | 1.42E-26 | postive |
| ZNF419    | AC005498.3 | 0.474548274 | 1.28E-31 | postive |
| ULK1      | DNAH10OS   | 0.40300462  | 1.82E-22 | postive |
| ACVR1B    | DNAH10OS   | 0.422518376 | 9.47E-25 | postive |
| HBA1      | AP001094.1 | 0.509394664 | 6.27E-37 | postive |
| HRAS      | AP001094.1 | 0.514428665 | 9.53E-38 | postive |
| EGLN2     | AP001094.1 | 0.51808417  | 2.38E-38 | postive |
| HELLS     | AC007663.3 | 0.441109433 | 4.53E-27 | postive |
| ZNF419    | AC007663.3 | 0.474574933 | 1.26E-31 | postive |
| ALOX12    | AC007663.3 | 0.416643348 | 4.79E-24 | postive |
| GABPB1    | AC007663.3 | 0.425051746 | 4.66E-25 | postive |
| ATM       | AC007663.3 | 0.407205537 | 6.05E-23 | postive |
| TAZ       | AC007663.3 | 0.465290029 | 2.61E-30 | postive |
| TFAP2C    | LINC02453  | 0.593484269 | 1.35E-52 | postive |
| HBA1      | LINC02453  | 0.516928845 | 3.69E-38 | postive |
| HELLS     | AL451064.1 | 0.559219692 | 1.14E-45 | postive |
| TUBE1     | AL451064.1 | 0.470930863 | 4.19E-31 | postive |
| ALOX12    | AL451064.1 | 0.474665708 | 1.23E-31 | postive |
| GABPB1    | AL451064.1 | 0.504707154 | 3.53E-36 | postive |
| LINC00472 | AL451064.1 | 0.608529157 | 6.56E-56 | postive |
| ATM       | AL451064.1 | 0.630446297 | 4.59E-61 | postive |
| FBXW7     | AL451064.1 | 0.432369114 | 5.82E-26 | postive |
| TUBE1     | UGDH-AS1   | 0.422731486 | 8.92E-25 | postive |
| ALOX12    | UGDH-AS1   | 0.498255298 | 3.64E-35 | postive |
| IREB2     | UGDH-AS1   | 0.582198544 | 3.18E-50 | postive |
| PIK3CA    | UGDH-AS1   | 0.407582721 | 5.47E-23 | postive |
| ULK2      | UGDH-AS1   | 0.425664753 | 3.92E-25 | postive |
| MAPK8     | UGDH-AS1   | 0.586042251 | 5.06E-51 | postive |
| LINC00472 | UGDH-AS1   | 0.4056179   | 9.20E-23 | postive |
| PRKAA2    | UGDH-AS1   | 0.485298661 | 3.41E-33 | postive |

|           |            |             |           |         |
|-----------|------------|-------------|-----------|---------|
| PRKAA1    | UGDH-AS1   | 0.405344367 | 9.88E-23  | postive |
| ATM       | UGDH-AS1   | 0.624364825 | 1.36E-59  | postive |
| SIRT1     | UGDH-AS1   | 0.47005931  | 5.57E-31  | postive |
| GDF15     | AC015845.2 | 0.450792337 | 2.45E-28  | postive |
| FANCD2    | AC007938.3 | 0.446024172 | 1.04E-27  | postive |
| HELLS     | AC007938.3 | 0.516094097 | 5.07E-38  | postive |
| ZNF419    | AC007938.3 | 0.478655219 | 3.25E-32  | postive |
| ALOX12    | AC007938.3 | 0.407731979 | 5.26E-23  | postive |
| GABPB1    | AC007938.3 | 0.413300845 | 1.19E-23  | postive |
| LINC00472 | AC007938.3 | 0.414492223 | 8.59E-24  | postive |
| FBXW7     | AC007938.3 | 0.411548612 | 1.90E-23  | postive |
| ZNF419    | AC008969.1 | 0.676939535 | 1.70E-73  | postive |
| VEGFA     | AC008969.1 | 0.520232981 | 1.04E-38  | postive |
| TUBE1     | AC008969.1 | 0.608125424 | 8.10E-56  | postive |
| SETD1B    | AC008969.1 | 0.504291894 | 4.11E-36  | postive |
| ALOX12    | AC008969.1 | 0.665787225 | 2.61E-70  | postive |
| GABPB1    | AC008969.1 | 0.519793671 | 1.23E-38  | postive |
| MAPK8     | AC008969.1 | 0.417596689 | 3.69E-24  | postive |
| LINC00472 | AC008969.1 | 0.40278164  | 1.93E-22  | postive |
| ATM       | AC008969.1 | 0.494723466 | 1.28E-34  | postive |
| TAZ       | AC008969.1 | 0.413454132 | 1.14E-23  | postive |
| FBXW7     | AC008969.1 | 0.413370216 | 1.16E-23  | postive |
| FANCD2    | AC024267.3 | 0.415922302 | 5.83E-24  | postive |
| HELLS     | AC024267.3 | 0.414954496 | 7.58E-24  | postive |
| ALOX12    | AC024267.3 | 0.544533268 | 6.12E-43  | postive |
| TFAP2C    | AC024267.3 | 0.447085261 | 7.58E-28  | postive |
| HBA1      | AC024267.3 | 0.412202347 | 1.60E-23  | postive |
| DUOX1     | AC024267.3 | 0.449678291 | 3.45E-28  | postive |
| HELLS     | RHOQ-AS1   | 0.508033358 | 1.04E-36  | postive |
| ZNF419    | RHOQ-AS1   | 0.400136162 | 3.84E-22  | postive |
| KLHL24    | RHOQ-AS1   | 0.403862104 | 1.46E-22  | postive |
| TUBE1     | RHOQ-AS1   | 0.480925498 | 1.51E-32  | postive |
| ALOX12    | RHOQ-AS1   | 0.469295165 | 7.15E-31  | postive |
| GABPB1    | RHOQ-AS1   | 0.572570889 | 2.85E-48  | postive |
| MAPK8     | RHOQ-AS1   | 0.402295902 | 2.19E-22  | postive |
| LINC00472 | RHOQ-AS1   | 0.806606157 | 1.02E-124 | postive |
| ATM       | RHOQ-AS1   | 0.679044038 | 4.11E-74  | postive |
| FBXW7     | RHOQ-AS1   | 0.495351077 | 1.02E-34  | postive |
| HELLS     | ALG13-AS1  | 0.562912713 | 2.23E-46  | postive |
| ZNF419    | ALG13-AS1  | 0.431482548 | 7.51E-26  | postive |
| TUBE1     | ALG13-AS1  | 0.523453619 | 3.00E-39  | postive |
| ALOX12    | ALG13-AS1  | 0.545901862 | 3.45E-43  | postive |
| GABPB1    | ALG13-AS1  | 0.586520122 | 4.02E-51  | postive |
| MAPK8     | ALG13-AS1  | 0.435978835 | 2.05E-26  | postive |
| LINC00472 | ALG13-AS1  | 0.702062713 | 3.23E-81  | postive |
| ATM       | ALG13-AS1  | 0.744438571 | 2.89E-96  | postive |
| FBXW7     | ALG13-AS1  | 0.513277009 | 1.47E-37  | postive |
| KLHL24    | AL031716.1 | 0.505725106 | 2.43E-36  | postive |
| TUBE1     | AL031716.1 | 0.420891761 | 1.49E-24  | postive |
| GABPB1    | AL031716.1 | 0.525415439 | 1.39E-39  | postive |
| PIK3CA    | AL031716.1 | 0.407734059 | 5.26E-23  | postive |
| LINC00472 | AL031716.1 | 0.906165307 | 7.62E-203 | postive |
| ATM       | AL031716.1 | 0.56365693  | 1.60E-46  | postive |
| HELLS     | AC009318.4 | 0.401719032 | 2.55E-22  | postive |
| TUBE1     | AC009318.4 | 0.408989169 | 3.77E-23  | postive |
| ALOX12    | AC009318.4 | 0.447365385 | 6.96E-28  | postive |
| PHKG2     | AC009318.4 | 0.410588672 | 2.46E-23  | postive |
| TAZ       | AC009318.4 | 0.436907331 | 1.56E-26  | postive |

|           |            |             |          |         |
|-----------|------------|-------------|----------|---------|
| KLHL24    | TEX41      | 0.472790072 | 2.28E-31 | postive |
| LINC00472 | TEX41      | 0.71019105  | 6.82E-84 | postive |
| ATM       | TEX41      | 0.438645187 | 9.38E-27 | postive |
| FANCD2    | AC000068.1 | 0.431956845 | 6.55E-26 | postive |
| TFAP2C    | AC000068.1 | 0.59429295  | 9.03E-53 | postive |
| HBA1      | AC000068.1 | 0.496612359 | 6.55E-35 | postive |
| DUOX1     | AC000068.1 | 0.406594389 | 7.11E-23 | postive |
| ISCU      | SCAMP1-AS: | 0.668344501 | 5.00E-71 | postive |
| TMBIM4    | SCAMP1-AS: | 0.467761251 | 1.18E-30 | postive |
| CHMP5     | SCAMP1-AS: | 0.52411075  | 2.32E-39 | postive |
| DDIT3     | SCAMP1-AS: | 0.430857078 | 8.98E-26 | postive |
| HERPUD1   | SCAMP1-AS: | 0.40255207  | 2.05E-22 | postive |
| GOT1      | SCAMP1-AS: | 0.522024666 | 5.22E-39 | postive |
| ATG4D     | SCAMP1-AS: | 0.514234716 | 1.03E-37 | postive |
| GABARAPL2 | SCAMP1-AS: | 0.584551469 | 1.04E-50 | postive |
| GABARAPL1 | SCAMP1-AS: | 0.471192352 | 3.85E-31 | postive |
| ZNF419    | LINC00685  | 0.438977847 | 8.50E-27 | postive |
| DRD4      | LINC00685  | 0.411360326 | 2.00E-23 | postive |
| ALOX12    | LINC00685  | 0.40910993  | 3.65E-23 | postive |
| HBA1      | LINC00685  | 0.428188688 | 1.92E-25 | postive |
| PHKG2     | LINC00685  | 0.462781677 | 5.82E-30 | postive |
| EGLN2     | LINC00685  | 0.490698521 | 5.26E-34 | postive |
| TAZ       | LINC00685  | 0.520044413 | 1.12E-38 | postive |
| HBA1      | AC021188.1 | 0.427258484 | 2.50E-25 | postive |
| PHKG2     | AC000068.2 | 0.456490135 | 4.22E-29 | postive |
| EGLN2     | AC000068.2 | 0.55468072  | 8.22E-45 | postive |
| TAZ       | AC000068.2 | 0.410354575 | 2.62E-23 | postive |
| MTOR      | MIR600HG   | 0.423430192 | 7.34E-25 | postive |
| ZNF419    | MIR600HG   | 0.478887525 | 3.00E-32 | postive |
| KLHL24    | MIR600HG   | 0.486468284 | 2.28E-33 | postive |
| GABARAPL1 | MIR600HG   | 0.480473699 | 1.76E-32 | postive |
| LINC00472 | MIR600HG   | 0.569839779 | 9.91E-48 | postive |
| BAP1      | MIR600HG   | 0.414389976 | 8.84E-24 | postive |
| LPIN1     | MIR600HG   | 0.584369427 | 1.13E-50 | postive |
| ZNF419    | AL158063.1 | 0.467604207 | 1.24E-30 | postive |
| TUBE1     | AL158063.1 | 0.473541792 | 1.78E-31 | postive |
| ALOX12    | AL158063.1 | 0.520810253 | 8.34E-39 | postive |
| PHKG2     | AL158063.1 | 0.469857177 | 5.95E-31 | postive |
| TAZ       | AL158063.1 | 0.579568659 | 1.10E-49 | postive |
| PHKG2     | AC026367.1 | 0.44284451  | 2.71E-27 | postive |
| GPX4      | ENTPD3-AS1 | 0.421301682 | 1.33E-24 | postive |
| HBA1      | ENTPD3-AS1 | 0.620140732 | 1.37E-58 | postive |
| HRAS      | ENTPD3-AS1 | 0.509838534 | 5.32E-37 | postive |
| MAP1LC3A  | ENTPD3-AS1 | 0.493154721 | 2.23E-34 | postive |
| EGLN2     | ENTPD3-AS1 | 0.641097176 | 1.01E-63 | postive |
| TUBE1     | HCG17      | 0.436052745 | 2.00E-26 | postive |
| ATM       | HCG17      | 0.407184251 | 6.08E-23 | postive |
| ZNF419    | AC011330.2 | 0.40117773  | 2.93E-22 | postive |
| LINC00472 | AC011330.2 | 0.563106159 | 2.05E-46 | postive |
| LPIN1     | AC011330.2 | 0.471661337 | 3.30E-31 | postive |
| HELLS     | AC009269.5 | 0.519407322 | 1.43E-38 | postive |
| TUBE1     | AC009269.5 | 0.450198259 | 2.94E-28 | postive |
| ALOX12    | AC009269.5 | 0.426668623 | 2.96E-25 | postive |
| GABPB1    | AC009269.5 | 0.576600922 | 4.41E-49 | postive |
| ATG7      | AC009269.5 | 0.400133493 | 3.84E-22 | postive |
| LINC00472 | AC009269.5 | 0.736181848 | 4.18E-93 | postive |
| ATM       | AC009269.5 | 0.686981141 | 1.73E-76 | postive |
| FBXW7     | AC009269.5 | 0.498349959 | 3.52E-35 | postive |

|           |            |              |           |          |
|-----------|------------|--------------|-----------|----------|
| HELLS     | AC004918.3 | 0.460411838  | 1.23E-29  | postive  |
| MTOR      | AC004918.3 | 0.41101581   | 2.19E-23  | postive  |
| ZNF419    | AC004918.3 | 0.454182583  | 8.65E-29  | postive  |
| ZFP69B    | AC004918.3 | 0.453602733  | 1.03E-28  | postive  |
| TUBE1     | AC004918.3 | 0.517412874  | 3.07E-38  | postive  |
| MAP3K5    | AC004918.3 | 0.400986958  | 3.08E-22  | postive  |
| ALOX12    | AC004918.3 | 0.555675296  | 5.35E-45  | postive  |
| IREB2     | AC004918.3 | 0.498904208  | 2.89E-35  | postive  |
| SP1       | AC004918.3 | 0.403531558  | 1.59E-22  | postive  |
| GABPB1    | AC004918.3 | 0.555361819  | 6.12E-45  | postive  |
| PIK3CA    | AC004918.3 | 0.4222917    | 1.01E-24  | postive  |
| ZEB1      | AC004918.3 | 0.492309395  | 3.00E-34  | postive  |
| MAPK8     | AC004918.3 | 0.552060076  | 2.54E-44  | postive  |
| LINC00472 | AC004918.3 | 0.531956631  | 1.05E-40  | postive  |
| TLR4      | AC004918.3 | 0.406536974  | 7.22E-23  | postive  |
| ATM       | AC004918.3 | 0.790971651  | 1.17E-116 | postive  |
| FBXW7     | AC004918.3 | 0.550033865  | 6.02E-44  | postive  |
| HELLS     | AC009716.1 | 0.505184279  | 2.96E-36  | postive  |
| KLHL24    | AC009716.1 | 0.457074897  | 3.52E-29  | postive  |
| TUBE1     | AC009716.1 | 0.433784835  | 3.87E-26  | postive  |
| ALOX12    | AC009716.1 | 0.450954778  | 2.34E-28  | postive  |
| IREB2     | AC009716.1 | 0.444989239  | 1.42E-27  | postive  |
| GABPB1    | AC009716.1 | 0.556666099  | 3.48E-45  | postive  |
| PIK3CA    | AC009716.1 | 0.434596215  | 3.06E-26  | postive  |
| ATG7      | AC009716.1 | 0.427293287  | 2.48E-25  | postive  |
| MAPK8     | AC009716.1 | 0.420559144  | 1.63E-24  | postive  |
| LINC00472 | AC009716.1 | 0.781137285  | 6.19E-112 | postive  |
| ATM       | AC009716.1 | 0.694593925  | 7.73E-79  | postive  |
| FBXW7     | AC009716.1 | 0.46053258   | 1.19E-29  | postive  |
| SLC2A6    | AL359091.4 | 0.421846562  | 1.14E-24  | postive  |
| HRAS      | AL359091.4 | 0.418786431  | 2.66E-24  | postive  |
| NCOA4     | AL359091.4 | -0.410510929 | 2.51E-23  | negative |
| SLC2A6    | RFX5-AS1   | 0.471659575  | 3.30E-31  | postive  |
| HELLS     | AC005034.2 | 0.440219326  | 5.90E-27  | postive  |
| ZNF419    | AC005034.2 | 0.411634565  | 1.86E-23  | postive  |
| KLHL24    | AC005034.2 | 0.559530489  | 9.94E-46  | postive  |
| TUBE1     | AC005034.2 | 0.460431682  | 1.23E-29  | postive  |
| IREB2     | AC005034.2 | 0.420496122  | 1.66E-24  | postive  |
| GABPB1    | AC005034.2 | 0.564383325  | 1.16E-46  | postive  |
| PIK3CA    | AC005034.2 | 0.458970858  | 1.94E-29  | postive  |
| MAPK8     | AC005034.2 | 0.426421586  | 3.17E-25  | postive  |
| LINC00472 | AC005034.2 | 0.887933539  | 2.98E-183 | postive  |
| ATM       | AC005034.2 | 0.661155855  | 5.02E-69  | postive  |
| FBXW7     | AC005034.2 | 0.494123839  | 1.58E-34  | postive  |
| CHAC1     | PIK3IP1-DT | 0.534408721  | 3.90E-41  | postive  |
| ZNF419    | PIK3IP1-DT | 0.409497729  | 3.29E-23  | postive  |
| MAP1LC3A  | PIK3IP1-DT | 0.403296106  | 1.69E-22  | postive  |
| LINC00472 | PIK3IP1-DT | 0.451797476  | 1.80E-28  | postive  |
| LPIN1     | PIK3IP1-DT | 0.483233353  | 6.91E-33  | postive  |
| ISCU      | AL133370.1 | 0.501600349  | 1.09E-35  | postive  |
| DDIT3     | AL133370.1 | 0.470170165  | 5.38E-31  | postive  |
| ATG4D     | AL133370.1 | 0.404097908  | 1.37E-22  | postive  |
| GABARAPL1 | AL133370.1 | 0.583298833  | 1.88E-50  | postive  |
| LPIN1     | AL133370.1 | 0.472274038  | 2.70E-31  | postive  |
| TUBE1     | AC007546.1 | 0.462260745  | 6.86E-30  | postive  |
| ALOX12    | AC007546.1 | 0.417857588  | 3.43E-24  | postive  |
| GABPB1    | AC007546.1 | 0.408145068  | 4.72E-23  | postive  |
| LINC00472 | AC007546.1 | 0.615019347  | 2.15E-57  | postive  |

|           |            |              |           |          |
|-----------|------------|--------------|-----------|----------|
| ZNF419    | C9orf106   | 0.476758077  | 6.12E-32  | postive  |
| TUBE1     | C9orf106   | 0.423189826  | 7.85E-25  | postive  |
| ALOX12    | C9orf106   | 0.556579693  | 3.61E-45  | postive  |
| GABPB1    | C9orf106   | 0.424657463  | 5.21E-25  | postive  |
| ATM       | C9orf106   | 0.509696067  | 5.61E-37  | postive  |
| MT3       | AC114803.1 | 0.489360077  | 8.39E-34  | postive  |
| HILPDA    | AC114803.1 | 0.415719826  | 6.16E-24  | postive  |
| PTGS2     | AC010735.2 | 0.498751874  | 3.05E-35  | postive  |
| ATF4      | H1-10-AS1  | 0.434018324  | 3.62E-26  | postive  |
| BRD4      | H1-10-AS1  | 0.485529511  | 3.15E-33  | postive  |
| LAMP2     | H1-10-AS1  | -0.403424191 | 1.63E-22  | negative |
| ZNF419    | H1-10-AS1  | 0.48456496   | 4.38E-33  | postive  |
| VEGFA     | H1-10-AS1  | 0.419837903  | 1.99E-24  | postive  |
| DRD4      | H1-10-AS1  | 0.412424751  | 1.50E-23  | postive  |
| ALOX12    | H1-10-AS1  | 0.485478922  | 3.21E-33  | postive  |
| HIC1      | H1-10-AS1  | 0.433129057  | 4.68E-26  | postive  |
| NCOA4     | H1-10-AS1  | -0.439749017 | 6.78E-27  | negative |
| PHKG2     | H1-10-AS1  | 0.486555102  | 2.21E-33  | postive  |
| TAZ       | H1-10-AS1  | 0.693044475  | 2.36E-78  | postive  |
| LPIN1     | AL391121.1 | 0.438978004  | 8.50E-27  | postive  |
| ZNF419    | AC079174.2 | 0.475832288  | 8.33E-32  | postive  |
| NRAS      | AC079174.2 | -0.437357065 | 1.37E-26  | negative |
| NCOA4     | AC079174.2 | -0.416654246 | 4.77E-24  | negative |
| PHKG2     | AC079174.2 | 0.636951262  | 1.12E-62  | postive  |
| ULK1      | AC079174.2 | 0.410064283  | 2.83E-23  | postive  |
| TAZ       | AC079174.2 | 0.611206159  | 1.62E-56  | postive  |
| ZNF419    | NFYC-AS1   | 0.563743521  | 1.54E-46  | postive  |
| VEGFA     | NFYC-AS1   | 0.402476994  | 2.09E-22  | postive  |
| TUBE1     | NFYC-AS1   | 0.65989716   | 1.11E-68  | postive  |
| SETD1B    | NFYC-AS1   | 0.513900325  | 1.16E-37  | postive  |
| ALOX12    | NFYC-AS1   | 0.73688145   | 2.28E-93  | postive  |
| GABPB1    | NFYC-AS1   | 0.466099885  | 2.01E-30  | postive  |
| LINC00472 | NFYC-AS1   | 0.41965119   | 2.10E-24  | postive  |
| ATM       | NFYC-AS1   | 0.56643428   | 4.62E-47  | postive  |
| TAZ       | NFYC-AS1   | 0.486575541  | 2.20E-33  | postive  |
| FANCD2    | AC004803.1 | 0.612737202  | 7.22E-57  | postive  |
| HELLS     | AC004803.1 | 0.524083732  | 2.34E-39  | postive  |
| ANGPTL7   | AC004803.1 | 0.542909971  | 1.20E-42  | postive  |
| ZNF419    | AC004803.1 | 0.407951261  | 4.97E-23  | postive  |
| EIF2S1    | AC004803.1 | 0.440646956  | 5.20E-27  | postive  |
| AURKA     | AC004803.1 | 0.441811729  | 3.68E-27  | postive  |
| TUBE1     | AL359915.1 | 0.440800031  | 4.97E-27  | postive  |
| ALOX12    | AL359915.1 | 0.403228413  | 1.72E-22  | postive  |
| MAPK8     | AL359915.1 | 0.421159535  | 1.38E-24  | postive  |
| PRKAA2    | AL359915.1 | 0.441453003  | 4.09E-27  | postive  |
| ATM       | AL359915.1 | 0.569388558  | 1.22E-47  | postive  |
| ALOX12    | TRAPPC12-A | 0.467730945  | 1.19E-30  | postive  |
| HELLS     | AC011825.2 | 0.543082375  | 1.12E-42  | postive  |
| KLHL24    | AC011825.2 | 0.40758207   | 5.48E-23  | postive  |
| TUBE1     | AC011825.2 | 0.49214945   | 3.17E-34  | postive  |
| ALOX12    | AC011825.2 | 0.475177017  | 1.04E-31  | postive  |
| IREB2     | AC011825.2 | 0.425472204  | 4.14E-25  | postive  |
| GABPB1    | AC011825.2 | 0.595269885  | 5.57E-53  | postive  |
| PIK3CA    | AC011825.2 | 0.401640218  | 2.60E-22  | postive  |
| MAPK8     | AC011825.2 | 0.473747614  | 1.66E-31  | postive  |
| LINC00472 | AC011825.2 | 0.793136816  | 9.84E-118 | postive  |
| ATM       | AC011825.2 | 0.715921937  | 7.79E-86  | postive  |
| FBXW7     | AC011825.2 | 0.51019636   | 4.66E-37  | postive  |



|           |            |              |           |          |
|-----------|------------|--------------|-----------|----------|
| HELLS     | LINC01376  | 0.509710927  | 5.58E-37  | postive  |
| ALOX12    | LINC01376  | 0.515900636  | 5.46E-38  | postive  |
| TFAP2C    | LINC01376  | 0.417657613  | 3.63E-24  | postive  |
| GABPB1    | LINC01376  | 0.413263149  | 1.20E-23  | postive  |
| DUOX1     | LINC01376  | 0.451903409  | 1.75E-28  | postive  |
| ATM       | LINC01376  | 0.487343575  | 1.69E-33  | postive  |
| TFAP2C    | AL596325.2 | 0.431985369  | 6.50E-26  | postive  |
| LINC00472 | AL596325.2 | 0.616814303  | 8.24E-58  | postive  |
| LPIN1     | AL596325.2 | 0.443705206  | 2.09E-27  | postive  |
| HELLS     | AC145285.2 | 0.403857741  | 1.46E-22  | postive  |
| TUBE1     | AC145285.2 | 0.449143821  | 4.06E-28  | postive  |
| ALOX12    | AC145285.2 | 0.534370317  | 3.96E-41  | postive  |
| PHKG2     | AC145285.2 | 0.486782659  | 2.05E-33  | postive  |
| TAZ       | AC145285.2 | 0.535672498  | 2.34E-41  | postive  |
| BAP1      | LINC01123  | 0.412292843  | 1.56E-23  | postive  |
| HELLS     | AC053513.2 | 0.530597647  | 1.80E-40  | postive  |
| ZNF419    | AC053513.2 | 0.479783372  | 2.22E-32  | postive  |
| KLHL24    | AC053513.2 | 0.444677589  | 1.56E-27  | postive  |
| TUBE1     | AC053513.2 | 0.582388647  | 2.90E-50  | postive  |
| ALOX12    | AC053513.2 | 0.573453419  | 1.90E-48  | postive  |
| IREB2     | AC053513.2 | 0.485167347  | 3.57E-33  | postive  |
| GABPB1    | AC053513.2 | 0.607975881  | 8.75E-56  | postive  |
| PIK3CA    | AC053513.2 | 0.442415056  | 3.08E-27  | postive  |
| MAPK8     | AC053513.2 | 0.519410408  | 1.43E-38  | postive  |
| LINC00472 | AC053513.2 | 0.703959299  | 7.82E-82  | postive  |
| ATM       | AC053513.2 | 0.794603528  | 1.81E-118 | postive  |
| FBXW7     | AC053513.2 | 0.553050864  | 1.66E-44  | postive  |
| HSPB1     | AC008610.1 | 0.419545583  | 2.16E-24  | postive  |
| DRD4      | AC008610.1 | 0.414038459  | 9.72E-24  | postive  |
| NRAS      | AC008610.1 | -0.429448383 | 1.34E-25  | negative |
| NCOA4     | AC008610.1 | -0.481653249 | 1.18E-32  | negative |
| PHKG2     | AC008610.1 | 0.656280129  | 1.06E-67  | postive  |
| MAPK1     | AC008610.1 | -0.441669639 | 3.84E-27  | negative |
| TAZ       | AC008610.1 | 0.693907168  | 1.27E-78  | postive  |
| HELLS     | AC078906.1 | 0.470398991  | 4.99E-31  | postive  |
| TUBE1     | AC078906.1 | 0.505167771  | 2.98E-36  | postive  |
| ALOX12    | AC078906.1 | 0.521882897  | 5.51E-39  | postive  |
| ATM       | AC078906.1 | 0.492487333  | 2.81E-34  | postive  |
| TAZ       | AC078906.1 | 0.480242487  | 1.90E-32  | postive  |
| FBXW7     | AC078906.1 | 0.406325589  | 7.63E-23  | postive  |
| VEGFA     | SLC25A21-A | 0.42353119   | 7.14E-25  | postive  |
| HELLS     | AL121890.5 | 0.446251086  | 9.75E-28  | postive  |
| ZNF419    | AL121890.5 | 0.418818205  | 2.64E-24  | postive  |
| TUBE1     | AL121890.5 | 0.423595368  | 7.01E-25  | postive  |
| ALOX12    | AL121890.5 | 0.464546861  | 3.31E-30  | postive  |
| TFAP2C    | AL121890.5 | 0.42366387   | 6.88E-25  | postive  |
| HELLS     | AC084824.3 | 0.42142751   | 1.28E-24  | postive  |
| ZNF419    | AC084824.3 | 0.46507164   | 2.80E-30  | postive  |
| KLHL24    | AC084824.3 | 0.4057711    | 8.83E-23  | postive  |
| TUBE1     | AC084824.3 | 0.545262123  | 4.51E-43  | postive  |
| ALOX12    | AC084824.3 | 0.516295789  | 4.70E-38  | postive  |
| GABPB1    | AC084824.3 | 0.544368806  | 6.55E-43  | postive  |
| MAPK8     | AC084824.3 | 0.404113848  | 1.36E-22  | postive  |
| LINC00472 | AC084824.3 | 0.804791208  | 9.56E-124 | postive  |
| ATM       | AC084824.3 | 0.610176044  | 2.78E-56  | postive  |
| FBXW7     | AC084824.3 | 0.450741468  | 2.49E-28  | postive  |
| HELLS     | AC097641.2 | 0.54352965   | 9.29E-43  | postive  |
| ZNF419    | AC097641.2 | 0.530900991  | 1.59E-40  | postive  |

|           |            |              |          |          |
|-----------|------------|--------------|----------|----------|
| TUBE1     | AC097641.2 | 0.566746241  | 4.02E-47 | postive  |
| ALOX12    | AC097641.2 | 0.583324964  | 1.86E-50 | postive  |
| GABPB1    | AC097641.2 | 0.485283356  | 3.43E-33 | postive  |
| PHKG2     | AC097641.2 | 0.409959374  | 2.91E-23 | postive  |
| LINC00472 | AC097641.2 | 0.413711084  | 1.06E-23 | postive  |
| ATM       | AC097641.2 | 0.577541984  | 2.85E-49 | postive  |
| TAZ       | AC097641.2 | 0.472289468  | 2.69E-31 | postive  |
| FBXW7     | AC097641.2 | 0.535072024  | 2.99E-41 | postive  |
| GCLC      | U91328.1   | 0.473110188  | 2.05E-31 | postive  |
| IREB2     | U91328.1   | 0.433032574  | 4.81E-26 | postive  |
| BID       | U91328.1   | -0.424786138 | 5.02E-25 | negative |
| MAPK8     | U91328.1   | 0.491373781  | 4.16E-34 | postive  |
| JDP2      | AC083967.1 | 0.518155329  | 2.31E-38 | postive  |
| RGS4      | AC083967.1 | 0.471248173  | 3.78E-31 | postive  |
| EIF2S1    | AC083967.1 | 0.462843427  | 5.70E-30 | postive  |
| NOX1      | AL031775.1 | 0.530106454  | 2.19E-40 | postive  |
| TFAP2C    | AC100812.1 | 0.404733765  | 1.16E-22 | postive  |
| BRD4      | SH3BP5-AS1 | 0.432438036  | 5.71E-26 | postive  |
| ZNF419    | SH3BP5-AS1 | 0.584488125  | 1.07E-50 | postive  |
| VEGFA     | SH3BP5-AS1 | 0.499517483  | 2.32E-35 | postive  |
| TUBE1     | SH3BP5-AS1 | 0.638651326  | 4.20E-63 | postive  |
| SETD1B    | SH3BP5-AS1 | 0.494723388  | 1.28E-34 | postive  |
| ALOX12    | SH3BP5-AS1 | 0.66277153   | 1.80E-69 | postive  |
| GABPB1    | SH3BP5-AS1 | 0.499520415  | 2.31E-35 | postive  |
| PHKG2     | SH3BP5-AS1 | 0.410396485  | 2.59E-23 | postive  |
| ATM       | SH3BP5-AS1 | 0.497595845  | 4.61E-35 | postive  |
| TAZ       | SH3BP5-AS1 | 0.609139125  | 4.78E-56 | postive  |
| FBXW7     | SH3BP5-AS1 | 0.53741228   | 1.15E-41 | postive  |
| HELLS     | AC093423.2 | 0.542778444  | 1.27E-42 | postive  |
| TUBE1     | AC093423.2 | 0.433560145  | 4.13E-26 | postive  |
| ALOX12    | AC093423.2 | 0.434713157  | 2.96E-26 | postive  |
| GABPB1    | AC093423.2 | 0.558797956  | 1.37E-45 | postive  |
| ATG7      | AC093423.2 | 0.475486808  | 9.35E-32 | postive  |
| MAPK8     | AC093423.2 | 0.414733543  | 8.05E-24 | postive  |
| LINC00472 | AC093423.2 | 0.611111754  | 1.70E-56 | postive  |
| ATM       | AC093423.2 | 0.731934629  | 1.58E-91 | postive  |
| FBXW7     | AC093423.2 | 0.465335231  | 2.57E-30 | postive  |
| FANCD2    | TMED2-DT   | 0.486067747  | 2.62E-33 | postive  |
| HELLS     | TMED2-DT   | 0.453378808  | 1.11E-28 | postive  |
| ZNF419    | TMED2-DT   | 0.507812907  | 1.13E-36 | postive  |
| TUBE1     | TMED2-DT   | 0.453923612  | 9.37E-29 | postive  |
| DRD4      | TMED2-DT   | 0.414807548  | 7.89E-24 | postive  |
| ALOX12    | TMED2-DT   | 0.675050754  | 6.03E-73 | postive  |
| PHKG2     | TMED2-DT   | 0.435751351  | 2.19E-26 | postive  |
| TAZ       | TMED2-DT   | 0.502960241  | 6.67E-36 | postive  |
| HELLS     | SNHG22     | 0.478605667  | 3.30E-32 | postive  |
| GABPB1    | SNHG22     | 0.430535752  | 9.85E-26 | postive  |
| LINC00472 | SNHG22     | 0.427346592  | 2.44E-25 | postive  |
| ATM       | SNHG22     | 0.662992444  | 1.56E-69 | postive  |
| FBXW7     | SNHG22     | 0.522730203  | 3.97E-39 | postive  |
| TUBE1     | SRP14-AS1  | 0.509624801  | 5.76E-37 | postive  |
| OXSR1     | AL133355.1 | 0.405911694  | 8.51E-23 | postive  |
| SP1       | AL133355.1 | 0.504202526  | 4.24E-36 | postive  |
| ZEB1      | AL133355.1 | 0.423862549  | 6.51E-25 | postive  |
| MAPK8     | AL133355.1 | 0.457679595  | 2.91E-29 | postive  |
| EPAS1     | AL133355.1 | 0.461048666  | 1.01E-29 | postive  |
| SIRT1     | AL133355.1 | 0.44707731   | 7.60E-28 | postive  |
| WIPI2     | LINC00865  | 0.407218776  | 6.03E-23 | postive  |

|                |             |              |                   |
|----------------|-------------|--------------|-------------------|
| LPIN1          | LINC00865   | 0.512176701  | 2.22E-37 postive  |
| NNMT           | LINC01426   | 0.4284154    | 1.80E-25 postive  |
| TAZ            | AC010173.1  | 0.435825273  | 2.14E-26 postive  |
| TFAP2C         | FAM222A-AS1 | 0.528320352  | 4.44E-40 postive  |
| HBA1           | FAM222A-AS1 | 0.472501461  | 2.51E-31 postive  |
| RB1            | TRAM2-AS1   | 0.495969625  | 8.23E-35 postive  |
| GCLC           | TRAM2-AS1   | 0.408025078  | 4.87E-23 postive  |
| CHMP5          | TRAM2-AS1   | 0.486577484  | 2.20E-33 postive  |
| HSD17B11       | TRAM2-AS1   | 0.477240144  | 5.21E-32 postive  |
| MAPK14         | TRAM2-AS1   | 0.437457978  | 1.33E-26 postive  |
| HMGB1          | TRAM2-AS1   | 0.402379891  | 2.15E-22 postive  |
| NRAS           | TRAM2-AS1   | 0.46417894   | 3.72E-30 postive  |
| ATG5           | TRAM2-AS1   | 0.461217161  | 9.56E-30 postive  |
| NCOA4          | TRAM2-AS1   | 0.489399783  | 8.28E-34 postive  |
| PHKG2          | TRAM2-AS1   | -0.419030899 | 2.49E-24 negative |
| SNX4           | TRAM2-AS1   | 0.404878412  | 1.12E-22 postive  |
| MAPK1          | TRAM2-AS1   | 0.457211115  | 3.37E-29 postive  |
| MAPK8          | TRAM2-AS1   | 0.442571872  | 2.94E-27 postive  |
| PRKAA2         | TRAM2-AS1   | 0.465243043  | 2.65E-30 postive  |
| SIRT1          | TRAM2-AS1   | 0.54854898   | 1.13E-43 postive  |
| HBA1           | RTCA-AS1    | 0.50282006   | 7.02E-36 postive  |
| HRAS           | RTCA-AS1    | 0.533772727  | 5.04E-41 postive  |
| EGLN2          | RTCA-AS1    | 0.737362736  | 1.50E-93 postive  |
| ISCU           | NINJ2-AS1   | 0.487471028  | 1.61E-33 postive  |
| GABARAPL1      | NINJ2-AS1   | 0.486163753  | 2.53E-33 postive  |
| WIP1           | NINJ2-AS1   | 0.405329992  | 9.92E-23 postive  |
| LPIN1          | NINJ2-AS1   | 0.441481183  | 4.06E-27 postive  |
| NFS1           | PCAT19      | -0.428763894 | 1.63E-25 negative |
| SLC1A4         | PCAT19      | 0.461897791  | 7.70E-30 postive  |
| BLOC1S5-TXNDC5 | PCAT19      | 0.442944125  | 2.63E-27 postive  |
| IL33           | PCAT19      | 0.44653406   | 8.95E-28 postive  |
| HIC1           | PCAT19      | 0.438523725  | 9.72E-27 postive  |
| MAPK3          | PCAT19      | 0.410565975  | 2.47E-23 postive  |
| ZEB1           | PCAT19      | 0.492536444  | 2.77E-34 postive  |
| EPAS1          | PCAT19      | 0.497445759  | 4.86E-35 postive  |
| EGLN2          | PCAT19      | 0.446595532  | 8.79E-28 postive  |
| ZNF419         | AC093797.1  | 0.448770073  | 4.55E-28 postive  |
| VEGFA          | AC093797.1  | 0.417447763  | 3.84E-24 postive  |
| TUBE1          | AC093797.1  | 0.527918849  | 5.21E-40 postive  |
| ALOX12         | AC093797.1  | 0.60131711   | 2.67E-54 postive  |
| GABPB1         | AC093797.1  | 0.473007828  | 2.12E-31 postive  |
| MAPK8          | AC093797.1  | 0.45166321   | 1.88E-28 postive  |
| LINC00472      | AC093797.1  | 0.53399613   | 4.61E-41 postive  |
| ATM            | AC093797.1  | 0.631338071  | 2.77E-61 postive  |
| FBXW7          | AC093797.1  | 0.426062993  | 3.51E-25 postive  |
| ALOX12         | AC120114.1  | 0.436490774  | 1.76E-26 postive  |
| IREB2          | AC120114.1  | 0.423937558  | 6.37E-25 postive  |
| SP1            | AC120114.1  | 0.526883266  | 7.83E-40 postive  |
| ULK2           | AC120114.1  | 0.439111464  | 8.18E-27 postive  |
| ATM            | AC120114.1  | 0.417363276  | 3.93E-24 postive  |
| SIRT1          | AC120114.1  | 0.401349707  | 2.80E-22 postive  |
| SLC1A4         | AL355803.1  | 0.480878506  | 1.54E-32 postive  |
| VEGFA          | AL355803.1  | 0.492822131  | 2.50E-34 postive  |
| MAPK3          | AL355803.1  | 0.457272017  | 3.31E-29 postive  |
| ZEB1           | AL355803.1  | 0.601169775  | 2.88E-54 postive  |
| EPAS1          | AL355803.1  | 0.614920834  | 2.27E-57 postive  |
| TFAP2C         | AC006111.2  | 0.589431103  | 9.83E-52 postive  |
| HBA1           | AC006111.2  | 0.488838797  | 1.01E-33 postive  |

|           |            |              |          |          |
|-----------|------------|--------------|----------|----------|
| DUOX1     | AC006111.2 | 0.401536017  | 2.67E-22 | postive  |
| FANCD2    | AC004816.1 | 0.436983063  | 1.53E-26 | postive  |
| ASNS      | AC004816.1 | 0.418323395  | 3.02E-24 | postive  |
| JDP2      | AC004816.1 | 0.512968446  | 1.65E-37 | postive  |
| PSAT1     | AC004816.1 | 0.437730028  | 1.23E-26 | postive  |
| RGS4      | AC004816.1 | 0.43305435   | 4.78E-26 | postive  |
| EIF2S1    | AC004816.1 | 0.485895267  | 2.78E-33 | postive  |
| AURKA     | AC004816.1 | 0.428773833  | 1.63E-25 | postive  |
| FANCD2    | KCTD21-AS1 | 0.431256655  | 8.01E-26 | postive  |
| HBA1      | KCTD21-AS1 | 0.427765507  | 2.17E-25 | postive  |
| TFAP2C    | LINC01593  | 0.415867288  | 5.91E-24 | postive  |
| FH        | GAS6-DT    | 0.400247612  | 3.73E-22 | postive  |
| ISCU      | GAS6-DT    | 0.652412968  | 1.15E-66 | postive  |
| ACSL3     | GAS6-DT    | 0.467345374  | 1.35E-30 | postive  |
| KLHL24    | GAS6-DT    | 0.432630541  | 5.40E-26 | postive  |
| SLC2A8    | GAS6-DT    | 0.420980932  | 1.45E-24 | postive  |
| SLC2A12   | GAS6-DT    | 0.43864887   | 9.37E-27 | postive  |
| GOT1      | GAS6-DT    | 0.440910257  | 4.81E-27 | postive  |
| ATG4D     | GAS6-DT    | 0.558698677  | 1.43E-45 | postive  |
| MAP1LC3A  | GAS6-DT    | 0.402778354  | 1.93E-22 | postive  |
| GABARAPL2 | GAS6-DT    | 0.485639492  | 3.03E-33 | postive  |
| GABARAPL1 | GAS6-DT    | 0.676807227  | 1.86E-73 | postive  |
| BAP1      | GAS6-DT    | 0.477762378  | 4.38E-32 | postive  |
| LPIN1     | GAS6-DT    | 0.614462678  | 2.89E-57 | postive  |
| HELLS     | DTX2P1-UPK | 0.543279616  | 1.03E-42 | postive  |
| ZNF419    | DTX2P1-UPK | 0.422155269  | 1.05E-24 | postive  |
| TUBE1     | DTX2P1-UPK | 0.547137336  | 2.05E-43 | postive  |
| ALOX12    | DTX2P1-UPK | 0.556959881  | 3.06E-45 | postive  |
| GABPB1    | DTX2P1-UPK | 0.496417499  | 7.02E-35 | postive  |
| LINC00472 | DTX2P1-UPK | 0.423701817  | 6.81E-25 | postive  |
| ATM       | DTX2P1-UPK | 0.734375004  | 1.98E-92 | postive  |
| FBXW7     | DTX2P1-UPK | 0.60728177   | 1.25E-55 | postive  |
| CA9       | AC106897.1 | 0.420352024  | 1.73E-24 | postive  |
| TUBE1     | LINC01402  | 0.53727692   | 1.22E-41 | postive  |
| SETD1B    | LINC01402  | 0.401561663  | 2.65E-22 | postive  |
| ALOX12    | LINC01402  | 0.548814779  | 1.01E-43 | postive  |
| ATM       | LINC01402  | 0.544373431  | 6.54E-43 | postive  |
| FANCD2    | AC116535.1 | 0.421071305  | 1.42E-24 | postive  |
| ALOX12    | AC116535.1 | 0.454652215  | 7.48E-29 | postive  |
| TFAP2C    | AC116535.1 | 0.457903612  | 2.71E-29 | postive  |
| HBA1      | AC116535.1 | 0.42069855   | 1.57E-24 | postive  |
| DUOX1     | AC116535.1 | 0.408307982  | 4.52E-23 | postive  |
| CHMP6     | BAIAP2-DT  | 0.467944206  | 1.11E-30 | postive  |
| MAPK3     | BAIAP2-DT  | 0.496103651  | 7.84E-35 | postive  |
| HELLS     | PRR34      | 0.401798835  | 2.50E-22 | postive  |
| GABPB1    | PRR34      | 0.469073912  | 7.68E-31 | postive  |
| ATG7      | PRR34      | 0.460088267  | 1.37E-29 | postive  |
| LINC00472 | PRR34      | 0.607114525  | 1.37E-55 | postive  |
| ATM       | PRR34      | 0.56649408   | 4.50E-47 | postive  |
| HELLS     | AC090527.3 | 0.408393442  | 4.42E-23 | postive  |
| ZNF419    | AC090527.3 | 0.500004606  | 1.94E-35 | postive  |
| TUBE1     | AC090527.3 | 0.565104478  | 8.40E-47 | postive  |
| ALOX12    | AC090527.3 | 0.659854827  | 1.14E-68 | postive  |
| GABPB1    | AC090527.3 | 0.424882305  | 4.89E-25 | postive  |
| ATM       | AC090527.3 | 0.454718255  | 7.33E-29 | postive  |
| TAZ       | AC090527.3 | 0.510758857  | 3.78E-37 | postive  |
| HSPA5     | AC018638.7 | -0.400126451 | 3.85E-22 | negative |
| ZNF419    | AC018638.7 | 0.557234347  | 2.71E-45 | postive  |

|           |            |             |           |         |
|-----------|------------|-------------|-----------|---------|
| TUBE1     | AC018638.7 | 0.566471577 | 4.55E-47  | postive |
| ALOX12    | AC018638.7 | 0.467089131 | 1.46E-30  | postive |
| GABPB1    | AC018638.7 | 0.476772021 | 6.09E-32  | postive |
| LINC00472 | AC018638.7 | 0.565227993 | 7.95E-47  | postive |
| ATM       | AC018638.7 | 0.423151233 | 7.94E-25  | postive |
| TAZ       | AC018638.7 | 0.472636876 | 2.40E-31  | postive |
| FBXW7     | AC018638.7 | 0.427518914 | 2.32E-25  | postive |
| NCF2      | PTPRN2-AS1 | 0.663205188 | 1.37E-69  | postive |
| FTL       | PTPRN2-AS1 | 0.43781343  | 1.20E-26  | postive |
| HAMP      | PTPRN2-AS1 | 0.538717923 | 6.77E-42  | postive |
| ALOX5     | PTPRN2-AS1 | 0.509875002 | 5.25E-37  | postive |
| CYBB      | PTPRN2-AS1 | 0.672454133 | 3.38E-72  | postive |
| ATG7      | PTPRN2-AS1 | 0.473747571 | 1.66E-31  | postive |
| IFNG      | PTPRN2-AS1 | 0.45359829  | 1.04E-28  | postive |
| GPX4      | AL355001.2 | 0.450767438 | 2.47E-28  | postive |
| OTUB1     | AL355001.2 | 0.561447093 | 4.27E-46  | postive |
| ATP5MC3   | AL355001.2 | 0.423273393 | 7.67E-25  | postive |
| ATG4D     | AL355001.2 | 0.488423779 | 1.16E-33  | postive |
| GABARAPL2 | AL355001.2 | 0.564763408 | 9.78E-47  | postive |
| TFAP2C    | AP003555.2 | 0.522429837 | 4.46E-39  | postive |
| HBA1      | AP003555.2 | 0.494484308 | 1.39E-34  | postive |
| DUOX1     | AP003555.2 | 0.409575232 | 3.22E-23  | postive |
| ALOX12    | AC084117.1 | 0.411963627 | 1.70E-23  | postive |
| PHKG2     | AC084117.1 | 0.423115698 | 8.02E-25  | postive |
| TAZ       | AC084117.1 | 0.477475629 | 4.82E-32  | postive |
| FBXW7     | AC084117.1 | 0.44819457  | 5.42E-28  | postive |
| HELLS     | AP001033.2 | 0.480499958 | 1.75E-32  | postive |
| KLHL24    | AP001033.2 | 0.537402423 | 1.16E-41  | postive |
| TUBE1     | AP001033.2 | 0.461115703 | 9.87E-30  | postive |
| IREB2     | AP001033.2 | 0.4284432   | 1.79E-25  | postive |
| GABPB1    | AP001033.2 | 0.582365888 | 2.94E-50  | postive |
| PIK3CA    | AP001033.2 | 0.450031213 | 3.10E-28  | postive |
| KRAS      | AP001033.2 | 0.433996181 | 3.64E-26  | postive |
| MAPK8     | AP001033.2 | 0.426850055 | 2.81E-25  | postive |
| LINC00472 | AP001033.2 | 0.855191764 | 2.19E-155 | postive |
| LPIN1     | AP001033.2 | 0.425993021 | 3.58E-25  | postive |
| ATM       | AP001033.2 | 0.646796257 | 3.45E-65  | postive |
| FBXW7     | AP001033.2 | 0.459105533 | 1.86E-29  | postive |
| ANGPTL7   | HOTAIR     | 0.445856692 | 1.10E-27  | postive |
| CS        | REPIN1-AS1 | 0.516696248 | 4.03E-38  | postive |
| GABARAPL1 | REPIN1-AS1 | 0.422866565 | 8.59E-25  | postive |
| WIPI2     | REPIN1-AS1 | 0.437794231 | 1.20E-26  | postive |
| HBA1      | AL513165.1 | 0.551171365 | 3.71E-44  | postive |
| HRAS      | AL513165.1 | 0.579278783 | 1.26E-49  | postive |
| EGLN2     | AL513165.1 | 0.750721372 | 9.43E-99  | postive |
| LAMP2     | AC124067.4 | 0.46193672  | 7.61E-30  | postive |
| HELLS     | IRF1-AS1   | 0.521707371 | 5.90E-39  | postive |
| ZNF419    | IRF1-AS1   | 0.42499045  | 4.74E-25  | postive |
| TUBE1     | IRF1-AS1   | 0.579153543 | 1.34E-49  | postive |
| ALOX12    | IRF1-AS1   | 0.581175681 | 5.16E-50  | postive |
| GABPB1    | IRF1-AS1   | 0.565042266 | 8.63E-47  | postive |
| LINC00472 | IRF1-AS1   | 0.554972127 | 7.25E-45  | postive |
| ATM       | IRF1-AS1   | 0.740766768 | 7.61E-95  | postive |
| FBXW7     | IRF1-AS1   | 0.52669492  | 8.43E-40  | postive |
| PHKG2     | AC106820.3 | 0.400376232 | 3.61E-22  | postive |
| HSPB1     | AC023509.3 | 0.437433754 | 1.34E-26  | postive |
| SLC2A8    | AC023509.3 | 0.437485578 | 1.32E-26  | postive |
| HBA1      | AC023509.3 | 0.434619357 | 3.04E-26  | postive |

|           |            |              |          |          |
|-----------|------------|--------------|----------|----------|
| HRAS      | AC023509.3 | 0.638162233  | 5.58E-63 | postive  |
| PHKG2     | AC023509.3 | 0.442077579  | 3.40E-27 | postive  |
| MAP1LC3A  | AC023509.3 | 0.539972689  | 4.05E-42 | postive  |
| EGLN2     | AC023509.3 | 0.703743534  | 9.19E-82 | postive  |
| FANCD2    | AC010976.1 | 0.416006981  | 5.69E-24 | postive  |
| HELLS     | AC010976.1 | 0.612088262  | 1.02E-56 | postive  |
| ZNF419    | AC010976.1 | 0.454803039  | 7.14E-29 | postive  |
| TUBE1     | AC010976.1 | 0.541573762  | 2.09E-42 | postive  |
| ALOX12    | AC010976.1 | 0.611133436  | 1.68E-56 | postive  |
| GABPB1    | AC010976.1 | 0.551672994  | 2.99E-44 | postive  |
| LINC00472 | AC010976.1 | 0.562614551  | 2.55E-46 | postive  |
| ATM       | AC010976.1 | 0.619867807  | 1.59E-58 | postive  |
| FBXW7     | AC010976.1 | 0.526611765  | 8.71E-40 | postive  |
| ISCU      | AP001033.1 | 0.454932906  | 6.85E-29 | postive  |
| HELLS     | AC005632.3 | 0.507514082  | 1.26E-36 | postive  |
| TUBE1     | AC005632.3 | 0.498136074  | 3.80E-35 | postive  |
| ALOX12    | AC005632.3 | 0.497145732  | 5.41E-35 | postive  |
| GABPB1    | AC005632.3 | 0.490628706  | 5.39E-34 | postive  |
| LINC00472 | AC005632.3 | 0.630762287  | 3.84E-61 | postive  |
| ATM       | AC005632.3 | 0.619381977  | 2.07E-58 | postive  |
| FBXW7     | AC005632.3 | 0.441761911  | 3.73E-27 | postive  |
| HELLS     | AP002449.1 | 0.458891507  | 1.99E-29 | postive  |
| TUBE1     | AP002449.1 | 0.494180263  | 1.55E-34 | postive  |
| GABPB1    | AP002449.1 | 0.515996635  | 5.26E-38 | postive  |
| MAPK8     | AP002449.1 | 0.42546196   | 4.15E-25 | postive  |
| LINC00472 | AP002449.1 | 0.445034866  | 1.41E-27 | postive  |
| ATM       | AP002449.1 | 0.51385617   | 1.18E-37 | postive  |
| BRD4      | THBS3-AS1  | 0.469167347  | 7.45E-31 | postive  |
| ZNF419    | THBS3-AS1  | 0.514785578  | 8.33E-38 | postive  |
| VEGFA     | THBS3-AS1  | 0.465472264  | 2.46E-30 | postive  |
| TUBE1     | THBS3-AS1  | 0.441646859  | 3.86E-27 | postive  |
| SETD1B    | THBS3-AS1  | 0.438392599  | 1.01E-26 | postive  |
| DRD4      | THBS3-AS1  | 0.41005141   | 2.84E-23 | postive  |
| ALOX12    | THBS3-AS1  | 0.591175895  | 4.19E-52 | postive  |
| PHKG2     | THBS3-AS1  | 0.492506691  | 2.80E-34 | postive  |
| ULK1      | THBS3-AS1  | 0.434399611  | 3.24E-26 | postive  |
| YY1AP1    | THBS3-AS1  | 0.417425975  | 3.86E-24 | postive  |
| TAZ       | THBS3-AS1  | 0.618001578  | 4.35E-58 | postive  |
| ZNF419    | AC100803.4 | 0.484810113  | 4.03E-33 | postive  |
| VEGFA     | AC100803.4 | 0.455364299  | 5.99E-29 | postive  |
| ALOX12    | AC100803.4 | 0.440687298  | 5.14E-27 | postive  |
| HIC1      | AC100803.4 | 0.427971681  | 2.04E-25 | postive  |
| TAZ       | AC100803.4 | 0.484583666  | 4.36E-33 | postive  |
| HBA1      | AC087379.2 | 0.51134921   | 3.03E-37 | postive  |
| HRAS      | AC087379.2 | 0.470974567  | 4.13E-31 | postive  |
| EGLN2     | AC087379.2 | 0.632962645  | 1.10E-61 | postive  |
| FANCD2    | AC008676.1 | 0.400160362  | 3.82E-22 | postive  |
| ALOX12    | AC008676.1 | 0.411453288  | 1.95E-23 | postive  |
| TFAP2C    | AC008676.1 | 0.533736785  | 5.12E-41 | postive  |
| HBA1      | AC008676.1 | 0.536272283  | 1.84E-41 | postive  |
| DUOX1     | AC008676.1 | 0.438800544  | 8.96E-27 | postive  |
| CHMP5     | TMEM92-AS  | -0.403498777 | 1.60E-22 | negative |
| STEAP3    | TMEM92-AS  | 0.502585398  | 7.65E-36 | postive  |
| FANCD2    | AC026401.3 | 0.461439492  | 8.91E-30 | postive  |
| HELLS     | AC026401.3 | 0.43360465   | 4.08E-26 | postive  |
| SLC2A6    | AC026401.3 | 0.439298393  | 7.74E-27 | postive  |
| STMN1     | AC026401.3 | 0.524542871  | 1.96E-39 | postive  |
| RRM2      | AC026401.3 | 0.540964937  | 2.69E-42 | postive  |

|           |            |              |          |          |
|-----------|------------|--------------|----------|----------|
| AURKA     | AC026401.3 | 0.520791321  | 8.40E-39 | postive  |
| HRAS      | AC026401.3 | 0.402153164  | 2.28E-22 | postive  |
| SLC1A5    | AC026401.3 | 0.452657134  | 1.38E-28 | postive  |
| NCOA4     | AC026401.3 | -0.514441993 | 9.48E-38 | negative |
| PHKG2     | AC026401.3 | 0.488366201  | 1.18E-33 | postive  |
| BID       | AC026401.3 | 0.452788123  | 1.33E-28 | postive  |
| CDKN2A    | AC026401.3 | 0.472362311  | 2.62E-31 | postive  |
| PRKAA2    | AC026401.3 | -0.419588355 | 2.13E-24 | negative |
| TAZ       | AC026401.3 | 0.49845425   | 3.39E-35 | postive  |
| FANCD2    | TDRKH-AS1  | 0.416963517  | 4.39E-24 | postive  |
| TFAP2C    | TDRKH-AS1  | 0.456397899  | 4.35E-29 | postive  |
| HBA1      | TDRKH-AS1  | 0.454746592  | 7.26E-29 | postive  |
| ALOX12    | LINC02569  | 0.436832983  | 1.60E-26 | postive  |
| HELLS     | AC007347.1 | 0.503949012  | 4.66E-36 | postive  |
| ALOX12    | AC007347.1 | 0.402411632  | 2.13E-22 | postive  |
| GABPB1    | AC007347.1 | 0.495767724  | 8.84E-35 | postive  |
| ATG7      | AC007347.1 | 0.455791762  | 5.25E-29 | postive  |
| LINC00472 | AC007347.1 | 0.577797464  | 2.53E-49 | postive  |
| ATM       | AC007347.1 | 0.69762264   | 8.55E-80 | postive  |
| FBXW7     | AC007347.1 | 0.435652722  | 2.25E-26 | postive  |
| ZNF419    | MRPS9-AS1  | 0.540431522  | 3.35E-42 | postive  |
| VEGFA     | MRPS9-AS1  | 0.40134069   | 2.81E-22 | postive  |
| TUBE1     | MRPS9-AS1  | 0.599679898  | 6.12E-54 | postive  |
| SETD1B    | MRPS9-AS1  | 0.434524726  | 3.12E-26 | postive  |
| ALOX12    | MRPS9-AS1  | 0.56885694   | 1.55E-47 | postive  |
| GABPB1    | MRPS9-AS1  | 0.458161049  | 2.50E-29 | postive  |
| LINC00472 | MRPS9-AS1  | 0.484777263  | 4.08E-33 | postive  |
| ATM       | MRPS9-AS1  | 0.449197776  | 3.99E-28 | postive  |
| TAZ       | MRPS9-AS1  | 0.525964797  | 1.12E-39 | postive  |
| FBXW7     | MRPS9-AS1  | 0.459821136  | 1.49E-29 | postive  |
| GPX4      | LINC01637  | 0.436934572  | 1.55E-26 | postive  |
| GCLC      | LINC01637  | -0.407015227 | 6.36E-23 | negative |
| PIK3CA    | LINC01637  | -0.406052766 | 8.20E-23 | negative |
| PHKG2     | LINC01637  | 0.499942012  | 1.99E-35 | postive  |
| PRKAA1    | LINC01637  | -0.427411907 | 2.40E-25 | negative |
| EPAS1     | LINC01637  | -0.40754001  | 5.54E-23 | negative |
| SIRT1     | LINC01637  | -0.416727688 | 4.68E-24 | negative |
| TUBE1     | AL353622.1 | 0.498260317  | 3.64E-35 | postive  |
| ALOX12    | AL353622.1 | 0.524385295  | 2.08E-39 | postive  |
| PHKG2     | AL353622.1 | 0.487736107  | 1.47E-33 | postive  |
| TAZ       | AL353622.1 | 0.586606157  | 3.86E-51 | postive  |
| ZNF419    | AC068620.1 | 0.452695849  | 1.37E-28 | postive  |
| TUBE1     | AC068620.1 | 0.445728677  | 1.14E-27 | postive  |
| ALOX12    | AC068620.1 | 0.458607961  | 2.18E-29 | postive  |
| GABPB1    | AC068620.1 | 0.453223485  | 1.16E-28 | postive  |
| ATM       | AC068620.1 | 0.552978122  | 1.71E-44 | postive  |
| FBXW7     | AC068620.1 | 0.400846927  | 3.19E-22 | postive  |
| ZNF419    | AC008875.1 | 0.403060623  | 1.80E-22 | postive  |
| PHKG2     | AC008875.1 | 0.657964288  | 3.73E-68 | postive  |
| TAZ       | AC008875.1 | 0.637807918  | 6.85E-63 | postive  |
| HELLS     | AL133342.1 | 0.521667746  | 5.99E-39 | postive  |
| GABPB1    | AL133342.1 | 0.502211692  | 8.76E-36 | postive  |
| ATG7      | AL133342.1 | 0.469275217  | 7.20E-31 | postive  |
| LINC00472 | AL133342.1 | 0.44924344   | 3.94E-28 | postive  |
| ATM       | AL133342.1 | 0.687233699  | 1.45E-76 | postive  |
| FBXW7     | AL133342.1 | 0.473217613  | 1.98E-31 | postive  |
| ZNF419    | AC245884.8 | 0.531068559  | 1.49E-40 | postive  |
| TUBE1     | AC245884.8 | 0.498874     | 2.92E-35 | postive  |

|           |            |              |           |          |
|-----------|------------|--------------|-----------|----------|
| DRD4      | AC245884.8 | 0.43021492   | 1.08E-25  | postive  |
| ALOX12    | AC245884.8 | 0.568645538  | 1.70E-47  | postive  |
| PHKG2     | AC245884.8 | 0.565343553  | 7.55E-47  | postive  |
| TAZ       | AC245884.8 | 0.666746242  | 1.41E-70  | postive  |
| FANCD2    | PDE2A-AS2  | 0.543754537  | 8.46E-43  | postive  |
| JDP2      | PDE2A-AS2  | 0.586284841  | 4.51E-51  | postive  |
| ALOX12    | AC067930.3 | 0.403501576  | 1.60E-22  | postive  |
| TFAP2C    | AC245100.5 | 0.55907038   | 1.22E-45  | postive  |
| HBA1      | AC245100.5 | 0.496317182  | 7.27E-35  | postive  |
| DUOX1     | AC245100.5 | 0.410136351  | 2.78E-23  | postive  |
| HSPA5     | AC015961.2 | -0.40316961  | 1.75E-22  | negative |
| ZNF419    | AC015961.2 | 0.443864035  | 2.00E-27  | postive  |
| NCOA4     | AC015961.2 | -0.418626199 | 2.78E-24  | negative |
| PHKG2     | AC015961.2 | 0.488473607  | 1.14E-33  | postive  |
| TAZ       | AC015961.2 | 0.624229828  | 1.46E-59  | postive  |
| HELLS     | ERVK13-1   | 0.47605192   | 7.75E-32  | postive  |
| ZNF419    | ERVK13-1   | 0.555740639  | 5.20E-45  | postive  |
| VEGFA     | ERVK13-1   | 0.447285838  | 7.13E-28  | postive  |
| TUBE1     | ERVK13-1   | 0.672373457  | 3.57E-72  | postive  |
| SETD1B    | ERVK13-1   | 0.504798951  | 3.41E-36  | postive  |
| ALOX12    | ERVK13-1   | 0.693169581  | 2.15E-78  | postive  |
| GABPB1    | ERVK13-1   | 0.543554433  | 9.20E-43  | postive  |
| MAPK8     | ERVK13-1   | 0.425693702  | 3.89E-25  | postive  |
| LINC00472 | ERVK13-1   | 0.512838241  | 1.73E-37  | postive  |
| ATM       | ERVK13-1   | 0.671991533  | 4.59E-72  | postive  |
| TAZ       | ERVK13-1   | 0.433190083  | 4.59E-26  | postive  |
| FBXW7     | ERVK13-1   | 0.532761082  | 7.57E-41  | postive  |
| HELLS     | ALOX12-AS1 | 0.428201713  | 1.92E-25  | postive  |
| ZNF419    | ALOX12-AS1 | 0.485663082  | 3.01E-33  | postive  |
| VEGFA     | ALOX12-AS1 | 0.426397301  | 3.19E-25  | postive  |
| TUBE1     | ALOX12-AS1 | 0.584988983  | 8.40E-51  | postive  |
| SETD1B    | ALOX12-AS1 | 0.482860896  | 7.84E-33  | postive  |
| ALOX12    | ALOX12-AS1 | 0.891803543  | 4.11E-187 | postive  |
| ULK2      | ALOX12-AS1 | 0.421158752  | 1.38E-24  | postive  |
| ATM       | ALOX12-AS1 | 0.579505637  | 1.13E-49  | postive  |
| YY1AP1    | ALOX12-AS1 | 0.45969259   | 1.55E-29  | postive  |
| ATF4      | SNHG8      | 0.427800081  | 2.15E-25  | postive  |
| RPL8      | SNHG8      | 0.480367715  | 1.82E-32  | postive  |
| NCOA4     | AC145423.1 | -0.408405046 | 4.40E-23  | negative |
| PHKG2     | AC145423.1 | 0.526209414  | 1.02E-39  | postive  |
| TAZ       | AC145423.1 | 0.595344101  | 5.36E-53  | postive  |
| FANCD2    | PRR7-AS1   | 0.404896459  | 1.11E-22  | postive  |
| HELLS     | PRR7-AS1   | 0.528808102  | 3.66E-40  | postive  |
| ALOX12    | PRR7-AS1   | 0.49080235   | 5.08E-34  | postive  |
| TFAP2C    | PRR7-AS1   | 0.403376008  | 1.66E-22  | postive  |
| FANCD2    | SPART-AS1  | 0.44539424   | 1.26E-27  | postive  |
| PEBP1     | AL121992.3 | 0.565560235  | 6.85E-47  | postive  |
| MIOX      | AL121992.3 | 0.440196974  | 5.94E-27  | postive  |
| VEGFA     | LINC00173  | 0.454967259  | 6.78E-29  | postive  |
| TUBE1     | LINC00173  | 0.421843917  | 1.14E-24  | postive  |
| ALOX12    | LINC00173  | 0.591487216  | 3.60E-52  | postive  |
| TAZ       | LINC00173  | 0.480967682  | 1.49E-32  | postive  |
| FANCD2    | AC115618.1 | 0.440268254  | 5.81E-27  | postive  |
| ALOX12    | AC026803.1 | 0.460788634  | 1.09E-29  | postive  |
| TAZ       | AC026803.1 | 0.404982379  | 1.09E-22  | postive  |
| KLHL24    | ATP1B3-AS1 | 0.458918093  | 1.97E-29  | postive  |
| TUBE1     | ATP1B3-AS1 | 0.427384582  | 2.41E-25  | postive  |
| IREB2     | ATP1B3-AS1 | 0.409239412  | 3.53E-23  | postive  |



|           |            |              |           |          |
|-----------|------------|--------------|-----------|----------|
| GABPB1    | ATP1B3-AS1 | 0.519126151  | 1.59E-38  | postive  |
| PIK3CA    | ATP1B3-AS1 | 0.441999716  | 3.48E-27  | postive  |
| MAPK8     | ATP1B3-AS1 | 0.436885603  | 1.57E-26  | postive  |
| LINC00472 | ATP1B3-AS1 | 0.805578342  | 3.63E-124 | postive  |
| ATM       | ATP1B3-AS1 | 0.545506856  | 4.07E-43  | postive  |
| FBXW7     | ATP1B3-AS1 | 0.413002483  | 1.29E-23  | postive  |
| ZNF419    | AP003352.1 | 0.463760902  | 4.26E-30  | postive  |
| TUBE1     | AP003352.1 | 0.438696464  | 9.24E-27  | postive  |
| HRAS      | AP003352.1 | 0.424299057  | 5.76E-25  | postive  |
| NCOA4     | AP003352.1 | -0.459196502 | 1.81E-29  | negative |
| PHKG2     | AP003352.1 | 0.626786054  | 3.56E-60  | postive  |
| EGLN2     | AP003352.1 | 0.457230436  | 3.35E-29  | postive  |
| TAZ       | AP003352.1 | 0.702773197  | 1.90E-81  | postive  |
| HELLS     | AL390195.2 | 0.444551611  | 1.62E-27  | postive  |
| TUBE1     | AL390195.2 | 0.530799638  | 1.66E-40  | postive  |
| ALOX12    | AL390195.2 | 0.452135844  | 1.63E-28  | postive  |
| IREB2     | AL390195.2 | 0.412242677  | 1.58E-23  | postive  |
| GABPB1    | AL390195.2 | 0.568619742  | 1.72E-47  | postive  |
| MAPK8     | AL390195.2 | 0.517573231  | 2.89E-38  | postive  |
| LINC00472 | AL390195.2 | 0.587257506  | 2.82E-51  | postive  |
| ATM       | AL390195.2 | 0.702030346  | 3.31E-81  | postive  |
| FBXW7     | AL390195.2 | 0.48812339   | 1.29E-33  | postive  |
| ALOX12    | HOXA-AS2   | 0.407904107  | 5.03E-23  | postive  |
| PHKG2     | HOXA-AS2   | 0.431145396  | 8.27E-26  | postive  |
| TAZ       | HOXA-AS2   | 0.501475482  | 1.14E-35  | postive  |
| FANCD2    | LIX1L-AS1  | 0.403627517  | 1.55E-22  | postive  |
| HELLS     | LIX1L-AS1  | 0.475578507  | 9.07E-32  | postive  |
| ZNF419    | LIX1L-AS1  | 0.475359972  | 9.75E-32  | postive  |
| TUBE1     | LIX1L-AS1  | 0.483025066  | 7.41E-33  | postive  |
| ALOX12    | LIX1L-AS1  | 0.610982495  | 1.82E-56  | postive  |
| GABPB1    | LIX1L-AS1  | 0.422432963  | 9.70E-25  | postive  |
| FBXW7     | LIX1L-AS1  | 0.439726419  | 6.82E-27  | postive  |
| LURAP1L   | AL357033.2 | 0.414034287  | 9.73E-24  | postive  |
| KLHL24    | RBM26-AS1  | 0.434672645  | 2.99E-26  | postive  |
| TUBE1     | RBM26-AS1  | 0.491102855  | 4.57E-34  | postive  |
| IREB2     | RBM26-AS1  | 0.508558138  | 8.56E-37  | postive  |
| GABPB1    | RBM26-AS1  | 0.464576958  | 3.28E-30  | postive  |
| PIK3CA    | RBM26-AS1  | 0.40764179   | 5.39E-23  | postive  |
| MAPK8     | RBM26-AS1  | 0.509362004  | 6.35E-37  | postive  |
| LINC00472 | RBM26-AS1  | 0.547751597  | 1.58E-43  | postive  |
| PRKAA2    | RBM26-AS1  | 0.428647009  | 1.69E-25  | postive  |
| PRKAA1    | RBM26-AS1  | 0.461311522  | 9.28E-30  | postive  |
| ATM       | RBM26-AS1  | 0.604052343  | 6.63E-55  | postive  |
| ISCU      | ITGA9-AS1  | 0.464561219  | 3.30E-30  | postive  |
| KLHL24    | ITGA9-AS1  | 0.592505762  | 2.18E-52  | postive  |
| IREB2     | ITGA9-AS1  | 0.400438909  | 3.55E-22  | postive  |
| PIK3CA    | ITGA9-AS1  | 0.454879319  | 6.97E-29  | postive  |
| GABARAPL1 | ITGA9-AS1  | 0.462328658  | 6.72E-30  | postive  |
| LINC00472 | ITGA9-AS1  | 0.727781084  | 5.19E-90  | postive  |
| LPIN1     | ITGA9-AS1  | 0.514400555  | 9.63E-38  | postive  |
| HBA1      | AC011481.2 | 0.5583833    | 1.64E-45  | postive  |
| EGLN2     | AC011481.2 | 0.401862781  | 2.45E-22  | postive  |
| HELLS     | AC002128.1 | 0.478753313  | 3.14E-32  | postive  |
| ZNF419    | AC002128.1 | 0.602727113  | 1.30E-54  | postive  |
| TUBE1     | AC002128.1 | 0.603885096  | 7.22E-55  | postive  |
| SETD1B    | AC002128.1 | 0.447596323  | 6.49E-28  | postive  |
| ALOX12    | AC002128.1 | 0.648001737  | 1.67E-65  | postive  |
| GABPB1    | AC002128.1 | 0.52271025   | 4.00E-39  | postive  |

|           |            |              |           |          |
|-----------|------------|--------------|-----------|----------|
| LINC00472 | AC002128.1 | 0.544674151  | 5.77E-43  | postive  |
| LPIN1     | AC002128.1 | 0.420466912  | 1.67E-24  | postive  |
| ATM       | AC002128.1 | 0.602024326  | 1.87E-54  | postive  |
| TAZ       | AC002128.1 | 0.409136247  | 3.62E-23  | postive  |
| FBXW7     | AC002128.1 | 0.519343834  | 1.47E-38  | postive  |
| HELLS     | AC006480.2 | 0.445303728  | 1.30E-27  | postive  |
| ZNF419    | AC006480.2 | 0.451354577  | 2.07E-28  | postive  |
| KLHL24    | AC006480.2 | 0.436891789  | 1.57E-26  | postive  |
| TUBE1     | AC006480.2 | 0.498401628  | 3.46E-35  | postive  |
| ALOX12    | AC006480.2 | 0.465443047  | 2.48E-30  | postive  |
| GABPB1    | AC006480.2 | 0.513622249  | 1.29E-37  | postive  |
| LINC00472 | AC006480.2 | 0.817199339  | 1.30E-130 | postive  |
| LPIN1     | AC006480.2 | 0.427427835  | 2.39E-25  | postive  |
| ATM       | AC006480.2 | 0.504587659  | 3.69E-36  | postive  |
| FBXW7     | AC006480.2 | 0.41641661   | 5.09E-24  | postive  |
| HELLS     | PITRM1-AS1 | 0.410212817  | 2.72E-23  | postive  |
| ARNTL     | PITRM1-AS1 | 0.478676865  | 3.22E-32  | postive  |
| ZNF419    | PITRM1-AS1 | 0.409106225  | 3.65E-23  | postive  |
| VEGFA     | PITRM1-AS1 | 0.462401564  | 6.56E-30  | postive  |
| TUBE1     | PITRM1-AS1 | 0.551722506  | 2.93E-44  | postive  |
| ALOX12    | PITRM1-AS1 | 0.567636171  | 2.69E-47  | postive  |
| GABPB1    | PITRM1-AS1 | 0.476617295  | 6.42E-32  | postive  |
| MAPK8     | PITRM1-AS1 | 0.427029302  | 2.67E-25  | postive  |
| ATM       | PITRM1-AS1 | 0.629002611  | 1.03E-60  | postive  |
| FBXW7     | PITRM1-AS1 | 0.490657893  | 5.34E-34  | postive  |
| HELLS     | AP001001.1 | 0.434056801  | 3.58E-26  | postive  |
| ZNF419    | AP001001.1 | 0.447329565  | 7.04E-28  | postive  |
| KLHL24    | AP001001.1 | 0.454781286  | 7.18E-29  | postive  |
| TUBE1     | AP001001.1 | 0.558750379  | 1.40E-45  | postive  |
| ALOX12    | AP001001.1 | 0.512076805  | 2.31E-37  | postive  |
| IREB2     | AP001001.1 | 0.41061082   | 2.44E-23  | postive  |
| GABPB1    | AP001001.1 | 0.57614329   | 5.46E-49  | postive  |
| PIK3CA    | AP001001.1 | 0.407530614  | 5.55E-23  | postive  |
| MAPK8     | AP001001.1 | 0.438559362  | 9.62E-27  | postive  |
| LINC00472 | AP001001.1 | 0.809549088  | 2.56E-126 | postive  |
| ATM       | AP001001.1 | 0.672908048  | 2.51E-72  | postive  |
| FBXW7     | AP001001.1 | 0.48586279   | 2.81E-33  | postive  |
| RB1       | AL357054.4 | 0.432379911  | 5.80E-26  | postive  |
| HMGB1     | AL357054.4 | 0.49082202   | 5.04E-34  | postive  |
| GABPB1    | AL357054.4 | 0.41672934   | 4.68E-24  | postive  |
| ZEB1      | AL357054.4 | 0.428961867  | 1.54E-25  | postive  |
| TLR4      | AL357054.4 | 0.449526824  | 3.61E-28  | postive  |
| HELLS     | AC093690.1 | 0.581795231  | 3.85E-50  | postive  |
| TUBE1     | AC093690.1 | 0.491667941  | 3.75E-34  | postive  |
| ALOX12    | AC093690.1 | 0.522684552  | 4.04E-39  | postive  |
| GABPB1    | AC093690.1 | 0.539597969  | 4.72E-42  | postive  |
| LINC00472 | AC093690.1 | 0.618000349  | 4.36E-58  | postive  |
| ATM       | AC093690.1 | 0.732394354  | 1.07E-91  | postive  |
| FBXW7     | AC093690.1 | 0.50607228   | 2.14E-36  | postive  |
| TRIB3     | SNHG15     | 0.405739541  | 8.91E-23  | postive  |
| CXCL2     | SNHG15     | 0.406375851  | 7.53E-23  | postive  |
| SLC2A6    | SNHG15     | 0.400020588  | 3.96E-22  | postive  |
| NCOA4     | SNHG15     | -0.425549763 | 4.05E-25  | negative |
| PHKG2     | SNHG15     | 0.499900529  | 2.02E-35  | postive  |
| TAZ       | SNHG15     | 0.539083624  | 5.83E-42  | postive  |
| LAMP2     | AC005332.5 | -0.426036184 | 3.53E-25  | negative |
| CHMP5     | AC005332.5 | -0.426217165 | 3.36E-25  | negative |
| DRD4      | AC005332.5 | 0.487887993  | 1.40E-33  | postive  |

|           |            |              |           |          |
|-----------|------------|--------------|-----------|----------|
| ALOX12    | AC005332.5 | 0.51825832   | 2.22E-38  | postive  |
| NCOA4     | AC005332.5 | -0.49641506  | 7.02E-35  | negative |
| PHKG2     | AC005332.5 | 0.563093384  | 2.06E-46  | postive  |
| TAZ       | AC005332.5 | 0.713576222  | 4.93E-85  | postive  |
| ALOX12    | AC007406.2 | 0.412995326  | 1.29E-23  | postive  |
| PEBP1     | AC007406.2 | 0.414687027  | 8.15E-24  | postive  |
| MIOX      | AC007406.2 | 0.467998337  | 1.09E-30  | postive  |
| HELLS     | AC110015.1 | 0.632769069  | 1.23E-61  | postive  |
| ZNF419    | AC110015.1 | 0.428610577  | 1.71E-25  | postive  |
| ZFP69B    | AC110015.1 | 0.40358289   | 1.57E-22  | postive  |
| TUBE1     | AC110015.1 | 0.475201398  | 1.03E-31  | postive  |
| ALOX12    | AC110015.1 | 0.524529741  | 1.97E-39  | postive  |
| GABPB1    | AC110015.1 | 0.510509561  | 4.14E-37  | postive  |
| ATM       | AC110015.1 | 0.692372401  | 3.81E-78  | postive  |
| FBXW7     | AC110015.1 | 0.497675349  | 4.48E-35  | postive  |
| ALOX12    | HOXB-AS1   | 0.53007542   | 2.21E-40  | postive  |
| PHKG2     | HOXB-AS1   | 0.478642115  | 3.26E-32  | postive  |
| TAZ       | HOXB-AS1   | 0.600101873  | 4.94E-54  | postive  |
| TFAP2C    | AL645728.1 | 0.530664319  | 1.75E-40  | postive  |
| HBA1      | AL645728.1 | 0.446905052  | 8.00E-28  | postive  |
| KLHL24    | AC078993.1 | 0.454841523  | 7.05E-29  | postive  |
| LINC00472 | AC078993.1 | 0.645590942  | 7.08E-65  | postive  |
| ANGPTL7   | AP001107.5 | 0.499523575  | 2.31E-35  | postive  |
| LAMP2     | AL713998.1 | 0.513065483  | 1.59E-37  | postive  |
| FANCD2    | AC245014.3 | 0.417589804  | 3.69E-24  | postive  |
| HELLS     | AC245014.3 | 0.422537884  | 9.42E-25  | postive  |
| TFAP2C    | AC245014.3 | 0.528250517  | 4.57E-40  | postive  |
| HBA1      | AC245014.3 | 0.479990715  | 2.07E-32  | postive  |
| DUOX1     | AC245014.3 | 0.439970058  | 6.35E-27  | postive  |
| MAPK1     | LINC01671  | 0.478667989  | 3.23E-32  | postive  |
| PRKAA2    | LINC01671  | 0.408350041  | 4.47E-23  | postive  |
| HELLS     | AC068790.2 | 0.54673765   | 2.43E-43  | postive  |
| TUBE1     | AC068790.2 | 0.508853778  | 7.67E-37  | postive  |
| ALOX12    | AC068790.2 | 0.494785111  | 1.25E-34  | postive  |
| IREB2     | AC068790.2 | 0.425012092  | 4.71E-25  | postive  |
| GABPB1    | AC068790.2 | 0.592605767  | 2.08E-52  | postive  |
| PIK3CA    | AC068790.2 | 0.40376811   | 1.49E-22  | postive  |
| MAPK8     | AC068790.2 | 0.466090986  | 2.02E-30  | postive  |
| LINC00472 | AC068790.2 | 0.732459716  | 1.01E-91  | postive  |
| ATM       | AC068790.2 | 0.780495852  | 1.23E-111 | postive  |
| FBXW7     | AC068790.2 | 0.516221797  | 4.83E-38  | postive  |
| IREB2     | LINC00623  | -0.419746074 | 2.04E-24  | negative |
| PHKG2     | LINC00623  | 0.505780506  | 2.38E-36  | postive  |
| MAPK1     | LINC00623  | -0.470775888 | 4.41E-31  | negative |
| BID       | LINC00623  | 0.420918728  | 1.48E-24  | postive  |
| MAPK8     | LINC00623  | -0.435505361 | 2.35E-26  | negative |
| PRKAA2    | LINC00623  | -0.442464705 | 3.03E-27  | negative |
| FANCD2    | ZNF529-AS1 | 0.491499354  | 3.98E-34  | postive  |
| HELLS     | ZNF529-AS1 | 0.503805023  | 4.91E-36  | postive  |
| ZNF419    | ZNF529-AS1 | 0.51053663   | 4.10E-37  | postive  |
| ALOX12    | ZNF529-AS1 | 0.47962166   | 2.35E-32  | postive  |
| TFAP2C    | ZNF529-AS1 | 0.405161582  | 1.04E-22  | postive  |
| HELLS     | AL031282.2 | 0.414797452  | 7.91E-24  | postive  |
| ZNF419    | AL031282.2 | 0.509408405  | 6.24E-37  | postive  |
| VEGFA     | AL031282.2 | 0.409153196  | 3.61E-23  | postive  |
| TUBE1     | AL031282.2 | 0.520157922  | 1.07E-38  | postive  |
| SETD1B    | AL031282.2 | 0.495594238  | 9.40E-35  | postive  |
| ALOX12    | AL031282.2 | 0.713996125  | 3.55E-85  | postive  |

|           |            |              |           |          |
|-----------|------------|--------------|-----------|----------|
| ATM       | AL031282.2 | 0.512968782  | 1.65E-37  | postive  |
| YY1AP1    | AL031282.2 | 0.426859166  | 2.80E-25  | postive  |
| FBXW7     | AL031282.2 | 0.471760484  | 3.20E-31  | postive  |
| KLHL24    | AC025917.1 | 0.621492275  | 6.57E-59  | postive  |
| TUBE1     | AC025917.1 | 0.407303336  | 5.90E-23  | postive  |
| IREB2     | AC025917.1 | 0.495946304  | 8.30E-35  | postive  |
| GABPB1    | AC025917.1 | 0.52667882   | 8.49E-40  | postive  |
| PIK3CA    | AC025917.1 | 0.532900608  | 7.16E-41  | postive  |
| KRAS      | AC025917.1 | 0.461175602  | 9.69E-30  | postive  |
| MAPK8     | AC025917.1 | 0.457610704  | 2.98E-29  | postive  |
| LINC00472 | AC025917.1 | 0.94502142   | 7.57E-263 | postive  |
| PRKAA1    | AC025917.1 | 0.440761703  | 5.02E-27  | postive  |
| LPIN1     | AC025917.1 | 0.419823083  | 2.00E-24  | postive  |
| ATM       | AC025917.1 | 0.539610709  | 4.70E-42  | postive  |
| HELLS     | AC011247.1 | 0.524265639  | 2.18E-39  | postive  |
| TUBE1     | AC011247.1 | 0.41261058   | 1.43E-23  | postive  |
| ALOX12    | AC011247.1 | 0.409468491  | 3.32E-23  | postive  |
| GABPB1    | AC011247.1 | 0.541471993  | 2.18E-42  | postive  |
| ATG7      | AC011247.1 | 0.430538888  | 9.84E-26  | postive  |
| LINC00472 | AC011247.1 | 0.673953727  | 1.25E-72  | postive  |
| ATM       | AC011247.1 | 0.607793798  | 9.62E-56  | postive  |
| FBXW7     | AC011247.1 | 0.442416266  | 3.07E-27  | postive  |
| HELLS     | AC010998.2 | 0.496259906  | 7.42E-35  | postive  |
| ZNF419    | AC010998.2 | 0.479855007  | 2.17E-32  | postive  |
| VEGFA     | AC010998.2 | 0.402138232  | 2.29E-22  | postive  |
| TUBE1     | AC010998.2 | 0.566371149  | 4.76E-47  | postive  |
| SETD1B    | AC010998.2 | 0.403515215  | 1.60E-22  | postive  |
| ALOX12    | AC010998.2 | 0.713834999  | 4.02E-85  | postive  |
| GABPB1    | AC010998.2 | 0.426455923  | 3.14E-25  | postive  |
| ATM       | AC010998.2 | 0.593374132  | 1.42E-52  | postive  |
| FBXW7     | AC010998.2 | 0.45178018   | 1.81E-28  | postive  |
| KLHL24    | AL139022.2 | 0.530879551  | 1.61E-40  | postive  |
| IREB2     | AL139022.2 | 0.454381135  | 8.13E-29  | postive  |
| GABPB1    | AL139022.2 | 0.546624902  | 2.55E-43  | postive  |
| PIK3CA    | AL139022.2 | 0.479849559  | 2.17E-32  | postive  |
| KRAS      | AL139022.2 | 0.434493446  | 3.15E-26  | postive  |
| MAPK8     | AL139022.2 | 0.441941971  | 3.54E-27  | postive  |
| LINC00472 | AL139022.2 | 0.877659065  | 1.18E-173 | postive  |
| PRKAA1    | AL139022.2 | 0.431384834  | 7.72E-26  | postive  |
| ATM       | AL139022.2 | 0.54357978   | 9.10E-43  | postive  |
| TFAP2C    | AC074032.1 | 0.404082426  | 1.38E-22  | postive  |
| HBA1      | AC074032.1 | 0.578451343  | 1.86E-49  | postive  |
| EGLN2     | AC074032.1 | 0.46187972   | 7.75E-30  | postive  |
| ZNF419    | AC048382.2 | 0.568534999  | 1.79E-47  | postive  |
| KLHL24    | AC048382.2 | 0.424789528  | 5.02E-25  | postive  |
| TUBE1     | AC048382.2 | 0.561270014  | 4.62E-46  | postive  |
| SETD1B    | AC048382.2 | 0.441927705  | 3.56E-27  | postive  |
| ALOX12    | AC048382.2 | 0.526849568  | 7.94E-40  | postive  |
| GABPB1    | AC048382.2 | 0.473555886  | 1.77E-31  | postive  |
| LINC00472 | AC048382.2 | 0.724591496  | 7.25E-89  | postive  |
| ATM       | AC048382.2 | 0.479865477  | 2.16E-32  | postive  |
| FBXW7     | AC048382.2 | 0.433756521  | 3.90E-26  | postive  |
| LAMP2     | AC137630.3 | -0.404837156 | 1.13E-22  | negative |
| HIC1      | AC137630.3 | 0.407215702  | 6.03E-23  | postive  |
| HRAS      | AC137630.3 | 0.436156016  | 1.94E-26  | postive  |
| NCOA4     | AC137630.3 | -0.482597594 | 8.58E-33  | negative |
| PHKG2     | AC137630.3 | 0.47250336   | 2.50E-31  | postive  |
| TAZ       | AC137630.3 | 0.5237912    | 2.63E-39  | postive  |

|           |            |              |           |          |
|-----------|------------|--------------|-----------|----------|
| ISCU      | MMEL1-AS1  | 0.404188111  | 1.34E-22  | postive  |
| KLHL24    | MMEL1-AS1  | 0.428964329  | 1.54E-25  | postive  |
| BRD4      | AL021707.6 | 0.431304348  | 7.90E-26  | postive  |
| ZNF419    | AL021707.6 | 0.524172065  | 2.27E-39  | postive  |
| TUBE1     | AL021707.6 | 0.424984932  | 4.75E-25  | postive  |
| DRD4      | AL021707.6 | 0.459719897  | 1.53E-29  | postive  |
| ALOX12    | AL021707.6 | 0.433541496  | 4.15E-26  | postive  |
| HRAS      | AL021707.6 | 0.489853238  | 7.07E-34  | postive  |
| NCOA4     | AL021707.6 | -0.444785678 | 1.51E-27  | negative |
| PHKG2     | AL021707.6 | 0.625940794  | 5.69E-60  | postive  |
| SOCS1     | AL021707.6 | 0.43446964   | 3.17E-26  | postive  |
| EGLN2     | AL021707.6 | 0.62378146   | 1.87E-59  | postive  |
| TAZ       | AL021707.6 | 0.731639739  | 2.03E-91  | postive  |
| FANCD2    | U73166.1   | 0.462775979  | 5.83E-30  | postive  |
| ZNF419    | U73166.1   | 0.419147541  | 2.41E-24  | postive  |
| TFAP2C    | U73166.1   | 0.550069593  | 5.93E-44  | postive  |
| HBA1      | U73166.1   | 0.405462158  | 9.58E-23  | postive  |
| DUOX1     | U73166.1   | 0.405919611  | 8.49E-23  | postive  |
| LPIN1     | U73166.1   | 0.409913771  | 2.95E-23  | postive  |
| FH        | LINC00886  | 0.41651254   | 4.96E-24  | postive  |
| ISCU      | LINC00886  | 0.517763596  | 2.69E-38  | postive  |
| HERPUD1   | LINC00886  | 0.469702838  | 6.26E-31  | postive  |
| KLHL24    | LINC00886  | 0.499705201  | 2.16E-35  | postive  |
| SLC2A12   | LINC00886  | 0.4960063    | 8.12E-35  | postive  |
| CS        | LINC00886  | 0.422048748  | 1.08E-24  | postive  |
| GOT1      | LINC00886  | 0.451328646  | 2.08E-28  | postive  |
| ATG4D     | LINC00886  | 0.494318853  | 1.48E-34  | postive  |
| GABARAPL1 | LINC00886  | 0.695469131  | 4.10E-79  | postive  |
| WIPI2     | LINC00886  | 0.448433747  | 5.04E-28  | postive  |
| LPIN1     | LINC00886  | 0.53430343   | 4.07E-41  | postive  |
| SLC2A8    | RNF207-AS1 | 0.44188544   | 3.60E-27  | postive  |
| HBA1      | RNF207-AS1 | 0.428376976  | 1.82E-25  | postive  |
| HRAS      | RNF207-AS1 | 0.570721508  | 6.63E-48  | postive  |
| MAP1LC3A  | RNF207-AS1 | 0.459736505  | 1.53E-29  | postive  |
| EGLN2     | RNF207-AS1 | 0.642291955  | 5.00E-64  | postive  |
| KLHL24    | NBAT1      | 0.571710098  | 4.22E-48  | postive  |
| IREB2     | NBAT1      | 0.455294781  | 6.13E-29  | postive  |
| GABPB1    | NBAT1      | 0.429787263  | 1.22E-25  | postive  |
| PIK3CA    | NBAT1      | 0.480497278  | 1.75E-32  | postive  |
| LINC00472 | NBAT1      | 0.85315318   | 6.96E-154 | postive  |
| ATM       | NBAT1      | 0.425027223  | 4.69E-25  | postive  |
| ALOX12    | SPAG5-AS1  | 0.421019936  | 1.44E-24  | postive  |
| SRC       | MRPL20-AS1 | 0.422808407  | 8.73E-25  | postive  |
| OTUB1     | MRPL20-AS1 | 0.415055623  | 7.38E-24  | postive  |
| PHKG2     | MRPL20-AS1 | 0.461272022  | 9.39E-30  | postive  |
| LINC00472 | AC011503.2 | 0.518010871  | 2.44E-38  | postive  |
| LPIN1     | AC011503.2 | 0.454528189  | 7.77E-29  | postive  |
| HELLS     | AC090948.2 | 0.517815265  | 2.63E-38  | postive  |
| KLHL24    | AC090948.2 | 0.433669319  | 4.00E-26  | postive  |
| TUBE1     | AC090948.2 | 0.422973822  | 8.34E-25  | postive  |
| ALOX12    | AC090948.2 | 0.41581872   | 5.99E-24  | postive  |
| IREB2     | AC090948.2 | 0.466548995  | 1.74E-30  | postive  |
| GABPB1    | AC090948.2 | 0.574879082  | 9.82E-49  | postive  |
| PIK3CA    | AC090948.2 | 0.453692759  | 1.01E-28  | postive  |
| ATG7      | AC090948.2 | 0.515849756  | 5.56E-38  | postive  |
| MAPK8     | AC090948.2 | 0.425867715  | 3.71E-25  | postive  |
| LINC00472 | AC090948.2 | 0.762253254  | 1.62E-103 | postive  |
| ATM       | AC090948.2 | 0.750220645  | 1.50E-98  | postive  |

|           |            |              |          |          |
|-----------|------------|--------------|----------|----------|
| FBXW7     | AC090948.2 | 0.487616869  | 1.54E-33 | postive  |
| SLC3A2    | AC097359.2 | 0.447683347  | 6.32E-28 | postive  |
| NFS1      | AC097359.2 | 0.444427526  | 1.69E-27 | postive  |
| FH        | AC097359.2 | 0.491217874  | 4.39E-34 | postive  |
| ISCU      | AC097359.2 | 0.530069899  | 2.22E-40 | postive  |
| VLDLR     | AC097359.2 | 0.406165699  | 7.96E-23 | postive  |
| KLHL24    | AC097359.2 | 0.42414214   | 6.02E-25 | postive  |
| ATP5MC3   | AC097359.2 | 0.465216617  | 2.67E-30 | postive  |
| SLC2A12   | AC097359.2 | 0.620150105  | 1.36E-58 | postive  |
| ELAVL1    | AC097359.2 | 0.41071258   | 2.38E-23 | postive  |
| CS        | AC097359.2 | 0.463549898  | 4.55E-30 | postive  |
| GOT1      | AC097359.2 | 0.509175582  | 6.81E-37 | postive  |
| ACO1      | AC097359.2 | 0.572265637  | 3.27E-48 | postive  |
| ATG4D     | AC097359.2 | 0.409179935  | 3.58E-23 | postive  |
| GABARAPL1 | AC097359.2 | 0.512573917  | 1.92E-37 | postive  |
| WIP1      | AC097359.2 | 0.422077946  | 1.07E-24 | postive  |
| WIP2      | AC097359.2 | 0.674023766  | 1.20E-72 | postive  |
| LPIN1     | AC097359.2 | 0.427557379  | 2.30E-25 | postive  |
| SLC3A2    | ATP6V0E2-A | 0.505574808  | 2.57E-36 | postive  |
| FH        | ATP6V0E2-A | 0.462927072  | 5.55E-30 | postive  |
| ISCU      | ATP6V0E2-A | 0.631901942  | 2.02E-61 | postive  |
| DDIT3     | ATP6V0E2-A | 0.510823227  | 3.69E-37 | postive  |
| SLC2A8    | ATP6V0E2-A | 0.482199305  | 9.82E-33 | postive  |
| SLC2A12   | ATP6V0E2-A | 0.630541728  | 4.35E-61 | postive  |
| CS        | ATP6V0E2-A | 0.480668149  | 1.65E-32 | postive  |
| GOT1      | ATP6V0E2-A | 0.472791302  | 2.28E-31 | postive  |
| ATG4D     | ATP6V0E2-A | 0.604959918  | 4.16E-55 | postive  |
| MAP1LC3A  | ATP6V0E2-A | 0.427135025  | 2.59E-25 | postive  |
| GABARAPL1 | ATP6V0E2-A | 0.537719451  | 1.02E-41 | postive  |
| WIP2      | ATP6V0E2-A | 0.621367123  | 7.03E-59 | postive  |
| LPIN1     | ATP6V0E2-A | 0.595749091  | 4.39E-53 | postive  |
| ZNF419    | AL356481.1 | 0.50494868   | 3.23E-36 | postive  |
| TUBE1     | AL356481.1 | 0.559143834  | 1.18E-45 | postive  |
| ALOX12    | AL356481.1 | 0.502333774  | 8.38E-36 | postive  |
| GABPB1    | AL356481.1 | 0.47273512   | 2.32E-31 | postive  |
| ATM       | AL356481.1 | 0.411162761  | 2.11E-23 | postive  |
| HELLS     | AL096701.3 | 0.416466318  | 5.02E-24 | postive  |
| ZNF419    | AL096701.3 | 0.500621419  | 1.56E-35 | postive  |
| TUBE1     | AL096701.3 | 0.535328499  | 2.69E-41 | postive  |
| ALOX12    | AL096701.3 | 0.539192957  | 5.57E-42 | postive  |
| GABPB1    | AL096701.3 | 0.43543933   | 2.39E-26 | postive  |
| PHKG2     | AL096701.3 | 0.476479155  | 6.72E-32 | postive  |
| LINC00472 | AL096701.3 | 0.416362833  | 5.17E-24 | postive  |
| ATM       | AL096701.3 | 0.413924559  | 1.00E-23 | postive  |
| TAZ       | AL096701.3 | 0.598807087  | 9.50E-54 | postive  |
| FBXW7     | AL096701.3 | 0.474539498  | 1.28E-31 | postive  |
| HELLS     | AC004832.5 | 0.572924731  | 2.42E-48 | postive  |
| TUBE1     | AC004832.5 | 0.459276264  | 1.76E-29 | postive  |
| ALOX12    | AC004832.5 | 0.496453828  | 6.93E-35 | postive  |
| GABPB1    | AC004832.5 | 0.534876776  | 3.23E-41 | postive  |
| LINC00472 | AC004832.5 | 0.59171444   | 3.22E-52 | postive  |
| ATM       | AC004832.5 | 0.711650796  | 2.21E-84 | postive  |
| FBXW7     | AC004832.5 | 0.488859568  | 9.98E-34 | postive  |
| NOX1      | AC067838.1 | 0.498436673  | 3.41E-35 | postive  |
| NCOA4     | AC067838.1 | -0.421234646 | 1.35E-24 | negative |
| PHKG2     | AC067838.1 | 0.495872575  | 8.52E-35 | postive  |
| BECN1     | AC067838.1 | -0.470546561 | 4.76E-31 | negative |
| TAZ       | AC067838.1 | 0.466872985  | 1.57E-30 | postive  |

|           |            |              |           |          |
|-----------|------------|--------------|-----------|----------|
| HELLS     | AC004832.4 | 0.548844968  | 9.98E-44  | postive  |
| TUBE1     | AC004832.4 | 0.448432575  | 5.04E-28  | postive  |
| ALOX12    | AC004832.4 | 0.447018135  | 7.73E-28  | postive  |
| GABPB1    | AC004832.4 | 0.528810417  | 3.66E-40  | postive  |
| ATG7      | AC004832.4 | 0.401012966  | 3.06E-22  | postive  |
| LINC00472 | AC004832.4 | 0.605122456  | 3.83E-55  | postive  |
| ATM       | AC004832.4 | 0.719961093  | 3.12E-87  | postive  |
| FBXW7     | AC004832.4 | 0.470081219  | 5.54E-31  | postive  |
| HELLS     | AC131953.1 | 0.436065617  | 2.00E-26  | postive  |
| ZNF419    | AC131953.1 | 0.49893248   | 2.86E-35  | postive  |
| TUBE1     | AC131953.1 | 0.483755466  | 5.78E-33  | postive  |
| ALOX12    | AC131953.1 | 0.470536225  | 4.77E-31  | postive  |
| GABPB1    | AC131953.1 | 0.556287885  | 4.10E-45  | postive  |
| LINC00472 | AC131953.1 | 0.637359632  | 8.88E-63  | postive  |
| ATM       | AC131953.1 | 0.604817519  | 4.47E-55  | postive  |
| FBXW7     | AC131953.1 | 0.53047925   | 1.89E-40  | postive  |
| ENPP2     | AC093278.2 | 0.496241763  | 7.47E-35  | postive  |
| SLC1A4    | AC093278.2 | 0.555467285  | 5.85E-45  | postive  |
| LURAP1L   | AC093278.2 | 0.408795802  | 3.97E-23  | postive  |
| IL33      | AC093278.2 | 0.451439674  | 2.01E-28  | postive  |
| HMGB1     | AC093278.2 | 0.49309891   | 2.27E-34  | postive  |
| CAPG      | AC093278.2 | -0.404938612 | 1.10E-22  | negative |
| MAPK3     | AC093278.2 | 0.46935435   | 7.01E-31  | postive  |
| ZEB1      | AC093278.2 | 0.762778624  | 9.70E-104 | postive  |
| MAPK8     | AC093278.2 | 0.444843559  | 1.49E-27  | postive  |
| EPAS1     | AC093278.2 | 0.79358705   | 5.86E-118 | postive  |
| SIRT1     | AC093278.2 | 0.478467037  | 3.46E-32  | postive  |
| ZNF419    | RNF213-AS1 | 0.432326379  | 5.89E-26  | postive  |
| VEGFA     | RNF213-AS1 | 0.507475468  | 1.28E-36  | postive  |
| TUBE1     | RNF213-AS1 | 0.651819458  | 1.66E-66  | postive  |
| SETD1B    | RNF213-AS1 | 0.409755173  | 3.07E-23  | postive  |
| ALOX12    | RNF213-AS1 | 0.663859946  | 9.00E-70  | postive  |
| GABPB1    | RNF213-AS1 | 0.433617817  | 4.06E-26  | postive  |
| ATM       | RNF213-AS1 | 0.541767417  | 1.93E-42  | postive  |
| TAZ       | RNF213-AS1 | 0.427502974  | 2.34E-25  | postive  |
| FBXW7     | RNF213-AS1 | 0.427868697  | 2.11E-25  | postive  |
| HSPA5     | AC009118.3 | -0.402928635 | 1.86E-22  | negative |
| ZNF419    | AC009118.3 | 0.57202312   | 3.66E-48  | postive  |
| TUBE1     | AC009118.3 | 0.605504924  | 3.14E-55  | postive  |
| SETD1B    | AC009118.3 | 0.402621038  | 2.02E-22  | postive  |
| ALOX12    | AC009118.3 | 0.563326132  | 1.86E-46  | postive  |
| GABPB1    | AC009118.3 | 0.449446583  | 3.70E-28  | postive  |
| PHKG2     | AC009118.3 | 0.518573529  | 1.97E-38  | postive  |
| TAZ       | AC009118.3 | 0.647249541  | 2.63E-65  | postive  |
| FBXW7     | AC009118.3 | 0.419986317  | 1.91E-24  | postive  |
| HELLS     | AC116158.1 | 0.561108717  | 4.96E-46  | postive  |
| TUBE1     | AC116158.1 | 0.462384966  | 6.60E-30  | postive  |
| ALOX12    | AC116158.1 | 0.449096352  | 4.12E-28  | postive  |
| GABPB1    | AC116158.1 | 0.557532346  | 2.38E-45  | postive  |
| ATG7      | AC116158.1 | 0.491704696  | 3.70E-34  | postive  |
| MAPK8     | AC116158.1 | 0.405646284  | 9.13E-23  | postive  |
| LINC00472 | AC116158.1 | 0.589083676  | 1.16E-51  | postive  |
| ATM       | AC116158.1 | 0.773658166  | 1.67E-108 | postive  |
| FBXW7     | AC116158.1 | 0.489407867  | 8.25E-34  | postive  |
| MTOR      | AP003486.1 | 0.444100769  | 1.86E-27  | postive  |
| RPL8      | AP003486.1 | -0.444574103 | 1.61E-27  | negative |
| LINC00472 | AP003486.1 | 0.507299576  | 1.36E-36  | postive  |
| LPIN1     | AP003486.1 | 0.438300305  | 1.04E-26  | postive  |

|           |            |             |           |         |
|-----------|------------|-------------|-----------|---------|
| TUBE1     | AC005208.1 | 0.443081829 | 2.52E-27  | postive |
| ALOX12    | AC005208.1 | 0.565812701 | 6.11E-47  | postive |
| ATM       | AC005208.1 | 0.63464584  | 4.23E-62  | postive |
| HELLS     | AC087854.1 | 0.466051601 | 2.04E-30  | postive |
| ZNF419    | AC087854.1 | 0.402348643 | 2.16E-22  | postive |
| KLHL24    | AC087854.1 | 0.438092543 | 1.10E-26  | postive |
| TUBE1     | AC087854.1 | 0.42316983  | 7.90E-25  | postive |
| IREB2     | AC087854.1 | 0.52048443  | 9.46E-39  | postive |
| GABPB1    | AC087854.1 | 0.627637459 | 2.22E-60  | postive |
| PIK3CA    | AC087854.1 | 0.500727226 | 1.50E-35  | postive |
| KRAS      | AC087854.1 | 0.427102919 | 2.62E-25  | postive |
| ATG7      | AC087854.1 | 0.416859522 | 4.51E-24  | postive |
| ZEB1      | AC087854.1 | 0.482148986 | 9.99E-33  | postive |
| MAPK8     | AC087854.1 | 0.541232901 | 2.41E-42  | postive |
| LINC00472 | AC087854.1 | 0.689544875 | 2.85E-77  | postive |
| PRKAA2    | AC087854.1 | 0.402454084 | 2.11E-22  | postive |
| PRKAA1    | AC087854.1 | 0.42939772  | 1.36E-25  | postive |
| ATM       | AC087854.1 | 0.698266542 | 5.34E-80  | postive |
| FBXW7     | AC087854.1 | 0.524057562 | 2.37E-39  | postive |
| FANCD2    | AC092910.3 | 0.439493592 | 7.31E-27  | postive |
| HELLS     | AC092910.3 | 0.422144221 | 1.05E-24  | postive |
| ZNF419    | AC092910.3 | 0.587197518 | 2.90E-51  | postive |
| KLHL24    | AC092910.3 | 0.411506568 | 1.92E-23  | postive |
| TUBE1     | AC092910.3 | 0.546122525 | 3.14E-43  | postive |
| SETD1B    | AC092910.3 | 0.433960661 | 3.68E-26  | postive |
| ALOX12    | AC092910.3 | 0.626732784 | 3.67E-60  | postive |
| GABPB1    | AC092910.3 | 0.525199784 | 1.52E-39  | postive |
| LINC00472 | AC092910.3 | 0.494211043 | 1.53E-34  | postive |
| LPIN1     | AC092910.3 | 0.431741181 | 6.97E-26  | postive |
| ATM       | AC092910.3 | 0.496471176 | 6.88E-35  | postive |
| FBXW7     | AC092910.3 | 0.404036403 | 1.39E-22  | postive |
| HSPB1     | AC015917.2 | 0.425072863 | 4.63E-25  | postive |
| HBA1      | AC015917.2 | 0.541476845 | 2.18E-42  | postive |
| HRAS      | AC015917.2 | 0.548285837 | 1.26E-43  | postive |
| EGLN2     | AC015917.2 | 0.588187755 | 1.80E-51  | postive |
| FANCD2    | AC133550.3 | 0.437666477 | 1.25E-26  | postive |
| HELLS     | AC133550.3 | 0.420784182 | 1.53E-24  | postive |
| ALOX12    | AC133550.3 | 0.530402541 | 1.94E-40  | postive |
| TFAP2C    | AC133550.3 | 0.501238529 | 1.25E-35  | postive |
| HBA1      | AC133550.3 | 0.434041105 | 3.59E-26  | postive |
| DUOX1     | AC133550.3 | 0.445426022 | 1.25E-27  | postive |
| HELLS     | AP005131.5 | 0.522087469 | 5.09E-39  | postive |
| GABPB1    | AP005131.5 | 0.501115111 | 1.30E-35  | postive |
| ATG7      | AP005131.5 | 0.448666743 | 4.69E-28  | postive |
| LINC00472 | AP005131.5 | 0.555964404 | 4.72E-45  | postive |
| ATM       | AP005131.5 | 0.685275838 | 5.69E-76  | postive |
| FBXW7     | AP005131.5 | 0.467620344 | 1.23E-30  | postive |
| ZNF419    | AL158196.1 | 0.441642539 | 3.87E-27  | postive |
| TUBE1     | AL158196.1 | 0.492030239 | 3.30E-34  | postive |
| ALOX12    | AL158196.1 | 0.535924713 | 2.11E-41  | postive |
| ATM       | AL158196.1 | 0.454596779 | 7.61E-29  | postive |
| TAZ       | AL158196.1 | 0.502193666 | 8.81E-36  | postive |
| TUBE1     | AC011472.4 | 0.47514138  | 1.05E-31  | postive |
| GABPB1    | AC011472.4 | 0.51447512  | 9.36E-38  | postive |
| LINC00472 | AC011472.4 | 0.781782496 | 3.09E-112 | postive |
| ATM       | AC011472.4 | 0.546151496 | 3.11E-43  | postive |
| FBXW7     | AC011472.4 | 0.420213594 | 1.79E-24  | postive |
| HELLS     | AC012358.2 | 0.551640659 | 3.04E-44  | postive |



|           |            |              |           |          |
|-----------|------------|--------------|-----------|----------|
| TUBE1     | AC012358.2 | 0.48061016   | 1.68E-32  | postive  |
| ALOX12    | AC012358.2 | 0.485601281  | 3.07E-33  | postive  |
| GABPB1    | AC012358.2 | 0.506608263  | 1.76E-36  | postive  |
| LINC00472 | AC012358.2 | 0.521941513  | 5.39E-39  | postive  |
| ATM       | AC012358.2 | 0.59599644   | 3.88E-53  | postive  |
| FBXW7     | AC012358.2 | 0.460767676  | 1.10E-29  | postive  |
| ALOX12    | AC020779.2 | 0.458854004  | 2.01E-29  | postive  |
| MAPK8     | AC020779.2 | 0.433156874  | 4.64E-26  | postive  |
| ATM       | AC020779.2 | 0.407043284  | 6.31E-23  | postive  |
| BRD4      | AC037459.2 | 0.464710006  | 3.14E-30  | postive  |
| ZNF419    | AC037459.2 | 0.54668533   | 2.48E-43  | postive  |
| VEGFA     | AC037459.2 | 0.508257217  | 9.56E-37  | postive  |
| TUBE1     | AC037459.2 | 0.541709964  | 1.98E-42  | postive  |
| SETD1B    | AC037459.2 | 0.644446765  | 1.40E-64  | postive  |
| ALOX12    | AC037459.2 | 0.630317195  | 4.93E-61  | postive  |
| ATM       | AC037459.2 | 0.411494658  | 1.93E-23  | postive  |
| YY1AP1    | AC037459.2 | 0.409852116  | 2.99E-23  | postive  |
| TAZ       | AC037459.2 | 0.42908508   | 1.49E-25  | postive  |
| FBXW7     | AC037459.2 | 0.417381646  | 3.91E-24  | postive  |
| SLC40A1   | AC005261.3 | -0.400745301 | 3.28E-22  | negative |
| ZNF419    | AC005261.3 | 0.411782222  | 1.79E-23  | postive  |
| MAPK14    | AC005261.3 | -0.415833445 | 5.97E-24  | negative |
| IREB2     | AC005261.3 | -0.414893395 | 7.71E-24  | negative |
| NOX1      | AC005261.3 | 0.522345617  | 4.61E-39  | postive  |
| LPCAT3    | AC005261.3 | -0.471326041 | 3.69E-31  | negative |
| NRAS      | AC005261.3 | -0.427470405 | 2.36E-25  | negative |
| HRAS      | AC005261.3 | 0.410992803  | 2.21E-23  | postive  |
| NCOA4     | AC005261.3 | -0.613010699 | 6.25E-57  | negative |
| PHKG2     | AC005261.3 | 0.580014067  | 8.93E-50  | postive  |
| BECN1     | AC005261.3 | -0.514597981 | 8.94E-38  | negative |
| MAPK1     | AC005261.3 | -0.489861904 | 7.05E-34  | negative |
| ANO6      | AC005261.3 | -0.441209632 | 4.40E-27  | negative |
| TAZ       | AC005261.3 | 0.564677419  | 1.02E-46  | postive  |
| MTDH      | AC005261.3 | -0.409301106 | 3.47E-23  | negative |
| HELLS     | AL138787.2 | 0.579209359  | 1.30E-49  | postive  |
| TUBE1     | AL138787.2 | 0.498659689  | 3.15E-35  | postive  |
| ALOX12    | AL138787.2 | 0.496930498  | 5.85E-35  | postive  |
| GABPB1    | AL138787.2 | 0.555247838  | 6.43E-45  | postive  |
| LINC00472 | AL138787.2 | 0.617259546  | 6.49E-58  | postive  |
| ATM       | AL138787.2 | 0.683578829  | 1.85E-75  | postive  |
| FBXW7     | AL138787.2 | 0.53062854   | 1.78E-40  | postive  |
| ZFP36     | MYADM-AS1  | 0.423545276  | 7.11E-25  | postive  |
| HELLS     | AP005482.2 | 0.48158234   | 1.21E-32  | postive  |
| ZNF419    | AP005482.2 | 0.412493064  | 1.48E-23  | postive  |
| KLHL24    | AP005482.2 | 0.424404907  | 5.59E-25  | postive  |
| TUBE1     | AP005482.2 | 0.457072813  | 3.52E-29  | postive  |
| GABPB1    | AP005482.2 | 0.65337159   | 6.40E-67  | postive  |
| MAPK8     | AP005482.2 | 0.433303774  | 4.45E-26  | postive  |
| LINC00472 | AP005482.2 | 0.69835427   | 5.01E-80  | postive  |
| ATM       | AP005482.2 | 0.517296534  | 3.21E-38  | postive  |
| FBXW7     | AP005482.2 | 0.524404267  | 2.07E-39  | postive  |
| HELLS     | AC087500.1 | 0.438759819  | 9.07E-27  | postive  |
| ZNF419    | AC087500.1 | 0.566782719  | 3.95E-47  | postive  |
| VEGFA     | AC087500.1 | 0.449958812  | 3.17E-28  | postive  |
| TUBE1     | AC087500.1 | 0.649524698  | 6.67E-66  | postive  |
| SETD1B    | AC087500.1 | 0.453045408  | 1.23E-28  | postive  |
| ALOX12    | AC087500.1 | 0.796755039  | 1.47E-119 | postive  |
| ATM       | AC087500.1 | 0.510110032  | 4.81E-37  | postive  |

|           |            |             |           |         |
|-----------|------------|-------------|-----------|---------|
| YY1AP1    | AC087500.1 | 0.436915771 | 1.56E-26  | postive |
| TAZ       | AC087500.1 | 0.511662596 | 2.69E-37  | postive |
| ZNF419    | AC092111.1 | 0.40411237  | 1.37E-22  | postive |
| ALOX12    | LINC01058  | 0.432303652 | 5.93E-26  | postive |
| HELLS     | ADNP-AS1   | 0.409616189 | 3.19E-23  | postive |
| ZNF419    | ADNP-AS1   | 0.493742729 | 1.81E-34  | postive |
| KLHL24    | ADNP-AS1   | 0.506614719 | 1.75E-36  | postive |
| TUBE1     | ADNP-AS1   | 0.511087159 | 3.34E-37  | postive |
| ALOX12    | ADNP-AS1   | 0.409967754 | 2.90E-23  | postive |
| GABPB1    | ADNP-AS1   | 0.501162952 | 1.28E-35  | postive |
| MAPK8     | ADNP-AS1   | 0.400496247 | 3.50E-22  | postive |
| LINC00472 | ADNP-AS1   | 0.769081322 | 1.82E-106 | postive |
| LPIN1     | ADNP-AS1   | 0.421821373 | 1.15E-24  | postive |
| ATM       | ADNP-AS1   | 0.524428486 | 2.05E-39  | postive |
| FBXW7     | ADNP-AS1   | 0.402334423 | 2.17E-22  | postive |
| HELLS     | AC004223.4 | 0.576913788 | 3.82E-49  | postive |
| TUBE1     | AC004223.4 | 0.493243561 | 2.16E-34  | postive |
| ALOX12    | AC004223.4 | 0.522417872 | 4.48E-39  | postive |
| GABPB1    | AC004223.4 | 0.509501457 | 6.03E-37  | postive |
| LINC00472 | AC004223.4 | 0.413333468 | 1.18E-23  | postive |
| ATM       | AC004223.4 | 0.731601787 | 2.10E-91  | postive |
| FBXW7     | AC004223.4 | 0.527855284 | 5.34E-40  | postive |
| HELLS     | AC099343.2 | 0.50798325  | 1.06E-36  | postive |
| TUBE1     | AC099343.2 | 0.430913813 | 8.84E-26  | postive |
| GABPB1    | AC099343.2 | 0.59444015  | 8.40E-53  | postive |
| ATG7      | AC099343.2 | 0.440651645 | 5.19E-27  | postive |
| LINC00472 | AC099343.2 | 0.715099995 | 1.49E-85  | postive |
| LPIN1     | AC099343.2 | 0.437709716 | 1.23E-26  | postive |
| ATM       | AC099343.2 | 0.613689004 | 4.36E-57  | postive |
| FBXW7     | AC099343.2 | 0.486665359 | 2.13E-33  | postive |
| ZNF419    | SNHG21     | 0.491357901 | 4.18E-34  | postive |
| VEGFA     | SNHG21     | 0.400449242 | 3.54E-22  | postive |
| TUBE1     | SNHG21     | 0.425526856 | 4.08E-25  | postive |
| SETD1B    | SNHG21     | 0.402314498 | 2.18E-22  | postive |
| ALOX12    | SNHG21     | 0.488810194 | 1.02E-33  | postive |
| PHKG2     | SNHG21     | 0.522736997 | 3.96E-39  | postive |
| TAZ       | SNHG21     | 0.645247591 | 8.69E-65  | postive |
| TFAP2C    | LINC02803  | 0.531754669 | 1.13E-40  | postive |
| HBA1      | LINC02803  | 0.47806392  | 3.96E-32  | postive |
| KLHL24    | AP001021.3 | 0.563240275 | 1.93E-46  | postive |
| IREB2     | AP001021.3 | 0.413671635 | 1.07E-23  | postive |
| GABPB1    | AP001021.3 | 0.505528367 | 2.61E-36  | postive |
| PIK3CA    | AP001021.3 | 0.470826425 | 4.34E-31  | postive |
| KRAS      | AP001021.3 | 0.404869554 | 1.12E-22  | postive |
| LINC00472 | AP001021.3 | 0.949043562 | 1.82E-271 | postive |
| ATM       | AP001021.3 | 0.56140439  | 4.35E-46  | postive |
| HELLS     | AC025178.1 | 0.549662951 | 7.05E-44  | postive |
| ZNF419    | AC025178.1 | 0.45989107  | 1.45E-29  | postive |
| TUBE1     | AC025178.1 | 0.573553848 | 1.81E-48  | postive |
| ALOX12    | AC025178.1 | 0.554875278 | 7.56E-45  | postive |
| GABPB1    | AC025178.1 | 0.513468432 | 1.37E-37  | postive |
| LINC00472 | AC025178.1 | 0.484843721 | 3.99E-33  | postive |
| ATM       | AC025178.1 | 0.694384008 | 8.99E-79  | postive |
| FBXW7     | AC025178.1 | 0.537991663 | 9.11E-42  | postive |
| PROM2     | KLHDC7B-D1 | 0.650639826 | 3.40E-66  | postive |
| FANCD2    | AC010618.3 | 0.44761516  | 6.46E-28  | postive |
| HELLS     | AC010618.3 | 0.414644673 | 8.25E-24  | postive |
| ALOX12    | AC010618.3 | 0.467438467 | 1.31E-30  | postive |

|           |            |              |          |          |
|-----------|------------|--------------|----------|----------|
| TFAP2C    | AC010618.3 | 0.535536122  | 2.47E-41 | postive  |
| HBA1      | AC010618.3 | 0.459989632  | 1.41E-29 | postive  |
| DUOX1     | AC010618.3 | 0.439142662  | 8.10E-27 | postive  |
| ZNF419    | AC009087.1 | 0.463539739  | 4.57E-30 | postive  |
| TUBE1     | AC009087.1 | 0.529802853  | 2.47E-40 | postive  |
| ALOX12    | AC009087.1 | 0.476090033  | 7.65E-32 | postive  |
| GABPB1    | AC009087.1 | 0.429989861  | 1.15E-25 | postive  |
| LINC00472 | AC009087.1 | 0.689181041  | 3.69E-77 | postive  |
| ATM       | AC009087.1 | 0.444832749  | 1.49E-27 | postive  |
| OTUB1     | AL022328.4 | 0.406442092  | 7.40E-23 | postive  |
| PHKG2     | AL022328.4 | 0.545554909  | 3.99E-43 | postive  |
| ATG4D     | AL022328.4 | 0.41863291   | 2.77E-24 | postive  |
| TAZ       | AL022328.4 | 0.557571591  | 2.34E-45 | postive  |
| ALOX12B   | LINC01816  | 0.454180637  | 8.65E-29 | postive  |
| ZNF419    | LINC01535  | 0.434553304  | 3.10E-26 | postive  |
| KLHL24    | LINC01535  | 0.414912399  | 7.67E-24 | postive  |
| LINC00472 | LINC01535  | 0.618316439  | 3.67E-58 | postive  |
| LPIN1     | LINC01535  | 0.509280002  | 6.55E-37 | postive  |
| TFAP2C    | AC018450.1 | 0.429153245  | 1.46E-25 | postive  |
| ALOX12    | AC007098.1 | 0.514987904  | 7.71E-38 | postive  |
| TFAP2C    | AC007098.1 | 0.416972376  | 4.37E-24 | postive  |
| HBA1      | AC007098.1 | 0.412165126  | 1.61E-23 | postive  |
| ZNF419    | LINC01534  | 0.495404275  | 1.01E-34 | postive  |
| VEGFA     | LINC01534  | 0.457777005  | 2.82E-29 | postive  |
| TUBE1     | LINC01534  | 0.564934089  | 9.06E-47 | postive  |
| ALOX12    | LINC01534  | 0.695567399  | 3.82E-79 | postive  |
| GABPB1    | LINC01534  | 0.434812971  | 2.87E-26 | postive  |
| MAPK8     | LINC01534  | 0.461220047  | 9.55E-30 | postive  |
| ATM       | LINC01534  | 0.7225607    | 3.81E-88 | postive  |
| YY1AP1    | LINC01534  | 0.41897128   | 2.53E-24 | postive  |
| FBXW7     | LINC01534  | 0.414879967  | 7.74E-24 | postive  |
| PML       | WASL-DT    | -0.424145492 | 6.01E-25 | negative |
| TMBIM4    | WASL-DT    | 0.460179066  | 1.33E-29 | postive  |
| CHMP5     | WASL-DT    | 0.544016756  | 7.59E-43 | postive  |
| ATG5      | WASL-DT    | 0.469474133  | 6.75E-31 | postive  |
| GABARAPL2 | WASL-DT    | 0.498513294  | 3.32E-35 | postive  |
| HELLS     | AC138956.1 | 0.400486739  | 3.51E-22 | postive  |
| ZNF419    | AC138956.1 | 0.490433522  | 5.77E-34 | postive  |
| TUBE1     | AC138956.1 | 0.535303399  | 2.72E-41 | postive  |
| ALOX12    | AC138956.1 | 0.577081195  | 3.53E-49 | postive  |
| GABPB1    | AC138956.1 | 0.436022175  | 2.02E-26 | postive  |
| LINC00472 | AC138956.1 | 0.532237855  | 9.34E-41 | postive  |
| ATM       | AC138956.1 | 0.575117801  | 8.79E-49 | postive  |
| FBXW7     | AC138956.1 | 0.434669551  | 2.99E-26 | postive  |
| HELLS     | AC005253.1 | 0.432461627  | 5.67E-26 | postive  |
| BRD4      | AC005253.1 | 0.465452369  | 2.48E-30 | postive  |
| ZNF419    | AC005253.1 | 0.560843263  | 5.58E-46 | postive  |
| VEGFA     | AC005253.1 | 0.523036469  | 3.52E-39 | postive  |
| TUBE1     | AC005253.1 | 0.616209108  | 1.14E-57 | postive  |
| SETD1B    | AC005253.1 | 0.530155198  | 2.15E-40 | postive  |
| ALOX12    | AC005253.1 | 0.747318575  | 2.14E-97 | postive  |
| GABPB1    | AC005253.1 | 0.428396699  | 1.81E-25 | postive  |
| ATM       | AC005253.1 | 0.533938363  | 4.72E-41 | postive  |
| YY1AP1    | AC005253.1 | 0.42520814   | 4.46E-25 | postive  |
| TAZ       | AC005253.1 | 0.52364267   | 2.78E-39 | postive  |
| FBXW7     | AC005253.1 | 0.428453637  | 1.78E-25 | postive  |
| CISD2     | LINC02027  | 0.471776329  | 3.18E-31 | postive  |
| SCP2      | LINC02027  | 0.459241114  | 1.78E-29 | postive  |

|           |            |              |           |          |
|-----------|------------|--------------|-----------|----------|
| SNX4      | LINC02027  | 0.537124396  | 1.30E-41  | postive  |
| MAPK1     | LINC02027  | 0.442294844  | 3.19E-27  | postive  |
| PRKAA2    | LINC02027  | 0.47637814   | 6.95E-32  | postive  |
| HSPB1     | AC015912.3 | 0.419013824  | 2.50E-24  | postive  |
| HSF1      | AC015912.3 | 0.421151423  | 1.38E-24  | postive  |
| HRAS      | AC015912.3 | 0.454464525  | 7.92E-29  | postive  |
| NCOA4     | AC015912.3 | -0.443850441 | 2.00E-27  | negative |
| PHKG2     | AC015912.3 | 0.554770211  | 7.91E-45  | postive  |
| TAZ       | AC015912.3 | 0.607008968  | 1.44E-55  | postive  |
| HELLS     | AC005162.2 | 0.507784261  | 1.14E-36  | postive  |
| ZNF419    | AC005162.2 | 0.405336184  | 9.90E-23  | postive  |
| TUBE1     | AC005162.2 | 0.539671253  | 4.58E-42  | postive  |
| ALOX12    | AC005162.2 | 0.549609629  | 7.21E-44  | postive  |
| GABPB1    | AC005162.2 | 0.524927587  | 1.69E-39  | postive  |
| MAPK8     | AC005162.2 | 0.445784639  | 1.12E-27  | postive  |
| LINC00472 | AC005162.2 | 0.425315542  | 4.33E-25  | postive  |
| ATM       | AC005162.2 | 0.652283811  | 1.25E-66  | postive  |
| FBXW7     | AC005162.2 | 0.470853132  | 4.30E-31  | postive  |
| ACSL3     | SNRK-AS1   | 0.422926444  | 8.45E-25  | postive  |
| KLHL24    | SNRK-AS1   | 0.554726175  | 8.06E-45  | postive  |
| GABARAPL1 | SNRK-AS1   | 0.520729414  | 8.61E-39  | postive  |
| LINC00472 | SNRK-AS1   | 0.711140376  | 3.28E-84  | postive  |
| LPIN1     | SNRK-AS1   | 0.633783119  | 6.92E-62  | postive  |
| HELLS     | BACH1-IT1  | 0.589948214  | 7.64E-52  | postive  |
| TUBE1     | BACH1-IT1  | 0.464942599  | 2.92E-30  | postive  |
| ALOX12    | BACH1-IT1  | 0.471289081  | 3.73E-31  | postive  |
| GABPB1    | BACH1-IT1  | 0.563064539  | 2.09E-46  | postive  |
| ATG7      | BACH1-IT1  | 0.449915367  | 3.21E-28  | postive  |
| LINC00472 | BACH1-IT1  | 0.574418643  | 1.21E-48  | postive  |
| ATM       | BACH1-IT1  | 0.726635282  | 1.34E-89  | postive  |
| FBXW7     | BACH1-IT1  | 0.517613564  | 2.84E-38  | postive  |
| HELLS     | AC000123.1 | 0.516948244  | 3.66E-38  | postive  |
| ZNF419    | AC000123.1 | 0.426641634  | 2.98E-25  | postive  |
| TUBE1     | AC000123.1 | 0.506321425  | 1.95E-36  | postive  |
| ALOX12    | AC000123.1 | 0.440177231  | 5.97E-27  | postive  |
| GABPB1    | AC000123.1 | 0.578728119  | 1.63E-49  | postive  |
| LINC00472 | AC000123.1 | 0.627745723  | 2.09E-60  | postive  |
| ATM       | AC000123.1 | 0.598425999  | 1.15E-53  | postive  |
| FBXW7     | AC000123.1 | 0.516283316  | 4.72E-38  | postive  |
| SP1       | HCG15      | 0.446858383  | 8.12E-28  | postive  |
| SIRT1     | HCG15      | 0.413975325  | 9.89E-24  | postive  |
| KLHL24    | AC012467.1 | 0.426341832  | 3.24E-25  | postive  |
| LINC00472 | AC012467.1 | 0.766616755  | 2.17E-105 | postive  |
| ATM       | AC012467.1 | 0.437558564  | 1.29E-26  | postive  |
| ZNF419    | FLJ37453   | 0.427573687  | 2.29E-25  | postive  |
| ALOX12    | FLJ37453   | 0.428312956  | 1.86E-25  | postive  |
| TAZ       | FLJ37453   | 0.444283215  | 1.76E-27  | postive  |
| HBA1      | LINC00853  | 0.408324812  | 4.50E-23  | postive  |
| ALOX12B   | LINC00853  | 0.400402698  | 3.58E-22  | postive  |
| FH        | AC008966.1 | 0.40105925   | 3.02E-22  | postive  |
| SP1       | LINC01428  | 0.451526159  | 1.96E-28  | postive  |
| PRKAA2    | LINC01428  | 0.443933641  | 1.95E-27  | postive  |
| ATM       | LINC01428  | 0.531126643  | 1.46E-40  | postive  |
| HELLS     | AC010201.2 | 0.419822743  | 2.00E-24  | postive  |
| ZNF419    | AC010201.2 | 0.579261933  | 1.27E-49  | postive  |
| VEGFA     | AC010201.2 | 0.458854322  | 2.01E-29  | postive  |
| TUBE1     | AC010201.2 | 0.628873219  | 1.11E-60  | postive  |
| SETD1B    | AC010201.2 | 0.407025545  | 6.34E-23  | postive  |

|           |            |             |           |         |
|-----------|------------|-------------|-----------|---------|
| ALOX12    | AC010201.2 | 0.71273969  | 9.47E-85  | postive |
| GABPB1    | AC010201.2 | 0.499710942 | 2.16E-35  | postive |
| LINC00472 | AC010201.2 | 0.45178334  | 1.81E-28  | postive |
| ATM       | AC010201.2 | 0.587655752 | 2.33E-51  | postive |
| TAZ       | AC010201.2 | 0.490734214 | 5.20E-34  | postive |
| FBXW7     | AC010201.2 | 0.427109381 | 2.61E-25  | postive |
| FANCD2    | AC074117.1 | 0.417499417 | 3.79E-24  | postive |
| BRD4      | AC074117.1 | 0.456773029 | 3.87E-29  | postive |
| ZNF419    | AC074117.1 | 0.480204086 | 1.93E-32  | postive |
| TUBE1     | AC074117.1 | 0.513231792 | 1.50E-37  | postive |
| SETD1B    | AC074117.1 | 0.446217329 | 9.85E-28  | postive |
| DRD4      | AC074117.1 | 0.442146454 | 3.33E-27  | postive |
| ALOX12    | AC074117.1 | 0.612997603 | 6.29E-57  | postive |
| PHKG2     | AC074117.1 | 0.564717355 | 9.99E-47  | postive |
| TAZ       | AC074117.1 | 0.651082697 | 2.59E-66  | postive |
| TFAP2C    | PPP1R35-AS | 0.491625906 | 3.81E-34  | postive |
| HBA1      | PPP1R35-AS | 0.530273802 | 2.05E-40  | postive |
| HELLS     | AC013468.1 | 0.535779658 | 2.24E-41  | postive |
| ZNF419    | AC013468.1 | 0.444992557 | 1.42E-27  | postive |
| TUBE1     | AC013468.1 | 0.613940538 | 3.82E-57  | postive |
| ALOX12    | AC013468.1 | 0.608574556 | 6.41E-56  | postive |
| GABPB1    | AC013468.1 | 0.493636159 | 1.88E-34  | postive |
| ATM       | AC013468.1 | 0.566698832 | 4.11E-47  | postive |
| FBXW7     | AC013468.1 | 0.483132515 | 7.15E-33  | postive |
| GCH1      | AC243829.4 | 0.522738685 | 3.96E-39  | postive |
| IFNG      | AC243829.4 | 0.678040074 | 8.11E-74  | postive |
| TRIB3     | AC010894.1 | 0.426174989 | 3.40E-25  | postive |
| VEGFA     | AC022144.1 | 0.473519896 | 1.79E-31  | postive |
| TUBE1     | AC022144.1 | 0.423595297 | 7.01E-25  | postive |
| DRD4      | AC022144.1 | 0.409150997 | 3.61E-23  | postive |
| ALOX12    | AC022144.1 | 0.546813093 | 2.35E-43  | postive |
| PHKG2     | AC022144.1 | 0.413907494 | 1.01E-23  | postive |
| TAZ       | AC022144.1 | 0.609463362 | 4.03E-56  | postive |
| HELLS     | LINC00630  | 0.567612399 | 2.72E-47  | postive |
| MTOR      | LINC00630  | 0.515585964 | 6.15E-38  | postive |
| ACSL3     | LINC00630  | 0.426332818 | 3.25E-25  | postive |
| ZNF419    | LINC00630  | 0.406506642 | 7.28E-23  | postive |
| KLHL24    | LINC00630  | 0.595623368 | 4.67E-53  | postive |
| TUBE1     | LINC00630  | 0.422038857 | 1.08E-24  | postive |
| MAP3K5    | LINC00630  | 0.448975674 | 4.27E-28  | postive |
| EIF2AK4   | LINC00630  | 0.428538991 | 1.74E-25  | postive |
| IREB2     | LINC00630  | 0.61046598  | 2.39E-56  | postive |
| GABPB1    | LINC00630  | 0.598632211 | 1.04E-53  | postive |
| PIK3CA    | LINC00630  | 0.581379086 | 4.69E-50  | postive |
| KRAS      | LINC00630  | 0.418675336 | 2.74E-24  | postive |
| ATG7      | LINC00630  | 0.520253933 | 1.03E-38  | postive |
| MAPK8     | LINC00630  | 0.528516125 | 4.11E-40  | postive |
| LINC00472 | LINC00630  | 0.689548028 | 2.85E-77  | postive |
| PRKAA2    | LINC00630  | 0.46407189  | 3.85E-30  | postive |
| PRKAA1    | LINC00630  | 0.499437327 | 2.38E-35  | postive |
| TGFBR1    | LINC00630  | 0.443800266 | 2.03E-27  | postive |
| LPIN1     | LINC00630  | 0.429809568 | 1.21E-25  | postive |
| TLR4      | LINC00630  | 0.411135793 | 2.12E-23  | postive |
| ATM       | LINC00630  | 0.767534481 | 8.64E-106 | postive |
| FBXW7     | LINC00630  | 0.575453829 | 7.52E-49  | postive |
| BACH1     | LINC00630  | 0.446745026 | 8.40E-28  | postive |
| ZFP36     | MIR23AHG   | 0.563787111 | 1.51E-46  | postive |
| ATF3      | MIR23AHG   | 0.520513189 | 9.36E-39  | postive |

|           |            |              |           |          |
|-----------|------------|--------------|-----------|----------|
| VEGFA     | MIR23AHG   | 0.438784151  | 9.00E-27  | postive  |
| TUBE1     | LINC02604  | 0.431280599  | 7.96E-26  | postive  |
| DRD4      | LINC02604  | 0.47099769   | 4.10E-31  | postive  |
| ALOX12    | LINC02604  | 0.467840263  | 1.15E-30  | postive  |
| NCOA4     | LINC02604  | -0.467838011 | 1.15E-30  | negative |
| PHKG2     | LINC02604  | 0.678531461  | 5.81E-74  | postive  |
| TAZ       | LINC02604  | 0.767639622  | 7.78E-106 | postive  |
| ALOX12    | AC010519.1 | 0.417593075  | 3.69E-24  | postive  |
| TFAP2C    | AC010519.1 | 0.496814559  | 6.09E-35  | postive  |
| HBA1      | AC010519.1 | 0.582794395  | 2.39E-50  | postive  |
| FANCD2    | AC074029.3 | 0.437266375  | 1.41E-26  | postive  |
| HELLS     | AC074029.3 | 0.455079196  | 6.55E-29  | postive  |
| ALOX12    | AC074029.3 | 0.593565414  | 1.29E-52  | postive  |
| TFAP2C    | AC074029.3 | 0.429976161  | 1.16E-25  | postive  |
| DUOX1     | AC074029.3 | 0.433545267  | 4.15E-26  | postive  |
| PHKG2     | CACNA1C-A  | 0.527646786  | 5.80E-40  | postive  |
| TAZ       | CACNA1C-A  | 0.561642655  | 3.92E-46  | postive  |
| TFAP2C    | LINC02585  | 0.578137707  | 2.15E-49  | postive  |
| HBA1      | LINC02585  | 0.509940376  | 5.12E-37  | postive  |
| DUOX1     | LINC02585  | 0.414476998  | 8.63E-24  | postive  |
| FANCD2    | AC010463.3 | 0.473721252  | 1.68E-31  | postive  |
| HELLS     | AC010463.3 | 0.459771995  | 1.51E-29  | postive  |
| ZNF419    | AC010463.3 | 0.453028044  | 1.24E-28  | postive  |
| ALOX12    | AC010463.3 | 0.538383864  | 7.76E-42  | postive  |
| TFAP2C    | AC010463.3 | 0.434712499  | 2.96E-26  | postive  |
| DUOX1     | AC010463.3 | 0.417994281  | 3.31E-24  | postive  |
| ALOX12    | AL353801.1 | 0.418811051  | 2.64E-24  | postive  |
| ATM       | AL353801.1 | 0.480499698  | 1.75E-32  | postive  |
| VEGFA     | MATN1-AS1  | 0.42578491   | 3.79E-25  | postive  |
| ALOX12    | MATN1-AS1  | 0.406701726  | 6.91E-23  | postive  |
| PHKG2     | MATN1-AS1  | 0.435144549  | 2.61E-26  | postive  |
| TAZ       | MATN1-AS1  | 0.609442226  | 4.08E-56  | postive  |
| KLHL24    | AC098869.2 | 0.534678045  | 3.50E-41  | postive  |
| TUBE1     | AC098869.2 | 0.473945433  | 1.56E-31  | postive  |
| ALOX12    | AC098869.2 | 0.427526247  | 2.32E-25  | postive  |
| IREB2     | AC098869.2 | 0.407909483  | 5.02E-23  | postive  |
| GABPB1    | AC098869.2 | 0.492617205  | 2.69E-34  | postive  |
| PIK3CA    | AC098869.2 | 0.410353209  | 2.62E-23  | postive  |
| LINC00472 | AC098869.2 | 0.873328862  | 7.26E-170 | postive  |
| ATM       | AC098869.2 | 0.594150786  | 9.69E-53  | postive  |
| FBXW7     | AC098869.2 | 0.408945919  | 3.81E-23  | postive  |
| IREB2     | AP000897.2 | 0.402391916  | 2.14E-22  | postive  |
| GABPB1    | AP000897.2 | 0.438618626  | 9.45E-27  | postive  |
| ATG7      | AP000897.2 | 0.433068239  | 4.76E-26  | postive  |
| LINC00472 | AP000897.2 | 0.418857519  | 2.61E-24  | postive  |
| PRKAA2    | AP000897.2 | 0.40960273   | 3.20E-23  | postive  |
| ATM       | AP000897.2 | 0.653336361  | 6.54E-67  | postive  |
| FBXW7     | AP000897.2 | 0.424372301  | 5.64E-25  | postive  |
| EGFR      | EGFR-AS1   | 0.542985213  | 1.17E-42  | postive  |
| FANCD2    | NDUFB2-AS1 | 0.418415969  | 2.95E-24  | postive  |
| TFAP2C    | NDUFB2-AS1 | 0.570593912  | 7.03E-48  | postive  |
| HBA1      | NDUFB2-AS1 | 0.497984534  | 4.01E-35  | postive  |
| TUBE1     | VIM-AS1    | 0.431913358  | 6.64E-26  | postive  |
| GABPB1    | AL357140.2 | 0.443001557  | 2.58E-27  | postive  |
| MAPK8     | AL357140.2 | 0.453587784  | 1.04E-28  | postive  |
| LINC00472 | AL357140.2 | 0.403261083  | 1.71E-22  | postive  |
| PRKAA2    | AL357140.2 | 0.456387354  | 4.36E-29  | postive  |
| ATM       | AL357140.2 | 0.629515983  | 7.74E-61  | postive  |

|           |            |             |           |         |
|-----------|------------|-------------|-----------|---------|
| FBXW7     | AL357140.2 | 0.422710521 | 8.98E-25  | postive |
| FANCD2    | AC011921.1 | 0.431303156 | 7.91E-26  | postive |
| HELLS     | AC011921.1 | 0.473086822 | 2.07E-31  | postive |
| ALOX12    | AC011921.1 | 0.52716383  | 7.01E-40  | postive |
| ZNF419    | AC024361.3 | 0.56005929  | 7.88E-46  | postive |
| VEGFA     | AC024361.3 | 0.510410461 | 4.30E-37  | postive |
| TUBE1     | AC024361.3 | 0.590969513 | 4.64E-52  | postive |
| SETD1B    | AC024361.3 | 0.474056103 | 1.50E-31  | postive |
| ALOX12    | AC024361.3 | 0.698779182 | 3.66E-80  | postive |
| ATM       | AC024361.3 | 0.455991758 | 4.93E-29  | postive |
| TAZ       | AC024361.3 | 0.549657991 | 7.07E-44  | postive |
| FBXW7     | AC024361.3 | 0.404804619 | 1.14E-22  | postive |
| HELLS     | AC018410.1 | 0.552928163 | 1.75E-44  | postive |
| TUBE1     | AC018410.1 | 0.474204451 | 1.43E-31  | postive |
| ALOX12    | AC018410.1 | 0.501266307 | 1.23E-35  | postive |
| GABPB1    | AC018410.1 | 0.555982905 | 4.68E-45  | postive |
| ATG7      | AC018410.1 | 0.454255067 | 8.46E-29  | postive |
| LINC00472 | AC018410.1 | 0.687799443 | 9.76E-77  | postive |
| ATM       | AC018410.1 | 0.737322989 | 1.55E-93  | postive |
| FBXW7     | AC018410.1 | 0.486305483 | 2.41E-33  | postive |
| HSPB1     | MAFG-DT    | 0.49373336  | 1.82E-34  | postive |
| G6PD      | MAFG-DT    | 0.46261311  | 6.14E-30  | postive |
| HELLS     | CLDN10-AS1 | 0.501645131 | 1.08E-35  | postive |
| TUBE1     | CLDN10-AS1 | 0.435272261 | 2.51E-26  | postive |
| GABPB1    | CLDN10-AS1 | 0.516917852 | 3.71E-38  | postive |
| ATG7      | CLDN10-AS1 | 0.456811913 | 3.82E-29  | postive |
| LINC00472 | CLDN10-AS1 | 0.65224625  | 1.28E-66  | postive |
| ATM       | CLDN10-AS1 | 0.670382638 | 1.32E-71  | postive |
| FBXW7     | CLDN10-AS1 | 0.429044293 | 1.51E-25  | postive |
| KLHL24    | MIR99AHG   | 0.54336185  | 9.97E-43  | postive |
| TUBE1     | MIR99AHG   | 0.429537759 | 1.31E-25  | postive |
| IREB2     | MIR99AHG   | 0.474171    | 1.45E-31  | postive |
| GABPB1    | MIR99AHG   | 0.559475145 | 1.02E-45  | postive |
| PIK3CA    | MIR99AHG   | 0.502610414 | 7.58E-36  | postive |
| KRAS      | MIR99AHG   | 0.404281832 | 1.31E-22  | postive |
| MAPK8     | MIR99AHG   | 0.462788937 | 5.80E-30  | postive |
| LINC00472 | MIR99AHG   | 0.797556192 | 5.75E-120 | postive |
| PRKAA1    | MIR99AHG   | 0.435592262 | 2.29E-26  | postive |
| LPIN1     | MIR99AHG   | 0.430628221 | 9.59E-26  | postive |
| ATM       | MIR99AHG   | 0.568943276 | 1.49E-47  | postive |
| FBXW7     | MIR99AHG   | 0.417120884 | 4.20E-24  | postive |
| FANCD2    | ATP2B1-AS1 | 0.415121525 | 7.24E-24  | postive |
| TFAP2C    | ATP2B1-AS1 | 0.51260897  | 1.89E-37  | postive |
| HBA1      | ATP2B1-AS1 | 0.426314232 | 3.27E-25  | postive |
| ZNF419    | AC104564.3 | 0.517280778 | 3.23E-38  | postive |
| VEGFA     | AC104564.3 | 0.449366404 | 3.79E-28  | postive |
| TUBE1     | AC104564.3 | 0.543175359 | 1.08E-42  | postive |
| SETD1B    | AC104564.3 | 0.503495564 | 5.49E-36  | postive |
| ALOX12    | AC104564.3 | 0.711886366 | 1.84E-84  | postive |
| PHKG2     | AC104564.3 | 0.418937061 | 2.55E-24  | postive |
| TAZ       | AC104564.3 | 0.566377168 | 4.74E-47  | postive |
| ZNF419    | AC135050.3 | 0.425945985 | 3.63E-25  | postive |
| TUBE1     | AC135050.3 | 0.474301842 | 1.38E-31  | postive |
| DRD4      | AC135050.3 | 0.460650636 | 1.14E-29  | postive |
| ALOX12    | AC135050.3 | 0.554206276 | 1.01E-44  | postive |
| PHKG2     | AC135050.3 | 0.60074636  | 3.57E-54  | postive |
| TAZ       | AC135050.3 | 0.716911237 | 3.56E-86  | postive |
| HELLS     | AC089999.2 | 0.540877088 | 2.79E-42  | postive |

|           |            |             |          |         |
|-----------|------------|-------------|----------|---------|
| ZNF419    | AC089999.2 | 0.44415819  | 1.83E-27 | postive |
| ALOX12    | AC089999.2 | 0.433828732 | 3.82E-26 | postive |
| GABPB1    | AC089999.2 | 0.468153517 | 1.04E-30 | postive |
| LINC00472 | AC089999.2 | 0.618265165 | 3.78E-58 | postive |
| ATM       | AC089999.2 | 0.493845489 | 1.74E-34 | postive |
| FBXW7     | AC089999.2 | 0.425797129 | 3.78E-25 | postive |
| HELLS     | AL157871.2 | 0.500711288 | 1.51E-35 | postive |
| TUBE1     | AL157871.2 | 0.438830686 | 8.88E-27 | postive |
| ALOX12    | AL157871.2 | 0.537509185 | 1.11E-41 | postive |
| GABPB1    | AL157871.2 | 0.42318204  | 7.87E-25 | postive |
| ATM       | AL157871.2 | 0.502521599 | 7.83E-36 | postive |
| FBXW7     | AL157871.2 | 0.486513687 | 2.25E-33 | postive |
| SLC1A4    | AC007406.3 | 0.455807418 | 5.22E-29 | postive |
| ZEB1      | AC007406.3 | 0.561663523 | 3.88E-46 | postive |
| EPAS1     | AC007406.3 | 0.481973804 | 1.06E-32 | postive |
| HELLS     | AC046158.1 | 0.558512769 | 1.55E-45 | postive |
| TUBE1     | AC046158.1 | 0.421462405 | 1.27E-24 | postive |
| ALOX12    | AC046158.1 | 0.452200445 | 1.59E-28 | postive |
| GABPB1    | AC046158.1 | 0.513471672 | 1.37E-37 | postive |
| ATG7      | AC046158.1 | 0.412185911 | 1.60E-23 | postive |
| MAPK8     | AC046158.1 | 0.41399885  | 9.82E-24 | postive |
| LINC00472 | AC046158.1 | 0.637818768 | 6.81E-63 | postive |
| ATM       | AC046158.1 | 0.703489335 | 1.11E-81 | postive |
| FBXW7     | AC046158.1 | 0.454042875 | 9.03E-29 | postive |
| HELLS     | ACBD3-AS1  | 0.593424593 | 1.39E-52 | postive |
| ZNF419    | ACBD3-AS1  | 0.432953039 | 4.92E-26 | postive |
| TUBE1     | ACBD3-AS1  | 0.533347548 | 5.98E-41 | postive |
| ALOX12    | ACBD3-AS1  | 0.583442941 | 1.76E-50 | postive |
| GABPB1    | ACBD3-AS1  | 0.56188061  | 3.53E-46 | postive |
| LINC00472 | ACBD3-AS1  | 0.595154364 | 5.89E-53 | postive |
| ATM       | ACBD3-AS1  | 0.708693608 | 2.16E-83 | postive |
| FBXW7     | ACBD3-AS1  | 0.523205334 | 3.30E-39 | postive |
| HELLS     | AC008735.4 | 0.42237012  | 9.87E-25 | postive |
| BRD4      | AC008735.4 | 0.459535609 | 1.63E-29 | postive |
| ZNF419    | AC008735.4 | 0.618179647 | 3.96E-58 | postive |
| TUBE1     | AC008735.4 | 0.557289988 | 2.65E-45 | postive |
| SETD1B    | AC008735.4 | 0.561491583 | 4.19E-46 | postive |
| ALOX12    | AC008735.4 | 0.611633715 | 1.29E-56 | postive |
| GABPB1    | AC008735.4 | 0.46358447  | 4.50E-30 | postive |
| LINC00472 | AC008735.4 | 0.408243354 | 4.60E-23 | postive |
| ATM       | AC008735.4 | 0.481288018 | 1.34E-32 | postive |
| TAZ       | AC008735.4 | 0.492583828 | 2.72E-34 | postive |
| FBXW7     | AC008735.4 | 0.439558852 | 7.17E-27 | postive |
| TFAP2C    | TOB1-AS1   | 0.492749561 | 2.57E-34 | postive |
| HBA1      | TOB1-AS1   | 0.442915679 | 2.65E-27 | postive |
| BRD4      | AL928654.2 | 0.470386397 | 5.01E-31 | postive |
| ZNF419    | AL928654.2 | 0.662857417 | 1.71E-69 | postive |
| VEGFA     | AL928654.2 | 0.595133597 | 5.96E-53 | postive |
| TUBE1     | AL928654.2 | 0.560235827 | 7.29E-46 | postive |
| SETD1B    | AL928654.2 | 0.530968842 | 1.55E-40 | postive |
| DRD4      | AL928654.2 | 0.415186805 | 7.12E-24 | postive |
| ALOX12    | AL928654.2 | 0.662051618 | 2.85E-69 | postive |
| TAZ       | AL928654.2 | 0.594830112 | 6.92E-53 | postive |
| FBXW7     | AL928654.2 | 0.408019828 | 4.88E-23 | postive |
| PTGS2     | LIMS1-AS1  | 0.495383788 | 1.01E-34 | postive |
| IL6       | LIMS1-AS1  | 0.448985585 | 4.26E-28 | postive |
| LINC00472 | LIMS1-AS1  | 0.592024737 | 2.76E-52 | postive |
| ATM       | LIMS1-AS1  | 0.460671353 | 1.14E-29 | postive |



|           |            |             |          |         |
|-----------|------------|-------------|----------|---------|
| CISD1     | AC103760.1 | 0.410259847 | 2.69E-23 | postive |
| TFAP2C    | AL139289.1 | 0.56218752  | 3.08E-46 | postive |
| PHKG2     | AC026333.4 | 0.582898018 | 2.28E-50 | postive |
| TAZ       | AC026333.4 | 0.601504053 | 2.43E-54 | postive |
| ZNF419    | AP001458.1 | 0.444018973 | 1.91E-27 | postive |
| TUBE1     | AP001458.1 | 0.455996153 | 4.93E-29 | postive |
| SETD1B    | AP001458.1 | 0.405546129 | 9.37E-23 | postive |
| ALOX12    | AP001458.1 | 0.574376676 | 1.24E-48 | postive |
| GABPB1    | AP001458.1 | 0.418449244 | 2.92E-24 | postive |
| ATM       | AP001458.1 | 0.422343857 | 9.94E-25 | postive |
| FBXW7     | AP001458.1 | 0.42814604  | 1.95E-25 | postive |
| TFAP2C    | AC018521.5 | 0.497894793 | 4.14E-35 | postive |
| HBA1      | AC018521.5 | 0.489712263 | 7.42E-34 | postive |
| TAZ       | LINC01474  | 0.442285135 | 3.20E-27 | postive |
| G6PD      | AP000525.1 | 0.4302365   | 1.07E-25 | postive |
| TFR2      | LINC01606  | 0.445630956 | 1.17E-27 | postive |
| IDH1      | LINC01606  | 0.506911222 | 1.57E-36 | postive |
| ISCU      | AC007342.5 | 0.457316225 | 3.26E-29 | postive |
| KLHL24    | AC007342.5 | 0.540260227 | 3.60E-42 | postive |
| GABARAPL1 | AC007342.5 | 0.541431166 | 2.22E-42 | postive |
| LINC00472 | AC007342.5 | 0.654854094 | 2.57E-67 | postive |
| LPIN1     | AC007342.5 | 0.550693193 | 4.55E-44 | postive |
| TFAP2C    | AC008543.3 | 0.575934622 | 6.02E-49 | postive |
| HBA1      | AC008543.3 | 0.515928773 | 5.40E-38 | postive |
| DUOX1     | AC008543.3 | 0.420194892 | 1.80E-24 | postive |
| HELLS     | AC002553.1 | 0.491160127 | 4.48E-34 | postive |
| ZNF419    | AC002553.1 | 0.544096099 | 7.34E-43 | postive |
| VEGFA     | AC002553.1 | 0.422852706 | 8.63E-25 | postive |
| TUBE1     | AC002553.1 | 0.676065575 | 3.06E-73 | postive |
| SETD1B    | AC002553.1 | 0.417439368 | 3.85E-24 | postive |
| ALOX12    | AC002553.1 | 0.703688099 | 9.58E-82 | postive |
| GABPB1    | AC002553.1 | 0.503355683 | 5.78E-36 | postive |
| LINC00472 | AC002553.1 | 0.485064527 | 3.70E-33 | postive |
| ATM       | AC002553.1 | 0.595297656 | 5.49E-53 | postive |
| TAZ       | AC002553.1 | 0.504671331 | 3.58E-36 | postive |
| FBXW7     | AC002553.1 | 0.492577514 | 2.73E-34 | postive |
| ASNS      | AC004825.2 | 0.402544033 | 2.06E-22 | postive |
| JDP2      | AC004825.2 | 0.601126897 | 2.94E-54 | postive |
| RGS4      | AC004825.2 | 0.454058861 | 8.98E-29 | postive |
| EIF2S1    | AC004825.2 | 0.472868958 | 2.22E-31 | postive |
| CARS1     | AC004825.2 | 0.407362956 | 5.80E-23 | postive |
| HELLS     | LINC01355  | 0.485317569 | 3.39E-33 | postive |
| ZNF419    | LINC01355  | 0.576813294 | 4.00E-49 | postive |
| TUBE1     | LINC01355  | 0.605198388 | 3.68E-55 | postive |
| ALOX12    | LINC01355  | 0.581605935 | 4.21E-50 | postive |
| GABPB1    | LINC01355  | 0.521844619 | 5.60E-39 | postive |
| PHKG2     | LINC01355  | 0.465553581 | 2.40E-30 | postive |
| ATM       | LINC01355  | 0.527474773 | 6.20E-40 | postive |
| TAZ       | LINC01355  | 0.614099146 | 3.51E-57 | postive |
| FBXW7     | LINC01355  | 0.504364384 | 4.00E-36 | postive |
| HELLS     | AL355488.1 | 0.514096767 | 1.08E-37 | postive |
| ZNF419    | AL355488.1 | 0.554841141 | 7.67E-45 | postive |
| TUBE1     | AL355488.1 | 0.664681166 | 5.32E-70 | postive |
| ALOX12    | AL355488.1 | 0.617533893 | 5.60E-58 | postive |
| GABPB1    | AL355488.1 | 0.519614268 | 1.32E-38 | postive |
| PHKG2     | AL355488.1 | 0.480946605 | 1.50E-32 | postive |
| LINC00472 | AL355488.1 | 0.425044775 | 4.67E-25 | postive |
| ATM       | AL355488.1 | 0.55268872  | 1.94E-44 | postive |

|           |            |             |          |         |
|-----------|------------|-------------|----------|---------|
| TAZ       | AL355488.1 | 0.596402649 | 3.17E-53 | postive |
| FBXW7     | AL355488.1 | 0.4651154   | 2.76E-30 | postive |
| FANCD2    | AC011479.2 | 0.410407852 | 2.58E-23 | postive |
| ALOX12    | AC011479.2 | 0.546170913 | 3.08E-43 | postive |
| TFAP2C    | AC011479.2 | 0.413323194 | 1.18E-23 | postive |
| HSPB1     | AC087623.2 | 0.436563991 | 1.73E-26 | postive |
| HRAS      | AC087623.2 | 0.523980385 | 2.44E-39 | postive |
| PHKG2     | AC087623.2 | 0.438949784 | 8.58E-27 | postive |
| EGLN2     | AC087623.2 | 0.479592324 | 2.37E-32 | postive |
| TAZ       | AC087623.2 | 0.414714883 | 8.09E-24 | postive |
| HELLS     | AC027097.1 | 0.548527302 | 1.14E-43 | postive |
| ZNF419    | AC027097.1 | 0.417409549 | 3.88E-24 | postive |
| TUBE1     | AC027097.1 | 0.526183589 | 1.03E-39 | postive |
| ALOX12    | AC027097.1 | 0.546850598 | 2.32E-43 | postive |
| GABPB1    | AC027097.1 | 0.621582044 | 6.25E-59 | postive |
| MAPK8     | AC027097.1 | 0.489744509 | 7.34E-34 | postive |
| LINC00472 | AC027097.1 | 0.503629909 | 5.23E-36 | postive |
| ATM       | AC027097.1 | 0.68644188  | 2.53E-76 | postive |
| FBXW7     | AC027097.1 | 0.517778193 | 2.67E-38 | postive |
| ZNF419    | AL161669.3 | 0.425831035 | 3.74E-25 | postive |
| VEGFA     | AL161669.3 | 0.427990223 | 2.03E-25 | postive |
| TUBE1     | AL161669.3 | 0.427789403 | 2.15E-25 | postive |
| ALOX12    | AL161669.3 | 0.506081294 | 2.13E-36 | postive |
| PHKG2     | AL161669.3 | 0.476191613 | 7.39E-32 | postive |
| TAZ       | AL161669.3 | 0.677536553 | 1.14E-73 | postive |
| FANCD2    | AL355574.1 | 0.485194164 | 3.53E-33 | postive |
| HELLS     | AL355574.1 | 0.526269885 | 9.97E-40 | postive |
| ZNF419    | AL355574.1 | 0.47799846  | 4.05E-32 | postive |
| TUBE1     | AL355574.1 | 0.425813374 | 3.76E-25 | postive |
| SETD1B    | AL355574.1 | 0.421753378 | 1.17E-24 | postive |
| ALOX12    | AL355574.1 | 0.569228077 | 1.31E-47 | postive |
| GABPB1    | AL355574.1 | 0.452705033 | 1.36E-28 | postive |
| ATM       | AL355574.1 | 0.442232442 | 3.25E-27 | postive |
| YY1AP1    | AL355574.1 | 0.456188883 | 4.64E-29 | postive |
| HELLS     | AL157834.1 | 0.462077441 | 7.28E-30 | postive |
| GABPB1    | AL157834.1 | 0.434196062 | 3.43E-26 | postive |
| ATG7      | AL157834.1 | 0.402591724 | 2.03E-22 | postive |
| LINC00472 | AL157834.1 | 0.438747077 | 9.10E-27 | postive |
| ATM       | AL157834.1 | 0.629975428 | 5.98E-61 | postive |
| FBXW7     | AL157834.1 | 0.427204345 | 2.54E-25 | postive |
| ZNF419    | AC003070.1 | 0.525636122 | 1.28E-39 | postive |
| VEGFA     | AC003070.1 | 0.430255186 | 1.07E-25 | postive |
| TUBE1     | AC003070.1 | 0.602009213 | 1.88E-54 | postive |
| SETD1B    | AC003070.1 | 0.528050939 | 4.94E-40 | postive |
| ALOX12    | AC003070.1 | 0.68459304  | 9.15E-76 | postive |
| PHKG2     | AC003070.1 | 0.442783298 | 2.76E-27 | postive |
| ATM       | AC003070.1 | 0.44773002  | 6.24E-28 | postive |
| TAZ       | AC003070.1 | 0.596481363 | 3.04E-53 | postive |
| FBXW7     | AC003070.1 | 0.456039194 | 4.86E-29 | postive |
| FANCD2    | AC091180.4 | 0.412294957 | 1.56E-23 | postive |
| TFAP2C    | AC091180.4 | 0.557280815 | 2.66E-45 | postive |
| HBA1      | AC091180.4 | 0.505285786 | 2.86E-36 | postive |
| HSPB1     | AC007448.4 | 0.401263949 | 2.87E-22 | postive |
| TFAP2C    | AC007448.4 | 0.456886132 | 3.73E-29 | postive |
| HBA1      | AC007448.4 | 0.495193356 | 1.08E-34 | postive |
| ALOX12B   | AC007448.4 | 0.425828153 | 3.75E-25 | postive |
| PHKG2     | AL121601.1 | 0.406750915 | 6.82E-23 | postive |
| TAZ       | AL121601.1 | 0.511409385 | 2.96E-37 | postive |

|           |            |             |          |         |
|-----------|------------|-------------|----------|---------|
| HELLS     | CR936218.1 | 0.559201666 | 1.15E-45 | postive |
| ZNF419    | CR936218.1 | 0.485769027 | 2.90E-33 | postive |
| TUBE1     | CR936218.1 | 0.598596008 | 1.06E-53 | postive |
| ALOX12    | CR936218.1 | 0.648289548 | 1.41E-65 | postive |
| GABPB1    | CR936218.1 | 0.585165692 | 7.71E-51 | postive |
| MAPK8     | CR936218.1 | 0.435754835 | 2.18E-26 | postive |
| LINC00472 | CR936218.1 | 0.618807784 | 2.82E-58 | postive |
| ATM       | CR936218.1 | 0.739332781 | 2.69E-94 | postive |
| FBXW7     | CR936218.1 | 0.534131738 | 4.36E-41 | postive |
| FANCD2    | CHROMR     | 0.459049424 | 1.89E-29 | postive |
| HELLS     | CHROMR     | 0.598749656 | 9.78E-54 | postive |
| ZNF419    | CHROMR     | 0.546633704 | 2.54E-43 | postive |
| ZFP69B    | CHROMR     | 0.407304002 | 5.89E-23 | postive |
| TUBE1     | CHROMR     | 0.538355069 | 7.85E-42 | postive |
| ALOX12    | CHROMR     | 0.487323804 | 1.70E-33 | postive |
| GABPB1    | CHROMR     | 0.690367482 | 1.59E-77 | postive |
| ZEB1      | CHROMR     | 0.452016662 | 1.69E-28 | postive |
| MAPK8     | CHROMR     | 0.445101268 | 1.38E-27 | postive |
| ATM       | CHROMR     | 0.551170255 | 3.71E-44 | postive |
| FBXW7     | CHROMR     | 0.582412206 | 2.87E-50 | postive |
| CYBB      | LINC00900  | 0.421395705 | 1.29E-24 | postive |
| BACH1     | LINC00900  | 0.405865886 | 8.62E-23 | postive |
| TFAP2C    | RB1-DT     | 0.560546084 | 6.36E-46 | postive |
| HBA1      | RB1-DT     | 0.515311304 | 6.82E-38 | postive |
| DUOX1     | RB1-DT     | 0.405360437 | 9.84E-23 | postive |
| GOT1      | AC026992.2 | 0.404368121 | 1.28E-22 | postive |
| ZNF419    | AL391684.1 | 0.601046795 | 3.07E-54 | postive |
| TUBE1     | AL391684.1 | 0.611685687 | 1.26E-56 | postive |
| ALOX12    | AL391684.1 | 0.666350692 | 1.82E-70 | postive |
| GABPB1    | AL391684.1 | 0.421781812 | 1.16E-24 | postive |
| PHKG2     | AL391684.1 | 0.455954918 | 4.99E-29 | postive |
| ATM       | AL391684.1 | 0.432374576 | 5.81E-26 | postive |
| TAZ       | AL391684.1 | 0.577568    | 2.81E-49 | postive |
| HELLS     | AL138921.2 | 0.454670066 | 7.44E-29 | postive |
| ALOX12    | AL138921.2 | 0.486689576 | 2.11E-33 | postive |
| TFAP2C    | AL138921.2 | 0.416966399 | 4.38E-24 | postive |
| HBA1      | AL138921.2 | 0.442761823 | 2.77E-27 | postive |
| ATM       | AL138921.2 | 0.402576239 | 2.04E-22 | postive |
| FBXW7     | AL138921.2 | 0.436395967 | 1.81E-26 | postive |
| CA9       | PFKP-DT    | 0.444422604 | 1.69E-27 | postive |
| VEGFA     | PFKP-DT    | 0.500228852 | 1.79E-35 | postive |
| HELLS     | SLC16A12-A | 0.468880101 | 8.18E-31 | postive |
| TUBE1     | SLC16A12-A | 0.404641231 | 1.19E-22 | postive |
| ALOX12    | SLC16A12-A | 0.413505276 | 1.12E-23 | postive |
| IREB2     | SLC16A12-A | 0.408251461 | 4.59E-23 | postive |
| GABPB1    | SLC16A12-A | 0.478152678 | 3.84E-32 | postive |
| MAPK8     | SLC16A12-A | 0.434099243 | 3.53E-26 | postive |
| LINC00472 | SLC16A12-A | 0.573846871 | 1.58E-48 | postive |
| PRKAA2    | SLC16A12-A | 0.432909838 | 4.98E-26 | postive |
| ATM       | SLC16A12-A | 0.725786922 | 2.71E-89 | postive |
| FBXW7     | SLC16A12-A | 0.413488679 | 1.13E-23 | postive |
| LINC00472 | AC080013.3 | 0.460357294 | 1.25E-29 | postive |
| HELLS     | AP003059.1 | 0.423634943 | 6.93E-25 | postive |
| KLHL24    | AP003059.1 | 0.560424182 | 6.71E-46 | postive |
| IREB2     | AP003059.1 | 0.496534064 | 6.73E-35 | postive |
| GABPB1    | AP003059.1 | 0.502752588 | 7.20E-36 | postive |
| PIK3CA    | AP003059.1 | 0.502199791 | 8.79E-36 | postive |
| KRAS      | AP003059.1 | 0.407503843 | 5.59E-23 | postive |

|           |            |              |           |          |
|-----------|------------|--------------|-----------|----------|
| MAPK8     | AP003059.1 | 0.412280055  | 1.56E-23  | postive  |
| LINC00472 | AP003059.1 | 0.795503378  | 6.37E-119 | postive  |
| PRKAA1    | AP003059.1 | 0.417500945  | 3.79E-24  | postive  |
| LPIN1     | AP003059.1 | 0.451049223  | 2.27E-28  | postive  |
| ATM       | AP003059.1 | 0.631537347  | 2.48E-61  | postive  |
| FBXW7     | AP003059.1 | 0.445052443  | 1.40E-27  | postive  |
| HELLS     | NEAT1      | 0.425193065  | 4.48E-25  | postive  |
| ZNF419    | NEAT1      | 0.475566995  | 9.10E-32  | postive  |
| KLHL24    | NEAT1      | 0.47164162   | 3.32E-31  | postive  |
| TUBE1     | NEAT1      | 0.526632493  | 8.64E-40  | postive  |
| ALOX12    | NEAT1      | 0.514057119  | 1.10E-37  | postive  |
| GABPB1    | NEAT1      | 0.546527663  | 2.65E-43  | postive  |
| MAPK8     | NEAT1      | 0.401102523  | 2.99E-22  | postive  |
| LINC00472 | NEAT1      | 0.791176363  | 9.26E-117 | postive  |
| LPIN1     | NEAT1      | 0.437963934  | 1.15E-26  | postive  |
| ATM       | NEAT1      | 0.626198505  | 4.93E-60  | postive  |
| FBXW7     | NEAT1      | 0.444326852  | 1.74E-27  | postive  |
| ALOX12    | AC009159.3 | 0.422565243  | 9.35E-25  | postive  |
| PHKG2     | AC009159.3 | 0.469988587  | 5.70E-31  | postive  |
| TAZ       | AC009159.3 | 0.584676725  | 9.75E-51  | postive  |
| HELLS     | AC116667.1 | 0.450193455  | 2.95E-28  | postive  |
| ZNF419    | AC116667.1 | 0.620612067  | 1.06E-58  | postive  |
| TUBE1     | AC116667.1 | 0.589209026  | 1.09E-51  | postive  |
| ALOX12    | AC116667.1 | 0.639309585  | 2.86E-63  | postive  |
| GABPB1    | AC116667.1 | 0.589327892  | 1.03E-51  | postive  |
| ATM       | AC116667.1 | 0.47360133   | 1.74E-31  | postive  |
| TAZ       | AC116667.1 | 0.43512333   | 2.62E-26  | postive  |
| FBXW7     | AC116667.1 | 0.530059908  | 2.23E-40  | postive  |
| HELLS     | AP002907.1 | 0.462382083  | 6.61E-30  | postive  |
| ZNF419    | AP002907.1 | 0.493149879  | 2.23E-34  | postive  |
| KLHL24    | AP002907.1 | 0.409061998  | 3.70E-23  | postive  |
| TUBE1     | AP002907.1 | 0.538336823  | 7.91E-42  | postive  |
| ALOX12    | AP002907.1 | 0.49610651   | 7.84E-35  | postive  |
| GABPB1    | AP002907.1 | 0.567958133  | 2.33E-47  | postive  |
| LINC00472 | AP002907.1 | 0.772918689  | 3.60E-108 | postive  |
| ATM       | AP002907.1 | 0.588145604  | 1.83E-51  | postive  |
| FBXW7     | AP002907.1 | 0.492406582  | 2.90E-34  | postive  |
| HELLS     | OSGEPL1-AS | 0.471206028  | 3.83E-31  | postive  |
| ZNF419    | OSGEPL1-AS | 0.485967982  | 2.71E-33  | postive  |
| TUBE1     | OSGEPL1-AS | 0.599132555  | 8.06E-54  | postive  |
| ALOX12    | OSGEPL1-AS | 0.583542955  | 1.68E-50  | postive  |
| GABPB1    | OSGEPL1-AS | 0.481863718  | 1.10E-32  | postive  |
| ATM       | OSGEPL1-AS | 0.573892994  | 1.55E-48  | postive  |
| EGLN2     | OSGEPL1-AS | 0.476233324  | 7.29E-32  | postive  |
| TAZ       | OSGEPL1-AS | 0.457793122  | 2.81E-29  | postive  |
| FBXW7     | OSGEPL1-AS | 0.504953809  | 3.22E-36  | postive  |
| BRD4      | AC005785.1 | 0.412405102  | 1.51E-23  | postive  |
| ZNF419    | AC005785.1 | 0.467468172  | 1.29E-30  | postive  |
| TUBE1     | AC005785.1 | 0.421415108  | 1.29E-24  | postive  |
| DRD4      | AC005785.1 | 0.411560398  | 1.90E-23  | postive  |
| ALOX12    | AC005785.1 | 0.411639314  | 1.86E-23  | postive  |
| SCP2      | AC005785.1 | -0.403550488 | 1.58E-22  | negative |
| NCOA4     | AC005785.1 | -0.517797327 | 2.65E-38  | negative |
| PHKG2     | AC005785.1 | 0.645708796  | 6.60E-65  | postive  |
| BECN1     | AC005785.1 | -0.425505989 | 4.10E-25  | negative |
| MAPK1     | AC005785.1 | -0.412017525 | 1.68E-23  | negative |
| TAZ       | AC005785.1 | 0.754978677  | 1.76E-100 | postive  |
| KLHL24    | AC234772.1 | 0.548497751  | 1.16E-43  | postive  |

|           |            |              |           |          |
|-----------|------------|--------------|-----------|----------|
| PIK3CA    | AC234772.1 | 0.420764784  | 1.54E-24  | postive  |
| LINC00472 | AC234772.1 | 0.874810301  | 3.81E-171 | postive  |
| ZNF419    | AL353796.1 | 0.462978687  | 5.46E-30  | postive  |
| TUBE1     | AL353796.1 | 0.534954982  | 3.13E-41  | postive  |
| ALOX12    | AL353796.1 | 0.446191242  | 9.93E-28  | postive  |
| GABPB1    | AL353796.1 | 0.474597792  | 1.25E-31  | postive  |
| TFAP2C    | AC010761.6 | 0.545362862  | 4.32E-43  | postive  |
| HBA1      | AC010761.6 | 0.456158446  | 4.68E-29  | postive  |
| IREB2     | AL033381.1 | 0.435900218  | 2.09E-26  | postive  |
| PRKAA2    | AL033381.1 | 0.491291648  | 4.28E-34  | postive  |
| ATM       | AL033381.1 | 0.694355093  | 9.18E-79  | postive  |
| ZNF419    | AC012313.6 | 0.571373045  | 4.93E-48  | postive  |
| VEGFA     | AC012313.6 | 0.410551886  | 2.48E-23  | postive  |
| TUBE1     | AC012313.6 | 0.518159085  | 2.31E-38  | postive  |
| SETD1B    | AC012313.6 | 0.439626433  | 7.03E-27  | postive  |
| ALOX12    | AC012313.6 | 0.63322619   | 9.50E-62  | postive  |
| ATM       | AC012313.6 | 0.411235582  | 2.07E-23  | postive  |
| HSPB1     | AL096828.3 | 0.453077903  | 1.22E-28  | postive  |
| HRAS      | AL096828.3 | 0.423277523  | 7.66E-25  | postive  |
| PHKG2     | AL096828.3 | 0.454439688  | 7.99E-29  | postive  |
| PRKAA2    | AL589745.1 | 0.471331422  | 3.68E-31  | postive  |
| TUBE1     | AC074124.1 | 0.479035005  | 2.86E-32  | postive  |
| ALOX12    | AC074124.1 | 0.432872848  | 5.03E-26  | postive  |
| ATM       | AC074124.1 | 0.42658507   | 3.03E-25  | postive  |
| ENPP2     | LINC00987  | 0.470472104  | 4.87E-31  | postive  |
| SLC1A4    | LINC00987  | 0.4555745    | 5.62E-29  | postive  |
| ATP5MC3   | LINC00987  | -0.421685317 | 1.19E-24  | negative |
| IL33      | LINC00987  | 0.466624252  | 1.70E-30  | postive  |
| HMGB1     | LINC00987  | 0.425284151  | 4.37E-25  | postive  |
| ZEB1      | LINC00987  | 0.576848504  | 3.93E-49  | postive  |
| EPAS1     | LINC00987  | 0.528726038  | 3.78E-40  | postive  |
| TFAP2C    | AC087501.4 | 0.512161937  | 2.23E-37  | postive  |
| HBA1      | AC087501.4 | 0.47291966   | 2.18E-31  | postive  |
| TUBE1     | AC109460.1 | 0.406554835  | 7.18E-23  | postive  |
| SETD1B    | AC109460.1 | 0.48210305   | 1.01E-32  | postive  |
| ALOX12    | AC109460.1 | 0.593703713  | 1.21E-52  | postive  |
| TAZ       | AC109460.1 | 0.427811908  | 2.14E-25  | postive  |
| FANCD2    | LINC02481  | 0.437868886  | 1.18E-26  | postive  |
| ALOX12    | LINC02481  | 0.408778961  | 3.99E-23  | postive  |
| TFAP2C    | LINC02481  | 0.481276935  | 1.34E-32  | postive  |
| HBA1      | LINC02481  | 0.448063322  | 5.64E-28  | postive  |
| HELLS     | AL136985.2 | 0.480763931  | 1.60E-32  | postive  |
| ZNF419    | AL136985.2 | 0.418730807  | 2.70E-24  | postive  |
| TUBE1     | AL136985.2 | 0.429527905  | 1.31E-25  | postive  |
| ALOX12    | AL136985.2 | 0.490263097  | 6.13E-34  | postive  |
| GABPB1    | AL136985.2 | 0.492209961  | 3.10E-34  | postive  |
| LINC00472 | AL136985.2 | 0.524704981  | 1.84E-39  | postive  |
| ATM       | AL136985.2 | 0.612075266  | 1.02E-56  | postive  |
| FBXW7     | AL136985.2 | 0.439171442  | 8.03E-27  | postive  |
| GABPB1    | LINC01752  | 0.413858057  | 1.02E-23  | postive  |
| ATM       | LINC01752  | 0.425642497  | 3.95E-25  | postive  |
| VEGFA     | AP001830.1 | 0.538093199  | 8.74E-42  | postive  |
| ALOX12    | AP001830.1 | 0.407813522  | 5.15E-23  | postive  |
| TAZ       | AP001830.1 | 0.4677111    | 1.20E-30  | postive  |
| FANCD2    | WNT5A-AS1  | 0.495688788  | 9.09E-35  | postive  |
| TFAP2C    | WNT5A-AS1  | 0.457878053  | 2.74E-29  | postive  |
| GABPB1    | AC120349.1 | 0.472376726  | 2.61E-31  | postive  |
| LINC00472 | AC120349.1 | 0.695520907  | 3.95E-79  | postive  |

|           |            |              |           |          |
|-----------|------------|--------------|-----------|----------|
| ZNF419    | AL031658.1 | 0.49541699   | 1.00E-34  | postive  |
| VEGFA     | AL031658.1 | 0.502633995  | 7.51E-36  | postive  |
| TUBE1     | AL031658.1 | 0.438422128  | 1.00E-26  | postive  |
| SETD1B    | AL031658.1 | 0.429163322  | 1.46E-25  | postive  |
| ALOX12    | AL031658.1 | 0.533800315  | 4.99E-41  | postive  |
| ZEB1      | AL031658.1 | 0.413060143  | 1.27E-23  | postive  |
| PTGS2     | AL391056.1 | 0.525909176  | 1.15E-39  | postive  |
| IL6       | AL391056.1 | 0.475234578  | 1.02E-31  | postive  |
| SLC2A3    | AL391056.1 | 0.405750129  | 8.88E-23  | postive  |
| GPX4      | AC008915.2 | 0.499258792  | 2.54E-35  | postive  |
| HSPB1     | AC008915.2 | 0.457154439  | 3.43E-29  | postive  |
| OTUB1     | AC008915.2 | 0.469086156  | 7.65E-31  | postive  |
| HBA1      | AC008915.2 | 0.430477242  | 1.00E-25  | postive  |
| KRAS      | AC008915.2 | -0.41607841  | 5.58E-24  | negative |
| HRAS      | AC008915.2 | 0.435577077  | 2.30E-26  | postive  |
| PHKG2     | AC008915.2 | 0.433163876  | 4.63E-26  | postive  |
| PRKAA1    | AC008915.2 | -0.415070565 | 7.35E-24  | negative |
| SIRT1     | AC008915.2 | -0.432980593 | 4.88E-26  | negative |
| HIC1      | RARA-AS1   | 0.433937487  | 3.70E-26  | postive  |
| HELLS     | AC008906.1 | 0.540555295  | 3.18E-42  | postive  |
| TUBE1     | AC008906.1 | 0.497159317  | 5.39E-35  | postive  |
| ALOX12    | AC008906.1 | 0.440393244  | 5.60E-27  | postive  |
| GABPB1    | AC008906.1 | 0.530202699  | 2.11E-40  | postive  |
| ATG7      | AC008906.1 | 0.408497175  | 4.30E-23  | postive  |
| LINC00472 | AC008906.1 | 0.649188166  | 8.18E-66  | postive  |
| ATM       | AC008906.1 | 0.740997147  | 6.21E-95  | postive  |
| FBXW7     | AC008906.1 | 0.499196699  | 2.60E-35  | postive  |
| ZNF419    | AC009336.1 | 0.532813626  | 7.42E-41  | postive  |
| VEGFA     | AC009336.1 | 0.485265734  | 3.45E-33  | postive  |
| TUBE1     | AC009336.1 | 0.484444222  | 4.57E-33  | postive  |
| SETD1B    | AC009336.1 | 0.435918782  | 2.08E-26  | postive  |
| ALOX12    | AC009336.1 | 0.507651078  | 1.20E-36  | postive  |
| GABPB1    | AC009336.1 | 0.471271384  | 3.75E-31  | postive  |
| ATM       | AC009336.1 | 0.535000881  | 3.07E-41  | postive  |
| FBXW7     | AC009336.1 | 0.485299649  | 3.41E-33  | postive  |
| HELLS     | AC093620.1 | 0.402221985  | 2.24E-22  | postive  |
| ZNF419    | AC093620.1 | 0.463078068  | 5.29E-30  | postive  |
| KLHL24    | AC093620.1 | 0.427498141  | 2.34E-25  | postive  |
| GABPB1    | AC093620.1 | 0.496373019  | 7.13E-35  | postive  |
| LINC00472 | AC093620.1 | 0.648380377  | 1.33E-65  | postive  |
| LPIN1     | AC093620.1 | 0.439042707  | 8.34E-27  | postive  |
| ATM       | AC093620.1 | 0.504755475  | 3.47E-36  | postive  |
| FBXW7     | AC093620.1 | 0.429528416  | 1.31E-25  | postive  |
| KLHL24    | C1orf195   | 0.588455899  | 1.58E-51  | postive  |
| GABPB1    | C1orf195   | 0.419469274  | 2.20E-24  | postive  |
| PIK3CA    | C1orf195   | 0.473024181  | 2.11E-31  | postive  |
| KRAS      | C1orf195   | 0.411583221  | 1.88E-23  | postive  |
| LINC00472 | C1orf195   | 0.953431848  | 1.04E-281 | postive  |
| PML       | AC145098.1 | 0.472513439  | 2.50E-31  | postive  |
| NCF2      | AC145098.1 | 0.495828746  | 8.65E-35  | postive  |
| CYBB      | AC145098.1 | 0.48865851   | 1.07E-33  | postive  |
| HELLS     | AC025034.1 | 0.523252654  | 3.24E-39  | postive  |
| ZNF419    | AC025034.1 | 0.489983065  | 6.76E-34  | postive  |
| TUBE1     | AC025034.1 | 0.562859934  | 2.28E-46  | postive  |
| ALOX12    | AC025034.1 | 0.546058049  | 3.23E-43  | postive  |
| GABPB1    | AC025034.1 | 0.55179249   | 2.85E-44  | postive  |
| LINC00472 | AC025034.1 | 0.631807933  | 2.13E-61  | postive  |
| ATM       | AC025034.1 | 0.574834541  | 1.00E-48  | postive  |

|           |            |              |          |          |
|-----------|------------|--------------|----------|----------|
| FBXW7     | AC025034.1 | 0.511981869  | 2.39E-37 | postive  |
| PRKAA2    | LINC01135  | 0.414674095  | 8.18E-24 | postive  |
| ATM       | LINC01135  | 0.479894829  | 2.14E-32 | postive  |
| ACSF2     | CEBPA-DT   | 0.476843339  | 5.95E-32 | postive  |
| HELLS     | SLC2A9-AS1 | 0.528346958  | 4.40E-40 | postive  |
| TUBE1     | SLC2A9-AS1 | 0.421214964  | 1.36E-24 | postive  |
| ALOX12    | SLC2A9-AS1 | 0.423001412  | 8.28E-25 | postive  |
| GABPB1    | SLC2A9-AS1 | 0.484400967  | 4.64E-33 | postive  |
| LINC00472 | SLC2A9-AS1 | 0.434799635  | 2.88E-26 | postive  |
| ATM       | SLC2A9-AS1 | 0.649723751  | 5.92E-66 | postive  |
| FBXW7     | SLC2A9-AS1 | 0.416748601  | 4.65E-24 | postive  |
| FANCD2    | MZF1-AS1   | 0.492944985  | 2.40E-34 | postive  |
| HELLS     | MZF1-AS1   | 0.419154     | 2.40E-24 | postive  |
| ZNF419    | MZF1-AS1   | 0.50260571   | 7.59E-36 | postive  |
| ALOX12    | MZF1-AS1   | 0.548086767  | 1.38E-43 | postive  |
| TFAP2C    | MZF1-AS1   | 0.45270867   | 1.36E-28 | postive  |
| HELLS     | AC009542.1 | 0.489269027  | 8.66E-34 | postive  |
| TUBE1     | AC009542.1 | 0.454930225  | 6.86E-29 | postive  |
| ALOX12    | AC009542.1 | 0.446507439  | 9.02E-28 | postive  |
| GABPB1    | AC009542.1 | 0.445154338  | 1.36E-27 | postive  |
| LINC00472 | AC009542.1 | 0.463457528  | 4.69E-30 | postive  |
| ATM       | AC009542.1 | 0.665165993  | 3.90E-70 | postive  |
| FBXW7     | AC009542.1 | 0.429891777  | 1.18E-25 | postive  |
| HSF1      | AC027307.2 | 0.443351479  | 2.33E-27 | postive  |
| NCOA4     | AC027307.2 | -0.429417963 | 1.36E-25 | negative |
| TLR4      | AC027307.2 | -0.409926548 | 2.94E-23 | negative |
| ATF4      | MIR210HG   | 0.402991164  | 1.83E-22 | postive  |
| CA9       | MIR210HG   | 0.511625632  | 2.73E-37 | postive  |
| VEGFA     | MIR210HG   | 0.53253073   | 8.31E-41 | postive  |
| DRD4      | MIR210HG   | 0.410221989  | 2.71E-23 | postive  |
| EIF2AK4   | MIR210HG   | -0.413287829 | 1.19E-23 | negative |
| ALOX12    | MIR210HG   | 0.445592083  | 1.19E-27 | postive  |
| PHKG2     | MIR210HG   | 0.440420508  | 5.56E-27 | postive  |
| TAZ       | MIR210HG   | 0.627929991  | 1.88E-60 | postive  |
| TUBE1     | LINC00861  | 0.470965968  | 4.15E-31 | postive  |
| ALOX12    | LINC00861  | 0.525577742  | 1.31E-39 | postive  |
| GABPB1    | LINC00861  | 0.441344083  | 4.23E-27 | postive  |
| IFNG      | LINC00861  | 0.432476417  | 5.64E-26 | postive  |
| ATM       | LINC00861  | 0.525149511  | 1.55E-39 | postive  |
| FBXW7     | LINC00861  | 0.486758728  | 2.06E-33 | postive  |
| HELLS     | AC025430.1 | 0.579465599  | 1.16E-49 | postive  |
| ZNF419    | AC025430.1 | 0.400083784  | 3.89E-22 | postive  |
| TUBE1     | AC025430.1 | 0.43842366   | 1.00E-26 | postive  |
| ALOX12    | AC025430.1 | 0.52207433   | 5.12E-39 | postive  |
| GABPB1    | AC025430.1 | 0.545020609  | 4.99E-43 | postive  |
| ATG7      | AC025430.1 | 0.410888464  | 2.27E-23 | postive  |
| LINC00472 | AC025430.1 | 0.63412652   | 5.69E-62 | postive  |
| ATM       | AC025430.1 | 0.66913363   | 2.99E-71 | postive  |
| FBXW7     | AC025430.1 | 0.502372723  | 8.26E-36 | postive  |
| HELLS     | AC004492.1 | 0.528294872  | 4.49E-40 | postive  |
| ZNF419    | AC004492.1 | 0.412234231  | 1.58E-23 | postive  |
| KLHL24    | AC004492.1 | 0.490178855  | 6.31E-34 | postive  |
| TUBE1     | AC004492.1 | 0.545785643  | 3.62E-43 | postive  |
| MAP3K5    | AC004492.1 | 0.410003832  | 2.88E-23 | postive  |
| ALOX12    | AC004492.1 | 0.509004403  | 7.25E-37 | postive  |
| IREB2     | AC004492.1 | 0.489237929  | 8.76E-34 | postive  |
| GABPB1    | AC004492.1 | 0.602695671  | 1.33E-54 | postive  |
| PIK3CA    | AC004492.1 | 0.472283353  | 2.69E-31 | postive  |

|           |            |              |           |          |
|-----------|------------|--------------|-----------|----------|
| MAPK8     | AC004492.1 | 0.487173363  | 1.79E-33  | postive  |
| LINC00472 | AC004492.1 | 0.773606781  | 1.76E-108 | postive  |
| PRKAA1    | AC004492.1 | 0.422090291  | 1.07E-24  | postive  |
| ATM       | AC004492.1 | 0.791494555  | 6.44E-117 | postive  |
| FBXW7     | AC004492.1 | 0.528145963  | 4.76E-40  | postive  |
| LINC00472 | ACTA2-AS1  | 0.498031817  | 3.94E-35  | postive  |
| CISD2     | TAF1A-AS1  | 0.427567853  | 2.29E-25  | postive  |
| FANCD2    | CDK6-AS1   | 0.600917599  | 3.27E-54  | postive  |
| HELLS     | CDK6-AS1   | 0.410537448  | 2.49E-23  | postive  |
| STMN1     | CDK6-AS1   | 0.750378578  | 1.29E-98  | postive  |
| RRM2      | CDK6-AS1   | 0.583260073  | 1.92E-50  | postive  |
| AURKA     | CDK6-AS1   | 0.600839779  | 3.40E-54  | postive  |
| CDKN2A    | CDK6-AS1   | 0.689426732  | 3.10E-77  | postive  |
| HBA1      | AC104667.2 | 0.546323995  | 2.89E-43  | postive  |
| HELLS     | POC1B-AS1  | 0.532531886  | 8.30E-41  | postive  |
| ZNF419    | POC1B-AS1  | 0.506301799  | 1.97E-36  | postive  |
| TUBE1     | POC1B-AS1  | 0.553008071  | 1.69E-44  | postive  |
| ALOX12    | POC1B-AS1  | 0.555839235  | 4.98E-45  | postive  |
| GABPB1    | POC1B-AS1  | 0.591993755  | 2.81E-52  | postive  |
| MAPK8     | POC1B-AS1  | 0.414851331  | 7.80E-24  | postive  |
| LINC00472 | POC1B-AS1  | 0.694196709  | 1.03E-78  | postive  |
| ATM       | POC1B-AS1  | 0.744532155  | 2.66E-96  | postive  |
| FBXW7     | POC1B-AS1  | 0.563460145  | 1.75E-46  | postive  |
| HELLS     | AC025171.4 | 0.424316809  | 5.73E-25  | postive  |
| ZNF419    | AC025171.4 | 0.460626954  | 1.15E-29  | postive  |
| TUBE1     | AC025171.4 | 0.492568678  | 2.74E-34  | postive  |
| ALOX12    | AC025171.4 | 0.483928645  | 5.45E-33  | postive  |
| PHKG2     | AC025171.4 | 0.473526432  | 1.79E-31  | postive  |
| TAZ       | AC025171.4 | 0.567151242  | 3.35E-47  | postive  |
| HELLS     | AC105389.2 | 0.421141236  | 1.39E-24  | postive  |
| MTOR      | AC105389.2 | 0.413386476  | 1.16E-23  | postive  |
| KLHL24    | AC105389.2 | 0.59855759   | 1.08E-53  | postive  |
| TUBE1     | AC105389.2 | 0.419640823  | 2.10E-24  | postive  |
| MAP3K5    | AC105389.2 | 0.410393404  | 2.59E-23  | postive  |
| IREB2     | AC105389.2 | 0.529103746  | 3.26E-40  | postive  |
| GABPB1    | AC105389.2 | 0.566094041  | 5.39E-47  | postive  |
| PIK3CA    | AC105389.2 | 0.542060771  | 1.71E-42  | postive  |
| KRAS      | AC105389.2 | 0.464726855  | 3.12E-30  | postive  |
| ATG7      | AC105389.2 | 0.420991956  | 1.45E-24  | postive  |
| MAPK8     | AC105389.2 | 0.468501779  | 9.25E-31  | postive  |
| LINC00472 | AC105389.2 | 0.877185824  | 3.11E-173 | postive  |
| PRKAA1    | AC105389.2 | 0.466102569  | 2.01E-30  | postive  |
| TGFBR1    | AC105389.2 | 0.408620884  | 4.16E-23  | postive  |
| LPIN1     | AC105389.2 | 0.469951626  | 5.77E-31  | postive  |
| ATM       | AC105389.2 | 0.670767308  | 1.03E-71  | postive  |
| FBXW7     | AC105389.2 | 0.474797609  | 1.17E-31  | postive  |
| TFAP2C    | AL354872.1 | 0.457862794  | 2.75E-29  | postive  |
| HBA1      | AL354872.1 | 0.41866204   | 2.75E-24  | postive  |
| FANCD2    | MYG1-AS1   | 0.401633627  | 2.61E-22  | postive  |
| SCP2      | MYG1-AS1   | -0.414697925 | 8.13E-24  | negative |
| NCOA4     | MYG1-AS1   | -0.438527247 | 9.71E-27  | negative |
| PHKG2     | MYG1-AS1   | 0.57176885   | 4.11E-48  | postive  |
| MAPK1     | MYG1-AS1   | -0.416923923 | 4.43E-24  | negative |
| TAZ       | MYG1-AS1   | 0.598572076  | 1.07E-53  | postive  |
| ALOX12    | ID2-AS1    | 0.459696571  | 1.55E-29  | postive  |
| ATF4      | GAS5       | 0.438211302  | 1.07E-26  | postive  |
| RPL8      | GAS5       | 0.593902379  | 1.10E-52  | postive  |
| TFAP2C    | BMPR1B-DT  | 0.551108413  | 3.81E-44  | postive  |



|           |            |              |          |          |
|-----------|------------|--------------|----------|----------|
| HBA1      | BMPR1B-DT  | 0.452102564  | 1.64E-28 | postive  |
| SLC2A12   | AL049838.1 | 0.453246979  | 1.15E-28 | postive  |
| WIP12     | AL049838.1 | 0.405876489  | 8.59E-23 | postive  |
| LPIN1     | AL049838.1 | 0.41531749   | 6.87E-24 | postive  |
| ZNF419    | AL583856.2 | 0.410965636  | 2.22E-23 | postive  |
| TUBE1     | AL583856.2 | 0.449448403  | 3.70E-28 | postive  |
| ALOX12    | AL583856.2 | 0.472212774  | 2.76E-31 | postive  |
| TFAP2C    | AL583856.2 | 0.419434633  | 2.23E-24 | postive  |
| BRD4      | CTBP1-AS   | 0.47374715   | 1.66E-31 | postive  |
| ZNF419    | CTBP1-AS   | 0.589908407  | 7.79E-52 | postive  |
| VEGFA     | CTBP1-AS   | 0.490686408  | 5.29E-34 | postive  |
| TUBE1     | CTBP1-AS   | 0.582733693  | 2.46E-50 | postive  |
| SETD1B    | CTBP1-AS   | 0.600567217  | 3.91E-54 | postive  |
| ALOX12    | CTBP1-AS   | 0.687776207  | 9.92E-77 | postive  |
| GABPB1    | CTBP1-AS   | 0.452333059  | 1.53E-28 | postive  |
| ATM       | CTBP1-AS   | 0.48726816   | 1.73E-33 | postive  |
| TAZ       | CTBP1-AS   | 0.506757706  | 1.66E-36 | postive  |
| FBXW7     | CTBP1-AS   | 0.47922596   | 2.68E-32 | postive  |
| ZNF419    | AC012254.1 | 0.423278593  | 7.66E-25 | postive  |
| TUBE1     | AC012254.1 | 0.491836685  | 3.54E-34 | postive  |
| ALOX12    | AC012254.1 | 0.428630325  | 1.70E-25 | postive  |
| GABPB1    | AC012254.1 | 0.523263141  | 3.23E-39 | postive  |
| MAPK8     | AC012254.1 | 0.422764129  | 8.84E-25 | postive  |
| LINC00472 | AC012254.1 | 0.627801325  | 2.02E-60 | postive  |
| ATM       | AC012254.1 | 0.650499223  | 3.70E-66 | postive  |
| FBXW7     | AC012254.1 | 0.541412294  | 2.24E-42 | postive  |
| HELLS     | LINC02449  | 0.476706354  | 6.23E-32 | postive  |
| ZNF419    | LINC02449  | 0.453024378  | 1.24E-28 | postive  |
| SETD1B    | LINC02449  | 0.416356516  | 5.18E-24 | postive  |
| ALOX12    | LINC02449  | 0.442541627  | 2.96E-27 | postive  |
| ATM       | LINC02449  | 0.400894903  | 3.16E-22 | postive  |
| PCK2      | PCAT7      | 0.40344155   | 1.63E-22 | postive  |
| HELLS     | ZNF460-AS1 | 0.43289391   | 5.00E-26 | postive  |
| ZNF419    | ZNF460-AS1 | 0.63526998   | 2.96E-62 | postive  |
| TUBE1     | ZNF460-AS1 | 0.510339322  | 4.42E-37 | postive  |
| ALOX12    | ZNF460-AS1 | 0.562756372  | 2.39E-46 | postive  |
| GABPB1    | ZNF460-AS1 | 0.471668673  | 3.29E-31 | postive  |
| PHKG2     | ZNF460-AS1 | 0.434439821  | 3.20E-26 | postive  |
| LINC00472 | ZNF460-AS1 | 0.476023662  | 7.82E-32 | postive  |
| LPIN1     | ZNF460-AS1 | 0.450177105  | 2.96E-28 | postive  |
| ATM       | ZNF460-AS1 | 0.415491419  | 6.55E-24 | postive  |
| TAZ       | ZNF460-AS1 | 0.499528504  | 2.31E-35 | postive  |
| FBXW7     | ZNF460-AS1 | 0.444357706  | 1.72E-27 | postive  |
| NRAS      | AC020910.5 | -0.442905563 | 2.66E-27 | negative |
| NCOA4     | AC020910.5 | -0.409566357 | 3.23E-23 | negative |
| PHKG2     | AC020910.5 | 0.508385379  | 9.12E-37 | postive  |
| MAPK1     | AC020910.5 | -0.431183855 | 8.18E-26 | negative |
| TAZ       | AC020910.5 | 0.523473799  | 2.97E-39 | postive  |
| FANCD2    | AC079922.2 | 0.588498672  | 1.55E-51 | postive  |
| ASNS      | AC079922.2 | 0.423648294  | 6.91E-25 | postive  |
| SLC2A6    | AC079922.2 | 0.487697252  | 1.49E-33 | postive  |
| RRM2      | AC079922.2 | 0.408624273  | 4.15E-23 | postive  |
| AURKA     | AC079922.2 | 0.437812532  | 1.20E-26 | postive  |
| CARS1     | AC079922.2 | 0.403704466  | 1.52E-22 | postive  |
| PHKG2     | AC079922.2 | 0.513268901  | 1.47E-37 | postive  |
| EGLN2     | AC079922.2 | 0.479218596  | 2.69E-32 | postive  |
| TAZ       | AC079922.2 | 0.565780539  | 6.20E-47 | postive  |
| RGS4      | AC016405.2 | 0.677983113  | 8.42E-74 | postive  |

|           |            |              |           |          |
|-----------|------------|--------------|-----------|----------|
| BRD4      | AC005519.1 | 0.424235724  | 5.86E-25  | postive  |
| ZNF419    | AC005519.1 | 0.623344961  | 2.38E-59  | postive  |
| VEGFA     | AC005519.1 | 0.531912814  | 1.06E-40  | postive  |
| TUBE1     | AC005519.1 | 0.654178713  | 3.90E-67  | postive  |
| SETD1B    | AC005519.1 | 0.547529805  | 1.74E-43  | postive  |
| ALOX12    | AC005519.1 | 0.789618983  | 5.40E-116 | postive  |
| GABPB1    | AC005519.1 | 0.454943544  | 6.83E-29  | postive  |
| ATM       | AC005519.1 | 0.557152529  | 2.81E-45  | postive  |
| YY1AP1    | AC005519.1 | 0.404934245  | 1.10E-22  | postive  |
| TAZ       | AC005519.1 | 0.49399992   | 1.65E-34  | postive  |
| FBXW7     | AC005519.1 | 0.445347953  | 1.28E-27  | postive  |
| LINC00472 | AC139100.1 | 0.478523759  | 3.39E-32  | postive  |
| HELLS     | AL162724.1 | 0.545360465  | 4.33E-43  | postive  |
| TUBE1     | AL162724.1 | 0.446314885  | 9.56E-28  | postive  |
| ALOX12    | AL162724.1 | 0.481254767  | 1.35E-32  | postive  |
| GABPB1    | AL162724.1 | 0.489790256  | 7.23E-34  | postive  |
| ATG7      | AL162724.1 | 0.42388459   | 6.47E-25  | postive  |
| LINC00472 | AL162724.1 | 0.486953798  | 1.93E-33  | postive  |
| ATM       | AL162724.1 | 0.685461138  | 5.00E-76  | postive  |
| FBXW7     | AL162724.1 | 0.442768012  | 2.77E-27  | postive  |
| RPL8      | TIPARP-AS1 | 0.454362391  | 8.18E-29  | postive  |
| ALOX12    | AL359921.2 | 0.501751563  | 1.03E-35  | postive  |
| NCOA4     | AL359921.2 | -0.460947291 | 1.04E-29  | negative |
| PHKG2     | AL359921.2 | 0.438553001  | 9.64E-27  | postive  |
| TAZ       | AL359921.2 | 0.603504429  | 8.77E-55  | postive  |
| HELLS     | AL161725.1 | 0.529176787  | 3.16E-40  | postive  |
| KLHL24    | AL161725.1 | 0.423793259  | 6.63E-25  | postive  |
| TUBE1     | AL161725.1 | 0.565028708  | 8.69E-47  | postive  |
| ALOX12    | AL161725.1 | 0.573943855  | 1.51E-48  | postive  |
| IREB2     | AL161725.1 | 0.486298294  | 2.42E-33  | postive  |
| GABPB1    | AL161725.1 | 0.566275232  | 4.97E-47  | postive  |
| PIK3CA    | AL161725.1 | 0.426343699  | 3.24E-25  | postive  |
| ATG7      | AL161725.1 | 0.429897733  | 1.18E-25  | postive  |
| MAPK8     | AL161725.1 | 0.478919688  | 2.97E-32  | postive  |
| LINC00472 | AL161725.1 | 0.723741472  | 1.45E-88  | postive  |
| ATM       | AL161725.1 | 0.781723389  | 3.29E-112 | postive  |
| FBXW7     | AL161725.1 | 0.497867199  | 4.18E-35  | postive  |
| KLHL24    | AC010300.1 | 0.510254962  | 4.56E-37  | postive  |
| GABPB1    | AC010300.1 | 0.407781928  | 5.19E-23  | postive  |
| LINC00472 | AC010300.1 | 0.885943178  | 2.54E-181 | postive  |
| LPIN1     | AC010300.1 | 0.424724893  | 5.11E-25  | postive  |
| TFAP2C    | AC092756.1 | 0.584657962  | 9.84E-51  | postive  |
| HBA1      | AC092756.1 | 0.515466638  | 6.43E-38  | postive  |
| DUOX1     | AC092756.1 | 0.425531652  | 4.07E-25  | postive  |
| PHKG2     | AL162258.2 | 0.480723719  | 1.62E-32  | postive  |
| HELLS     | AC007376.2 | 0.40895587   | 3.80E-23  | postive  |
| MTOR      | AC007376.2 | 0.428809833  | 1.61E-25  | postive  |
| TUBE1     | AC007376.2 | 0.425949945  | 3.62E-25  | postive  |
| IREB2     | AC007376.2 | 0.448329303  | 5.20E-28  | postive  |
| GABPB1    | AC007376.2 | 0.612152923  | 9.83E-57  | postive  |
| PIK3CA    | AC007376.2 | 0.464837882  | 3.02E-30  | postive  |
| ATG7      | AC007376.2 | 0.454660035  | 7.46E-29  | postive  |
| ZEB1      | AC007376.2 | 0.557264433  | 2.68E-45  | postive  |
| MAPK8     | AC007376.2 | 0.50120892   | 1.26E-35  | postive  |
| LINC00472 | AC007376.2 | 0.582666222  | 2.54E-50  | postive  |
| TLR4      | AC007376.2 | 0.427958608  | 2.05E-25  | postive  |
| ATM       | AC007376.2 | 0.69430246   | 9.53E-79  | postive  |
| FBXW7     | AC007376.2 | 0.540301988  | 3.53E-42  | postive  |

|           |             |              |           |          |
|-----------|-------------|--------------|-----------|----------|
| HELLS     | AC106795.2  | 0.409955853  | 2.91E-23  | postive  |
| ZNF419    | AC106795.2  | 0.431260966  | 8.00E-26  | postive  |
| TUBE1     | AC106795.2  | 0.466130261  | 1.99E-30  | postive  |
| ALOX12    | AC106795.2  | 0.482430762  | 9.08E-33  | postive  |
| PHKG2     | AC106795.2  | 0.445625055  | 1.18E-27  | postive  |
| TAZ       | AC106795.2  | 0.469355734  | 7.01E-31  | postive  |
| HELLS     | AC115989.1  | 0.496054824  | 7.98E-35  | postive  |
| ALOX12    | AC115989.1  | 0.463838477  | 4.15E-30  | postive  |
| TFAP2C    | AC115989.1  | 0.417216945  | 4.09E-24  | postive  |
| DUOX1     | AC115989.1  | 0.441788274  | 3.71E-27  | postive  |
| LINC00472 | AC115989.1  | 0.404661854  | 1.18E-22  | postive  |
| ATM       | AC115989.1  | 0.467787127  | 1.17E-30  | postive  |
| HSPB1     | AP001363.2  | 0.417148439  | 4.17E-24  | postive  |
| RPL8      | AP001363.2  | 0.447655899  | 6.38E-28  | postive  |
| HBA1      | AP001363.2  | 0.568028961  | 2.25E-47  | postive  |
| HRAS      | AP001363.2  | 0.744617421  | 2.46E-96  | postive  |
| MAP1LC3A  | AP001363.2  | 0.447451735  | 6.78E-28  | postive  |
| EGLN2     | AP001363.2  | 0.75180547   | 3.45E-99  | postive  |
| ALOX12    | GAS6-AS1    | 0.494909182  | 1.20E-34  | postive  |
| TAZ       | GAS6-AS1    | 0.446752609  | 8.38E-28  | postive  |
| GPX4      | AC073896.2  | 0.49439331   | 1.44E-34  | postive  |
| STAT3     | AC073896.2  | -0.439015663 | 8.41E-27  | negative |
| ISCU      | AC073896.2  | 0.444792977  | 1.51E-27  | postive  |
| OTUB1     | AC073896.2  | 0.436526446  | 1.74E-26  | postive  |
| SLC2A8    | AC073896.2  | 0.424089752  | 6.11E-25  | postive  |
| PHKG2     | AC073896.2  | 0.412748114  | 1.38E-23  | postive  |
| ATG4D     | AC073896.2  | 0.554962573  | 7.28E-45  | postive  |
| MAP1LC3A  | AC073896.2  | 0.465022979  | 2.84E-30  | postive  |
| GABARAPL2 | AC073896.2  | 0.425988116  | 3.58E-25  | postive  |
| SIRT1     | AC073896.2  | -0.412868059 | 1.33E-23  | negative |
| HELLS     | AL353593.2  | 0.475867582  | 8.24E-32  | postive  |
| TUBE1     | AL353593.2  | 0.456196824  | 4.63E-29  | postive  |
| ALOX12    | AL353593.2  | 0.496195738  | 7.59E-35  | postive  |
| GABPB1    | AL353593.2  | 0.449635497  | 3.49E-28  | postive  |
| LINC00472 | AL353593.2  | 0.458887725  | 1.99E-29  | postive  |
| ATM       | AL353593.2  | 0.687330204  | 1.36E-76  | postive  |
| FBXW7     | AL353593.2  | 0.430172813  | 1.09E-25  | postive  |
| PML       | PCED1B-AS1  | 0.497324053  | 5.08E-35  | postive  |
| GCH1      | PCED1B-AS1  | 0.448391649  | 5.10E-28  | postive  |
| HAMP      | PCED1B-AS1  | 0.4458542    | 1.10E-27  | postive  |
| SLC2A6    | PCED1B-AS1  | 0.489796282  | 7.21E-34  | postive  |
| CYBB      | PCED1B-AS1  | 0.40126147   | 2.87E-22  | postive  |
| IFNG      | PCED1B-AS1  | 0.671715816  | 5.51E-72  | postive  |
| ISCU      | FOXP4-AS1   | 0.431604399  | 7.25E-26  | postive  |
| TFAP2C    | FOXP4-AS1   | 0.409056661  | 3.70E-23  | postive  |
| GABARAPL2 | FOXP4-AS1   | 0.414037185  | 9.72E-24  | postive  |
| GABARAPL1 | FOXP4-AS1   | 0.409608003  | 3.20E-23  | postive  |
| HELLS     | AC026124.2  | 0.464515108  | 3.34E-30  | postive  |
| KLHL24    | AC026124.2  | 0.431636927  | 7.18E-26  | postive  |
| TUBE1     | AC026124.2  | 0.412291036  | 1.56E-23  | postive  |
| GABPB1    | AC026124.2  | 0.552923625  | 1.75E-44  | postive  |
| PIK3CA    | AC026124.2  | 0.416718923  | 4.69E-24  | postive  |
| MAPK8     | AC026124.2  | 0.452915636  | 1.28E-28  | postive  |
| LINC00472 | AC026124.2  | 0.836514085  | 2.07E-142 | postive  |
| ATM       | AC026124.2  | 0.66176616   | 3.41E-69  | postive  |
| FBXW7     | AC026124.2  | 0.434917098  | 2.79E-26  | postive  |
| KLHL24    | MID1IP1-AS1 | 0.400872115  | 3.17E-22  | postive  |
| CS        | MID1IP1-AS1 | 0.467503144  | 1.28E-30  | postive  |

|           |             |             |           |         |
|-----------|-------------|-------------|-----------|---------|
| GABARAPL1 | MID1IP1-AS1 | 0.524624415 | 1.90E-39  | postive |
| LPIN1     | MID1IP1-AS1 | 0.423314741 | 7.58E-25  | postive |
| MTOR      | MAGI2-AS3   | 0.405543444 | 9.38E-23  | postive |
| ACSL3     | MAGI2-AS3   | 0.41731216  | 3.99E-24  | postive |
| HIF1A     | MAGI2-AS3   | 0.447953683 | 5.83E-28  | postive |
| KLHL24    | MAGI2-AS3   | 0.413421401 | 1.15E-23  | postive |
| IREB2     | MAGI2-AS3   | 0.467787727 | 1.17E-30  | postive |
| GABPB1    | MAGI2-AS3   | 0.507854602 | 1.11E-36  | postive |
| PIK3CA    | MAGI2-AS3   | 0.473535555 | 1.78E-31  | postive |
| KRAS      | MAGI2-AS3   | 0.411362888 | 2.00E-23  | postive |
| ZEB1      | MAGI2-AS3   | 0.403658749 | 1.54E-22  | postive |
| MAPK8     | MAGI2-AS3   | 0.469412278 | 6.88E-31  | postive |
| LINC00472 | MAGI2-AS3   | 0.417385304 | 3.91E-24  | postive |
| PRKAA1    | MAGI2-AS3   | 0.423765592 | 6.69E-25  | postive |
| LPIN1     | MAGI2-AS3   | 0.411794122 | 1.78E-23  | postive |
| HELLS     | AC130895.1  | 0.465133943 | 2.74E-30  | postive |
| KLHL24    | AC130895.1  | 0.477719128 | 4.44E-32  | postive |
| IREB2     | AC130895.1  | 0.424575035 | 5.33E-25  | postive |
| GABPB1    | AC130895.1  | 0.541297956 | 2.34E-42  | postive |
| PIK3CA    | AC130895.1  | 0.449889641 | 3.23E-28  | postive |
| ATG7      | AC130895.1  | 0.427369615 | 2.43E-25  | postive |
| MAPK8     | AC130895.1  | 0.401084632 | 3.00E-22  | postive |
| LINC00472 | AC130895.1  | 0.871576586 | 2.26E-168 | postive |
| ATM       | AC130895.1  | 0.647373035 | 2.44E-65  | postive |
| FBXW7     | AC130895.1  | 0.406038442 | 8.23E-23  | postive |
| KLHL24    | AC107398.2  | 0.627567877 | 2.30E-60  | postive |
| IREB2     | AC107398.2  | 0.403111302 | 1.77E-22  | postive |
| GABPB1    | AC107398.2  | 0.410200962 | 2.73E-23  | postive |
| PIK3CA    | AC107398.2  | 0.489504882 | 7.98E-34  | postive |
| KRAS      | AC107398.2  | 0.432341317 | 5.87E-26  | postive |
| LINC00472 | AC107398.2  | 0.945610097 | 4.56E-264 | postive |
| LPIN1     | AC107398.2  | 0.427936936 | 2.06E-25  | postive |
| MTOR      | AC012313.5  | 0.52996152  | 2.32E-40  | postive |
| OXSR1     | AC012313.5  | 0.412371628 | 1.52E-23  | postive |
| ZNF419    | AC012313.5  | 0.533732096 | 5.13E-41  | postive |
| IREB2     | AC012313.5  | 0.482913302 | 7.70E-33  | postive |
| GABPB1    | AC012313.5  | 0.455346409 | 6.03E-29  | postive |
| MAPK8     | AC012313.5  | 0.49599917  | 8.14E-35  | postive |
| LINC00472 | AC012313.5  | 0.416559544 | 4.90E-24  | postive |
| ATM       | AC012313.5  | 0.533457492 | 5.73E-41  | postive |
| HELLS     | SEC62-AS1   | 0.519642203 | 1.31E-38  | postive |
| ZNF419    | SEC62-AS1   | 0.410544088 | 2.49E-23  | postive |
| TUBE1     | SEC62-AS1   | 0.554852013 | 7.63E-45  | postive |
| ALOX12    | SEC62-AS1   | 0.544735515 | 5.62E-43  | postive |
| IREB2     | SEC62-AS1   | 0.400482325 | 3.51E-22  | postive |
| GABPB1    | SEC62-AS1   | 0.5452729   | 4.49E-43  | postive |
| ATG7      | SEC62-AS1   | 0.407955225 | 4.96E-23  | postive |
| MAPK8     | SEC62-AS1   | 0.441312867 | 4.27E-27  | postive |
| LINC00472 | SEC62-AS1   | 0.549491162 | 7.59E-44  | postive |
| ATM       | SEC62-AS1   | 0.770189816 | 5.90E-107 | postive |
| FBXW7     | SEC62-AS1   | 0.515099762 | 7.39E-38  | postive |
| HELLS     | AL133230.1  | 0.510738737 | 3.81E-37  | postive |
| TUBE1     | AL133230.1  | 0.456259593 | 4.54E-29  | postive |
| ALOX12    | AL133230.1  | 0.492199751 | 3.11E-34  | postive |
| GABPB1    | AL133230.1  | 0.508835688 | 7.72E-37  | postive |
| LINC00472 | AL133230.1  | 0.578869659 | 1.53E-49  | postive |
| ATM       | AL133230.1  | 0.714820734 | 1.86E-85  | postive |
| FBXW7     | AL133230.1  | 0.499233174 | 2.56E-35  | postive |

|           |            |              |          |          |
|-----------|------------|--------------|----------|----------|
| GPX4      | AL121832.2 | 0.422960376  | 8.37E-25 | postive  |
| HSPB1     | AL121832.2 | 0.52544569   | 1.38E-39 | postive  |
| OTUB1     | AL121832.2 | 0.401756474  | 2.52E-22 | postive  |
| HRAS      | AL121832.2 | 0.700796246  | 8.27E-81 | postive  |
| NCOA4     | AL121832.2 | -0.443889913 | 1.98E-27 | negative |
| PHKG2     | AL121832.2 | 0.558683439  | 1.44E-45 | postive  |
| MAP1LC3A  | AL121832.2 | 0.473528342  | 1.79E-31 | postive  |
| ANO6      | AL121832.2 | -0.416809558 | 4.57E-24 | negative |
| EGLN2     | AL121832.2 | 0.645450959  | 7.70E-65 | postive  |
| TAZ       | AL121832.2 | 0.559809193  | 8.80E-46 | postive  |
| CD44      | AL355916.1 | 0.492703727  | 2.61E-34 | postive  |
| LAMP2     | AL355916.1 | 0.432836275  | 5.09E-26 | postive  |
| HELLS     | AL512652.1 | 0.44326151   | 2.39E-27 | postive  |
| ZNF419    | AL512652.1 | 0.513541946  | 1.33E-37 | postive  |
| TUBE1     | AL512652.1 | 0.538749548  | 6.68E-42 | postive  |
| ALOX12    | AL512652.1 | 0.528368134  | 4.36E-40 | postive  |
| GABPB1    | AL512652.1 | 0.456859267  | 3.76E-29 | postive  |
| PHKG2     | AL512652.1 | 0.489290912  | 8.60E-34 | postive  |
| LINC00472 | AL512652.1 | 0.405180041  | 1.03E-22 | postive  |
| ATM       | AL512652.1 | 0.459193048  | 1.81E-29 | postive  |
| TAZ       | AL512652.1 | 0.566918163  | 3.72E-47 | postive  |
| FBXW7     | AL512652.1 | 0.42786228   | 2.11E-25 | postive  |
| HELLS     | PLCG1-AS1  | 0.52945124   | 2.84E-40 | postive  |
| ZNF419    | PLCG1-AS1  | 0.441674405  | 3.83E-27 | postive  |
| TUBE1     | PLCG1-AS1  | 0.520766535  | 8.49E-39 | postive  |
| ALOX12    | PLCG1-AS1  | 0.538766359  | 6.64E-42 | postive  |
| GABPB1    | PLCG1-AS1  | 0.557665888  | 2.25E-45 | postive  |
| LINC00472 | PLCG1-AS1  | 0.489207988  | 8.85E-34 | postive  |
| ATM       | PLCG1-AS1  | 0.623527777  | 2.15E-59 | postive  |
| FBXW7     | PLCG1-AS1  | 0.50865084   | 8.27E-37 | postive  |
| TUBE1     | AC009159.2 | 0.577797108  | 2.53E-49 | postive  |
| ALOX12    | AC009159.2 | 0.568217087  | 2.07E-47 | postive  |
| GABPB1    | AC009159.2 | 0.424305809  | 5.75E-25 | postive  |
| LINC00472 | AC009159.2 | 0.45301982   | 1.24E-28 | postive  |
| ATM       | AC009159.2 | 0.612815938  | 6.93E-57 | postive  |
| ISCU      | AC138305.1 | 0.586751001  | 3.60E-51 | postive  |
| ACSL3     | AC138305.1 | 0.501985884  | 9.50E-36 | postive  |
| VLDLR     | AC138305.1 | 0.415992655  | 5.72E-24 | postive  |
| KLHL24    | AC138305.1 | 0.6381611    | 5.58E-63 | postive  |
| ATG4D     | AC138305.1 | 0.430390638  | 1.03E-25 | postive  |
| GABARAPL1 | AC138305.1 | 0.617035377  | 7.32E-58 | postive  |
| WIPI2     | AC138305.1 | 0.40101577   | 3.06E-22 | postive  |
| LINC00472 | AC138305.1 | 0.521869242  | 5.54E-39 | postive  |
| LPIN1     | AC138305.1 | 0.639971342  | 1.95E-63 | postive  |
| FANCD2    | Z84485.1   | 0.434654016  | 3.01E-26 | postive  |
| HELLS     | Z84485.1   | 0.442674701  | 2.85E-27 | postive  |
| ZNF419    | Z84485.1   | 0.441886528  | 3.60E-27 | postive  |
| TUBE1     | Z84485.1   | 0.419212099  | 2.37E-24 | postive  |
| ALOX12    | Z84485.1   | 0.543131428  | 1.10E-42 | postive  |
| PHKG2     | Z84485.1   | 0.48418052   | 5.00E-33 | postive  |
| TAZ       | Z84485.1   | 0.501423909  | 1.16E-35 | postive  |
| SLC3A2    | AL031710.1 | 0.422063302  | 1.07E-24 | postive  |
| FH        | AL031710.1 | 0.513797509  | 1.21E-37 | postive  |
| ISCU      | AL031710.1 | 0.645123763  | 9.35E-65 | postive  |
| DDIT3     | AL031710.1 | 0.553805773  | 1.20E-44 | postive  |
| ATP5MC3   | AL031710.1 | 0.40764356   | 5.39E-23 | postive  |
| SLC2A8    | AL031710.1 | 0.507531829  | 1.25E-36 | postive  |
| SLC2A12   | AL031710.1 | 0.452107413  | 1.64E-28 | postive  |

|           |            |              |          |          |
|-----------|------------|--------------|----------|----------|
| GOT1      | AL031710.1 | 0.54198345   | 1.77E-42 | postive  |
| ATG4D     | AL031710.1 | 0.650402334  | 3.92E-66 | postive  |
| MAP1LC3A  | AL031710.1 | 0.64636358   | 4.47E-65 | postive  |
| GABARAPL2 | AL031710.1 | 0.601281666  | 2.72E-54 | postive  |
| GABARAPL1 | AL031710.1 | 0.606718979  | 1.68E-55 | postive  |
| WIPI2     | AL031710.1 | 0.479319688  | 2.60E-32 | postive  |
| LPIN1     | AL031710.1 | 0.448904637  | 4.37E-28 | postive  |
| ZNF419    | AL133367.1 | 0.542498204  | 1.43E-42 | postive  |
| TUBE1     | AL133367.1 | 0.430116765  | 1.11E-25 | postive  |
| SETD1B    | AL133367.1 | 0.467163041  | 1.43E-30 | postive  |
| ALOX12    | AL133367.1 | 0.582589147  | 2.64E-50 | postive  |
| TAZ       | AL133367.1 | 0.433156785  | 4.64E-26 | postive  |
| ATF4      | MAPKAPK5-, | 0.438039618  | 1.12E-26 | postive  |
| RPL8      | MAPKAPK5-, | 0.535614695  | 2.40E-41 | postive  |
| HRAS      | MAPKAPK5-, | 0.50954635   | 5.93E-37 | postive  |
| MAP1LC3A  | MAPKAPK5-, | 0.436705693  | 1.66E-26 | postive  |
| MAPK1     | MAPKAPK5-, | -0.434794768 | 2.89E-26 | negative |
| EGLN2     | MAPKAPK5-, | 0.518266997  | 2.22E-38 | postive  |
| TAZ       | MAPKAPK5-, | 0.400533206  | 3.47E-22 | postive  |
| HELLS     | FSIP2-AS1  | 0.455694148  | 5.41E-29 | postive  |
| ZNF419    | FSIP2-AS1  | 0.421037598  | 1.43E-24 | postive  |
| TUBE1     | FSIP2-AS1  | 0.603872894  | 7.26E-55 | postive  |
| ALOX12    | FSIP2-AS1  | 0.554617718  | 8.45E-45 | postive  |
| GABPB1    | FSIP2-AS1  | 0.468064829  | 1.07E-30 | postive  |
| ATM       | FSIP2-AS1  | 0.609507087  | 3.94E-56 | postive  |
| TAZ       | FSIP2-AS1  | 0.471140488  | 3.92E-31 | postive  |
| FBXW7     | FSIP2-AS1  | 0.484685841  | 4.21E-33 | postive  |
| HELLS     | AC026356.2 | 0.555768565  | 5.13E-45 | postive  |
| ZNF419    | AC026356.2 | 0.420297793  | 1.75E-24 | postive  |
| TUBE1     | AC026356.2 | 0.472111823  | 2.85E-31 | postive  |
| ALOX12    | AC026356.2 | 0.472137166  | 2.82E-31 | postive  |
| GABPB1    | AC026356.2 | 0.488996604  | 9.52E-34 | postive  |
| ATM       | AC026356.2 | 0.543794754  | 8.32E-43 | postive  |
| FBXW7     | AC026356.2 | 0.474183345  | 1.44E-31 | postive  |
| ZNF419    | AL136295.6 | 0.467047069  | 1.48E-30 | postive  |
| ALOX12    | AL136295.6 | 0.493167856  | 2.22E-34 | postive  |
| TFAP2C    | AL136295.6 | 0.460799403  | 1.09E-29 | postive  |
| HBA1      | AL136295.6 | 0.533053402  | 6.74E-41 | postive  |
| EGLN2     | AL136295.6 | 0.427630462  | 2.25E-25 | postive  |
| FANCD2    | AC022558.3 | 0.403003314  | 1.82E-22 | postive  |
| HELLS     | AC022558.3 | 0.483393427  | 6.54E-33 | postive  |
| ZNF419    | AC022558.3 | 0.511182336  | 3.22E-37 | postive  |
| TUBE1     | AC022558.3 | 0.495779818  | 8.80E-35 | postive  |
| ALOX12    | AC022558.3 | 0.554158923  | 1.03E-44 | postive  |
| GABPB1    | AC022558.3 | 0.539438148  | 5.04E-42 | postive  |
| LINC00472 | AC022558.3 | 0.67889836   | 4.54E-74 | postive  |
| LPIN1     | AC022558.3 | 0.417462374  | 3.83E-24 | postive  |
| ATM       | AC022558.3 | 0.509252798  | 6.61E-37 | postive  |
| FBXW7     | AC022558.3 | 0.475445879  | 9.47E-32 | postive  |
| HELLS     | AC009119.2 | 0.419207479  | 2.37E-24 | postive  |
| TUBE1     | AC009119.2 | 0.457079507  | 3.51E-29 | postive  |
| ALOX12    | AC009119.2 | 0.53296596   | 6.98E-41 | postive  |
| ATM       | AC009119.2 | 0.60944572   | 4.07E-56 | postive  |
| FBXW7     | AC009119.2 | 0.413223593  | 1.21E-23 | postive  |
| RB1       | AF127577.4 | 0.443737645  | 2.07E-27 | postive  |
| HELLS     | AF127577.4 | 0.438625188  | 9.43E-27 | postive  |
| ACSL3     | AF127577.4 | 0.401809878  | 2.49E-22 | postive  |
| OTUB1     | AF127577.4 | -0.413494887 | 1.13E-23 | negative |

|           |            |              |           |          |
|-----------|------------|--------------|-----------|----------|
| ZFP69B    | AF127577.4 | 0.459341706  | 1.73E-29  | postive  |
| IREB2     | AF127577.4 | 0.439650159  | 6.98E-27  | postive  |
| PIK3CA    | AF127577.4 | 0.417625904  | 3.66E-24  | postive  |
| NRAS      | AF127577.4 | 0.451017513  | 2.29E-28  | postive  |
| ATG5      | AF127577.4 | 0.427068956  | 2.64E-25  | postive  |
| MAPK8     | AF127577.4 | 0.419443563  | 2.22E-24  | postive  |
| PRKAA1    | AF127577.4 | 0.426996345  | 2.70E-25  | postive  |
| ATM       | AF127577.4 | 0.439658349  | 6.96E-27  | postive  |
| MTDH      | AF127577.4 | 0.45373434   | 9.93E-29  | postive  |
| BACH1     | AF127577.4 | 0.494247992  | 1.51E-34  | postive  |
| HELLS     | AC006159.1 | 0.435651717  | 2.25E-26  | postive  |
| KLHL24    | AC006159.1 | 0.442239354  | 3.24E-27  | postive  |
| GABPB1    | AC006159.1 | 0.504641597  | 3.62E-36  | postive  |
| PIK3CA    | AC006159.1 | 0.407347327  | 5.83E-23  | postive  |
| LINC00472 | AC006159.1 | 0.830264899  | 1.98E-138 | postive  |
| ATM       | AC006159.1 | 0.623878962  | 1.78E-59  | postive  |
| FBXW7     | AC006159.1 | 0.401016999  | 3.06E-22  | postive  |
| FANCD2    | ETV7-AS1   | 0.447672786  | 6.34E-28  | postive  |
| HELLS     | ETV7-AS1   | 0.432211583  | 6.09E-26  | postive  |
| ALOX12    | ETV7-AS1   | 0.425640199  | 3.95E-25  | postive  |
| ZNF419    | AC084824.5 | 0.495773285  | 8.82E-35  | postive  |
| TUBE1     | AC084824.5 | 0.522489771  | 4.36E-39  | postive  |
| ALOX12    | AC084824.5 | 0.443003694  | 2.58E-27  | postive  |
| GABPB1    | AC084824.5 | 0.431126834  | 8.32E-26  | postive  |
| NCOA4     | AC084824.5 | -0.409296881 | 3.47E-23  | negative |
| PHKG2     | AC084824.5 | 0.564219291  | 1.25E-46  | postive  |
| BECN1     | AC084824.5 | -0.40129162  | 2.85E-22  | negative |
| LINC00472 | AC084824.5 | 0.449370947  | 3.79E-28  | postive  |
| TAZ       | AC084824.5 | 0.668822134  | 3.66E-71  | postive  |
| FBXW7     | AC084824.5 | 0.422418083  | 9.74E-25  | postive  |
| HELLS     | AL008729.1 | 0.47904449   | 2.85E-32  | postive  |
| ZNF419    | AL008729.1 | 0.427326319  | 2.45E-25  | postive  |
| TUBE1     | AL008729.1 | 0.540295858  | 3.54E-42  | postive  |
| ALOX12    | AL008729.1 | 0.661162684  | 5.00E-69  | postive  |
| GABPB1    | AL008729.1 | 0.412439148  | 1.50E-23  | postive  |
| ATM       | AL008729.1 | 0.45924192   | 1.78E-29  | postive  |
| FBXW7     | AL008729.1 | 0.419679141  | 2.08E-24  | postive  |
| CHAC1     | AC018413.1 | 0.486853492  | 2.00E-33  | postive  |
| DDIT3     | AC018413.1 | 0.408090234  | 4.79E-23  | postive  |
| MAP1LC3A  | AC018413.1 | 0.490134962  | 6.41E-34  | postive  |
| KLHL24    | LINC00472  | 0.642490877  | 4.45E-64  | postive  |
| IREB2     | LINC00472  | 0.490041763  | 6.62E-34  | postive  |
| GABPB1    | LINC00472  | 0.501292726  | 1.22E-35  | postive  |
| PIK3CA    | LINC00472  | 0.536295849  | 1.82E-41  | postive  |
| KRAS      | LINC00472  | 0.461858254  | 7.80E-30  | postive  |
| MAPK8     | LINC00472  | 0.431025732  | 8.56E-26  | postive  |
| LINC00472 | LINC00472  | 1            | 0         | postive  |
| PRKAA1    | LINC00472  | 0.433325778  | 4.42E-26  | postive  |
| LPIN1     | LINC00472  | 0.443954026  | 1.94E-27  | postive  |
| ATM       | LINC00472  | 0.514102342  | 1.08E-37  | postive  |
| HSPB1     | LINC02846  | 0.425072516  | 4.63E-25  | postive  |
| HRAS      | LINC02846  | 0.417461963  | 3.83E-24  | postive  |
| PHKG2     | LINC02846  | 0.420149688  | 1.83E-24  | postive  |
| TAZ       | LINC02846  | 0.408142867  | 4.72E-23  | postive  |
| PHKG2     | AL078604.2 | 0.445325295  | 1.29E-27  | postive  |
| HELLS     | AC011815.1 | 0.456378989  | 4.37E-29  | postive  |
| ZNF419    | AC011815.1 | 0.464028026  | 3.91E-30  | postive  |
| KLHL24    | AC011815.1 | 0.567025147  | 3.54E-47  | postive  |

|           |            |             |           |         |
|-----------|------------|-------------|-----------|---------|
| TUBE1     | AC011815.1 | 0.403343493 | 1.67E-22  | postive |
| IREB2     | AC011815.1 | 0.531625661 | 1.19E-40  | postive |
| GABPB1    | AC011815.1 | 0.58942931  | 9.83E-52  | postive |
| PIK3CA    | AC011815.1 | 0.483112553 | 7.20E-33  | postive |
| KRAS      | AC011815.1 | 0.426681941 | 2.95E-25  | postive |
| ATG7      | AC011815.1 | 0.400799746 | 3.23E-22  | postive |
| MAPK8     | AC011815.1 | 0.45587889  | 5.11E-29  | postive |
| LINC00472 | AC011815.1 | 0.778052293 | 1.67E-110 | postive |
| PRKAA1    | AC011815.1 | 0.435380591 | 2.44E-26  | postive |
| LPIN1     | AC011815.1 | 0.48526764  | 3.45E-33  | postive |
| ATM       | AC011815.1 | 0.626831701 | 3.47E-60  | postive |
| FBXW7     | AC011815.1 | 0.474023299 | 1.52E-31  | postive |
| HELLS     | MIR29B2CHG | 0.503762589 | 4.98E-36  | postive |
| ZNF419    | MIR29B2CHG | 0.412030068 | 1.67E-23  | postive |
| TUBE1     | MIR29B2CHG | 0.471017138 | 4.08E-31  | postive |
| ALOX12    | MIR29B2CHG | 0.496000688 | 8.14E-35  | postive |
| GABPB1    | MIR29B2CHG | 0.570037072 | 9.06E-48  | postive |
| ATG7      | MIR29B2CHG | 0.439386086 | 7.54E-27  | postive |
| MAPK8     | MIR29B2CHG | 0.413585414 | 1.10E-23  | postive |
| LINC00472 | MIR29B2CHG | 0.69144634  | 7.39E-78  | postive |
| ATM       | MIR29B2CHG | 0.728165497 | 3.77E-90  | postive |
| FBXW7     | MIR29B2CHG | 0.490503979 | 5.63E-34  | postive |
| ZNF419    | AC020915.2 | 0.471459856 | 3.53E-31  | postive |
| ALOX12    | AC020915.2 | 0.400533597 | 3.46E-22  | postive |
| ATM       | AC020915.2 | 0.421565812 | 1.23E-24  | postive |
| HELLS     | AL158834.2 | 0.429401429 | 1.36E-25  | postive |
| ZNF419    | AL158834.2 | 0.491339473 | 4.21E-34  | postive |
| TUBE1     | AL158834.2 | 0.616937765 | 7.71E-58  | postive |
| ALOX12    | AL158834.2 | 0.58298945  | 2.18E-50  | postive |
| GABPB1    | AL158834.2 | 0.491535456 | 3.93E-34  | postive |
| PHKG2     | AL158834.2 | 0.440295045 | 5.77E-27  | postive |
| ATM       | AL158834.2 | 0.507175075 | 1.43E-36  | postive |
| TAZ       | AL158834.2 | 0.548849892 | 9.96E-44  | postive |
| FBXW7     | AL158834.2 | 0.477665026 | 4.52E-32  | postive |
| RPL8      | FOXN3-AS1  | 0.401765855 | 2.52E-22  | postive |
| HRAS      | FOXN3-AS1  | 0.409336983 | 3.44E-23  | postive |
| GPX4      | SPINT1-AS1 | 0.491789021 | 3.60E-34  | postive |
| CISD1     | SPINT1-AS1 | 0.413988778 | 9.85E-24  | postive |
| FH        | SPINT1-AS1 | 0.448439562 | 5.03E-28  | postive |
| ISCU      | SPINT1-AS1 | 0.44008854  | 6.13E-27  | postive |
| OTUB1     | SPINT1-AS1 | 0.46112025  | 9.86E-30  | postive |
| ATP5MC3   | SPINT1-AS1 | 0.449725434 | 3.40E-28  | postive |
| SLC2A8    | SPINT1-AS1 | 0.440051494 | 6.20E-27  | postive |
| GOT1      | SPINT1-AS1 | 0.465298472 | 2.60E-30  | postive |
| ATG4D     | SPINT1-AS1 | 0.533313974 | 6.07E-41  | postive |
| MAP1LC3A  | SPINT1-AS1 | 0.444304521 | 1.75E-27  | postive |
| GABARAPL2 | SPINT1-AS1 | 0.600201574 | 4.70E-54  | postive |
| HELLS     | AC007991.2 | 0.491735748 | 3.66E-34  | postive |
| TUBE1     | AC007991.2 | 0.449140268 | 4.06E-28  | postive |
| ALOX12    | AC007991.2 | 0.459141705 | 1.84E-29  | postive |
| GABPB1    | AC007991.2 | 0.468519005 | 9.20E-31  | postive |
| LINC00472 | AC007991.2 | 0.409452137 | 3.33E-23  | postive |
| ATM       | AC007991.2 | 0.671196597 | 7.75E-72  | postive |
| FBXW7     | AC007991.2 | 0.466588748 | 1.72E-30  | postive |
| ISCU      | AC104958.2 | 0.60341821  | 9.17E-55  | postive |
| DDIT3     | AC104958.2 | 0.415386617 | 6.74E-24  | postive |
| ATG4D     | AC104958.2 | 0.432307537 | 5.92E-26  | postive |
| MAP1LC3A  | AC104958.2 | 0.40251227  | 2.07E-22  | postive |



|           |            |              |           |          |
|-----------|------------|--------------|-----------|----------|
| GABARAPL1 | AC104958.2 | 0.508229438  | 9.66E-37  | postive  |
| HELLS     | AC010615.2 | 0.479753829  | 2.24E-32  | postive  |
| ZNF419    | AC010615.2 | 0.400900062  | 3.15E-22  | postive  |
| KLHL24    | AC010615.2 | 0.494198697  | 1.54E-34  | postive  |
| IREB2     | AC010615.2 | 0.404391966  | 1.27E-22  | postive  |
| PIK3CA    | AC010615.2 | 0.417758964  | 3.53E-24  | postive  |
| LINC00472 | AC010615.2 | 0.600042924  | 5.09E-54  | postive  |
| ATM       | AC010615.2 | 0.472200302  | 2.77E-31  | postive  |
| FANCD2    | AC025048.2 | 0.401503973  | 2.69E-22  | postive  |
| STMN1     | AC025048.2 | 0.533687974  | 5.22E-41  | postive  |
| CDKN2A    | AC025048.2 | 0.56124469   | 4.67E-46  | postive  |
| HELLS     | AC109587.1 | 0.497335113  | 5.06E-35  | postive  |
| ZNF419    | AC109587.1 | 0.481422612  | 1.28E-32  | postive  |
| KLHL24    | AC109587.1 | 0.456418364  | 4.32E-29  | postive  |
| TUBE1     | AC109587.1 | 0.571491941  | 4.67E-48  | postive  |
| ALOX12    | AC109587.1 | 0.406844039  | 6.66E-23  | postive  |
| GABPB1    | AC109587.1 | 0.677437875  | 1.22E-73  | postive  |
| PIK3CA    | AC109587.1 | 0.411133574  | 2.13E-23  | postive  |
| KRAS      | AC109587.1 | 0.402031428  | 2.35E-22  | postive  |
| MAPK8     | AC109587.1 | 0.425504685  | 4.10E-25  | postive  |
| LINC00472 | AC109587.1 | 0.783532226  | 4.62E-113 | postive  |
| ATM       | AC109587.1 | 0.631718708  | 2.24E-61  | postive  |
| FBXW7     | AC109587.1 | 0.557082599  | 2.90E-45  | postive  |
| HELLS     | AL080317.2 | 0.524589045  | 1.93E-39  | postive  |
| TUBE1     | AL080317.2 | 0.60590266   | 2.56E-55  | postive  |
| ALOX12    | AL080317.2 | 0.512912339  | 1.69E-37  | postive  |
| GABPB1    | AL080317.2 | 0.453047636  | 1.23E-28  | postive  |
| LINC00472 | AL080317.2 | 0.452664621  | 1.38E-28  | postive  |
| ATM       | AL080317.2 | 0.612839237  | 6.84E-57  | postive  |
| FBXW7     | AL080317.2 | 0.431323296  | 7.86E-26  | postive  |
| TFAP2C    | LINC01976  | 0.453360768  | 1.11E-28  | postive  |
| HBA1      | LINC01976  | 0.8063365    | 1.42E-124 | postive  |
| HRAS      | LINC01976  | 0.449923728  | 3.20E-28  | postive  |
| EGLN2     | LINC01976  | 0.622509528  | 3.77E-59  | postive  |
| CD44      | LINC01615  | 0.494040495  | 1.63E-34  | postive  |
| AURKA     | LINC01615  | 0.410877241  | 2.28E-23  | postive  |
| KLHL24    | LINC00513  | 0.560736981  | 5.85E-46  | postive  |
| IREB2     | LINC00513  | 0.414801362  | 7.90E-24  | postive  |
| GABPB1    | LINC00513  | 0.479816499  | 2.20E-32  | postive  |
| PIK3CA    | LINC00513  | 0.460241316  | 1.30E-29  | postive  |
| LINC00472 | LINC00513  | 0.921631903  | 6.51E-223 | postive  |
| ATM       | LINC00513  | 0.457477739  | 3.10E-29  | postive  |
| GABPB1    | AP000240.1 | 0.407829828  | 5.13E-23  | postive  |
| NOX1      | AP000240.1 | 0.401612124  | 2.62E-22  | postive  |
| BECN1     | AP000240.1 | -0.459111902 | 1.86E-29  | negative |
| LINC00472 | AP000240.1 | 0.422791188  | 8.78E-25  | postive  |
| FBXW7     | AP000240.1 | 0.452069828  | 1.66E-28  | postive  |
| FANCD2    | HCG25      | 0.466916309  | 1.55E-30  | postive  |
| HELLS     | HCG25      | 0.437760457  | 1.22E-26  | postive  |
| ALOX12    | HCG25      | 0.583941629  | 1.39E-50  | postive  |
| TFAP2C    | HCG25      | 0.441583678  | 3.94E-27  | postive  |
| DUOX1     | HCG25      | 0.429762135  | 1.23E-25  | postive  |
| GPX4      | ZSCAN16-AS | 0.452374875  | 1.51E-28  | postive  |
| HSPB1     | ZSCAN16-AS | 0.451627664  | 1.90E-28  | postive  |
| RPL8      | ZSCAN16-AS | 0.456304158  | 4.47E-29  | postive  |
| HBA1      | ZSCAN16-AS | 0.605981963  | 2.46E-55  | postive  |
| HRAS      | ZSCAN16-AS | 0.733345559  | 4.77E-92  | postive  |
| MAP1LC3A  | ZSCAN16-AS | 0.503414656  | 5.66E-36  | postive  |

|           |            |              |           |          |
|-----------|------------|--------------|-----------|----------|
| EGLN2     | ZSCAN16-AS | 0.814326074  | 5.63E-129 | postive  |
| ATM       | LINC00649  | 0.411235391  | 2.07E-23  | postive  |
| HELLS     | AC011377.1 | 0.53616242   | 1.92E-41  | postive  |
| TUBE1     | AC011377.1 | 0.422415622  | 9.74E-25  | postive  |
| ALOX12    | AC011377.1 | 0.529589937  | 2.69E-40  | postive  |
| ATM       | AC011377.1 | 0.507586978  | 1.23E-36  | postive  |
| FBXW7     | AC011377.1 | 0.401293773  | 2.85E-22  | postive  |
| HELLS     | AC016747.3 | 0.526209215  | 1.02E-39  | postive  |
| ZNF419    | AC016747.3 | 0.434570103  | 3.08E-26  | postive  |
| TUBE1     | AC016747.3 | 0.527769538  | 5.52E-40  | postive  |
| ALOX12    | AC016747.3 | 0.522743197  | 3.95E-39  | postive  |
| GABPB1    | AC016747.3 | 0.588923759  | 1.26E-51  | postive  |
| MAPK8     | AC016747.3 | 0.440813301  | 4.95E-27  | postive  |
| LINC00472 | AC016747.3 | 0.754394212  | 3.06E-100 | postive  |
| ATM       | AC016747.3 | 0.755982085  | 6.82E-101 | postive  |
| FBXW7     | AC016747.3 | 0.531289101  | 1.37E-40  | postive  |
| ZNF419    | MIR3936HG  | 0.456274525  | 4.52E-29  | postive  |
| VEGFA     | MIR3936HG  | 0.431300031  | 7.91E-26  | postive  |
| TUBE1     | MIR3936HG  | 0.614072009  | 3.56E-57  | postive  |
| ALOX12    | MIR3936HG  | 0.657374897  | 5.39E-68  | postive  |
| ATM       | MIR3936HG  | 0.507508105  | 1.26E-36  | postive  |
| TAZ       | MIR3936HG  | 0.492890271  | 2.44E-34  | postive  |
| MAPK1     | EGOT       | 0.413411268  | 1.15E-23  | postive  |
| MAPK8     | EGOT       | 0.479394756  | 2.53E-32  | postive  |
| PRKAA2    | EGOT       | 0.406545763  | 7.20E-23  | postive  |
| ATM       | EGOT       | 0.425953348  | 3.62E-25  | postive  |
| SIRT1     | EGOT       | 0.413782305  | 1.04E-23  | postive  |
| ZNF419    | AC034236.2 | 0.52005303   | 1.12E-38  | postive  |
| TUBE1     | AC034236.2 | 0.461835026  | 7.86E-30  | postive  |
| DRD4      | AC034236.2 | 0.460955415  | 1.04E-29  | postive  |
| ALOX12    | AC034236.2 | 0.47989334   | 2.14E-32  | postive  |
| NRAS      | AC034236.2 | -0.412302553 | 1.55E-23  | negative |
| PHKG2     | AC034236.2 | 0.659993999  | 1.04E-68  | postive  |
| TAZ       | AC034236.2 | 0.715887872  | 8.01E-86  | postive  |
| AKR1C1    | AC007036.1 | 0.428930441  | 1.56E-25  | postive  |
| ZNF419    | AC048341.2 | 0.511889558  | 2.48E-37  | postive  |
| TUBE1     | AC048341.2 | 0.416429023  | 5.07E-24  | postive  |
| ALOX12    | AC048341.2 | 0.409018823  | 3.74E-23  | postive  |
| PHKG2     | AC048341.2 | 0.655306548  | 1.94E-67  | postive  |
| SAT1      | AC048341.2 | 0.409591415  | 3.21E-23  | postive  |
| SOCS1     | AC048341.2 | 0.428582765  | 1.72E-25  | postive  |
| TAZ       | AC048341.2 | 0.683241538  | 2.33E-75  | postive  |
| ALOX12    | SLC6A12-AS | 0.499985297  | 1.96E-35  | postive  |
| HELLS     | AC032044.1 | 0.526101019  | 1.06E-39  | postive  |
| ZNF419    | AC032044.1 | 0.419420759  | 2.23E-24  | postive  |
| TUBE1     | AC032044.1 | 0.465256648  | 2.64E-30  | postive  |
| ALOX12    | AC032044.1 | 0.583247133  | 1.93E-50  | postive  |
| GABPB1    | AC032044.1 | 0.498514814  | 3.32E-35  | postive  |
| LINC00472 | AC032044.1 | 0.480131422  | 1.98E-32  | postive  |
| ATM       | AC032044.1 | 0.660331578  | 8.44E-69  | postive  |
| FBXW7     | AC032044.1 | 0.492958554  | 2.38E-34  | postive  |
| FANCD2    | AP001107.1 | 0.416164793  | 5.45E-24  | postive  |
| HELLS     | AP001107.1 | 0.434337874  | 3.30E-26  | postive  |
| ZNF419    | AP001107.1 | 0.447432528  | 6.82E-28  | postive  |
| TUBE1     | AP001107.1 | 0.437233113  | 1.42E-26  | postive  |
| ALOX12    | AP001107.1 | 0.637163354  | 9.94E-63  | postive  |
| TFAP2C    | AP001107.1 | 0.435952115  | 2.06E-26  | postive  |
| HBA1      | AP001107.1 | 0.406113299  | 8.07E-23  | postive  |

|           |            |             |           |         |
|-----------|------------|-------------|-----------|---------|
| DUOX1     | AP001107.1 | 0.425153135 | 4.53E-25  | postive |
| FBXW7     | AP001107.1 | 0.403401035 | 1.64E-22  | postive |
| ZNF419    | LINC01786  | 0.41249972  | 1.47E-23  | postive |
| TUBE1     | LINC01786  | 0.42417609  | 5.96E-25  | postive |
| ALOX12    | LINC01786  | 0.634330804 | 5.06E-62  | postive |
| PHKG2     | LINC01786  | 0.409089275 | 3.67E-23  | postive |
| TAZ       | LINC01786  | 0.561302473 | 4.55E-46  | postive |
| HBA1      | ARHGAP29-1 | 0.426433662 | 3.16E-25  | postive |
| EGLN2     | ARHGAP29-1 | 0.406894728 | 6.57E-23  | postive |
| ATM       | AL157395.1 | 0.435765589 | 2.18E-26  | postive |
| HELLS     | AL138963.1 | 0.555398122 | 6.03E-45  | postive |
| TUBE1     | AL138963.1 | 0.431399783 | 7.69E-26  | postive |
| ALOX12    | AL138963.1 | 0.449462445 | 3.68E-28  | postive |
| GABPB1    | AL138963.1 | 0.550860976 | 4.24E-44  | postive |
| ATG7      | AL138963.1 | 0.437127396 | 1.46E-26  | postive |
| LINC00472 | AL138963.1 | 0.73100618  | 3.48E-91  | postive |
| ATM       | AL138963.1 | 0.708192237 | 3.17E-83  | postive |
| FBXW7     | AL138963.1 | 0.465343718 | 2.56E-30  | postive |
| ALOX12    | DIP2C-AS1  | 0.424809197 | 4.99E-25  | postive |
| MAPK8     | DIP2C-AS1  | 0.408428919 | 4.37E-23  | postive |
| ATM       | DIP2C-AS1  | 0.550042012 | 6.00E-44  | postive |
| HELLS     | AC068790.6 | 0.517670664 | 2.78E-38  | postive |
| KLHL24    | AC068790.6 | 0.426016733 | 3.55E-25  | postive |
| TUBE1     | AC068790.6 | 0.443464297 | 2.25E-27  | postive |
| ALOX12    | AC068790.6 | 0.416284956 | 5.28E-24  | postive |
| IREB2     | AC068790.6 | 0.421420951 | 1.28E-24  | postive |
| GABPB1    | AC068790.6 | 0.574987634 | 9.34E-49  | postive |
| PIK3CA    | AC068790.6 | 0.423020966 | 8.23E-25  | postive |
| ATG7      | AC068790.6 | 0.418251596 | 3.08E-24  | postive |
| MAPK8     | AC068790.6 | 0.44334521  | 2.33E-27  | postive |
| LINC00472 | AC068790.6 | 0.790179243 | 2.87E-116 | postive |
| ATM       | AC068790.6 | 0.731971766 | 1.54E-91  | postive |
| FBXW7     | AC068790.6 | 0.485810305 | 2.86E-33  | postive |
| HELLS     | AC026356.1 | 0.542348992 | 1.52E-42  | postive |
| GABPB1    | AC026356.1 | 0.516011147 | 5.23E-38  | postive |
| LINC00472 | AC026356.1 | 0.515815122 | 5.64E-38  | postive |
| ATM       | AC026356.1 | 0.596708747 | 2.72E-53  | postive |
| BACH1     | AC026356.1 | 0.427916309 | 2.08E-25  | postive |
| MTOR      | AC008764.2 | 0.445782936 | 1.12E-27  | postive |
| ZNF419    | AC008764.2 | 0.477362422 | 5.00E-32  | postive |
| TUBE1     | AC008764.2 | 0.430576288 | 9.74E-26  | postive |
| SETD1B    | AC008764.2 | 0.560327915 | 7.00E-46  | postive |
| ALOX12    | AC008764.2 | 0.488690519 | 1.06E-33  | postive |
| IREB2     | AC008764.2 | 0.449993022 | 3.13E-28  | postive |
| ULK2      | AC008764.2 | 0.404056128 | 1.39E-22  | postive |
| LPIN1     | AC008764.2 | 0.40985892  | 2.99E-23  | postive |
| ATM       | AC008764.2 | 0.455438363 | 5.86E-29  | postive |
| HELLS     | AC018926.2 | 0.522392342 | 4.53E-39  | postive |
| ZNF419    | AC018926.2 | 0.420240402 | 1.78E-24  | postive |
| TUBE1     | AC018926.2 | 0.452203432 | 1.59E-28  | postive |
| ALOX12    | AC018926.2 | 0.410159776 | 2.76E-23  | postive |
| GABPB1    | AC018926.2 | 0.511158082 | 3.25E-37  | postive |
| PHKG2     | AC018926.2 | 0.403204182 | 1.73E-22  | postive |
| LINC00472 | AC018926.2 | 0.518996404 | 1.68E-38  | postive |
| ATM       | AC018926.2 | 0.507636659 | 1.20E-36  | postive |
| TAZ       | AC018926.2 | 0.411649577 | 1.85E-23  | postive |
| FBXW7     | AC018926.2 | 0.468714861 | 8.63E-31  | postive |
| ATG4D     | WWTR1-AS1  | 0.494130511 | 1.58E-34  | postive |

|           |             |             |           |         |
|-----------|-------------|-------------|-----------|---------|
| TUBE1     | CNNM3-DT    | 0.409715587 | 3.11E-23  | postive |
| PEBP1     | CNNM3-DT    | 0.457572032 | 3.01E-29  | postive |
| ZEB1      | AC068870.2  | 0.409228734 | 3.54E-23  | postive |
| EPAS1     | AC068870.2  | 0.484183929 | 4.99E-33  | postive |
| HELLS     | AC010999.1  | 0.474846288 | 1.16E-31  | postive |
| ZNF419    | AC010999.1  | 0.506307838 | 1.96E-36  | postive |
| TUBE1     | AC010999.1  | 0.573179223 | 2.15E-48  | postive |
| ALOX12    | AC010999.1  | 0.542975979 | 1.17E-42  | postive |
| GABPB1    | AC010999.1  | 0.56409853  | 1.32E-46  | postive |
| LINC00472 | AC010999.1  | 0.597205859 | 2.12E-53  | postive |
| ATM       | AC010999.1  | 0.599341209 | 7.26E-54  | postive |
| FBXW7     | AC010999.1  | 0.452133706 | 1.63E-28  | postive |
| ZNF419    | INTS6-AS1   | 0.551900591 | 2.72E-44  | postive |
| VEGFA     | INTS6-AS1   | 0.418151401 | 3.17E-24  | postive |
| TUBE1     | INTS6-AS1   | 0.559172221 | 1.16E-45  | postive |
| ALOX12    | INTS6-AS1   | 0.718947916 | 7.02E-87  | postive |
| GABPB1    | INTS6-AS1   | 0.421672324 | 1.20E-24  | postive |
| ATM       | INTS6-AS1   | 0.426505193 | 3.10E-25  | postive |
| TAZ       | INTS6-AS1   | 0.481846351 | 1.11E-32  | postive |
| ALOX12    | NBR2        | 0.56810749  | 2.17E-47  | postive |
| PHKG2     | NBR2        | 0.409909306 | 2.95E-23  | postive |
| TAZ       | NBR2        | 0.406216752 | 7.85E-23  | postive |
| SRC       | PICART1     | 0.466010592 | 2.07E-30  | postive |
| PHKG2     | PICART1     | 0.500583965 | 1.58E-35  | postive |
| TAZ       | PICART1     | 0.480893028 | 1.53E-32  | postive |
| TAZ       | AL158071.2  | 0.408366453 | 4.45E-23  | postive |
| ZFP69B    | AL031985.3  | 0.7680062   | 5.38E-106 | postive |
| ATM       | AC009166.1  | 0.405109344 | 1.05E-22  | postive |
| HELLS     | AC011510.1  | 0.512008605 | 2.37E-37  | postive |
| TUBE1     | AC011510.1  | 0.457338891 | 3.24E-29  | postive |
| ALOX12    | AC011510.1  | 0.470806433 | 4.37E-31  | postive |
| GABPB1    | AC011510.1  | 0.515783753 | 5.71E-38  | postive |
| ATG7      | AC011510.1  | 0.407052217 | 6.30E-23  | postive |
| LINC00472 | AC011510.1  | 0.504310719 | 4.08E-36  | postive |
| ATM       | AC011510.1  | 0.660836286 | 6.14E-69  | postive |
| FBXW7     | AC011510.1  | 0.503586013 | 5.31E-36  | postive |
| SLC3A2    | Z82185.1    | 0.469253519 | 7.25E-31  | postive |
| FH        | Z82185.1    | 0.515484934 | 6.39E-38  | postive |
| ISCU      | Z82185.1    | 0.656920037 | 7.15E-68  | postive |
| DDIT3     | Z82185.1    | 0.431251102 | 8.02E-26  | postive |
| SLC2A8    | Z82185.1    | 0.423101175 | 8.05E-25  | postive |
| SLC2A12   | Z82185.1    | 0.406855236 | 6.64E-23  | postive |
| CS        | Z82185.1    | 0.476116376 | 7.58E-32  | postive |
| GOT1      | Z82185.1    | 0.49031224  | 6.02E-34  | postive |
| ATG4D     | Z82185.1    | 0.634129954 | 5.68E-62  | postive |
| GABARAPL2 | Z82185.1    | 0.513415645 | 1.40E-37  | postive |
| GABARAPL1 | Z82185.1    | 0.696709824 | 1.67E-79  | postive |
| LPIN1     | Z82185.1    | 0.525589143 | 1.30E-39  | postive |
| ATF4      | EPB41L4A-A' | 0.443161479 | 2.46E-27  | postive |
| RPL8      | EPB41L4A-A' | 0.468336291 | 9.76E-31  | postive |
| ARNTL     | AC079921.2  | 0.408608659 | 4.17E-23  | postive |
| ZNF419    | AC079921.2  | 0.448659473 | 4.70E-28  | postive |
| TUBE1     | AC079921.2  | 0.513075098 | 1.59E-37  | postive |
| SETD1B    | AC079921.2  | 0.451179811 | 2.18E-28  | postive |
| ALOX12    | AC079921.2  | 0.554113465 | 1.05E-44  | postive |
| GABPB1    | AC079921.2  | 0.538772165 | 6.62E-42  | postive |
| ZEB1      | AC079921.2  | 0.542177108 | 1.63E-42  | postive |
| MAPK8     | AC079921.2  | 0.474133592 | 1.46E-31  | postive |

|           |             |              |           |          |
|-----------|-------------|--------------|-----------|----------|
| ATM       | AC079921.2  | 0.65496      | 2.41E-67  | postive  |
| YY1AP1    | AC079921.2  | 0.448002037  | 5.74E-28  | postive  |
| FBXW7     | AC079921.2  | 0.527241588  | 6.80E-40  | postive  |
| PHKG2     | AL590560.3  | 0.508680342  | 8.18E-37  | postive  |
| TAZ       | AL590560.3  | 0.603290954  | 9.78E-55  | postive  |
| RGS4      | AC010247.2  | 0.674712901  | 7.56E-73  | postive  |
| ACSL3     | AC087071.2  | 0.454977966  | 6.76E-29  | postive  |
| KLHL24    | AC087071.2  | 0.627495649  | 2.40E-60  | postive  |
| IREB2     | AC087071.2  | 0.521468753  | 6.47E-39  | postive  |
| GABPB1    | AC087071.2  | 0.468883756  | 8.17E-31  | postive  |
| PIK3CA    | AC087071.2  | 0.543478006  | 9.50E-43  | postive  |
| KRAS      | AC087071.2  | 0.507631201  | 1.21E-36  | postive  |
| MAPK8     | AC087071.2  | 0.417760963  | 3.53E-24  | postive  |
| LINC00472 | AC087071.2  | 0.849272947  | 4.38E-151 | postive  |
| PRKAA1    | AC087071.2  | 0.459521711  | 1.63E-29  | postive  |
| TGFBR1    | AC087071.2  | 0.426239391  | 3.34E-25  | postive  |
| LPIN1     | AC087071.2  | 0.459795922  | 1.50E-29  | postive  |
| ATM       | AC087071.2  | 0.47047262   | 4.87E-31  | postive  |
| NOX1      | AC010969.2  | 0.495040262  | 1.14E-34  | postive  |
| HRAS      | AC010969.2  | 0.563181944  | 1.98E-46  | postive  |
| PHKG2     | AC010969.2  | 0.460368842  | 1.25E-29  | postive  |
| BECN1     | AC010969.2  | -0.439639804 | 7.00E-27  | negative |
| EGLN2     | AC010969.2  | 0.456954806  | 3.65E-29  | postive  |
| TAZ       | AC010969.2  | 0.422600885  | 9.25E-25  | postive  |
| MUC1      | AC023669.1  | 0.421334202  | 1.32E-24  | postive  |
| SLC7A5    | AC023669.1  | 0.452733673  | 1.35E-28  | postive  |
| SLC2A1    | AC023669.1  | 0.46929412   | 7.15E-31  | postive  |
| HELLS     | AC009318.2  | 0.505845469  | 2.33E-36  | postive  |
| GABPB1    | AC009318.2  | 0.440123884  | 6.07E-27  | postive  |
| TGFBR1    | AC009318.2  | 0.416398117  | 5.12E-24  | postive  |
| ATM       | AC009318.2  | 0.505426479  | 2.71E-36  | postive  |
| FBXW7     | AC009318.2  | 0.448434817  | 5.04E-28  | postive  |
| BACH1     | AC009318.2  | 0.443266569  | 2.39E-27  | postive  |
| ALB       | LINC01780   | 0.403035389  | 1.81E-22  | postive  |
| PCK2      | LINC01780   | 0.476891707  | 5.86E-32  | postive  |
| AGPAT3    | CCDC183-AS1 | 0.442065681  | 3.41E-27  | postive  |
| MIOX      | CCDC183-AS1 | 0.428062993  | 1.99E-25  | postive  |
| TFAP2C    | AC009090.1  | 0.553051391  | 1.66E-44  | postive  |
| HBA1      | AC009090.1  | 0.654201637  | 3.85E-67  | postive  |
| DUOX1     | AC009090.1  | 0.40124773   | 2.88E-22  | postive  |
| EGLN2     | AC009090.1  | 0.410093233  | 2.81E-23  | postive  |
| SLC3A2    | AP000757.2  | 0.430621102  | 9.61E-26  | postive  |
| ISCU      | AP000757.2  | 0.497774572  | 4.32E-35  | postive  |
| DDIT3     | AP000757.2  | 0.49157569   | 3.87E-34  | postive  |
| PHKG2     | AP000757.2  | 0.412962406  | 1.30E-23  | postive  |
| ATG4D     | AP000757.2  | 0.586781229  | 3.55E-51  | postive  |
| GABARAPL1 | AP000757.2  | 0.456564641  | 4.13E-29  | postive  |
| BRD4      | LINC01278   | 0.469136997  | 7.53E-31  | postive  |
| SETD1B    | LINC01278   | 0.553408232  | 1.42E-44  | postive  |
| ALOX12    | LINC01278   | 0.476141564  | 7.52E-32  | postive  |
| YY1AP1    | LINC01278   | 0.445437005  | 1.25E-27  | postive  |
| HELLS     | AP001893.1  | 0.459433778  | 1.68E-29  | postive  |
| ZNF419    | AP001893.1  | 0.447446438  | 6.79E-28  | postive  |
| TUBE1     | AP001893.1  | 0.586992117  | 3.20E-51  | postive  |
| SETD1B    | AP001893.1  | 0.408813285  | 3.95E-23  | postive  |
| ALOX12    | AP001893.1  | 0.588716718  | 1.39E-51  | postive  |
| IREB2     | AP001893.1  | 0.503787077  | 4.94E-36  | postive  |
| GABPB1    | AP001893.1  | 0.569244475  | 1.30E-47  | postive  |

|           |            |              |           |          |
|-----------|------------|--------------|-----------|----------|
| PIK3CA    | AP001893.1 | 0.42746844   | 2.36E-25  | postive  |
| MAPK8     | AP001893.1 | 0.562993884  | 2.15E-46  | postive  |
| LINC00472 | AP001893.1 | 0.668406336  | 4.80E-71  | postive  |
| ATM       | AP001893.1 | 0.758215325  | 8.11E-102 | postive  |
| FBXW7     | AP001893.1 | 0.462798839  | 5.78E-30  | postive  |
| ZNF419    | GRPEL2-AS1 | 0.497772087  | 4.33E-35  | postive  |
| VEGFA     | GRPEL2-AS1 | 0.449474329  | 3.67E-28  | postive  |
| TUBE1     | GRPEL2-AS1 | 0.432641291  | 5.38E-26  | postive  |
| SETD1B    | GRPEL2-AS1 | 0.428403761  | 1.81E-25  | postive  |
| ALOX12    | GRPEL2-AS1 | 0.428938801  | 1.55E-25  | postive  |
| GABPB1    | GRPEL2-AS1 | 0.433825891  | 3.82E-26  | postive  |
| ZEB1      | GRPEL2-AS1 | 0.510288158  | 4.50E-37  | postive  |
| FBXW7     | GRPEL2-AS1 | 0.433847546  | 3.80E-26  | postive  |
| HELLS     | AC006504.7 | 0.423446837  | 7.31E-25  | postive  |
| KLHL24    | AC006504.7 | 0.425372     | 4.26E-25  | postive  |
| LINC00472 | AC006504.7 | 0.553252537  | 1.52E-44  | postive  |
| ALOX12    | C1orf229   | 0.519187605  | 1.56E-38  | postive  |
| HELLS     | LINC00662  | 0.483570747  | 6.16E-33  | postive  |
| HELLS     | AC105339.3 | 0.588963365  | 1.23E-51  | postive  |
| ZNF419    | AC105339.3 | 0.424381468  | 5.63E-25  | postive  |
| TUBE1     | AC105339.3 | 0.510114447  | 4.80E-37  | postive  |
| ALOX12    | AC105339.3 | 0.617590372  | 5.43E-58  | postive  |
| GABPB1    | AC105339.3 | 0.54508825   | 4.85E-43  | postive  |
| LINC00472 | AC105339.3 | 0.57394595   | 1.51E-48  | postive  |
| ATM       | AC105339.3 | 0.707510291  | 5.33E-83  | postive  |
| FBXW7     | AC105339.3 | 0.493615231  | 1.89E-34  | postive  |
| TUBE1     | TNFRSF14-A | 0.431382064  | 7.73E-26  | postive  |
| ALOX12    | TNFRSF14-A | 0.451175078  | 2.18E-28  | postive  |
| ATG4D     | TNFRSF14-A | 0.433464806  | 4.24E-26  | postive  |
| TAZ       | TNFRSF14-A | 0.418167959  | 3.15E-24  | postive  |
| SLC2A6    | AC104758.1 | 0.422089182  | 1.07E-24  | postive  |
| NCOA4     | AC104758.1 | -0.439096563 | 8.21E-27  | negative |
| PHKG2     | AC104758.1 | 0.559530926  | 9.94E-46  | postive  |
| TAZ       | AC104758.1 | 0.60008167   | 5.00E-54  | postive  |
| HELLS     | AC093788.1 | 0.43966712   | 6.94E-27  | postive  |
| ZNF419    | AC093788.1 | 0.453238897  | 1.16E-28  | postive  |
| KLHL24    | AC093788.1 | 0.441858473  | 3.63E-27  | postive  |
| TUBE1     | AC093788.1 | 0.488563702  | 1.11E-33  | postive  |
| GABPB1    | AC093788.1 | 0.571660798  | 4.32E-48  | postive  |
| LINC00472 | AC093788.1 | 0.832186432  | 1.23E-139 | postive  |
| ATM       | AC093788.1 | 0.548051549  | 1.40E-43  | postive  |
| FBXW7     | AC093788.1 | 0.479161032  | 2.74E-32  | postive  |
| ZNF419    | AL355987.4 | 0.445012542  | 1.41E-27  | postive  |
| TAZ       | AL355987.4 | 0.405956726  | 8.41E-23  | postive  |
| FH        | AC103563.7 | 0.430824814  | 9.07E-26  | postive  |
| ISCU      | AC103563.7 | 0.731182521  | 3.00E-91  | postive  |
| DDIT3     | AC103563.7 | 0.509631167  | 5.75E-37  | postive  |
| KLHL24    | AC103563.7 | 0.43681998   | 1.60E-26  | postive  |
| SLC2A12   | AC103563.7 | 0.457832644  | 2.78E-29  | postive  |
| CS        | AC103563.7 | 0.400163779  | 3.81E-22  | postive  |
| GOT1      | AC103563.7 | 0.4652687    | 2.63E-30  | postive  |
| ATG4D     | AC103563.7 | 0.663493284  | 1.14E-69  | postive  |
| MAP1LC3A  | AC103563.7 | 0.524745861  | 1.81E-39  | postive  |
| GABARAPL2 | AC103563.7 | 0.512947557  | 1.66E-37  | postive  |
| GABARAPL1 | AC103563.7 | 0.741945164  | 2.68E-95  | postive  |
| WIPI2     | AC103563.7 | 0.507042893  | 1.50E-36  | postive  |
| BAP1      | AC103563.7 | 0.476901777  | 5.84E-32  | postive  |
| LPIN1     | AC103563.7 | 0.583971924  | 1.37E-50  | postive  |

|           |            |              |          |          |
|-----------|------------|--------------|----------|----------|
| SLC3A2    | INSIG1-DT  | 0.517466894  | 3.01E-38 | postive  |
| ISCU      | INSIG1-DT  | 0.507485632  | 1.27E-36 | postive  |
| ASNS      | INSIG1-DT  | 0.414321074  | 9.00E-24 | postive  |
| DDIT3     | INSIG1-DT  | 0.604632247  | 4.92E-55 | postive  |
| ATG4D     | INSIG1-DT  | 0.425665218  | 3.92E-25 | postive  |
| GABARAPL2 | INSIG1-DT  | 0.41994086   | 1.94E-24 | postive  |
| GABARAPL1 | INSIG1-DT  | 0.594713715  | 7.33E-53 | postive  |
| LPIN1     | INSIG1-DT  | 0.448754437  | 4.57E-28 | postive  |
| HELLS     | LINC02100  | 0.405942234  | 8.44E-23 | postive  |
| ATM       | LINC02100  | 0.442424451  | 3.07E-27 | postive  |
| HELLS     | AC027796.1 | 0.569280246  | 1.28E-47 | postive  |
| TUBE1     | AC027796.1 | 0.438104439  | 1.10E-26 | postive  |
| ALOX12    | AC027796.1 | 0.594018031  | 1.04E-52 | postive  |
| GABPB1    | AC027796.1 | 0.44901807   | 4.22E-28 | postive  |
| DUOX1     | AC027796.1 | 0.419477897  | 2.20E-24 | postive  |
| LINC00472 | AC027796.1 | 0.41460867   | 8.33E-24 | postive  |
| ATM       | AC027796.1 | 0.606720848  | 1.68E-55 | postive  |
| FBXW7     | AC027796.1 | 0.453900787  | 9.43E-29 | postive  |
| FANCD2    | LINC02084  | 0.48971658   | 7.41E-34 | postive  |
| PML       | LINC02084  | 0.401583235  | 2.64E-22 | postive  |
| SLC2A6    | LINC02084  | 0.403033407  | 1.81E-22 | postive  |
| IFNG      | LINC02084  | 0.637279004  | 9.30E-63 | postive  |
| ZNF419    | AC113139.1 | 0.424388319  | 5.62E-25 | postive  |
| PHKG2     | AC113139.1 | 0.467995107  | 1.09E-30 | postive  |
| MAPK3     | AC113139.1 | -0.408781407 | 3.98E-23 | negative |
| LPIN1     | AC113139.1 | 0.433128581  | 4.68E-26 | postive  |
| TAZ       | AC113139.1 | 0.449179776  | 4.01E-28 | postive  |
| ZNF419    | AC005840.4 | 0.422331664  | 9.97E-25 | postive  |
| PHKG2     | AC005840.4 | 0.689125429  | 3.84E-77 | postive  |
| EGLN2     | AC005840.4 | 0.46868816   | 8.71E-31 | postive  |
| TAZ       | AC005840.4 | 0.625741819  | 6.35E-60 | postive  |
| FANCD2    | AC100861.1 | 0.45966425   | 1.56E-29 | postive  |
| MTOR      | AC242426.2 | 0.470186575  | 5.35E-31 | postive  |
| ZNF419    | AC242426.2 | 0.425539354  | 4.06E-25 | postive  |
| KLHL24    | AC242426.2 | 0.505820268  | 2.35E-36 | postive  |
| TUBE1     | AC242426.2 | 0.43750047   | 1.31E-26 | postive  |
| MAP3K5    | AC242426.2 | 0.441035107  | 4.63E-27 | postive  |
| ALOX12    | AC242426.2 | 0.459712306  | 1.54E-29 | postive  |
| IREB2     | AC242426.2 | 0.606999059  | 1.45E-55 | postive  |
| GABPB1    | AC242426.2 | 0.595409281  | 5.19E-53 | postive  |
| PIK3CA    | AC242426.2 | 0.529190695  | 3.15E-40 | postive  |
| ATG7      | AC242426.2 | 0.409131149  | 3.63E-23 | postive  |
| MAPK8     | AC242426.2 | 0.527524264  | 6.08E-40 | postive  |
| LINC00472 | AC242426.2 | 0.651018058  | 2.70E-66 | postive  |
| PRKAA2    | AC242426.2 | 0.435229426  | 2.54E-26 | postive  |
| PRKAA1    | AC242426.2 | 0.457731472  | 2.87E-29 | postive  |
| LPIN1     | AC242426.2 | 0.400095456  | 3.88E-22 | postive  |
| ATM       | AC242426.2 | 0.666971447  | 1.22E-70 | postive  |
| FBXW7     | AC242426.2 | 0.452597692  | 1.41E-28 | postive  |
| TFAP2C    | VASH1-AS1  | 0.545422333  | 4.22E-43 | postive  |
| HBA1      | VASH1-AS1  | 0.642403985  | 4.68E-64 | postive  |
| HELLS     | AC008966.2 | 0.412647527  | 1.41E-23 | postive  |
| TUBE1     | AC008966.2 | 0.424522543  | 5.41E-25 | postive  |
| ALOX12    | AC008966.2 | 0.425313078  | 4.33E-25 | postive  |
| ATM       | AC008966.2 | 0.401349846  | 2.80E-22 | postive  |
| HELLS     | AC022558.1 | 0.543961261  | 7.76E-43 | postive  |
| ZNF419    | AC022558.1 | 0.441574038  | 3.95E-27 | postive  |
| TUBE1     | AC022558.1 | 0.499654989  | 2.20E-35 | postive  |

|           |             |              |           |          |
|-----------|-------------|--------------|-----------|----------|
| ALOX12    | AC022558.1  | 0.543430928  | 9.68E-43  | postive  |
| IREB2     | AC022558.1  | 0.429863584  | 1.19E-25  | postive  |
| GABPB1    | AC022558.1  | 0.579707225  | 1.03E-49  | postive  |
| MAPK8     | AC022558.1  | 0.440267664  | 5.81E-27  | postive  |
| LINC00472 | AC022558.1  | 0.727376694  | 7.27E-90  | postive  |
| LPIN1     | AC022558.1  | 0.410190231  | 2.74E-23  | postive  |
| ATM       | AC022558.1  | 0.674160183  | 1.09E-72  | postive  |
| FBXW7     | AC022558.1  | 0.512475152  | 1.99E-37  | postive  |
| MTOR      | FGD5-AS1    | 0.419102585  | 2.44E-24  | postive  |
| ISCU      | FGD5-AS1    | 0.453178532  | 1.18E-28  | postive  |
| ACSL3     | FGD5-AS1    | 0.547110374  | 2.08E-43  | postive  |
| HIF1A     | FGD5-AS1    | 0.483707011  | 5.88E-33  | postive  |
| CA9       | FGD5-AS1    | -0.474219687 | 1.42E-31  | negative |
| CHMP5     | FGD5-AS1    | 0.403156435  | 1.75E-22  | postive  |
| OXSRI     | FGD5-AS1    | 0.435178735  | 2.58E-26  | postive  |
| KLHL24    | FGD5-AS1    | 0.553206049  | 1.55E-44  | postive  |
| EIF2S1    | FGD5-AS1    | 0.410115003  | 2.79E-23  | postive  |
| EIF2AK4   | FGD5-AS1    | 0.458312358  | 2.39E-29  | postive  |
| IREB2     | FGD5-AS1    | 0.482764791  | 8.10E-33  | postive  |
| PIK3CA    | FGD5-AS1    | 0.557502142  | 2.42E-45  | postive  |
| ACSL4     | FGD5-AS1    | 0.440328378  | 5.71E-27  | postive  |
| KRAS      | FGD5-AS1    | 0.495251729  | 1.06E-34  | postive  |
| ATG5      | FGD5-AS1    | 0.512619909  | 1.88E-37  | postive  |
| ATG7      | FGD5-AS1    | 0.428810639  | 1.61E-25  | postive  |
| ATG3      | FGD5-AS1    | 0.437757342  | 1.22E-26  | postive  |
| GABARAPL1 | FGD5-AS1    | 0.521829612  | 5.63E-39  | postive  |
| PRKAA1    | FGD5-AS1    | 0.47163675   | 3.33E-31  | postive  |
| BAP1      | FGD5-AS1    | 0.55135835   | 3.43E-44  | postive  |
| TGFBR1    | FGD5-AS1    | 0.464337429  | 3.54E-30  | postive  |
| LPIN1     | FGD5-AS1    | 0.572718406  | 2.66E-48  | postive  |
| CISD2     | LINC00526   | 0.449491625  | 3.65E-28  | postive  |
| PEBP1     | LINC00526   | 0.51574656   | 5.79E-38  | postive  |
| NCF2      | AC004921.1  | 0.409483523  | 3.30E-23  | postive  |
| HAMP      | AC004921.1  | 0.407434619  | 5.69E-23  | postive  |
| SETD1B    | CTBP1-DT    | 0.427494961  | 2.34E-25  | postive  |
| SP1       | CTBP1-DT    | 0.424153534  | 6.00E-25  | postive  |
| RIPK1     | CTBP1-DT    | 0.413900317  | 1.01E-23  | postive  |
| BECN1     | CTBP1-DT    | 0.431132463  | 8.30E-26  | postive  |
| YY1AP1    | CTBP1-DT    | 0.445746209  | 1.13E-27  | postive  |
| PHKG2     | BCRP3       | 0.42474954   | 5.07E-25  | postive  |
| TAZ       | BCRP3       | 0.504345136  | 4.03E-36  | postive  |
| ZNF419    | AF111169.3  | 0.521938181  | 5.40E-39  | postive  |
| TUBE1     | AF111169.3  | 0.560505199  | 6.47E-46  | postive  |
| SETD1B    | AF111169.3  | 0.475532992  | 9.20E-32  | postive  |
| ALOX12    | AF111169.3  | 0.618950669  | 2.61E-58  | postive  |
| GABPB1    | AF111169.3  | 0.538319724  | 7.97E-42  | postive  |
| ZEB1      | AF111169.3  | 0.427451083  | 2.37E-25  | postive  |
| ATM       | AF111169.3  | 0.613053713  | 6.11E-57  | postive  |
| FBXW7     | AF111169.3  | 0.549251047  | 8.40E-44  | postive  |
| HELLS     | N4BP2L2-IT2 | 0.524467822  | 2.02E-39  | postive  |
| ZNF419    | N4BP2L2-IT2 | 0.438301117  | 1.04E-26  | postive  |
| KLHL24    | N4BP2L2-IT2 | 0.403125186  | 1.77E-22  | postive  |
| TUBE1     | N4BP2L2-IT2 | 0.535176276  | 2.86E-41  | postive  |
| ALOX12    | N4BP2L2-IT2 | 0.500916217  | 1.40E-35  | postive  |
| GABPB1    | N4BP2L2-IT2 | 0.615121701  | 2.04E-57  | postive  |
| MAPK8     | N4BP2L2-IT2 | 0.420613924  | 1.61E-24  | postive  |
| LINC00472 | N4BP2L2-IT2 | 0.786443748  | 1.88E-114 | postive  |
| ATM       | N4BP2L2-IT2 | 0.731630925  | 2.05E-91  | postive  |



|           |             |              |           |          |
|-----------|-------------|--------------|-----------|----------|
| FBXW7     | N4BP2L2-IT2 | 0.528605894  | 3.97E-40  | postive  |
| TUBE1     | MIR3142HG   | 0.412730649  | 1.38E-23  | postive  |
| ALOX12    | MIR3142HG   | 0.486875374  | 1.98E-33  | postive  |
| ATM       | MIR3142HG   | 0.406091685  | 8.12E-23  | postive  |
| HELLS     | Z93930.3    | 0.51043868   | 4.26E-37  | postive  |
| ZNF419    | Z93930.3    | 0.428235745  | 1.90E-25  | postive  |
| TUBE1     | Z93930.3    | 0.505911184  | 2.27E-36  | postive  |
| ALOX12    | Z93930.3    | 0.427793176  | 2.15E-25  | postive  |
| GABPB1    | Z93930.3    | 0.587751016  | 2.22E-51  | postive  |
| LINC00472 | Z93930.3    | 0.757118723  | 2.31E-101 | postive  |
| ATM       | Z93930.3    | 0.701794906  | 3.94E-81  | postive  |
| FBXW7     | Z93930.3    | 0.534958329  | 3.13E-41  | postive  |
| ISCU      | AC024575.1  | 0.457703713  | 2.89E-29  | postive  |
| ATG4D     | AC024575.1  | 0.56112704   | 4.92E-46  | postive  |
| GABARAPL2 | AC024575.1  | 0.448315265  | 5.22E-28  | postive  |
| TUBE1     | TMEM9B-AS   | 0.417701691  | 3.58E-24  | postive  |
| ALOX12    | TMEM9B-AS   | 0.494351404  | 1.46E-34  | postive  |
| LPIN1     | TMEM9B-AS   | 0.402426285  | 2.12E-22  | postive  |
| ATM       | TMEM9B-AS   | 0.402864958  | 1.89E-22  | postive  |
| HELLS     | U73169.1    | 0.537148309  | 1.29E-41  | postive  |
| ZNF419    | U73169.1    | 0.409086527  | 3.67E-23  | postive  |
| TUBE1     | U73169.1    | 0.509878097  | 5.24E-37  | postive  |
| ALOX12    | U73169.1    | 0.499767547  | 2.12E-35  | postive  |
| GABPB1    | U73169.1    | 0.575210759  | 8.42E-49  | postive  |
| ATG7      | U73169.1    | 0.437074302  | 1.49E-26  | postive  |
| MAPK8     | U73169.1    | 0.411442081  | 1.96E-23  | postive  |
| LINC00472 | U73169.1    | 0.638157253  | 5.59E-63  | postive  |
| ATM       | U73169.1    | 0.74430031   | 3.28E-96  | postive  |
| FBXW7     | U73169.1    | 0.546652368  | 2.52E-43  | postive  |
| HELLS     | AC012435.3  | 0.510974557  | 3.48E-37  | postive  |
| ZNF419    | AC012435.3  | 0.423981328  | 6.29E-25  | postive  |
| KLHL24    | AC012435.3  | 0.447970134  | 5.80E-28  | postive  |
| TUBE1     | AC012435.3  | 0.503910234  | 4.72E-36  | postive  |
| ALOX12    | AC012435.3  | 0.466880014  | 1.56E-30  | postive  |
| IREB2     | AC012435.3  | 0.41301596   | 1.28E-23  | postive  |
| GABPB1    | AC012435.3  | 0.558975491  | 1.27E-45  | postive  |
| MAPK8     | AC012435.3  | 0.42996785   | 1.16E-25  | postive  |
| LINC00472 | AC012435.3  | 0.819816119  | 3.98E-132 | postive  |
| ATM       | AC012435.3  | 0.674902643  | 6.66E-73  | postive  |
| FBXW7     | AC012435.3  | 0.475892706  | 8.17E-32  | postive  |
| FANCD2    | AC022400.1  | 0.401727359  | 2.54E-22  | postive  |
| ALOX12    | AC022400.1  | 0.508087489  | 1.02E-36  | postive  |
| TFAP2C    | AC022400.1  | 0.424441611  | 5.53E-25  | postive  |
| FBXW7     | DTNB-AS1    | 0.447993133  | 5.76E-28  | postive  |
| TFAP2C    | AC018761.1  | 0.586910358  | 3.33E-51  | postive  |
| HBA1      | AC018761.1  | 0.578137994  | 2.15E-49  | postive  |
| OTUB1     | ARIH2OS     | 0.413024441  | 1.28E-23  | postive  |
| BAP1      | ARIH2OS     | 0.406620613  | 7.06E-23  | postive  |
| HSF1      | VPS13B-DT   | 0.514755778  | 8.42E-38  | postive  |
| NRAS      | VPS13B-DT   | -0.417067254 | 4.26E-24  | negative |
| NCOA4     | VPS13B-DT   | -0.424822029 | 4.97E-25  | negative |
| PHKG2     | VPS13B-DT   | 0.548988229  | 9.39E-44  | postive  |
| ATG4D     | VPS13B-DT   | 0.424414078  | 5.58E-25  | postive  |
| ANO6      | VPS13B-DT   | -0.437027072 | 1.51E-26  | negative |
| TAZ       | VPS13B-DT   | 0.557198719  | 2.76E-45  | postive  |
| HELLS     | AC139887.1  | 0.502219951  | 8.73E-36  | postive  |
| ZNF419    | AC139887.1  | 0.425130509  | 4.56E-25  | postive  |
| TUBE1     | AC139887.1  | 0.492709913  | 2.60E-34  | postive  |

|           |            |             |           |         |
|-----------|------------|-------------|-----------|---------|
| ALOX12    | AC139887.1 | 0.566323624 | 4.86E-47  | postive |
| GABPB1    | AC139887.1 | 0.52139995  | 6.64E-39  | postive |
| LINC00472 | AC139887.1 | 0.591646031 | 3.33E-52  | postive |
| ATM       | AC139887.1 | 0.706831692 | 8.93E-83  | postive |
| FBXW7     | AC139887.1 | 0.4810322   | 1.46E-32  | postive |
| TFAP2C    | AL109947.1 | 0.551491907 | 3.24E-44  | postive |
| HBA1      | AL109947.1 | 0.501500563 | 1.13E-35  | postive |
| DUOX1     | AL109947.1 | 0.41314302  | 1.24E-23  | postive |
| HELLS     | AL590723.1 | 0.544383239 | 6.51E-43  | postive |
| TUBE1     | AL590723.1 | 0.421876865 | 1.13E-24  | postive |
| GABPB1    | AL590723.1 | 0.578108174 | 2.18E-49  | postive |
| PIK3CA    | AL590723.1 | 0.401573317 | 2.65E-22  | postive |
| ATG7      | AL590723.1 | 0.463626536 | 4.44E-30  | postive |
| MAPK8     | AL590723.1 | 0.407492322 | 5.61E-23  | postive |
| LINC00472 | AL590723.1 | 0.728401028 | 3.10E-90  | postive |
| ATM       | AL590723.1 | 0.719869558 | 3.35E-87  | postive |
| FBXW7     | AL590723.1 | 0.476547376 | 6.57E-32  | postive |
| HELLS     | AL080317.1 | 0.585595126 | 6.28E-51  | postive |
| TUBE1     | AL080317.1 | 0.488365635 | 1.18E-33  | postive |
| ALOX12    | AL080317.1 | 0.426534847 | 3.07E-25  | postive |
| GABPB1    | AL080317.1 | 0.4740453   | 1.51E-31  | postive |
| LINC00472 | AL080317.1 | 0.541631262 | 2.04E-42  | postive |
| ATM       | AL080317.1 | 0.658250681 | 3.12E-68  | postive |
| FBXW7     | AL080317.1 | 0.45792819  | 2.69E-29  | postive |
| HELLS     | AC130650.2 | 0.51617773  | 4.91E-38  | postive |
| ZNF419    | AC130650.2 | 0.445569547 | 1.20E-27  | postive |
| KLHL24    | AC130650.2 | 0.474527276 | 1.28E-31  | postive |
| TUBE1     | AC130650.2 | 0.50082392  | 1.45E-35  | postive |
| ALOX12    | AC130650.2 | 0.408798471 | 3.96E-23  | postive |
| GABPB1    | AC130650.2 | 0.619390087 | 2.06E-58  | postive |
| MAPK8     | AC130650.2 | 0.403619286 | 1.55E-22  | postive |
| LINC00472 | AC130650.2 | 0.810691046 | 6.01E-127 | postive |
| ATM       | AC130650.2 | 0.62972437  | 6.89E-61  | postive |
| FBXW7     | AC130650.2 | 0.527483433 | 6.18E-40  | postive |
| FANCD2    | AC007773.1 | 0.466283201 | 1.90E-30  | postive |
| HELLS     | AC007773.1 | 0.528105963 | 4.84E-40  | postive |
| PSAT1     | AC007773.1 | 0.416328751 | 5.22E-24  | postive |
| HELLS     | AL021368.2 | 0.499833878 | 2.07E-35  | postive |
| ZNF419    | AL021368.2 | 0.580654023 | 6.60E-50  | postive |
| VEGFA     | AL021368.2 | 0.458092155 | 2.56E-29  | postive |
| TUBE1     | AL021368.2 | 0.72738932  | 7.19E-90  | postive |
| SETD1B    | AL021368.2 | 0.415693561 | 6.20E-24  | postive |
| ALOX12    | AL021368.2 | 0.702578563 | 2.20E-81  | postive |
| IREB2     | AL021368.2 | 0.44113857  | 4.49E-27  | postive |
| SP1       | AL021368.2 | 0.459436759 | 1.68E-29  | postive |
| GABPB1    | AL021368.2 | 0.631280247 | 2.87E-61  | postive |
| ZEB1      | AL021368.2 | 0.407249579 | 5.98E-23  | postive |
| MAPK8     | AL021368.2 | 0.558548971 | 1.53E-45  | postive |
| LINC00472 | AL021368.2 | 0.50040595  | 1.68E-35  | postive |
| ATM       | AL021368.2 | 0.795373549 | 7.40E-119 | postive |
| FBXW7     | AL021368.2 | 0.567736464 | 2.57E-47  | postive |
| HMGB1     | AC011451.1 | 0.467403492 | 1.32E-30  | postive |
| TFR2      | IGFL2-AS1  | 0.444496728 | 1.65E-27  | postive |
| IDH1      | IGFL2-AS1  | 0.518959048 | 1.70E-38  | postive |
| ZNF419    | CD27-AS1   | 0.407921641 | 5.00E-23  | postive |
| ALOX12    | CD27-AS1   | 0.436812295 | 1.60E-26  | postive |
| PHKG2     | CD27-AS1   | 0.553730701 | 1.24E-44  | postive |
| ULK1      | CD27-AS1   | 0.47222417  | 2.74E-31  | postive |

|           |            |             |           |         |
|-----------|------------|-------------|-----------|---------|
| TAZ       | CD27-AS1   | 0.568109876 | 2.17E-47  | postive |
| HELLS     | AL359095.1 | 0.529112663 | 3.25E-40  | postive |
| TUBE1     | AL359095.1 | 0.43727221  | 1.40E-26  | postive |
| ALOX12    | AL359095.1 | 0.423140642 | 7.96E-25  | postive |
| GABPB1    | AL359095.1 | 0.499198288 | 2.60E-35  | postive |
| ATG7      | AL359095.1 | 0.430876781 | 8.93E-26  | postive |
| LINC00472 | AL359095.1 | 0.524228433 | 2.22E-39  | postive |
| ATM       | AL359095.1 | 0.69160274  | 6.61E-78  | postive |
| FBXW7     | AL359095.1 | 0.403168897 | 1.75E-22  | postive |
| ZNF419    | AC072061.1 | 0.427911826 | 2.08E-25  | postive |
| ALOX12    | AC072061.1 | 0.401438814 | 2.74E-22  | postive |
| TFAP2C    | AL603832.1 | 0.562648058 | 2.51E-46  | postive |
| HBA1      | AL603832.1 | 0.505130528 | 3.02E-36  | postive |
| PHKG2     | AC107464.2 | 0.563771613 | 1.52E-46  | postive |
| TAZ       | AC107464.2 | 0.441923785 | 3.56E-27  | postive |
| ZNF419    | AL159169.2 | 0.577915192 | 2.39E-49  | postive |
| TUBE1     | AL159169.2 | 0.514211564 | 1.03E-37  | postive |
| ALOX12    | AL159169.2 | 0.484537507 | 4.43E-33  | postive |
| GABPB1    | AL159169.2 | 0.516650913 | 4.10E-38  | postive |
| PHKG2     | AL159169.2 | 0.403512471 | 1.60E-22  | postive |
| SOCS1     | AL159169.2 | 0.436013706 | 2.03E-26  | postive |
| TAZ       | AL159169.2 | 0.506435831 | 1.87E-36  | postive |
| FBXW7     | AL159169.2 | 0.516135979 | 4.99E-38  | postive |
| ALB       | TCL6       | 0.611456903 | 1.42E-56  | postive |
| GPX2      | TCL6       | 0.456469904 | 4.25E-29  | postive |
| TFR2      | TCL6       | 0.446816771 | 8.22E-28  | postive |
| CDO1      | TCL6       | 0.558234532 | 1.75E-45  | postive |
| KLHL24    | RMST       | 0.408723222 | 4.05E-23  | postive |
| FBXW7     | RMST       | 0.46608163  | 2.02E-30  | postive |
| STMN1     | AL441992.1 | 0.432916693 | 4.97E-26  | postive |
| CDKN2A    | AL441992.1 | 0.412548815 | 1.45E-23  | postive |
| HELLS     | AC007496.1 | 0.524753671 | 1.81E-39  | postive |
| GABPB1    | AC007496.1 | 0.519762622 | 1.25E-38  | postive |
| ATG7      | AC007496.1 | 0.476776322 | 6.09E-32  | postive |
| LINC00472 | AC007496.1 | 0.621336664 | 7.15E-59  | postive |
| ATM       | AC007496.1 | 0.71295787  | 7.99E-85  | postive |
| FBXW7     | AC007496.1 | 0.460357211 | 1.25E-29  | postive |
| FANCD2    | ASB16-AS1  | 0.433424852 | 4.29E-26  | postive |
| BRD4      | ASB16-AS1  | 0.495877999 | 8.50E-35  | postive |
| ZNF419    | ASB16-AS1  | 0.460965039 | 1.04E-29  | postive |
| SETD1B    | ASB16-AS1  | 0.462005179 | 7.45E-30  | postive |
| ALOX12    | ASB16-AS1  | 0.570670404 | 6.79E-48  | postive |
| PHKG2     | ASB16-AS1  | 0.620934001 | 8.90E-59  | postive |
| TAZ       | ASB16-AS1  | 0.649326674 | 7.52E-66  | postive |
| ZNF419    | AL590666.1 | 0.480271306 | 1.88E-32  | postive |
| VEGFA     | AL590666.1 | 0.416892879 | 4.47E-24  | postive |
| TUBE1     | AL590666.1 | 0.515867438 | 5.53E-38  | postive |
| SETD1B    | AL590666.1 | 0.425759331 | 3.82E-25  | postive |
| ALOX12    | AL590666.1 | 0.588767711 | 1.36E-51  | postive |
| GABPB1    | AL590666.1 | 0.418384428 | 2.97E-24  | postive |
| ATM       | AL590666.1 | 0.41598211  | 5.73E-24  | postive |
| TAZ       | AL590666.1 | 0.463508297 | 4.61E-30  | postive |
| FBXW7     | AL590666.1 | 0.457009826 | 3.59E-29  | postive |
| KLHL24    | AC027117.1 | 0.644945926 | 1.04E-64  | postive |
| PIK3CA    | AC027117.1 | 0.411024109 | 2.19E-23  | postive |
| LINC00472 | AC027117.1 | 0.837133242 | 8.17E-143 | postive |
| LPIN1     | AC027117.1 | 0.513648196 | 1.28E-37  | postive |
| KLHL24    | AC040174.2 | 0.57254548  | 2.88E-48  | postive |

|           |            |              |           |          |
|-----------|------------|--------------|-----------|----------|
| GABARAPL1 | AC040174.2 | 0.401282675  | 2.85E-22  | postive  |
| LINC00472 | AC040174.2 | 0.802104172  | 2.52E-122 | postive  |
| LPIN1     | AC040174.2 | 0.454052901  | 9.00E-29  | postive  |
| FANCD2    | AC135178.4 | 0.425303463  | 4.34E-25  | postive  |
| ALOX12    | AC135178.4 | 0.439555699  | 7.17E-27  | postive  |
| TFAP2C    | AC135178.4 | 0.541475924  | 2.18E-42  | postive  |
| HBA1      | AC135178.4 | 0.459465196  | 1.66E-29  | postive  |
| DUOX1     | AC135178.4 | 0.44751099   | 6.66E-28  | postive  |
| CA9       | BX322562.1 | 0.444439883  | 1.68E-27  | postive  |
| MAPK14    | BX322562.1 | -0.457138961 | 3.45E-29  | negative |
| EIF2AK4   | BX322562.1 | -0.467436292 | 1.31E-30  | negative |
| IREB2     | BX322562.1 | -0.436665399 | 1.68E-26  | negative |
| PIK3CA    | BX322562.1 | -0.46174711  | 8.08E-30  | negative |
| NRAS      | BX322562.1 | -0.406488761 | 7.31E-23  | negative |
| HRAS      | BX322562.1 | 0.510847938  | 3.65E-37  | postive  |
| ATG5      | BX322562.1 | -0.407402865 | 5.74E-23  | negative |
| NCOA4     | BX322562.1 | -0.458874895 | 2.00E-29  | negative |
| PHKG2     | BX322562.1 | 0.435598676  | 2.29E-26  | postive  |
| ANO6      | BX322562.1 | -0.412966384 | 1.30E-23  | negative |
| TLR4      | BX322562.1 | -0.446564885 | 8.87E-28  | negative |
| TAZ       | BX322562.1 | 0.460964401  | 1.04E-29  | postive  |
| MTDH      | BX322562.1 | -0.442893098 | 2.67E-27  | negative |
| ZEB1      | AP001922.6 | 0.465654979  | 2.32E-30  | postive  |
| EPAS1     | AP001922.6 | 0.468526635  | 9.18E-31  | postive  |
| ISCU      | AC069224.1 | 0.460089732  | 1.37E-29  | postive  |
| ZNF419    | AC069224.1 | 0.400838277  | 3.20E-22  | postive  |
| KLHL24    | AC069224.1 | 0.604786936  | 4.54E-55  | postive  |
| GABARAPL1 | AC069224.1 | 0.553340766  | 1.46E-44  | postive  |
| LINC00472 | AC069224.1 | 0.50109253   | 1.31E-35  | postive  |
| LPIN1     | AC069224.1 | 0.482819366  | 7.95E-33  | postive  |
| FANCD2    | ZNF232-AS1 | 0.417200408  | 4.11E-24  | postive  |
| ASNS      | ZNF232-AS1 | 0.405397961  | 9.74E-23  | postive  |
| SLC2A6    | ZNF232-AS1 | 0.416142588  | 5.49E-24  | postive  |
| PHKG2     | ZNF232-AS1 | 0.429588525  | 1.29E-25  | postive  |
| EGLN2     | ZNF232-AS1 | 0.407142678  | 6.15E-23  | postive  |
| TFAP2C    | AL121821.2 | 0.515266134  | 6.94E-38  | postive  |
| LPIN1     | AL121821.2 | 0.411293322  | 2.04E-23  | postive  |
| HELLS     | AC131934.1 | 0.510944208  | 3.52E-37  | postive  |
| ZNF419    | AC131934.1 | 0.426410334  | 3.18E-25  | postive  |
| TUBE1     | AC131934.1 | 0.435840148  | 2.13E-26  | postive  |
| ALOX12    | AC131934.1 | 0.490857782  | 4.98E-34  | postive  |
| GABPB1    | AC131934.1 | 0.531057711  | 1.50E-40  | postive  |
| LINC00472 | AC131934.1 | 0.700205516  | 1.28E-80  | postive  |
| ATM       | AC131934.1 | 0.63017822   | 5.34E-61  | postive  |
| FBXW7     | AC131934.1 | 0.453141546  | 1.19E-28  | postive  |
| KLHL24    | MFF-DT     | 0.50234253   | 8.35E-36  | postive  |
| GABPB1    | MFF-DT     | 0.425322361  | 4.32E-25  | postive  |
| PIK3CA    | MFF-DT     | 0.404580397  | 1.21E-22  | postive  |
| LINC00472 | MFF-DT     | 0.785586466  | 4.85E-114 | postive  |
| LPIN1     | MFF-DT     | 0.422502375  | 9.51E-25  | postive  |
| ATM       | MFF-DT     | 0.402175059  | 2.26E-22  | postive  |
| HELLS     | AC009495.2 | 0.41878343   | 2.66E-24  | postive  |
| TUBE1     | AC009495.2 | 0.603859215  | 7.31E-55  | postive  |
| ALOX12    | AC009495.2 | 0.547835951  | 1.53E-43  | postive  |
| GABPB1    | AC009495.2 | 0.42485542   | 4.93E-25  | postive  |
| ATM       | AC009495.2 | 0.639028713  | 3.37E-63  | postive  |
| FBXW7     | AC009495.2 | 0.45088484   | 2.39E-28  | postive  |
| CHAC1     | ASMTL-AS1  | 0.408836091  | 3.93E-23  | postive  |

|           |            |             |           |         |
|-----------|------------|-------------|-----------|---------|
| ZNF419    | ASMTL-AS1  | 0.403854675 | 1.46E-22  | postive |
| PHKG2     | ASMTL-AS1  | 0.593235362 | 1.52E-52  | postive |
| TAZ       | ASMTL-AS1  | 0.655721194 | 1.50E-67  | postive |
| MAP1LC3A  | AC004241.3 | 0.42303814  | 8.19E-25  | postive |
| LINC00472 | AC004241.3 | 0.565315595 | 7.64E-47  | postive |
| LPIN1     | AC004241.3 | 0.517732686 | 2.72E-38  | postive |
| KLHL24    | MIR222HG   | 0.531772083 | 1.13E-40  | postive |
| KRAS      | MIR222HG   | 0.409759262 | 3.07E-23  | postive |
| LINC00472 | MIR222HG   | 0.797961421 | 3.56E-120 | postive |
| LPIN1     | MIR222HG   | 0.486358739 | 2.37E-33  | postive |
| AKR1C2    | LINC00942  | 0.407319979 | 5.87E-23  | postive |
| NQO1      | LINC00942  | 0.425522442 | 4.08E-25  | postive |
| FANCD2    | AC009690.2 | 0.411635979 | 1.86E-23  | postive |
| HELLS     | AC009690.2 | 0.50158034  | 1.10E-35  | postive |
| ZNF419    | AC009690.2 | 0.592748867 | 1.94E-52  | postive |
| TUBE1     | AC009690.2 | 0.59809384  | 1.36E-53  | postive |
| SETD1B    | AC009690.2 | 0.404831454 | 1.13E-22  | postive |
| ALOX12    | AC009690.2 | 0.694453167 | 8.55E-79  | postive |
| GABPB1    | AC009690.2 | 0.454161573 | 8.70E-29  | postive |
| PHKG2     | AC009690.2 | 0.499245713 | 2.55E-35  | postive |
| LINC00472 | AC009690.2 | 0.41913698  | 2.42E-24  | postive |
| ATM       | AC009690.2 | 0.500451392 | 1.65E-35  | postive |
| TAZ       | AC009690.2 | 0.563414032 | 1.79E-46  | postive |
| FBXW7     | AC009690.2 | 0.525764366 | 1.22E-39  | postive |
| TUBE1     | AL117336.2 | 0.475701864 | 8.70E-32  | postive |
| ALOX12    | AL117336.2 | 0.519901401 | 1.18E-38  | postive |
| TAZ       | AL117336.2 | 0.443749592 | 2.07E-27  | postive |
| VEGFA     | AC091849.2 | 0.451927444 | 1.73E-28  | postive |
| ALOX12    | AC091849.2 | 0.40361551  | 1.55E-22  | postive |
| SETD1B    | CENATAC-D  | 0.457600292 | 2.99E-29  | postive |
| ALOX12    | CENATAC-D  | 0.452144221 | 1.62E-28  | postive |
| IREB2     | CENATAC-D  | 0.462808215 | 5.77E-30  | postive |
| MAPK8     | CENATAC-D  | 0.476352551 | 7.01E-32  | postive |
| ATM       | CENATAC-D  | 0.472024744 | 2.93E-31  | postive |
| YY1AP1    | CENATAC-D  | 0.433737861 | 3.92E-26  | postive |
| HELLS     | WARS2-AS1  | 0.520671237 | 8.80E-39  | postive |
| ZNF419    | WARS2-AS1  | 0.507946924 | 1.07E-36  | postive |
| TUBE1     | WARS2-AS1  | 0.588250108 | 1.74E-51  | postive |
| ALOX12    | WARS2-AS1  | 0.563611205 | 1.64E-46  | postive |
| GABPB1    | WARS2-AS1  | 0.590192882 | 6.78E-52  | postive |
| MAPK8     | WARS2-AS1  | 0.465073949 | 2.80E-30  | postive |
| LINC00472 | WARS2-AS1  | 0.579298056 | 1.25E-49  | postive |
| ATM       | WARS2-AS1  | 0.768511495 | 3.23E-106 | postive |
| FBXW7     | WARS2-AS1  | 0.540862889 | 2.80E-42  | postive |
| TFAP2C    | LINC02289  | 0.412968305 | 1.30E-23  | postive |
| HBA1      | LINC02289  | 0.409930281 | 2.93E-23  | postive |
| FANCD2    | ARHGEF2-AS | 0.46204985  | 7.34E-30  | postive |
| HELLS     | ARHGEF2-AS | 0.46861786  | 8.91E-31  | postive |
| ZNF419    | ARHGEF2-AS | 0.412038719 | 1.67E-23  | postive |
| ALOX12    | ARHGEF2-AS | 0.468955915 | 7.98E-31  | postive |
| PHKG2     | ARHGEF2-AS | 0.561909856 | 3.48E-46  | postive |
| TAZ       | ARHGEF2-AS | 0.611204937 | 1.62E-56  | postive |
| ALOX12    | AL121845.4 | 0.466600539 | 1.71E-30  | postive |
| MIOX      | AL121845.4 | 0.533865168 | 4.86E-41  | postive |
| ZNF419    | ZNF790-AS1 | 0.465224773 | 2.66E-30  | postive |
| LINC00472 | ZNF790-AS1 | 0.451964622 | 1.71E-28  | postive |
| ALOX12    | AC127521.1 | 0.603417425 | 9.17E-55  | postive |
| TAZ       | AC127521.1 | 0.435277316 | 2.51E-26  | postive |

|           |            |              |           |          |
|-----------|------------|--------------|-----------|----------|
| VEGFA     | C6orf223   | 0.453658563  | 1.02E-28  | postive  |
| FANCD2    | SLBP-DT    | 0.416355001  | 5.18E-24  | postive  |
| BRD4      | SLBP-DT    | 0.431640354  | 7.18E-26  | postive  |
| ZNF419    | SLBP-DT    | 0.48036288   | 1.83E-32  | postive  |
| ALOX12    | SLBP-DT    | 0.420382384  | 1.71E-24  | postive  |
| NCOA4     | SLBP-DT    | -0.455671011 | 5.45E-29  | negative |
| PHKG2     | SLBP-DT    | 0.722784798  | 3.17E-88  | postive  |
| MAPK1     | SLBP-DT    | -0.435362878 | 2.45E-26  | negative |
| TAZ       | SLBP-DT    | 0.764285704  | 2.20E-104 | postive  |
| BNIP3     | LINC02275  | 0.416001793  | 5.70E-24  | postive  |
| ALOX12    | LINC02275  | 0.455651611  | 5.48E-29  | postive  |
| ATM       | LINC02275  | 0.437082189  | 1.48E-26  | postive  |
| HELLS     | AC092301.1 | 0.481360386  | 1.30E-32  | postive  |
| BRD4      | AC092301.1 | 0.438566256  | 9.60E-27  | postive  |
| ZNF419    | AC092301.1 | 0.560651395  | 6.07E-46  | postive  |
| TUBE1     | AC092301.1 | 0.584009576  | 1.34E-50  | postive  |
| SETD1B    | AC092301.1 | 0.461501808  | 8.73E-30  | postive  |
| ALOX12    | AC092301.1 | 0.620022194  | 1.46E-58  | postive  |
| GABPB1    | AC092301.1 | 0.503404392  | 5.68E-36  | postive  |
| LINC00472 | AC092301.1 | 0.524632493  | 1.89E-39  | postive  |
| ATM       | AC092301.1 | 0.581979478  | 3.53E-50  | postive  |
| TAZ       | AC092301.1 | 0.428986148  | 1.53E-25  | postive  |
| FBXW7     | AC092301.1 | 0.492284974  | 3.02E-34  | postive  |
| TFAP2C    | AC063943.1 | 0.478029049  | 4.00E-32  | postive  |
| HBA1      | AP003032.1 | 0.693772413  | 1.40E-78  | postive  |
| HRAS      | AP003032.1 | 0.554619547  | 8.44E-45  | postive  |
| EGLN2     | AP003032.1 | 0.702395568  | 2.52E-81  | postive  |
| FANCD2    | PRDX6-AS1  | 0.46054018   | 1.18E-29  | postive  |
| HELLS     | PRDX6-AS1  | 0.554407229  | 9.25E-45  | postive  |
| ALOX12    | PRDX6-AS1  | 0.510449747  | 4.24E-37  | postive  |
| TFAP2C    | PRDX6-AS1  | 0.443760557  | 2.06E-27  | postive  |
| HBA1      | PRDX6-AS1  | 0.41088478   | 2.27E-23  | postive  |
| GABPB1    | PRDX6-AS1  | 0.409869231  | 2.98E-23  | postive  |
| DUOX1     | PRDX6-AS1  | 0.479821109  | 2.19E-32  | postive  |
| ATM       | PRDX6-AS1  | 0.427701999  | 2.21E-25  | postive  |
| FBXW7     | PRDX6-AS1  | 0.425433935  | 4.19E-25  | postive  |
| HELLS     | AC009120.2 | 0.404893415  | 1.11E-22  | postive  |
| ZNF419    | AC009120.2 | 0.592103389  | 2.66E-52  | postive  |
| TUBE1     | AC009120.2 | 0.662686174  | 1.90E-69  | postive  |
| SETD1B    | AC009120.2 | 0.457632724  | 2.96E-29  | postive  |
| ALOX12    | AC009120.2 | 0.622114488  | 4.67E-59  | postive  |
| GABPB1    | AC009120.2 | 0.457067213  | 3.53E-29  | postive  |
| PHKG2     | AC009120.2 | 0.553100885  | 1.62E-44  | postive  |
| LINC00472 | AC009120.2 | 0.459203361  | 1.81E-29  | postive  |
| ATM       | AC009120.2 | 0.442460187  | 3.03E-27  | postive  |
| TAZ       | AC009120.2 | 0.612056563  | 1.03E-56  | postive  |
| FBXW7     | AC009120.2 | 0.438835202  | 8.87E-27  | postive  |
| RB1       | AC004112.1 | 0.545079308  | 4.87E-43  | postive  |
| MTOR      | AC004112.1 | 0.4444454624 | 1.67E-27  | postive  |
| OTUB1     | AC004112.1 | -0.427346251 | 2.44E-25  | negative |
| OXSRI     | AC004112.1 | 0.40660331   | 7.09E-23  | postive  |
| KLHL24    | AC004112.1 | 0.413154929  | 1.23E-23  | postive  |
| TUBE1     | AC004112.1 | 0.417642999  | 3.64E-24  | postive  |
| RPL8      | AC004112.1 | -0.417631546 | 3.65E-24  | negative |
| MAP3K5    | AC004112.1 | 0.486908061  | 1.96E-33  | postive  |
| MAPK14    | AC004112.1 | 0.458655609  | 2.14E-29  | postive  |
| IREB2     | AC004112.1 | 0.646385288  | 4.41E-65  | postive  |
| SP1       | AC004112.1 | 0.493470078  | 1.99E-34  | postive  |

|           |            |             |           |         |
|-----------|------------|-------------|-----------|---------|
| GABPB1    | AC004112.1 | 0.410832662 | 2.30E-23  | postive |
| PIK3CA    | AC004112.1 | 0.575237296 | 8.32E-49  | postive |
| NRAS      | AC004112.1 | 0.435269301 | 2.52E-26  | postive |
| KRAS      | AC004112.1 | 0.482605008 | 8.55E-33  | postive |
| NCOA4     | AC004112.1 | 0.436895174 | 1.57E-26  | postive |
| MAPK1     | AC004112.1 | 0.46656388  | 1.73E-30  | postive |
| MAPK8     | AC004112.1 | 0.576129401 | 5.50E-49  | postive |
| MAPK9     | AC004112.1 | 0.453447072 | 1.09E-28  | postive |
| LINC00472 | AC004112.1 | 0.504115391 | 4.38E-36  | postive |
| PRKAA2    | AC004112.1 | 0.637754873 | 7.06E-63  | postive |
| PRKAA1    | AC004112.1 | 0.545857202 | 3.52E-43  | postive |
| TLR4      | AC004112.1 | 0.502173628 | 8.88E-36  | postive |
| ATM       | AC004112.1 | 0.706640769 | 1.03E-82  | postive |
| SIRT1     | AC004112.1 | 0.455809048 | 5.22E-29  | postive |
| HELLS     | AC010531.5 | 0.436454865 | 1.78E-26  | postive |
| ZNF419    | AC010531.5 | 0.401175535 | 2.93E-22  | postive |
| TUBE1     | AC010531.5 | 0.456368469 | 4.39E-29  | postive |
| ALOX12    | AC010531.5 | 0.591358909 | 3.83E-52  | postive |
| GABPB1    | AC010531.5 | 0.429473435 | 1.33E-25  | postive |
| MAPK8     | AC010531.5 | 0.401065534 | 3.02E-22  | postive |
| ATM       | AC010531.5 | 0.585617018 | 6.21E-51  | postive |
| FBXW7     | AC010531.5 | 0.445096194 | 1.38E-27  | postive |
| KLHL24    | AL136980.1 | 0.503699474 | 5.10E-36  | postive |
| TUBE1     | AL136980.1 | 0.418270166 | 3.07E-24  | postive |
| GABPB1    | AL136980.1 | 0.528986854 | 3.41E-40  | postive |
| PIK3CA    | AL136980.1 | 0.420438822 | 1.69E-24  | postive |
| LINC00472 | AL136980.1 | 0.916016612 | 3.51E-215 | postive |
| ATM       | AL136980.1 | 0.542194313 | 1.62E-42  | postive |
| ISCU      | AC116312.1 | 0.484689    | 4.20E-33  | postive |
| CHAC1     | AC116312.1 | 0.400413241 | 3.57E-22  | postive |
| DDIT3     | AC116312.1 | 0.477401894 | 4.94E-32  | postive |
| GPT2      | AC116312.1 | 0.406569456 | 7.16E-23  | postive |
| ATG4D     | AC116312.1 | 0.546692587 | 2.48E-43  | postive |
| MAP1LC3A  | AC116312.1 | 0.478154174 | 3.84E-32  | postive |
| GABARAPL1 | AC116312.1 | 0.601187232 | 2.85E-54  | postive |
| WIPI2     | AC116312.1 | 0.420391019 | 1.71E-24  | postive |
| LPIN1     | AC116312.1 | 0.450491164 | 2.69E-28  | postive |
| ZNF419    | AC092542.1 | 0.404725007 | 1.16E-22  | postive |
| VEGFA     | AC092542.1 | 0.42544191  | 4.18E-25  | postive |
| TUBE1     | AC092542.1 | 0.460686665 | 1.13E-29  | postive |
| ALOX12    | AC092542.1 | 0.442753756 | 2.78E-27  | postive |
| GABPB1    | AC092542.1 | 0.49645263  | 6.93E-35  | postive |
| ZEB1      | AC092542.1 | 0.536779504 | 1.49E-41  | postive |
| MAPK8     | AC092542.1 | 0.457849426 | 2.76E-29  | postive |
| ATM       | AC092542.1 | 0.553179615 | 1.57E-44  | postive |
| FBXW7     | AC092542.1 | 0.490495296 | 5.65E-34  | postive |
| BRD4      | AC138028.4 | 0.431999447 | 6.47E-26  | postive |
| ZNF419    | AC138028.4 | 0.582856975 | 2.32E-50  | postive |
| VEGFA     | AC138028.4 | 0.540369527 | 3.44E-42  | postive |
| TUBE1     | AC138028.4 | 0.53166997  | 1.17E-40  | postive |
| SETD1B    | AC138028.4 | 0.567404988 | 2.99E-47  | postive |
| ALOX12    | AC138028.4 | 0.664632065 | 5.49E-70  | postive |
| ATM       | AC138028.4 | 0.422589243 | 9.28E-25  | postive |
| YY1AP1    | AC138028.4 | 0.50006002  | 1.91E-35  | postive |
| TAZ       | AC138028.4 | 0.503173837 | 6.17E-36  | postive |
| FBXW7     | AC138028.4 | 0.410425275 | 2.57E-23  | postive |
| HELLS     | AL031768.1 | 0.535075209 | 2.98E-41  | postive |
| TUBE1     | AL031768.1 | 0.471499693 | 3.48E-31  | postive |

|           |              |              |           |          |
|-----------|--------------|--------------|-----------|----------|
| ALOX12    | AL031768.1   | 0.403515957  | 1.60E-22  | postive  |
| GABPB1    | AL031768.1   | 0.554237342  | 9.95E-45  | postive  |
| LINC00472 | AL031768.1   | 0.768218902  | 4.34E-106 | postive  |
| ATM       | AL031768.1   | 0.663199917  | 1.37E-69  | postive  |
| FBXW7     | AL031768.1   | 0.464253749  | 3.64E-30  | postive  |
| ZNF419    | AC120053.1   | 0.495246449  | 1.06E-34  | postive  |
| TUBE1     | AC120053.1   | 0.549657911  | 7.07E-44  | postive  |
| ALOX12    | AC120053.1   | 0.499901629  | 2.02E-35  | postive  |
| PHKG2     | AC120053.1   | 0.532232319  | 9.36E-41  | postive  |
| TAZ       | AC120053.1   | 0.576273994  | 5.14E-49  | postive  |
| LINC00472 | AC025165.5   | 0.580747241  | 6.32E-50  | postive  |
| ATM       | AC025165.5   | 0.436749068  | 1.63E-26  | postive  |
| MTOR      | KIAA1671-AS1 | 0.533506845  | 5.61E-41  | postive  |
| IREB2     | KIAA1671-AS1 | 0.482084762  | 1.02E-32  | postive  |
| ATG7      | KIAA1671-AS1 | 0.44186651   | 3.62E-27  | postive  |
| MAPK8     | KIAA1671-AS1 | 0.423509896  | 7.18E-25  | postive  |
| LINC00472 | KIAA1671-AS1 | 0.455512746  | 5.72E-29  | postive  |
| PRKAA2    | KIAA1671-AS1 | 0.431940793  | 6.58E-26  | postive  |
| TLR4      | KIAA1671-AS1 | 0.402844816  | 1.90E-22  | postive  |
| ATM       | KIAA1671-AS1 | 0.597756692  | 1.61E-53  | postive  |
| HSPA5     | AP000866.5   | -0.411726912 | 1.81E-23  | negative |
| TUBE1     | AP000866.5   | 0.451377481  | 2.05E-28  | postive  |
| ALOX12    | AP000866.5   | 0.448451879  | 5.01E-28  | postive  |
| ZNF419    | AC095057.3   | 0.423982481  | 6.29E-25  | postive  |
| TUBE1     | AC095057.3   | 0.484401207  | 4.64E-33  | postive  |
| NCOA4     | AC095057.3   | -0.402452295 | 2.11E-22  | negative |
| PHKG2     | AC095057.3   | 0.580387611  | 7.49E-50  | postive  |
| BECN1     | AC095057.3   | -0.414866246 | 7.76E-24  | negative |
| TAZ       | AC095057.3   | 0.674799333  | 7.13E-73  | postive  |
| ISCU      | LINC01213    | 0.416929503  | 4.43E-24  | postive  |
| GABARAPL1 | LINC01213    | 0.50298901   | 6.60E-36  | postive  |
| LPIN1     | LINC01213    | 0.446296772  | 9.62E-28  | postive  |
| RB1       | ARRDC1-AS1   | -0.417250844 | 4.05E-24  | negative |
| HSF1      | ARRDC1-AS1   | 0.538003169  | 9.07E-42  | postive  |
| OTUB1     | ARRDC1-AS1   | 0.446314844  | 9.56E-28  | postive  |
| ZNF419    | ARRDC1-AS1   | 0.41703359   | 4.30E-24  | postive  |
| SLC2A8    | ARRDC1-AS1   | 0.452789762  | 1.33E-28  | postive  |
| NRAS      | ARRDC1-AS1   | -0.472744086 | 2.31E-31  | negative |
| PHKG2     | ARRDC1-AS1   | 0.656764217  | 7.88E-68  | postive  |
| ATG4D     | ARRDC1-AS1   | 0.574708738  | 1.06E-48  | postive  |
| MAP1LC3A  | ARRDC1-AS1   | 0.449762958  | 3.36E-28  | postive  |
| MAPK1     | ARRDC1-AS1   | -0.437383035 | 1.36E-26  | negative |
| ANO6      | ARRDC1-AS1   | -0.493078104 | 2.29E-34  | negative |
| TAZ       | ARRDC1-AS1   | 0.623009692  | 2.86E-59  | postive  |
| VEGFA     | AC087477.2   | 0.433085662  | 4.73E-26  | postive  |
| TUBE1     | AC087477.2   | 0.526359116  | 9.62E-40  | postive  |
| ALOX12    | AC087477.2   | 0.479367706  | 2.56E-32  | postive  |
| ZNF419    | AC009090.3   | 0.524365506  | 2.10E-39  | postive  |
| KLHL24    | AC009090.3   | 0.448039328  | 5.68E-28  | postive  |
| TUBE1     | AC009090.3   | 0.592216154  | 2.52E-52  | postive  |
| ALOX12    | AC009090.3   | 0.507812778  | 1.13E-36  | postive  |
| GABPB1    | AC009090.3   | 0.483462607  | 6.39E-33  | postive  |
| MAPK8     | AC009090.3   | 0.404803509  | 1.14E-22  | postive  |
| LINC00472 | AC009090.3   | 0.72265673   | 3.52E-88  | postive  |
| ATM       | AC009090.3   | 0.527097538  | 7.20E-40  | postive  |
| FBXW7     | AC009090.3   | 0.408026952  | 4.87E-23  | postive  |
| GPX4      | AL049840.3   | -0.411828874 | 1.76E-23  | negative |
| HELLS     | AL049840.3   | 0.404122791  | 1.36E-22  | postive  |



|           |            |              |           |          |
|-----------|------------|--------------|-----------|----------|
| MTOR      | AL049840.3 | 0.491517387  | 3.95E-34  | postive  |
| ARNTL     | AL049840.3 | 0.402401445  | 2.13E-22  | postive  |
| ZNF419    | AL049840.3 | 0.513949169  | 1.14E-37  | postive  |
| ZFP69B    | AL049840.3 | 0.453553169  | 1.05E-28  | postive  |
| VEGFA     | AL049840.3 | 0.411678992  | 1.84E-23  | postive  |
| TUBE1     | AL049840.3 | 0.501450318  | 1.15E-35  | postive  |
| SETD1B    | AL049840.3 | 0.500375186  | 1.70E-35  | postive  |
| ALOX12    | AL049840.3 | 0.528248065  | 4.57E-40  | postive  |
| IREB2     | AL049840.3 | 0.473926477  | 1.57E-31  | postive  |
| GABPB1    | AL049840.3 | 0.58227772   | 3.06E-50  | postive  |
| PIK3CA    | AL049840.3 | 0.428244086  | 1.89E-25  | postive  |
| ZEB1      | AL049840.3 | 0.601145013  | 2.92E-54  | postive  |
| MAPK8     | AL049840.3 | 0.569727132  | 1.04E-47  | postive  |
| LINC00472 | AL049840.3 | 0.472600529  | 2.43E-31  | postive  |
| TLR4      | AL049840.3 | 0.432324173  | 5.90E-26  | postive  |
| ATM       | AL049840.3 | 0.67560929   | 4.15E-73  | postive  |
| YY1AP1    | AL049840.3 | 0.410661329  | 2.41E-23  | postive  |
| FBXW7     | AL049840.3 | 0.564095779  | 1.32E-46  | postive  |
| HELLS     | KANSL1L-AS | 0.583614457  | 1.62E-50  | postive  |
| ZNF419    | KANSL1L-AS | 0.413048586  | 1.27E-23  | postive  |
| TUBE1     | KANSL1L-AS | 0.570898316  | 6.12E-48  | postive  |
| ALOX12    | KANSL1L-AS | 0.57575071   | 6.56E-49  | postive  |
| GABPB1    | KANSL1L-AS | 0.596457603  | 3.08E-53  | postive  |
| MAPK8     | KANSL1L-AS | 0.450433345  | 2.74E-28  | postive  |
| LINC00472 | KANSL1L-AS | 0.701776542  | 4.00E-81  | postive  |
| ATM       | KANSL1L-AS | 0.783371321  | 5.50E-113 | postive  |
| FBXW7     | KANSL1L-AS | 0.528435141  | 4.25E-40  | postive  |
| FANCD2    | AC008764.6 | 0.461113642  | 9.88E-30  | postive  |
| ALOX12    | AC008764.6 | 0.424589616  | 5.31E-25  | postive  |
| TFAP2C    | AC008764.6 | 0.533205246  | 6.34E-41  | postive  |
| HBA1      | AC008764.6 | 0.439542381  | 7.20E-27  | postive  |
| RPL8      | SNHG5      | 0.484990677  | 3.79E-33  | postive  |
| BECN1     | AC009812.4 | -0.449333198 | 3.83E-28  | negative |
| EPAS1     | AL390955.2 | 0.413493951  | 1.13E-23  | postive  |
| HELLS     | RERE-AS1   | 0.498695543  | 3.11E-35  | postive  |
| ZNF419    | RERE-AS1   | 0.422448827  | 9.65E-25  | postive  |
| TUBE1     | RERE-AS1   | 0.517407452  | 3.08E-38  | postive  |
| ALOX12    | RERE-AS1   | 0.505662414  | 2.49E-36  | postive  |
| GABPB1    | RERE-AS1   | 0.565067308  | 8.54E-47  | postive  |
| LINC00472 | RERE-AS1   | 0.726196271  | 1.93E-89  | postive  |
| ATM       | RERE-AS1   | 0.666119848  | 2.11E-70  | postive  |
| FBXW7     | RERE-AS1   | 0.504596032  | 3.68E-36  | postive  |
| PHKG2     | AC007383.1 | 0.479766878  | 2.23E-32  | postive  |
| TAZ       | AC007383.1 | 0.502015543  | 9.40E-36  | postive  |
| BRD4      | SEMA3F-AS1 | 0.448752867  | 4.57E-28  | postive  |
| ZNF419    | SEMA3F-AS1 | 0.617250631  | 6.52E-58  | postive  |
| VEGFA     | SEMA3F-AS1 | 0.493276425  | 2.13E-34  | postive  |
| TUBE1     | SEMA3F-AS1 | 0.624132499  | 1.54E-59  | postive  |
| SETD1B    | SEMA3F-AS1 | 0.511905975  | 2.46E-37  | postive  |
| ALOX12    | SEMA3F-AS1 | 0.636537712  | 1.43E-62  | postive  |
| GABPB1    | SEMA3F-AS1 | 0.531302829  | 1.36E-40  | postive  |
| ATM       | SEMA3F-AS1 | 0.481937997  | 1.07E-32  | postive  |
| TAZ       | SEMA3F-AS1 | 0.476272327  | 7.20E-32  | postive  |
| FBXW7     | SEMA3F-AS1 | 0.544308095  | 6.72E-43  | postive  |
| FANCD2    | AC010618.2 | 0.420857594  | 1.50E-24  | postive  |
| ALOX12    | AC010618.2 | 0.43062429   | 9.60E-26  | postive  |
| TFAP2C    | AC010618.2 | 0.527116421  | 7.14E-40  | postive  |
| HBA1      | AC010618.2 | 0.475677272  | 8.77E-32  | postive  |

|           |             |              |          |          |
|-----------|-------------|--------------|----------|----------|
| DUOX1     | AC010618.2  | 0.418954819  | 2.54E-24 | postive  |
| BRD4      | PKD1P6-NPII | 0.40745976   | 5.66E-23 | postive  |
| ZNF419    | PKD1P6-NPII | 0.413130313  | 1.24E-23 | postive  |
| VEGFA     | PKD1P6-NPII | 0.551742884  | 2.91E-44 | postive  |
| TUBE1     | PKD1P6-NPII | 0.427184293  | 2.56E-25 | postive  |
| SETD1B    | PKD1P6-NPII | 0.479755295  | 2.24E-32 | postive  |
| ALOX12    | PKD1P6-NPII | 0.536257073  | 1.85E-41 | postive  |
| NCOA4     | PKD1P6-NPII | -0.408032246 | 4.86E-23 | negative |
| PHKG2     | PKD1P6-NPII | 0.477581616  | 4.65E-32 | postive  |
| TAZ       | PKD1P6-NPII | 0.613914415  | 3.87E-57 | postive  |
| ZNF419    | AC022762.2  | 0.478545544  | 3.37E-32 | postive  |
| TUBE1     | AC022762.2  | 0.523038486  | 3.52E-39 | postive  |
| ALOX12    | AC022762.2  | 0.543165453  | 1.08E-42 | postive  |
| PHKG2     | AC022762.2  | 0.552906023  | 1.77E-44 | postive  |
| TAZ       | AC022762.2  | 0.67687047   | 1.78E-73 | postive  |
| HELLS     | AC069549.1  | 0.466816984  | 1.60E-30 | postive  |
| GABPB1    | AC069549.1  | 0.436934924  | 1.55E-26 | postive  |
| LINC00472 | AC069549.1  | 0.517338713  | 3.16E-38 | postive  |
| ATM       | AC069549.1  | 0.567577313  | 2.76E-47 | postive  |
| PML       | AC012645.3  | 0.41261598   | 1.43E-23 | postive  |
| ALOX12    | AC012645.3  | 0.465278201  | 2.62E-30 | postive  |
| PHKG2     | AC012645.3  | 0.454717613  | 7.33E-29 | postive  |
| IFNG      | AC012645.3  | 0.454621449  | 7.55E-29 | postive  |
| TAZ       | AC012645.3  | 0.518898865  | 1.74E-38 | postive  |
| NCOA4     | AC092757.3  | -0.417800653 | 3.49E-24 | negative |
| PHKG2     | AC092757.3  | 0.474046142  | 1.51E-31 | postive  |
| ULK1      | AC092757.3  | 0.404276273  | 1.31E-22 | postive  |
| HELLS     | AC005899.7  | 0.513812313  | 1.20E-37 | postive  |
| ZNF419    | AC005899.7  | 0.406040427  | 8.23E-23 | postive  |
| TUBE1     | AC005899.7  | 0.483747207  | 5.80E-33 | postive  |
| ALOX12    | AC005899.7  | 0.520800452  | 8.38E-39 | postive  |
| GABPB1    | AC005899.7  | 0.496606391  | 6.56E-35 | postive  |
| LINC00472 | AC005899.7  | 0.471209562  | 3.83E-31 | postive  |
| ATM       | AC005899.7  | 0.645843799  | 6.09E-65 | postive  |
| FBXW7     | AC005899.7  | 0.483094847  | 7.24E-33 | postive  |
| HELLS     | AC005730.3  | 0.412079693  | 1.65E-23 | postive  |
| TFAP2C    | AC005730.3  | 0.509860963  | 5.28E-37 | postive  |
| HBA1      | AC005730.3  | 0.462018564  | 7.41E-30 | postive  |
| DUOX1     | AC005730.3  | 0.440764153  | 5.02E-27 | postive  |
| LINC00472 | AC005730.3  | 0.414021498  | 9.76E-24 | postive  |
| CHMP5     | LINC00997   | -0.408043214 | 4.85E-23 | negative |
| STEAP3    | LINC00997   | 0.416126373  | 5.51E-24 | postive  |
| BID       | LINC00997   | 0.413268877  | 1.20E-23 | postive  |
| HELLS     | AC108463.3  | 0.492819437  | 2.50E-34 | postive  |
| ZNF419    | AC108463.3  | 0.409569989  | 3.23E-23 | postive  |
| ZFP69B    | AC108463.3  | 0.405170515  | 1.03E-22 | postive  |
| TUBE1     | AC108463.3  | 0.459945532  | 1.43E-29 | postive  |
| ALOX12    | AC108463.3  | 0.4897046    | 7.44E-34 | postive  |
| GABPB1    | AC108463.3  | 0.540987485  | 2.66E-42 | postive  |
| LINC00472 | AC108463.3  | 0.474556685  | 1.27E-31 | postive  |
| ATM       | AC108463.3  | 0.678115851  | 7.70E-74 | postive  |
| FBXW7     | AC108463.3  | 0.526214266  | 1.02E-39 | postive  |
| GPX4      | AC138696.2  | 0.535394652  | 2.62E-41 | postive  |
| HSPB1     | AC138696.2  | 0.654969662  | 2.39E-67 | postive  |
| IREB2     | AC138696.2  | -0.431732216 | 6.99E-26 | negative |
| NOX1      | AC138696.2  | 0.41724258   | 4.06E-24 | postive  |
| PIK3CA    | AC138696.2  | -0.422017731 | 1.09E-24 | negative |
| NRAS      | AC138696.2  | -0.41248158  | 1.48E-23 | negative |

|           |            |              |           |          |
|-----------|------------|--------------|-----------|----------|
| KRAS      | AC138696.2 | -0.405437912 | 9.64E-23  | negative |
| HRAS      | AC138696.2 | 0.57904388   | 1.41E-49  | postive  |
| NCOA4     | AC138696.2 | -0.423720994 | 6.77E-25  | negative |
| PHKG2     | AC138696.2 | 0.522348366  | 4.60E-39  | postive  |
| BECN1     | AC138696.2 | -0.44447448  | 1.66E-27  | negative |
| PRKAA1    | AC138696.2 | -0.451442912 | 2.01E-28  | negative |
| SIRT1     | AC138696.2 | -0.453562242 | 1.05E-28  | negative |
| LONP1     | AC138696.2 | 0.420645617  | 1.59E-24  | postive  |
| HELLS     | AL136320.1 | 0.522064677  | 5.14E-39  | postive  |
| TUBE1     | AL136320.1 | 0.400770574  | 3.26E-22  | postive  |
| GABPB1    | AL136320.1 | 0.498491277  | 3.35E-35  | postive  |
| ATG7      | AL136320.1 | 0.473061449  | 2.08E-31  | postive  |
| LINC00472 | AL136320.1 | 0.552959135  | 1.73E-44  | postive  |
| ATM       | AL136320.1 | 0.697964773  | 6.66E-80  | postive  |
| FBXW7     | AL136320.1 | 0.424110084  | 6.07E-25  | postive  |
| TAZ       | AC019257.1 | 0.435014414  | 2.71E-26  | postive  |
| TFAP2C    | AC044840.1 | 0.523151526  | 3.37E-39  | postive  |
| HBA1      | AC044840.1 | 0.473500898  | 1.80E-31  | postive  |
| DUOX1     | AC044840.1 | 0.433801519  | 3.85E-26  | postive  |
| MUC1      | AL139280.1 | 0.449437722  | 3.71E-28  | postive  |
| SOCS1     | AL139280.1 | 0.473888862  | 1.59E-31  | postive  |
| DDIT3     | LINC01055  | 0.439674269  | 6.93E-27  | postive  |
| GABARAPL1 | LINC01055  | 0.449340985  | 3.82E-28  | postive  |
| ATM       | MGAT3-AS1  | 0.552424154  | 2.17E-44  | postive  |
| VEGFA     | AP001626.1 | 0.404369449  | 1.28E-22  | postive  |
| HELLS     | AC117383.1 | 0.407429351  | 5.70E-23  | postive  |
| ATM       | AC117383.1 | 0.433584039  | 4.10E-26  | postive  |
| HELLS     | AC131159.1 | 0.517776102  | 2.67E-38  | postive  |
| TUBE1     | AC131159.1 | 0.555168863  | 6.66E-45  | postive  |
| ALOX12    | AC131159.1 | 0.536052082  | 2.01E-41  | postive  |
| GABPB1    | AC131159.1 | 0.487237856  | 1.75E-33  | postive  |
| LINC00472 | AC131159.1 | 0.477986675  | 4.06E-32  | postive  |
| ATM       | AC131159.1 | 0.670403425  | 1.30E-71  | postive  |
| FBXW7     | AC131159.1 | 0.44069875   | 5.12E-27  | postive  |
| FANCD2    | AL035587.1 | 0.503724217  | 5.05E-36  | postive  |
| HELLS     | AL035587.1 | 0.481212508  | 1.37E-32  | postive  |
| ZNF419    | AL035587.1 | 0.452176836  | 1.61E-28  | postive  |
| ALOX12    | AL035587.1 | 0.516681096  | 4.06E-38  | postive  |
| ATM       | AL035587.1 | 0.422682649  | 9.05E-25  | postive  |
| FBXW7     | AL035587.1 | 0.409863198  | 2.99E-23  | postive  |
| TFAP2C    | AC037198.2 | 0.428273584  | 1.88E-25  | postive  |
| HBA1      | AC037198.2 | 0.422087915  | 1.07E-24  | postive  |
| HELLS     | AL589935.1 | 0.502793031  | 7.09E-36  | postive  |
| KLHL24    | AL589935.1 | 0.401731462  | 2.54E-22  | postive  |
| TUBE1     | AL589935.1 | 0.502507774  | 7.86E-36  | postive  |
| ALOX12    | AL589935.1 | 0.438095637  | 1.10E-26  | postive  |
| GABPB1    | AL589935.1 | 0.560385717  | 6.82E-46  | postive  |
| MAPK8     | AL589935.1 | 0.412577321  | 1.44E-23  | postive  |
| LINC00472 | AL589935.1 | 0.807343362  | 4.07E-125 | postive  |
| ATM       | AL589935.1 | 0.699097388  | 2.90E-80  | postive  |
| FBXW7     | AL589935.1 | 0.485637823  | 3.04E-33  | postive  |
| HELLS     | AC139887.4 | 0.430643023  | 9.55E-26  | postive  |
| ZNF419    | AC139887.4 | 0.418756977  | 2.68E-24  | postive  |
| KLHL24    | AC139887.4 | 0.44430483   | 1.75E-27  | postive  |
| TUBE1     | AC139887.4 | 0.452477465  | 1.46E-28  | postive  |
| ALOX12    | AC139887.4 | 0.441957053  | 3.52E-27  | postive  |
| GABPB1    | AC139887.4 | 0.545432229  | 4.20E-43  | postive  |
| LINC00472 | AC139887.4 | 0.858748608  | 4.59E-158 | postive  |

|           |            |             |          |         |
|-----------|------------|-------------|----------|---------|
| ATM       | AC139887.4 | 0.613602366 | 4.57E-57 | postive |
| FBXW7     | AC139887.4 | 0.4412329   | 4.37E-27 | postive |
| ALOX12    | LRRC8C-DT  | 0.44205327  | 3.42E-27 | postive |
| GABPB1    | LRRC8C-DT  | 0.566886809 | 3.77E-47 | postive |
| ZEB1      | LRRC8C-DT  | 0.507721223 | 1.17E-36 | postive |
| MAPK8     | LRRC8C-DT  | 0.40535592  | 9.85E-23 | postive |
| ATM       | LRRC8C-DT  | 0.591723926 | 3.20E-52 | postive |
| FBXW7     | LRRC8C-DT  | 0.485849051 | 2.82E-33 | postive |
| MTOR      | SUCLG2-AS1 | 0.554296618 | 9.70E-45 | postive |
| ACSL3     | SUCLG2-AS1 | 0.46226665  | 6.85E-30 | postive |
| HIF1A     | SUCLG2-AS1 | 0.424700553 | 5.15E-25 | postive |
| OXR1      | SUCLG2-AS1 | 0.408206401 | 4.64E-23 | postive |
| KLHL24    | SUCLG2-AS1 | 0.616388763 | 1.04E-57 | postive |
| MAP3K5    | SUCLG2-AS1 | 0.420179862 | 1.81E-24 | postive |
| EIF2AK4   | SUCLG2-AS1 | 0.405141172 | 1.04E-22 | postive |
| IREB2     | SUCLG2-AS1 | 0.540112539 | 3.82E-42 | postive |
| PIK3CA    | SUCLG2-AS1 | 0.563061427 | 2.09E-46 | postive |
| ATG5      | SUCLG2-AS1 | 0.408242628 | 4.60E-23 | postive |
| ATG7      | SUCLG2-AS1 | 0.487695055 | 1.49E-33 | postive |
| LINC00472 | SUCLG2-AS1 | 0.520119026 | 1.09E-38 | postive |
| PRKAA2    | SUCLG2-AS1 | 0.445243285 | 1.32E-27 | postive |
| PRKAA1    | SUCLG2-AS1 | 0.424462574 | 5.50E-25 | postive |
| TGFR1     | SUCLG2-AS1 | 0.451291342 | 2.11E-28 | postive |
| LPIN1     | SUCLG2-AS1 | 0.507959971 | 1.07E-36 | postive |
| ATM       | SUCLG2-AS1 | 0.472840855 | 2.24E-31 | postive |
| TRIB3     | AC107021.2 | 0.429987092 | 1.15E-25 | postive |
| SLC2A1    | AC107021.2 | 0.402681831 | 1.98E-22 | postive |
| HELLS     | KLF7-IT1   | 0.528629838 | 3.93E-40 | postive |
| TUBE1     | KLF7-IT1   | 0.416800485 | 4.59E-24 | postive |
| IREB2     | KLF7-IT1   | 0.404950851 | 1.10E-22 | postive |
| GABPB1    | KLF7-IT1   | 0.552415822 | 2.18E-44 | postive |
| ATG7      | KLF7-IT1   | 0.469001906 | 7.87E-31 | postive |
| MAPK8     | KLF7-IT1   | 0.413459984 | 1.14E-23 | postive |
| LINC00472 | KLF7-IT1   | 0.700516194 | 1.02E-80 | postive |
| ATM       | KLF7-IT1   | 0.742050661 | 2.44E-95 | postive |
| FBXW7     | KLF7-IT1   | 0.469885495 | 5.90E-31 | postive |
| TFAP2C    | AC002310.1 | 0.45696402  | 3.64E-29 | postive |
| HBA1      | AC002310.1 | 0.499050714 | 2.74E-35 | postive |
| HELLS     | AC084781.1 | 0.460034862 | 1.39E-29 | postive |
| ALOX12    | AC084781.1 | 0.450612399 | 2.59E-28 | postive |
| ATM       | AC084781.1 | 0.438851794 | 8.83E-27 | postive |
| HELLS     | AC112503.2 | 0.444268287 | 1.77E-27 | postive |
| TUBE1     | AC112503.2 | 0.481351075 | 1.31E-32 | postive |
| ALOX12    | AC112503.2 | 0.47369615  | 1.69E-31 | postive |
| GABPB1    | AC112503.2 | 0.478966581 | 2.92E-32 | postive |
| LINC00472 | AC112503.2 | 0.465875263 | 2.16E-30 | postive |
| ATM       | AC112503.2 | 0.659733589 | 1.23E-68 | postive |
| FBXW7     | AC112503.2 | 0.402171003 | 2.27E-22 | postive |
| RB1       | AC003984.1 | 0.420218907 | 1.79E-24 | postive |
| TUBE1     | AC003984.1 | 0.429293491 | 1.40E-25 | postive |
| MAPK8     | AC003984.1 | 0.447720881 | 6.25E-28 | postive |
| PRKAA2    | AC003984.1 | 0.51290549  | 1.69E-37 | postive |
| ATM       | AC003984.1 | 0.402475098 | 2.09E-22 | postive |
| SIRT1     | AC003984.1 | 0.473235688 | 1.97E-31 | postive |
| HELLS     | AC019080.1 | 0.490657465 | 5.34E-34 | postive |
| TUBE1     | AC019080.1 | 0.503249022 | 6.01E-36 | postive |
| ALOX12    | AC019080.1 | 0.454830431 | 7.07E-29 | postive |
| GABPB1    | AC019080.1 | 0.43812575  | 1.09E-26 | postive |

|           |            |              |           |          |
|-----------|------------|--------------|-----------|----------|
| MAPK8     | AC019080.1 | 0.42384434   | 6.54E-25  | postive  |
| LINC00472 | AC019080.1 | 0.456840917  | 3.78E-29  | postive  |
| ATM       | AC019080.1 | 0.644988017  | 1.01E-64  | postive  |
| FBXW7     | AC019080.1 | 0.411420353  | 1.97E-23  | postive  |
| HELLS     | AC007497.1 | 0.422459164  | 9.63E-25  | postive  |
| PHKG2     | AC007497.1 | 0.416635235  | 4.80E-24  | postive  |
| PML       | AL022328.3 | 0.413289015  | 1.19E-23  | postive  |
| BRD4      | AL022328.3 | 0.479581695  | 2.38E-32  | postive  |
| ZNF419    | AL022328.3 | 0.538112848  | 8.67E-42  | postive  |
| TUBE1     | AL022328.3 | 0.455723206  | 5.36E-29  | postive  |
| SETD1B    | AL022328.3 | 0.474246625  | 1.41E-31  | postive  |
| ALOX12    | AL022328.3 | 0.559765177  | 8.97E-46  | postive  |
| PHKG2     | AL022328.3 | 0.535779575  | 2.24E-41  | postive  |
| EGLN2     | AL022328.3 | 0.441536903  | 3.99E-27  | postive  |
| TAZ       | AL022328.3 | 0.629476365  | 7.92E-61  | postive  |
| FBXW7     | AL022328.3 | 0.418729285  | 2.70E-24  | postive  |
| TFAP2C    | LINC02848  | 0.545612751  | 3.89E-43  | postive  |
| HBA1      | LINC02848  | 0.524734041  | 1.82E-39  | postive  |
| HELLS     | AC103591.3 | 0.507818099  | 1.13E-36  | postive  |
| TUBE1     | AC103591.3 | 0.506958588  | 1.54E-36  | postive  |
| ALOX12    | AC103591.3 | 0.422855752  | 8.62E-25  | postive  |
| GABPB1    | AC103591.3 | 0.483209463  | 6.96E-33  | postive  |
| ATM       | AC103591.3 | 0.57973743   | 1.02E-49  | postive  |
| FBXW7     | AC103591.3 | 0.460765012  | 1.10E-29  | postive  |
| STEAP3    | DAAM2-AS1  | 0.413046243  | 1.27E-23  | postive  |
| ZNF419    | AL354836.1 | 0.46291301   | 5.58E-30  | postive  |
| DRD4      | AL354836.1 | 0.463776144  | 4.24E-30  | postive  |
| ALOX12    | AL354836.1 | 0.419058051  | 2.47E-24  | postive  |
| NCOA4     | AL354836.1 | -0.438552945 | 9.64E-27  | negative |
| PHKG2     | AL354836.1 | 0.643562186  | 2.36E-64  | postive  |
| EGLN2     | AL354836.1 | 0.401967777  | 2.39E-22  | postive  |
| TAZ       | AL354836.1 | 0.719084748  | 6.30E-87  | postive  |
| GPX4      | AC242842.1 | 0.42199667   | 1.09E-24  | postive  |
| PHKG2     | AC242842.1 | 0.499892967  | 2.02E-35  | postive  |
| HELLS     | AP000919.1 | 0.465676275  | 2.30E-30  | postive  |
| GABPB1    | AP000919.1 | 0.423121113  | 8.00E-25  | postive  |
| ATG7      | AP000919.1 | 0.424632683  | 5.24E-25  | postive  |
| LINC00472 | AP000919.1 | 0.476360839  | 6.99E-32  | postive  |
| ATM       | AP000919.1 | 0.657491053  | 5.01E-68  | postive  |
| FBXW7     | AP000919.1 | 0.411442388  | 1.96E-23  | postive  |
| HELLS     | AL133406.2 | 0.40492093   | 1.10E-22  | postive  |
| ZNF419    | AL133406.2 | 0.470222212  | 5.29E-31  | postive  |
| VEGFA     | AL133406.2 | 0.440039589  | 6.22E-27  | postive  |
| TUBE1     | AL133406.2 | 0.558172729  | 1.80E-45  | postive  |
| SETD1B    | AL133406.2 | 0.468537164  | 9.15E-31  | postive  |
| ALOX12    | AL133406.2 | 0.564089013  | 1.32E-46  | postive  |
| GABPB1    | AL133406.2 | 0.425438494  | 4.18E-25  | postive  |
| ATM       | AL133406.2 | 0.496561018  | 6.67E-35  | postive  |
| FBXW7     | AL133406.2 | 0.507095948  | 1.47E-36  | postive  |
| GABPB1    | AC011389.1 | 0.491232876  | 4.37E-34  | postive  |
| LINC00472 | AC011389.1 | 0.775835189  | 1.73E-109 | postive  |
| ATM       | AC011389.1 | 0.439318164  | 7.69E-27  | postive  |
| TFAP2C    | AC007993.2 | 0.603135815  | 1.06E-54  | postive  |
| HBA1      | AC007993.2 | 0.497378071  | 4.98E-35  | postive  |
| AKR1C2    | ZMIZ1-AS1  | 0.452392476  | 1.50E-28  | postive  |
| NQO1      | ZMIZ1-AS1  | 0.493500733  | 1.97E-34  | postive  |
| STEAP3    | ZMIZ1-AS1  | 0.410181715  | 2.74E-23  | postive  |
| G6PD      | ZMIZ1-AS1  | 0.4433327    | 2.34E-27  | postive  |

|           |            |             |          |         |
|-----------|------------|-------------|----------|---------|
| FANCD2    | AC016831.1 | 0.440012257 | 6.27E-27 | postive |
| HELLS     | AC016831.1 | 0.464076097 | 3.85E-30 | postive |
| STMN1     | AC016831.1 | 0.517758393 | 2.69E-38 | postive |
| RRM2      | AC016831.1 | 0.420988305 | 1.45E-24 | postive |
| AURKA     | AC016831.1 | 0.444494458 | 1.65E-27 | postive |
| CDKN2A    | AC016831.1 | 0.585931745 | 5.34E-51 | postive |
| LINC00472 | AC016831.1 | 0.446412284 | 9.29E-28 | postive |
| HELLS     | AC005021.1 | 0.542438942 | 1.46E-42 | postive |
| TUBE1     | AC005021.1 | 0.438140529 | 1.09E-26 | postive |
| ALOX12    | AC005021.1 | 0.480668885 | 1.65E-32 | postive |
| GABPB1    | AC005021.1 | 0.483505759 | 6.29E-33 | postive |
| LINC00472 | AC005021.1 | 0.447863291 | 5.99E-28 | postive |
| ATM       | AC005021.1 | 0.664595642 | 5.62E-70 | postive |
| FBXW7     | AC005021.1 | 0.480429811 | 1.79E-32 | postive |
| ZNF419    | AC009093.6 | 0.41263344  | 1.42E-23 | postive |
| LPIN1     | AC009093.6 | 0.434451034 | 3.19E-26 | postive |
| FANCD2    | AC145285.3 | 0.410921579 | 2.25E-23 | postive |
| TFAP2C    | AC145285.3 | 0.548184453 | 1.32E-43 | postive |
| HBA1      | AC145285.3 | 0.494062825 | 1.62E-34 | postive |
| DUOX1     | AC145285.3 | 0.424051558 | 6.17E-25 | postive |
| ZNF419    | AC124319.1 | 0.40585354  | 8.64E-23 | postive |
| TUBE1     | AC124319.1 | 0.446025707 | 1.04E-27 | postive |
| ALOX12    | AC124319.1 | 0.452138292 | 1.62E-28 | postive |
| PHKG2     | AC124319.1 | 0.407795415 | 5.17E-23 | postive |
| LINC00472 | AC124319.1 | 0.475318055 | 9.88E-32 | postive |
| TAZ       | AC124319.1 | 0.44165773  | 3.85E-27 | postive |
| FANCD2    | AC005911.1 | 0.423867022 | 6.50E-25 | postive |
| TFAP2C    | AC005911.1 | 0.54053672  | 3.21E-42 | postive |
| HBA1      | AC005911.1 | 0.506719488 | 1.69E-36 | postive |
| JDP2      | RASAL2-AS1 | 0.496567985 | 6.65E-35 | postive |
| GABPB1    | RASAL2-AS1 | 0.505920255 | 2.26E-36 | postive |
| ZEB1      | RASAL2-AS1 | 0.610843201 | 1.96E-56 | postive |
| MAPK8     | RASAL2-AS1 | 0.503910903 | 4.72E-36 | postive |
| EPAS1     | RASAL2-AS1 | 0.518093089 | 2.37E-38 | postive |
| HELLS     | AC006566.1 | 0.512600048 | 1.90E-37 | postive |
| GABPB1    | AC006566.1 | 0.502603751 | 7.60E-36 | postive |
| ATG7      | AC006566.1 | 0.425628844 | 3.96E-25 | postive |
| LINC00472 | AC006566.1 | 0.564937164 | 9.05E-47 | postive |
| ATM       | AC006566.1 | 0.68070517  | 1.33E-74 | postive |
| FBXW7     | AC006566.1 | 0.43671999  | 1.65E-26 | postive |
| ATF4      | SNHG1      | 0.469555327 | 6.57E-31 | postive |
| TAZ       | SNHG1      | 0.409939088 | 2.93E-23 | postive |
| KLHL24    | SREBF2-AS1 | 0.414070884 | 9.63E-24 | postive |
| GABARAPL1 | SREBF2-AS1 | 0.404721439 | 1.16E-22 | postive |
| LINC00472 | SREBF2-AS1 | 0.563560765 | 1.67E-46 | postive |
| LPIN1     | SREBF2-AS1 | 0.495100907 | 1.12E-34 | postive |
| HELLS     | AC004253.1 | 0.430291632 | 1.06E-25 | postive |
| ZNF419    | AC004253.1 | 0.559565016 | 9.79E-46 | postive |
| VEGFA     | AC004253.1 | 0.477553558 | 4.69E-32 | postive |
| TUBE1     | AC004253.1 | 0.670612216 | 1.14E-71 | postive |
| DRD4      | AC004253.1 | 0.422843367 | 8.65E-25 | postive |
| ALOX12    | AC004253.1 | 0.678162248 | 7.46E-74 | postive |
| GABPB1    | AC004253.1 | 0.405694372 | 9.01E-23 | postive |
| PHKG2     | AC004253.1 | 0.485801802 | 2.87E-33 | postive |
| ATM       | AC004253.1 | 0.441841026 | 3.65E-27 | postive |
| TAZ       | AC004253.1 | 0.656884371 | 7.31E-68 | postive |
| FBXW7     | AC004253.1 | 0.474717122 | 1.21E-31 | postive |
| FANCD2    | GCC2-AS1   | 0.428935847 | 1.55E-25 | postive |

|           |            |              |           |          |
|-----------|------------|--------------|-----------|----------|
| TFAP2C    | GCC2-AS1   | 0.525749001  | 1.22E-39  | postive  |
| LPIN1     | GCC2-AS1   | 0.408253332  | 4.58E-23  | postive  |
| HELLS     | AC010542.5 | 0.460778416  | 1.10E-29  | postive  |
| ZNF419    | AC010542.5 | 0.541421529  | 2.23E-42  | postive  |
| TUBE1     | AC010542.5 | 0.532311314  | 9.07E-41  | postive  |
| ALOX12    | AC010542.5 | 0.510177815  | 4.69E-37  | postive  |
| YWHAE     | AC010542.5 | -0.409400437 | 3.38E-23  | negative |
| GABPB1    | AC010542.5 | 0.434784262  | 2.90E-26  | postive  |
| PHKG2     | AC010542.5 | 0.547235005  | 1.97E-43  | postive  |
| ATM       | AC010542.5 | 0.45602991   | 4.87E-29  | postive  |
| TAZ       | AC010542.5 | 0.611194046  | 1.63E-56  | postive  |
| FBXW7     | AC010542.5 | 0.476471564  | 6.74E-32  | postive  |
| GABPB1    | LINC01465  | 0.40249883   | 2.08E-22  | postive  |
| LINC00472 | LINC01465  | 0.457073699  | 3.52E-29  | postive  |
| ATM       | LINC01465  | 0.431713551  | 7.03E-26  | postive  |
| HELLS     | AC073046.1 | 0.443087882  | 2.52E-27  | postive  |
| MTOR      | AC073046.1 | 0.506299632  | 1.97E-36  | postive  |
| ZFP69B    | AC073046.1 | 0.514919355  | 7.91E-38  | postive  |
| ALOX12    | AC073046.1 | 0.480919667  | 1.51E-32  | postive  |
| IREB2     | AC073046.1 | 0.469463865  | 6.77E-31  | postive  |
| SP1       | AC073046.1 | 0.446211435  | 9.87E-28  | postive  |
| GABPB1    | AC073046.1 | 0.446110282  | 1.02E-27  | postive  |
| CYBB      | AC073046.1 | 0.424593081  | 5.30E-25  | postive  |
| ATG7      | AC073046.1 | 0.496883363  | 5.94E-35  | postive  |
| ULK2      | AC073046.1 | 0.423345081  | 7.52E-25  | postive  |
| MAPK8     | AC073046.1 | 0.449133377  | 4.07E-28  | postive  |
| TLR4      | AC073046.1 | 0.491709205  | 3.70E-34  | postive  |
| ATM       | AC073046.1 | 0.794828754  | 1.39E-118 | postive  |
| FBXW7     | AC073046.1 | 0.517612578  | 2.85E-38  | postive  |
| BACH1     | AC073046.1 | 0.437786163  | 1.21E-26  | postive  |
| LINC00472 | AC107952.2 | 0.414663612  | 8.20E-24  | postive  |
| HELLS     | AC093484.4 | 0.574896379  | 9.74E-49  | postive  |
| ZNF419    | AC093484.4 | 0.522357837  | 4.59E-39  | postive  |
| TUBE1     | AC093484.4 | 0.516541097  | 4.28E-38  | postive  |
| ALOX12    | AC093484.4 | 0.585376717  | 6.97E-51  | postive  |
| GABPB1    | AC093484.4 | 0.508826522  | 7.75E-37  | postive  |
| LINC00472 | AC093484.4 | 0.508746695  | 7.98E-37  | postive  |
| ATM       | AC093484.4 | 0.540573243  | 3.16E-42  | postive  |
| FBXW7     | AC093484.4 | 0.463353957  | 4.85E-30  | postive  |
| HSPB1     | AL161729.3 | 0.502387517  | 8.22E-36  | postive  |
| HBA1      | AL161729.3 | 0.632896317  | 1.15E-61  | postive  |
| HRAS      | AL161729.3 | 0.654186785  | 3.88E-67  | postive  |
| MAP1LC3A  | AL161729.3 | 0.470467454  | 4.88E-31  | postive  |
| EGLN2     | AL161729.3 | 0.822004407  | 2.06E-133 | postive  |
| FANCD2    | AC006064.1 | 0.440013082  | 6.27E-27  | postive  |
| HELLS     | AC006064.1 | 0.492317234  | 2.99E-34  | postive  |
| ZNF419    | AC006064.1 | 0.507784105  | 1.14E-36  | postive  |
| ZFP69B    | AC006064.1 | 0.402553964  | 2.05E-22  | postive  |
| TUBE1     | AC006064.1 | 0.516003767  | 5.25E-38  | postive  |
| SETD1B    | AC006064.1 | 0.482131091  | 1.00E-32  | postive  |
| ALOX12    | AC006064.1 | 0.691242252  | 8.55E-78  | postive  |
| GABPB1    | AC006064.1 | 0.451242969  | 2.14E-28  | postive  |
| ATM       | AC006064.1 | 0.603019306  | 1.12E-54  | postive  |
| FBXW7     | AC006064.1 | 0.464865448  | 2.99E-30  | postive  |
| HELLS     | AC012442.1 | 0.553962624  | 1.12E-44  | postive  |
| TUBE1     | AC012442.1 | 0.415606789  | 6.35E-24  | postive  |
| ALOX12    | AC012442.1 | 0.484252451  | 4.88E-33  | postive  |
| GABPB1    | AC012442.1 | 0.412525535  | 1.46E-23  | postive  |

|           |            |             |           |         |
|-----------|------------|-------------|-----------|---------|
| LINC00472 | AC012442.1 | 0.420032184 | 1.89E-24  | postive |
| ATM       | AC012442.1 | 0.473663168 | 1.71E-31  | postive |
| TFAP2C    | TFPI2-DT   | 0.52951069  | 2.77E-40  | postive |
| HBA1      | TFPI2-DT   | 0.506206319 | 2.04E-36  | postive |
| ZNF419    | TSC22D1-AS | 0.50539483  | 2.74E-36  | postive |
| KLHL24    | TSC22D1-AS | 0.491706346 | 3.70E-34  | postive |
| ALOX12    | TSC22D1-AS | 0.412336748 | 1.54E-23  | postive |
| GABPB1    | TSC22D1-AS | 0.530861573 | 1.62E-40  | postive |
| LINC00472 | TSC22D1-AS | 0.78572743  | 4.15E-114 | postive |
| LPIN1     | TSC22D1-AS | 0.47637284  | 6.96E-32  | postive |
| ATM       | TSC22D1-AS | 0.418437419 | 2.93E-24  | postive |
| HELLS     | AC015727.1 | 0.570144301 | 8.63E-48  | postive |
| ZNF419    | AC015727.1 | 0.471020696 | 4.07E-31  | postive |
| TUBE1     | AC015727.1 | 0.549421501 | 7.81E-44  | postive |
| ALOX12    | AC015727.1 | 0.622595836 | 3.59E-59  | postive |
| GABPB1    | AC015727.1 | 0.562563642 | 2.61E-46  | postive |
| MAPK8     | AC015727.1 | 0.426914301 | 2.76E-25  | postive |
| LINC00472 | AC015727.1 | 0.661283687 | 4.63E-69  | postive |
| ATM       | AC015727.1 | 0.683549158 | 1.88E-75  | postive |
| FBXW7     | AC015727.1 | 0.511596702 | 2.76E-37  | postive |
| GABPB1    | AC002044.1 | 0.408092941 | 4.78E-23  | postive |
| LINC00472 | AC002044.1 | 0.630170835 | 5.36E-61  | postive |
| TUBE1     | PSMB8-AS1  | 0.428512495 | 1.75E-25  | postive |
| PHKG2     | PSMB8-AS1  | 0.419306941 | 2.31E-24  | postive |
| IFNG      | PSMB8-AS1  | 0.479251885 | 2.66E-32  | postive |
| TAZ       | PSMB8-AS1  | 0.46577399  | 2.23E-30  | postive |
| RPL8      | OSER1-DT   | 0.531712067 | 1.15E-40  | postive |
| HRAS      | OSER1-DT   | 0.413519625 | 1.12E-23  | postive |
| HSF1      | DNAJC9-AS1 | 0.414966422 | 7.56E-24  | postive |
| HELLS     | DNAJC9-AS1 | 0.404010866 | 1.40E-22  | postive |
| ZNF419    | DNAJC9-AS1 | 0.405876121 | 8.59E-23  | postive |
| PHKG2     | DNAJC9-AS1 | 0.563795276 | 1.51E-46  | postive |
| TAZ       | DNAJC9-AS1 | 0.616524597 | 9.62E-58  | postive |
| ZNF419    | AC016026.1 | 0.452206202 | 1.59E-28  | postive |
| VEGFA     | AC016026.1 | 0.493217083 | 2.18E-34  | postive |
| TUBE1     | AC016026.1 | 0.58572129  | 5.91E-51  | postive |
| SETD1B    | AC016026.1 | 0.470361157 | 5.05E-31  | postive |
| ALOX12    | AC016026.1 | 0.634029715 | 6.01E-62  | postive |
| ATM       | AC016026.1 | 0.565949103 | 5.75E-47  | postive |
| FBXW7     | AC016026.1 | 0.437519455 | 1.30E-26  | postive |
| SLC3A2    | AP000757.1 | 0.529366752 | 2.93E-40  | postive |
| FH        | AP000757.1 | 0.445775766 | 1.12E-27  | postive |
| ISCU      | AP000757.1 | 0.666146848 | 2.07E-70  | postive |
| DDIT3     | AP000757.1 | 0.613374352 | 5.15E-57  | postive |
| HERPUD1   | AP000757.1 | 0.40235932  | 2.16E-22  | postive |
| SLC2A12   | AP000757.1 | 0.410867128 | 2.28E-23  | postive |
| CS        | AP000757.1 | 0.412970088 | 1.30E-23  | postive |
| GOT1      | AP000757.1 | 0.457111171 | 3.48E-29  | postive |
| ATG4D     | AP000757.1 | 0.632656387 | 1.31E-61  | postive |
| MAP1LC3A  | AP000757.1 | 0.46629534  | 1.89E-30  | postive |
| GABARAPL2 | AP000757.1 | 0.430901192 | 8.87E-26  | postive |
| GABARAPL1 | AP000757.1 | 0.798425711 | 2.06E-120 | postive |
| WIPI2     | AP000757.1 | 0.457475542 | 3.10E-29  | postive |
| BAP1      | AP000757.1 | 0.449101904 | 4.11E-28  | postive |
| LPIN1     | AP000757.1 | 0.577908691 | 2.40E-49  | postive |
| HELLS     | AL121672.2 | 0.458141193 | 2.52E-29  | postive |
| KLHL24    | AL121672.2 | 0.50752263  | 1.25E-36  | postive |
| TUBE1     | AL121672.2 | 0.416054004 | 5.62E-24  | postive |



|           |            |              |           |          |
|-----------|------------|--------------|-----------|----------|
| IREB2     | AL121672.2 | 0.440266696  | 5.82E-27  | postive  |
| GABPB1    | AL121672.2 | 0.564907421  | 9.17E-47  | postive  |
| PIK3CA    | AL121672.2 | 0.456477463  | 4.24E-29  | postive  |
| ATG7      | AL121672.2 | 0.431736544  | 6.98E-26  | postive  |
| MAPK8     | AL121672.2 | 0.421966452  | 1.10E-24  | postive  |
| LINC00472 | AL121672.2 | 0.873399499  | 6.32E-170 | postive  |
| ATM       | AL121672.2 | 0.66929759   | 2.69E-71  | postive  |
| FBXW7     | AL121672.2 | 0.408512515  | 4.28E-23  | postive  |
| HELLS     | AL133297.1 | 0.516016236  | 5.22E-38  | postive  |
| ALOX12    | AL133297.1 | 0.526247846  | 1.01E-39  | postive  |
| ATM       | AL133297.1 | 0.506966642  | 1.54E-36  | postive  |
| FBXW7     | AL133297.1 | 0.407994807  | 4.91E-23  | postive  |
| HELLS     | AC087284.1 | 0.557579411  | 2.34E-45  | postive  |
| ALOX12    | AC087284.1 | 0.427654844  | 2.24E-25  | postive  |
| GABPB1    | AC087284.1 | 0.523128159  | 3.40E-39  | postive  |
| ATG7      | AC087284.1 | 0.400081662  | 3.89E-22  | postive  |
| LINC00472 | AC087284.1 | 0.663774871  | 9.50E-70  | postive  |
| ATM       | AC087284.1 | 0.592477583  | 2.21E-52  | postive  |
| FBXW7     | AC087284.1 | 0.458777355  | 2.06E-29  | postive  |
| RGS4      | AC105118.1 | 0.517832376  | 2.62E-38  | postive  |
| KLHL24    | TRHDE-AS1  | 0.478476437  | 3.45E-32  | postive  |
| TUBE1     | TRHDE-AS1  | 0.439271293  | 7.80E-27  | postive  |
| MAPK8     | TRHDE-AS1  | 0.420174459  | 1.81E-24  | postive  |
| LINC00472 | TRHDE-AS1  | 0.597975831  | 1.44E-53  | postive  |
| OTUB1     | AC002470.1 | 0.468975455  | 7.93E-31  | postive  |
| ATG4D     | AC002470.1 | 0.411233188  | 2.07E-23  | postive  |
| RGS4      | AP003390.1 | 0.546252438  | 2.98E-43  | postive  |
| VLDLR     | VLDLR-AS1  | 0.47479214   | 1.18E-31  | postive  |
| TFAP2C    | VLDLR-AS1  | 0.486339633  | 2.38E-33  | postive  |
| LPIN1     | VLDLR-AS1  | 0.519674115  | 1.29E-38  | postive  |
| HELLS     | AC010680.4 | 0.491555277  | 3.90E-34  | postive  |
| ZNF419    | AC010680.4 | 0.42452087   | 5.41E-25  | postive  |
| TUBE1     | AC010680.4 | 0.556098266  | 4.45E-45  | postive  |
| ALOX12    | AC010680.4 | 0.551083775  | 3.85E-44  | postive  |
| GABPB1    | AC010680.4 | 0.536712755  | 1.53E-41  | postive  |
| MAPK8     | AC010680.4 | 0.400245932  | 3.73E-22  | postive  |
| LINC00472 | AC010680.4 | 0.578433969  | 1.88E-49  | postive  |
| ATM       | AC010680.4 | 0.670122296  | 1.57E-71  | postive  |
| FBXW7     | AC010680.4 | 0.485967922  | 2.71E-33  | postive  |
| LPIN1     | PGM5-AS1   | 0.410111029  | 2.79E-23  | postive  |
| HELLS     | MIR762HG   | 0.406950006  | 6.47E-23  | postive  |
| ZNF419    | MIR762HG   | 0.434386402  | 3.25E-26  | postive  |
| NCOA4     | MIR762HG   | -0.414449893 | 8.69E-24  | negative |
| PHKG2     | MIR762HG   | 0.663652881  | 1.03E-69  | postive  |
| MAPK1     | MIR762HG   | -0.449608737 | 3.52E-28  | negative |
| ANO6      | MIR762HG   | -0.40273895  | 1.95E-22  | negative |
| TAZ       | MIR762HG   | 0.622341864  | 4.13E-59  | postive  |
| TAZ       | AC136475.7 | 0.454571167  | 7.67E-29  | postive  |
| BRD4      | AL356481.3 | 0.422733146  | 8.92E-25  | postive  |
| ZNF419    | AL356481.3 | 0.545425043  | 4.21E-43  | postive  |
| VEGFA     | AL356481.3 | 0.508910135  | 7.51E-37  | postive  |
| TUBE1     | AL356481.3 | 0.553780173  | 1.21E-44  | postive  |
| SETD1B    | AL356481.3 | 0.470820681  | 4.35E-31  | postive  |
| ALOX12    | AL356481.3 | 0.570005761  | 9.19E-48  | postive  |
| PHKG2     | AL356481.3 | 0.422036926  | 1.08E-24  | postive  |
| YY1AP1    | AL356481.3 | 0.425837809  | 3.74E-25  | postive  |
| TAZ       | AL356481.3 | 0.585317458  | 7.17E-51  | postive  |
| FANCD2    | AC100778.2 | 0.416741101  | 4.66E-24  | postive  |

|           |            |             |          |         |
|-----------|------------|-------------|----------|---------|
| HELLS     | AC100778.2 | 0.45461423  | 7.57E-29 | postive |
| ZNF419    | AC100778.2 | 0.522648777 | 4.10E-39 | postive |
| TUBE1     | AC100778.2 | 0.523801628 | 2.62E-39 | postive |
| ALOX12    | AC100778.2 | 0.663899019 | 8.78E-70 | postive |
| GABPB1    | AC100778.2 | 0.420747318 | 1.55E-24 | postive |
| ATM       | AC100778.2 | 0.487966416 | 1.36E-33 | postive |
| FBXW7     | AC100778.2 | 0.409697612 | 3.12E-23 | postive |
| FANCD2    | AC010326.3 | 0.417131608 | 4.19E-24 | postive |
| HELLS     | AC010326.3 | 0.455050309 | 6.61E-29 | postive |
| BRD4      | AC010326.3 | 0.45383587  | 9.63E-29 | postive |
| ZNF419    | AC010326.3 | 0.65845223  | 2.75E-68 | postive |
| TUBE1     | AC010326.3 | 0.502422994 | 8.11E-36 | postive |
| ALOX12    | AC010326.3 | 0.526278477 | 9.93E-40 | postive |
| PHKG2     | AC010326.3 | 0.566779116 | 3.96E-47 | postive |
| TAZ       | AC010326.3 | 0.567470214 | 2.90E-47 | postive |
| FBXW7     | AC010326.3 | 0.410018283 | 2.86E-23 | postive |
| HELLS     | AC008972.1 | 0.441208471 | 4.40E-27 | postive |
| GABPB1    | AC008972.1 | 0.414214211 | 9.27E-24 | postive |
| ATM       | AC008972.1 | 0.504176339 | 4.28E-36 | postive |
| HELLS     | AC004263.1 | 0.54036834  | 3.44E-42 | postive |
| ZNF419    | AC004263.1 | 0.447212555 | 7.29E-28 | postive |
| TUBE1     | AC004263.1 | 0.594728198 | 7.28E-53 | postive |
| ALOX12    | AC004263.1 | 0.614079527 | 3.55E-57 | postive |
| GABPB1    | AC004263.1 | 0.493889771 | 1.72E-34 | postive |
| LINC00472 | AC004263.1 | 0.462340484 | 6.69E-30 | postive |
| ATM       | AC004263.1 | 0.662922108 | 1.64E-69 | postive |
| FBXW7     | AC004263.1 | 0.468991458 | 7.89E-31 | postive |
| PHKG2     | AL359881.1 | 0.47095201  | 4.17E-31 | postive |
| GCH1      | HCP5       | 0.436049084 | 2.00E-26 | postive |
| IFNG      | HCP5       | 0.419236085 | 2.35E-24 | postive |
| TFAP2C    | AP003392.4 | 0.491788656 | 3.60E-34 | postive |
| HBA1      | AP003392.4 | 0.410953985 | 2.23E-23 | postive |
| NCF2      | CCR5AS     | 0.449697842 | 3.43E-28 | postive |
| HRAS      | PPP1R21-DT | 0.432809517 | 5.13E-26 | postive |
| TFAP2C    | AC093001.1 | 0.584977725 | 8.44E-51 | postive |
| HBA1      | AC093001.1 | 0.495784552 | 8.79E-35 | postive |
| ISCU      | B3GAT1-DT  | 0.472163446 | 2.80E-31 | postive |
| ATG4D     | B3GAT1-DT  | 0.467290288 | 1.37E-30 | postive |
| GABARAPL1 | B3GAT1-DT  | 0.539273283 | 5.39E-42 | postive |
| LPIN1     | B3GAT1-DT  | 0.447007926 | 7.76E-28 | postive |
| ZNF419    | AC012313.1 | 0.464722792 | 3.13E-30 | postive |
| SETD1B    | AC012313.1 | 0.424984624 | 4.75E-25 | postive |
| ALOX12    | AC012313.1 | 0.500370591 | 1.70E-35 | postive |
| BAP1      | AC012313.1 | 0.476228705 | 7.30E-32 | postive |
| EIF2S1    | AF111167.2 | 0.408818586 | 3.94E-23 | postive |
| HRAS      | AC125494.2 | 0.404735957 | 1.16E-22 | postive |
| PHKG2     | AC125494.2 | 0.43849484  | 9.80E-27 | postive |
| TAZ       | AC125494.2 | 0.562343094 | 2.87E-46 | postive |
| ZNF419    | AP006623.1 | 0.452737163 | 1.35E-28 | postive |
| TUBE1     | AP006623.1 | 0.416781481 | 4.61E-24 | postive |
| ALOX12    | AP006623.1 | 0.684784702 | 8.01E-76 | postive |
| TAZ       | AP006623.1 | 0.411743809 | 1.80E-23 | postive |
| TFAP2C    | AL121944.1 | 0.510883473 | 3.60E-37 | postive |
| HBA1      | AL121944.1 | 0.651884917 | 1.59E-66 | postive |
| EGLN2     | AL121944.1 | 0.417127408 | 4.19E-24 | postive |
| ATF4      | SNHG7      | 0.439861489 | 6.56E-27 | postive |
| RPL8      | SNHG7      | 0.512587706 | 1.91E-37 | postive |
| JDP2      | NFE4       | 0.612499233 | 8.19E-57 | postive |

|           |            |             |           |         |
|-----------|------------|-------------|-----------|---------|
| RGS4      | NFE4       | 0.473338248 | 1.90E-31  | postive |
| EIF2S1    | NFE4       | 0.484515636 | 4.46E-33  | postive |
| KLHL24    | AC104779.1 | 0.536064656 | 2.00E-41  | postive |
| IREB2     | AC104779.1 | 0.480061921 | 2.02E-32  | postive |
| GABPB1    | AC104779.1 | 0.45115155  | 2.20E-28  | postive |
| PIK3CA    | AC104779.1 | 0.510323153 | 4.44E-37  | postive |
| KRAS      | AC104779.1 | 0.490616446 | 5.42E-34  | postive |
| MAPK8     | AC104779.1 | 0.418020389 | 3.28E-24  | postive |
| LINC00472 | AC104779.1 | 0.901722014 | 1.02E-197 | postive |
| PRKAA1    | AC104779.1 | 0.422812324 | 8.72E-25  | postive |
| ATM       | AC104779.1 | 0.493926044 | 1.70E-34  | postive |
| ISCU      | AC019197.1 | 0.632884233 | 1.15E-61  | postive |
| DDIT3     | AC019197.1 | 0.44492882  | 1.45E-27  | postive |
| KLHL24    | AC019197.1 | 0.437620978 | 1.27E-26  | postive |
| SLC2A12   | AC019197.1 | 0.49455584  | 1.36E-34  | postive |
| GOT1      | AC019197.1 | 0.423239429 | 7.74E-25  | postive |
| ATG4D     | AC019197.1 | 0.446746386 | 8.40E-28  | postive |
| MAP1LC3A  | AC019197.1 | 0.449884792 | 3.24E-28  | postive |
| GABARAPL2 | AC019197.1 | 0.431573883 | 7.32E-26  | postive |
| GABARAPL1 | AC019197.1 | 0.648266516 | 1.43E-65  | postive |
| WIPI2     | AC019197.1 | 0.427531652 | 2.32E-25  | postive |
| LINC00472 | AC019197.1 | 0.403726537 | 1.51E-22  | postive |
| LPIN1     | AC019197.1 | 0.56651631  | 4.46E-47  | postive |
| ISCU      | AC079848.1 | 0.451685693 | 1.87E-28  | postive |
| CHMP5     | AC079848.1 | 0.516507448 | 4.33E-38  | postive |
| GOT1      | AC079848.1 | 0.427803013 | 2.14E-25  | postive |
| GABARAPL2 | AC079848.1 | 0.451185058 | 2.18E-28  | postive |
| ISCU      | LINC02343  | 0.475028934 | 1.09E-31  | postive |
| ACSL3     | LINC02343  | 0.459800753 | 1.50E-29  | postive |
| KLHL24    | LINC02343  | 0.622584811 | 3.61E-59  | postive |
| GABARAPL1 | LINC02343  | 0.593778477 | 1.17E-52  | postive |
| WIPI2     | LINC02343  | 0.407811799 | 5.15E-23  | postive |
| LINC00472 | LINC02343  | 0.597224318 | 2.10E-53  | postive |
| LPIN1     | LINC02343  | 0.641492919 | 7.99E-64  | postive |
| HRAS      | CAMTA1-DT  | 0.580238412 | 8.03E-50  | postive |
| PHKG2     | CAMTA1-DT  | 0.502247084 | 8.64E-36  | postive |
| EGLN2     | CAMTA1-DT  | 0.609178069 | 4.68E-56  | postive |
| TAZ       | CAMTA1-DT  | 0.449086401 | 4.13E-28  | postive |
| ISCU      | AC005281.1 | 0.492537263 | 2.77E-34  | postive |
| KLHL24    | AC005281.1 | 0.486636436 | 2.15E-33  | postive |
| ATG4D     | AC005281.1 | 0.410759375 | 2.35E-23  | postive |
| GABARAPL1 | AC005281.1 | 0.611664962 | 1.27E-56  | postive |
| WIPI2     | AC005281.1 | 0.422417779 | 9.74E-25  | postive |
| BAP1      | AC005281.1 | 0.476970786 | 5.70E-32  | postive |
| LPIN1     | AC005281.1 | 0.55933613  | 1.08E-45  | postive |
| HELLS     | AC007991.4 | 0.431151214 | 8.26E-26  | postive |
| TUBE1     | AC007991.4 | 0.43816642  | 1.08E-26  | postive |
| ALOX12    | AC007991.4 | 0.516107708 | 5.05E-38  | postive |
| GABPB1    | AC007991.4 | 0.420140525 | 1.83E-24  | postive |
| ATM       | AC007991.4 | 0.529876574 | 2.40E-40  | postive |
| FBXW7     | AC007991.4 | 0.469401361 | 6.91E-31  | postive |
| TUBE1     | AL121748.1 | 0.428791917 | 1.62E-25  | postive |
| ALOX12    | AL121748.1 | 0.461963607 | 7.54E-30  | postive |
| GABPB1    | AL121748.1 | 0.427803424 | 2.14E-25  | postive |
| ATM       | AL121748.1 | 0.519723288 | 1.27E-38  | postive |
| FBXW7     | AL121748.1 | 0.481511433 | 1.24E-32  | postive |
| HBA1      | AC006273.1 | 0.476446176 | 6.79E-32  | postive |
| MAPK8     | LHFPL3-AS2 | 0.403197877 | 1.73E-22  | postive |

|           |            |             |           |         |
|-----------|------------|-------------|-----------|---------|
| HELLS     | AC112496.1 | 0.474270504 | 1.40E-31  | postive |
| TUBE1     | AC112496.1 | 0.482626422 | 8.49E-33  | postive |
| ALOX12    | AC112496.1 | 0.565311531 | 7.65E-47  | postive |
| GABPB1    | AC112496.1 | 0.434253293 | 3.38E-26  | postive |
| LINC00472 | AC112496.1 | 0.597230364 | 2.09E-53  | postive |
| ATM       | AC112496.1 | 0.529888144 | 2.39E-40  | postive |
| FBXW7     | AC112496.1 | 0.436424618 | 1.80E-26  | postive |
| HSF1      | AC074212.1 | 0.442312658 | 3.17E-27  | postive |
| SRC       | AC074212.1 | 0.406500665 | 7.29E-23  | postive |
| CHAC1     | AC074212.1 | 0.410195657 | 2.73E-23  | postive |
| PHKG2     | AC074212.1 | 0.650136364 | 4.61E-66  | postive |
| ULK1      | AC074212.1 | 0.415954321 | 5.78E-24  | postive |
| TAZ       | AC074212.1 | 0.582789337 | 2.40E-50  | postive |
| SOCS1     | AC080013.2 | 0.406797371 | 6.74E-23  | postive |
| LINC00472 | AC080013.2 | 0.606926026 | 1.51E-55  | postive |
| HBA1      | GATA3-AS1  | 0.593168768 | 1.57E-52  | postive |
| HRAS      | GATA3-AS1  | 0.550063034 | 5.95E-44  | postive |
| EGLN2     | GATA3-AS1  | 0.809711403 | 2.08E-126 | postive |
| HELLS     | AL162724.2 | 0.42500324  | 4.73E-25  | postive |
| ZNF419    | AL162724.2 | 0.411123182 | 2.13E-23  | postive |
| TUBE1     | AL162724.2 | 0.565252764 | 7.86E-47  | postive |
| ALOX12    | AL162724.2 | 0.579528968 | 1.12E-49  | postive |
| GABPB1    | AL162724.2 | 0.490320964 | 6.01E-34  | postive |
| ATM       | AL162724.2 | 0.626491747 | 4.19E-60  | postive |
| FBXW7     | AL162724.2 | 0.417552737 | 3.73E-24  | postive |
| HELLS     | AC090181.2 | 0.52436668  | 2.10E-39  | postive |
| KLHL24    | AC090181.2 | 0.426911877 | 2.76E-25  | postive |
| TUBE1     | AC090181.2 | 0.428369017 | 1.83E-25  | postive |
| IREB2     | AC090181.2 | 0.430753603 | 9.25E-26  | postive |
| GABPB1    | AC090181.2 | 0.580298468 | 7.81E-50  | postive |
| PIK3CA    | AC090181.2 | 0.417180745 | 4.13E-24  | postive |
| MAPK8     | AC090181.2 | 0.440435144 | 5.53E-27  | postive |
| LINC00472 | AC090181.2 | 0.823305973 | 3.47E-134 | postive |
| ATM       | AC090181.2 | 0.695675376 | 3.53E-79  | postive |
| FBXW7     | AC090181.2 | 0.470664307 | 4.58E-31  | postive |
| HELLS     | AC010761.3 | 0.579279209 | 1.26E-49  | postive |
| TUBE1     | AC010761.3 | 0.517773269 | 2.68E-38  | postive |
| ALOX12    | AC010761.3 | 0.56792184  | 2.37E-47  | postive |
| GABPB1    | AC010761.3 | 0.558132685 | 1.83E-45  | postive |
| ATG7      | AC010761.3 | 0.405272348 | 1.01E-22  | postive |
| MAPK8     | AC010761.3 | 0.459625233 | 1.58E-29  | postive |
| LINC00472 | AC010761.3 | 0.564652074 | 1.03E-46  | postive |
| ATM       | AC010761.3 | 0.778097137 | 1.60E-110 | postive |
| FBXW7     | AC010761.3 | 0.512884236 | 1.70E-37  | postive |
| HELLS     | AL391001.1 | 0.417951748 | 3.35E-24  | postive |
| KLHL24    | AL391001.1 | 0.479029461 | 2.86E-32  | postive |
| TUBE1     | AL391001.1 | 0.41293348  | 1.31E-23  | postive |
| IREB2     | AL391001.1 | 0.455584673 | 5.60E-29  | postive |
| GABPB1    | AL391001.1 | 0.526966879 | 7.58E-40  | postive |
| PIK3CA    | AL391001.1 | 0.464072676 | 3.85E-30  | postive |
| KRAS      | AL391001.1 | 0.43669596  | 1.66E-26  | postive |
| MAPK8     | AL391001.1 | 0.442165873 | 3.31E-27  | postive |
| LINC00472 | AL391001.1 | 0.754895242 | 1.91E-100 | postive |
| PRKAA2    | AL391001.1 | 0.429399437 | 1.36E-25  | postive |
| PRKAA1    | AL391001.1 | 0.403544636 | 1.58E-22  | postive |
| ATM       | AL391001.1 | 0.58574394  | 5.84E-51  | postive |
| HSPB1     | IDH1-AS1   | 0.409587625 | 3.21E-23  | postive |
| HRAS      | IDH1-AS1   | 0.425811115 | 3.77E-25  | postive |

|           |            |             |           |         |
|-----------|------------|-------------|-----------|---------|
| SLC3A2    | AC120498.4 | 0.406300246 | 7.68E-23  | postive |
| FH        | AC120498.4 | 0.413163656 | 1.23E-23  | postive |
| ISCU      | AC120498.4 | 0.488886853 | 9.89E-34  | postive |
| CHAC1     | AC120498.4 | 0.420867462 | 1.50E-24  | postive |
| DDIT3     | AC120498.4 | 0.440185689 | 5.96E-27  | postive |
| SLC2A8    | AC120498.4 | 0.556253534 | 4.16E-45  | postive |
| ATG4D     | AC120498.4 | 0.557261384 | 2.68E-45  | postive |
| MAP1LC3A  | AC120498.4 | 0.459807375 | 1.49E-29  | postive |
| GABARAPL1 | AC120498.4 | 0.493534395 | 1.95E-34  | postive |
| WIPI2     | AC120498.4 | 0.465340432 | 2.57E-30  | postive |
| LPIN1     | AC120498.4 | 0.492631653 | 2.68E-34  | postive |
| TUBE1     | AC008554.1 | 0.432336596 | 5.87E-26  | postive |
| ALOX12    | AC008554.1 | 0.422052481 | 1.08E-24  | postive |
| ATM       | AC008554.1 | 0.460164071 | 1.33E-29  | postive |
| PHKG2     | AC092757.2 | 0.422595084 | 9.27E-25  | postive |
| SLC2A12   | AC104237.2 | 0.452035479 | 1.68E-28  | postive |
| ZNF419    | AL390066.1 | 0.414042207 | 9.71E-24  | postive |
| TUBE1     | AL390066.1 | 0.437001347 | 1.52E-26  | postive |
| ALOX12    | AL390066.1 | 0.577067686 | 3.55E-49  | postive |
| PHKG2     | AL390066.1 | 0.422063949 | 1.07E-24  | postive |
| TAZ       | AL390066.1 | 0.486440167 | 2.30E-33  | postive |
| GABPB1    | AC137932.2 | 0.430631894 | 9.58E-26  | postive |
| ATM       | AC137932.2 | 0.402972038 | 1.84E-22  | postive |
| FBXW7     | AC137932.2 | 0.40525683  | 1.01E-22  | postive |
| HELLS     | AL049869.2 | 0.51339903  | 1.40E-37  | postive |
| ZNF419    | AL049869.2 | 0.4162607   | 5.31E-24  | postive |
| KLHL24    | AL049869.2 | 0.423857632 | 6.52E-25  | postive |
| TUBE1     | AL049869.2 | 0.51425162  | 1.02E-37  | postive |
| ALOX12    | AL049869.2 | 0.520830409 | 8.28E-39  | postive |
| IREB2     | AL049869.2 | 0.462461036 | 6.44E-30  | postive |
| GABPB1    | AL049869.2 | 0.577795481 | 2.53E-49  | postive |
| PIK3CA    | AL049869.2 | 0.415007432 | 7.47E-24  | postive |
| MAPK8     | AL049869.2 | 0.486333287 | 2.39E-33  | postive |
| LINC00472 | AL049869.2 | 0.74769221  | 1.52E-97  | postive |
| ATM       | AL049869.2 | 0.753773038 | 5.49E-100 | postive |
| FBXW7     | AL049869.2 | 0.4949917   | 1.16E-34  | postive |
| FANCD2    | AP003774.2 | 0.446267154 | 9.70E-28  | postive |
| TFAP2C    | AP003774.2 | 0.484527945 | 4.44E-33  | postive |
| HBA1      | AP003774.2 | 0.45194293  | 1.72E-28  | postive |
| ARNTL     | AL139011.1 | 0.434413998 | 3.22E-26  | postive |
| ZNF419    | AL139011.1 | 0.493756782 | 1.80E-34  | postive |
| VEGFA     | AL139011.1 | 0.410634957 | 2.43E-23  | postive |
| TUBE1     | AL139011.1 | 0.568110516 | 2.17E-47  | postive |
| SETD1B    | AL139011.1 | 0.528556612 | 4.05E-40  | postive |
| ALOX12    | AL139011.1 | 0.662843498 | 1.72E-69  | postive |
| GABPB1    | AL139011.1 | 0.48371477  | 5.86E-33  | postive |
| MAPK8     | AL139011.1 | 0.459147226 | 1.84E-29  | postive |
| LINC00472 | AL139011.1 | 0.487398739 | 1.66E-33  | postive |
| ATM       | AL139011.1 | 0.675978533 | 3.24E-73  | postive |
| YY1AP1    | AL139011.1 | 0.431738607 | 6.98E-26  | postive |
| FBXW7     | AL139011.1 | 0.458790191 | 2.06E-29  | postive |
| NCF2      | AC002091.1 | 0.648548432 | 1.20E-65  | postive |
| CYBB      | AC002091.1 | 0.553853138 | 1.17E-44  | postive |
| ALOX15B   | AC002091.1 | 0.413218948 | 1.21E-23  | postive |
| TNFAIP3   | AC002091.1 | 0.411553534 | 1.90E-23  | postive |
| IL6       | AC004264.1 | 0.505577804 | 2.57E-36  | postive |
| SLC2A3    | AC004264.1 | 0.423657888 | 6.89E-25  | postive |
| ZNF419    | AC005674.1 | 0.545585082 | 3.94E-43  | postive |

|           |            |              |           |          |
|-----------|------------|--------------|-----------|----------|
| VEGFA     | AC005674.1 | 0.440652358  | 5.19E-27  | postive  |
| TUBE1     | AC005674.1 | 0.610480561  | 2.37E-56  | postive  |
| SETD1B    | AC005674.1 | 0.452965347  | 1.26E-28  | postive  |
| ALOX12    | AC005674.1 | 0.529630624  | 2.64E-40  | postive  |
| GABPB1    | AC005674.1 | 0.503804954  | 4.91E-36  | postive  |
| ATM       | AC005674.1 | 0.484861937  | 3.96E-33  | postive  |
| TAZ       | AC005674.1 | 0.514962466  | 7.79E-38  | postive  |
| FBXW7     | AC005674.1 | 0.480224055  | 1.92E-32  | postive  |
| PHKG2     | AL162741.1 | 0.444642619  | 1.58E-27  | postive  |
| TAZ       | AL162741.1 | 0.495666535  | 9.16E-35  | postive  |
| ASNS      | AC034213.1 | 0.46732157   | 1.36E-30  | postive  |
| TRIB3     | AC034213.1 | 0.495391348  | 1.01E-34  | postive  |
| CARS1     | AC034213.1 | 0.430512141  | 9.92E-26  | postive  |
| GPX4      | CH17-340M2 | 0.502541369  | 7.77E-36  | postive  |
| HSPB1     | CH17-340M2 | 0.555499576  | 5.77E-45  | postive  |
| RPL8      | CH17-340M2 | 0.413593765  | 1.10E-23  | postive  |
| HBA1      | CH17-340M2 | 0.691168536  | 9.01E-78  | postive  |
| HRAS      | CH17-340M2 | 0.700324058  | 1.17E-80  | postive  |
| MAP1LC3A  | CH17-340M2 | 0.507691488  | 1.18E-36  | postive  |
| EGLN2     | CH17-340M2 | 0.788410471  | 2.10E-115 | postive  |
| KLHL24    | AC090579.1 | 0.557837468  | 2.09E-45  | postive  |
| IREB2     | AC090579.1 | 0.427035299  | 2.67E-25  | postive  |
| GABPB1    | AC090579.1 | 0.50545651   | 2.68E-36  | postive  |
| PIK3CA    | AC090579.1 | 0.487193194  | 1.78E-33  | postive  |
| LINC00472 | AC090579.1 | 0.892009227  | 2.54E-187 | postive  |
| TGFBFR1   | AC090579.1 | 0.423916883  | 6.41E-25  | postive  |
| ATM       | AC090579.1 | 0.553371023  | 1.45E-44  | postive  |
| HELLS     | AC009054.2 | 0.412702964  | 1.39E-23  | postive  |
| VEGFA     | AC010655.2 | 0.417858933  | 3.43E-24  | postive  |
| HILPDA    | AC010655.2 | 0.527054958  | 7.32E-40  | postive  |
| TAZ       | AC010655.2 | 0.44521343   | 1.33E-27  | postive  |
| HELLS     | AP002340.1 | 0.481364016  | 1.30E-32  | postive  |
| ZNF419    | AP002340.1 | 0.426955611  | 2.73E-25  | postive  |
| TUBE1     | AP002340.1 | 0.531352642  | 1.33E-40  | postive  |
| ALOX12    | AP002340.1 | 0.534090427  | 4.44E-41  | postive  |
| GABPB1    | AP002340.1 | 0.547736108  | 1.59E-43  | postive  |
| MAPK8     | AP002340.1 | 0.433954385  | 3.68E-26  | postive  |
| LINC00472 | AP002340.1 | 0.572233377  | 3.32E-48  | postive  |
| ATM       | AP002340.1 | 0.721774919  | 7.21E-88  | postive  |
| FBXW7     | AP002340.1 | 0.510278261  | 4.52E-37  | postive  |
| FANCD2    | AC011481.1 | 0.421738865  | 1.18E-24  | postive  |
| ZNF419    | AC011481.1 | 0.452330107  | 1.53E-28  | postive  |
| ALOX12    | AC011481.1 | 0.562894987  | 2.25E-46  | postive  |
| TFAP2C    | AC011481.1 | 0.439214544  | 7.93E-27  | postive  |
| TAZ       | AC011481.1 | 0.410901037  | 2.26E-23  | postive  |
| TFAP2C    | AC010531.6 | 0.608602271  | 6.32E-56  | postive  |
| HBA1      | AC010531.6 | 0.577588547  | 2.79E-49  | postive  |
| ISCU      | AC008736.1 | 0.49795693   | 4.05E-35  | postive  |
| DDIT3     | AC008736.1 | 0.403225689  | 1.72E-22  | postive  |
| SLC2A8    | AC008736.1 | 0.527578653  | 5.95E-40  | postive  |
| TFAP2C    | AC008736.1 | 0.401555443  | 2.66E-22  | postive  |
| ATG4D     | AC008736.1 | 0.486040937  | 2.64E-33  | postive  |
| MAP1LC3A  | AC008736.1 | 0.497797929  | 4.29E-35  | postive  |
| WIPI2     | AC008736.1 | 0.455518217  | 5.71E-29  | postive  |
| MAPK1     | AC008736.1 | -0.418771301 | 2.67E-24  | negative |
| LPIN1     | AC008736.1 | 0.448629847  | 4.75E-28  | postive  |
| SIRT1     | AC008736.1 | -0.450123775 | 3.01E-28  | negative |
| HELLS     | AC005261.1 | 0.442383394  | 3.10E-27  | postive  |

|           |            |              |           |          |
|-----------|------------|--------------|-----------|----------|
| ZNF419    | AC005261.1 | 0.576898176  | 3.84E-49  | postive  |
| TUBE1     | AC005261.1 | 0.465165316  | 2.72E-30  | postive  |
| GABPB1    | AC005261.1 | 0.567606852  | 2.73E-47  | postive  |
| LINC00472 | AC005261.1 | 0.555319103  | 6.24E-45  | postive  |
| TAZ       | AC005261.1 | 0.416356209  | 5.18E-24  | postive  |
| FBXW7     | AC005261.1 | 0.4720635    | 2.89E-31  | postive  |
| ZNF419    | PPP1R26-AS | 0.407648825  | 5.38E-23  | postive  |
| TUBE1     | PPP1R26-AS | 0.421634205  | 1.21E-24  | postive  |
| ALOX12    | PPP1R26-AS | 0.561244159  | 4.67E-46  | postive  |
| ISCU      | GSEC       | 0.407022191  | 6.35E-23  | postive  |
| KLHL24    | GSEC       | 0.44678257   | 8.30E-28  | postive  |
| LINC00472 | GSEC       | 0.603579452  | 8.44E-55  | postive  |
| LPIN1     | GSEC       | 0.53061083   | 1.79E-40  | postive  |
| ZNF419    | AC253536.6 | 0.533351346  | 5.98E-41  | postive  |
| TUBE1     | AC253536.6 | 0.46451389   | 3.35E-30  | postive  |
| ALOX12    | AC253536.6 | 0.476136562  | 7.53E-32  | postive  |
| GABPB1    | AC253536.6 | 0.446769296  | 8.34E-28  | postive  |
| LINC00472 | AC253536.6 | 0.690580153  | 1.37E-77  | postive  |
| LPIN1     | AC253536.6 | 0.462758258  | 5.86E-30  | postive  |
| ATM       | AC253536.6 | 0.426685052  | 2.94E-25  | postive  |
| TAZ       | AC253536.6 | 0.41021603   | 2.72E-23  | postive  |
| TUBE1     | AC079906.1 | 0.426393737  | 3.20E-25  | postive  |
| PHKG2     | AC079906.1 | 0.451135832  | 2.21E-28  | postive  |
| TAZ       | AC079906.1 | 0.579355125  | 1.22E-49  | postive  |
| BRD4      | AC004771.4 | 0.425719543  | 3.86E-25  | postive  |
| ZNF419    | AC004771.4 | 0.448218719  | 5.38E-28  | postive  |
| VEGFA     | AC004771.4 | 0.441242118  | 4.36E-27  | postive  |
| TUBE1     | AC004771.4 | 0.506920434  | 1.57E-36  | postive  |
| SETD1B    | AC004771.4 | 0.541753989  | 1.94E-42  | postive  |
| ALOX12    | AC004771.4 | 0.670823532  | 9.90E-72  | postive  |
| GABPB1    | AC004771.4 | 0.405069638  | 1.06E-22  | postive  |
| LINC00472 | AC004771.4 | 0.432099975  | 6.29E-26  | postive  |
| ATM       | AC004771.4 | 0.566930405  | 3.70E-47  | postive  |
| FBXW7     | AC004771.4 | 0.402935562  | 1.86E-22  | postive  |
| HSF1      | MHENCN     | 0.418242159  | 3.09E-24  | postive  |
| DRD4      | MHENCN     | 0.410846902  | 2.30E-23  | postive  |
| NRAS      | MHENCN     | -0.411965791 | 1.70E-23  | negative |
| HRAS      | MHENCN     | 0.477476315  | 4.82E-32  | postive  |
| NCOA4     | MHENCN     | -0.504177456 | 4.28E-36  | negative |
| PHKG2     | MHENCN     | 0.756810218  | 3.11E-101 | postive  |
| BECN1     | MHENCN     | -0.431631904 | 7.19E-26  | negative |
| MAPK1     | MHENCN     | -0.430687618 | 9.43E-26  | negative |
| ANO6      | MHENCN     | -0.424137475 | 6.02E-25  | negative |
| TAZ       | MHENCN     | 0.834950694  | 2.12E-141 | postive  |
| TUBE1     | AC092903.2 | 0.42761047   | 2.27E-25  | postive  |
| ALOX12    | AC092903.2 | 0.421183325  | 1.37E-24  | postive  |
| LINC00472 | AC092903.2 | 0.51449053   | 9.31E-38  | postive  |
| ATM       | AC092903.2 | 0.470740416  | 4.46E-31  | postive  |
| LINC00472 | MAILR      | 0.589808871  | 8.17E-52  | postive  |
| FANCD2    | HMGA1P4    | 0.44876975   | 4.55E-28  | postive  |
| TFAP2C    | HMGA1P4    | 0.570317311  | 7.98E-48  | postive  |
| HBA1      | HMGA1P4    | 0.512665099  | 1.85E-37  | postive  |
| DUOX1     | HMGA1P4    | 0.411855129  | 1.75E-23  | postive  |
| GPX4      | TYMSOS     | 0.410682789  | 2.40E-23  | postive  |
| PEBP1     | TYMSOS     | 0.408203637  | 4.64E-23  | postive  |
| MUC1      | AC130371.2 | 0.488414633  | 1.16E-33  | postive  |
| WIP1      | AC130371.2 | 0.434081732  | 3.55E-26  | postive  |
| EGLN2     | AC130371.2 | 0.546147061  | 3.11E-43  | postive  |

|           |            |             |          |         |
|-----------|------------|-------------|----------|---------|
| ZNF419    | AC005013.1 | 0.454377869 | 8.14E-29 | postive |
| TUBE1     | AC005013.1 | 0.532505819 | 8.39E-41 | postive |
| ALOX12    | AC005013.1 | 0.531554174 | 1.23E-40 | postive |
| GABPB1    | AC005013.1 | 0.471519945 | 3.46E-31 | postive |
| LINC00472 | AC005013.1 | 0.400741482 | 3.28E-22 | postive |
| ATM       | AC005013.1 | 0.606469003 | 1.91E-55 | postive |
| FBXW7     | AC005013.1 | 0.435241039 | 2.54E-26 | postive |
| DUOX1     | AC004846.1 | 0.474765442 | 1.19E-31 | postive |
| TFAP2C    | ARF4-AS1   | 0.457414283 | 3.16E-29 | postive |
| HBA1      | ARF4-AS1   | 0.431193146 | 8.16E-26 | postive |
| FANCD2    | TRG-AS1    | 0.433583583 | 4.10E-26 | postive |
| PML       | TRG-AS1    | 0.436782591 | 1.62E-26 | postive |
| GCH1      | TRG-AS1    | 0.483750796 | 5.79E-33 | postive |
| IFNG      | TRG-AS1    | 0.661664385 | 3.64E-69 | postive |
| TNFAIP3   | TRG-AS1    | 0.431327353 | 7.85E-26 | postive |
| ENPP2     | AC007998.3 | 0.476745337 | 6.15E-32 | postive |
| SLC1A4    | AC007998.3 | 0.435573479 | 2.30E-26 | postive |
| HELLS     | LINC00271  | 0.401639463 | 2.60E-22 | postive |
| TUBE1     | LINC00271  | 0.574979293 | 9.37E-49 | postive |
| MAP3K5    | LINC00271  | 0.402420701 | 2.12E-22 | postive |
| IREB2     | LINC00271  | 0.488965689 | 9.62E-34 | postive |
| GABPB1    | LINC00271  | 0.459854545 | 1.47E-29 | postive |
| MAPK8     | LINC00271  | 0.512086017 | 2.30E-37 | postive |
| LINC00472 | LINC00271  | 0.459438597 | 1.68E-29 | postive |
| PRKAA2    | LINC00271  | 0.543561817 | 9.17E-43 | postive |
| PRKAA1    | LINC00271  | 0.426052686 | 3.52E-25 | postive |
| ATM       | LINC00271  | 0.653542166 | 5.77E-67 | postive |
| BRD4      | LINC00926  | 0.452682073 | 1.37E-28 | postive |
| ALOX12    | LINC00926  | 0.448305249 | 5.24E-28 | postive |
| PHKG2     | LINC00926  | 0.474774203 | 1.18E-31 | postive |
| TAZ       | LINC00926  | 0.58111303  | 5.31E-50 | postive |
| FBXW7     | LINC00926  | 0.420577012 | 1.62E-24 | postive |
| TRIB3     | AC100872.2 | 0.464552295 | 3.30E-30 | postive |
| IL6       | AC100872.2 | 0.402073765 | 2.32E-22 | postive |
| STEAP3    | AC100872.2 | 0.404692955 | 1.17E-22 | postive |
| HELLS     | AC025423.1 | 0.539959254 | 4.07E-42 | postive |
| TUBE1     | AC025423.1 | 0.440447783 | 5.51E-27 | postive |
| ALOX12    | AC025423.1 | 0.433199714 | 4.58E-26 | postive |
| GABPB1    | AC025423.1 | 0.525438801 | 1.38E-39 | postive |
| ATG7      | AC025423.1 | 0.472234736 | 2.74E-31 | postive |
| LINC00472 | AC025423.1 | 0.598001231 | 1.42E-53 | postive |
| ATM       | AC025423.1 | 0.748171126 | 9.83E-98 | postive |
| FBXW7     | AC025423.1 | 0.499604272 | 2.24E-35 | postive |
| NCF2      | AC008972.2 | 0.442718612 | 2.81E-27 | postive |
| CYBB      | AC008972.2 | 0.405508379 | 9.47E-23 | postive |
| ATG7      | AC008972.2 | 0.433587887 | 4.10E-26 | postive |
| ALOX15B   | AC008972.2 | 0.426093167 | 3.48E-25 | postive |
| HELLS     | AC021205.3 | 0.467408972 | 1.32E-30 | postive |
| ZNF419    | AC021205.3 | 0.509518965 | 5.99E-37 | postive |
| VEGFA     | AC021205.3 | 0.416626991 | 4.81E-24 | postive |
| TUBE1     | AC021205.3 | 0.718272091 | 1.21E-86 | postive |
| ALOX12    | AC021205.3 | 0.587304724 | 2.76E-51 | postive |
| GABPB1    | AC021205.3 | 0.558334101 | 1.68E-45 | postive |
| MAPK8     | AC021205.3 | 0.420508274 | 1.65E-24 | postive |
| LINC00472 | AC021205.3 | 0.430959422 | 8.72E-26 | postive |
| ATM       | AC021205.3 | 0.686965415 | 1.75E-76 | postive |
| FBXW7     | AC021205.3 | 0.517554067 | 2.91E-38 | postive |
| ISCU      | LINC00265  | 0.464312126 | 3.57E-30 | postive |



|           |            |              |          |          |
|-----------|------------|--------------|----------|----------|
| CS        | LINC00265  | 0.406044139  | 8.22E-23 | postive  |
| ATG4D     | LINC00265  | 0.505741889  | 2.42E-36 | postive  |
| GABARAPL1 | LINC00265  | 0.566931208  | 3.70E-47 | postive  |
| LPIN1     | LINC00265  | 0.63961954   | 2.39E-63 | postive  |
| SLC3A2    | AP003068.2 | 0.462148474  | 7.11E-30 | postive  |
| FH        | AP003068.2 | 0.428746541  | 1.64E-25 | postive  |
| ISCU      | AP003068.2 | 0.487631779  | 1.53E-33 | postive  |
| ATP5MC3   | AP003068.2 | 0.410525092  | 2.50E-23 | postive  |
| GOT1      | AP003068.2 | 0.488524323  | 1.12E-33 | postive  |
| ATG4D     | AP003068.2 | 0.485561664  | 3.12E-33 | postive  |
| GABARAPL2 | AP003068.2 | 0.462153629  | 7.10E-30 | postive  |
| GABARAPL1 | AP003068.2 | 0.430121464  | 1.11E-25 | postive  |
| MAPK14    | LINC00654  | 0.433691132  | 3.97E-26 | postive  |
| BACH1     | LINC00654  | 0.404405613  | 1.26E-22 | postive  |
| HELLS     | JMJD1C-AS1 | 0.549622658  | 7.17E-44 | postive  |
| ALOX12    | JMJD1C-AS1 | 0.404147094  | 1.35E-22 | postive  |
| GABPB1    | JMJD1C-AS1 | 0.473749436  | 1.66E-31 | postive  |
| ATM       | JMJD1C-AS1 | 0.460274303  | 1.29E-29 | postive  |
| VEGFA     | AC009495.1 | 0.435886652  | 2.10E-26 | postive  |
| TUBE1     | AC009495.1 | 0.501031638  | 1.34E-35 | postive  |
| ALOX12    | AC009495.1 | 0.408371266  | 4.44E-23 | postive  |
| DDIT3     | LINC00482  | 0.406363756  | 7.56E-23 | postive  |
| ATG4D     | LINC00482  | 0.401937804  | 2.41E-22 | postive  |
| ZNF419    | AC068620.2 | 0.539242734  | 5.46E-42 | postive  |
| TUBE1     | AC068620.2 | 0.472829648  | 2.25E-31 | postive  |
| ALOX12    | AC068620.2 | 0.401068689  | 3.02E-22 | postive  |
| GABPB1    | AC068620.2 | 0.419045978  | 2.48E-24 | postive  |
| PHKG2     | AC068620.2 | 0.565692386  | 6.45E-47 | postive  |
| TAZ       | AC068620.2 | 0.643229805  | 2.87E-64 | postive  |
| HELLS     | AC010530.1 | 0.42593194   | 3.64E-25 | postive  |
| ZNF419    | AC010530.1 | 0.452795584  | 1.33E-28 | postive  |
| TUBE1     | AC010530.1 | 0.411475572  | 1.94E-23 | postive  |
| ALOX12    | AC010530.1 | 0.52385346   | 2.56E-39 | postive  |
| GABPB1    | AC010530.1 | 0.459257042  | 1.77E-29 | postive  |
| LINC00472 | AC010530.1 | 0.660707202  | 6.66E-69 | postive  |
| LPIN1     | AC010530.1 | 0.411733102  | 1.81E-23 | postive  |
| ATM       | AC010530.1 | 0.464478635  | 3.38E-30 | postive  |
| FBXW7     | AC010530.1 | 0.417580395  | 3.70E-24 | postive  |
| VEGFA     | ZNF30-AS1  | 0.460496676  | 1.20E-29 | postive  |
| TUBE1     | ZNF30-AS1  | 0.469240316  | 7.28E-31 | postive  |
| ALOX12    | ZNF30-AS1  | 0.568714514  | 1.65E-47 | postive  |
| ATM       | ZNF30-AS1  | 0.448559402  | 4.85E-28 | postive  |
| NOX1      | AC083799.1 | 0.499340644  | 2.47E-35 | postive  |
| NOX1      | AC055822.1 | 0.460473957  | 1.21E-29 | postive  |
| BECN1     | AC055822.1 | -0.468999088 | 7.87E-31 | negative |
| TAZ       | DLGAP1-AS1 | 0.403899982  | 1.44E-22 | postive  |
| ZNF419    | AC012313.2 | 0.49675454   | 6.22E-35 | postive  |
| SETD1B    | AC012313.2 | 0.510244096  | 4.58E-37 | postive  |
| VEGFA     | AL645608.7 | 0.449817302  | 3.31E-28 | postive  |
| TAZ       | AL645608.7 | 0.401223965  | 2.90E-22 | postive  |
| BID       | PRKAR1B-AS | 0.40325678   | 1.71E-22 | postive  |
| ZNF419    | CAHM       | 0.428329901  | 1.85E-25 | postive  |
| TUBE1     | CAHM       | 0.432635886  | 5.39E-26 | postive  |
| PHKG2     | CAHM       | 0.541358341  | 2.29E-42 | postive  |
| TAZ       | CAHM       | 0.675267515  | 5.22E-73 | postive  |
| FH        | B4GALT1-AS | 0.470474177  | 4.87E-31 | postive  |
| SLC2A8    | B4GALT1-AS | 0.488908097  | 9.82E-34 | postive  |
| MAP1LC3A  | B4GALT1-AS | 0.437964823  | 1.15E-26 | postive  |

|           |            |              |          |          |
|-----------|------------|--------------|----------|----------|
| GABARAPL2 | B4GALT1-AS | 0.55742109   | 2.50E-45 | postive  |
| HMGB1     | AP001318.2 | 0.423333325  | 7.54E-25 | postive  |
| HSPB1     | PPP1R14B-A | 0.585938882  | 5.32E-51 | postive  |
| SLC2A6    | PPP1R14B-A | 0.460070924  | 1.37E-29 | postive  |
| HRAS      | PPP1R14B-A | 0.423402921  | 7.40E-25 | postive  |
| SIRT1     | PPP1R14B-A | -0.428259393 | 1.88E-25 | negative |
| TFAP2C    | AP000350.5 | 0.576979715  | 3.70E-49 | postive  |
| HBA1      | AP000350.5 | 0.477235729  | 5.22E-32 | postive  |
| TFAP2C    | AC096540.1 | 0.587448836  | 2.57E-51 | postive  |
| HBA1      | AC096540.1 | 0.526630612  | 8.65E-40 | postive  |
| BRD4      | AC005387.2 | 0.460936527  | 1.04E-29 | postive  |
| ZNF419    | AC005387.2 | 0.530455323  | 1.90E-40 | postive  |
| VEGFA     | AC005387.2 | 0.480798131  | 1.58E-32 | postive  |
| TUBE1     | AC005387.2 | 0.546717281  | 2.45E-43 | postive  |
| SETD1B    | AC005387.2 | 0.400380857  | 3.60E-22 | postive  |
| DRD4      | AC005387.2 | 0.409621912  | 3.18E-23 | postive  |
| ALOX12    | AC005387.2 | 0.668246863  | 5.33E-71 | postive  |
| PHKG2     | AC005387.2 | 0.467561499  | 1.25E-30 | postive  |
| TAZ       | AC005387.2 | 0.624889361  | 1.02E-59 | postive  |
| SNX4      | AC063919.1 | 0.443183597  | 2.45E-27 | postive  |
| FANCD2    | AC000120.1 | 0.401362943  | 2.80E-22 | postive  |
| HELLS     | AC000120.1 | 0.455811534  | 5.22E-29 | postive  |
| ALOX12    | AC000120.1 | 0.437950684  | 1.15E-26 | postive  |
| TFAP2C    | AC000120.1 | 0.502654594  | 7.46E-36 | postive  |
| HBA1      | AC000120.1 | 0.45819632   | 2.48E-29 | postive  |
| DUOX1     | AC000120.1 | 0.456620899  | 4.05E-29 | postive  |
| ZNF419    | AC132192.2 | 0.529249891  | 3.07E-40 | postive  |
| TUBE1     | AC132192.2 | 0.504044315  | 4.50E-36 | postive  |
| ALOX12    | AC132192.2 | 0.558867847  | 1.33E-45 | postive  |
| PHKG2     | AC132192.2 | 0.577160427  | 3.40E-49 | postive  |
| TAZ       | AC132192.2 | 0.661623241  | 3.73E-69 | postive  |
| HELLS     | AGBL5-IT1  | 0.415258887  | 6.98E-24 | postive  |
| ZNF419    | AGBL5-IT1  | 0.487857094  | 1.41E-33 | postive  |
| TUBE1     | AGBL5-IT1  | 0.423715437  | 6.78E-25 | postive  |
| ALOX12    | AGBL5-IT1  | 0.525249682  | 1.49E-39 | postive  |
| HBA1      | AGBL5-IT1  | 0.403089664  | 1.78E-22 | postive  |
| TAZ       | AGBL5-IT1  | 0.415559413  | 6.43E-24 | postive  |
| TAZ       | LINC02640  | 0.413235836  | 1.21E-23 | postive  |
| FANCD2    | AC011461.1 | 0.466130173  | 1.99E-30 | postive  |
| HELLS     | AC011461.1 | 0.546013744  | 3.29E-43 | postive  |
| ZNF419    | AC011461.1 | 0.508958144  | 7.38E-37 | postive  |
| TUBE1     | AC011461.1 | 0.499429351  | 2.39E-35 | postive  |
| ALOX12    | AC011461.1 | 0.58083568   | 6.06E-50 | postive  |
| GABPB1    | AC011461.1 | 0.486062005  | 2.62E-33 | postive  |
| LINC00472 | AC011461.1 | 0.525162734  | 1.54E-39 | postive  |
| ATM       | AC011461.1 | 0.532589745  | 8.11E-41 | postive  |
| FBXW7     | AC011461.1 | 0.504455525  | 3.87E-36 | postive  |
| RPL8      | SLC12A9-AS | 0.4889337    | 9.73E-34 | postive  |
| HBA1      | SLC12A9-AS | 0.407056485  | 6.29E-23 | postive  |
| HELLS     | AC009318.1 | 0.570714681  | 6.65E-48 | postive  |
| ZNF419    | AC009318.1 | 0.461156479  | 9.74E-30 | postive  |
| TUBE1     | AC009318.1 | 0.54951886   | 7.50E-44 | postive  |
| ALOX12    | AC009318.1 | 0.612730643  | 7.24E-57 | postive  |
| GABPB1    | AC009318.1 | 0.532176313  | 9.58E-41 | postive  |
| LINC00472 | AC009318.1 | 0.402971676  | 1.84E-22 | postive  |
| ATM       | AC009318.1 | 0.608257924  | 7.56E-56 | postive  |
| FBXW7     | AC009318.1 | 0.513131313  | 1.55E-37 | postive  |
| ISCU      | AC017100.1 | 0.457699857  | 2.89E-29 | postive  |

|           |            |              |           |          |
|-----------|------------|--------------|-----------|----------|
| HERPUD1   | AC017100.1 | 0.421895815  | 1.13E-24  | postive  |
| GOT1      | AC017100.1 | 0.408850276  | 3.91E-23  | postive  |
| GABARAPL1 | AC017100.1 | 0.457468184  | 3.11E-29  | postive  |
| BRD4      | STARD7-AS1 | 0.44471402   | 1.55E-27  | postive  |
| ZNF419    | STARD7-AS1 | 0.453144342  | 1.19E-28  | postive  |
| SETD1B    | STARD7-AS1 | 0.437438581  | 1.34E-26  | postive  |
| ALOX12    | STARD7-AS1 | 0.423379212  | 7.45E-25  | postive  |
| LPIN1     | STARD7-AS1 | 0.40115639   | 2.95E-22  | postive  |
| EGLN2     | STARD7-AS1 | 0.449379704  | 3.78E-28  | postive  |
| HELLS     | AC005154.4 | 0.551731014  | 2.92E-44  | postive  |
| ZNF419    | AC005154.4 | 0.433706964  | 3.96E-26  | postive  |
| TUBE1     | AC005154.4 | 0.560162798  | 7.53E-46  | postive  |
| ALOX12    | AC005154.4 | 0.591561755  | 3.47E-52  | postive  |
| GABPB1    | AC005154.4 | 0.551766842  | 2.88E-44  | postive  |
| ATG7      | AC005154.4 | 0.401493538  | 2.70E-22  | postive  |
| MAPK8     | AC005154.4 | 0.405549808  | 9.36E-23  | postive  |
| LINC00472 | AC005154.4 | 0.511215747  | 3.18E-37  | postive  |
| ATM       | AC005154.4 | 0.769403452  | 1.31E-106 | postive  |
| FBXW7     | AC005154.4 | 0.505495943  | 2.64E-36  | postive  |
| BRD4      | AC132872.1 | 0.502420523  | 8.12E-36  | postive  |
| ZNF419    | AC132872.1 | 0.478652626  | 3.25E-32  | postive  |
| VEGFA     | AC132872.1 | 0.418687939  | 2.73E-24  | postive  |
| DRD4      | AC132872.1 | 0.418327901  | 3.02E-24  | postive  |
| ALOX12    | AC132872.1 | 0.440439197  | 5.53E-27  | postive  |
| SCP2      | AC132872.1 | -0.406928764 | 6.51E-23  | negative |
| NCOA4     | AC132872.1 | -0.457839331 | 2.77E-29  | negative |
| PHKG2     | AC132872.1 | 0.518001984  | 2.45E-38  | postive  |
| EGLN2     | AC132872.1 | 0.419229273  | 2.35E-24  | postive  |
| TAZ       | AC132872.1 | 0.701579281  | 4.63E-81  | postive  |
| IL33      | LINC02202  | 0.483834847  | 5.63E-33  | postive  |
| HIC1      | LINC02202  | 0.55820633   | 1.78E-45  | postive  |
| ZEB1      | LINC02202  | 0.64143248   | 8.28E-64  | postive  |
| EPAS1     | LINC02202  | 0.591336871  | 3.87E-52  | postive  |
| ALOX12    | AC026992.1 | 0.400815211  | 3.22E-22  | postive  |
| GABARAPL1 | AC026992.1 | 0.417881593  | 3.41E-24  | postive  |
| HSPB1     | AC011445.1 | 0.487831248  | 1.43E-33  | postive  |
| HBA1      | AC011445.1 | 0.576595757  | 4.43E-49  | postive  |
| HRAS      | AC011445.1 | 0.763378636  | 5.38E-104 | postive  |
| MAP1LC3A  | AC011445.1 | 0.439843849  | 6.59E-27  | postive  |
| EGLN2     | AC011445.1 | 0.845883035  | 1.05E-148 | postive  |
| ZNF419    | AL590096.1 | 0.411036821  | 2.18E-23  | postive  |
| TUBE1     | AL590096.1 | 0.472671104  | 2.37E-31  | postive  |
| ALOX12    | AL590096.1 | 0.601945784  | 1.94E-54  | postive  |
| PHKG2     | AL590096.1 | 0.420353836  | 1.73E-24  | postive  |
| TAZ       | AL590096.1 | 0.572736861  | 2.64E-48  | postive  |
| NOX1      | AL008635.1 | 0.443037171  | 2.56E-27  | postive  |
| PHKG2     | AL008635.1 | 0.417211465  | 4.10E-24  | postive  |
| BECN1     | AL008635.1 | -0.445329614 | 1.29E-27  | negative |
| HELLS     | AL592430.1 | 0.424558241  | 5.35E-25  | postive  |
| ZNF419    | AL592430.1 | 0.405338378  | 9.90E-23  | postive  |
| KLHL24    | AL592430.1 | 0.413026083  | 1.28E-23  | postive  |
| TUBE1     | AL592430.1 | 0.553020429  | 1.68E-44  | postive  |
| ALOX12    | AL592430.1 | 0.536714     | 1.53E-41  | postive  |
| IREB2     | AL592430.1 | 0.415802316  | 6.02E-24  | postive  |
| GABPB1    | AL592430.1 | 0.499230133  | 2.57E-35  | postive  |
| MAPK8     | AL592430.1 | 0.494966172  | 1.17E-34  | postive  |
| LINC00472 | AL592430.1 | 0.711595677  | 2.30E-84  | postive  |
| ATM       | AL592430.1 | 0.60538981   | 3.33E-55  | postive  |

|           |            |              |          |          |
|-----------|------------|--------------|----------|----------|
| FBXW7     | AL592430.1 | 0.406187706  | 7.92E-23 | postive  |
| ALOX12    | SNHG28     | 0.421334448  | 1.32E-24 | postive  |
| TFAP2C    | AP003170.3 | 0.493862877  | 1.73E-34 | postive  |
| HBA1      | AP003170.3 | 0.433112516  | 4.70E-26 | postive  |
| DUOX1     | AP003170.3 | 0.411838871  | 1.76E-23 | postive  |
| LINC00472 | AP003170.3 | 0.470877075  | 4.27E-31 | postive  |
| FANCD2    | TSPOAP1-AS | 0.500114817  | 1.87E-35 | postive  |
| PML       | TSPOAP1-AS | 0.424941567  | 4.81E-25 | postive  |
| GCH1      | TSPOAP1-AS | 0.410717852  | 2.38E-23 | postive  |
| ALOX12    | TSPOAP1-AS | 0.544148901  | 7.18E-43 | postive  |
| IFNG      | TSPOAP1-AS | 0.537657019  | 1.04E-41 | postive  |
| TNFAIP3   | TSPOAP1-AS | 0.422823293  | 8.70E-25 | postive  |
| YY1AP1    | TSPOAP1-AS | 0.405996291  | 8.32E-23 | postive  |
| TUBE1     | AC093627.5 | 0.44207645   | 3.40E-27 | postive  |
| ALOX12    | AC093627.5 | 0.460028856  | 1.39E-29 | postive  |
| HIC1      | LINC02875  | 0.42916741   | 1.46E-25 | postive  |
| TAZ       | LINC02875  | 0.409331723  | 3.44E-23 | postive  |
| HIC1      | AC000067.1 | 0.465243089  | 2.65E-30 | postive  |
| MTOR      | LINC00571  | 0.416707616  | 4.70E-24 | postive  |
| ACSL3     | LINC00571  | 0.51187808   | 2.49E-37 | postive  |
| KLHL24    | LINC00571  | 0.746562201  | 4.26E-97 | postive  |
| MAP3K5    | LINC00571  | 0.442756034  | 2.78E-27 | postive  |
| EIF2AK4   | LINC00571  | 0.414495165  | 8.59E-24 | postive  |
| IREB2     | LINC00571  | 0.531722334  | 1.15E-40 | postive  |
| EMC2      | LINC00571  | 0.408069183  | 4.81E-23 | postive  |
| PIK3CA    | LINC00571  | 0.593506146  | 1.33E-52 | postive  |
| KRAS      | LINC00571  | 0.458750199  | 2.08E-29 | postive  |
| SLC38A1   | LINC00571  | 0.440156757  | 6.01E-27 | postive  |
| GABARAPL1 | LINC00571  | 0.411646415  | 1.85E-23 | postive  |
| LINC00472 | LINC00571  | 0.750605896  | 1.05E-98 | postive  |
| PRKAA1    | LINC00571  | 0.535557298  | 2.45E-41 | postive  |
| TGFBR1    | LINC00571  | 0.428011686  | 2.02E-25 | postive  |
| LPIN1     | LINC00571  | 0.539816989  | 4.31E-42 | postive  |
| ATM       | LINC00571  | 0.458491741  | 2.26E-29 | postive  |
| ZNF419    | AC068473.5 | 0.427640081  | 2.25E-25 | postive  |
| FANCD2    | VPS9D1-AS1 | 0.51932901   | 1.48E-38 | postive  |
| HELLS     | VPS9D1-AS1 | 0.428256127  | 1.89E-25 | postive  |
| BRD4      | VPS9D1-AS1 | 0.481348693  | 1.31E-32 | postive  |
| ASNS      | VPS9D1-AS1 | 0.41841615   | 2.95E-24 | postive  |
| ZNF419    | VPS9D1-AS1 | 0.414607228  | 8.33E-24 | postive  |
| SETD1B    | VPS9D1-AS1 | 0.448182112  | 5.44E-28 | postive  |
| ALOX12    | VPS9D1-AS1 | 0.414755174  | 8.00E-24 | postive  |
| PHKG2     | VPS9D1-AS1 | 0.546787349  | 2.38E-43 | postive  |
| TAZ       | VPS9D1-AS1 | 0.569090828  | 1.39E-47 | postive  |
| TFAP2C    | AC002398.1 | 0.441322287  | 4.26E-27 | postive  |
| NCOA4     | AC002398.1 | -0.441836274 | 3.65E-27 | negative |
| PHKG2     | AC002398.1 | 0.466503078  | 1.77E-30 | postive  |
| TAZ       | AC002398.1 | 0.487441594  | 1.63E-33 | postive  |
| MTOR      | AC018521.6 | 0.419607683  | 2.12E-24 | postive  |
| ZNF419    | AC018521.6 | 0.415944686  | 5.79E-24 | postive  |
| SETD1B    | AC018521.6 | 0.52255852   | 4.24E-39 | postive  |
| ALOX12    | AC018521.6 | 0.402263009  | 2.21E-22 | postive  |
| ZEB1      | AC018521.6 | 0.484424323  | 4.60E-33 | postive  |
| EPAS1     | AC018521.6 | 0.418827914  | 2.63E-24 | postive  |
| YY1AP1    | AC018521.6 | 0.464542979  | 3.31E-30 | postive  |
| ALOX12    | AL022341.1 | 0.430458286  | 1.01E-25 | postive  |
| HBA1      | AL022341.1 | 0.408964126  | 3.79E-23 | postive  |
| HRAS      | AL022341.1 | 0.464085841  | 3.84E-30 | postive  |

|           |            |              |           |          |
|-----------|------------|--------------|-----------|----------|
| PHKG2     | AL022341.1 | 0.423853938  | 6.52E-25  | postive  |
| EGLN2     | AL022341.1 | 0.487157037  | 1.80E-33  | postive  |
| TAZ       | AL022341.1 | 0.489340863  | 8.45E-34  | postive  |
| BRD4      | AC027601.1 | 0.424100919  | 6.09E-25  | postive  |
| ZNF419    | AC027601.1 | 0.495088706  | 1.12E-34  | postive  |
| VEGFA     | AC027601.1 | 0.442055366  | 3.42E-27  | postive  |
| TUBE1     | AC027601.1 | 0.483136827  | 7.14E-33  | postive  |
| SETD1B    | AC027601.1 | 0.507322733  | 1.35E-36  | postive  |
| DRD4      | AC027601.1 | 0.447520756  | 6.64E-28  | postive  |
| ALOX12    | AC027601.1 | 0.609671691  | 3.62E-56  | postive  |
| PHKG2     | AC027601.1 | 0.613982447  | 3.73E-57  | postive  |
| TAZ       | AC027601.1 | 0.758372544  | 6.97E-102 | postive  |
| KLHL24    | AC073651.1 | 0.568868937  | 1.54E-47  | postive  |
| GABPB1    | AC073651.1 | 0.407988875  | 4.92E-23  | postive  |
| PIK3CA    | AC073651.1 | 0.46345899   | 4.69E-30  | postive  |
| KRAS      | AC073651.1 | 0.411186073  | 2.10E-23  | postive  |
| LINC00472 | AC073651.1 | 0.946109458  | 4.10E-265 | postive  |
| KLHL24    | PLAC4      | 0.570416814  | 7.62E-48  | postive  |
| PIK3CA    | PLAC4      | 0.438391397  | 1.01E-26  | postive  |
| LINC00472 | PLAC4      | 0.892461368  | 8.77E-188 | postive  |
| TUBE1     | LINC01320  | 0.426278976  | 3.30E-25  | postive  |
| ALOX12    | LINC01320  | 0.504607499  | 3.66E-36  | postive  |
| PRKAA2    | LINC01320  | 0.407439962  | 5.69E-23  | postive  |
| ATM       | LINC01320  | 0.633137046  | 1.00E-61  | postive  |
| HELLS     | AC138207.5 | 0.409003412  | 3.75E-23  | postive  |
| ALOX12    | AC138207.5 | 0.437971022  | 1.14E-26  | postive  |
| ATM       | AC138207.5 | 0.441145622  | 4.48E-27  | postive  |
| FBXW7     | AC138207.5 | 0.483220647  | 6.94E-33  | postive  |
| GPX4      | AC008443.4 | 0.453509167  | 1.06E-28  | postive  |
| STAT3     | AC008443.4 | -0.4081289   | 4.74E-23  | negative |
| RPL8      | AC008443.4 | 0.45882624   | 2.03E-29  | postive  |
| MAPK14    | AC008443.4 | -0.406530654 | 7.23E-23  | negative |
| HRAS      | AC008443.4 | 0.565533019  | 6.93E-47  | postive  |
| BECN1     | AC008443.4 | -0.416487067 | 4.99E-24  | negative |
| SLC3A2    | LINC02185  | 0.483329301  | 6.69E-33  | postive  |
| ISCU      | LINC02185  | 0.556088028  | 4.47E-45  | postive  |
| DDIT3     | LINC02185  | 0.570786059  | 6.44E-48  | postive  |
| HERPUD1   | LINC02185  | 0.407013907  | 6.36E-23  | postive  |
| TFAP2C    | LINC02185  | 0.42624898   | 3.33E-25  | postive  |
| ATG4D     | LINC02185  | 0.447897608  | 5.93E-28  | postive  |
| GABARAPL1 | LINC02185  | 0.767453975  | 9.37E-106 | postive  |
| LPIN1     | LINC02185  | 0.597319297  | 2.00E-53  | postive  |
| TFAP2C    | AC010203.2 | 0.6127687    | 7.10E-57  | postive  |
| HBA1      | AC010203.2 | 0.514906701  | 7.95E-38  | postive  |
| TFAP2C    | AC011825.4 | 0.55205333   | 2.54E-44  | postive  |
| HBA1      | AC011825.4 | 0.494994927  | 1.16E-34  | postive  |
| BRD4      | AC069281.2 | 0.428478866  | 1.77E-25  | postive  |
| SETD1B    | AC069281.2 | 0.402233327  | 2.23E-22  | postive  |
| ALOX12    | AC069281.2 | 0.438724076  | 9.16E-27  | postive  |
| NCOA4     | AC069281.2 | -0.467072178 | 1.47E-30  | negative |
| PHKG2     | AC069281.2 | 0.709722911  | 9.79E-84  | postive  |
| ULK1      | AC069281.2 | 0.421478382  | 1.26E-24  | postive  |
| MAPK1     | AC069281.2 | -0.448487032 | 4.96E-28  | negative |
| TAZ       | AC069281.2 | 0.750219967  | 1.50E-98  | postive  |
| TUBE1     | AC092134.1 | 0.425916616  | 3.66E-25  | postive  |
| PHKG2     | AC092134.1 | 0.478187599  | 3.80E-32  | postive  |
| TAZ       | AC092134.1 | 0.501348552  | 1.20E-35  | postive  |
| ZNF419    | AC018845.3 | 0.468958231  | 7.98E-31  | postive  |

|           |            |              |           |          |
|-----------|------------|--------------|-----------|----------|
| KLHL24    | AC018845.3 | 0.409401467  | 3.38E-23  | postive  |
| GABPB1    | AC018845.3 | 0.458080523  | 2.57E-29  | postive  |
| LINC00472 | AC018845.3 | 0.656941243  | 7.06E-68  | postive  |
| LPIN1     | AC018845.3 | 0.492909733  | 2.43E-34  | postive  |
| ATM       | AC018845.3 | 0.424940068  | 4.81E-25  | postive  |
| RB1       | OTUD6B-AS1 | 0.416149787  | 5.48E-24  | postive  |
| HSPB1     | OTUD6B-AS1 | -0.400066449 | 3.91E-22  | negative |
| GCLC      | OTUD6B-AS1 | 0.483405361  | 6.51E-33  | postive  |
| PML       | OTUD6B-AS1 | -0.417327831 | 3.97E-24  | negative |
| ACSL3     | OTUD6B-AS1 | 0.623673561  | 1.99E-59  | postive  |
| CHMP5     | OTUD6B-AS1 | 0.518048565  | 2.41E-38  | postive  |
| KLHL24    | OTUD6B-AS1 | 0.59810434   | 1.35E-53  | postive  |
| MAP3K5    | OTUD6B-AS1 | 0.422929303  | 8.44E-25  | postive  |
| IREB2     | OTUD6B-AS1 | 0.615996463  | 1.28E-57  | postive  |
| EMC2      | OTUD6B-AS1 | 0.735998873  | 4.89E-93  | postive  |
| PIK3CA    | OTUD6B-AS1 | 0.586525457  | 4.01E-51  | postive  |
| SCP2      | OTUD6B-AS1 | 0.415210685  | 7.07E-24  | postive  |
| KRAS      | OTUD6B-AS1 | 0.596811496  | 2.58E-53  | postive  |
| ATG5      | OTUD6B-AS1 | 0.449947644  | 3.18E-28  | postive  |
| GABARAPL2 | OTUD6B-AS1 | 0.417414648  | 3.88E-24  | postive  |
| GABARAPL1 | OTUD6B-AS1 | 0.426167455  | 3.41E-25  | postive  |
| MAPK8     | OTUD6B-AS1 | 0.496169242  | 7.66E-35  | postive  |
| PRKAA2    | OTUD6B-AS1 | 0.551121498  | 3.79E-44  | postive  |
| PRKAA1    | OTUD6B-AS1 | 0.659995092  | 1.04E-68  | postive  |
| MTDH      | OTUD6B-AS1 | 0.488547316  | 1.11E-33  | postive  |
| SIRT1     | OTUD6B-AS1 | 0.41897404   | 2.53E-24  | postive  |
| HELLS     | AL157932.1 | 0.464415868  | 3.45E-30  | postive  |
| ALOX12    | AL157932.1 | 0.464711266  | 3.14E-30  | postive  |
| LINC00472 | AL157932.1 | 0.441273912  | 4.32E-27  | postive  |
| GPX4      | OIP5-AS1   | -0.400533719 | 3.46E-22  | negative |
| RB1       | OIP5-AS1   | 0.652882462  | 8.64E-67  | postive  |
| HSPB1     | OIP5-AS1   | -0.479635492 | 2.34E-32  | negative |
| HSF1      | OIP5-AS1   | -0.402243321 | 2.22E-22  | negative |
| GCLC      | OIP5-AS1   | 0.460917484  | 1.05E-29  | postive  |
| MTOR      | OIP5-AS1   | 0.441456823  | 4.09E-27  | postive  |
| ACSL3     | OIP5-AS1   | 0.495343142  | 1.03E-34  | postive  |
| OTUB1     | OIP5-AS1   | -0.460172938 | 1.33E-29  | negative |
| OXSRI     | OIP5-AS1   | 0.480494214  | 1.75E-32  | postive  |
| KLHL24    | OIP5-AS1   | 0.680480335  | 1.55E-74  | postive  |
| MAP3K5    | OIP5-AS1   | 0.514595771  | 8.94E-38  | postive  |
| MAPK14    | OIP5-AS1   | 0.481141946  | 1.40E-32  | postive  |
| EIF2AK4   | OIP5-AS1   | 0.461799576  | 7.95E-30  | postive  |
| IREB2     | OIP5-AS1   | 0.811076728  | 3.68E-127 | postive  |
| SP1       | OIP5-AS1   | 0.478834551  | 3.06E-32  | postive  |
| GABPB1    | OIP5-AS1   | 0.434754844  | 2.92E-26  | postive  |
| EMC2      | OIP5-AS1   | 0.503905552  | 4.73E-36  | postive  |
| PIK3CA    | OIP5-AS1   | 0.735559961  | 7.14E-93  | postive  |
| NRAS      | OIP5-AS1   | 0.55169664   | 2.96E-44  | postive  |
| KRAS      | OIP5-AS1   | 0.656129069  | 1.17E-67  | postive  |
| HRAS      | OIP5-AS1   | -0.466442859 | 1.80E-30  | negative |
| SLC38A1   | OIP5-AS1   | 0.56943195   | 1.19E-47  | postive  |
| ATG5      | OIP5-AS1   | 0.410242914  | 2.70E-23  | postive  |
| NCOA4     | OIP5-AS1   | 0.525284336  | 1.47E-39  | postive  |
| ULK2      | OIP5-AS1   | 0.455340356  | 6.04E-29  | postive  |
| MAPK1     | OIP5-AS1   | 0.491525536  | 3.94E-34  | postive  |
| MAPK8     | OIP5-AS1   | 0.600370593  | 4.32E-54  | postive  |
| MAPK9     | OIP5-AS1   | 0.494283973  | 1.49E-34  | postive  |
| LINC00472 | OIP5-AS1   | 0.507327036  | 1.35E-36  | postive  |

|           |            |              |          |          |
|-----------|------------|--------------|----------|----------|
| PRKAA2    | OIP5-AS1   | 0.690345094  | 1.62E-77 | postive  |
| PRKAA1    | OIP5-AS1   | 0.680506097  | 1.52E-74 | postive  |
| TGFBR1    | OIP5-AS1   | 0.490376942  | 5.89E-34 | postive  |
| ANO6      | OIP5-AS1   | 0.417152824  | 4.16E-24 | postive  |
| TLR4      | OIP5-AS1   | 0.528048029  | 4.95E-40 | postive  |
| ATM       | OIP5-AS1   | 0.595859324  | 4.15E-53 | postive  |
| MTDH      | OIP5-AS1   | 0.514092835  | 1.08E-37 | postive  |
| SIRT1     | OIP5-AS1   | 0.543321256  | 1.01E-42 | postive  |
| BACH1     | OIP5-AS1   | 0.518487437  | 2.04E-38 | postive  |
| ISCU      | AC144831.1 | 0.406244989  | 7.80E-23 | postive  |
| DDIT3     | AC144831.1 | 0.450700296  | 2.52E-28 | postive  |
| ATG4D     | AC144831.1 | 0.490279984  | 6.09E-34 | postive  |
| GABARAPL1 | AC144831.1 | 0.577551911  | 2.83E-49 | postive  |
| WIPI2     | AC144831.1 | 0.451986142  | 1.70E-28 | postive  |
| BAP1      | AC144831.1 | 0.443693566  | 2.10E-27 | postive  |
| LPIN1     | AC144831.1 | 0.543566344  | 9.15E-43 | postive  |
| FANCD2    | AC099778.1 | 0.464248444  | 3.64E-30 | postive  |
| ZNF419    | AC099778.1 | 0.513437334  | 1.38E-37 | postive  |
| ALOX12    | AC099778.1 | 0.512812387  | 1.75E-37 | postive  |
| TFAP2C    | AC099778.1 | 0.465501305  | 2.44E-30 | postive  |
| HBA1      | AC099778.1 | 0.41993001   | 1.94E-24 | postive  |
| DUOX1     | AC099778.1 | 0.422872885  | 8.58E-25 | postive  |
| SLC3A2    | AC022007.1 | 0.408907229  | 3.85E-23 | postive  |
| ISCU      | AC022007.1 | 0.52335989   | 3.11E-39 | postive  |
| ASNS      | AC022007.1 | 0.43333985   | 4.40E-26 | postive  |
| DDIT3     | AC022007.1 | 0.554423535  | 9.19E-45 | postive  |
| RIPK1     | AC022007.1 | -0.410928103 | 2.25E-23 | negative |
| ATG4D     | AC022007.1 | 0.510479864  | 4.19E-37 | postive  |
| MAP1LC3A  | AC022007.1 | 0.428347793  | 1.84E-25 | postive  |
| GABARAPL1 | AC022007.1 | 0.555636236  | 5.44E-45 | postive  |
| WIPI2     | AC022007.1 | 0.464183351  | 3.72E-30 | postive  |
| BAP1      | AC022007.1 | 0.559470632  | 1.02E-45 | postive  |
| LPIN1     | AC022007.1 | 0.535867908  | 2.16E-41 | postive  |
| ANO6      | DANCR      | -0.407008306 | 6.37E-23 | negative |
| ZNF419    | AC008982.2 | 0.422516009  | 9.48E-25 | postive  |
| VEGFA     | AC008982.2 | 0.414647246  | 8.24E-24 | postive  |
| TUBE1     | AC008982.2 | 0.444874873  | 1.47E-27 | postive  |
| SETD1B    | AC008982.2 | 0.435810675  | 2.15E-26 | postive  |
| MAFG      | AC008982.2 | 0.427903332  | 2.08E-25 | postive  |
| ALOX12    | AC008982.2 | 0.525554157  | 1.32E-39 | postive  |
| ATM       | AC008982.2 | 0.504641134  | 3.62E-36 | postive  |
| FBXW7     | AC008982.2 | 0.442656948  | 2.86E-27 | postive  |
| FANCD2    | AC023157.2 | 0.598916833  | 8.99E-54 | postive  |
| HELLS     | AC023157.2 | 0.414528465  | 8.51E-24 | postive  |
| RPL8      | PITPNA-AS1 | 0.430601039  | 9.67E-26 | postive  |
| ALOX12    | RERG-IT1   | 0.44975765   | 3.37E-28 | postive  |
| LINC00472 | RERG-IT1   | 0.584177265  | 1.24E-50 | postive  |
| ATM       | RERG-IT1   | 0.496065728  | 7.95E-35 | postive  |
| HMOX1     | AC110995.1 | 0.462606459  | 6.15E-30 | postive  |
| SLC40A1   | AC110995.1 | 0.631602719  | 2.39E-61 | postive  |
| CYBB      | AC110995.1 | 0.49645563   | 6.92E-35 | postive  |
| TLR4      | AC110995.1 | 0.463277404  | 4.97E-30 | postive  |
| FANCD2    | AP002807.1 | 0.437702193  | 1.24E-26 | postive  |
| BRD4      | AP002807.1 | 0.426296543  | 3.28E-25 | postive  |
| ZNF419    | AP002807.1 | 0.480820285  | 1.57E-32 | postive  |
| TUBE1     | AP002807.1 | 0.424683923  | 5.17E-25 | postive  |
| SETD1B    | AP002807.1 | 0.415425383  | 6.67E-24 | postive  |
| ALOX12    | AP002807.1 | 0.503530555  | 5.42E-36 | postive  |

|           |            |              |          |          |
|-----------|------------|--------------|----------|----------|
| PHKG2     | AP002807.1 | 0.553924455  | 1.14E-44 | postive  |
| TAZ       | AP002807.1 | 0.659190811  | 1.73E-68 | postive  |
| HELLS     | AC097505.1 | 0.472320299  | 2.66E-31 | postive  |
| TFAP2C    | AC097505.1 | 0.439321587  | 7.69E-27 | postive  |
| DUOX1     | AC097505.1 | 0.418380998  | 2.97E-24 | postive  |
| ATM       | AC097505.1 | 0.417814551  | 3.47E-24 | postive  |
| ZNF419    | AC010504.1 | 0.463556366  | 4.54E-30 | postive  |
| LINC00472 | AC010504.1 | 0.420031569  | 1.89E-24 | postive  |
| HSPB1     | AC109322.1 | 0.487715026  | 1.48E-33 | postive  |
| HSF1      | AC109322.1 | 0.435728425  | 2.20E-26 | postive  |
| SRC       | AC109322.1 | 0.402589119  | 2.03E-22 | postive  |
| NCOA4     | AC109322.1 | -0.410158361 | 2.76E-23 | negative |
| PHKG2     | AC109322.1 | 0.622699728  | 3.39E-59 | postive  |
| MAPK1     | AC109322.1 | -0.416022634 | 5.67E-24 | negative |
| ANO6      | AC109322.1 | -0.423644601 | 6.92E-25 | negative |
| TAZ       | AC109322.1 | 0.544659207  | 5.80E-43 | postive  |
| SIRT1     | AC109322.1 | -0.424879796 | 4.89E-25 | negative |
| ARNTL     | LINC00641  | 0.402285474  | 2.20E-22 | postive  |
| ZNF419    | LINC00641  | 0.416673648  | 4.75E-24 | postive  |
| VEGFA     | LINC00641  | 0.45895902   | 1.95E-29 | postive  |
| TUBE1     | LINC00641  | 0.549569148  | 7.34E-44 | postive  |
| SETD1B    | LINC00641  | 0.44194541   | 3.54E-27 | postive  |
| ALOX12    | LINC00641  | 0.508411879  | 9.03E-37 | postive  |
| IREB2     | LINC00641  | 0.428811249  | 1.61E-25 | postive  |
| GABPB1    | LINC00641  | 0.511663548  | 2.69E-37 | postive  |
| ZEB1      | LINC00641  | 0.4300857    | 1.12E-25 | postive  |
| MAPK8     | LINC00641  | 0.558853953  | 1.34E-45 | postive  |
| LINC00472 | LINC00641  | 0.516654332  | 4.10E-38 | postive  |
| ATM       | LINC00641  | 0.639198286  | 3.06E-63 | postive  |
| FBXW7     | LINC00641  | 0.446866299  | 8.10E-28 | postive  |
| HELLS     | AC008737.1 | 0.500838152  | 1.44E-35 | postive  |
| TUBE1     | AC008737.1 | 0.501503257  | 1.13E-35 | postive  |
| ALOX12    | AC008737.1 | 0.54239969   | 1.49E-42 | postive  |
| GABPB1    | AC008737.1 | 0.540868835  | 2.80E-42 | postive  |
| MAPK8     | AC008737.1 | 0.42580045   | 3.78E-25 | postive  |
| LINC00472 | AC008737.1 | 0.610493866  | 2.35E-56 | postive  |
| ATM       | AC008737.1 | 0.740130129  | 1.33E-94 | postive  |
| FBXW7     | AC008737.1 | 0.482660915  | 8.39E-33 | postive  |
| SLC2A12   | RAMP2-AS1  | 0.542469966  | 1.44E-42 | postive  |
| PLIN4     | RAMP2-AS1  | 0.480133152  | 1.97E-32 | postive  |
| ZEB1      | RAMP2-AS1  | 0.44754581   | 6.59E-28 | postive  |
| HSPA5     | TTC28-AS1  | -0.433822504 | 3.83E-26 | negative |
| ZNF419    | TTC28-AS1  | 0.586903563  | 3.34E-51 | postive  |
| VEGFA     | TTC28-AS1  | 0.629134404  | 9.59E-61 | postive  |
| TUBE1     | TTC28-AS1  | 0.664867016  | 4.72E-70 | postive  |
| SETD1B    | TTC28-AS1  | 0.42212921   | 1.06E-24 | postive  |
| ALOX12    | TTC28-AS1  | 0.646246325  | 4.79E-65 | postive  |
| GABPB1    | TTC28-AS1  | 0.445026944  | 1.41E-27 | postive  |
| ATM       | TTC28-AS1  | 0.52567638   | 1.26E-39 | postive  |
| TAZ       | TTC28-AS1  | 0.567601808  | 2.73E-47 | postive  |
| FBXW7     | TTC28-AS1  | 0.439483924  | 7.33E-27 | postive  |
| HELLS     | DLEU2      | 0.603042286  | 1.11E-54 | postive  |
| ZNF419    | DLEU2      | 0.407643296  | 5.39E-23 | postive  |
| KLHL24    | DLEU2      | 0.403669521  | 1.53E-22 | postive  |
| TUBE1     | DLEU2      | 0.521560291  | 6.25E-39 | postive  |
| ALOX12    | DLEU2      | 0.471966339  | 2.99E-31 | postive  |
| IREB2     | DLEU2      | 0.403216547  | 1.73E-22 | postive  |
| GABPB1    | DLEU2      | 0.650002759  | 5.00E-66 | postive  |



|           |            |              |           |          |
|-----------|------------|--------------|-----------|----------|
| ATG7      | DLEU2      | 0.424296158  | 5.76E-25  | postive  |
| MAPK8     | DLEU2      | 0.44668114   | 8.56E-28  | postive  |
| LINC00472 | DLEU2      | 0.732121829  | 1.35E-91  | postive  |
| ATM       | DLEU2      | 0.773386733  | 2.22E-108 | postive  |
| FBXW7     | DLEU2      | 0.564257816  | 1.23E-46  | postive  |
| GABARAPL1 | AC117386.2 | 0.487594457  | 1.55E-33  | postive  |
| KLHL24    | GPRC5D-AS1 | 0.453485124  | 1.07E-28  | postive  |
| LINC00472 | GPRC5D-AS1 | 0.549410342  | 7.85E-44  | postive  |
| LPIN1     | GPRC5D-AS1 | 0.460953095  | 1.04E-29  | postive  |
| OTUB1     | AC006449.6 | 0.441349781  | 4.22E-27  | postive  |
| NRAS      | AC006449.6 | -0.407892689 | 5.04E-23  | negative |
| PHKG2     | AC006449.6 | 0.586821806  | 3.48E-51  | postive  |
| MAPK1     | AC006449.6 | -0.412671056 | 1.41E-23  | negative |
| ANO6      | AC006449.6 | -0.455974038 | 4.96E-29  | negative |
| TAZ       | AC006449.6 | 0.516766663  | 3.93E-38  | postive  |
| HELLS     | AC138932.4 | 0.506550245  | 1.80E-36  | postive  |
| ZNF419    | AC138932.4 | 0.495471932  | 9.82E-35  | postive  |
| TUBE1     | AC138932.4 | 0.540842007  | 2.83E-42  | postive  |
| ALOX12    | AC138932.4 | 0.584652252  | 9.87E-51  | postive  |
| GABPB1    | AC138932.4 | 0.486500318  | 2.26E-33  | postive  |
| LINC00472 | AC138932.4 | 0.488525018  | 1.12E-33  | postive  |
| ATM       | AC138932.4 | 0.602455191  | 1.50E-54  | postive  |
| TAZ       | AC138932.4 | 0.406030458  | 8.25E-23  | postive  |
| FBXW7     | AC138932.4 | 0.485823635  | 2.85E-33  | postive  |
| ATG4D     | AC068338.2 | 0.448234154  | 5.35E-28  | postive  |
| HELLS     | AL596202.1 | 0.540602107  | 3.12E-42  | postive  |
| ZNF419    | AL596202.1 | 0.445336644  | 1.28E-27  | postive  |
| TUBE1     | AL596202.1 | 0.69666723   | 1.72E-79  | postive  |
| ALOX12    | AL596202.1 | 0.594131607  | 9.79E-53  | postive  |
| GABPB1    | AL596202.1 | 0.536528362  | 1.65E-41  | postive  |
| MAPK8     | AL596202.1 | 0.419311151  | 2.30E-24  | postive  |
| LINC00472 | AL596202.1 | 0.439930903  | 6.42E-27  | postive  |
| ATM       | AL596202.1 | 0.670743337  | 1.04E-71  | postive  |
| FBXW7     | AL596202.1 | 0.48813485   | 1.28E-33  | postive  |
| HELLS     | USP3-AS1   | 0.454333412  | 8.25E-29  | postive  |
| ZNF419    | USP3-AS1   | 0.433933546  | 3.71E-26  | postive  |
| KLHL24    | USP3-AS1   | 0.559488893  | 1.01E-45  | postive  |
| TUBE1     | USP3-AS1   | 0.502079893  | 9.18E-36  | postive  |
| IREB2     | USP3-AS1   | 0.421637771  | 1.21E-24  | postive  |
| GABPB1    | USP3-AS1   | 0.540586137  | 3.14E-42  | postive  |
| PIK3CA    | USP3-AS1   | 0.431958595  | 6.55E-26  | postive  |
| MAPK8     | USP3-AS1   | 0.415266908  | 6.96E-24  | postive  |
| LINC00472 | USP3-AS1   | 0.838005165  | 2.19E-143 | postive  |
| LPIN1     | USP3-AS1   | 0.454924359  | 6.87E-29  | postive  |
| ATM       | USP3-AS1   | 0.645291635  | 8.46E-65  | postive  |
| FBXW7     | USP3-AS1   | 0.459999505  | 1.40E-29  | postive  |
| PHKG2     | AC092535.5 | 0.406916698  | 6.53E-23  | postive  |
| PTGS2     | LINC01679  | 0.5010956    | 1.31E-35  | postive  |
| IL6       | LINC01679  | 0.633658346  | 7.43E-62  | postive  |
| SLC2A3    | LINC01679  | 0.543447748  | 9.62E-43  | postive  |
| FANCD2    | AC025682.1 | 0.463053003  | 5.33E-30  | postive  |
| HELLS     | AC025682.1 | 0.530556376  | 1.83E-40  | postive  |
| ZNF419    | AC025682.1 | 0.411622291  | 1.86E-23  | postive  |
| ALOX12    | AC025682.1 | 0.501589979  | 1.10E-35  | postive  |
| TFAP2C    | AC025682.1 | 0.419162831  | 2.40E-24  | postive  |
| HBA1      | AC025682.1 | 0.422533717  | 9.43E-25  | postive  |
| GABPB1    | AC025682.1 | 0.411616056  | 1.87E-23  | postive  |
| DUOX1     | AC025682.1 | 0.461650086  | 8.33E-30  | postive  |

|           |             |             |           |         |
|-----------|-------------|-------------|-----------|---------|
| HELLS     | AL590652.1  | 0.431197569 | 8.15E-26  | postive |
| ZNF419    | AL590652.1  | 0.468763725 | 8.50E-31  | postive |
| VEGFA     | AL590652.1  | 0.405960674 | 8.40E-23  | postive |
| TUBE1     | AL590652.1  | 0.574186141 | 1.35E-48  | postive |
| ALOX12    | AL590652.1  | 0.599472672 | 6.79E-54  | postive |
| GABPB1    | AL590652.1  | 0.428294937 | 1.87E-25  | postive |
| ATM       | AL590652.1  | 0.55074385  | 4.45E-44  | postive |
| HELLS     | AC110296.1  | 0.541503292 | 2.15E-42  | postive |
| GABPB1    | AC110296.1  | 0.496582649 | 6.62E-35  | postive |
| ATG7      | AC110296.1  | 0.463748811 | 4.27E-30  | postive |
| LINC00472 | AC110296.1  | 0.507566492 | 1.23E-36  | postive |
| ATM       | AC110296.1  | 0.713223363 | 6.49E-85  | postive |
| FBXW7     | AC110296.1  | 0.441234204 | 4.37E-27  | postive |
| HELLS     | SEPSECS-AS1 | 0.450906716 | 2.37E-28  | postive |
| TUBE1     | SEPSECS-AS1 | 0.502622496 | 7.54E-36  | postive |
| ALOX12    | SEPSECS-AS1 | 0.455515365 | 5.72E-29  | postive |
| GABPB1    | SEPSECS-AS1 | 0.504428983 | 3.91E-36  | postive |
| MAPK8     | SEPSECS-AS1 | 0.425196119 | 4.48E-25  | postive |
| LINC00472 | SEPSECS-AS1 | 0.488000833 | 1.34E-33  | postive |
| PRKAA2    | SEPSECS-AS1 | 0.417928269 | 3.37E-24  | postive |
| ATM       | SEPSECS-AS1 | 0.687601293 | 1.12E-76  | postive |
| FBXW7     | SEPSECS-AS1 | 0.429414689 | 1.36E-25  | postive |
| GABARAPL2 | ZNF561-AS1  | 0.436015203 | 2.02E-26  | postive |
| HELLS     | PAXBP1-AS1  | 0.445511235 | 1.22E-27  | postive |
| ARNTL     | PAXBP1-AS1  | 0.414026823 | 9.75E-24  | postive |
| ZNF419    | PAXBP1-AS1  | 0.477817084 | 4.30E-32  | postive |
| VEGFA     | PAXBP1-AS1  | 0.452956548 | 1.26E-28  | postive |
| TUBE1     | PAXBP1-AS1  | 0.642245562 | 5.14E-64  | postive |
| SETD1B    | PAXBP1-AS1  | 0.42834208  | 1.84E-25  | postive |
| ALOX12    | PAXBP1-AS1  | 0.679554866 | 2.90E-74  | postive |
| IREB2     | PAXBP1-AS1  | 0.428520805 | 1.75E-25  | postive |
| SP1       | PAXBP1-AS1  | 0.446504373 | 9.03E-28  | postive |
| GABPB1    | PAXBP1-AS1  | 0.549311464 | 8.19E-44  | postive |
| MAPK8     | PAXBP1-AS1  | 0.558951183 | 1.28E-45  | postive |
| LINC00472 | PAXBP1-AS1  | 0.515300964 | 6.85E-38  | postive |
| ATM       | PAXBP1-AS1  | 0.800242465 | 2.37E-121 | postive |
| YY1AP1    | PAXBP1-AS1  | 0.426613441 | 3.00E-25  | postive |
| FBXW7     | PAXBP1-AS1  | 0.481675508 | 1.17E-32  | postive |
| ZNF419    | SNHG14      | 0.448558289 | 4.85E-28  | postive |
| KLHL24    | SNHG14      | 0.533740444 | 5.11E-41  | postive |
| TUBE1     | SNHG14      | 0.53688441  | 1.43E-41  | postive |
| ALOX12    | SNHG14      | 0.400774398 | 3.26E-22  | postive |
| IREB2     | SNHG14      | 0.563678258 | 1.59E-46  | postive |
| GABPB1    | SNHG14      | 0.566065762 | 5.46E-47  | postive |
| EMC2      | SNHG14      | 0.419066754 | 2.46E-24  | postive |
| PIK3CA    | SNHG14      | 0.484438953 | 4.58E-33  | postive |
| KRAS      | SNHG14      | 0.41731429  | 3.98E-24  | postive |
| MAPK8     | SNHG14      | 0.527571651 | 5.97E-40  | postive |
| LINC00472 | SNHG14      | 0.775804054 | 1.79E-109 | postive |
| PRKAA2    | SNHG14      | 0.433851246 | 3.79E-26  | postive |
| PRKAA1    | SNHG14      | 0.503731013 | 5.04E-36  | postive |
| ATM       | SNHG14      | 0.643569772 | 2.35E-64  | postive |
| ISCU      | LINC01003   | 0.450528271 | 2.66E-28  | postive |
| CHMP5     | LINC01003   | 0.404170608 | 1.34E-22  | postive |
| ATG4D     | LINC01003   | 0.455776678 | 5.27E-29  | postive |
| GABARAPL2 | LINC01003   | 0.490361151 | 5.92E-34  | postive |
| HELLS     | AL133243.3  | 0.628512436 | 1.36E-60  | postive |
| ZNF419    | AL133243.3  | 0.418364761 | 2.99E-24  | postive |

|           |            |              |           |          |
|-----------|------------|--------------|-----------|----------|
| TUBE1     | AL133243.3 | 0.489726266  | 7.39E-34  | postive  |
| ALOX12    | AL133243.3 | 0.457276533  | 3.30E-29  | postive  |
| GABPB1    | AL133243.3 | 0.610922302  | 1.88E-56  | postive  |
| ATG7      | AL133243.3 | 0.440154381  | 6.01E-27  | postive  |
| LINC00472 | AL133243.3 | 0.660755488  | 6.46E-69  | postive  |
| ATM       | AL133243.3 | 0.72577696   | 2.73E-89  | postive  |
| FBXW7     | AL133243.3 | 0.5642009    | 1.26E-46  | postive  |
| ATM       | AC023794.1 | 0.402473667  | 2.09E-22  | postive  |
| TRIB3     | LINC02609  | 0.419516101  | 2.18E-24  | postive  |
| ZNF419    | AC027271.1 | 0.438747574  | 9.10E-27  | postive  |
| NOX1      | AC027271.1 | 0.419501356  | 2.18E-24  | postive  |
| PHKG2     | AC027271.1 | 0.553445519  | 1.40E-44  | postive  |
| BECN1     | AC027271.1 | -0.451424171 | 2.02E-28  | negative |
| TAZ       | AC027271.1 | 0.570516943  | 7.28E-48  | postive  |
| HELLS     | AL031717.1 | 0.441752704  | 3.74E-27  | postive  |
| ZNF419    | AL031717.1 | 0.522265892  | 4.75E-39  | postive  |
| TUBE1     | AL031717.1 | 0.537353806  | 1.18E-41  | postive  |
| SETD1B    | AL031717.1 | 0.449673346  | 3.45E-28  | postive  |
| ALOX12    | AL031717.1 | 0.627663208  | 2.18E-60  | postive  |
| GABPB1    | AL031717.1 | 0.463792063  | 4.21E-30  | postive  |
| LINC00472 | AL031717.1 | 0.530499994  | 1.87E-40  | postive  |
| ATM       | AL031717.1 | 0.585833721  | 5.60E-51  | postive  |
| FBXW7     | AL031717.1 | 0.500560584  | 1.59E-35  | postive  |
| HELLS     | APOA1-AS   | 0.438952474  | 8.57E-27  | postive  |
| ZNF419    | APOA1-AS   | 0.405148037  | 1.04E-22  | postive  |
| KLHL24    | APOA1-AS   | 0.492564553  | 2.74E-34  | postive  |
| TUBE1     | APOA1-AS   | 0.451283545  | 2.11E-28  | postive  |
| ALOX12    | APOA1-AS   | 0.443133358  | 2.48E-27  | postive  |
| IREB2     | APOA1-AS   | 0.458877007  | 2.00E-29  | postive  |
| GABPB1    | APOA1-AS   | 0.561485307  | 4.20E-46  | postive  |
| PIK3CA    | APOA1-AS   | 0.46028601   | 1.28E-29  | postive  |
| MAPK8     | APOA1-AS   | 0.459660864  | 1.56E-29  | postive  |
| LINC00472 | APOA1-AS   | 0.881723315  | 2.41E-177 | postive  |
| ATM       | APOA1-AS   | 0.627777263  | 2.05E-60  | postive  |
| FBXW7     | APOA1-AS   | 0.458463894  | 2.28E-29  | postive  |
| ZNF419    | AL161729.4 | 0.555646766  | 5.41E-45  | postive  |
| TUBE1     | AL161729.4 | 0.4228695    | 8.59E-25  | postive  |
| ALOX12    | AL161729.4 | 0.40718986   | 6.07E-23  | postive  |
| PHKG2     | AL161729.4 | 0.466406768  | 1.82E-30  | postive  |
| ULK1      | AL161729.4 | 0.404093082  | 1.37E-22  | postive  |
| TAZ       | AL161729.4 | 0.605342932  | 3.41E-55  | postive  |
| BRD4      | AC084018.1 | 0.46568923   | 2.29E-30  | postive  |
| ZNF419    | AC084018.1 | 0.563569666  | 1.67E-46  | postive  |
| VEGFA     | AC084018.1 | 0.46832946   | 9.78E-31  | postive  |
| TUBE1     | AC084018.1 | 0.504291979  | 4.11E-36  | postive  |
| SETD1B    | AC084018.1 | 0.602297676  | 1.62E-54  | postive  |
| ALOX12    | AC084018.1 | 0.609124853  | 4.81E-56  | postive  |
| ULK1      | AC084018.1 | 0.418310653  | 3.03E-24  | postive  |
| TAZ       | AC084018.1 | 0.548927403  | 9.64E-44  | postive  |
| CYBB      | NCK1-DT    | 0.455717305  | 5.37E-29  | postive  |
| ATG7      | NCK1-DT    | 0.40973378   | 3.09E-23  | postive  |
| TLR4      | NCK1-DT    | 0.413497441  | 1.12E-23  | postive  |
| ATM       | NCK1-DT    | 0.513052219  | 1.60E-37  | postive  |
| PHKG2     | AP001437.1 | 0.436673029  | 1.67E-26  | postive  |
| TAZ       | AP001437.1 | 0.468797958  | 8.40E-31  | postive  |
| HELLS     | LINC02605  | 0.544815914  | 5.44E-43  | postive  |
| ALOX12    | LINC02605  | 0.435001171  | 2.72E-26  | postive  |
| GABPB1    | LINC02605  | 0.482808769  | 7.98E-33  | postive  |

|           |            |             |           |         |
|-----------|------------|-------------|-----------|---------|
| LINC00472 | LINC02605  | 0.498768832 | 3.03E-35  | postive |
| ATM       | LINC02605  | 0.70169095  | 4.26E-81  | postive |
| FBXW7     | LINC02605  | 0.459716508 | 1.54E-29  | postive |
| ZNF419    | LINC01252  | 0.409967803 | 2.90E-23  | postive |
| ALOX12    | LINC01252  | 0.40170233  | 2.56E-22  | postive |
| TFAP2C    | LINC01252  | 0.447987045 | 5.77E-28  | postive |
| GOT1      | ALDH1L1-AS | 0.422053189 | 1.08E-24  | postive |
| PEBP1     | ALDH1L1-AS | 0.425326982 | 4.32E-25  | postive |
| SP1       | AL662791.1 | 0.403851839 | 1.46E-22  | postive |
| HELLS     | AC007319.1 | 0.533652841 | 5.29E-41  | postive |
| TUBE1     | AC007319.1 | 0.438317774 | 1.03E-26  | postive |
| ALOX12    | AC007319.1 | 0.420445648 | 1.68E-24  | postive |
| GABPB1    | AC007319.1 | 0.543823314 | 8.22E-43  | postive |
| ATG7      | AC007319.1 | 0.471556957 | 3.42E-31  | postive |
| MAPK8     | AC007319.1 | 0.407868116 | 5.08E-23  | postive |
| LINC00472 | AC007319.1 | 0.653396605 | 6.31E-67  | postive |
| ATM       | AC007319.1 | 0.752286758 | 2.20E-99  | postive |
| FBXW7     | AC007319.1 | 0.470837823 | 4.32E-31  | postive |
| KLHL24    | AC024145.1 | 0.518420429 | 2.09E-38  | postive |
| GABPB1    | AC024145.1 | 0.429977563 | 1.16E-25  | postive |
| LINC00472 | AC024145.1 | 0.857211563 | 6.73E-157 | postive |
| LPIN1     | AC024145.1 | 0.418554871 | 2.84E-24  | postive |
| ZNF419    | AC011468.5 | 0.448824301 | 4.47E-28  | postive |
| TUBE1     | AC011468.5 | 0.499950126 | 1.98E-35  | postive |
| ALOX12    | AC011468.5 | 0.412430248 | 1.50E-23  | postive |
| GABPB1    | AC011468.5 | 0.466002952 | 2.07E-30  | postive |
| HELLS     | AL353801.3 | 0.460829943 | 1.08E-29  | postive |
| ZNF419    | AL353801.3 | 0.458726704 | 2.10E-29  | postive |
| TUBE1     | AL353801.3 | 0.532686944 | 7.80E-41  | postive |
| ALOX12    | AL353801.3 | 0.599963576 | 5.30E-54  | postive |
| GABPB1    | AL353801.3 | 0.447572184 | 6.54E-28  | postive |
| ATM       | AL353801.3 | 0.562841791 | 2.30E-46  | postive |
| TAZ       | AL353801.3 | 0.442198292 | 3.28E-27  | postive |
| FBXW7     | AL353801.3 | 0.405864727 | 8.62E-23  | postive |
| IREB2     | HCG11      | 0.408482066 | 4.31E-23  | postive |
| SP1       | HCG11      | 0.436873269 | 1.58E-26  | postive |
| PRKAA2    | HCG11      | 0.437059109 | 1.49E-26  | postive |
| ATM       | HCG11      | 0.448934432 | 4.33E-28  | postive |
| SIRT1     | HCG11      | 0.41338458  | 1.16E-23  | postive |
| HELLS     | AC121761.2 | 0.406494478 | 7.30E-23  | postive |
| TUBE1     | AC121761.2 | 0.488472025 | 1.14E-33  | postive |
| GABPB1    | AC121761.2 | 0.405496345 | 9.50E-23  | postive |
| ATM       | AC121761.2 | 0.464139035 | 3.77E-30  | postive |
| TFAP2C    | AC026979.2 | 0.420616751 | 1.61E-24  | postive |
| HBA1      | AC026979.2 | 0.599908131 | 5.45E-54  | postive |
| HRAS      | AC026979.2 | 0.471332068 | 3.68E-31  | postive |
| EGLN2     | AC026979.2 | 0.419829752 | 2.00E-24  | postive |
| HELLS     | AC009948.2 | 0.534818473 | 3.31E-41  | postive |
| GABPB1    | AC009948.2 | 0.486912659 | 1.96E-33  | postive |
| ATG7      | AC009948.2 | 0.411084378 | 2.15E-23  | postive |
| LINC00472 | AC009948.2 | 0.480638433 | 1.67E-32  | postive |
| ATM       | AC009948.2 | 0.554702512 | 8.14E-45  | postive |
| FH        | AC010776.2 | 0.411725194 | 1.81E-23  | postive |
| ISCU      | AC010776.2 | 0.513210724 | 1.51E-37  | postive |
| GPT2      | AC010776.2 | 0.4338858   | 3.76E-26  | postive |
| HERPUD1   | AC010776.2 | 0.448809976 | 4.49E-28  | postive |
| KLHL24    | AC010776.2 | 0.470910968 | 4.22E-31  | postive |
| SLC2A12   | AC010776.2 | 0.510497509 | 4.16E-37  | postive |

|           |            |             |           |         |
|-----------|------------|-------------|-----------|---------|
| GOT1      | AC010776.2 | 0.424497588 | 5.45E-25  | postive |
| ATG4D     | AC010776.2 | 0.455383181 | 5.96E-29  | postive |
| GABARAPL1 | AC010776.2 | 0.732509362 | 9.73E-92  | postive |
| WIP1      | AC010776.2 | 0.517002216 | 3.59E-38  | postive |
| LPIN1     | AC010776.2 | 0.524115385 | 2.32E-39  | postive |
| BRD4      | AC011472.1 | 0.45756604  | 3.02E-29  | postive |
| ZNF419    | AC011472.1 | 0.548096339 | 1.37E-43  | postive |
| VEGFA     | AC011472.1 | 0.59138615  | 3.78E-52  | postive |
| TUBE1     | AC011472.1 | 0.503680365 | 5.13E-36  | postive |
| SETD1B    | AC011472.1 | 0.441174306 | 4.45E-27  | postive |
| DRD4      | AC011472.1 | 0.414072089 | 9.63E-24  | postive |
| ALOX12    | AC011472.1 | 0.589967325 | 7.57E-52  | postive |
| TAZ       | AC011472.1 | 0.553196696 | 1.56E-44  | postive |
| HELLS     | NUTM2A-AS  | 0.497426076 | 4.90E-35  | postive |
| TUBE1     | NUTM2A-AS  | 0.437142927 | 1.46E-26  | postive |
| ALOX12    | NUTM2A-AS  | 0.417078834 | 4.25E-24  | postive |
| IREB2     | NUTM2A-AS  | 0.430271778 | 1.06E-25  | postive |
| GABPB1    | NUTM2A-AS  | 0.491942302 | 3.41E-34  | postive |
| MAPK8     | NUTM2A-AS  | 0.521121277 | 7.40E-39  | postive |
| LINC00472 | NUTM2A-AS  | 0.428453073 | 1.78E-25  | postive |
| ATM       | NUTM2A-AS  | 0.596126244 | 3.63E-53  | postive |
| ISCU      | AL031123.1 | 0.574425061 | 1.21E-48  | postive |
| TMBIM4    | AL031123.1 | 0.437133692 | 1.46E-26  | postive |
| CHMP5     | AL031123.1 | 0.439970823 | 6.35E-27  | postive |
| ATG4D     | AL031123.1 | 0.414066801 | 9.64E-24  | postive |
| GABARAPL2 | AL031123.1 | 0.425910883 | 3.66E-25  | postive |
| GABARAPL1 | AL031123.1 | 0.415778116 | 6.06E-24  | postive |
| MAPK1     | AC027458.1 | 0.404771882 | 1.15E-22  | postive |
| PRKAA2    | AC027458.1 | 0.41177974  | 1.79E-23  | postive |
| ZNF419    | AC023908.3 | 0.546521669 | 2.66E-43  | postive |
| TUBE1     | AC023908.3 | 0.573880548 | 1.56E-48  | postive |
| SETD1B    | AC023908.3 | 0.483135696 | 7.14E-33  | postive |
| ALOX12    | AC023908.3 | 0.639398206 | 2.72E-63  | postive |
| GABPB1    | AC023908.3 | 0.409717919 | 3.10E-23  | postive |
| PHKG2     | AC023908.3 | 0.515459676 | 6.45E-38  | postive |
| ATM       | AC023908.3 | 0.418595215 | 2.80E-24  | postive |
| TAZ       | AC023908.3 | 0.576838127 | 3.95E-49  | postive |
| HRAS      | AC025754.2 | 0.477151759 | 5.37E-32  | postive |
| ISCU      | AC007996.1 | 0.401104224 | 2.99E-22  | postive |
| KLHL24    | AC007996.1 | 0.613177056 | 5.72E-57  | postive |
| PIK3CA    | AC007996.1 | 0.425876462 | 3.70E-25  | postive |
| KRAS      | AC007996.1 | 0.414666551 | 8.20E-24  | postive |
| GABARAPL1 | AC007996.1 | 0.488337353 | 1.20E-33  | postive |
| LINC00472 | AC007996.1 | 0.782794919 | 1.03E-112 | postive |
| LPIN1     | AC007996.1 | 0.572593474 | 2.82E-48  | postive |
| CA9       | SAP30-DT   | 0.445161508 | 1.35E-27  | postive |
| BNIP3     | SAP30-DT   | 0.404121825 | 1.36E-22  | postive |
| VEGFA     | SAP30-DT   | 0.531877489 | 1.08E-40  | postive |
| HILPDA    | SAP30-DT   | 0.44154526  | 3.98E-27  | postive |
| HELLS     | AC013403.2 | 0.507139829 | 1.45E-36  | postive |
| ZNF419    | AC013403.2 | 0.509440608 | 6.17E-37  | postive |
| TUBE1     | AC013403.2 | 0.558345028 | 1.67E-45  | postive |
| ALOX12    | AC013403.2 | 0.62718759  | 2.85E-60  | postive |
| GABPB1    | AC013403.2 | 0.491359599 | 4.18E-34  | postive |
| DUOX1     | AC013403.2 | 0.401296499 | 2.84E-22  | postive |
| LINC00472 | AC013403.2 | 0.487013925 | 1.89E-33  | postive |
| ATM       | AC013403.2 | 0.495245733 | 1.06E-34  | postive |
| FBXW7     | AC013403.2 | 0.459000865 | 1.92E-29  | postive |

|           |            |              |          |          |
|-----------|------------|--------------|----------|----------|
| ZNF419    | AC124045.1 | 0.525176759  | 1.53E-39 | postive  |
| HIC1      | AC124045.1 | 0.402895338  | 1.88E-22 | postive  |
| GABPB1    | AC124045.1 | 0.586034933  | 5.08E-51 | postive  |
| ZEB1      | AC124045.1 | 0.489782925  | 7.24E-34 | postive  |
| LINC00472 | AC124045.1 | 0.403433503  | 1.63E-22 | postive  |
| FBXW7     | AC124045.1 | 0.476254664  | 7.24E-32 | postive  |
| RB1       | AC011477.2 | 0.470393786  | 5.00E-31 | postive  |
| HSPB1     | AC011477.2 | -0.40447339  | 1.24E-22 | negative |
| KLHL24    | AC011477.2 | 0.524201702  | 2.24E-39 | postive  |
| MAP3K5    | AC011477.2 | 0.446129617  | 1.01E-27 | postive  |
| MAPK14    | AC011477.2 | 0.421289969  | 1.33E-24 | postive  |
| IREB2     | AC011477.2 | 0.598901454  | 9.06E-54 | postive  |
| SP1       | AC011477.2 | 0.512243467  | 2.17E-37 | postive  |
| PIK3CA    | AC011477.2 | 0.500823688  | 1.45E-35 | postive  |
| KRAS      | AC011477.2 | 0.445567971  | 1.20E-27 | postive  |
| SLC38A1   | AC011477.2 | 0.428747148  | 1.64E-25 | postive  |
| NCOA4     | AC011477.2 | 0.42853549   | 1.74E-25 | postive  |
| ULK2      | AC011477.2 | 0.473553289  | 1.77E-31 | postive  |
| MAPK8     | AC011477.2 | 0.515053076  | 7.52E-38 | postive  |
| MAPK9     | AC011477.2 | 0.436059409  | 2.00E-26 | postive  |
| PRKAA2    | AC011477.2 | 0.53945851   | 5.00E-42 | postive  |
| PRKAA1    | AC011477.2 | 0.501904992  | 9.79E-36 | postive  |
| ATM       | AC011477.2 | 0.492471036  | 2.83E-34 | postive  |
| SIRT1     | AC011477.2 | 0.415286567  | 6.93E-24 | postive  |
| TFAP2C    | LINC02255  | 0.587465304  | 2.55E-51 | postive  |
| HBA1      | LINC02255  | 0.526837943  | 7.97E-40 | postive  |
| HELLS     | AC084824.4 | 0.515670021  | 5.96E-38 | postive  |
| TUBE1     | AC084824.4 | 0.510814927  | 3.70E-37 | postive  |
| GABPB1    | AC084824.4 | 0.510251063  | 4.56E-37 | postive  |
| MAPK3     | AC084824.4 | -0.414234257 | 9.22E-24 | negative |
| LINC00472 | AC084824.4 | 0.60687271   | 1.55E-55 | postive  |
| ATM       | AC084824.4 | 0.524397897  | 2.07E-39 | postive  |
| FBXW7     | AC084824.4 | 0.441826731  | 3.66E-27 | postive  |
| NOX1      | AC060766.3 | 0.404253943  | 1.32E-22 | postive  |
| HRAS      | AC060766.3 | 0.423989899  | 6.28E-25 | postive  |
| EGLN2     | AC060766.3 | 0.443558255  | 2.19E-27 | postive  |
| BAP1      | AC103974.1 | 0.414776946  | 7.96E-24 | postive  |
| TFAP2C    | REV3L-IT1  | 0.573940926  | 1.51E-48 | postive  |
| HBA1      | REV3L-IT1  | 0.517518864  | 2.95E-38 | postive  |
| DUOX1     | REV3L-IT1  | 0.42784729   | 2.12E-25 | postive  |
| HELLS     | STARD13-AS | 0.532576334  | 8.16E-41 | postive  |
| TUBE1     | STARD13-AS | 0.409617177  | 3.19E-23 | postive  |
| ALOX12    | STARD13-AS | 0.404034452  | 1.39E-22 | postive  |
| GABPB1    | STARD13-AS | 0.508819232  | 7.77E-37 | postive  |
| ATG7      | STARD13-AS | 0.431599283  | 7.26E-26 | postive  |
| LINC00472 | STARD13-AS | 0.582937813  | 2.24E-50 | postive  |
| ATM       | STARD13-AS | 0.719734771  | 3.74E-87 | postive  |
| FBXW7     | STARD13-AS | 0.446079233  | 1.03E-27 | postive  |
| HELLS     | DLEU1      | 0.436573438  | 1.72E-26 | postive  |
| TUBE1     | DLEU1      | 0.415110457  | 7.27E-24 | postive  |
| IREB2     | DLEU1      | 0.437677971  | 1.25E-26 | postive  |
| GABPB1    | DLEU1      | 0.412546873  | 1.45E-23 | postive  |
| MAPK8     | DLEU1      | 0.445263647  | 1.31E-27 | postive  |
| LINC00472 | DLEU1      | 0.5683111    | 1.98E-47 | postive  |
| PRKAA2    | DLEU1      | 0.455358581  | 6.01E-29 | postive  |
| ATM       | DLEU1      | 0.600321896  | 4.42E-54 | postive  |
| OTUB1     | AC026304.1 | 0.446473791  | 9.12E-28 | postive  |
| HRAS      | AC026304.1 | 0.445242042  | 1.32E-27 | postive  |

|           |            |              |           |          |
|-----------|------------|--------------|-----------|----------|
| PHKG2     | AC026304.1 | 0.478665163  | 3.24E-32  | postive  |
| ZNF419    | AL360181.2 | 0.438251809  | 1.05E-26  | postive  |
| VEGFA     | AL360181.2 | 0.505071747  | 3.09E-36  | postive  |
| TUBE1     | AL360181.2 | 0.488950653  | 9.67E-34  | postive  |
| SETD1B    | AL360181.2 | 0.510979354  | 3.48E-37  | postive  |
| ALOX12    | AL360181.2 | 0.652816997  | 9.00E-67  | postive  |
| PHKG2     | AL360181.2 | 0.424874856  | 4.90E-25  | postive  |
| TAZ       | AL360181.2 | 0.577771825  | 2.56E-49  | postive  |
| DDIT3     | LINC02761  | 0.428157701  | 1.94E-25  | postive  |
| MAP1LC3A  | LINC02761  | 0.445239341  | 1.32E-27  | postive  |
| TUBE1     | AC093726.2 | 0.40881241   | 3.95E-23  | postive  |
| ALOX12    | AC093726.2 | 0.429167472  | 1.46E-25  | postive  |
| NCOA4     | AC093726.2 | -0.480830281 | 1.56E-32  | negative |
| PHKG2     | AC093726.2 | 0.566343086  | 4.82E-47  | postive  |
| TAZ       | AC093726.2 | 0.643254485  | 2.83E-64  | postive  |
| ENPP2     | AC073636.1 | 0.511381804  | 2.99E-37  | postive  |
| VEGFA     | AC073636.1 | 0.422628194  | 9.18E-25  | postive  |
| MAPK8     | AC073636.1 | 0.408530821  | 4.26E-23  | postive  |
| ATM       | AC073636.1 | 0.441781094  | 3.71E-27  | postive  |
| SIRT1     | AC073636.1 | 0.410037703  | 2.85E-23  | postive  |
| HBA1      | AC099791.2 | 0.440404998  | 5.58E-27  | postive  |
| HRAS      | AC099791.2 | 0.46821528   | 1.02E-30  | postive  |
| PHKG2     | AC099791.2 | 0.500686558  | 1.52E-35  | postive  |
| EGLN2     | AC099791.2 | 0.482252158  | 9.64E-33  | postive  |
| TAZ       | AC099791.2 | 0.528157774  | 4.74E-40  | postive  |
| HELLS     | AC025164.1 | 0.507537447  | 1.25E-36  | postive  |
| TUBE1     | AC025164.1 | 0.493280421  | 2.13E-34  | postive  |
| ALOX12    | AC025164.1 | 0.533401948  | 5.85E-41  | postive  |
| GABPB1    | AC025164.1 | 0.447733664  | 6.23E-28  | postive  |
| ATM       | AC025164.1 | 0.623533294  | 2.15E-59  | postive  |
| FBXW7     | AC025164.1 | 0.431111819  | 8.35E-26  | postive  |
| HELLS     | AC027607.1 | 0.406905192  | 6.55E-23  | postive  |
| ZNF419    | AC027607.1 | 0.460745866  | 1.11E-29  | postive  |
| TUBE1     | AC027607.1 | 0.504525809  | 3.77E-36  | postive  |
| ALOX12    | AC027607.1 | 0.474934277  | 1.12E-31  | postive  |
| GABPB1    | AC027607.1 | 0.536017482  | 2.04E-41  | postive  |
| LINC00472 | AC027607.1 | 0.681232939  | 9.25E-75  | postive  |
| ATM       | AC027607.1 | 0.575624429  | 6.95E-49  | postive  |
| FBXW7     | AC027607.1 | 0.511999889  | 2.37E-37  | postive  |
| CHMP6     | AC067852.2 | 0.504713392  | 3.52E-36  | postive  |
| BAP1      | AC067852.2 | 0.422920717  | 8.46E-25  | postive  |
| HELLS     | MANEA-DT   | 0.556397033  | 3.91E-45  | postive  |
| ZNF419    | MANEA-DT   | 0.528159455  | 4.73E-40  | postive  |
| TUBE1     | MANEA-DT   | 0.705740414  | 2.04E-82  | postive  |
| ALOX12    | MANEA-DT   | 0.656650511  | 8.45E-68  | postive  |
| GABPB1    | MANEA-DT   | 0.60874009   | 5.88E-56  | postive  |
| MAPK8     | MANEA-DT   | 0.416559248  | 4.90E-24  | postive  |
| LINC00472 | MANEA-DT   | 0.481195762  | 1.38E-32  | postive  |
| ATM       | MANEA-DT   | 0.753593403  | 6.49E-100 | postive  |
| FBXW7     | MANEA-DT   | 0.547173079  | 2.02E-43  | postive  |
| SLC40A1   | AC139530.1 | -0.404128349 | 1.36E-22  | negative |
| OTUB1     | AC139530.1 | 0.401241584  | 2.88E-22  | postive  |
| LAMP2     | AC139530.1 | -0.417518647 | 3.77E-24  | negative |
| CHMP6     | AC139530.1 | 0.410440912  | 2.56E-23  | postive  |
| ZNF419    | AC139530.1 | 0.403243723  | 1.71E-22  | postive  |
| DRD4      | AC139530.1 | 0.437928896  | 1.16E-26  | postive  |
| ALOX12    | AC139530.1 | 0.457442796  | 3.14E-29  | postive  |
| NRAS      | AC139530.1 | -0.418866889 | 2.60E-24  | negative |

|           |            |              |          |          |
|-----------|------------|--------------|----------|----------|
| HRAS      | AC139530.1 | 0.55880053   | 1.37E-45 | postive  |
| NCOA4     | AC139530.1 | -0.474347704 | 1.36E-31 | negative |
| PHKG2     | AC139530.1 | 0.618780914  | 2.86E-58 | postive  |
| ANO6      | AC139530.1 | -0.459843655 | 1.48E-29 | negative |
| EGLN2     | AC139530.1 | 0.438509947  | 9.76E-27 | postive  |
| TAZ       | AC139530.1 | 0.706314968  | 1.32E-82 | postive  |
| MTDH      | AC139530.1 | -0.454504051 | 7.83E-29 | negative |
| BACH1     | AC139530.1 | -0.424433101 | 5.55E-25 | negative |
| FANCD2    | AL021707.7 | 0.405023993  | 1.08E-22 | postive  |
| ALOX12    | AL021707.7 | 0.440471117  | 5.47E-27 | postive  |
| TFAP2C    | AL021707.7 | 0.531430408  | 1.29E-40 | postive  |
| HBA1      | AL021707.7 | 0.477824019  | 4.29E-32 | postive  |
| DUOX1     | AL021707.7 | 0.427972393  | 2.04E-25 | postive  |
| ZNF419    | AC005479.2 | 0.404023697  | 1.40E-22 | postive  |
| ALOX12    | AC005479.2 | 0.422599051  | 9.26E-25 | postive  |
| ATM       | AC005479.2 | 0.413641057  | 1.08E-23 | postive  |
| ISCU      | AC009570.1 | 0.455264051  | 6.18E-29 | postive  |
| ATG4D     | AC009570.1 | 0.458443656  | 2.29E-29 | postive  |
| GABARAPL1 | AC009570.1 | 0.50456621   | 3.72E-36 | postive  |
| LINC00472 | AC009570.1 | 0.489309174  | 8.54E-34 | postive  |
| HELLS     | AC073218.1 | 0.437580211  | 1.28E-26 | postive  |
| ALOX12    | AC073218.1 | 0.438675794  | 9.29E-27 | postive  |
| ATM       | AC073218.1 | 0.586411474  | 4.24E-51 | postive  |
| VEGFA     | LMNTD2-AS. | 0.478803882  | 3.09E-32 | postive  |
| TUBE1     | LMNTD2-AS. | 0.432748208  | 5.22E-26 | postive  |
| ALOX12    | LMNTD2-AS. | 0.484198015  | 4.97E-33 | postive  |
| PHKG2     | LMNTD2-AS. | 0.519538558  | 1.36E-38 | postive  |
| TAZ       | LMNTD2-AS. | 0.640384417  | 1.53E-63 | postive  |
| HELLS     | AL513550.1 | 0.505373649  | 2.77E-36 | postive  |
| ZNF419    | AL513550.1 | 0.436205381  | 1.92E-26 | postive  |
| KLHL24    | AL513550.1 | 0.415748447  | 6.11E-24 | postive  |
| TUBE1     | AL513550.1 | 0.517012588  | 3.58E-38 | postive  |
| ALOX12    | AL513550.1 | 0.517791321  | 2.66E-38 | postive  |
| IREB2     | AL513550.1 | 0.403283145  | 1.70E-22 | postive  |
| GABPB1    | AL513550.1 | 0.533194871  | 6.36E-41 | postive  |
| MAPK8     | AL513550.1 | 0.406644212  | 7.02E-23 | postive  |
| LINC00472 | AL513550.1 | 0.510556637  | 4.07E-37 | postive  |
| LPIN1     | AL513550.1 | 0.407165377  | 6.11E-23 | postive  |
| ATM       | AL513550.1 | 0.611129756  | 1.68E-56 | postive  |
| FBXW7     | AL513550.1 | 0.464365148  | 3.51E-30 | postive  |
| HELLS     | MIR155HG   | 0.423937517  | 6.37E-25 | postive  |
| PHKG2     | MIR155HG   | 0.410649765  | 2.42E-23 | postive  |
| IFNG      | MIR155HG   | 0.511864785  | 2.50E-37 | postive  |
| ATM       | MIR155HG   | 0.402570713  | 2.04E-22 | postive  |
| TAZ       | MIR155HG   | 0.420112624  | 1.85E-24 | postive  |
| FBXW7     | MIR155HG   | 0.436400393  | 1.81E-26 | postive  |
| VEGFA     | LINC01126  | 0.466814453  | 1.60E-30 | postive  |
| TUBE1     | LINC01126  | 0.564853187  | 9.40E-47 | postive  |
| ALOX12    | LINC01126  | 0.664867163  | 4.72E-70 | postive  |
| ATM       | LINC01126  | 0.533669232  | 5.26E-41 | postive  |
| TAZ       | LINC01126  | 0.434665122  | 3.00E-26 | postive  |
| FANCD2    | NUP50-DT   | 0.500920776  | 1.40E-35 | postive  |
| ISCU      | NUP50-DT   | 0.455990489  | 4.93E-29 | postive  |
| ASNS      | NUP50-DT   | 0.449070072  | 4.15E-28 | postive  |
| DDIT3     | NUP50-DT   | 0.403135433  | 1.76E-22 | postive  |
| PHKG2     | NUP50-DT   | 0.463935009  | 4.03E-30 | postive  |
| ATG4D     | NUP50-DT   | 0.425612651  | 3.98E-25 | postive  |
| MAPK3     | NUP50-DT   | -0.439220824 | 7.92E-27 | negative |



|           |            |              |          |          |
|-----------|------------|--------------|----------|----------|
| LPIN1     | NUP50-DT   | 0.565111303  | 8.37E-47 | postive  |
| TAZ       | NUP50-DT   | 0.410153019  | 2.76E-23 | postive  |
| GPX4      | PRR34-AS1  | 0.628543298  | 1.34E-60 | postive  |
| HSPB1     | PRR34-AS1  | 0.46920221   | 7.37E-31 | postive  |
| STAT3     | PRR34-AS1  | -0.468534039 | 9.16E-31 | negative |
| RPL8      | PRR34-AS1  | 0.424324476  | 5.72E-25 | postive  |
| MAPK14    | PRR34-AS1  | -0.427544969 | 2.31E-25 | negative |
| SLC2A8    | PRR34-AS1  | 0.401196527  | 2.92E-22 | postive  |
| NRAS      | PRR34-AS1  | -0.403433413 | 1.63E-22 | negative |
| HRAS      | PRR34-AS1  | 0.656310682  | 1.04E-67 | postive  |
| BECN1     | PRR34-AS1  | -0.524815449 | 1.76E-39 | negative |
| MAP1LC3A  | PRR34-AS1  | 0.510604261  | 4.00E-37 | postive  |
| EGLN2     | PRR34-AS1  | 0.53717004   | 1.27E-41 | postive  |
| SIRT1     | PRR34-AS1  | -0.401861874 | 2.46E-22 | negative |
| HELLS     | AC016747.2 | 0.52613398   | 1.05E-39 | postive  |
| ZNF419    | AC016747.2 | 0.493520138  | 1.96E-34 | postive  |
| TUBE1     | AC016747.2 | 0.541412061  | 2.24E-42 | postive  |
| ALOX12    | AC016747.2 | 0.68306592   | 2.63E-75 | postive  |
| GABPB1    | AC016747.2 | 0.444156915  | 1.83E-27 | postive  |
| ATM       | AC016747.2 | 0.567293899  | 3.14E-47 | postive  |
| FBXW7     | AC016747.2 | 0.459904306  | 1.45E-29 | postive  |
| ALOX12    | FIGNL2-DT  | 0.5065689    | 1.78E-36 | postive  |
| TAZ       | FIGNL2-DT  | 0.458262594  | 2.43E-29 | postive  |
| HELLS     | AC116651.1 | 0.451104604  | 2.23E-28 | postive  |
| GABPB1    | AC116651.1 | 0.414125875  | 9.49E-24 | postive  |
| LINC00472 | AC116651.1 | 0.447020833  | 7.73E-28 | postive  |
| ATM       | AC116651.1 | 0.616164347  | 1.17E-57 | postive  |
| IFNG      | AL158071.3 | 0.521537096  | 6.30E-39 | postive  |
| TUBE1     | AL035404.2 | 0.40535337   | 9.86E-23 | postive  |
| ALOX12    | AL035404.2 | 0.477996808  | 4.05E-32 | postive  |
| GABPB1    | AL035404.2 | 0.484937134  | 3.86E-33 | postive  |
| LINC00472 | AL035404.2 | 0.493146741  | 2.23E-34 | postive  |
| ATM       | AL035404.2 | 0.552043295  | 2.56E-44 | postive  |
| FBXW7     | AL035404.2 | 0.43830582   | 1.04E-26 | postive  |
| SP1       | AC226118.1 | 0.447965409  | 5.81E-28 | postive  |
| ATM       | AC024588.1 | 0.40733958   | 5.84E-23 | postive  |
| TFAP2C    | AC002094.4 | 0.578846899  | 1.55E-49 | postive  |
| HBA1      | AC002094.4 | 0.520548311  | 9.23E-39 | postive  |
| DUOX1     | AC002094.4 | 0.420924681  | 1.47E-24 | postive  |
| TXNIP     | USP27X-AS1 | 0.431187404  | 8.17E-26 | postive  |
| CISD1     | IQCH-AS1   | 0.414850234  | 7.80E-24 | postive  |
| FH        | IQCH-AS1   | 0.449191119  | 4.00E-28 | postive  |
| ISCU      | IQCH-AS1   | 0.616712036  | 8.70E-58 | postive  |
| ACSL3     | IQCH-AS1   | 0.416945753  | 4.41E-24 | postive  |
| KLHL24    | IQCH-AS1   | 0.580213227  | 8.13E-50 | postive  |
| GOT1      | IQCH-AS1   | 0.446602504  | 8.77E-28 | postive  |
| ATG4D     | IQCH-AS1   | 0.494439067  | 1.42E-34 | postive  |
| GABARAPL2 | IQCH-AS1   | 0.474597922  | 1.25E-31 | postive  |
| GABARAPL1 | IQCH-AS1   | 0.594453525  | 8.34E-53 | postive  |
| WIP1      | IQCH-AS1   | 0.414206211  | 9.29E-24 | postive  |
| MAPK3     | IQCH-AS1   | -0.456205628 | 4.61E-29 | negative |
| LINC00472 | IQCH-AS1   | 0.53263669   | 7.96E-41 | postive  |
| LPIN1     | IQCH-AS1   | 0.594387285  | 8.62E-53 | postive  |
| TAZ       | ZFAND2A-D  | 0.481773103  | 1.13E-32 | postive  |
| ZNF419    | AL139123.1 | 0.533103088  | 6.60E-41 | postive  |
| TUBE1     | AL139123.1 | 0.512241352  | 2.17E-37 | postive  |
| ALOX12    | AL139123.1 | 0.553411396  | 1.42E-44 | postive  |
| PHKG2     | AL139123.1 | 0.606129993  | 2.28E-55 | postive  |

|           |            |             |           |         |
|-----------|------------|-------------|-----------|---------|
| TAZ       | AL139123.1 | 0.728750308 | 2.31E-90  | postive |
| ZNF419    | AC055855.1 | 0.600641982 | 3.76E-54  | postive |
| VEGFA     | AC055855.1 | 0.503951595 | 4.65E-36  | postive |
| TUBE1     | AC055855.1 | 0.627270699 | 2.72E-60  | postive |
| SETD1B    | AC055855.1 | 0.48837468  | 1.18E-33  | postive |
| ALOX12    | AC055855.1 | 0.611616887 | 1.30E-56  | postive |
| GABPB1    | AC055855.1 | 0.403009803 | 1.82E-22  | postive |
| PHKG2     | AC055855.1 | 0.470652537 | 4.59E-31  | postive |
| ATM       | AC055855.1 | 0.442213646 | 3.27E-27  | postive |
| TAZ       | AC055855.1 | 0.63823939  | 5.33E-63  | postive |
| FBXW7     | AC055855.1 | 0.469444012 | 6.81E-31  | postive |
| PML       | TFAP2E-AS1 | 0.501927732 | 9.71E-36  | postive |
| SLC2A6    | TFAP2E-AS1 | 0.462230122 | 6.93E-30  | postive |
| PHKG2     | TFAP2E-AS1 | 0.430135688 | 1.10E-25  | postive |
| IFNG      | TFAP2E-AS1 | 0.587770661 | 2.20E-51  | postive |
| TAZ       | TFAP2E-AS1 | 0.429739412 | 1.24E-25  | postive |
| HELLS     | AC012404.2 | 0.472442222 | 2.56E-31  | postive |
| KLHL24    | AC012404.2 | 0.442919462 | 2.65E-27  | postive |
| TUBE1     | AC012404.2 | 0.402088609 | 2.31E-22  | postive |
| IREB2     | AC012404.2 | 0.411183759 | 2.10E-23  | postive |
| GABPB1    | AC012404.2 | 0.541896126 | 1.83E-42  | postive |
| PIK3CA    | AC012404.2 | 0.425681662 | 3.91E-25  | postive |
| ATG7      | AC012404.2 | 0.411483594 | 1.93E-23  | postive |
| MAPK8     | AC012404.2 | 0.404909028 | 1.11E-22  | postive |
| LINC00472 | AC012404.2 | 0.845259493 | 2.85E-148 | postive |
| ATM       | AC012404.2 | 0.658832053 | 2.17E-68  | postive |
| FBXW7     | AC012404.2 | 0.412449065 | 1.49E-23  | postive |
| AGPAT3    | LINC01014  | 0.494032502 | 1.63E-34  | postive |
| ACO1      | LINC01014  | 0.435998527 | 2.03E-26  | postive |
| ZNF419    | AC233728.1 | 0.52312554  | 3.40E-39  | postive |
| TUBE1     | AC233728.1 | 0.482118883 | 1.01E-32  | postive |
| SETD1B    | AC233728.1 | 0.449061918 | 4.16E-28  | postive |
| ALOX12    | AC233728.1 | 0.50037813  | 1.70E-35  | postive |
| PHKG2     | AC233728.1 | 0.521821859 | 5.64E-39  | postive |
| TAZ       | AC233728.1 | 0.639349056 | 2.80E-63  | postive |
| TFAP2C    | AC092171.5 | 0.559154584 | 1.17E-45  | postive |
| HBA1      | AC092171.5 | 0.476124036 | 7.56E-32  | postive |
| HELLS     | AF129075.1 | 0.576659023 | 4.30E-49  | postive |
| ZNF419    | AF129075.1 | 0.507597242 | 1.22E-36  | postive |
| TUBE1     | AF129075.1 | 0.610025432 | 3.01E-56  | postive |
| ALOX12    | AF129075.1 | 0.586707534 | 3.68E-51  | postive |
| GABPB1    | AF129075.1 | 0.619175692 | 2.31E-58  | postive |
| MAPK8     | AF129075.1 | 0.488545281 | 1.11E-33  | postive |
| LINC00472 | AF129075.1 | 0.685124834 | 6.32E-76  | postive |
| ATM       | AF129075.1 | 0.725707537 | 2.89E-89  | postive |
| FBXW7     | AF129075.1 | 0.545152735 | 4.72E-43  | postive |
| SLC3A2    | AC011523.1 | 0.452688699 | 1.37E-28  | postive |
| FH        | AC011523.1 | 0.451452783 | 2.00E-28  | postive |
| ISCU      | AC011523.1 | 0.578909563 | 1.50E-49  | postive |
| DDIT3     | AC011523.1 | 0.476514841 | 6.64E-32  | postive |
| KLHL24    | AC011523.1 | 0.440945889 | 4.76E-27  | postive |
| SLC2A8    | AC011523.1 | 0.509768277 | 5.46E-37  | postive |
| GOT1      | AC011523.1 | 0.42640275  | 3.19E-25  | postive |
| ATG4D     | AC011523.1 | 0.590934866 | 4.72E-52  | postive |
| MAP1LC3A  | AC011523.1 | 0.46035264  | 1.26E-29  | postive |
| GABARAPL2 | AC011523.1 | 0.444439329 | 1.68E-27  | postive |
| GABARAPL1 | AC011523.1 | 0.620379265 | 1.20E-58  | postive |
| WIPI2     | AC011523.1 | 0.496031177 | 8.05E-35  | postive |

|           |            |              |           |          |
|-----------|------------|--------------|-----------|----------|
| LPIN1     | AC011523.1 | 0.581801909  | 3.84E-50  | postive  |
| SP1       | AL096799.1 | 0.418345361  | 3.00E-24  | postive  |
| PRKAA2    | AL096799.1 | 0.432826073  | 5.10E-26  | postive  |
| ATM       | AL096799.1 | 0.535560859  | 2.45E-41  | postive  |
| PHKG2     | ELF3-AS1   | 0.560759291  | 5.79E-46  | postive  |
| TAZ       | ELF3-AS1   | 0.558855676  | 1.34E-45  | postive  |
| HELLS     | AC027097.2 | 0.487477025  | 1.61E-33  | postive  |
| TUBE1     | AC027097.2 | 0.45215005   | 1.62E-28  | postive  |
| ALOX12    | AC027097.2 | 0.579555439  | 1.11E-49  | postive  |
| GABPB1    | AC027097.2 | 0.453321091  | 1.13E-28  | postive  |
| ATM       | AC027097.2 | 0.576763821  | 4.09E-49  | postive  |
| FBXW7     | AC027097.2 | 0.43843979   | 9.96E-27  | postive  |
| HELLS     | AL158166.1 | 0.507149047  | 1.44E-36  | postive  |
| GABPB1    | AL158166.1 | 0.455614338  | 5.55E-29  | postive  |
| ATM       | AL158166.1 | 0.531097371  | 1.47E-40  | postive  |
| FBXW7     | AL158166.1 | 0.409706452  | 3.11E-23  | postive  |
| ALOX12    | AL590822.1 | 0.496174601  | 7.65E-35  | postive  |
| ALOX12    | AL662797.1 | 0.407433716  | 5.70E-23  | postive  |
| NCOA4     | AL662797.1 | -0.417564143 | 3.72E-24  | negative |
| PHKG2     | AL662797.1 | 0.60176438   | 2.13E-54  | postive  |
| TAZ       | AL662797.1 | 0.658086488  | 3.46E-68  | postive  |
| CHMP6     | LBX2-AS1   | 0.55871882   | 1.42E-45  | postive  |
| PEBP1     | LBX2-AS1   | 0.449024287  | 4.21E-28  | postive  |
| MIOX      | LBX2-AS1   | 0.433541323  | 4.15E-26  | postive  |
| FANCD2    | AL592494.2 | 0.477427767  | 4.90E-32  | postive  |
| MUC1      | ERVE-1     | 0.401209935  | 2.91E-22  | postive  |
| GABARAPL1 | ERVE-1     | 0.521956349  | 5.36E-39  | postive  |
| LPIN1     | ERVE-1     | 0.515815366  | 5.64E-38  | postive  |
| TFAP2C    | AC108134.4 | 0.565621926  | 6.66E-47  | postive  |
| HBA1      | AC108134.4 | 0.573307768  | 2.03E-48  | postive  |
| DUOX1     | AC108134.4 | 0.40352187   | 1.59E-22  | postive  |
| HSPB1     | AL023803.1 | 0.440193592  | 5.94E-27  | postive  |
| HBA1      | AL023803.1 | 0.619032927  | 2.50E-58  | postive  |
| HRAS      | AL023803.1 | 0.718873572  | 7.45E-87  | postive  |
| MAP1LC3A  | AL023803.1 | 0.442126484  | 3.35E-27  | postive  |
| EGLN2     | AL023803.1 | 0.844829531  | 5.64E-148 | postive  |
| HELLS     | AC010168.2 | 0.458953597  | 1.95E-29  | postive  |
| ZNF419    | AC010168.2 | 0.539647185  | 4.63E-42  | postive  |
| TUBE1     | AC010168.2 | 0.545230628  | 4.57E-43  | postive  |
| ALOX12    | AC010168.2 | 0.594524841  | 8.05E-53  | postive  |
| GABPB1    | AC010168.2 | 0.54019326   | 3.70E-42  | postive  |
| LINC00472 | AC010168.2 | 0.697842934  | 7.28E-80  | postive  |
| ATM       | AC010168.2 | 0.583891423  | 1.42E-50  | postive  |
| FBXW7     | AC010168.2 | 0.452370465  | 1.51E-28  | postive  |
| ZNF419    | NDUFA6-DT  | 0.532258563  | 9.26E-41  | postive  |
| VEGFA     | NDUFA6-DT  | 0.438423967  | 1.00E-26  | postive  |
| TUBE1     | NDUFA6-DT  | 0.571160572  | 5.43E-48  | postive  |
| SETD1B    | NDUFA6-DT  | 0.432583546  | 5.47E-26  | postive  |
| ALOX12    | NDUFA6-DT  | 0.724313515  | 9.10E-89  | postive  |
| GABPB1    | NDUFA6-DT  | 0.419308287  | 2.30E-24  | postive  |
| ATM       | NDUFA6-DT  | 0.538894867  | 6.30E-42  | postive  |
| TAZ       | NDUFA6-DT  | 0.401305538  | 2.84E-22  | postive  |
| FBXW7     | NDUFA6-DT  | 0.408563474  | 4.22E-23  | postive  |
| HELLS     | CKMT2-AS1  | 0.426275007  | 3.30E-25  | postive  |
| ZNF419    | CKMT2-AS1  | 0.476387493  | 6.93E-32  | postive  |
| TUBE1     | CKMT2-AS1  | 0.442157013  | 3.32E-27  | postive  |
| ALOX12    | CKMT2-AS1  | 0.558730841  | 1.41E-45  | postive  |
| GABPB1    | CKMT2-AS1  | 0.407508802  | 5.58E-23  | postive  |

|           |            |             |          |         |
|-----------|------------|-------------|----------|---------|
| MAPK8     | CKMT2-AS1  | 0.410099487 | 2.80E-23 | postive |
| ATM       | CKMT2-AS1  | 0.407342565 | 5.83E-23 | postive |
| TUBE1     | AC112484.1 | 0.407899922 | 5.03E-23 | postive |
| SETD1B    | AC112484.1 | 0.402070591 | 2.33E-22 | postive |
| ALOX12    | AC112484.1 | 0.484755937 | 4.11E-33 | postive |
| TAZ       | AC112484.1 | 0.465076852 | 2.79E-30 | postive |
| HELLS     | AC129510.1 | 0.405598982 | 9.24E-23 | postive |
| ZNF419    | AC129510.1 | 0.490154964 | 6.36E-34 | postive |
| VEGFA     | AC129510.1 | 0.463374225 | 4.82E-30 | postive |
| TUBE1     | AC129510.1 | 0.646085812 | 5.27E-65 | postive |
| SETD1B    | AC129510.1 | 0.510967511 | 3.49E-37 | postive |
| DRD4      | AC129510.1 | 0.433556666 | 4.13E-26 | postive |
| ALOX12    | AC129510.1 | 0.683049228 | 2.66E-75 | postive |
| PHKG2     | AC129510.1 | 0.532933013 | 7.07E-41 | postive |
| ATM       | AC129510.1 | 0.416461818 | 5.03E-24 | postive |
| TAZ       | AC129510.1 | 0.653170362 | 7.25E-67 | postive |
| FBXW7     | AC129510.1 | 0.403449375 | 1.62E-22 | postive |
| TMBIM4    | UBR5-AS1   | 0.467207913 | 1.41E-30 | postive |
| KLHL24    | UBR5-AS1   | 0.420208646 | 1.80E-24 | postive |
| TUBE1     | UBR5-AS1   | 0.411439972 | 1.96E-23 | postive |
| HMGB1     | UBR5-AS1   | 0.428474285 | 1.77E-25 | postive |
| GABPB1    | UBR5-AS1   | 0.450600551 | 2.60E-28 | postive |
| EMC2      | UBR5-AS1   | 0.475278339 | 1.00E-31 | postive |
| ACSL4     | UBR5-AS1   | 0.409843923 | 3.00E-23 | postive |
| KRAS      | UBR5-AS1   | 0.452833873 | 1.31E-28 | postive |
| LINC00472 | UBR5-AS1   | 0.437634927 | 1.26E-26 | postive |
| PRKAA1    | UBR5-AS1   | 0.414874476 | 7.75E-24 | postive |
| MTOR      | AC124312.2 | 0.493797324 | 1.77E-34 | postive |
| OXSR1     | AC124312.2 | 0.44377681  | 2.05E-27 | postive |
| KLHL24    | AC124312.2 | 0.586957948 | 3.26E-51 | postive |
| TUBE1     | AC124312.2 | 0.426371784 | 3.22E-25 | postive |
| MAP3K5    | AC124312.2 | 0.438709793 | 9.20E-27 | postive |
| IREB2     | AC124312.2 | 0.687622716 | 1.11E-76 | postive |
| SP1       | AC124312.2 | 0.404612224 | 1.20E-22 | postive |
| GABPB1    | AC124312.2 | 0.497712184 | 4.42E-35 | postive |
| PIK3CA    | AC124312.2 | 0.622321384 | 4.17E-59 | postive |
| KRAS      | AC124312.2 | 0.490163623 | 6.34E-34 | postive |
| SLC38A1   | AC124312.2 | 0.405476201 | 9.55E-23 | postive |
| ZEB1      | AC124312.2 | 0.426762365 | 2.88E-25 | postive |
| MAPK8     | AC124312.2 | 0.601237282 | 2.78E-54 | postive |
| LINC00472 | AC124312.2 | 0.709707144 | 9.91E-84 | postive |
| PRKAA2    | AC124312.2 | 0.562064056 | 3.25E-46 | postive |
| PRKAA1    | AC124312.2 | 0.55814134  | 1.83E-45 | postive |
| TLR4      | AC124312.2 | 0.401222599 | 2.90E-22 | postive |
| ATM       | AC124312.2 | 0.688150316 | 7.63E-77 | postive |
| FBXW7     | AC124312.2 | 0.438911005 | 8.67E-27 | postive |
| HELLS     | AC105105.3 | 0.516257039 | 4.77E-38 | postive |
| ALOX12    | AC105105.3 | 0.515955631 | 5.34E-38 | postive |
| ATM       | AC105105.3 | 0.55102285  | 3.95E-44 | postive |
| HELLS     | LINC00390  | 0.474632597 | 1.24E-31 | postive |
| TUBE1     | LINC00390  | 0.405570622 | 9.31E-23 | postive |
| ALOX12    | LINC00390  | 0.406060385 | 8.19E-23 | postive |
| GABPB1    | LINC00390  | 0.413907209 | 1.01E-23 | postive |
| LINC00472 | LINC00390  | 0.411643388 | 1.85E-23 | postive |
| ATM       | LINC00390  | 0.651249636 | 2.34E-66 | postive |
| HELLS     | AC010531.3 | 0.437997019 | 1.13E-26 | postive |
| ZNF419    | AC010531.3 | 0.411134702 | 2.12E-23 | postive |
| TUBE1     | AC010531.3 | 0.446668275 | 8.60E-28 | postive |

|           |            |              |          |          |
|-----------|------------|--------------|----------|----------|
| ALOX12    | AC010531.3 | 0.566898291  | 3.75E-47 | postive  |
| ATM       | AC010531.3 | 0.438834993  | 8.87E-27 | postive  |
| FBXW7     | AC010531.3 | 0.408933971  | 3.82E-23 | postive  |
| ALOX12    | HLA-DQB1-1 | 0.434408366  | 3.23E-26 | postive  |
| ATM       | HLA-DQB1-1 | 0.416513452  | 4.96E-24 | postive  |
| ZNF419    | ZEB2-AS1   | 0.41405134   | 9.68E-24 | postive  |
| VEGFA     | ZEB2-AS1   | 0.424852075  | 4.93E-25 | postive  |
| TUBE1     | ZEB2-AS1   | 0.514523161  | 9.19E-38 | postive  |
| ALOX12    | ZEB2-AS1   | 0.578488427  | 1.83E-49 | postive  |
| ATM       | ZEB2-AS1   | 0.424910945  | 4.85E-25 | postive  |
| TAZ       | ZEB2-AS1   | 0.576085416  | 5.61E-49 | postive  |
| HSPB1     | AC093673.1 | 0.458000402  | 2.63E-29 | postive  |
| IREB2     | AC093673.1 | -0.421845212 | 1.14E-24 | negative |
| SLC1A5    | AC093673.1 | 0.474627163  | 1.24E-31 | postive  |
| NCOA4     | AC093673.1 | -0.423666228 | 6.87E-25 | negative |
| PRKAA2    | AC093673.1 | -0.43270531  | 5.28E-26 | negative |
| HELLS     | AC016722.2 | 0.51538334   | 6.64E-38 | postive  |
| ZNF419    | AC016722.2 | 0.526834663  | 7.98E-40 | postive  |
| TUBE1     | AC016722.2 | 0.578574148  | 1.76E-49 | postive  |
| ALOX12    | AC016722.2 | 0.670731931  | 1.05E-71 | postive  |
| GABPB1    | AC016722.2 | 0.512567828  | 1.92E-37 | postive  |
| MAPK8     | AC016722.2 | 0.45908839   | 1.87E-29 | postive  |
| LINC00472 | AC016722.2 | 0.517782105  | 2.67E-38 | postive  |
| ATM       | AC016722.2 | 0.615559842  | 1.61E-57 | postive  |
| FBXW7     | AC016722.2 | 0.520955531  | 7.89E-39 | postive  |
| VEGFA     | ATXN1-AS1  | 0.455465978  | 5.81E-29 | postive  |
| TUBE1     | ATXN1-AS1  | 0.402230713  | 2.23E-22 | postive  |
| SETD1B    | ATXN1-AS1  | 0.40916403   | 3.60E-23 | postive  |
| ALOX12    | ATXN1-AS1  | 0.419929692  | 1.94E-24 | postive  |
| HELLS     | AC017083.1 | 0.409010372  | 3.75E-23 | postive  |
| ZNF419    | AC017083.1 | 0.509241313  | 6.64E-37 | postive  |
| TUBE1     | AC017083.1 | 0.526152908  | 1.04E-39 | postive  |
| DRD4      | AC017083.1 | 0.406047518  | 8.21E-23 | postive  |
| ALOX12    | AC017083.1 | 0.591424209  | 3.71E-52 | postive  |
| PHKG2     | AC017083.1 | 0.559724104  | 9.13E-46 | postive  |
| TAZ       | AC017083.1 | 0.703138917  | 1.45E-81 | postive  |
| ZNF419    | LINC02352  | 0.413149036  | 1.24E-23 | postive  |
| PHKG2     | LINC02352  | 0.586807915  | 3.50E-51 | postive  |
| TAZ       | LINC02352  | 0.508685659  | 8.16E-37 | postive  |
| BRD4      | PRKCZ-AS1  | 0.448739407  | 4.59E-28 | postive  |
| ZNF419    | PRKCZ-AS1  | 0.453619553  | 1.03E-28 | postive  |
| VEGFA     | PRKCZ-AS1  | 0.538846078  | 6.42E-42 | postive  |
| TUBE1     | PRKCZ-AS1  | 0.422308859  | 1.00E-24 | postive  |
| SETD1B    | PRKCZ-AS1  | 0.545967783  | 3.36E-43 | postive  |
| ALOX12    | PRKCZ-AS1  | 0.537681795  | 1.03E-41 | postive  |
| TAZ       | PRKCZ-AS1  | 0.544656198  | 5.81E-43 | postive  |
| HELLS     | AP000692.1 | 0.426013238  | 3.56E-25 | postive  |
| ZNF419    | AP000692.1 | 0.589467342  | 9.65E-52 | postive  |
| VEGFA     | AP000692.1 | 0.413943469  | 9.97E-24 | postive  |
| TUBE1     | AP000692.1 | 0.594408531  | 8.53E-53 | postive  |
| SETD1B    | AP000692.1 | 0.409475975  | 3.31E-23 | postive  |
| ALOX12    | AP000692.1 | 0.614352553  | 3.07E-57 | postive  |
| GABPB1    | AP000692.1 | 0.52661918   | 8.69E-40 | postive  |
| LINC00472 | AP000692.1 | 0.57626211   | 5.17E-49 | postive  |
| ATM       | AP000692.1 | 0.578219426  | 2.07E-49 | postive  |
| FBXW7     | AP000692.1 | 0.562666365  | 2.49E-46 | postive  |
| ENPP2     | AC074286.1 | 0.401623313  | 2.61E-22 | postive  |
| GABPB1    | AC074286.1 | 0.420676582  | 1.58E-24 | postive  |

|           |            |             |           |         |
|-----------|------------|-------------|-----------|---------|
| MAPK8     | AC074286.1 | 0.432088698 | 6.31E-26  | postive |
| ATM       | AC074286.1 | 0.568592253 | 1.75E-47  | postive |
| FBXW7     | AC074286.1 | 0.430849525 | 9.00E-26  | postive |
| HELLS     | AC006059.1 | 0.458246595 | 2.44E-29  | postive |
| KLHL24    | AC006059.1 | 0.550883084 | 4.20E-44  | postive |
| IREB2     | AC006059.1 | 0.452456458 | 1.47E-28  | postive |
| GABPB1    | AC006059.1 | 0.561000928 | 5.20E-46  | postive |
| PIK3CA    | AC006059.1 | 0.498762184 | 3.04E-35  | postive |
| ATG7      | AC006059.1 | 0.503098784 | 6.34E-36  | postive |
| LINC00472 | AC006059.1 | 0.850409352 | 6.76E-152 | postive |
| TGFB1     | AC006059.1 | 0.446587117 | 8.81E-28  | postive |
| LPIN1     | AC006059.1 | 0.432408097 | 5.76E-26  | postive |
| ATM       | AC006059.1 | 0.641292467 | 8.99E-64  | postive |
| FBXW7     | AC006059.1 | 0.445738973 | 1.14E-27  | postive |
| GOT1      | AL162377.1 | 0.441445522 | 4.10E-27  | postive |
| ATG4D     | AL162377.1 | 0.453956454 | 9.27E-29  | postive |
| ALOX12    | AL603839.3 | 0.411323483 | 2.02E-23  | postive |
| TFAP2C    | AL603839.3 | 0.451449666 | 2.01E-28  | postive |
| HBA1      | AL603839.3 | 0.448263006 | 5.30E-28  | postive |
| TFAP2C    | AL109976.1 | 0.485982521 | 2.70E-33  | postive |
| LPIN1     | AL109976.1 | 0.467090433 | 1.46E-30  | postive |
| TFAP2C    | HNF4A-AS1  | 0.459743637 | 1.52E-29  | postive |
| HBA1      | HNF4A-AS1  | 0.417948461 | 3.35E-24  | postive |
| TUBE1     | AC011444.1 | 0.47375394  | 1.66E-31  | postive |
| ALOX12    | AC011444.1 | 0.461173848 | 9.69E-30  | postive |
| TAZ       | AC011444.1 | 0.443046634 | 2.55E-27  | postive |
| IL6       | AC015819.2 | 0.509168831 | 6.82E-37  | postive |
| HELLS     | AC012409.1 | 0.471283289 | 3.74E-31  | postive |
| TUBE1     | AC012409.1 | 0.4686568   | 8.80E-31  | postive |
| ALOX12    | AC012409.1 | 0.502966324 | 6.66E-36  | postive |
| GABPB1    | AC012409.1 | 0.473468882 | 1.82E-31  | postive |
| LINC00472 | AC012409.1 | 0.594418313 | 8.49E-53  | postive |
| ATM       | AC012409.1 | 0.660087175 | 9.85E-69  | postive |
| TUBE1     | MRPS30-DT  | 0.54078259  | 2.90E-42  | postive |
| IREB2     | MRPS30-DT  | 0.41042524  | 2.57E-23  | postive |
| GABPB1    | MRPS30-DT  | 0.499184223 | 2.61E-35  | postive |
| MAPK8     | MRPS30-DT  | 0.491250994 | 4.34E-34  | postive |
| LINC00472 | MRPS30-DT  | 0.434454779 | 3.19E-26  | postive |
| PRKAA2    | MRPS30-DT  | 0.468494798 | 9.27E-31  | postive |
| PRKAA1    | MRPS30-DT  | 0.47609825  | 7.63E-32  | postive |
| ATM       | MRPS30-DT  | 0.659473117 | 1.45E-68  | postive |
| FBXW7     | MRPS30-DT  | 0.415699868 | 6.19E-24  | postive |
| HELLS     | TH2LCRR    | 0.549300346 | 8.23E-44  | postive |
| ZNF419    | TH2LCRR    | 0.408411267 | 4.39E-23  | postive |
| KLHL24    | TH2LCRR    | 0.417113634 | 4.21E-24  | postive |
| TUBE1     | TH2LCRR    | 0.513113282 | 1.56E-37  | postive |
| ALOX12    | TH2LCRR    | 0.501411534 | 1.17E-35  | postive |
| GABPB1    | TH2LCRR    | 0.582199575 | 3.18E-50  | postive |
| ATG7      | TH2LCRR    | 0.403485666 | 1.61E-22  | postive |
| MAPK8     | TH2LCRR    | 0.415499849 | 6.54E-24  | postive |
| LINC00472 | TH2LCRR    | 0.78734929  | 6.87E-115 | postive |
| ATM       | TH2LCRR    | 0.726514003 | 1.49E-89  | postive |
| FBXW7     | TH2LCRR    | 0.496532581 | 6.73E-35  | postive |
| TRIB3     | AC133644.1 | 0.421952862 | 1.11E-24  | postive |
| HELLS     | AL132656.2 | 0.564210021 | 1.25E-46  | postive |
| ZNF419    | AL132656.2 | 0.401144169 | 2.96E-22  | postive |
| TUBE1     | AL132656.2 | 0.611461077 | 1.41E-56  | postive |
| ALOX12    | AL132656.2 | 0.488060175 | 1.32E-33  | postive |

|           |            |              |          |          |
|-----------|------------|--------------|----------|----------|
| GABPB1    | AL132656.2 | 0.521696042  | 5.93E-39 | postive  |
| ATM       | AL132656.2 | 0.510683068  | 3.88E-37 | postive  |
| FBXW7     | AL132656.2 | 0.479836469  | 2.18E-32 | postive  |
| IFNG      | AC006369.1 | 0.465778227  | 2.23E-30 | postive  |
| LINC00472 | AC108058.1 | 0.41612665   | 5.51E-24 | postive  |
| NCOA4     | U47924.3   | -0.405246491 | 1.01E-22 | negative |
| PHKG2     | U47924.3   | 0.67668311   | 2.02E-73 | postive  |
| TAZ       | U47924.3   | 0.691932457  | 5.23E-78 | postive  |
| GPX4      | AP002360.1 | 0.401550169  | 2.66E-22 | postive  |
| OTUB1     | AP002360.1 | 0.417000079  | 4.34E-24 | postive  |
| SLC2A8    | AP002360.1 | 0.403064569  | 1.80E-22 | postive  |
| RIPK1     | AP002360.1 | -0.400753504 | 3.27E-22 | negative |
| HRAS      | AP002360.1 | 0.483297877  | 6.76E-33 | postive  |
| ATG4D     | AP002360.1 | 0.442616449  | 2.90E-27 | postive  |
| MAP1LC3A  | AP002360.1 | 0.46692364   | 1.54E-30 | postive  |
| EGLN2     | AP002360.1 | 0.422869893  | 8.59E-25 | postive  |
| SLC3A2    | LINC01612  | 0.460836862  | 1.08E-29 | postive  |
| FH        | LINC01612  | 0.523365902  | 3.10E-39 | postive  |
| ISCU      | LINC01612  | 0.59636475   | 3.23E-53 | postive  |
| DDIT3     | LINC01612  | 0.468240853  | 1.01E-30 | postive  |
| GOT1      | LINC01612  | 0.500004906  | 1.94E-35 | postive  |
| ATG4D     | LINC01612  | 0.545857019  | 3.52E-43 | postive  |
| GABARAPL2 | LINC01612  | 0.5571432    | 2.82E-45 | postive  |
| GABARAPL1 | LINC01612  | 0.693278809  | 1.99E-78 | postive  |
| LPIN1     | LINC01612  | 0.458467493  | 2.27E-29 | postive  |
| HIC1      | SLC25A34-A | 0.427974393  | 2.04E-25 | postive  |
| ZNF419    | AP001029.1 | 0.418747592  | 2.69E-24 | postive  |
| ALOX12    | AP001029.1 | 0.509972735  | 5.06E-37 | postive  |
| PHKG2     | AP001029.1 | 0.424727117  | 5.11E-25 | postive  |
| TAZ       | AP001029.1 | 0.520707415  | 8.68E-39 | postive  |
| HBA1      | AC135178.6 | 0.476089216  | 7.65E-32 | postive  |
| NCOA4     | AC135178.6 | -0.453746225 | 9.90E-29 | negative |
| PHKG2     | AC135178.6 | 0.43436943   | 3.27E-26 | postive  |
| EGLN2     | AC135178.6 | 0.403408226  | 1.64E-22 | postive  |
| TAZ       | AC135178.6 | 0.438387875  | 1.01E-26 | postive  |
| FANCD2    | AC127024.4 | 0.417321835  | 3.98E-24 | postive  |
| HELLS     | AC127024.4 | 0.597244988  | 2.08E-53 | postive  |
| ZNF419    | AC127024.4 | 0.519140889  | 1.59E-38 | postive  |
| TUBE1     | AC127024.4 | 0.5548416    | 7.67E-45 | postive  |
| ALOX12    | AC127024.4 | 0.655951134  | 1.30E-67 | postive  |
| GABPB1    | AC127024.4 | 0.548693269  | 1.06E-43 | postive  |
| LINC00472 | AC127024.4 | 0.577196103  | 3.35E-49 | postive  |
| ATM       | AC127024.4 | 0.625876305  | 5.90E-60 | postive  |
| FBXW7     | AC127024.4 | 0.519086712  | 1.62E-38 | postive  |
| VEGFA     | LINC01144  | 0.448159562  | 5.47E-28 | postive  |
| ALOX12    | LINC01144  | 0.435067191  | 2.67E-26 | postive  |
| TAZ       | LINC01144  | 0.46047883   | 1.21E-29 | postive  |
| DRD4      | AC009133.1 | 0.416755746  | 4.64E-24 | postive  |
| ALOX12    | AC009133.1 | 0.563350544  | 1.84E-46 | postive  |
| PHKG2     | AC009133.1 | 0.582382127  | 2.91E-50 | postive  |
| TAZ       | AC009133.1 | 0.643764153  | 2.10E-64 | postive  |
| MUC1      | AC005082.1 | 0.459835143  | 1.48E-29 | postive  |
| ZNF419    | AC020558.2 | 0.431362421  | 7.77E-26 | postive  |
| VEGFA     | AC020558.2 | 0.44266404   | 2.86E-27 | postive  |
| SETD1B    | AC020558.2 | 0.454194274  | 8.62E-29 | postive  |
| ALOX12    | AC020558.2 | 0.490756097  | 5.16E-34 | postive  |
| TAZ       | AC020558.2 | 0.558336462  | 1.68E-45 | postive  |
| ANGPTL7   | ARHGAP5-A  | 0.442287297  | 3.19E-27 | postive  |

|           |            |              |          |          |
|-----------|------------|--------------|----------|----------|
| EIF2S1    | ARHGAP5-A  | 0.4226828    | 9.05E-25 | postive  |
| FANCD2    | AC080038.1 | 0.525148487  | 1.55E-39 | postive  |
| AURKA     | AC080038.1 | 0.401877968  | 2.45E-22 | postive  |
| G6PD      | AC080038.1 | 0.408567018  | 4.22E-23 | postive  |
| CDKN2A    | AC080038.1 | 0.431887392  | 6.69E-26 | postive  |
| FANCD2    | AP000873.3 | 0.402540459  | 2.06E-22 | postive  |
| HELLS     | AP000873.3 | 0.440416847  | 5.56E-27 | postive  |
| ZNF419    | AP000873.3 | 0.429064561  | 1.50E-25 | postive  |
| TUBE1     | AP000873.3 | 0.429798394  | 1.22E-25 | postive  |
| ALOX12    | AP000873.3 | 0.566577831  | 4.34E-47 | postive  |
| TFAP2C    | AP000873.3 | 0.442063238  | 3.41E-27 | postive  |
| HBA1      | AP000873.3 | 0.421087872  | 1.41E-24 | postive  |
| DUOX1     | AP000873.3 | 0.41724588   | 4.06E-24 | postive  |
| FBXW7     | AP000873.3 | 0.412792949  | 1.36E-23 | postive  |
| TAZ       | AC136475.3 | 0.418768936  | 2.67E-24 | postive  |
| LINC00472 | AC119424.1 | 0.560512931  | 6.45E-46 | postive  |
| ATM       | AC119424.1 | 0.429165459  | 1.46E-25 | postive  |
| MUC1      | AC104072.1 | 0.493046353  | 2.31E-34 | postive  |
| SLC2A1    | AC104072.1 | 0.421582609  | 1.23E-24 | postive  |
| TAZ       | TOLLIP-AS1 | 0.422907378  | 8.50E-25 | postive  |
| SLC3A2    | LINC01802  | 0.429753939  | 1.23E-25 | postive  |
| FH        | LINC01802  | 0.440398118  | 5.59E-27 | postive  |
| ISCU      | LINC01802  | 0.575003399  | 9.27E-49 | postive  |
| SLC2A8    | LINC01802  | 0.436108955  | 1.97E-26 | postive  |
| CS        | LINC01802  | 0.445701008  | 1.15E-27 | postive  |
| ATG4D     | LINC01802  | 0.562395792  | 2.81E-46 | postive  |
| GABARAPL1 | LINC01802  | 0.632634276  | 1.33E-61 | postive  |
| LPIN1     | LINC01802  | 0.558334704  | 1.68E-45 | postive  |
| IREB2     | AC008555.1 | 0.403332582  | 1.67E-22 | postive  |
| SP1       | AC008555.1 | 0.511656672  | 2.70E-37 | postive  |
| ZEB1      | AC008555.1 | 0.430204999  | 1.08E-25 | postive  |
| PRKAA2    | AC008555.1 | 0.415792088  | 6.04E-24 | postive  |
| EPAS1     | AC008555.1 | 0.465865881  | 2.17E-30 | postive  |
| SIRT1     | AC008555.1 | 0.552355451  | 2.24E-44 | postive  |
| AKR1C2    | AL033397.1 | 0.634019834  | 6.05E-62 | postive  |
| AKR1C3    | AL033397.1 | 0.468272292  | 9.97E-31 | postive  |
| NQO1      | AL033397.1 | 0.59582928   | 4.21E-53 | postive  |
| TXNRD1    | AL033397.1 | 0.461848707  | 7.82E-30 | postive  |
| SRXN1     | AL033397.1 | 0.415461479  | 6.61E-24 | postive  |
| HELLS     | AL353600.1 | 0.497279873  | 5.16E-35 | postive  |
| TUBE1     | AL353600.1 | 0.414757521  | 8.00E-24 | postive  |
| ALOX12    | AL353600.1 | 0.400333444  | 3.65E-22 | postive  |
| GABPB1    | AL353600.1 | 0.447182635  | 7.36E-28 | postive  |
| ATM       | AL353600.1 | 0.561580891  | 4.03E-46 | postive  |
| FBXW7     | AL353600.1 | 0.459117656  | 1.85E-29 | postive  |
| TFAP2C    | AC008050.1 | 0.444381518  | 1.71E-27 | postive  |
| HBA1      | AC008050.1 | 0.430395599  | 1.03E-25 | postive  |
| GPX4      | AC108673.3 | 0.411209776  | 2.08E-23 | postive  |
| HSPB1     | AC108673.3 | 0.465394025  | 2.52E-30 | postive  |
| HSF1      | AC108673.3 | 0.447563592  | 6.56E-28 | postive  |
| LAMP2     | AC108673.3 | -0.418103867 | 3.21E-24 | negative |
| EIF2S1    | AC108673.3 | -0.421890359 | 1.13E-24 | negative |
| MAPK14    | AC108673.3 | -0.40553153  | 9.41E-23 | negative |
| EIF2AK4   | AC108673.3 | -0.409534677 | 3.26E-23 | negative |
| IREB2     | AC108673.3 | -0.4443217   | 1.74E-27 | negative |
| NOX1      | AC108673.3 | 0.474789959  | 1.18E-31 | postive  |
| PIK3CA    | AC108673.3 | -0.422543204 | 9.40E-25 | negative |
| NRAS      | AC108673.3 | -0.462515712 | 6.33E-30 | negative |



|           |            |              |           |          |
|-----------|------------|--------------|-----------|----------|
| HRAS      | AC108673.3 | 0.493638826  | 1.88E-34  | postive  |
| NCOA4     | AC108673.3 | -0.564284369 | 1.21E-46  | negative |
| PHKG2     | AC108673.3 | 0.64326115   | 2.82E-64  | postive  |
| BECN1     | AC108673.3 | -0.530478107 | 1.89E-40  | negative |
| MAPK1     | AC108673.3 | -0.496921493 | 5.86E-35  | negative |
| ANO6      | AC108673.3 | -0.405153325 | 1.04E-22  | negative |
| TAZ       | AC108673.3 | 0.557520522  | 2.40E-45  | postive  |
| MTDH      | AC108673.3 | -0.459027372 | 1.91E-29  | negative |
| SIRT1     | AC108673.3 | -0.418983716 | 2.52E-24  | negative |
| TUBE1     | AC084782.3 | 0.495666701  | 9.16E-35  | postive  |
| ATM       | AC084782.3 | 0.44811899   | 5.54E-28  | postive  |
| HELLS     | AC118344.1 | 0.416673079  | 4.75E-24  | postive  |
| ZNF419    | AC118344.1 | 0.535797045  | 2.23E-41  | postive  |
| KLHL24    | AC118344.1 | 0.498600332  | 3.22E-35  | postive  |
| TUBE1     | AC118344.1 | 0.502994486  | 6.59E-36  | postive  |
| SETD1B    | AC118344.1 | 0.443262881  | 2.39E-27  | postive  |
| ALOX12    | AC118344.1 | 0.574047894  | 1.44E-48  | postive  |
| IREB2     | AC118344.1 | 0.470271353  | 5.20E-31  | postive  |
| GABPB1    | AC118344.1 | 0.53917797   | 5.61E-42  | postive  |
| PIK3CA    | AC118344.1 | 0.436277979  | 1.88E-26  | postive  |
| MAPK8     | AC118344.1 | 0.488183572  | 1.26E-33  | postive  |
| LINC00472 | AC118344.1 | 0.771936643  | 9.88E-108 | postive  |
| LPIN1     | AC118344.1 | 0.4140606    | 9.66E-24  | postive  |
| ATM       | AC118344.1 | 0.62675824   | 3.61E-60  | postive  |
| FBXW7     | AC118344.1 | 0.463174949  | 5.13E-30  | postive  |
| HELLS     | DCUN1D2-A  | 0.450584308  | 2.62E-28  | postive  |
| ZNF419    | DCUN1D2-A  | 0.447180886  | 7.36E-28  | postive  |
| VEGFA     | DCUN1D2-A  | 0.424158057  | 5.99E-25  | postive  |
| TUBE1     | DCUN1D2-A  | 0.541225671  | 2.41E-42  | postive  |
| SETD1B    | DCUN1D2-A  | 0.438850032  | 8.83E-27  | postive  |
| ALOX12    | DCUN1D2-A  | 0.599943358  | 5.36E-54  | postive  |
| GABPB1    | DCUN1D2-A  | 0.46839739   | 9.57E-31  | postive  |
| MAPK8     | DCUN1D2-A  | 0.409791426  | 3.04E-23  | postive  |
| ATM       | DCUN1D2-A  | 0.641175043  | 9.63E-64  | postive  |
| FBXW7     | DCUN1D2-A  | 0.526852343  | 7.93E-40  | postive  |
| TFAP2C    | AC120498.3 | 0.554463701  | 9.03E-45  | postive  |
| ISCU      | AC106791.1 | 0.40334112   | 1.67E-22  | postive  |
| KLHL24    | AC106791.1 | 0.504188406  | 4.27E-36  | postive  |
| MAP3K5    | AC106791.1 | 0.431183075  | 8.18E-26  | postive  |
| IREB2     | AC106791.1 | 0.434515429  | 3.13E-26  | postive  |
| GABPB1    | AC106791.1 | 0.404843011  | 1.13E-22  | postive  |
| PIK3CA    | AC106791.1 | 0.429709696  | 1.25E-25  | postive  |
| ATG7      | AC106791.1 | 0.409936912  | 2.93E-23  | postive  |
| LINC00472 | AC106791.1 | 0.650726139  | 3.22E-66  | postive  |
| LPIN1     | AC106791.1 | 0.519492053  | 1.39E-38  | postive  |
| ATM       | AC106791.1 | 0.507431638  | 1.30E-36  | postive  |
| HELLS     | AC073534.2 | 0.540206307  | 3.68E-42  | postive  |
| ALOX12    | AC073534.2 | 0.403052942  | 1.80E-22  | postive  |
| GABPB1    | AC073534.2 | 0.477859068  | 4.24E-32  | postive  |
| LINC00472 | AC073534.2 | 0.559386899  | 1.06E-45  | postive  |
| ATM       | AC073534.2 | 0.504803626  | 3.41E-36  | postive  |
| FBXW7     | AC073534.2 | 0.445395863  | 1.26E-27  | postive  |
| BNIP3     | LINC02188  | 0.424535883  | 5.39E-25  | postive  |
| HNF4A     | LINC02188  | 0.45724467   | 3.34E-29  | postive  |
| ALOX12    | AL357079.1 | 0.421478695  | 1.26E-24  | postive  |
| TAZ       | AL357079.1 | 0.413352597  | 1.17E-23  | postive  |
| CYBB      | LINC01150  | 0.475236242  | 1.02E-31  | postive  |
| HELLS     | AP000350.6 | 0.457079717  | 3.51E-29  | postive  |

|           |            |             |          |         |
|-----------|------------|-------------|----------|---------|
| TUBE1     | AP000350.6 | 0.532791377 | 7.48E-41 | postive |
| ALOX12    | AP000350.6 | 0.544056265 | 7.46E-43 | postive |
| IREB2     | AP000350.6 | 0.433268831 | 4.49E-26 | postive |
| GABPB1    | AP000350.6 | 0.493502509 | 1.97E-34 | postive |
| MAPK8     | AP000350.6 | 0.451340147 | 2.08E-28 | postive |
| LINC00472 | AP000350.6 | 0.614781586 | 2.44E-57 | postive |
| ATM       | AP000350.6 | 0.707199396 | 6.75E-83 | postive |
| FBXW7     | AP000350.6 | 0.439001712 | 8.45E-27 | postive |
| HELLS     | AL450998.2 | 0.581525582 | 4.37E-50 | postive |
| ZNF419    | AL450998.2 | 0.517475989 | 3.00E-38 | postive |
| TUBE1     | AL450998.2 | 0.564790642 | 9.66E-47 | postive |
| SETD1B    | AL450998.2 | 0.406162478 | 7.97E-23 | postive |
| ALOX12    | AL450998.2 | 0.716729961 | 4.11E-86 | postive |
| GABPB1    | AL450998.2 | 0.533336688 | 6.01E-41 | postive |
| LINC00472 | AL450998.2 | 0.481996812 | 1.05E-32 | postive |
| ATM       | AL450998.2 | 0.694661856 | 7.36E-79 | postive |
| FBXW7     | AL450998.2 | 0.546980823 | 2.19E-43 | postive |
| ZNF419    | HCG27      | 0.485175664 | 3.56E-33 | postive |
| VEGFA     | HCG27      | 0.52153829  | 6.30E-39 | postive |
| TUBE1     | HCG27      | 0.672922589 | 2.48E-72 | postive |
| ALOX12    | HCG27      | 0.705572309 | 2.32E-82 | postive |
| ATM       | HCG27      | 0.462848213 | 5.69E-30 | postive |
| TAZ       | HCG27      | 0.58750266  | 2.50E-51 | postive |
| HELLS     | SCAANT1    | 0.492190575 | 3.12E-34 | postive |
| TUBE1     | SCAANT1    | 0.404998504 | 1.08E-22 | postive |
| ALOX12    | SCAANT1    | 0.416797056 | 4.59E-24 | postive |
| GABPB1    | SCAANT1    | 0.449069936 | 4.15E-28 | postive |
| LINC00472 | SCAANT1    | 0.505214377 | 2.93E-36 | postive |
| ATM       | SCAANT1    | 0.503063091 | 6.43E-36 | postive |
| FBXW7     | SCAANT1    | 0.406524548 | 7.24E-23 | postive |
| TFAP2C    | AC012485.2 | 0.477197584 | 5.29E-32 | postive |
| HBA1      | AC012485.2 | 0.436517838 | 1.75E-26 | postive |
| HBA1      | LINC02723  | 0.432934966 | 4.94E-26 | postive |
| HELLS     | LAMC1-AS1  | 0.469565427 | 6.55E-31 | postive |
| ZNF419    | LAMC1-AS1  | 0.468103353 | 1.05E-30 | postive |
| VEGFA     | LAMC1-AS1  | 0.435653879 | 2.25E-26 | postive |
| TUBE1     | LAMC1-AS1  | 0.566705708 | 4.09E-47 | postive |
| SETD1B    | LAMC1-AS1  | 0.423508949 | 7.18E-25 | postive |
| ALOX12    | LAMC1-AS1  | 0.573901953 | 1.54E-48 | postive |
| GABPB1    | LAMC1-AS1  | 0.495696045 | 9.07E-35 | postive |
| MAPK8     | LAMC1-AS1  | 0.407799989 | 5.17E-23 | postive |
| ATM       | LAMC1-AS1  | 0.616437062 | 1.01E-57 | postive |
| FBXW7     | LAMC1-AS1  | 0.523396086 | 3.06E-39 | postive |
| VEGFA     | AC136475.2 | 0.548721438 | 1.05E-43 | postive |
| ALOX12    | AC136475.2 | 0.505077045 | 3.08E-36 | postive |
| TAZ       | AC136475.2 | 0.552939175 | 1.74E-44 | postive |
| VEGFA     | AC064875.1 | 0.412256235 | 1.57E-23 | postive |
| ZEB1      | AC064875.1 | 0.536393819 | 1.75E-41 | postive |
| MAPK8     | AC064875.1 | 0.415850227 | 5.94E-24 | postive |
| EPAS1     | AC064875.1 | 0.481404125 | 1.29E-32 | postive |
| ZNF419    | AL355297.2 | 0.435614324 | 2.28E-26 | postive |
| TUBE1     | AL355297.2 | 0.533626402 | 5.35E-41 | postive |
| ALOX12    | AL355297.2 | 0.465929042 | 2.12E-30 | postive |
| GABPB1    | AL355297.2 | 0.53381627  | 4.96E-41 | postive |
| LINC00472 | AL355297.2 | 0.677542412 | 1.13E-73 | postive |
| ATM       | AL355297.2 | 0.492225168 | 3.09E-34 | postive |
| HELLS     | AC079760.1 | 0.446518658 | 8.99E-28 | postive |
| TUBE1     | AC079760.1 | 0.422500523 | 9.52E-25 | postive |

|           |            |             |          |         |
|-----------|------------|-------------|----------|---------|
| ALOX12    | AC079760.1 | 0.440121623 | 6.07E-27 | postive |
| GABPB1    | AC079760.1 | 0.404978889 | 1.09E-22 | postive |
| ATM       | AC079760.1 | 0.664258148 | 6.98E-70 | postive |
| HELLS     | SCAT2      | 0.436175452 | 1.93E-26 | postive |
| ZNF419    | SCAT2      | 0.46580569  | 2.21E-30 | postive |
| TUBE1     | SCAT2      | 0.464448312 | 3.42E-30 | postive |
| ALOX12    | SCAT2      | 0.421126902 | 1.39E-24 | postive |
| PHKG2     | SCAT2      | 0.615387764 | 1.77E-57 | postive |
| TAZ       | SCAT2      | 0.66274474  | 1.83E-69 | postive |
| RB1       | TNFRSF10A- | 0.581542907 | 4.34E-50 | postive |
| IREB2     | TNFRSF10A- | 0.427870555 | 2.10E-25 | postive |
| HMGB1     | TNFRSF10A- | 0.4074624   | 5.65E-23 | postive |
| SP1       | TNFRSF10A- | 0.413473248 | 1.13E-23 | postive |
| EMC2      | TNFRSF10A- | 0.411089828 | 2.15E-23 | postive |
| NRAS      | TNFRSF10A- | 0.539436859 | 5.04E-42 | postive |
| KRAS      | TNFRSF10A- | 0.406249701 | 7.79E-23 | postive |
| MAPK8     | TNFRSF10A- | 0.487810313 | 1.44E-33 | postive |
| PRKAA2    | TNFRSF10A- | 0.497702863 | 4.44E-35 | postive |
| PRKAA1    | TNFRSF10A- | 0.478859291 | 3.03E-32 | postive |
| ATM       | TNFRSF10A- | 0.557272661 | 2.67E-45 | postive |
| SIRT1     | TNFRSF10A- | 0.540428139 | 3.36E-42 | postive |
| BACH1     | TNFRSF10A- | 0.408286188 | 4.54E-23 | postive |
| HELLS     | MED8-AS1   | 0.409938337 | 2.93E-23 | postive |
| BRD4      | MED8-AS1   | 0.415845195 | 5.95E-24 | postive |
| ZNF419    | MED8-AS1   | 0.535140177 | 2.90E-41 | postive |
| TUBE1     | MED8-AS1   | 0.485200377 | 3.53E-33 | postive |
| SETD1B    | MED8-AS1   | 0.434115059 | 3.52E-26 | postive |
| ALOX12    | MED8-AS1   | 0.490576824 | 5.49E-34 | postive |
| PHKG2     | MED8-AS1   | 0.453714172 | 1.00E-28 | postive |
| ATM       | MED8-AS1   | 0.417204033 | 4.11E-24 | postive |
| TAZ       | MED8-AS1   | 0.530792771 | 1.66E-40 | postive |
| FBXW7     | MED8-AS1   | 0.429055587 | 1.50E-25 | postive |
| TFAP2C    | AC126773.3 | 0.585704381 | 5.96E-51 | postive |
| HBA1      | AC126773.3 | 0.555579524 | 5.57E-45 | postive |
| DUOX1     | AC126773.3 | 0.402709608 | 1.97E-22 | postive |
| ZNF419    | LINC02062  | 0.485787913 | 2.88E-33 | postive |
| TUBE1     | LINC02062  | 0.454975558 | 6.76E-29 | postive |
| ALOX12    | LINC02062  | 0.494021353 | 1.64E-34 | postive |
| PHKG2     | LINC02062  | 0.512474909 | 1.99E-37 | postive |
| TAZ       | LINC02062  | 0.665104826 | 4.05E-70 | postive |
| HELLS     | AL049539.1 | 0.525957246 | 1.13E-39 | postive |
| ALOX12    | AL049539.1 | 0.438053848 | 1.12E-26 | postive |
| TFAP2C    | AL049539.1 | 0.4239679   | 6.32E-25 | postive |
| GABPB1    | AL049539.1 | 0.430046564 | 1.13E-25 | postive |
| DUOX1     | AL049539.1 | 0.426471596 | 3.13E-25 | postive |
| LINC00472 | AL049539.1 | 0.514300365 | 1.00E-37 | postive |
| ATM       | AL049539.1 | 0.437769891 | 1.21E-26 | postive |
| ZNF419    | AL161935.1 | 0.427425141 | 2.39E-25 | postive |
| TUBE1     | AL161935.1 | 0.444032591 | 1.90E-27 | postive |
| ALOX12    | AL161935.1 | 0.580258298 | 7.96E-50 | postive |
| TAZ       | AL161935.1 | 0.492713983 | 2.60E-34 | postive |
| LINC00472 | AL358216.1 | 0.415897319 | 5.87E-24 | postive |
| ATM       | AL358216.1 | 0.52178833  | 5.72E-39 | postive |
| ACSL3     | NCOA7-AS1  | 0.425949262 | 3.62E-25 | postive |
| KLHL24    | NCOA7-AS1  | 0.69856268  | 4.30E-80 | postive |
| IREB2     | NCOA7-AS1  | 0.427758674 | 2.17E-25 | postive |
| PIK3CA    | NCOA7-AS1  | 0.500190389 | 1.82E-35 | postive |
| KRAS      | NCOA7-AS1  | 0.453881028 | 9.49E-29 | postive |

|           |            |             |           |         |
|-----------|------------|-------------|-----------|---------|
| GABARAPL1 | NCOA7-AS1  | 0.467398863 | 1.32E-30  | postive |
| LINC00472 | NCOA7-AS1  | 0.901011195 | 6.37E-197 | postive |
| PRKAA1    | NCOA7-AS1  | 0.406424116 | 7.44E-23  | postive |
| LPIN1     | NCOA7-AS1  | 0.58792924  | 2.04E-51  | postive |
| HELLS     | AL442128.2 | 0.453070559 | 1.22E-28  | postive |
| ZNF419    | AL442128.2 | 0.556001084 | 4.64E-45  | postive |
| TUBE1     | AL442128.2 | 0.603438973 | 9.07E-55  | postive |
| ALOX12    | AL442128.2 | 0.564386091 | 1.16E-46  | postive |
| GABPB1    | AL442128.2 | 0.547681698 | 1.63E-43  | postive |
| PHKG2     | AL442128.2 | 0.47665932  | 6.33E-32  | postive |
| LINC00472 | AL442128.2 | 0.522071888 | 5.12E-39  | postive |
| ATM       | AL442128.2 | 0.512529174 | 1.95E-37  | postive |
| TAZ       | AL442128.2 | 0.552573559 | 2.04E-44  | postive |
| FBXW7     | AL442128.2 | 0.454946465 | 6.82E-29  | postive |
| PHKG2     | AC110772.2 | 0.430150669 | 1.10E-25  | postive |
| MTOR      | AC024075.3 | 0.457366    | 3.21E-29  | postive |
| ZNF419    | AC024075.3 | 0.512305452 | 2.12E-37  | postive |
| KLHL24    | AC024075.3 | 0.542350445 | 1.52E-42  | postive |
| TUBE1     | AC024075.3 | 0.469223132 | 7.32E-31  | postive |
| SETD1B    | AC024075.3 | 0.432594054 | 5.46E-26  | postive |
| ALOX12    | AC024075.3 | 0.457337112 | 3.24E-29  | postive |
| IREB2     | AC024075.3 | 0.522192051 | 4.89E-39  | postive |
| GABPB1    | AC024075.3 | 0.502117167 | 9.06E-36  | postive |
| PIK3CA    | AC024075.3 | 0.441968237 | 3.51E-27  | postive |
| MAPK8     | AC024075.3 | 0.462618563 | 6.13E-30  | postive |
| LINC00472 | AC024075.3 | 0.627901012 | 1.91E-60  | postive |
| LPIN1     | AC024075.3 | 0.47024513  | 5.25E-31  | postive |
| ATM       | AC024075.3 | 0.645177271 | 9.06E-65  | postive |
| FBXW7     | AC024075.3 | 0.497465024 | 4.83E-35  | postive |
| FANCD2    | AL683807.1 | 0.42605114  | 3.52E-25  | postive |
| ALOX12    | AL683807.1 | 0.430130109 | 1.11E-25  | postive |
| IFNG      | AL683807.1 | 0.405645583 | 9.13E-23  | postive |
| TAZ       | AL683807.1 | 0.455663612 | 5.46E-29  | postive |
| FBXW7     | AL683807.1 | 0.400895784 | 3.15E-22  | postive |
| TFAP2C    | AL589739.1 | 0.581116168 | 5.31E-50  | postive |
| HBA1      | AL589739.1 | 0.553360692 | 1.45E-44  | postive |
| ZNF419    | AL031709.1 | 0.573518041 | 1.84E-48  | postive |
| VEGFA     | AL031709.1 | 0.521964887 | 5.34E-39  | postive |
| TUBE1     | AL031709.1 | 0.607739638 | 9.89E-56  | postive |
| SETD1B    | AL031709.1 | 0.512944164 | 1.67E-37  | postive |
| ALOX12    | AL031709.1 | 0.742150058 | 2.23E-95  | postive |
| GABPB1    | AL031709.1 | 0.405076361 | 1.06E-22  | postive |
| ATM       | AL031709.1 | 0.504795723 | 3.42E-36  | postive |
| TAZ       | AL031709.1 | 0.454559617 | 7.69E-29  | postive |
| TUBE1     | LINC00240  | 0.414364442 | 8.90E-24  | postive |
| PHKG2     | AL359881.2 | 0.540784512 | 2.90E-42  | postive |
| TAZ       | AL359881.2 | 0.41495448  | 7.58E-24  | postive |
| LINC00472 | MCPH1-AS1  | 0.407623724 | 5.42E-23  | postive |
| ATM       | MCPH1-AS1  | 0.460627027 | 1.15E-29  | postive |
| HELLS     | AC022306.3 | 0.445330075 | 1.29E-27  | postive |
| TUBE1     | AC022306.3 | 0.426440479 | 3.15E-25  | postive |
| NOX1      | AC022306.3 | 0.462354871 | 6.66E-30  | postive |
| HELLS     | RNF216P1   | 0.472730034 | 2.32E-31  | postive |
| ASNS      | RNF216P1   | 0.437178775 | 1.44E-26  | postive |
| ALOX12    | AC005479.1 | 0.415273758 | 6.95E-24  | postive |
| ATM       | AC005479.1 | 0.531626533 | 1.19E-40  | postive |
| LAMP2     | LINC01705  | 0.500265693 | 1.77E-35  | postive |
| PHKG2     | AL139286.1 | 0.493566132 | 1.93E-34  | postive |

|           |            |             |          |         |
|-----------|------------|-------------|----------|---------|
| TAZ       | AL139286.1 | 0.441292173 | 4.29E-27 | postive |
| TFAP2C    | AC022960.1 | 0.575814509 | 6.36E-49 | postive |
| HBA1      | AC022960.1 | 0.520839625 | 8.25E-39 | postive |
| DUOX1     | AC022960.1 | 0.421739256 | 1.18E-24 | postive |
| CA9       | SNHG18     | 0.407144033 | 6.15E-23 | postive |
| SLC2A6    | LINC01871  | 0.469048293 | 7.75E-31 | postive |
| BID       | LINC01871  | 0.41778749  | 3.50E-24 | postive |
| IFNG      | LINC01871  | 0.546531538 | 2.65E-43 | postive |
| BRD4      | AL031186.1 | 0.419375752 | 2.26E-24 | postive |
| ZNF419    | AL031186.1 | 0.544025349 | 7.56E-43 | postive |
| TUBE1     | AL031186.1 | 0.42805361  | 2.00E-25 | postive |
| SETD1B    | AL031186.1 | 0.500833695 | 1.44E-35 | postive |
| ALOX12    | AL031186.1 | 0.490027889 | 6.65E-34 | postive |
| PHKG2     | AL031186.1 | 0.525152867 | 1.54E-39 | postive |
| TAZ       | AL031186.1 | 0.638285963 | 5.19E-63 | postive |
| ACSL3     | AC112220.2 | 0.458548749 | 2.22E-29 | postive |
| OXSRI     | AC112220.2 | 0.535119291 | 2.93E-41 | postive |
| KLHL24    | AC112220.2 | 0.608131538 | 8.07E-56 | postive |
| IREB2     | AC112220.2 | 0.498377694 | 3.49E-35 | postive |
| PIK3CA    | AC112220.2 | 0.501447448 | 1.15E-35 | postive |
| KRAS      | AC112220.2 | 0.459410919 | 1.69E-29 | postive |
| GABARAPL1 | AC112220.2 | 0.527223612 | 6.85E-40 | postive |
| MAPK8     | AC112220.2 | 0.40270306  | 1.97E-22 | postive |
| LINC00472 | AC112220.2 | 0.491037986 | 4.68E-34 | postive |
| PRKAA1    | AC112220.2 | 0.460938909 | 1.04E-29 | postive |
| BAP1      | AC112220.2 | 0.442683569 | 2.84E-27 | postive |
| LPIN1     | AC112220.2 | 0.484740186 | 4.13E-33 | postive |
| HELLS     | AL138921.1 | 0.455137747 | 6.43E-29 | postive |
| ZNF419    | AL138921.1 | 0.522909312 | 3.70E-39 | postive |
| TUBE1     | AL138921.1 | 0.608976297 | 5.20E-56 | postive |
| SETD1B    | AL138921.1 | 0.407980564 | 4.93E-23 | postive |
| ALOX12    | AL138921.1 | 0.638526612 | 4.52E-63 | postive |
| GABPB1    | AL138921.1 | 0.476291032 | 7.15E-32 | postive |
| LINC00472 | AL138921.1 | 0.428837653 | 1.60E-25 | postive |
| ATM       | AL138921.1 | 0.533350768 | 5.98E-41 | postive |
| TAZ       | AL138921.1 | 0.498958563 | 2.83E-35 | postive |
| FBXW7     | AL138921.1 | 0.498299449 | 3.58E-35 | postive |
| HELLS     | AC090425.3 | 0.419196244 | 2.38E-24 | postive |
| TUBE1     | AC090425.3 | 0.416526964 | 4.94E-24 | postive |
| GABPB1    | AC090425.3 | 0.409679957 | 3.14E-23 | postive |
| ATM       | AC090425.3 | 0.463318299 | 4.90E-30 | postive |
| ALOX12    | SUV39H2-D1 | 0.407496402 | 5.60E-23 | postive |
| PHKG2     | SUV39H2-D1 | 0.407408706 | 5.73E-23 | postive |
| TAZ       | SUV39H2-D1 | 0.538553877 | 7.24E-42 | postive |
| FANCD2    | LINC00460  | 0.441582756 | 3.94E-27 | postive |
| STMN1     | LINC00460  | 0.520268565 | 1.03E-38 | postive |
| RRM2      | LINC00460  | 0.572292088 | 3.23E-48 | postive |
| AURKA     | LINC00460  | 0.542306356 | 1.54E-42 | postive |
| CDKN2A    | LINC00460  | 0.52895831  | 3.45E-40 | postive |
| PANX1     | LINC00460  | 0.42488681  | 4.88E-25 | postive |
| TFAP2C    | AC100847.1 | 0.556312835 | 4.05E-45 | postive |
| HBA1      | AC100847.1 | 0.505602445 | 2.54E-36 | postive |
| ISCU      | SBF2-AS1   | 0.566836912 | 3.86E-47 | postive |
| DDIT3     | SBF2-AS1   | 0.503911122 | 4.72E-36 | postive |
| KLHL24    | SBF2-AS1   | 0.413093739 | 1.25E-23 | postive |
| ATG4D     | SBF2-AS1   | 0.402861297 | 1.89E-22 | postive |
| GABARAPL1 | SBF2-AS1   | 0.540235087 | 3.63E-42 | postive |
| ALOX12    | ADORA2A-A  | 0.437285862 | 1.40E-26 | postive |

|           |            |              |          |          |
|-----------|------------|--------------|----------|----------|
| GPX4      | AL023284.4 | 0.408791817  | 3.97E-23 | postive  |
| HRAS      | AL023284.4 | 0.414971301  | 7.55E-24 | postive  |
| PEBP1     | AL023284.4 | 0.505909061  | 2.27E-36 | postive  |
| MTDH      | AL023284.4 | -0.425855417 | 3.72E-25 | negative |
| BACH1     | AL023284.4 | -0.425314895 | 4.33E-25 | negative |
| OTUB1     | URB1-AS1   | 0.459486938  | 1.65E-29 | postive  |
| CHMP6     | URB1-AS1   | 0.420954622  | 1.46E-24 | postive  |
| FANCD2    | AC003102.1 | 0.408784526  | 3.98E-23 | postive  |
| BRD4      | AC003102.1 | 0.444580844  | 1.61E-27 | postive  |
| ZNF419    | AC003102.1 | 0.552998101  | 1.70E-44 | postive  |
| TUBE1     | AC003102.1 | 0.433386234  | 4.34E-26 | postive  |
| DRD4      | AC003102.1 | 0.41266403   | 1.41E-23 | postive  |
| ALOX12    | AC003102.1 | 0.541522059  | 2.14E-42 | postive  |
| PHKG2     | AC003102.1 | 0.55771723   | 2.20E-45 | postive  |
| TAZ       | AC003102.1 | 0.628072481  | 1.74E-60 | postive  |
| SLC3A2    | AC021087.4 | 0.419662465  | 2.09E-24 | postive  |
| ISCU      | AC021087.4 | 0.473890644  | 1.59E-31 | postive  |
| CHAC1     | AC021087.4 | 0.420029462  | 1.89E-24 | postive  |
| DDIT3     | AC021087.4 | 0.551119913  | 3.79E-44 | postive  |
| SLC2A12   | AC021087.4 | 0.413610362  | 1.09E-23 | postive  |
| ATG4D     | AC021087.4 | 0.503997261  | 4.57E-36 | postive  |
| MAP1LC3A  | AC021087.4 | 0.546400094  | 2.80E-43 | postive  |
| GABARAPL1 | AC021087.4 | 0.63821698   | 5.40E-63 | postive  |
| WIPI2     | AC021087.4 | 0.502550126  | 7.74E-36 | postive  |
| LPIN1     | AC021087.4 | 0.462875989  | 5.64E-30 | postive  |
| HELLS     | AC002064.2 | 0.579303838  | 1.25E-49 | postive  |
| TUBE1     | AC002064.2 | 0.477897455  | 4.18E-32 | postive  |
| ALOX12    | AC002064.2 | 0.57398359   | 1.49E-48 | postive  |
| GABPB1    | AC002064.2 | 0.462964206  | 5.49E-30 | postive  |
| DUOX1     | AC002064.2 | 0.42504409   | 4.67E-25 | postive  |
| ATM       | AC002064.2 | 0.611335472  | 1.51E-56 | postive  |
| FBXW7     | AC002064.2 | 0.476157866  | 7.48E-32 | postive  |
| HELLS     | AC008731.1 | 0.460761674  | 1.10E-29 | postive  |
| ZNF419    | AC008731.1 | 0.407250838  | 5.98E-23 | postive  |
| ALOX12    | AC008731.1 | 0.491048852  | 4.66E-34 | postive  |
| TFAP2C    | AC008731.1 | 0.443549539  | 2.19E-27 | postive  |
| GABPB1    | AC008731.1 | 0.41911325   | 2.43E-24 | postive  |
| DUOX1     | AC008731.1 | 0.435170039  | 2.59E-26 | postive  |
| LINC00472 | AC008731.1 | 0.565634644  | 6.62E-47 | postive  |
| ATM       | AC008731.1 | 0.409469722  | 3.32E-23 | postive  |
| FBXW7     | AC008731.1 | 0.404801192  | 1.14E-22 | postive  |
| ATM       | AC026412.3 | 0.433350703  | 4.39E-26 | postive  |
| TAZ       | AC026412.3 | 0.409835584  | 3.01E-23 | postive  |
| KLHL24    | ZRANB2-AS1 | 0.415744002  | 6.12E-24 | postive  |
| TUBE1     | ZRANB2-AS1 | 0.413100268  | 1.25E-23 | postive  |
| IREB2     | ZRANB2-AS1 | 0.409980569  | 2.89E-23 | postive  |
| GABPB1    | ZRANB2-AS1 | 0.409948984  | 2.92E-23 | postive  |
| MAPK8     | ZRANB2-AS1 | 0.404536986  | 1.22E-22 | postive  |
| LINC00472 | ZRANB2-AS1 | 0.606091081  | 2.32E-55 | postive  |
| LPIN1     | ZRANB2-AS1 | 0.406798791  | 6.74E-23 | postive  |
| ATM       | ZRANB2-AS1 | 0.593463239  | 1.36E-52 | postive  |
| PHKG2     | LINC01341  | 0.450135265  | 3.00E-28 | postive  |
| TAZ       | LINC01341  | 0.540414751  | 3.37E-42 | postive  |
| FANCD2    | KLRK1-AS1  | 0.583831792  | 1.46E-50 | postive  |
| HELLS     | KLRK1-AS1  | 0.576306887  | 5.06E-49 | postive  |
| HELLS     | AC018809.2 | 0.469136133  | 7.53E-31 | postive  |
| ZNF419    | AC018809.2 | 0.455939446  | 5.01E-29 | postive  |
| TUBE1     | AC018809.2 | 0.487910185  | 1.39E-33 | postive  |

|           |            |             |          |         |
|-----------|------------|-------------|----------|---------|
| ALOX12    | AC018809.2 | 0.573014666 | 2.32E-48 | postive |
| GABPB1    | AC018809.2 | 0.505421217 | 2.72E-36 | postive |
| MAPK8     | AC018809.2 | 0.437948015 | 1.15E-26 | postive |
| LINC00472 | AC018809.2 | 0.494663888 | 1.31E-34 | postive |
| ATM       | AC018809.2 | 0.660893547 | 5.92E-69 | postive |
| FBXW7     | AC018809.2 | 0.445376566 | 1.27E-27 | postive |
| TUBE1     | AC135050.6 | 0.412472452 | 1.48E-23 | postive |
| PHKG2     | AC135050.6 | 0.572355694 | 3.14E-48 | postive |
| ATG4D     | AC135050.6 | 0.410341092 | 2.63E-23 | postive |
| TAZ       | AC135050.6 | 0.507474904 | 1.28E-36 | postive |
| CD44      | LINC01605  | 0.401740868 | 2.53E-22 | postive |
| SLC1A5    | LINC01605  | 0.425131932 | 4.56E-25 | postive |
| CDKN2A    | LINC01605  | 0.423260018 | 7.70E-25 | postive |
| HELLS     | AL031673.1 | 0.434050473 | 3.58E-26 | postive |
| TUBE1     | AL031673.1 | 0.512106062 | 2.28E-37 | postive |
| ALOX12    | AL031673.1 | 0.4870257   | 1.88E-33 | postive |
| LINC00472 | AL031673.1 | 0.492320272 | 2.98E-34 | postive |
| ATM       | AL031673.1 | 0.543484222 | 9.47E-43 | postive |
| HELLS     | AL132989.1 | 0.452573408 | 1.42E-28 | postive |
| ZNF419    | AL132989.1 | 0.565199446 | 8.05E-47 | postive |
| VEGFA     | AL132989.1 | 0.480491899 | 1.75E-32 | postive |
| TUBE1     | AL132989.1 | 0.654683238 | 2.86E-67 | postive |
| SETD1B    | AL132989.1 | 0.529526991 | 2.75E-40 | postive |
| ALOX12    | AL132989.1 | 0.708274524 | 2.97E-83 | postive |
| GABPB1    | AL132989.1 | 0.548099312 | 1.37E-43 | postive |
| MAPK8     | AL132989.1 | 0.478980168 | 2.91E-32 | postive |
| LINC00472 | AL132989.1 | 0.537106566 | 1.31E-41 | postive |
| ATM       | AL132989.1 | 0.682038489 | 5.33E-75 | postive |
| YY1AP1    | AL132989.1 | 0.417666349 | 3.62E-24 | postive |
| FBXW7     | AL132989.1 | 0.524749948 | 1.81E-39 | postive |
| HELLS     | OSMR-AS1   | 0.582961173 | 2.21E-50 | postive |
| TUBE1     | OSMR-AS1   | 0.461276827 | 9.38E-30 | postive |
| ALOX12    | OSMR-AS1   | 0.543848333 | 8.14E-43 | postive |
| GABPB1    | OSMR-AS1   | 0.514861746 | 8.09E-38 | postive |
| LINC00472 | OSMR-AS1   | 0.468851116 | 8.26E-31 | postive |
| ATM       | OSMR-AS1   | 0.674246255 | 1.03E-72 | postive |
| FBXW7     | OSMR-AS1   | 0.503349296 | 5.79E-36 | postive |
| TFAP2C    | AC119396.1 | 0.585762978 | 5.79E-51 | postive |
| HBA1      | AC119396.1 | 0.526129588 | 1.05E-39 | postive |
| DUOX1     | AC119396.1 | 0.409605584 | 3.20E-23 | postive |
| ISCU      | AP000894.4 | 0.554539092 | 8.74E-45 | postive |
| GOT1      | AP000894.4 | 0.446513264 | 9.01E-28 | postive |
| ATG4D     | AP000894.4 | 0.572418464 | 3.05E-48 | postive |
| GABARAPL2 | AP000894.4 | 0.522204937 | 4.87E-39 | postive |
| GABARAPL1 | AP000894.4 | 0.418082654 | 3.23E-24 | postive |
| ISCU      | AC027682.6 | 0.495322874 | 1.03E-34 | postive |
| ATG4D     | AC027682.6 | 0.47278177  | 2.29E-31 | postive |
| MAP1LC3A  | AC027682.6 | 0.487483151 | 1.61E-33 | postive |
| GABARAPL2 | AC027682.6 | 0.449181857 | 4.01E-28 | postive |
| HELLS     | AC004466.3 | 0.426214082 | 3.36E-25 | postive |
| ZNF419    | AC004466.3 | 0.466886866 | 1.56E-30 | postive |
| TUBE1     | AC004466.3 | 0.484230568 | 4.92E-33 | postive |
| ALOX12    | AC004466.3 | 0.474312842 | 1.38E-31 | postive |
| GABPB1    | AC004466.3 | 0.575420493 | 7.64E-49 | postive |
| MAPK8     | AC004466.3 | 0.401562236 | 2.65E-22 | postive |
| LINC00472 | AC004466.3 | 0.728822579 | 2.18E-90 | postive |
| ATM       | AC004466.3 | 0.608286984 | 7.44E-56 | postive |
| FBXW7     | AC004466.3 | 0.481660894 | 1.18E-32 | postive |

|           |            |              |           |          |
|-----------|------------|--------------|-----------|----------|
| HBA1      | AC016735.1 | 0.440471528  | 5.47E-27  | postive  |
| HELLS     | MIR34AHG   | 0.40695598   | 6.46E-23  | postive  |
| ALOX12    | MIR34AHG   | 0.500709038  | 1.51E-35  | postive  |
| ATM       | MIR34AHG   | 0.605648259  | 2.92E-55  | postive  |
| FBXW7     | MIR34AHG   | 0.438082177  | 1.11E-26  | postive  |
| HELLS     | AC021851.1 | 0.548964915  | 9.48E-44  | postive  |
| ZNF419    | AC021851.1 | 0.447599827  | 6.49E-28  | postive  |
| TUBE1     | AC021851.1 | 0.635951652  | 2.00E-62  | postive  |
| ALOX12    | AC021851.1 | 0.529564882  | 2.71E-40  | postive  |
| GABPB1    | AC021851.1 | 0.555570371  | 5.59E-45  | postive  |
| ATM       | AC021851.1 | 0.640526028  | 1.41E-63  | postive  |
| TAZ       | AC021851.1 | 0.419694921  | 2.07E-24  | postive  |
| FBXW7     | AC021851.1 | 0.493197973  | 2.19E-34  | postive  |
| HELLS     | AC068790.3 | 0.525084348  | 1.59E-39  | postive  |
| TUBE1     | AC068790.3 | 0.490488037  | 5.67E-34  | postive  |
| ALOX12    | AC068790.3 | 0.461155207  | 9.75E-30  | postive  |
| GABPB1    | AC068790.3 | 0.574188292  | 1.35E-48  | postive  |
| MAPK8     | AC068790.3 | 0.423323031  | 7.57E-25  | postive  |
| LINC00472 | AC068790.3 | 0.745417364  | 1.20E-96  | postive  |
| ATM       | AC068790.3 | 0.739918162  | 1.61E-94  | postive  |
| FBXW7     | AC068790.3 | 0.495358441  | 1.02E-34  | postive  |
| TFAP2C    | LINC00551  | 0.532785702  | 7.50E-41  | postive  |
| HBA1      | LINC00551  | 0.489356526  | 8.40E-34  | postive  |
| CD44      | CD44-AS1   | 0.61587292   | 1.36E-57  | postive  |
| SOCS1     | CD44-AS1   | 0.624089069  | 1.58E-59  | postive  |
| HRAS      | CDC37L1-DT | 0.598314551  | 1.22E-53  | postive  |
| EGLN2     | CDC37L1-DT | 0.59409616   | 9.96E-53  | postive  |
| HELLS     | AC108010.1 | 0.468226882  | 1.01E-30  | postive  |
| MTOR      | AC108010.1 | 0.428319232  | 1.85E-25  | postive  |
| ZNF419    | AC108010.1 | 0.454952497  | 6.81E-29  | postive  |
| VEGFA     | AC108010.1 | 0.414296263  | 9.06E-24  | postive  |
| TUBE1     | AC108010.1 | 0.517358754  | 3.13E-38  | postive  |
| SETD1B    | AC108010.1 | 0.48424276   | 4.89E-33  | postive  |
| ALOX12    | AC108010.1 | 0.637915765  | 6.43E-63  | postive  |
| IREB2     | AC108010.1 | 0.481414402  | 1.28E-32  | postive  |
| SP1       | AC108010.1 | 0.44629383   | 9.62E-28  | postive  |
| GABPB1    | AC108010.1 | 0.497658905  | 4.51E-35  | postive  |
| ZEB1      | AC108010.1 | 0.40029981   | 3.68E-22  | postive  |
| MAPK8     | AC108010.1 | 0.495530346  | 9.62E-35  | postive  |
| LINC00472 | AC108010.1 | 0.530882313  | 1.61E-40  | postive  |
| ATM       | AC108010.1 | 0.775369237  | 2.82E-109 | postive  |
| FBXW7     | AC108010.1 | 0.517829632  | 2.62E-38  | postive  |
| GPX4      | SNHG9      | 0.479320606  | 2.60E-32  | postive  |
| RB1       | SNHG9      | -0.414165127 | 9.39E-24  | negative |
| HSPB1     | SNHG9      | 0.64422756   | 1.59E-64  | postive  |
| OXSR1     | SNHG9      | -0.409839109 | 3.00E-23  | negative |
| MAPK14    | SNHG9      | -0.437086453 | 1.48E-26  | negative |
| SLC2A6    | SNHG9      | 0.409461775  | 3.32E-23  | postive  |
| IREB2     | SNHG9      | -0.458373231 | 2.34E-29  | negative |
| HBA1      | SNHG9      | 0.454699126  | 7.37E-29  | postive  |
| NOX1      | SNHG9      | 0.423379914  | 7.45E-25  | postive  |
| PIK3CA    | SNHG9      | -0.42976685  | 1.23E-25  | negative |
| NRAS      | SNHG9      | -0.41303643  | 1.27E-23  | negative |
| KRAS      | SNHG9      | -0.410249396 | 2.69E-23  | negative |
| HRAS      | SNHG9      | 0.7057182    | 2.08E-82  | postive  |
| NCOA4     | SNHG9      | -0.532168761 | 9.60E-41  | negative |
| PHKG2     | SNHG9      | 0.602595056  | 1.40E-54  | postive  |
| BECN1     | SNHG9      | -0.500333901 | 1.73E-35  | negative |



|           |            |              |           |          |
|-----------|------------|--------------|-----------|----------|
| MAP1LC3A  | SNHG9      | 0.41620976   | 5.39E-24  | postive  |
| MAPK1     | SNHG9      | -0.466203141 | 1.94E-30  | negative |
| PRKAA1    | SNHG9      | -0.426044899 | 3.53E-25  | negative |
| ANO6      | SNHG9      | -0.403379985 | 1.65E-22  | negative |
| EGLN2     | SNHG9      | 0.56852535   | 1.80E-47  | postive  |
| TAZ       | SNHG9      | 0.501107519  | 1.31E-35  | postive  |
| SIRT1     | SNHG9      | -0.451707426 | 1.85E-28  | negative |
| HELLS     | AC007619.1 | 0.480166905  | 1.95E-32  | postive  |
| ALOX12    | AC007619.1 | 0.441941256  | 3.54E-27  | postive  |
| TFAP2C    | AC007619.1 | 0.477232224  | 5.23E-32  | postive  |
| HBA1      | AC007619.1 | 0.420512154  | 1.65E-24  | postive  |
| DUOX1     | AC007619.1 | 0.435709513  | 2.21E-26  | postive  |
| LINC00472 | AC007619.1 | 0.455748268  | 5.32E-29  | postive  |
| FH        | MCF2L-AS1  | 0.419070737  | 2.46E-24  | postive  |
| ISCU      | MCF2L-AS1  | 0.589627756  | 8.93E-52  | postive  |
| DDIT3     | MCF2L-AS1  | 0.428553092  | 1.73E-25  | postive  |
| GPT2      | MCF2L-AS1  | 0.407107496  | 6.21E-23  | postive  |
| KLHL24    | MCF2L-AS1  | 0.412609575  | 1.43E-23  | postive  |
| SLC2A8    | MCF2L-AS1  | 0.419484765  | 2.19E-24  | postive  |
| SLC2A12   | MCF2L-AS1  | 0.466402527  | 1.82E-30  | postive  |
| CS        | MCF2L-AS1  | 0.401787418  | 2.50E-22  | postive  |
| ATG4D     | MCF2L-AS1  | 0.611999605  | 1.07E-56  | postive  |
| MAP1LC3A  | MCF2L-AS1  | 0.448980836  | 4.27E-28  | postive  |
| GABARAPL1 | MCF2L-AS1  | 0.722564967  | 3.79E-88  | postive  |
| WIP1      | MCF2L-AS1  | 0.501028245  | 1.34E-35  | postive  |
| LPIN1     | MCF2L-AS1  | 0.633221264  | 9.53E-62  | postive  |
| HELLS     | LINC01239  | 0.440980274  | 4.71E-27  | postive  |
| ALOX12    | LINC01239  | 0.429829606  | 1.21E-25  | postive  |
| ATM       | LINC01239  | 0.485012416  | 3.76E-33  | postive  |
| IREB2     | AC064807.1 | 0.404167498  | 1.35E-22  | postive  |
| HELLS     | AC004000.1 | 0.459453941  | 1.67E-29  | postive  |
| ALOX12    | AC004000.1 | 0.417968143  | 3.33E-24  | postive  |
| TFAP2C    | AC004000.1 | 0.471694652  | 3.27E-31  | postive  |
| HBA1      | AC004000.1 | 0.44664731   | 8.65E-28  | postive  |
| DUOX1     | AC004000.1 | 0.411050878  | 2.17E-23  | postive  |
| ACSL3     | AL353699.1 | 0.406722103  | 6.87E-23  | postive  |
| KLHL24    | AL353699.1 | 0.651001412  | 2.73E-66  | postive  |
| PIK3CA    | AL353699.1 | 0.457548759  | 3.03E-29  | postive  |
| KRAS      | AL353699.1 | 0.406339826  | 7.60E-23  | postive  |
| GABARAPL1 | AL353699.1 | 0.462634398  | 6.10E-30  | postive  |
| LINC00472 | AL353699.1 | 0.798605939  | 1.66E-120 | postive  |
| LPIN1     | AL353699.1 | 0.529457951  | 2.83E-40  | postive  |
| HELLS     | AL513327.1 | 0.55715157   | 2.81E-45  | postive  |
| ZNF419    | AL513327.1 | 0.454952127  | 6.81E-29  | postive  |
| TUBE1     | AL513327.1 | 0.545924918  | 3.42E-43  | postive  |
| ALOX12    | AL513327.1 | 0.610689938  | 2.12E-56  | postive  |
| GABPB1    | AL513327.1 | 0.559479958  | 1.02E-45  | postive  |
| LINC00472 | AL513327.1 | 0.537722325  | 1.02E-41  | postive  |
| ATM       | AL513327.1 | 0.721972803  | 6.14E-88  | postive  |
| FBXW7     | AL513327.1 | 0.529697097  | 2.57E-40  | postive  |
| HELLS     | AC084357.2 | 0.46489867   | 2.96E-30  | postive  |
| ALOX12    | AC084357.2 | 0.440418106  | 5.56E-27  | postive  |
| TFAP2C    | AC084357.2 | 0.441037477  | 4.63E-27  | postive  |
| HSPB1     | NUP153-AS1 | 0.484260381  | 4.87E-33  | postive  |
| SLC2A6    | NUP153-AS1 | 0.496558073  | 6.67E-35  | postive  |
| IREB2     | NUP153-AS1 | -0.413592823 | 1.10E-23  | negative |
| HRAS      | NUP153-AS1 | 0.444218599  | 1.80E-27  | postive  |
| SLC1A5    | NUP153-AS1 | 0.413278166  | 1.19E-23  | postive  |

|           |            |              |          |          |
|-----------|------------|--------------|----------|----------|
| NCOA4     | NUP153-AS1 | -0.488395797 | 1.17E-33 | negative |
| PHKG2     | NUP153-AS1 | 0.500660027  | 1.53E-35 | postive  |
| MAPK1     | NUP153-AS1 | -0.421410866 | 1.29E-24 | negative |
| BID       | NUP153-AS1 | 0.476730333  | 6.18E-32 | postive  |
| MAPK9     | NUP153-AS1 | -0.402847163 | 1.90E-22 | negative |
| PRKAA2    | NUP153-AS1 | -0.407879878 | 5.06E-23 | negative |
| TAZ       | NUP153-AS1 | 0.464814512  | 3.04E-30 | postive  |
| HELLS     | SUGT1P4-ST | 0.473989686  | 1.53E-31 | postive  |
| ZNF419    | SUGT1P4-ST | 0.575343641  | 7.92E-49 | postive  |
| TUBE1     | SUGT1P4-ST | 0.609752069  | 3.47E-56 | postive  |
| ALOX12    | SUGT1P4-ST | 0.560546147  | 6.36E-46 | postive  |
| GABPB1    | SUGT1P4-ST | 0.54455144   | 6.07E-43 | postive  |
| MAPK8     | SUGT1P4-ST | 0.411751037  | 1.80E-23 | postive  |
| LINC00472 | SUGT1P4-ST | 0.566440905  | 4.61E-47 | postive  |
| ATM       | SUGT1P4-ST | 0.648781831  | 1.05E-65 | postive  |
| FBXW7     | SUGT1P4-ST | 0.478649981  | 3.25E-32 | postive  |
| HELLS     | AL162430.2 | 0.515361621  | 6.69E-38 | postive  |
| ALOX12    | AL162430.2 | 0.466196767  | 1.95E-30 | postive  |
| TFAP2C    | AL162430.2 | 0.42560957   | 3.99E-25 | postive  |
| GABPB1    | AL162430.2 | 0.426920654  | 2.75E-25 | postive  |
| DUOX1     | AL162430.2 | 0.439917469  | 6.45E-27 | postive  |
| LINC00472 | AL162430.2 | 0.529092193  | 3.27E-40 | postive  |
| ATM       | AL162430.2 | 0.473106156  | 2.05E-31 | postive  |
| FBXW7     | AL162430.2 | 0.405661689  | 9.09E-23 | postive  |
| BRD4      | CAPN10-DT  | 0.427447886  | 2.37E-25 | postive  |
| ZNF419    | CAPN10-DT  | 0.574351346  | 1.25E-48 | postive  |
| TUBE1     | CAPN10-DT  | 0.552642991  | 1.98E-44 | postive  |
| SETD1B    | CAPN10-DT  | 0.439385149  | 7.54E-27 | postive  |
| ALOX12    | CAPN10-DT  | 0.577897351  | 2.41E-49 | postive  |
| PHKG2     | CAPN10-DT  | 0.579782067  | 9.96E-50 | postive  |
| ULK1      | CAPN10-DT  | 0.427968663  | 2.05E-25 | postive  |
| TAZ       | CAPN10-DT  | 0.672857561  | 2.59E-72 | postive  |
| HELLS     | AC114316.1 | 0.503050131  | 6.46E-36 | postive  |
| TUBE1     | AC114316.1 | 0.421683192  | 1.19E-24 | postive  |
| GABPB1    | AC114316.1 | 0.446593079  | 8.79E-28 | postive  |
| LINC00472 | AC114316.1 | 0.421923662  | 1.12E-24 | postive  |
| ATM       | AC114316.1 | 0.656747207  | 7.96E-68 | postive  |
| ZNF419    | AC005740.4 | 0.483272842  | 6.81E-33 | postive  |
| VEGFA     | AC005740.4 | 0.516817189  | 3.85E-38 | postive  |
| TUBE1     | AC005740.4 | 0.504231858  | 4.20E-36 | postive  |
| SETD1B    | AC005740.4 | 0.44172467   | 3.78E-27 | postive  |
| ALOX12    | AC005740.4 | 0.487766301  | 1.46E-33 | postive  |
| GABPB1    | AC005740.4 | 0.491471082  | 4.02E-34 | postive  |
| PRDX1     | AC005740.4 | -0.40261118  | 2.02E-22 | negative |
| ZEB1      | AC005740.4 | 0.549632597  | 7.14E-44 | postive  |
| MAPK8     | AC005740.4 | 0.402884405  | 1.88E-22 | postive  |
| ATM       | AC005740.4 | 0.424639477  | 5.23E-25 | postive  |
| FBXW7     | AC005740.4 | 0.461861407  | 7.79E-30 | postive  |
| PCK2      | AC016888.1 | 0.432456798  | 5.68E-26 | postive  |
| BRD4      | AC040162.3 | 0.419891669  | 1.96E-24 | postive  |
| ZNF419    | AC040162.3 | 0.461166194  | 9.71E-30 | postive  |
| VEGFA     | AC040162.3 | 0.527836269  | 5.38E-40 | postive  |
| TUBE1     | AC040162.3 | 0.485757305  | 2.91E-33 | postive  |
| SETD1B    | AC040162.3 | 0.455105706  | 6.50E-29 | postive  |
| DRD4      | AC040162.3 | 0.471229935  | 3.80E-31 | postive  |
| ALOX12    | AC040162.3 | 0.520795635  | 8.39E-39 | postive  |
| NCOA4     | AC040162.3 | -0.442806809 | 2.74E-27 | negative |
| PHKG2     | AC040162.3 | 0.645252913  | 8.66E-65 | postive  |

|           |            |             |           |         |
|-----------|------------|-------------|-----------|---------|
| TAZ       | AC040162.3 | 0.775594819 | 2.23E-109 | postive |
| HELLS     | PRRT3-AS1  | 0.46537546  | 2.54E-30  | postive |
| HELLS     | AC100830.2 | 0.485059647 | 3.70E-33  | postive |
| ZNF419    | AC100830.2 | 0.453248137 | 1.15E-28  | postive |
| KLHL24    | AC100830.2 | 0.432222562 | 6.07E-26  | postive |
| TUBE1     | AC100830.2 | 0.4913868   | 4.14E-34  | postive |
| ALOX12    | AC100830.2 | 0.534079418 | 4.46E-41  | postive |
| IREB2     | AC100830.2 | 0.438079792 | 1.11E-26  | postive |
| GABPB1    | AC100830.2 | 0.57528695  | 8.13E-49  | postive |
| PIK3CA    | AC100830.2 | 0.401692918 | 2.57E-22  | postive |
| MAPK8     | AC100830.2 | 0.484544668 | 4.41E-33  | postive |
| LINC00472 | AC100830.2 | 0.772493156 | 5.58E-108 | postive |
| ATM       | AC100830.2 | 0.643325863 | 2.72E-64  | postive |
| FBXW7     | AC100830.2 | 0.480248453 | 1.90E-32  | postive |
| HELLS     | MACC1-AS1  | 0.467211531 | 1.40E-30  | postive |
| GABPB1    | MACC1-AS1  | 0.451661026 | 1.88E-28  | postive |
| LINC00472 | MACC1-AS1  | 0.40828956  | 4.54E-23  | postive |
| ATM       | MACC1-AS1  | 0.625035345 | 9.39E-60  | postive |
| MTOR      | AL450326.1 | 0.454347465 | 8.22E-29  | postive |
| MAFG      | AL450326.1 | 0.451971568 | 1.71E-28  | postive |
| CS        | AL450326.1 | 0.421261866 | 1.34E-24  | postive |
| LPCAT3    | AL450326.1 | 0.400418162 | 3.57E-22  | postive |
| BECN1     | AL450326.1 | 0.49307971  | 2.29E-34  | postive |
| HELLS     | AC092653.1 | 0.537687465 | 1.03E-41  | postive |
| TUBE1     | AC092653.1 | 0.512299099 | 2.12E-37  | postive |
| ALOX12    | AC092653.1 | 0.527867856 | 5.31E-40  | postive |
| GABPB1    | AC092653.1 | 0.560621267 | 6.15E-46  | postive |
| MAPK8     | AC092653.1 | 0.403404845 | 1.64E-22  | postive |
| LINC00472 | AC092653.1 | 0.63004822  | 5.74E-61  | postive |
| ATM       | AC092653.1 | 0.74941783  | 3.14E-98  | postive |
| FBXW7     | AC092653.1 | 0.476492434 | 6.69E-32  | postive |
| ZNF419    | AC010976.2 | 0.435534363 | 2.33E-26  | postive |
| VEGFA     | AC010976.2 | 0.433287226 | 4.47E-26  | postive |
| TUBE1     | AC010976.2 | 0.409306638 | 3.46E-23  | postive |
| ALOX12    | AC010976.2 | 0.444668567 | 1.57E-27  | postive |
| TAZ       | AC010976.2 | 0.464893667 | 2.96E-30  | postive |
| ZNF419    | BX649601.1 | 0.462481585 | 6.40E-30  | postive |
| ALOX12    | BX649601.1 | 0.505317177 | 2.82E-36  | postive |
| TAZ       | BX649601.1 | 0.471778767 | 3.18E-31  | postive |
| NQO1      | AP003119.2 | 0.420648097 | 1.59E-24  | postive |
| ASNS      | AP003119.2 | 0.411367253 | 2.00E-23  | postive |
| PSAT1     | AP003119.2 | 0.51361873  | 1.29E-37  | postive |
| G6PD      | AP003119.2 | 0.470039093 | 5.61E-31  | postive |
| SLC1A5    | AP003119.2 | 0.416990029 | 4.35E-24  | postive |
| HELLS     | TMEM30A-D  | 0.480548493 | 1.72E-32  | postive |
| ZNF419    | TMEM30A-D  | 0.516136235 | 4.99E-38  | postive |
| TUBE1     | TMEM30A-D  | 0.652126427 | 1.37E-66  | postive |
| ALOX12    | TMEM30A-D  | 0.638856183 | 3.73E-63  | postive |
| IREB2     | TMEM30A-D  | 0.443960536 | 1.94E-27  | postive |
| GABPB1    | TMEM30A-D  | 0.605447785 | 3.24E-55  | postive |
| MAPK8     | TMEM30A-D  | 0.553954546 | 1.12E-44  | postive |
| LINC00472 | TMEM30A-D  | 0.563123523 | 2.03E-46  | postive |
| ATM       | TMEM30A-D  | 0.688512376 | 5.91E-77  | postive |
| FBXW7     | TMEM30A-D  | 0.535186067 | 2.85E-41  | postive |
| ISCU      | UBAC2-AS1  | 0.426930649 | 2.75E-25  | postive |
| ATP5MC3   | UBAC2-AS1  | 0.402795682 | 1.93E-22  | postive |
| SLC2A8    | UBAC2-AS1  | 0.425676625 | 3.91E-25  | postive |
| SLC2A12   | UBAC2-AS1  | 0.411777191 | 1.79E-23  | postive |

|           |            |             |           |         |
|-----------|------------|-------------|-----------|---------|
| ATG4D     | UBAC2-AS1  | 0.424908305 | 4.85E-25  | postive |
| GABARAPL2 | UBAC2-AS1  | 0.514489066 | 9.31E-38  | postive |
| WIPI2     | UBAC2-AS1  | 0.449744672 | 3.38E-28  | postive |
| HELLS     | AP001469.3 | 0.581277241 | 4.92E-50  | postive |
| ZNF419    | AP001469.3 | 0.460191982 | 1.32E-29  | postive |
| TUBE1     | AP001469.3 | 0.459624231 | 1.58E-29  | postive |
| ALOX12    | AP001469.3 | 0.596566524 | 2.92E-53  | postive |
| GABPB1    | AP001469.3 | 0.513113507 | 1.56E-37  | postive |
| LINC00472 | AP001469.3 | 0.57982943  | 9.74E-50  | postive |
| ATM       | AP001469.3 | 0.56139139  | 4.38E-46  | postive |
| HELLS     | AL645939.4 | 0.457036197 | 3.56E-29  | postive |
| TUBE1     | AL645939.4 | 0.49750735  | 4.76E-35  | postive |
| ALOX12    | AL645939.4 | 0.455920324 | 5.04E-29  | postive |
| GABPB1    | AL645939.4 | 0.435656286 | 2.25E-26  | postive |
| ATM       | AL645939.4 | 0.507707201 | 1.17E-36  | postive |
| HELLS     | AL606834.2 | 0.46686953  | 1.57E-30  | postive |
| ATM       | AL606834.2 | 0.407140674 | 6.15E-23  | postive |
| FBXW7     | AL606834.2 | 0.41950948  | 2.18E-24  | postive |
| ZNF419    | ZNF32-AS2  | 0.555652897 | 5.40E-45  | postive |
| VEGFA     | ZNF32-AS2  | 0.57805922  | 2.24E-49  | postive |
| TUBE1     | ZNF32-AS2  | 0.61137897  | 1.48E-56  | postive |
| SETD1B    | ZNF32-AS2  | 0.549285724 | 8.28E-44  | postive |
| ALOX12    | ZNF32-AS2  | 0.667119732 | 1.11E-70  | postive |
| GABPB1    | ZNF32-AS2  | 0.400192256 | 3.78E-22  | postive |
| ATM       | ZNF32-AS2  | 0.486908623 | 1.96E-33  | postive |
| YY1AP1    | ZNF32-AS2  | 0.427987709 | 2.04E-25  | postive |
| TAZ       | ZNF32-AS2  | 0.558885973 | 1.32E-45  | postive |
| FBXW7     | ZNF32-AS2  | 0.44581214  | 1.11E-27  | postive |
| HELLS     | CFLAR-AS1  | 0.569563909 | 1.12E-47  | postive |
| TUBE1     | CFLAR-AS1  | 0.458203992 | 2.47E-29  | postive |
| ALOX12    | CFLAR-AS1  | 0.464265455 | 3.62E-30  | postive |
| GABPB1    | CFLAR-AS1  | 0.544371868 | 6.54E-43  | postive |
| ATG7      | CFLAR-AS1  | 0.453555871 | 1.05E-28  | postive |
| LINC00472 | CFLAR-AS1  | 0.586359184 | 4.35E-51  | postive |
| ATM       | CFLAR-AS1  | 0.754968779 | 1.78E-100 | postive |
| FBXW7     | CFLAR-AS1  | 0.491832875 | 3.54E-34  | postive |
| ALOX12    | AP003717.1 | 0.414876619 | 7.74E-24  | postive |
| ZNF419    | AP001462.1 | 0.429781117 | 1.22E-25  | postive |
| ALOX12    | AP001462.1 | 0.490584341 | 5.48E-34  | postive |
| TFAP2C    | AP001462.1 | 0.42213926  | 1.05E-24  | postive |
| HBA1      | AP001462.1 | 0.577849473 | 2.47E-49  | postive |
| EGLN2     | AP001462.1 | 0.486551379 | 2.22E-33  | postive |
| ZNF419    | LINC00893  | 0.572146086 | 3.46E-48  | postive |
| VEGFA     | LINC00893  | 0.431284934 | 7.95E-26  | postive |
| TUBE1     | LINC00893  | 0.575950547 | 5.97E-49  | postive |
| SETD1B    | LINC00893  | 0.470460163 | 4.89E-31  | postive |
| ALOX12    | LINC00893  | 0.632970282 | 1.10E-61  | postive |
| PHKG2     | LINC00893  | 0.529362725 | 2.94E-40  | postive |
| TAZ       | LINC00893  | 0.661456795 | 4.15E-69  | postive |
| TFAP2C    | AC022613.2 | 0.45412046  | 8.82E-29  | postive |
| HBA1      | AC022613.2 | 0.644766859 | 1.16E-64  | postive |
| FANCD2    | AL136531.1 | 0.439359744 | 7.60E-27  | postive |
| HELLS     | AL136531.1 | 0.551012389 | 3.97E-44  | postive |
| TUBE1     | AL136531.1 | 0.426079055 | 3.49E-25  | postive |
| ALOX12    | AL136531.1 | 0.589581186 | 9.13E-52  | postive |
| GABPB1    | AL136531.1 | 0.431739401 | 6.98E-26  | postive |
| DUOX1     | AL136531.1 | 0.410619221 | 2.44E-23  | postive |
| LINC00472 | AL136531.1 | 0.409349117 | 3.42E-23  | postive |

|           |            |             |          |         |
|-----------|------------|-------------|----------|---------|
| ATM       | AL136531.1 | 0.451417876 | 2.03E-28 | postive |
| FANCD2    | AC020913.3 | 0.411136214 | 2.12E-23 | postive |
| HELLS     | AC020913.3 | 0.438119242 | 1.09E-26 | postive |
| ALOX12    | AC020913.3 | 0.422937076 | 8.43E-25 | postive |
| TFAP2C    | AC020913.3 | 0.519569415 | 1.35E-38 | postive |
| HBA1      | AC020913.3 | 0.47390457  | 1.58E-31 | postive |
| DUOX1     | AC020913.3 | 0.460394526 | 1.24E-29 | postive |
| PML       | KIF1C-AS1  | 0.434995459 | 2.72E-26 | postive |
| BRD4      | KIF1C-AS1  | 0.414099796 | 9.56E-24 | postive |
| ZNF419    | KIF1C-AS1  | 0.414024936 | 9.75E-24 | postive |
| TUBE1     | KIF1C-AS1  | 0.416208394 | 5.39E-24 | postive |
| SETD1B    | KIF1C-AS1  | 0.404272161 | 1.31E-22 | postive |
| ALOX12    | KIF1C-AS1  | 0.545332391 | 4.38E-43 | postive |
| PHKG2     | KIF1C-AS1  | 0.573406326 | 1.94E-48 | postive |
| TAZ       | KIF1C-AS1  | 0.654435639 | 3.33E-67 | postive |
| FBXW7     | KIF1C-AS1  | 0.400857506 | 3.19E-22 | postive |
| HELLS     | AC073130.2 | 0.561826549 | 3.61E-46 | postive |
| TUBE1     | AC073130.2 | 0.437611955 | 1.27E-26 | postive |
| ALOX12    | AC073130.2 | 0.435926316 | 2.08E-26 | postive |
| GABPB1    | AC073130.2 | 0.512216551 | 2.19E-37 | postive |
| ATG7      | AC073130.2 | 0.417017044 | 4.32E-24 | postive |
| LINC00472 | AC073130.2 | 0.573797557 | 1.62E-48 | postive |
| ATM       | AC073130.2 | 0.697163444 | 1.20E-79 | postive |
| FBXW7     | AC073130.2 | 0.443988826 | 1.92E-27 | postive |
| FANCD2    | AP001628.1 | 0.42028992  | 1.76E-24 | postive |
| HELLS     | AP001628.1 | 0.503039626 | 6.48E-36 | postive |
| ALOX12    | AP001628.1 | 0.515397216 | 6.61E-38 | postive |
| TFAP2C    | AP001628.1 | 0.417688286 | 3.60E-24 | postive |
| DUOX1     | AP001628.1 | 0.412717309 | 1.39E-23 | postive |
| OXSR1     | AC097534.1 | 0.427323118 | 2.46E-25 | postive |
| ZNF419    | AC097534.1 | 0.413197546 | 1.22E-23 | postive |
| TUBE1     | AC097534.1 | 0.455852406 | 5.15E-29 | postive |
| ALOX12    | AC097534.1 | 0.452875417 | 1.29E-28 | postive |
| IREB2     | AC097534.1 | 0.430565162 | 9.77E-26 | postive |
| SP1       | AC097534.1 | 0.485336986 | 3.37E-33 | postive |
| GABPB1    | AC097534.1 | 0.452625082 | 1.40E-28 | postive |
| MAPK8     | AC097534.1 | 0.439249928 | 7.85E-27 | postive |
| PRKAA2    | AC097534.1 | 0.404058189 | 1.38E-22 | postive |
| ATM       | AC097534.1 | 0.564264493 | 1.22E-46 | postive |
| HELLS     | GEMIN7-AS1 | 0.461345107 | 9.18E-30 | postive |
| ZNF419    | GEMIN7-AS1 | 0.471490325 | 3.49E-31 | postive |
| TUBE1     | GEMIN7-AS1 | 0.531926842 | 1.06E-40 | postive |
| ALOX12    | GEMIN7-AS1 | 0.692653548 | 3.12E-78 | postive |
| PHKG2     | GEMIN7-AS1 | 0.424411335 | 5.58E-25 | postive |
| ATM       | GEMIN7-AS1 | 0.437940453 | 1.15E-26 | postive |
| TAZ       | GEMIN7-AS1 | 0.515600167 | 6.12E-38 | postive |
| HELLS     | AC023510.2 | 0.451190369 | 2.17E-28 | postive |
| TUBE1     | AC023510.2 | 0.659498231 | 1.43E-68 | postive |
| ALOX12    | AC023510.2 | 0.574575599 | 1.13E-48 | postive |
| GABPB1    | AC023510.2 | 0.51795425  | 2.50E-38 | postive |
| ATM       | AC023510.2 | 0.671518963 | 6.27E-72 | postive |
| FBXW7     | AC023510.2 | 0.470895658 | 4.24E-31 | postive |
| TAZ       | AC008438.1 | 0.419946554 | 1.93E-24 | postive |
| HBA1      | Z93930.2   | 0.45104628  | 2.27E-28 | postive |
| TUBE1     | AC009974.1 | 0.511179636 | 3.23E-37 | postive |
| ALOX12    | AC009974.1 | 0.465476161 | 2.46E-30 | postive |
| TAZ       | AC009974.1 | 0.475090839 | 1.07E-31 | postive |
| HELLS     | AL021707.1 | 0.411698083 | 1.83E-23 | postive |

|           |            |              |          |          |
|-----------|------------|--------------|----------|----------|
| ZNF419    | AL021707.1 | 0.550763758  | 4.42E-44 | postive  |
| VEGFA     | AL021707.1 | 0.400588408  | 3.42E-22 | postive  |
| TUBE1     | AL021707.1 | 0.587887836  | 2.08E-51 | postive  |
| ALOX12    | AL021707.1 | 0.564868257  | 9.33E-47 | postive  |
| GABPB1    | AL021707.1 | 0.455566691  | 5.63E-29 | postive  |
| PHKG2     | AL021707.1 | 0.42433824   | 5.70E-25 | postive  |
| LINC00472 | AL021707.1 | 0.417937217  | 3.36E-24 | postive  |
| ATM       | AL021707.1 | 0.496890103  | 5.93E-35 | postive  |
| TAZ       | AL021707.1 | 0.565581161  | 6.78E-47 | postive  |
| FBXW7     | AL021707.1 | 0.511705309  | 2.65E-37 | postive  |
| STAT3     | AC011374.2 | -0.437425659 | 1.34E-26 | negative |
| NOX1      | AC011374.2 | 0.570392946  | 7.71E-48 | postive  |
| PHKG2     | AC011374.2 | 0.490159161  | 6.35E-34 | postive  |
| BECN1     | AC011374.2 | -0.558527407 | 1.54E-45 | negative |
| TFAP2C    | AC022382.1 | 0.561894181  | 3.51E-46 | postive  |
| HBA1      | AC022382.1 | 0.497269913  | 5.18E-35 | postive  |
| DUOX1     | AC022382.1 | 0.403977368  | 1.41E-22 | postive  |
| FANCD2    | AC018766.1 | 0.417042073  | 4.29E-24 | postive  |
| HELLS     | AC018766.1 | 0.454480313  | 7.89E-29 | postive  |
| ZNF419    | AC018766.1 | 0.421394042  | 1.29E-24 | postive  |
| ALOX12    | AC018766.1 | 0.496396088  | 7.07E-35 | postive  |
| TFAP2C    | AC018766.1 | 0.50078971   | 1.46E-35 | postive  |
| HBA1      | AC018766.1 | 0.420488719  | 1.66E-24 | postive  |
| DUOX1     | AC018766.1 | 0.429480002  | 1.33E-25 | postive  |
| SLC2A12   | LINC01564  | 0.426171773  | 3.40E-25 | postive  |
| PHKG2     | AC007220.1 | 0.469957633  | 5.76E-31 | postive  |
| TAZ       | AC007220.1 | 0.547338268  | 1.89E-43 | postive  |
| HSPB1     | CHKB-DT    | 0.460631529  | 1.15E-29 | postive  |
| SLC2A8    | CHKB-DT    | 0.454321686  | 8.28E-29 | postive  |
| PHKG2     | CHKB-DT    | 0.412127027  | 1.63E-23 | postive  |
| HELLS     | AC025287.3 | 0.414731241  | 8.05E-24 | postive  |
| ZNF419    | AC025287.3 | 0.555678319  | 5.34E-45 | postive  |
| TUBE1     | AC025287.3 | 0.568355099  | 1.94E-47 | postive  |
| SETD1B    | AC025287.3 | 0.534214057  | 4.22E-41 | postive  |
| ALOX12    | AC025287.3 | 0.677615053  | 1.08E-73 | postive  |
| GABPB1    | AC025287.3 | 0.477703065  | 4.47E-32 | postive  |
| LINC00472 | AC025287.3 | 0.513973165  | 1.13E-37 | postive  |
| ATM       | AC025287.3 | 0.62403393   | 1.63E-59 | postive  |
| FBXW7     | AC025287.3 | 0.493626259  | 1.89E-34 | postive  |
| HELLS     | AC087276.1 | 0.54789829   | 1.49E-43 | postive  |
| ZNF419    | AC087276.1 | 0.437383559  | 1.36E-26 | postive  |
| TUBE1     | AC087276.1 | 0.469882223  | 5.91E-31 | postive  |
| ALOX12    | AC087276.1 | 0.521009939  | 7.72E-39 | postive  |
| GABPB1    | AC087276.1 | 0.559466447  | 1.02E-45 | postive  |
| LINC00472 | AC087276.1 | 0.678357573  | 6.54E-74 | postive  |
| ATM       | AC087276.1 | 0.621382277  | 6.97E-59 | postive  |
| FBXW7     | AC087276.1 | 0.532715237  | 7.71E-41 | postive  |
| LPIN1     | LINC01762  | 0.410168856  | 2.75E-23 | postive  |
| RPL8      | AC138207.2 | 0.534491592  | 3.77E-41 | postive  |
| HELLS     | AL354696.2 | 0.42660368   | 3.01E-25 | postive  |
| ALOX12    | AL354696.2 | 0.455168888  | 6.37E-29 | postive  |
| TFAP2C    | AL354696.2 | 0.443389821  | 2.30E-27 | postive  |
| HBA1      | AL354696.2 | 0.433636055  | 4.04E-26 | postive  |
| DUOX1     | AL354696.2 | 0.418945059  | 2.55E-24 | postive  |
| GCLC      | AGAP2-AS1  | -0.426976559 | 2.71E-25 | negative |
| TRIB3     | AGAP2-AS1  | 0.462704547  | 5.96E-30 | postive  |
| SLC2A6    | AGAP2-AS1  | 0.449367119  | 3.79E-28 | postive  |
| NCOA4     | AGAP2-AS1  | -0.439051509 | 8.32E-27 | negative |

|           |            |              |           |          |
|-----------|------------|--------------|-----------|----------|
| PRKAA2    | AGAP2-AS1  | -0.422253061 | 1.02E-24  | negative |
| GPX4      | RAB11B-AS1 | 0.499128203  | 2.66E-35  | postive  |
| RB1       | RAB11B-AS1 | -0.437431086 | 1.34E-26  | negative |
| HSPB1     | RAB11B-AS1 | 0.413468259  | 1.13E-23  | postive  |
| STAT3     | RAB11B-AS1 | -0.476085621 | 7.66E-32  | negative |
| OTUB1     | RAB11B-AS1 | 0.435394249  | 2.43E-26  | postive  |
| MAPK14    | RAB11B-AS1 | -0.477909097 | 4.17E-32  | negative |
| SLC2A8    | RAB11B-AS1 | 0.466822264  | 1.59E-30  | postive  |
| NRAS      | RAB11B-AS1 | -0.498762858 | 3.04E-35  | negative |
| HRAS      | RAB11B-AS1 | 0.554005243  | 1.10E-44  | postive  |
| NCOA4     | RAB11B-AS1 | -0.46209796  | 7.23E-30  | negative |
| PHKG2     | RAB11B-AS1 | 0.479210706  | 2.69E-32  | postive  |
| ATG4D     | RAB11B-AS1 | 0.425715308  | 3.87E-25  | postive  |
| BECN1     | RAB11B-AS1 | -0.506042888 | 2.16E-36  | negative |
| MAP1LC3A  | RAB11B-AS1 | 0.615330223  | 1.82E-57  | postive  |
| MAPK1     | RAB11B-AS1 | -0.519983915 | 1.15E-38  | negative |
| ANO6      | RAB11B-AS1 | -0.417349933 | 3.95E-24  | negative |
| EGLN2     | RAB11B-AS1 | 0.459475455  | 1.66E-29  | postive  |
| MTDH      | RAB11B-AS1 | -0.46762179  | 1.23E-30  | negative |
| SIRT1     | RAB11B-AS1 | -0.437349249 | 1.37E-26  | negative |
| BRD4      | AC009283.1 | 0.41796237   | 3.34E-24  | postive  |
| ZNF419    | AC009283.1 | 0.524307446  | 2.15E-39  | postive  |
| TUBE1     | AC009283.1 | 0.47599656   | 7.89E-32  | postive  |
| SETD1B    | AC009283.1 | 0.418081992  | 3.23E-24  | postive  |
| DRD4      | AC009283.1 | 0.407216528  | 6.03E-23  | postive  |
| ALOX12    | AC009283.1 | 0.558312666  | 1.70E-45  | postive  |
| NCOA4     | AC009283.1 | -0.448969104 | 4.28E-28  | negative |
| PHKG2     | AC009283.1 | 0.657657713  | 4.52E-68  | postive  |
| MAPK1     | AC009283.1 | -0.405856261 | 8.64E-23  | negative |
| TAZ       | AC009283.1 | 0.76644582   | 2.57E-105 | postive  |
| BRD4      | IGBP1-AS1  | 0.415730597  | 6.14E-24  | postive  |
| ZNF419    | IGBP1-AS1  | 0.578344992  | 1.96E-49  | postive  |
| TUBE1     | IGBP1-AS1  | 0.544875237  | 5.30E-43  | postive  |
| SETD1B    | IGBP1-AS1  | 0.452799883  | 1.33E-28  | postive  |
| ALOX12    | IGBP1-AS1  | 0.568925364  | 1.50E-47  | postive  |
| GABPB1    | IGBP1-AS1  | 0.469564472  | 6.55E-31  | postive  |
| LINC00472 | IGBP1-AS1  | 0.568842238  | 1.56E-47  | postive  |
| ATM       | IGBP1-AS1  | 0.457469599  | 3.11E-29  | postive  |
| TAZ       | IGBP1-AS1  | 0.493364249  | 2.07E-34  | postive  |
| FBXW7     | IGBP1-AS1  | 0.412123005  | 1.63E-23  | postive  |
| TRIB3     | AC016405.3 | 0.411108024  | 2.14E-23  | postive  |
| ZNF419    | Z94721.1   | 0.402158326  | 2.27E-22  | postive  |
| VEGFA     | Z94721.1   | 0.466474765  | 1.78E-30  | postive  |
| TUBE1     | Z94721.1   | 0.558259202  | 1.74E-45  | postive  |
| ALOX12    | Z94721.1   | 0.655353101  | 1.89E-67  | postive  |
| ATM       | Z94721.1   | 0.401395581  | 2.77E-22  | postive  |
| HELLS     | AC018926.3 | 0.464422194  | 3.45E-30  | postive  |
| KLHL24    | AC018926.3 | 0.485815573  | 2.86E-33  | postive  |
| TUBE1     | AC018926.3 | 0.478654672  | 3.25E-32  | postive  |
| ALOX12    | AC018926.3 | 0.404869776  | 1.12E-22  | postive  |
| IREB2     | AC018926.3 | 0.41729076   | 4.01E-24  | postive  |
| GABPB1    | AC018926.3 | 0.563040416  | 2.11E-46  | postive  |
| PIK3CA    | AC018926.3 | 0.416356266  | 5.18E-24  | postive  |
| MAPK8     | AC018926.3 | 0.423637887  | 6.93E-25  | postive  |
| LINC00472 | AC018926.3 | 0.846742437  | 2.66E-149 | postive  |
| ATM       | AC018926.3 | 0.674684443  | 7.70E-73  | postive  |
| FBXW7     | AC018926.3 | 0.481522981  | 1.23E-32  | postive  |
| CHMP6     | AL451085.2 | 0.417558095  | 3.73E-24  | postive  |

|           |            |             |           |         |
|-----------|------------|-------------|-----------|---------|
| HRAS      | AL451085.2 | 0.532766726 | 7.56E-41  | postive |
| TAZ       | AL451085.2 | 0.437383171 | 1.36E-26  | postive |
| PHKG2     | PPP4R3B-DT | 0.463642556 | 4.42E-30  | postive |
| TAZ       | PPP4R3B-DT | 0.480536341 | 1.72E-32  | postive |
| HELLS     | AC124283.2 | 0.483231971 | 6.91E-33  | postive |
| HELLS     | AC127024.5 | 0.576740613 | 4.14E-49  | postive |
| ZNF419    | AC127024.5 | 0.568382902 | 1.92E-47  | postive |
| TUBE1     | AC127024.5 | 0.651130752 | 2.52E-66  | postive |
| ALOX12    | AC127024.5 | 0.663175988 | 1.39E-69  | postive |
| GABPB1    | AC127024.5 | 0.609012086 | 5.10E-56  | postive |
| LINC00472 | AC127024.5 | 0.569796148 | 1.01E-47  | postive |
| ATM       | AC127024.5 | 0.66322695  | 1.35E-69  | postive |
| TAZ       | AC127024.5 | 0.426246463 | 3.33E-25  | postive |
| FBXW7     | AC127024.5 | 0.554186579 | 1.02E-44  | postive |
| HELLS     | AC010261.1 | 0.49344827  | 2.01E-34  | postive |
| KLHL24    | AC010261.1 | 0.481103772 | 1.42E-32  | postive |
| TUBE1     | AC010261.1 | 0.433967577 | 3.67E-26  | postive |
| ALOX12    | AC010261.1 | 0.4192716   | 2.33E-24  | postive |
| IREB2     | AC010261.1 | 0.434839905 | 2.85E-26  | postive |
| GABPB1    | AC010261.1 | 0.557575063 | 2.34E-45  | postive |
| PIK3CA    | AC010261.1 | 0.438812942 | 8.93E-27  | postive |
| MAPK8     | AC010261.1 | 0.430139567 | 1.10E-25  | postive |
| LINC00472 | AC010261.1 | 0.86902595  | 3.09E-166 | postive |
| ATM       | AC010261.1 | 0.658033719 | 3.57E-68  | postive |
| FBXW7     | AC010261.1 | 0.439455756 | 7.39E-27  | postive |
| FANCD2    | AC009961.1 | 0.401352365 | 2.80E-22  | postive |
| HELLS     | AC009961.1 | 0.455494584 | 5.76E-29  | postive |
| TFAP2C    | AC009961.1 | 0.489455221 | 8.12E-34  | postive |
| HBA1      | AC009961.1 | 0.457229097 | 3.35E-29  | postive |
| DUOX1     | AC009961.1 | 0.418800665 | 2.65E-24  | postive |
| BRD4      | AL162586.1 | 0.498738508 | 3.06E-35  | postive |
| ZNF419    | AL162586.1 | 0.6043704   | 5.63E-55  | postive |
| VEGFA     | AL162586.1 | 0.500551602 | 1.60E-35  | postive |
| TUBE1     | AL162586.1 | 0.563158202 | 2.00E-46  | postive |
| SETD1B    | AL162586.1 | 0.504232969 | 4.20E-36  | postive |
| DRD4      | AL162586.1 | 0.425608776 | 3.99E-25  | postive |
| ALOX12    | AL162586.1 | 0.636189974 | 1.74E-62  | postive |
| GABPB1    | AL162586.1 | 0.449492029 | 3.65E-28  | postive |
| TAZ       | AL162586.1 | 0.591324519 | 3.90E-52  | postive |
| FBXW7     | AL162586.1 | 0.439097052 | 8.21E-27  | postive |
| HELLS     | AP005136.3 | 0.555593103 | 5.54E-45  | postive |
| ZNF419    | AP005136.3 | 0.408154494 | 4.70E-23  | postive |
| TUBE1     | AP005136.3 | 0.512250684 | 2.16E-37  | postive |
| ALOX12    | AP005136.3 | 0.433226078 | 4.55E-26  | postive |
| GABPB1    | AP005136.3 | 0.59955663  | 6.51E-54  | postive |
| MAPK8     | AP005136.3 | 0.438567438 | 9.60E-27  | postive |
| LINC00472 | AP005136.3 | 0.743895548 | 4.71E-96  | postive |
| ATM       | AP005136.3 | 0.661861215 | 3.21E-69  | postive |
| FBXW7     | AP005136.3 | 0.473806343 | 1.63E-31  | postive |
| ZNF419    | AC006213.5 | 0.434558421 | 3.09E-26  | postive |
| KLHL24    | AC006213.5 | 0.497008781 | 5.68E-35  | postive |
| IREB2     | AC006213.5 | 0.493997173 | 1.65E-34  | postive |
| GABPB1    | AC006213.5 | 0.509951954 | 5.10E-37  | postive |
| PIK3CA    | AC006213.5 | 0.460794095 | 1.09E-29  | postive |
| KRAS      | AC006213.5 | 0.408401901 | 4.41E-23  | postive |
| MAPK8     | AC006213.5 | 0.499302044 | 2.50E-35  | postive |
| LINC00472 | AC006213.5 | 0.685736004 | 4.13E-76  | postive |
| PRKAA1    | AC006213.5 | 0.432142265 | 6.21E-26  | postive |



|           |            |             |          |         |
|-----------|------------|-------------|----------|---------|
| ATM       | AC006213.5 | 0.550380035 | 5.20E-44 | postive |
| ZNF419    | AP000892.3 | 0.536005993 | 2.04E-41 | postive |
| ALOX12    | AP000892.3 | 0.478830809 | 3.06E-32 | postive |
| PHKG2     | AP000892.3 | 0.427729155 | 2.19E-25 | postive |
| EGLN2     | AP000892.3 | 0.467281432 | 1.37E-30 | postive |
| TAZ       | AP000892.3 | 0.573835257 | 1.59E-48 | postive |
| HELLS     | STARD4-AS1 | 0.445883217 | 1.09E-27 | postive |
| ZNF419    | STARD4-AS1 | 0.482491301 | 8.89E-33 | postive |
| VEGFA     | STARD4-AS1 | 0.419677034 | 2.08E-24 | postive |
| TUBE1     | STARD4-AS1 | 0.579374101 | 1.21E-49 | postive |
| SETD1B    | STARD4-AS1 | 0.413355079 | 1.17E-23 | postive |
| ALOX12    | STARD4-AS1 | 0.619561026 | 1.88E-58 | postive |
| IREB2     | STARD4-AS1 | 0.407972346 | 4.94E-23 | postive |
| SP1       | STARD4-AS1 | 0.410683873 | 2.40E-23 | postive |
| GABPB1    | STARD4-AS1 | 0.505803243 | 2.36E-36 | postive |
| ZEB1      | STARD4-AS1 | 0.422045826 | 1.08E-24 | postive |
| MAPK8     | STARD4-AS1 | 0.48977503  | 7.26E-34 | postive |
| LINC00472 | STARD4-AS1 | 0.408376365 | 4.44E-23 | postive |
| ATM       | STARD4-AS1 | 0.693471948 | 1.73E-78 | postive |
| FBXW7     | STARD4-AS1 | 0.49882283  | 2.97E-35 | postive |
| CHAC1     | AL049629.1 | 0.585807287 | 5.67E-51 | postive |
| DDIT3     | AL049629.1 | 0.475434621 | 9.51E-32 | postive |
| ATG4D     | AL049629.1 | 0.463387425 | 4.80E-30 | postive |
| MAP1LC3A  | AL049629.1 | 0.534643854 | 3.55E-41 | postive |
| WIP1      | AL049629.1 | 0.402312364 | 2.18E-22 | postive |
| FANCD2    | AC005776.2 | 0.41423831  | 9.21E-24 | postive |
| HELLS     | AC005776.2 | 0.400247458 | 3.73E-22 | postive |
| ZNF419    | AC005776.2 | 0.401094654 | 3.00E-22 | postive |
| ALOX12    | AC005776.2 | 0.488392146 | 1.17E-33 | postive |
| TFAP2C    | AC005776.2 | 0.487356559 | 1.68E-33 | postive |
| HBA1      | AC005776.2 | 0.435334828 | 2.47E-26 | postive |
| DUOX1     | AC005776.2 | 0.41520399  | 7.08E-24 | postive |
| PHKG2     | AC015660.3 | 0.521206808 | 7.16E-39 | postive |
| TAZ       | AC015660.3 | 0.617974733 | 4.42E-58 | postive |
| HELLS     | AC112722.1 | 0.468458293 | 9.38E-31 | postive |
| ZNF419    | AC112722.1 | 0.529278307 | 3.04E-40 | postive |
| TUBE1     | AC112722.1 | 0.539186528 | 5.59E-42 | postive |
| ALOX12    | AC112722.1 | 0.559714884 | 9.17E-46 | postive |
| GABPB1    | AC112722.1 | 0.471962392 | 2.99E-31 | postive |
| ATM       | AC112722.1 | 0.557551721 | 2.36E-45 | postive |
| FBXW7     | AC112722.1 | 0.528961517 | 3.45E-40 | postive |
| ALOX12    | SNAI3-AS1  | 0.42178078  | 1.16E-24 | postive |
| HBA1      | SNAI3-AS1  | 0.580812086 | 6.13E-50 | postive |
| EGLN2     | SNAI3-AS1  | 0.473358019 | 1.89E-31 | postive |
| ATM       | AC023137.1 | 0.456946225 | 3.66E-29 | postive |
| FANCD2    | AC138393.2 | 0.43575782  | 2.18E-26 | postive |
| HELLS     | AC138393.2 | 0.615318497 | 1.83E-57 | postive |
| ZNF419    | AC138393.2 | 0.431470811 | 7.53E-26 | postive |
| TUBE1     | AC138393.2 | 0.496570319 | 6.64E-35 | postive |
| ALOX12    | AC138393.2 | 0.554591359 | 8.54E-45 | postive |
| GABPB1    | AC138393.2 | 0.570019461 | 9.13E-48 | postive |
| ATG7      | AC138393.2 | 0.417336475 | 3.96E-24 | postive |
| MAPK8     | AC138393.2 | 0.400830345 | 3.21E-22 | postive |
| LINC00472 | AC138393.2 | 0.599828976 | 5.68E-54 | postive |
| ATM       | AC138393.2 | 0.688083833 | 7.99E-77 | postive |
| FBXW7     | AC138393.2 | 0.545397729 | 4.26E-43 | postive |
| HELLS     | AC079921.1 | 0.491612325 | 3.82E-34 | postive |
| ZNF419    | AC079921.1 | 0.430661243 | 9.50E-26 | postive |

|           |            |             |           |         |
|-----------|------------|-------------|-----------|---------|
| TUBE1     | AC079921.1 | 0.54417673  | 7.10E-43  | postive |
| ALOX12    | AC079921.1 | 0.528034868 | 4.97E-40  | postive |
| IREB2     | AC079921.1 | 0.407993479 | 4.91E-23  | postive |
| GABPB1    | AC079921.1 | 0.627122952 | 2.95E-60  | postive |
| ZEB1      | AC079921.1 | 0.408994447 | 3.76E-23  | postive |
| MAPK8     | AC079921.1 | 0.488124456 | 1.29E-33  | postive |
| LINC00472 | AC079921.1 | 0.633937215 | 6.34E-62  | postive |
| ATM       | AC079921.1 | 0.72727708  | 7.89E-90  | postive |
| FBXW7     | AC079921.1 | 0.54471659  | 5.67E-43  | postive |
| HELLS     | AL049840.6 | 0.506176263 | 2.06E-36  | postive |
| KLHL24    | AL049840.6 | 0.47239473  | 2.60E-31  | postive |
| TUBE1     | AL049840.6 | 0.459125335 | 1.85E-29  | postive |
| ALOX12    | AL049840.6 | 0.409764066 | 3.07E-23  | postive |
| IREB2     | AL049840.6 | 0.458035245 | 2.60E-29  | postive |
| GABPB1    | AL049840.6 | 0.606522484 | 1.86E-55  | postive |
| PIK3CA    | AL049840.6 | 0.471376719 | 3.62E-31  | postive |
| ATG7      | AL049840.6 | 0.429874989 | 1.19E-25  | postive |
| MAPK8     | AL049840.6 | 0.472479494 | 2.52E-31  | postive |
| LINC00472 | AL049840.6 | 0.844121278 | 1.73E-147 | postive |
| ATM       | AL049840.6 | 0.721234152 | 1.12E-87  | postive |
| FBXW7     | AL049840.6 | 0.495162638 | 1.10E-34  | postive |
| ZNF419    | ZFHX2-AS1  | 0.452002519 | 1.69E-28  | postive |
| ALOX12    | ZFHX2-AS1  | 0.562299083 | 2.93E-46  | postive |
| TFAP2C    | ZFHX2-AS1  | 0.474128121 | 1.47E-31  | postive |
| HBA1      | ZFHX2-AS1  | 0.469737912 | 6.19E-31  | postive |
| DUOX1     | ZFHX2-AS1  | 0.400597002 | 3.41E-22  | postive |
| HELLS     | MAST4-AS1  | 0.539665919 | 4.59E-42  | postive |
| GABPB1    | MAST4-AS1  | 0.507875459 | 1.10E-36  | postive |
| ATG7      | MAST4-AS1  | 0.451850201 | 1.77E-28  | postive |
| LINC00472 | MAST4-AS1  | 0.511238225 | 3.16E-37  | postive |
| ATM       | MAST4-AS1  | 0.701194176 | 6.16E-81  | postive |
| FBXW7     | MAST4-AS1  | 0.443216381 | 2.42E-27  | postive |
| NCF2      | AC026369.3 | 0.406506634 | 7.28E-23  | postive |
| ISCU      | AC006547.1 | 0.503010216 | 6.55E-36  | postive |
| DDIT3     | AC006547.1 | 0.433434926 | 4.28E-26  | postive |
| KLHL24    | AC006547.1 | 0.400243445 | 3.73E-22  | postive |
| SLC2A12   | AC006547.1 | 0.41637436  | 5.15E-24  | postive |
| TFAP2C    | AC006547.1 | 0.400980437 | 3.09E-22  | postive |
| ATG4D     | AC006547.1 | 0.457560434 | 3.02E-29  | postive |
| GABARAPL1 | AC006547.1 | 0.58392086  | 1.40E-50  | postive |
| WIP1      | AC006547.1 | 0.489698954 | 7.46E-34  | postive |
| LPIN1     | AC006547.1 | 0.677194727 | 1.43E-73  | postive |
| TFAP2C    | AL031289.1 | 0.582240453 | 3.12E-50  | postive |
| HBA1      | AL031289.1 | 0.521587567 | 6.18E-39  | postive |
| HELLS     | AL162385.2 | 0.518187206 | 2.28E-38  | postive |
| TUBE1     | AL162385.2 | 0.507681717 | 1.18E-36  | postive |
| ALOX12    | AL162385.2 | 0.425692057 | 3.89E-25  | postive |
| GABPB1    | AL162385.2 | 0.578149179 | 2.14E-49  | postive |
| MAPK8     | AL162385.2 | 0.423710955 | 6.79E-25  | postive |
| LINC00472 | AL162385.2 | 0.780308378 | 1.51E-111 | postive |
| ATM       | AL162385.2 | 0.672131555 | 4.19E-72  | postive |
| FBXW7     | AL162385.2 | 0.503649566 | 5.19E-36  | postive |
| RB1       | AC005034.3 | 0.467057635 | 1.48E-30  | postive |
| ACSL3     | AC005034.3 | 0.413023363 | 1.28E-23  | postive |
| KLHL24    | AC005034.3 | 0.449098659 | 4.12E-28  | postive |
| IREB2     | AC005034.3 | 0.466712241 | 1.65E-30  | postive |
| PIK3CA    | AC005034.3 | 0.523976712 | 2.44E-39  | postive |
| KRAS      | AC005034.3 | 0.564561236 | 1.07E-46  | postive |

|           |            |              |           |          |
|-----------|------------|--------------|-----------|----------|
| SLC38A1   | AC005034.3 | 0.439856231  | 6.57E-27  | postive  |
| MAPK9     | AC005034.3 | 0.438662512  | 9.33E-27  | postive  |
| LINC00472 | AC005034.3 | 0.517835037  | 2.61E-38  | postive  |
| PRKAA2    | AC005034.3 | 0.429694178  | 1.25E-25  | postive  |
| PRKAA1    | AC005034.3 | 0.466060086  | 2.04E-30  | postive  |
| TGFBR1    | AC005034.3 | 0.459013422  | 1.92E-29  | postive  |
| BACH1     | AC005034.3 | 0.466439257  | 1.80E-30  | postive  |
| HELLS     | AC068987.2 | 0.49405893   | 1.62E-34  | postive  |
| TUBE1     | AC068987.2 | 0.515137128  | 7.29E-38  | postive  |
| ALOX12    | AC068987.2 | 0.636543208  | 1.42E-62  | postive  |
| GABPB1    | AC068987.2 | 0.426410609  | 3.18E-25  | postive  |
| ATM       | AC068987.2 | 0.623537555  | 2.14E-59  | postive  |
| FBXW7     | AC068987.2 | 0.412291541  | 1.56E-23  | postive  |
| HSPB1     | AL035071.1 | 0.434411904  | 3.23E-26  | postive  |
| STAT3     | AL035071.1 | -0.436506466 | 1.75E-26  | negative |
| MAPK14    | AL035071.1 | -0.519159798 | 1.57E-38  | negative |
| NOX1      | AL035071.1 | 0.520159672  | 1.07E-38  | postive  |
| NRAS      | AL035071.1 | -0.452505042 | 1.45E-28  | negative |
| HRAS      | AL035071.1 | 0.407165574  | 6.11E-23  | postive  |
| NCOA4     | AL035071.1 | -0.577849912 | 2.47E-49  | negative |
| PHKG2     | AL035071.1 | 0.558872858  | 1.33E-45  | postive  |
| BECN1     | AL035071.1 | -0.596681853 | 2.76E-53  | negative |
| MAPK1     | AL035071.1 | -0.46992277  | 5.83E-31  | negative |
| ANO6      | AL035071.1 | -0.447744772 | 6.21E-28  | negative |
| TAZ       | AL035071.1 | 0.522206305  | 4.86E-39  | postive  |
| MTDH      | AL035071.1 | -0.463496816 | 4.63E-30  | negative |
| NCOA4     | AC010331.1 | -0.425350121 | 4.29E-25  | negative |
| PHKG2     | AC010331.1 | 0.597486876  | 1.84E-53  | postive  |
| ULK1      | AC010331.1 | 0.411934087  | 1.71E-23  | postive  |
| TAZ       | AC010331.1 | 0.66788386   | 6.74E-71  | postive  |
| ATG4D     | LMO7-AS1   | 0.407360085  | 5.81E-23  | postive  |
| GABARAPL2 | LMO7-AS1   | 0.404519985  | 1.23E-22  | postive  |
| ALOX12    | AC012368.1 | 0.405913781  | 8.51E-23  | postive  |
| TAZ       | AC012368.1 | 0.56437162   | 1.17E-46  | postive  |
| ZNF419    | AC092574.1 | 0.42085064   | 1.50E-24  | postive  |
| TUBE1     | AC092574.1 | 0.43789667   | 1.17E-26  | postive  |
| GABPB1    | AC092574.1 | 0.444606468  | 1.60E-27  | postive  |
| LINC00472 | AC092574.1 | 0.610171661  | 2.78E-56  | postive  |
| ZNF419    | AC073655.2 | 0.429889113  | 1.18E-25  | postive  |
| TUBE1     | AC073655.2 | 0.512386696  | 2.05E-37  | postive  |
| ALOX12    | AC073655.2 | 0.522770454  | 3.91E-39  | postive  |
| PHKG2     | AC073655.2 | 0.479879013  | 2.15E-32  | postive  |
| TAZ       | AC073655.2 | 0.630670902  | 4.04E-61  | postive  |
| SLC3A2    | AC010501.2 | 0.448363957  | 5.14E-28  | postive  |
| FH        | AC010501.2 | 0.448227266  | 5.36E-28  | postive  |
| ISCU      | AC010501.2 | 0.676423946  | 2.41E-73  | postive  |
| ACSL3     | AC010501.2 | 0.401398357  | 2.77E-22  | postive  |
| DDIT3     | AC010501.2 | 0.475800992  | 8.42E-32  | postive  |
| KLHL24    | AC010501.2 | 0.444621126  | 1.59E-27  | postive  |
| SLC2A8    | AC010501.2 | 0.430289842  | 1.06E-25  | postive  |
| CS        | AC010501.2 | 0.449706828  | 3.42E-28  | postive  |
| GOT1      | AC010501.2 | 0.452270608  | 1.56E-28  | postive  |
| ATG4D     | AC010501.2 | 0.601178154  | 2.87E-54  | postive  |
| MAP1LC3A  | AC010501.2 | 0.440158798  | 6.00E-27  | postive  |
| GABARAPL2 | AC010501.2 | 0.462356563  | 6.66E-30  | postive  |
| GABARAPL1 | AC010501.2 | 0.772173473  | 7.75E-108 | postive  |
| WIP1      | AC010501.2 | 0.413411046  | 1.15E-23  | postive  |
| LPIN1     | AC010501.2 | 0.609691009  | 3.58E-56  | postive  |

|           |            |             |          |         |
|-----------|------------|-------------|----------|---------|
| FANCD2    | AL049780.2 | 0.436509401 | 1.75E-26 | postive |
| HELLS     | AL049780.2 | 0.558966564 | 1.27E-45 | postive |
| ZNF419    | AL049780.2 | 0.423169452 | 7.90E-25 | postive |
| TUBE1     | AL049780.2 | 0.453891302 | 9.46E-29 | postive |
| ALOX12    | AL049780.2 | 0.548372876 | 1.22E-43 | postive |
| GABPB1    | AL049780.2 | 0.517873397 | 2.58E-38 | postive |
| MAPK8     | AL049780.2 | 0.413244178 | 1.20E-23 | postive |
| LINC00472 | AL049780.2 | 0.507857568 | 1.11E-36 | postive |
| ATM       | AL049780.2 | 0.534589934 | 3.63E-41 | postive |
| FBXW7     | AL049780.2 | 0.421901269 | 1.12E-24 | postive |
| HELLS     | AC010320.3 | 0.50655677  | 1.79E-36 | postive |
| ZNF419    | AC010320.3 | 0.544611253 | 5.92E-43 | postive |
| KLHL24    | AC010320.3 | 0.401019235 | 3.06E-22 | postive |
| TUBE1     | AC010320.3 | 0.527786092 | 5.49E-40 | postive |
| ALOX12    | AC010320.3 | 0.563858888 | 1.46E-46 | postive |
| GABPB1    | AC010320.3 | 0.548763548 | 1.03E-43 | postive |
| LINC00472 | AC010320.3 | 0.634393321 | 4.88E-62 | postive |
| ATM       | AC010320.3 | 0.6615554   | 3.90E-69 | postive |
| FBXW7     | AC010320.3 | 0.530611162 | 1.79E-40 | postive |
| SETD1B    | AC026471.1 | 0.403185097 | 1.74E-22 | postive |
| ALOX12    | AC026471.1 | 0.528516748 | 4.11E-40 | postive |
| ATM       | AC026471.1 | 0.463908126 | 4.06E-30 | postive |
| TFAP2C    | AC107057.1 | 0.431155226 | 8.25E-26 | postive |
| HBA1      | AC107057.1 | 0.543655121 | 8.82E-43 | postive |
| FANCD2    | AC004076.2 | 0.444605246 | 1.60E-27 | postive |
| HELLS     | AC004076.2 | 0.580823338 | 6.09E-50 | postive |
| ZNF419    | AC004076.2 | 0.643872955 | 1.97E-64 | postive |
| TUBE1     | AC004076.2 | 0.494369297 | 1.45E-34 | postive |
| ALOX12    | AC004076.2 | 0.571389283 | 4.89E-48 | postive |
| GABPB1    | AC004076.2 | 0.553679523 | 1.27E-44 | postive |
| LINC00472 | AC004076.2 | 0.502725386 | 7.27E-36 | postive |
| ATM       | AC004076.2 | 0.49716353  | 5.38E-35 | postive |
| FBXW7     | AC004076.2 | 0.492942802 | 2.40E-34 | postive |
| ISCU      | AC012555.1 | 0.463234717 | 5.03E-30 | postive |
| ACSL3     | AC012555.1 | 0.410060312 | 2.83E-23 | postive |
| KLHL24    | AC012555.1 | 0.50601772  | 2.18E-36 | postive |
| CS        | AC012555.1 | 0.414204725 | 9.29E-24 | postive |
| GABARAPL1 | AC012555.1 | 0.474204091 | 1.43E-31 | postive |
| WIP1      | AC012555.1 | 0.404089643 | 1.37E-22 | postive |
| LPIN1     | AC012555.1 | 0.412578997 | 1.44E-23 | postive |
| JDP2      | AL049871.1 | 0.402035089 | 2.35E-22 | postive |
| HIC1      | AL049871.1 | 0.428795299 | 1.62E-25 | postive |
| ZEB1      | AL049871.1 | 0.58288041  | 2.30E-50 | postive |
| EPAS1     | AL049871.1 | 0.505063044 | 3.10E-36 | postive |
| HELLS     | AC011978.1 | 0.435750763 | 2.19E-26 | postive |
| TFAP2C    | AC011978.1 | 0.521739651 | 5.83E-39 | postive |
| NOX1      | AC011978.1 | 0.462056255 | 7.33E-30 | postive |
| ISCU      | LINC00706  | 0.552386874 | 2.21E-44 | postive |
| TMBIM4    | LINC00706  | 0.484277822 | 4.84E-33 | postive |
| CHMP5     | LINC00706  | 0.419091894 | 2.45E-24 | postive |
| DDIT3     | LINC00706  | 0.404653768 | 1.18E-22 | postive |
| GOT1      | LINC00706  | 0.40416007  | 1.35E-22 | postive |
| MAP1LC3A  | LINC00706  | 0.408154546 | 4.70E-23 | postive |
| GABARAPL2 | LINC00706  | 0.44086651  | 4.87E-27 | postive |
| TSC22D3   | LINC01704  | 0.407947643 | 4.97E-23 | postive |
| ZEB1      | LINC01704  | 0.504155566 | 4.32E-36 | postive |
| EPAS1     | LINC01704  | 0.547001237 | 2.17E-43 | postive |
| HELLS     | AC009996.1 | 0.536800842 | 1.48E-41 | postive |

|           |            |             |           |         |
|-----------|------------|-------------|-----------|---------|
| TUBE1     | AC009996.1 | 0.409061341 | 3.70E-23  | postive |
| ALOX12    | AC009996.1 | 0.486655145 | 2.14E-33  | postive |
| GABPB1    | AC009996.1 | 0.510094215 | 4.84E-37  | postive |
| LINC00472 | AC009996.1 | 0.658599887 | 2.51E-68  | postive |
| ATM       | AC009996.1 | 0.560195259 | 7.42E-46  | postive |
| FBXW7     | AC009996.1 | 0.472982348 | 2.14E-31  | postive |
| HELLS     | AC010245.2 | 0.434602781 | 3.05E-26  | postive |
| ZNF419    | AC010245.2 | 0.525020208 | 1.63E-39  | postive |
| TUBE1     | AC010245.2 | 0.59068792  | 5.32E-52  | postive |
| ALOX12    | AC010245.2 | 0.490306498 | 6.04E-34  | postive |
| GABPB1    | AC010245.2 | 0.488118422 | 1.29E-33  | postive |
| PHKG2     | AC010245.2 | 0.429536684 | 1.31E-25  | postive |
| ATM       | AC010245.2 | 0.451601581 | 1.92E-28  | postive |
| TAZ       | AC010245.2 | 0.555814096 | 5.03E-45  | postive |
| FBXW7     | AC010245.2 | 0.476534702 | 6.60E-32  | postive |
| HELLS     | AL358072.1 | 0.417246151 | 4.06E-24  | postive |
| ZNF419    | AL358072.1 | 0.534432507 | 3.87E-41  | postive |
| TUBE1     | AL358072.1 | 0.553923399 | 1.14E-44  | postive |
| ALOX12    | AL358072.1 | 0.46263316  | 6.10E-30  | postive |
| GABPB1    | AL358072.1 | 0.521884819 | 5.51E-39  | postive |
| PHKG2     | AL358072.1 | 0.457004454 | 3.60E-29  | postive |
| LINC00472 | AL358072.1 | 0.507147195 | 1.44E-36  | postive |
| ATM       | AL358072.1 | 0.452308234 | 1.54E-28  | postive |
| TAZ       | AL358072.1 | 0.513881812 | 1.17E-37  | postive |
| FBXW7     | AL358072.1 | 0.438423242 | 1.00E-26  | postive |
| TUBE1     | GK-AS1     | 0.555569216 | 5.60E-45  | postive |
| ALOX12    | GK-AS1     | 0.582709173 | 2.49E-50  | postive |
| LINC00472 | GK-AS1     | 0.417940289 | 3.36E-24  | postive |
| ATM       | GK-AS1     | 0.520282565 | 1.02E-38  | postive |
| HELLS     | RASGRP3-AS | 0.403293479 | 1.69E-22  | postive |
| ZNF419    | RASGRP3-AS | 0.413141731 | 1.24E-23  | postive |
| TUBE1     | RASGRP3-AS | 0.505734297 | 2.42E-36  | postive |
| ALOX12    | RASGRP3-AS | 0.43374243  | 3.92E-26  | postive |
| PHKG2     | RASGRP3-AS | 0.507492191 | 1.27E-36  | postive |
| LINC00472 | RASGRP3-AS | 0.490671051 | 5.32E-34  | postive |
| TAZ       | RASGRP3-AS | 0.518971119 | 1.69E-38  | postive |
| FBXW7     | RASGRP3-AS | 0.408675034 | 4.10E-23  | postive |
| HELLS     | AL157392.3 | 0.51833466  | 2.16E-38  | postive |
| ZNF419    | AL157392.3 | 0.544516258 | 6.16E-43  | postive |
| VEGFA     | AL157392.3 | 0.406729113 | 6.86E-23  | postive |
| TUBE1     | AL157392.3 | 0.627451992 | 2.46E-60  | postive |
| SETD1B    | AL157392.3 | 0.429015518 | 1.52E-25  | postive |
| ALOX12    | AL157392.3 | 0.666679018 | 1.47E-70  | postive |
| GABPB1    | AL157392.3 | 0.616996527 | 7.47E-58  | postive |
| ZEB1      | AL157392.3 | 0.409675499 | 3.14E-23  | postive |
| MAPK8     | AL157392.3 | 0.51262677  | 1.88E-37  | postive |
| LINC00472 | AL157392.3 | 0.623397664 | 2.31E-59  | postive |
| ATM       | AL157392.3 | 0.768781489 | 2.46E-106 | postive |
| FBXW7     | AL157392.3 | 0.579216773 | 1.30E-49  | postive |
| LINC00472 | AL137024.1 | 0.443121487 | 2.49E-27  | postive |
| FBXW7     | AL137024.1 | 0.401313928 | 2.83E-22  | postive |
| GPX4      | ATXN2-AS   | 0.426955547 | 2.73E-25  | postive |
| HSF1      | ATXN2-AS   | 0.451229829 | 2.15E-28  | postive |
| PHKG2     | ATXN2-AS   | 0.43027426  | 1.06E-25  | postive |
| KLHL24    | AC005753.1 | 0.4658808   | 2.16E-30  | postive |
| GABPB1    | AC005753.1 | 0.431411365 | 7.66E-26  | postive |
| LINC00472 | AC005753.1 | 0.793943316 | 3.89E-118 | postive |
| MUC1      | ZNF350-AS1 | 0.425246302 | 4.41E-25  | postive |

|           |            |              |          |          |
|-----------|------------|--------------|----------|----------|
| JDP2      | LINC01537  | 0.686865013  | 1.88E-76 | postive  |
| EIF2S1    | LINC01537  | 0.482572505  | 8.65E-33 | postive  |
| ZEB1      | LINC01537  | 0.489087085  | 9.23E-34 | postive  |
| EPAS1     | LINC01537  | 0.513159503  | 1.54E-37 | postive  |
| SLC2A6    | AC027575.2 | 0.423110453  | 8.03E-25 | postive  |
| IREB2     | AC027575.2 | -0.424419795 | 5.57E-25 | negative |
| NOX1      | AC027575.2 | 0.420700225  | 1.57E-24 | postive  |
| PIK3CA    | AC027575.2 | -0.423937095 | 6.37E-25 | negative |
| LPCAT3    | AC027575.2 | -0.412682588 | 1.40E-23 | negative |
| HRAS      | AC027575.2 | 0.421283878  | 1.33E-24 | postive  |
| NCOA4     | AC027575.2 | -0.476871486 | 5.90E-32 | negative |
| PHKG2     | AC027575.2 | 0.485818004  | 2.85E-33 | postive  |
| BECN1     | AC027575.2 | -0.451521896 | 1.96E-28 | negative |
| MAPK1     | AC027575.2 | -0.437229214 | 1.42E-26 | negative |
| ANO6      | AC027575.2 | -0.408251568 | 4.59E-23 | negative |
| TAZ       | AC027575.2 | 0.487313996  | 1.70E-33 | postive  |
| MTDH      | AC027575.2 | -0.454981567 | 6.75E-29 | negative |
| ATM       | AC096541.1 | 0.434771531  | 2.91E-26 | postive  |
| ATM       | AL357033.3 | 0.51337245   | 1.42E-37 | postive  |
| ZNF419    | AC025162.2 | 0.437442433  | 1.33E-26 | postive  |
| ALOX12    | AC025162.2 | 0.455755493  | 5.31E-29 | postive  |
| HBA1      | AC025162.2 | 0.55343289   | 1.41E-44 | postive  |
| HRAS      | AC025162.2 | 0.442206695  | 3.27E-27 | postive  |
| EGLN2     | AC025162.2 | 0.55799648   | 1.95E-45 | postive  |
| TAZ       | AC025162.2 | 0.475454545  | 9.45E-32 | postive  |
| ALOX12    | AL512306.2 | 0.424155648  | 5.99E-25 | postive  |
| TFAP2C    | AL512306.2 | 0.474025207  | 1.52E-31 | postive  |
| HBA1      | AL512306.2 | 0.434460038  | 3.18E-26 | postive  |
| ZNF419    | JPX        | 0.421739311  | 1.18E-24 | postive  |
| TUBE1     | JPX        | 0.426661368  | 2.96E-25 | postive  |
| ZNF419    | AC008760.1 | 0.487979033  | 1.35E-33 | postive  |
| VEGFA     | AC008760.1 | 0.562850863  | 2.29E-46 | postive  |
| TUBE1     | AC008760.1 | 0.608382251  | 7.08E-56 | postive  |
| SETD1B    | AC008760.1 | 0.454353541  | 8.20E-29 | postive  |
| ALOX12    | AC008760.1 | 0.598886321  | 9.13E-54 | postive  |
| PHKG2     | AC008760.1 | 0.427909957  | 2.08E-25 | postive  |
| TAZ       | AC008760.1 | 0.61967539   | 1.76E-58 | postive  |
| HELLS     | AC093157.2 | 0.585659767  | 6.09E-51 | postive  |
| ZNF419    | AC093157.2 | 0.419014748  | 2.50E-24 | postive  |
| TUBE1     | AC093157.2 | 0.521148405  | 7.32E-39 | postive  |
| ALOX12    | AC093157.2 | 0.488595372  | 1.09E-33 | postive  |
| GABPB1    | AC093157.2 | 0.620033555  | 1.45E-58 | postive  |
| ATG7      | AC093157.2 | 0.425206215  | 4.46E-25 | postive  |
| MAPK8     | AC093157.2 | 0.406124099  | 8.05E-23 | postive  |
| LINC00472 | AC093157.2 | 0.669446618  | 2.44E-71 | postive  |
| ATM       | AC093157.2 | 0.722841598  | 3.03E-88 | postive  |
| FBXW7     | AC093157.2 | 0.543463337  | 9.55E-43 | postive  |
| ZNF419    | AL136295.2 | 0.472455759  | 2.54E-31 | postive  |
| TUBE1     | AL136295.2 | 0.452788103  | 1.33E-28 | postive  |
| ALOX12    | AL136295.2 | 0.546709497  | 2.46E-43 | postive  |
| PHKG2     | AL136295.2 | 0.445001992  | 1.42E-27 | postive  |
| TAZ       | AL136295.2 | 0.590978937  | 4.62E-52 | postive  |
| HSF1      | ZNNT1      | 0.424728869  | 5.10E-25 | postive  |
| PHKG2     | ZNNT1      | 0.471692663  | 3.27E-31 | postive  |
| TAZ       | ZNNT1      | 0.495176711  | 1.09E-34 | postive  |
| ENPP2     | KCNJ2-AS1  | 0.52167601   | 5.97E-39 | postive  |
| SLC1A4    | KCNJ2-AS1  | 0.46240194   | 6.56E-30 | postive  |
| VEGFA     | KCNJ2-AS1  | 0.418745548  | 2.69E-24 | postive  |

|           |            |              |          |          |
|-----------|------------|--------------|----------|----------|
| ZEB1      | KCNJ2-AS1  | 0.514396082  | 9.65E-38 | postive  |
| EPAS1     | KCNJ2-AS1  | 0.405341978  | 9.89E-23 | postive  |
| ISCU      | POLR2J4    | 0.443758477  | 2.06E-27 | postive  |
| PHKG2     | POLR2J4    | 0.433813539  | 3.84E-26 | postive  |
| ATG4D     | POLR2J4    | 0.553103897  | 1.62E-44 | postive  |
| MAP1LC3A  | POLR2J4    | 0.572395207  | 3.08E-48 | postive  |
| TAZ       | POLR2J4    | 0.420707808  | 1.57E-24 | postive  |
| FANCD2    | LINC02446  | 0.403678584  | 1.53E-22 | postive  |
| STMN1     | LINC02446  | 0.599655647  | 6.19E-54 | postive  |
| RRM2      | LINC02446  | 0.547962959  | 1.45E-43 | postive  |
| AURKA     | LINC02446  | 0.505422101  | 2.72E-36 | postive  |
| CDKN2A    | LINC02446  | 0.507301079  | 1.36E-36 | postive  |
| IFNG      | LINC02446  | 0.492511197  | 2.79E-34 | postive  |
| BRD4      | CIRBP-AS1  | 0.441199938  | 4.41E-27 | postive  |
| SETD1B    | CIRBP-AS1  | 0.419588265  | 2.13E-24 | postive  |
| ALOX12    | CIRBP-AS1  | 0.429907219  | 1.18E-25 | postive  |
| PHKG2     | CIRBP-AS1  | 0.429906036  | 1.18E-25 | postive  |
| TAZ       | CIRBP-AS1  | 0.488192811  | 1.26E-33 | postive  |
| GPX4      | ILRUN-AS1  | 0.469272149  | 7.20E-31 | postive  |
| STAT3     | ILRUN-AS1  | -0.427652519 | 2.24E-25 | negative |
| OTUB1     | ILRUN-AS1  | 0.423285956  | 7.64E-25 | postive  |
| SP1       | ILRUN-AS1  | -0.462665612 | 6.04E-30 | negative |
| NOX1      | ILRUN-AS1  | 0.405986554  | 8.35E-23 | postive  |
| HRAS      | ILRUN-AS1  | 0.415493447  | 6.55E-24 | postive  |
| PHKG2     | ILRUN-AS1  | 0.423335293  | 7.54E-25 | postive  |
| MAPK1     | ILRUN-AS1  | -0.407116654 | 6.19E-23 | negative |
| ANO6      | ILRUN-AS1  | -0.492893689 | 2.44E-34 | negative |
| SIRT1     | ILRUN-AS1  | -0.401930719 | 2.41E-22 | negative |
| BACH1     | ILRUN-AS1  | -0.411683942 | 1.83E-23 | negative |
| GPX4      | OVOL1-AS1  | 0.417356776  | 3.94E-24 | postive  |
| ZNF419    | SLFNL1-AS1 | 0.433869339  | 3.78E-26 | postive  |
| TUBE1     | SLFNL1-AS1 | 0.465465684  | 2.47E-30 | postive  |
| ALOX12    | SLFNL1-AS1 | 0.588726879  | 1.38E-51 | postive  |
| GABPB1    | SLFNL1-AS1 | 0.4091425    | 3.62E-23 | postive  |
| ATM       | SLFNL1-AS1 | 0.476826061  | 5.99E-32 | postive  |
| FBXW7     | SLFNL1-AS1 | 0.405398828  | 9.74E-23 | postive  |
| HELLS     | AC104564.1 | 0.549651102  | 7.09E-44 | postive  |
| TUBE1     | AC104564.1 | 0.403010991  | 1.82E-22 | postive  |
| ALOX12    | AC104564.1 | 0.539795747  | 4.35E-42 | postive  |
| GABPB1    | AC104564.1 | 0.474854969  | 1.15E-31 | postive  |
| LINC00472 | AC104564.1 | 0.588499601  | 1.55E-51 | postive  |
| ATM       | AC104564.1 | 0.618842788  | 2.77E-58 | postive  |
| FBXW7     | AC104564.1 | 0.436163997  | 1.94E-26 | postive  |
| ZNF419    | IBA57-DT   | 0.50370042   | 5.10E-36 | postive  |
| VEGFA     | IBA57-DT   | 0.411560176  | 1.90E-23 | postive  |
| TUBE1     | IBA57-DT   | 0.416883714  | 4.48E-24 | postive  |
| ALOX12    | IBA57-DT   | 0.571195559  | 5.34E-48 | postive  |
| PHKG2     | IBA57-DT   | 0.410312679  | 2.65E-23 | postive  |
| TAZ       | IBA57-DT   | 0.537510745  | 1.11E-41 | postive  |
| HELLS     | ACAP2-IT1  | 0.505606504  | 2.54E-36 | postive  |
| KLHL24    | ACAP2-IT1  | 0.543198524  | 1.07E-42 | postive  |
| TUBE1     | ACAP2-IT1  | 0.461418631  | 8.97E-30 | postive  |
| IREB2     | ACAP2-IT1  | 0.492657047  | 2.65E-34 | postive  |
| GABPB1    | ACAP2-IT1  | 0.601486439  | 2.45E-54 | postive  |
| PIK3CA    | ACAP2-IT1  | 0.509585055  | 5.85E-37 | postive  |
| KRAS      | ACAP2-IT1  | 0.430116268  | 1.11E-25 | postive  |
| ATG7      | ACAP2-IT1  | 0.434637051  | 3.02E-26 | postive  |
| MAPK8     | ACAP2-IT1  | 0.476461491  | 6.76E-32 | postive  |

|           |            |              |           |          |
|-----------|------------|--------------|-----------|----------|
| LINC00472 | ACAP2-IT1  | 0.879232406  | 4.57E-175 | postive  |
| PRKAA1    | ACAP2-IT1  | 0.418906643  | 2.57E-24  | postive  |
| TGFBR1    | ACAP2-IT1  | 0.41782982   | 3.46E-24  | postive  |
| ATM       | ACAP2-IT1  | 0.707688388  | 4.65E-83  | postive  |
| FBXW7     | ACAP2-IT1  | 0.482750881  | 8.14E-33  | postive  |
| TUBE1     | AP000254.2 | 0.438331537  | 1.03E-26  | postive  |
| NOX1      | AP000254.2 | 0.534486776  | 3.78E-41  | postive  |
| NCOA4     | AP000254.2 | -0.419505044 | 2.18E-24  | negative |
| PHKG2     | AP000254.2 | 0.531929998  | 1.06E-40  | postive  |
| BECN1     | AP000254.2 | -0.496454734 | 6.92E-35  | negative |
| TAZ       | AP000254.2 | 0.593800958  | 1.15E-52  | postive  |
| ZNF419    | AC092119.2 | 0.522248409  | 4.79E-39  | postive  |
| TUBE1     | AC092119.2 | 0.541122376  | 2.52E-42  | postive  |
| ALOX12    | AC092119.2 | 0.5939018    | 1.10E-52  | postive  |
| PHKG2     | AC092119.2 | 0.612397655  | 8.64E-57  | postive  |
| TAZ       | AC092119.2 | 0.653477507  | 6.00E-67  | postive  |
| TRIB3     | COSMOC     | 0.465293089  | 2.61E-30  | postive  |
| BID       | COSMOC     | 0.442656669  | 2.86E-27  | postive  |
| HMGB1     | AC125257.1 | 0.436937027  | 1.55E-26  | postive  |
| GABPB1    | AC125257.1 | 0.457567936  | 3.02E-29  | postive  |
| NOX1      | AC125257.1 | 0.450040782  | 3.09E-28  | postive  |
| TFAP2C    | AC051619.6 | 0.517942217  | 2.51E-38  | postive  |
| HBA1      | AC051619.6 | 0.564324194  | 1.19E-46  | postive  |
| FANCD2    | AC004585.1 | 0.400163968  | 3.81E-22  | postive  |
| PML       | AC004585.1 | 0.443520444  | 2.21E-27  | postive  |
| GCH1      | AC004585.1 | 0.520567139  | 9.16E-39  | postive  |
| SLC2A6    | AC004585.1 | 0.404806895  | 1.14E-22  | postive  |
| IFNG      | AC004585.1 | 0.719659199  | 3.97E-87  | postive  |
| IREB2     | LINC01801  | 0.469927991  | 5.82E-31  | postive  |
| SP1       | LINC01801  | 0.533471952  | 5.69E-41  | postive  |
| PHKG2     | LINC01801  | -0.401770937 | 2.51E-22  | negative |
| MAPK1     | LINC01801  | 0.403841304  | 1.47E-22  | postive  |
| ZEB1      | LINC01801  | 0.439387243  | 7.54E-27  | postive  |
| PRKAA2    | LINC01801  | 0.431429369  | 7.62E-26  | postive  |
| EPAS1     | LINC01801  | 0.458142644  | 2.52E-29  | postive  |
| SIRT1     | LINC01801  | 0.534930137  | 3.16E-41  | postive  |
| FANCD2    | AC106028.3 | 0.523911654  | 2.51E-39  | postive  |
| HELLS     | AC106028.3 | 0.456803166  | 3.83E-29  | postive  |
| ZNF419    | AC106028.3 | 0.426379168  | 3.21E-25  | postive  |
| ALOX12    | AC106028.3 | 0.447014551  | 7.74E-28  | postive  |
| TFAP2C    | AC106028.3 | 0.412809634  | 1.35E-23  | postive  |
| TAZ       | AC106028.3 | 0.459487899  | 1.65E-29  | postive  |
| SLC3A2    | AC016866.1 | 0.40642231   | 7.44E-23  | postive  |
| ISCU      | AC016866.1 | 0.479156826  | 2.74E-32  | postive  |
| DDIT3     | AC016866.1 | 0.403980873  | 1.41E-22  | postive  |
| ATG4D     | AC016866.1 | 0.46820874   | 1.02E-30  | postive  |
| MAP1LC3A  | AC016866.1 | 0.40277342   | 1.94E-22  | postive  |
| GABARAPL1 | AC016866.1 | 0.496862367  | 5.99E-35  | postive  |
| LPIN1     | AC016866.1 | 0.42023557   | 1.78E-24  | postive  |
| HELLS     | AC109460.2 | 0.47829157   | 3.67E-32  | postive  |
| BRD4      | AC109460.2 | 0.436643116  | 1.69E-26  | postive  |
| ZNF419    | AC109460.2 | 0.601967427  | 1.92E-54  | postive  |
| VEGFA     | AC109460.2 | 0.510177048  | 4.69E-37  | postive  |
| TUBE1     | AC109460.2 | 0.668934514  | 3.41E-71  | postive  |
| SETD1B    | AC109460.2 | 0.56870499   | 1.66E-47  | postive  |
| ALOX12    | AC109460.2 | 0.792200173  | 2.88E-117 | postive  |
| GABPB1    | AC109460.2 | 0.477335996  | 5.05E-32  | postive  |
| ATM       | AC109460.2 | 0.607320642  | 1.23E-55  | postive  |



|           |            |              |           |          |
|-----------|------------|--------------|-----------|----------|
| YY1AP1    | AC109460.2 | 0.442451958  | 3.04E-27  | postive  |
| TAZ       | AC109460.2 | 0.460789361  | 1.09E-29  | postive  |
| FBXW7     | AC109460.2 | 0.491117782  | 4.55E-34  | postive  |
| VEGFA     | TBC1D8-AS1 | 0.426818141  | 2.83E-25  | postive  |
| ALOX12    | TBC1D8-AS1 | 0.500996102  | 1.36E-35  | postive  |
| ATM       | TBC1D8-AS1 | 0.448926716  | 4.34E-28  | postive  |
| YY1AP1    | TBC1D8-AS1 | 0.422536461  | 9.42E-25  | postive  |
| ZNF419    | AC092375.2 | 0.516435241  | 4.45E-38  | postive  |
| VEGFA     | AC092375.2 | 0.435744686  | 2.19E-26  | postive  |
| TUBE1     | AC092375.2 | 0.57528735   | 8.13E-49  | postive  |
| SETD1B    | AC092375.2 | 0.40929343   | 3.48E-23  | postive  |
| ALOX12    | AC092375.2 | 0.565757648  | 6.27E-47  | postive  |
| GABPB1    | AC092375.2 | 0.448202225  | 5.40E-28  | postive  |
| LINC00472 | AC092375.2 | 0.400571535  | 3.43E-22  | postive  |
| ATM       | AC092375.2 | 0.504099056  | 4.41E-36  | postive  |
| TAZ       | AC092375.2 | 0.446566999  | 8.86E-28  | postive  |
| FBXW7     | AC092375.2 | 0.424117958  | 6.06E-25  | postive  |
| ATM       | FP671120.6 | 0.405168523  | 1.04E-22  | postive  |
| HELLS     | AC007878.1 | 0.523236623  | 3.26E-39  | postive  |
| KLHL24    | AC007878.1 | 0.415466004  | 6.60E-24  | postive  |
| TUBE1     | AC007878.1 | 0.44038085   | 5.62E-27  | postive  |
| IREB2     | AC007878.1 | 0.432309978  | 5.92E-26  | postive  |
| GABPB1    | AC007878.1 | 0.573645866  | 1.74E-48  | postive  |
| PIK3CA    | AC007878.1 | 0.426985462  | 2.70E-25  | postive  |
| ATG7      | AC007878.1 | 0.444802132  | 1.51E-27  | postive  |
| MAPK8     | AC007878.1 | 0.448475602  | 4.97E-28  | postive  |
| LINC00472 | AC007878.1 | 0.789303167  | 7.71E-116 | postive  |
| ATM       | AC007878.1 | 0.740790615  | 7.45E-95  | postive  |
| FBXW7     | AC007878.1 | 0.479909862  | 2.13E-32  | postive  |
| STEAP3    | LNCsRLR    | 0.413267051  | 1.20E-23  | postive  |
| CYBB      | LNCsRLR    | 0.409287609  | 3.48E-23  | postive  |
| ANO6      | LNCsRLR    | 0.430245492  | 1.07E-25  | postive  |
| ATM       | LNCsRLR    | 0.402113478  | 2.30E-22  | postive  |
| MTDH      | LNCsRLR    | 0.468640855  | 8.84E-31  | postive  |
| BACH1     | LNCsRLR    | 0.590488826  | 5.87E-52  | postive  |
| MAPK9     | LINCMD1    | 0.405956263  | 8.41E-23  | postive  |
| GPX4      | RAP2C-AS1  | -0.415128371 | 7.23E-24  | negative |
| RB1       | RAP2C-AS1  | 0.452673033  | 1.38E-28  | postive  |
| HSPB1     | RAP2C-AS1  | -0.435063271 | 2.67E-26  | negative |
| GCLC      | RAP2C-AS1  | 0.488630368  | 1.08E-33  | postive  |
| MTOR      | RAP2C-AS1  | 0.541898256  | 1.83E-42  | postive  |
| ACSL3     | RAP2C-AS1  | 0.467185661  | 1.42E-30  | postive  |
| OTUB1     | RAP2C-AS1  | -0.423593267 | 7.02E-25  | negative |
| HIF1A     | RAP2C-AS1  | 0.408640715  | 4.13E-23  | postive  |
| OXSR1     | RAP2C-AS1  | 0.474249559  | 1.41E-31  | postive  |
| KLHL24    | RAP2C-AS1  | 0.548733131  | 1.05E-43  | postive  |
| ZFP69B    | RAP2C-AS1  | 0.435855913  | 2.12E-26  | postive  |
| EIF2S1    | RAP2C-AS1  | 0.508200023  | 9.77E-37  | postive  |
| MAP3K5    | RAP2C-AS1  | 0.505488559  | 2.65E-36  | postive  |
| MAPK14    | RAP2C-AS1  | 0.418197429  | 3.13E-24  | postive  |
| EIF2AK4   | RAP2C-AS1  | 0.484891572  | 3.92E-33  | postive  |
| IREB2     | RAP2C-AS1  | 0.743092709  | 9.65E-96  | postive  |
| SP1       | RAP2C-AS1  | 0.421464759  | 1.27E-24  | postive  |
| GABPB1    | RAP2C-AS1  | 0.556055444  | 4.53E-45  | postive  |
| PIK3CA    | RAP2C-AS1  | 0.6449905    | 1.01E-64  | postive  |
| KRAS      | RAP2C-AS1  | 0.620837562  | 9.38E-59  | postive  |
| HRAS      | RAP2C-AS1  | -0.423687929 | 6.83E-25  | negative |
| ULK2      | RAP2C-AS1  | 0.40765618   | 5.37E-23  | postive  |

|           |                        |             |           |         |
|-----------|------------------------|-------------|-----------|---------|
| MAPK1     | RAP2C-AS1              | 0.420545633 | 1.64E-24  | postive |
| ZEB1      | RAP2C-AS1              | 0.457231582 | 3.35E-29  | postive |
| MAPK8     | RAP2C-AS1              | 0.688094732 | 7.93E-77  | postive |
| MAPK9     | RAP2C-AS1              | 0.427702168 | 2.21E-25  | postive |
| LINC00472 | RAP2C-AS1              | 0.566460793 | 4.57E-47  | postive |
| PRKAA2    | RAP2C-AS1              | 0.584707283 | 9.61E-51  | postive |
| PRKAA1    | RAP2C-AS1              | 0.602327385 | 1.60E-54  | postive |
| TGFBR1    | RAP2C-AS1              | 0.401675126 | 2.58E-22  | postive |
| TLR4      | RAP2C-AS1              | 0.474942544 | 1.12E-31  | postive |
| ATM       | RAP2C-AS1              | 0.63861005  | 4.30E-63  | postive |
| SIRT1     | RAP2C-AS1              | 0.535306432 | 2.72E-41  | postive |
| TUBE1     | AC105206.2             | 0.45554584  | 5.67E-29  | postive |
| SETD1B    | AC105206.2             | 0.448873465 | 4.41E-28  | postive |
| ALOX12    | AC105206.2             | 0.520716805 | 8.65E-39  | postive |
| ULK2      | AC105206.2             | 0.401716699 | 2.55E-22  | postive |
| ATM       | AC105206.2             | 0.570857029 | 6.24E-48  | postive |
| HELLS     | AC145423.2             | 0.444100119 | 1.86E-27  | postive |
| ZNF419    | AC145423.2             | 0.482946099 | 7.62E-33  | postive |
| TUBE1     | AC145423.2             | 0.433119722 | 4.69E-26  | postive |
| ALOX12    | AC145423.2             | 0.608478181 | 6.74E-56  | postive |
| DUOX1     | AC145423.2             | 0.419048976 | 2.47E-24  | postive |
| FBXW7     | AC145423.2             | 0.400296138 | 3.68E-22  | postive |
| TAZ       | MIR503HG               | 0.56171371  | 3.80E-46  | postive |
| CD44      | AL133330.1             | 0.574960156 | 9.46E-49  | postive |
| SOCS1     | AL133330.1             | 0.548109728 | 1.36E-43  | postive |
| TUBE1     | AC016737.2             | 0.410494019 | 2.52E-23  | postive |
| ALOX12    | AC016737.2             | 0.401675745 | 2.58E-22  | postive |
| LINC00472 | AC016737.2             | 0.692743564 | 2.92E-78  | postive |
| ATM       | AC016737.2             | 0.407589323 | 5.47E-23  | postive |
| ZNF419    | AC135178.2             | 0.470347201 | 5.08E-31  | postive |
| VEGFA     | AC135178.2             | 0.55498051  | 7.22E-45  | postive |
| TUBE1     | AC135178.2             | 0.462457367 | 6.45E-30  | postive |
| SETD1B    | AC135178.2             | 0.431556126 | 7.35E-26  | postive |
| ALOX12    | AC135178.2             | 0.471883655 | 3.07E-31  | postive |
| ZEB1      | AC135178.2             | 0.422689397 | 9.03E-25  | postive |
| TAZ       | AC135178.2             | 0.429485817 | 1.33E-25  | postive |
| ZNF419    | AC078883.1             | 0.410540182 | 2.49E-23  | postive |
| KLHL24    | AC078883.1             | 0.41646289  | 5.03E-24  | postive |
| TUBE1     | AC078883.1             | 0.436854376 | 1.59E-26  | postive |
| GABPB1    | AC078883.1             | 0.518066484 | 2.39E-38  | postive |
| MAPK8     | AC078883.1             | 0.418194898 | 3.13E-24  | postive |
| LINC00472 | AC078883.1             | 0.679099317 | 3.96E-74  | postive |
| ATM       | AC078883.1             | 0.499069284 | 2.72E-35  | postive |
| FBXW7     | AC078883.1             | 0.508527866 | 8.65E-37  | postive |
| VEGFA     | AC007292.1             | 0.480296245 | 1.87E-32  | postive |
| TUBE1     | AC007292.1             | 0.437655703 | 1.25E-26  | postive |
| DRD4      | AC007292.1             | 0.4485533   | 4.86E-28  | postive |
| ALOX12    | AC007292.1             | 0.565680753 | 6.49E-47  | postive |
| PHKG2     | AC007292.1             | 0.476145158 | 7.51E-32  | postive |
| TAZ       | AC007292.1             | 0.642347784 | 4.84E-64  | postive |
| PHKG2     | AL137127.1             | 0.555916298 | 4.81E-45  | postive |
| TAZ       | AL137127.1             | 0.507017075 | 1.51E-36  | postive |
| FANCD2    | APCDD1L-D <sup>-</sup> | 0.470259246 | 5.22E-31  | postive |
| STMN1     | APCDD1L-D <sup>-</sup> | 0.736563962 | 3.00E-93  | postive |
| RRM2      | APCDD1L-D <sup>-</sup> | 0.559172571 | 1.16E-45  | postive |
| AURKA     | APCDD1L-D <sup>-</sup> | 0.569155158 | 1.35E-47  | postive |
| CDKN2A    | APCDD1L-D <sup>-</sup> | 0.789411651 | 6.82E-116 | postive |
| ISCU      | AL451069.1             | 0.402416954 | 2.13E-22  | postive |

|           |            |              |          |          |
|-----------|------------|--------------|----------|----------|
| DDIT3     | AL451069.1 | 0.424890359  | 4.88E-25 | postive  |
| GABARAPL1 | AL451069.1 | 0.446637355  | 8.68E-28 | postive  |
| ALOX12    | AC073316.2 | 0.442318956  | 3.16E-27 | postive  |
| HBA1      | AP007216.2 | 0.532057738  | 1.00E-40 | postive  |
| HIC1      | AP007216.2 | 0.427560696  | 2.30E-25 | postive  |
| HRAS      | AP007216.2 | 0.574237271  | 1.32E-48 | postive  |
| EGLN2     | AP007216.2 | 0.646640437  | 3.78E-65 | postive  |
| ALOX12    | AC129492.1 | 0.403850733  | 1.46E-22 | postive  |
| ALOX12B   | AC129492.1 | 0.679797018  | 2.46E-74 | postive  |
| HELLS     | AL161725.2 | 0.484140564  | 5.07E-33 | postive  |
| ZNF419    | AL161725.2 | 0.406810521  | 6.72E-23 | postive  |
| TUBE1     | AL161725.2 | 0.557095027  | 2.88E-45 | postive  |
| ALOX12    | AL161725.2 | 0.713936896  | 3.71E-85 | postive  |
| ATM       | AL161725.2 | 0.576974045  | 3.71E-49 | postive  |
| ZNF419    | AC132938.1 | 0.400072038  | 3.90E-22 | postive  |
| TUBE1     | AC132938.1 | 0.409342688  | 3.43E-23 | postive  |
| DRD4      | AC132938.1 | 0.418198974  | 3.13E-24 | postive  |
| ALOX12    | AC132938.1 | 0.471371424  | 3.63E-31 | postive  |
| HBA1      | AC132938.1 | 0.405537163  | 9.39E-23 | postive  |
| TAZ       | AC132938.1 | 0.484623816  | 4.30E-33 | postive  |
| TFAP2C    | SPON1-AS1  | 0.552205577  | 2.38E-44 | postive  |
| HBA1      | SPON1-AS1  | 0.506286029  | 1.98E-36 | postive  |
| DUOX1     | SPON1-AS1  | 0.40915213   | 3.61E-23 | postive  |
| ZNF419    | AC004846.2 | 0.418536029  | 2.85E-24 | postive  |
| TUBE1     | AC004846.2 | 0.477823823  | 4.29E-32 | postive  |
| ALOX12    | AC004846.2 | 0.581041319  | 5.50E-50 | postive  |
| PHKG2     | AC004846.2 | 0.470821947  | 4.35E-31 | postive  |
| TAZ       | AC004846.2 | 0.584103093  | 1.28E-50 | postive  |
| HELLS     | AC016586.1 | 0.513375984  | 1.42E-37 | postive  |
| ZNF419    | AC016586.1 | 0.46048909   | 1.20E-29 | postive  |
| TUBE1     | AC016586.1 | 0.50834365   | 9.26E-37 | postive  |
| ALOX12    | AC016586.1 | 0.533788996  | 5.01E-41 | postive  |
| GABPB1    | AC016586.1 | 0.582421864  | 2.86E-50 | postive  |
| ATG7      | AC016586.1 | 0.428214211  | 1.91E-25 | postive  |
| MAPK8     | AC016586.1 | 0.44812747   | 5.53E-28 | postive  |
| LINC00472 | AC016586.1 | 0.632303639  | 1.61E-61 | postive  |
| ATM       | AC016586.1 | 0.751441296  | 4.84E-99 | postive  |
| FBXW7     | AC016586.1 | 0.529596199  | 2.68E-40 | postive  |
| TFAP2C    | AD001527.1 | 0.566257545  | 5.01E-47 | postive  |
| HBA1      | AD001527.1 | 0.512966985  | 1.65E-37 | postive  |
| DUOX1     | AD001527.1 | 0.41847544   | 2.90E-24 | postive  |
| AKR1C1    | CTD-2297D1 | 0.424647801  | 5.22E-25 | postive  |
| AKR1C2    | CTD-2297D1 | 0.450293651  | 2.86E-28 | postive  |
| ENPP2     | AC007743.1 | 0.413434995  | 1.14E-23 | postive  |
| VEGFA     | AC007743.1 | 0.404925945  | 1.10E-22 | postive  |
| FTL       | AC007743.1 | -0.433321925 | 4.42E-26 | negative |
| IREB2     | AC007743.1 | 0.405707946  | 8.98E-23 | postive  |
| CAPG      | AC007743.1 | -0.431631055 | 7.20E-26 | negative |
| PRDX1     | AC007743.1 | -0.418266985 | 3.07E-24 | negative |
| ZEB1      | AC007743.1 | 0.616960578  | 7.62E-58 | postive  |
| MAPK8     | AC007743.1 | 0.520751043  | 8.54E-39 | postive  |
| PRKAA1    | AC007743.1 | 0.416520276  | 4.95E-24 | postive  |
| EPAS1     | AC007743.1 | 0.627546682  | 2.33E-60 | postive  |
| SIRT1     | AC007743.1 | 0.480120562  | 1.98E-32 | postive  |
| CHAC1     | AC018638.6 | 0.668977835  | 3.31E-71 | postive  |
| DDIT3     | AC018638.6 | 0.407568554  | 5.50E-23 | postive  |
| PHKG2     | AC018638.6 | 0.437347335  | 1.37E-26 | postive  |
| MAP1LC3A  | AC018638.6 | 0.49595473   | 8.27E-35 | postive  |

|           |            |              |           |          |
|-----------|------------|--------------|-----------|----------|
| TAZ       | AC018638.6 | 0.442160745  | 3.32E-27  | postive  |
| HELLS     | AC010186.3 | 0.61795167   | 4.47E-58  | postive  |
| TUBE1     | AC010186.3 | 0.423784819  | 6.65E-25  | postive  |
| ALOX12    | AC010186.3 | 0.426925489  | 2.75E-25  | postive  |
| IREB2     | AC010186.3 | 0.410231032  | 2.71E-23  | postive  |
| GABPB1    | AC010186.3 | 0.589738212  | 8.46E-52  | postive  |
| ATG7      | AC010186.3 | 0.512186812  | 2.21E-37  | postive  |
| MAPK8     | AC010186.3 | 0.400074732  | 3.90E-22  | postive  |
| LINC00472 | AC010186.3 | 0.64302248   | 3.25E-64  | postive  |
| ATM       | AC010186.3 | 0.75007101   | 1.72E-98  | postive  |
| FBXW7     | AC010186.3 | 0.532370263  | 8.86E-41  | postive  |
| BACH1     | AC010186.3 | 0.431584046  | 7.29E-26  | postive  |
| GPX4      | AC073896.4 | 0.449484503  | 3.66E-28  | postive  |
| RB1       | AC073896.4 | -0.436213226 | 1.91E-26  | negative |
| HSPB1     | AC073896.4 | 0.594508598  | 8.12E-53  | postive  |
| GCLC      | AC073896.4 | -0.429252245 | 1.42E-25  | negative |
| SLC40A1   | AC073896.4 | -0.437776569 | 1.21E-26  | negative |
| MTOR      | AC073896.4 | -0.400478362 | 3.51E-22  | negative |
| LAMP2     | AC073896.4 | -0.414924448 | 7.64E-24  | negative |
| CHMP5     | AC073896.4 | -0.405936916 | 8.46E-23  | negative |
| EIF2S1    | AC073896.4 | -0.451683502 | 1.87E-28  | negative |
| MAPK14    | AC073896.4 | -0.518755153 | 1.84E-38  | negative |
| EIF2AK4   | AC073896.4 | -0.436299382 | 1.86E-26  | negative |
| IREB2     | AC073896.4 | -0.534039012 | 4.53E-41  | negative |
| HBA1      | AC073896.4 | 0.416165935  | 5.45E-24  | postive  |
| NOX1      | AC073896.4 | 0.442450013  | 3.04E-27  | postive  |
| PIK3CA    | AC073896.4 | -0.48415869  | 5.04E-33  | negative |
| SCP2      | AC073896.4 | -0.415364666 | 6.78E-24  | negative |
| NRAS      | AC073896.4 | -0.50757017  | 1.23E-36  | negative |
| KRAS      | AC073896.4 | -0.405696678 | 9.01E-23  | negative |
| HRAS      | AC073896.4 | 0.746727162  | 3.66E-97  | postive  |
| ATG5      | AC073896.4 | -0.421756398 | 1.17E-24  | negative |
| NCOA4     | AC073896.4 | -0.624812109 | 1.06E-59  | negative |
| PHKG2     | AC073896.4 | 0.650836272  | 3.01E-66  | postive  |
| BECN1     | AC073896.4 | -0.561821149 | 3.62E-46  | negative |
| MAP1LC3A  | AC073896.4 | 0.45484344   | 7.05E-29  | postive  |
| MAPK1     | AC073896.4 | -0.527977227 | 5.09E-40  | negative |
| MAPK9     | AC073896.4 | -0.462350903 | 6.67E-30  | negative |
| PRKAA2    | AC073896.4 | -0.401858073 | 2.46E-22  | negative |
| PRKAA1    | AC073896.4 | -0.444114649 | 1.85E-27  | negative |
| ANO6      | AC073896.4 | -0.445109687 | 1.37E-27  | negative |
| TLR4      | AC073896.4 | -0.450807728 | 2.44E-28  | negative |
| EGLN2     | AC073896.4 | 0.653592835  | 5.59E-67  | postive  |
| TAZ       | AC073896.4 | 0.608123405  | 8.10E-56  | postive  |
| MTDH      | AC073896.4 | -0.530695901 | 1.73E-40  | negative |
| SIRT1     | AC073896.4 | -0.422381135 | 9.84E-25  | negative |
| BACH1     | AC073896.4 | -0.417102518 | 4.22E-24  | negative |
| ATF4      | KMT2E-AS1  | 0.427362433  | 2.43E-25  | postive  |
| DRD4      | KMT2E-AS1  | 0.404218309  | 1.33E-22  | postive  |
| HRAS      | KMT2E-AS1  | 0.438855864  | 8.82E-27  | postive  |
| NCOA4     | KMT2E-AS1  | -0.438529646 | 9.70E-27  | negative |
| PHKG2     | KMT2E-AS1  | 0.645667149  | 6.77E-65  | postive  |
| TAZ       | KMT2E-AS1  | 0.761062953  | 5.18E-103 | postive  |
| MTDH      | KMT2E-AS1  | -0.410968503 | 2.22E-23  | negative |
| PHKG2     | AL355802.3 | 0.488669148  | 1.07E-33  | postive  |
| TAZ       | AL355802.3 | 0.456101928  | 4.77E-29  | postive  |
| FANCD2    | AL356299.2 | 0.418157906  | 3.16E-24  | postive  |
| HELLS     | AL356299.2 | 0.455819053  | 5.20E-29  | postive  |

|           |            |             |          |         |
|-----------|------------|-------------|----------|---------|
| ZNF419    | AL356299.2 | 0.424903127 | 4.86E-25 | postive |
| ALOX12    | AL356299.2 | 0.540281215 | 3.56E-42 | postive |
| TFAP2C    | AL356299.2 | 0.413294942 | 1.19E-23 | postive |
| HELLS     | RBMS3-AS3  | 0.48173262  | 1.15E-32 | postive |
| GABPB1    | RBMS3-AS3  | 0.534630781 | 3.57E-41 | postive |
| ATG7      | RBMS3-AS3  | 0.442062226 | 3.42E-27 | postive |
| MAPK8     | RBMS3-AS3  | 0.418670408 | 2.75E-24 | postive |
| LINC00472 | RBMS3-AS3  | 0.525410042 | 1.40E-39 | postive |
| ATM       | RBMS3-AS3  | 0.668088294 | 5.91E-71 | postive |
| FBXW7     | RBMS3-AS3  | 0.412490339 | 1.48E-23 | postive |
| STAT3     | AC022509.3 | 0.431867208 | 6.72E-26 | postive |
| SP1       | AC022509.3 | 0.469906336 | 5.86E-31 | postive |
| ANO6      | AC022509.3 | 0.479243353 | 2.66E-32 | postive |
| HELLS     | AC145207.8 | 0.462260474 | 6.87E-30 | postive |
| ZNF419    | AC145207.8 | 0.426715453 | 2.92E-25 | postive |
| TUBE1     | AC145207.8 | 0.43467044  | 2.99E-26 | postive |
| MAFG      | AC145207.8 | 0.50087441  | 1.42E-35 | postive |
| ALOX12    | AC145207.8 | 0.620487745 | 1.13E-58 | postive |
| ATM       | AC145207.8 | 0.447562727 | 6.56E-28 | postive |
| FBXW7     | AC145207.8 | 0.423409765 | 7.38E-25 | postive |
| HELLS     | AL592148.3 | 0.415588734 | 6.38E-24 | postive |
| TUBE1     | AL592148.3 | 0.425512854 | 4.10E-25 | postive |
| GABPB1    | AL592148.3 | 0.4770071   | 5.63E-32 | postive |
| ATM       | AL592148.3 | 0.475034892 | 1.09E-31 | postive |
| FBXW7     | AL592148.3 | 0.442470059 | 3.03E-27 | postive |
| FANCD2    | AC079322.1 | 0.400025259 | 3.95E-22 | postive |
| ALOX12    | AC079322.1 | 0.427750821 | 2.18E-25 | postive |
| TFAP2C    | AC079322.1 | 0.540255238 | 3.60E-42 | postive |
| HBA1      | AC079322.1 | 0.477506583 | 4.77E-32 | postive |
| DUOX1     | AC079322.1 | 0.430624914 | 9.60E-26 | postive |
| RRM2      | UST-AS2    | 0.454361953 | 8.18E-29 | postive |
| AURKA     | UST-AS2    | 0.473926113 | 1.57E-31 | postive |
| KLHL24    | AL021154.1 | 0.443365216 | 2.32E-27 | postive |
| GABARAPL1 | AL021154.1 | 0.464662037 | 3.19E-30 | postive |
| LINC00472 | AL021154.1 | 0.559914736 | 8.40E-46 | postive |
| LPIN1     | AL021154.1 | 0.507425158 | 1.30E-36 | postive |
| ALOX12    | FAM153CP   | 0.42511021  | 4.59E-25 | postive |
| HELLS     | MIRLET7A1H | 0.495129766 | 1.11E-34 | postive |
| KLHL24    | MIRLET7A1H | 0.409178727 | 3.58E-23 | postive |
| TUBE1     | MIRLET7A1H | 0.461512567 | 8.70E-30 | postive |
| IREB2     | MIRLET7A1H | 0.436027335 | 2.02E-26 | postive |
| GABPB1    | MIRLET7A1H | 0.579745109 | 1.01E-49 | postive |
| PIK3CA    | MIRLET7A1H | 0.427142176 | 2.59E-25 | postive |
| ATG7      | MIRLET7A1H | 0.411534196 | 1.91E-23 | postive |
| MAPK8     | MIRLET7A1H | 0.472106867 | 2.85E-31 | postive |
| LINC00472 | MIRLET7A1H | 0.752382478 | 2.02E-99 | postive |
| ATM       | MIRLET7A1H | 0.724652521 | 6.89E-89 | postive |
| FBXW7     | MIRLET7A1H | 0.476444247 | 6.80E-32 | postive |
| HELLS     | ZNF346-IT1 | 0.518639331 | 1.92E-38 | postive |
| ZNF419    | ZNF346-IT1 | 0.441446562 | 4.10E-27 | postive |
| TUBE1     | ZNF346-IT1 | 0.466778401 | 1.62E-30 | postive |
| ALOX12    | ZNF346-IT1 | 0.529971577 | 2.31E-40 | postive |
| GABPB1    | ZNF346-IT1 | 0.53561064  | 2.40E-41 | postive |
| MAPK8     | ZNF346-IT1 | 0.41666453  | 4.76E-24 | postive |
| LINC00472 | ZNF346-IT1 | 0.732344524 | 1.12E-91 | postive |
| ATM       | ZNF346-IT1 | 0.585793052 | 5.71E-51 | postive |
| FBXW7     | ZNF346-IT1 | 0.468121232 | 1.05E-30 | postive |
| ALOX12    | AC005041.3 | 0.433182244 | 4.60E-26 | postive |

|           |            |             |           |         |
|-----------|------------|-------------|-----------|---------|
| EGLN2     | AC005041.3 | 0.481859333 | 1.10E-32  | postive |
| TAZ       | AC005041.3 | 0.400168663 | 3.81E-22  | postive |
| TFAP2C    | AC025048.4 | 0.58066587  | 6.56E-50  | postive |
| HBA1      | AC025048.4 | 0.512936015 | 1.67E-37  | postive |
| DUOX1     | AC025048.4 | 0.400373768 | 3.61E-22  | postive |
| VEGFA     | AC024337.2 | 0.586521878 | 4.02E-51  | postive |
| TUBE1     | AC024337.2 | 0.569619313 | 1.10E-47  | postive |
| ALOX12    | AC024337.2 | 0.468035471 | 1.08E-30  | postive |
| TAZ       | AC024337.2 | 0.591169977 | 4.20E-52  | postive |
| TUBE1     | AC024896.1 | 0.408782979 | 3.98E-23  | postive |
| ALOX12    | AC024896.1 | 0.40982188  | 3.02E-23  | postive |
| HELLS     | AC015813.1 | 0.457680281 | 2.91E-29  | postive |
| ZNF419    | AC015813.1 | 0.544606048 | 5.93E-43  | postive |
| TUBE1     | AC015813.1 | 0.536199776 | 1.89E-41  | postive |
| ALOX12    | AC015813.1 | 0.618336831 | 3.63E-58  | postive |
| GABPB1    | AC015813.1 | 0.435424389 | 2.40E-26  | postive |
| ATM       | AC015813.1 | 0.427663821 | 2.23E-25  | postive |
| TAZ       | AC015813.1 | 0.538009555 | 9.05E-42  | postive |
| FBXW7     | AC015813.1 | 0.443826086 | 2.02E-27  | postive |
| HELLS     | BCL2L1-AS1 | 0.493983682 | 1.66E-34  | postive |
| KLHL24    | BCL2L1-AS1 | 0.445872476 | 1.09E-27  | postive |
| TUBE1     | BCL2L1-AS1 | 0.408083689 | 4.79E-23  | postive |
| IREB2     | BCL2L1-AS1 | 0.41201412  | 1.68E-23  | postive |
| GABPB1    | BCL2L1-AS1 | 0.55071668  | 4.50E-44  | postive |
| PIK3CA    | BCL2L1-AS1 | 0.431738933 | 6.98E-26  | postive |
| ATG7      | BCL2L1-AS1 | 0.456335549 | 4.43E-29  | postive |
| LINC00472 | BCL2L1-AS1 | 0.815123781 | 1.99E-129 | postive |
| ATM       | BCL2L1-AS1 | 0.687327965 | 1.36E-76  | postive |
| FBXW7     | BCL2L1-AS1 | 0.431006502 | 8.61E-26  | postive |
| HELLS     | MALAT1     | 0.45017185  | 2.97E-28  | postive |
| KLHL24    | MALAT1     | 0.49358189  | 1.91E-34  | postive |
| IREB2     | MALAT1     | 0.417060256 | 4.27E-24  | postive |
| GABPB1    | MALAT1     | 0.543267123 | 1.04E-42  | postive |
| PIK3CA    | MALAT1     | 0.440674333 | 5.16E-27  | postive |
| ATG7      | MALAT1     | 0.409914999 | 2.94E-23  | postive |
| MAPK8     | MALAT1     | 0.402681744 | 1.98E-22  | postive |
| LINC00472 | MALAT1     | 0.882000234 | 1.34E-177 | postive |
| ATM       | MALAT1     | 0.654041011 | 4.24E-67  | postive |
| FBXW7     | MALAT1     | 0.438009524 | 1.13E-26  | postive |
| ISCU      | LINC01594  | 0.480807104 | 1.57E-32  | postive |
| LINC00472 | LINC01594  | 0.435859724 | 2.12E-26  | postive |
| LPIN1     | LINC01594  | 0.447281349 | 7.14E-28  | postive |
| HELLS     | AC012593.2 | 0.484547404 | 4.41E-33  | postive |
| ZNF419    | AC012593.2 | 0.410742393 | 2.36E-23  | postive |
| TUBE1     | AC012593.2 | 0.528293013 | 4.49E-40  | postive |
| ALOX12    | AC012593.2 | 0.611688102 | 1.26E-56  | postive |
| GABPB1    | AC012593.2 | 0.485419156 | 3.27E-33  | postive |
| ATM       | AC012593.2 | 0.686330875 | 2.73E-76  | postive |
| FBXW7     | AC012593.2 | 0.455870927 | 5.12E-29  | postive |
| ALOX12    | AL162431.1 | 0.465560313 | 2.39E-30  | postive |
| TAZ       | AL162431.1 | 0.506908315 | 1.57E-36  | postive |
| TFAP2C    | AC005332.1 | 0.573226097 | 2.11E-48  | postive |
| HBA1      | AC005332.1 | 0.524333491 | 2.13E-39  | postive |
| DUOX1     | AC005332.1 | 0.412860095 | 1.34E-23  | postive |
| TUBE1     | AC105105.1 | 0.535426237 | 2.59E-41  | postive |
| ALOX12    | AC105105.1 | 0.61655049  | 9.49E-58  | postive |
| ATM       | AC105105.1 | 0.54461879  | 5.90E-43  | postive |
| TAZ       | AC105105.1 | 0.453920802 | 9.38E-29  | postive |

|           |            |              |           |          |
|-----------|------------|--------------|-----------|----------|
| HELLS     | AC068792.1 | 0.434211285  | 3.42E-26  | postive  |
| GABPB1    | AC068792.1 | 0.403678469  | 1.53E-22  | postive  |
| LINC00472 | AC068792.1 | 0.625575939  | 6.96E-60  | postive  |
| FBXW7     | AC068792.1 | 0.400490534  | 3.50E-22  | postive  |
| HRAS      | AC026803.2 | 0.510640915  | 3.95E-37  | postive  |
| EGLN2     | AC026803.2 | 0.564464405  | 1.12E-46  | postive  |
| LINC00472 | AC110609.1 | 0.410414372  | 2.58E-23  | postive  |
| ATM       | AC110609.1 | 0.453713552  | 1.00E-28  | postive  |
| ZNF419    | LINC00653  | 0.503584807  | 5.32E-36  | postive  |
| TUBE1     | LINC00653  | 0.490297868  | 6.05E-34  | postive  |
| ALOX12    | LINC00653  | 0.545900057  | 3.45E-43  | postive  |
| PHKG2     | LINC00653  | 0.583081414  | 2.09E-50  | postive  |
| TAZ       | LINC00653  | 0.682541062  | 3.77E-75  | postive  |
| HELLS     | AC019080.4 | 0.454779931  | 7.19E-29  | postive  |
| LINC00472 | AC019080.4 | 0.429757212  | 1.23E-25  | postive  |
| ATM       | AC019080.4 | 0.422582923  | 9.30E-25  | postive  |
| PHKG2     | SNHG12     | 0.405209666  | 1.02E-22  | postive  |
| SAT1      | SNHG12     | 0.426362152  | 3.22E-25  | postive  |
| TAZ       | SNHG12     | 0.487360041  | 1.68E-33  | postive  |
| ACO1      | ST20-AS1   | 0.446386295  | 9.36E-28  | postive  |
| WIP1      | ST20-AS1   | 0.477654199  | 4.54E-32  | postive  |
| HELLS     | AC008735.1 | 0.421194118  | 1.37E-24  | postive  |
| ZNF419    | AC008735.1 | 0.533511734  | 5.60E-41  | postive  |
| VEGFA     | AC008735.1 | 0.409499782  | 3.29E-23  | postive  |
| TUBE1     | AC008735.1 | 0.549411789  | 7.85E-44  | postive  |
| SETD1B    | AC008735.1 | 0.500746206  | 1.49E-35  | postive  |
| ALOX12    | AC008735.1 | 0.70987641   | 8.70E-84  | postive  |
| ATM       | AC008735.1 | 0.444499138  | 1.65E-27  | postive  |
| TAZ       | AC008735.1 | 0.408593228  | 4.19E-23  | postive  |
| FBXW7     | AC008735.1 | 0.400709148  | 3.31E-22  | postive  |
| BRD4      | AL592211.1 | 0.410950931  | 2.23E-23  | postive  |
| ZNF419    | AL592211.1 | 0.49874898   | 3.05E-35  | postive  |
| TUBE1     | AL592211.1 | 0.475544471  | 9.17E-32  | postive  |
| ALOX12    | AL592211.1 | 0.487012442  | 1.89E-33  | postive  |
| PHKG2     | AL592211.1 | 0.546817204  | 2.35E-43  | postive  |
| TAZ       | AL592211.1 | 0.610647602  | 2.17E-56  | postive  |
| STMN1     | AC079949.1 | 0.614717359  | 2.53E-57  | postive  |
| RRM2      | AC079949.1 | 0.400527593  | 3.47E-22  | postive  |
| CDKN2A    | AC079949.1 | 0.677750807  | 9.85E-74  | postive  |
| MUC1      | AL121820.2 | 0.472757052  | 2.30E-31  | postive  |
| ZNF419    | AC010973.2 | 0.429913925  | 1.18E-25  | postive  |
| DRD4      | AC010973.2 | 0.416093445  | 5.56E-24  | postive  |
| NCOA4     | AC010973.2 | -0.467679835 | 1.21E-30  | negative |
| PHKG2     | AC010973.2 | 0.709521957  | 1.14E-83  | postive  |
| TAZ       | AC010973.2 | 0.791337977  | 7.70E-117 | postive  |
| TFAP2C    | LINC00471  | 0.540432546  | 3.35E-42  | postive  |
| HBA1      | LINC00471  | 0.495108254  | 1.12E-34  | postive  |
| DUOX1     | LINC00471  | 0.405356367  | 9.85E-23  | postive  |
| ZNF419    | AL450384.2 | 0.454102502  | 8.86E-29  | postive  |
| TUBE1     | AL450384.2 | 0.431367977  | 7.76E-26  | postive  |
| ALOX12    | AL450384.2 | 0.533161761  | 6.45E-41  | postive  |
| TFAP2C    | AL450384.2 | 0.425155238  | 4.53E-25  | postive  |
| TAZ       | AL450384.2 | 0.414558224  | 8.44E-24  | postive  |
| RB1       | AC107027.3 | 0.463142975  | 5.18E-30  | postive  |
| ACSL3     | AC107027.3 | 0.424517189  | 5.42E-25  | postive  |
| OXSR1     | AC107027.3 | 0.429563799  | 1.30E-25  | postive  |
| KLHL24    | AC107027.3 | 0.44688696   | 8.05E-28  | postive  |
| MAPK14    | AC107027.3 | 0.475593055  | 9.02E-32  | postive  |

|           |            |              |          |          |
|-----------|------------|--------------|----------|----------|
| IREB2     | AC107027.3 | 0.510634666  | 3.96E-37 | postive  |
| PIK3CA    | AC107027.3 | 0.51999751   | 1.14E-38 | postive  |
| NRAS      | AC107027.3 | 0.421244823  | 1.35E-24 | postive  |
| KRAS      | AC107027.3 | 0.511263454  | 3.13E-37 | postive  |
| SLC38A1   | AC107027.3 | 0.528534744  | 4.08E-40 | postive  |
| NCOA4     | AC107027.3 | 0.442627203  | 2.89E-27 | postive  |
| SNX4      | AC107027.3 | 0.506898314  | 1.58E-36 | postive  |
| MAPK1     | AC107027.3 | 0.456403858  | 4.34E-29 | postive  |
| MAPK9     | AC107027.3 | 0.451120189  | 2.22E-28 | postive  |
| PRKAA2    | AC107027.3 | 0.492908093  | 2.43E-34 | postive  |
| PRKAA1    | AC107027.3 | 0.457134608  | 3.45E-29 | postive  |
| TGFBR1    | AC107027.3 | 0.435087014  | 2.65E-26 | postive  |
| ANO6      | AC107027.3 | 0.484414944  | 4.62E-33 | postive  |
| MTDH      | AC107027.3 | 0.442632917  | 2.88E-27 | postive  |
| BACH1     | AC107027.3 | 0.445216288  | 1.33E-27 | postive  |
| FANCD2    | AL157838.1 | 0.487097211  | 1.84E-33 | postive  |
| HELLS     | AL157838.1 | 0.552292679  | 2.30E-44 | postive  |
| ZNF419    | AL157838.1 | 0.437442285  | 1.33E-26 | postive  |
| TUBE1     | AL157838.1 | 0.433925556  | 3.71E-26 | postive  |
| ALOX12    | AL157838.1 | 0.539084097  | 5.83E-42 | postive  |
| GABPB1    | AL157838.1 | 0.46496609   | 2.89E-30 | postive  |
| LINC00472 | AL157838.1 | 0.55242873   | 2.17E-44 | postive  |
| ATM       | AL157838.1 | 0.518293771  | 2.19E-38 | postive  |
| FBXW7     | AL157838.1 | 0.448807517  | 4.50E-28 | postive  |
| ATP6V1G2  | LINC01315  | 0.444541294  | 1.63E-27 | postive  |
| GCLC      | PLBD1-AS1  | 0.46108195   | 9.98E-30 | postive  |
| MTOR      | PLBD1-AS1  | 0.42632775   | 3.26E-25 | postive  |
| FH        | PLBD1-AS1  | 0.436099463  | 1.98E-26 | postive  |
| ISCU      | PLBD1-AS1  | 0.541341436  | 2.30E-42 | postive  |
| ACSL3     | PLBD1-AS1  | 0.482567242  | 8.66E-33 | postive  |
| KLHL24    | PLBD1-AS1  | 0.553495547  | 1.37E-44 | postive  |
| EIF2AK4   | PLBD1-AS1  | 0.477444245  | 4.87E-32 | postive  |
| IREB2     | PLBD1-AS1  | 0.450810692  | 2.44E-28 | postive  |
| CS        | PLBD1-AS1  | 0.539088701  | 5.82E-42 | postive  |
| PIK3CA    | PLBD1-AS1  | 0.449249307  | 3.93E-28 | postive  |
| GOT1      | PLBD1-AS1  | 0.438809625  | 8.94E-27 | postive  |
| GABARAPL1 | PLBD1-AS1  | 0.617282932  | 6.41E-58 | postive  |
| WIP1      | PLBD1-AS1  | 0.430727791  | 9.32E-26 | postive  |
| LPIN1     | PLBD1-AS1  | 0.511544772  | 2.82E-37 | postive  |
| HSF1      | MELTF-AS1  | 0.554290118  | 9.73E-45 | postive  |
| G6PD      | MELTF-AS1  | 0.421608348  | 1.22E-24 | postive  |
| NCOA4     | MELTF-AS1  | -0.462326701 | 6.72E-30 | negative |
| PHKG2     | MELTF-AS1  | 0.585899033  | 5.43E-51 | postive  |
| ULK1      | MELTF-AS1  | 0.480291255  | 1.87E-32 | postive  |
| BID       | MELTF-AS1  | 0.461784899  | 7.98E-30 | postive  |
| TAZ       | MELTF-AS1  | 0.549521673  | 7.49E-44 | postive  |
| ZNF419    | MIR4453HG  | 0.569980067  | 9.30E-48 | postive  |
| TUBE1     | MIR4453HG  | 0.560581518  | 6.26E-46 | postive  |
| SETD1B    | MIR4453HG  | 0.428390922  | 1.82E-25 | postive  |
| ALOX12    | MIR4453HG  | 0.493031484  | 2.32E-34 | postive  |
| GABPB1    | MIR4453HG  | 0.595671277  | 4.56E-53 | postive  |
| MAPK8     | MIR4453HG  | 0.45730335   | 3.28E-29 | postive  |
| LINC00472 | MIR4453HG  | 0.419558343  | 2.15E-24 | postive  |
| LPIN1     | MIR4453HG  | 0.442756036  | 2.78E-27 | postive  |
| ATM       | MIR4453HG  | 0.467217647  | 1.40E-30 | postive  |
| FBXW7     | MIR4453HG  | 0.418421086  | 2.94E-24 | postive  |
| LINC00472 | AC012313.9 | 0.504915212  | 3.27E-36 | postive  |
| HELLS     | GARS1-DT   | 0.51617299   | 4.92E-38 | postive  |



|           |            |             |          |         |
|-----------|------------|-------------|----------|---------|
| ZNF419    | GARS1-DT   | 0.523723279 | 2.70E-39 | postive |
| TUBE1     | GARS1-DT   | 0.662680536 | 1.91E-69 | postive |
| ALOX12    | GARS1-DT   | 0.647484645 | 2.28E-65 | postive |
| GABPB1    | GARS1-DT   | 0.531166066 | 1.43E-40 | postive |
| LINC00472 | GARS1-DT   | 0.480058336 | 2.03E-32 | postive |
| ATM       | GARS1-DT   | 0.657268405 | 5.76E-68 | postive |
| TAZ       | GARS1-DT   | 0.47485798  | 1.15E-31 | postive |
| FBXW7     | GARS1-DT   | 0.53209601  | 9.89E-41 | postive |
| ZEB1      | AF064858.2 | 0.442867922 | 2.69E-27 | postive |
| EPAS1     | AF064858.2 | 0.449068161 | 4.15E-28 | postive |
| ZNF419    | AL512791.1 | 0.546051014 | 3.24E-43 | postive |
| VEGFA     | AL512791.1 | 0.507614971 | 1.21E-36 | postive |
| TUBE1     | AL512791.1 | 0.602186219 | 1.72E-54 | postive |
| SETD1B    | AL512791.1 | 0.503488085 | 5.51E-36 | postive |
| ALOX12    | AL512791.1 | 0.644180649 | 1.64E-64 | postive |
| GABPB1    | AL512791.1 | 0.445106703 | 1.38E-27 | postive |
| ZEB1      | AL512791.1 | 0.401177803 | 2.93E-22 | postive |
| MAPK8     | AL512791.1 | 0.464289823 | 3.59E-30 | postive |
| ATM       | AL512791.1 | 0.550163252 | 5.70E-44 | postive |
| YY1AP1    | AL512791.1 | 0.407027587 | 6.34E-23 | postive |
| FBXW7     | AL512791.1 | 0.456888211 | 3.73E-29 | postive |
| HELLS     | AL137779.2 | 0.423026266 | 8.22E-25 | postive |
| IREB2     | AL137779.2 | 0.401471094 | 2.72E-22 | postive |
| GABPB1    | AL137779.2 | 0.435877353 | 2.11E-26 | postive |
| LINC00472 | AL137779.2 | 0.526439988 | 9.32E-40 | postive |
| ATM       | AL137779.2 | 0.43222237  | 6.07E-26 | postive |
| TUBE1     | ZDHHC20-IT | 0.42223887  | 1.02E-24 | postive |
| ALOX12    | ZDHHC20-IT | 0.401940046 | 2.41E-22 | postive |
| GABPB1    | ZDHHC20-IT | 0.42896393  | 1.54E-25 | postive |
| LINC00472 | ZDHHC20-IT | 0.734712186 | 1.48E-92 | postive |
| ATM       | ZDHHC20-IT | 0.478671858 | 3.23E-32 | postive |
| TAZ       | PRKAG2-AS1 | 0.427649231 | 2.24E-25 | postive |
| AGPAT3    | AC010307.4 | 0.511706328 | 2.65E-37 | postive |
| VEGFA     | AC021016.2 | 0.441698314 | 3.81E-27 | postive |
| ALOX12    | AC021016.2 | 0.531827762 | 1.10E-40 | postive |
| TAZ       | AC021016.2 | 0.501717706 | 1.05E-35 | postive |
| ATM       | AC090912.1 | 0.475854762 | 8.27E-32 | postive |
| FBXW7     | AC090912.1 | 0.406780636 | 6.77E-23 | postive |
| HELLS     | AC010761.1 | 0.513317479 | 1.45E-37 | postive |
| BRD4      | AC010761.1 | 0.410181779 | 2.74E-23 | postive |
| ZNF419    | AC010761.1 | 0.428884724 | 1.58E-25 | postive |
| VEGFA     | AC010761.1 | 0.40475105  | 1.15E-22 | postive |
| TUBE1     | AC010761.1 | 0.496350328 | 7.19E-35 | postive |
| ALOX12    | AC010761.1 | 0.545318903 | 4.40E-43 | postive |
| PHKG2     | AC010761.1 | 0.431083741 | 8.42E-26 | postive |
| TAZ       | AC010761.1 | 0.567864732 | 2.43E-47 | postive |
| FBXW7     | AC010761.1 | 0.426420413 | 3.17E-25 | postive |
| HELLS     | AL157392.4 | 0.511981398 | 2.39E-37 | postive |
| ZNF419    | AL157392.4 | 0.441232578 | 4.37E-27 | postive |
| TUBE1     | AL157392.4 | 0.561349802 | 4.46E-46 | postive |
| ALOX12    | AL157392.4 | 0.552279585 | 2.31E-44 | postive |
| GABPB1    | AL157392.4 | 0.526995979 | 7.49E-40 | postive |
| LINC00472 | AL157392.4 | 0.536819197 | 1.47E-41 | postive |
| ATM       | AL157392.4 | 0.669334023 | 2.62E-71 | postive |
| FBXW7     | AL157392.4 | 0.505249868 | 2.89E-36 | postive |
| ALOX12    | AC079015.1 | 0.479864567 | 2.16E-32 | postive |
| IFNG      | AC079015.1 | 0.453666857 | 1.01E-28 | postive |
| ATM       | AC079015.1 | 0.42231512  | 1.00E-24 | postive |

|           |            |             |           |         |
|-----------|------------|-------------|-----------|---------|
| VEGFA     | C1RL-AS1   | 0.508859824 | 7.65E-37  | postive |
| TUBE1     | C1RL-AS1   | 0.557771387 | 2.15E-45  | postive |
| SETD1B    | C1RL-AS1   | 0.506809917 | 1.63E-36  | postive |
| ALOX12    | C1RL-AS1   | 0.711190232 | 3.15E-84  | postive |
| SP1       | C1RL-AS1   | 0.418197178 | 3.13E-24  | postive |
| ATM       | C1RL-AS1   | 0.406350289 | 7.58E-23  | postive |
| YY1AP1    | C1RL-AS1   | 0.402174132 | 2.26E-22  | postive |
| TAZ       | C1RL-AS1   | 0.453455869 | 1.08E-28  | postive |
| TFAP2C    | AC106738.1 | 0.486444752 | 2.30E-33  | postive |
| HBA1      | AC106738.1 | 0.57884544  | 1.55E-49  | postive |
| TAZ       | AC137834.2 | 0.479666334 | 2.31E-32  | postive |
| HELLS     | AC018690.1 | 0.50987733  | 5.24E-37  | postive |
| ZNF419    | AC018690.1 | 0.507588976 | 1.22E-36  | postive |
| TUBE1     | AC018690.1 | 0.56917739  | 1.34E-47  | postive |
| ALOX12    | AC018690.1 | 0.557503316 | 2.41E-45  | postive |
| GABPB1    | AC018690.1 | 0.514948281 | 7.83E-38  | postive |
| ATM       | AC018690.1 | 0.552942055 | 1.74E-44  | postive |
| TAZ       | AC018690.1 | 0.413816827 | 1.03E-23  | postive |
| FBXW7     | AC018690.1 | 0.52460062  | 1.92E-39  | postive |
| FANCD2    | AC092123.1 | 0.472172573 | 2.79E-31  | postive |
| HELLS     | AC092123.1 | 0.541468101 | 2.18E-42  | postive |
| ZNF419    | AC092123.1 | 0.518028205 | 2.43E-38  | postive |
| TUBE1     | AC092123.1 | 0.531128804 | 1.46E-40  | postive |
| ALOX12    | AC092123.1 | 0.725376619 | 3.80E-89  | postive |
| GABPB1    | AC092123.1 | 0.446785438 | 8.30E-28  | postive |
| DUOX1     | AC092123.1 | 0.419470327 | 2.20E-24  | postive |
| ATM       | AC092123.1 | 0.530938165 | 1.57E-40  | postive |
| FBXW7     | AC092123.1 | 0.44203196  | 3.45E-27  | postive |
| HELLS     | AL078459.1 | 0.460561296 | 1.18E-29  | postive |
| TUBE1     | AL078459.1 | 0.425544022 | 4.06E-25  | postive |
| ALOX12    | AL078459.1 | 0.414226061 | 9.24E-24  | postive |
| GABPB1    | AL078459.1 | 0.477538937 | 4.72E-32  | postive |
| LINC00472 | AL078459.1 | 0.476725139 | 6.19E-32  | postive |
| ATM       | AL078459.1 | 0.508187731 | 9.81E-37  | postive |
| FBXW7     | AL078459.1 | 0.458798634 | 2.05E-29  | postive |
| HELLS     | SOS1-IT1   | 0.500294441 | 1.75E-35  | postive |
| KLHL24    | SOS1-IT1   | 0.541883736 | 1.84E-42  | postive |
| TUBE1     | SOS1-IT1   | 0.481771498 | 1.14E-32  | postive |
| IREB2     | SOS1-IT1   | 0.51905041  | 1.64E-38  | postive |
| GABPB1    | SOS1-IT1   | 0.604592964 | 5.02E-55  | postive |
| PIK3CA    | SOS1-IT1   | 0.537820801 | 9.77E-42  | postive |
| KRAS      | SOS1-IT1   | 0.475209567 | 1.02E-31  | postive |
| MAPK8     | SOS1-IT1   | 0.521501019 | 6.39E-39  | postive |
| LINC00472 | SOS1-IT1   | 0.869505438 | 1.24E-166 | postive |
| PRKAA1    | SOS1-IT1   | 0.449056058 | 4.17E-28  | postive |
| TGFBR1    | SOS1-IT1   | 0.405907431 | 8.52E-23  | postive |
| ATM       | SOS1-IT1   | 0.69293935  | 2.54E-78  | postive |
| FBXW7     | SOS1-IT1   | 0.479922774 | 2.12E-32  | postive |
| ZNF419    | AC007066.2 | 0.687229371 | 1.46E-76  | postive |
| VEGFA     | AC007066.2 | 0.429638144 | 1.27E-25  | postive |
| TUBE1     | AC007066.2 | 0.655724409 | 1.50E-67  | postive |
| SETD1B    | AC007066.2 | 0.461468714 | 8.83E-30  | postive |
| ALOX12    | AC007066.2 | 0.600503212 | 4.04E-54  | postive |
| GABPB1    | AC007066.2 | 0.630446031 | 4.59E-61  | postive |
| MAPK8     | AC007066.2 | 0.461827282 | 7.88E-30  | postive |
| LINC00472 | AC007066.2 | 0.465094883 | 2.78E-30  | postive |
| ATM       | AC007066.2 | 0.500483622 | 1.64E-35  | postive |
| TAZ       | AC007066.2 | 0.471768778 | 3.19E-31  | postive |

|           |            |              |           |          |
|-----------|------------|--------------|-----------|----------|
| FBXW7     | AC007066.2 | 0.44050275   | 5.42E-27  | postive  |
| HSF1      | LINC01311  | 0.448683086  | 4.67E-28  | postive  |
| ATF4      | LINC01311  | 0.439355027  | 7.61E-27  | postive  |
| ZNF419    | LINC01311  | 0.534046389  | 4.52E-41  | postive  |
| TUBE1     | LINC01311  | 0.42571963   | 3.86E-25  | postive  |
| DRD4      | LINC01311  | 0.43786577   | 1.18E-26  | postive  |
| ALOX12    | LINC01311  | 0.469612916  | 6.45E-31  | postive  |
| NCOA4     | LINC01311  | -0.428585694 | 1.72E-25  | negative |
| PHKG2     | LINC01311  | 0.640033773  | 1.88E-63  | postive  |
| ULK1      | LINC01311  | 0.429657281  | 1.27E-25  | postive  |
| TAZ       | LINC01311  | 0.776305488  | 1.06E-109 | postive  |
| RPL8      | SNHG32     | 0.465797276  | 2.22E-30  | postive  |
| FANCD2    | AC079684.1 | 0.413329922  | 1.18E-23  | postive  |
| HELLS     | AC079684.1 | 0.493998029  | 1.65E-34  | postive  |
| ZNF419    | AC079684.1 | 0.487965745  | 1.36E-33  | postive  |
| TUBE1     | AC079684.1 | 0.40997526   | 2.90E-23  | postive  |
| ALOX12    | AC079684.1 | 0.504001752  | 4.57E-36  | postive  |
| GABPB1    | AC079684.1 | 0.412137751  | 1.62E-23  | postive  |
| TAZ       | AC079684.1 | 0.456652623  | 4.01E-29  | postive  |
| FBXW7     | AC079684.1 | 0.417577911  | 3.71E-24  | postive  |
| FANCD2    | AC096642.1 | 0.425635115  | 3.96E-25  | postive  |
| HELLS     | AC096642.1 | 0.467026611  | 1.49E-30  | postive  |
| ALOX12    | AC096642.1 | 0.52845109   | 4.22E-40  | postive  |
| TFAP2C    | AC096642.1 | 0.488088644  | 1.30E-33  | postive  |
| HBA1      | AC096642.1 | 0.439563214  | 7.16E-27  | postive  |
| DUOX1     | AC096642.1 | 0.451686524  | 1.87E-28  | postive  |
| RRM2      | AL035446.1 | 0.441089446  | 4.56E-27  | postive  |
| AURKA     | AL035446.1 | 0.410083389  | 2.82E-23  | postive  |
| MAPK8     | AL050309.1 | 0.402448119  | 2.11E-22  | postive  |
| ZNF419    | AC005264.1 | 0.500672393  | 1.53E-35  | postive  |
| VEGFA     | AC005264.1 | 0.589559215  | 9.23E-52  | postive  |
| TUBE1     | AC005264.1 | 0.47431829   | 1.38E-31  | postive  |
| SETD1B    | AC005264.1 | 0.427503686  | 2.33E-25  | postive  |
| ALOX12    | AC005264.1 | 0.493476141  | 1.99E-34  | postive  |
| TAZ       | AC005264.1 | 0.532736105  | 7.65E-41  | postive  |
| ISCU      | KIF9-AS1   | 0.544381702  | 6.52E-43  | postive  |
| DDIT3     | KIF9-AS1   | 0.477084445  | 5.49E-32  | postive  |
| SLC2A12   | KIF9-AS1   | 0.495497549  | 9.73E-35  | postive  |
| ATG4D     | KIF9-AS1   | 0.437986884  | 1.14E-26  | postive  |
| GABARAPL1 | KIF9-AS1   | 0.60741827   | 1.17E-55  | postive  |
| BAP1      | KIF9-AS1   | 0.515868067  | 5.53E-38  | postive  |
| LPIN1     | KIF9-AS1   | 0.633798819  | 6.86E-62  | postive  |
| EIF2S1    | AL121603.2 | 0.430624488  | 9.60E-26  | postive  |
| HMGB1     | AL121603.2 | 0.517348346  | 3.15E-38  | postive  |
| NRAS      | AL121603.2 | 0.439780725  | 6.71E-27  | postive  |
| FANCD2    | AL591043.2 | 0.436482172  | 1.77E-26  | postive  |
| TFAP2C    | AL591043.2 | 0.422845103  | 8.65E-25  | postive  |
| STAT3     | AC125807.2 | 0.452244645  | 1.57E-28  | postive  |
| JDP2      | AC125807.2 | 0.437149243  | 1.45E-26  | postive  |
| ZFP69B    | AC125807.2 | 0.404904845  | 1.11E-22  | postive  |
| MAFG      | AC125807.2 | 0.469744079  | 6.18E-31  | postive  |
| ZEB1      | AC125807.2 | 0.461273482  | 9.39E-30  | postive  |
| EPAS1     | AC125807.2 | 0.436041645  | 2.01E-26  | postive  |
| PRKAA2    | AP001542.3 | 0.443779978  | 2.05E-27  | postive  |
| HELLS     | AC008957.1 | 0.459789647  | 1.50E-29  | postive  |
| GABPB1    | AC008957.1 | 0.444920088  | 1.45E-27  | postive  |
| CYBB      | AC008957.1 | 0.461606421  | 8.45E-30  | postive  |
| ATG7      | AC008957.1 | 0.57934636   | 1.22E-49  | postive  |

|           |            |              |           |          |
|-----------|------------|--------------|-----------|----------|
| LINC00472 | AC008957.1 | 0.453935886  | 9.33E-29  | postive  |
| TGFBR1    | AC008957.1 | 0.411569254  | 1.89E-23  | postive  |
| TLR4      | AC008957.1 | 0.444748085  | 1.53E-27  | postive  |
| ATM       | AC008957.1 | 0.655917377  | 1.33E-67  | postive  |
| FBXW7     | AC008957.1 | 0.408231588  | 4.61E-23  | postive  |
| BACH1     | AC008957.1 | 0.443942223  | 1.95E-27  | postive  |
| TFAP2C    | LINC02572  | 0.484207872  | 4.95E-33  | postive  |
| HBA1      | LINC02572  | 0.446054391  | 1.03E-27  | postive  |
| FANCD2    | WAKMAR2    | 0.415390462  | 6.73E-24  | postive  |
| HELLS     | WAKMAR2    | 0.486693015  | 2.11E-33  | postive  |
| ZNF419    | WAKMAR2    | 0.476723172  | 6.19E-32  | postive  |
| TUBE1     | WAKMAR2    | 0.515999808  | 5.26E-38  | postive  |
| ALOX12    | WAKMAR2    | 0.550397927  | 5.16E-44  | postive  |
| GABPB1    | WAKMAR2    | 0.567160878  | 3.33E-47  | postive  |
| TNFAIP3   | WAKMAR2    | 0.447528837  | 6.63E-28  | postive  |
| ATM       | WAKMAR2    | 0.55175547   | 2.89E-44  | postive  |
| FBXW7     | WAKMAR2    | 0.593195795  | 1.55E-52  | postive  |
| GPX4      | AP004609.3 | 0.410592774  | 2.46E-23  | postive  |
| HSPB1     | AP004609.3 | 0.421751046  | 1.17E-24  | postive  |
| HBA1      | AP004609.3 | 0.634412093  | 4.83E-62  | postive  |
| HRAS      | AP004609.3 | 0.764301484  | 2.17E-104 | postive  |
| MAP1LC3A  | AP004609.3 | 0.460200426  | 1.32E-29  | postive  |
| EGLN2     | AP004609.3 | 0.830795316  | 9.21E-139 | postive  |
| ZNF419    | ASH1L-AS1  | 0.403222276  | 1.72E-22  | postive  |
| TUBE1     | ASH1L-AS1  | 0.420122031  | 1.84E-24  | postive  |
| SETD1B    | ASH1L-AS1  | 0.416365253  | 5.16E-24  | postive  |
| ALOX12    | ASH1L-AS1  | 0.520338406  | 1.00E-38  | postive  |
| GABPB1    | ASH1L-AS1  | 0.44487728   | 1.47E-27  | postive  |
| LINC00472 | ASH1L-AS1  | 0.41273514   | 1.38E-23  | postive  |
| BRD4      | PDXDC2P-NI | 0.412335569  | 1.54E-23  | postive  |
| ZNF419    | PDXDC2P-NI | 0.600054706  | 5.06E-54  | postive  |
| VEGFA     | PDXDC2P-NI | 0.470590924  | 4.69E-31  | postive  |
| TUBE1     | PDXDC2P-NI | 0.57095954   | 5.95E-48  | postive  |
| SETD1B    | PDXDC2P-NI | 0.474591719  | 1.26E-31  | postive  |
| ALOX12    | PDXDC2P-NI | 0.604144403  | 6.32E-55  | postive  |
| PHKG2     | PDXDC2P-NI | 0.541482938  | 2.17E-42  | postive  |
| TAZ       | PDXDC2P-NI | 0.634196949  | 5.46E-62  | postive  |
| FBXW7     | PDXDC2P-NI | 0.440069783  | 6.16E-27  | postive  |
| NOX1      | AC069307.1 | 0.453790497  | 9.76E-29  | postive  |
| PHKG2     | AC069307.1 | 0.41136323   | 2.00E-23  | postive  |
| BECN1     | AC069307.1 | -0.412227081 | 1.58E-23  | negative |
| MAPK8     | AC021087.1 | 0.440091021  | 6.13E-27  | postive  |
| ATM       | AC021087.1 | 0.439056543  | 8.31E-27  | postive  |
| TUBE1     | AC087752.4 | 0.516285199  | 4.72E-38  | postive  |
| GABPB1    | AC087752.4 | 0.452206987  | 1.59E-28  | postive  |
| LINC00472 | AC087752.4 | 0.415757148  | 6.09E-24  | postive  |
| HELLS     | AC108727.1 | 0.407319951  | 5.87E-23  | postive  |
| KLHL24    | AC108727.1 | 0.482502905  | 8.86E-33  | postive  |
| GABPB1    | AC108727.1 | 0.496138836  | 7.75E-35  | postive  |
| LINC00472 | AC108727.1 | 0.832265295  | 1.10E-139 | postive  |
| ATM       | AC108727.1 | 0.442904165  | 2.66E-27  | postive  |
| PRKAA2    | AC004053.1 | 0.431457164  | 7.56E-26  | postive  |
| ATM       | AC004053.1 | 0.570277326  | 8.12E-48  | postive  |
| ALOX12    | NOP53-AS1  | 0.414477013  | 8.63E-24  | postive  |
| ATM       | NOP53-AS1  | 0.574480946  | 1.18E-48  | postive  |
| VEGFA     | LINC02048  | 0.402234745  | 2.23E-22  | postive  |
| TUBE1     | LINC02048  | 0.445988811  | 1.05E-27  | postive  |
| ALOX12    | LINC02048  | 0.542609045  | 1.36E-42  | postive  |

|           |            |              |           |          |
|-----------|------------|--------------|-----------|----------|
| ATM       | LINC02048  | 0.489588084  | 7.75E-34  | postive  |
| TAZ       | LINC02048  | 0.406970056  | 6.44E-23  | postive  |
| LINC00472 | AC091982.1 | 0.45832804   | 2.38E-29  | postive  |
| ATM       | AC091982.1 | 0.510219043  | 4.62E-37  | postive  |
| PHKG2     | AC003965.1 | 0.455185659  | 6.34E-29  | postive  |
| TFAP2C    | AL512274.1 | 0.462853396  | 5.69E-30  | postive  |
| HELLS     | AC005046.1 | 0.402798647  | 1.92E-22  | postive  |
| BRD4      | AC005046.1 | 0.417585846  | 3.70E-24  | postive  |
| ZNF419    | AC005046.1 | 0.4133024    | 1.19E-23  | postive  |
| ALOX12    | AC005046.1 | 0.443886929  | 1.98E-27  | postive  |
| TAZ       | AC005046.1 | 0.41036109   | 2.61E-23  | postive  |
| TFAP2C    | AC010422.4 | 0.46889218   | 8.15E-31  | postive  |
| HBA1      | AC010422.4 | 0.417003271  | 4.34E-24  | postive  |
| LINC00472 | AC010422.4 | 0.55437583   | 9.38E-45  | postive  |
| HELLS     | AKT3-IT1   | 0.544241149  | 6.91E-43  | postive  |
| TUBE1     | AKT3-IT1   | 0.410002438  | 2.88E-23  | postive  |
| ALOX12    | AKT3-IT1   | 0.428037732  | 2.01E-25  | postive  |
| GABPB1    | AKT3-IT1   | 0.553631455  | 1.29E-44  | postive  |
| LINC00472 | AKT3-IT1   | 0.730238042  | 6.64E-91  | postive  |
| ATM       | AKT3-IT1   | 0.627090937  | 3.00E-60  | postive  |
| FBXW7     | AKT3-IT1   | 0.486975189  | 1.92E-33  | postive  |
| HELLS     | AC018752.1 | 0.481420703  | 1.28E-32  | postive  |
| MTOR      | AC018752.1 | 0.451950135  | 1.72E-28  | postive  |
| KLHL24    | AC018752.1 | 0.427823311  | 2.13E-25  | postive  |
| MAP3K5    | AC018752.1 | 0.423280815  | 7.66E-25  | postive  |
| ALOX12    | AC018752.1 | 0.402693905  | 1.98E-22  | postive  |
| IREB2     | AC018752.1 | 0.609449821  | 4.06E-56  | postive  |
| GABPB1    | AC018752.1 | 0.520251152  | 1.03E-38  | postive  |
| PIK3CA    | AC018752.1 | 0.540031459  | 3.95E-42  | postive  |
| KRAS      | AC018752.1 | 0.436130159  | 1.96E-26  | postive  |
| ATG7      | AC018752.1 | 0.460799889  | 1.09E-29  | postive  |
| MAPK8     | AC018752.1 | 0.554812833  | 7.76E-45  | postive  |
| LINC00472 | AC018752.1 | 0.658484578  | 2.69E-68  | postive  |
| PRKAA2    | AC018752.1 | 0.563960893  | 1.40E-46  | postive  |
| PRKAA1    | AC018752.1 | 0.46292023   | 5.57E-30  | postive  |
| TLR4      | AC018752.1 | 0.437502215  | 1.31E-26  | postive  |
| ATM       | AC018752.1 | 0.764433054  | 1.90E-104 | postive  |
| FBXW7     | AC018752.1 | 0.42515555   | 4.53E-25  | postive  |
| BACH1     | AC018752.1 | 0.433081493  | 4.74E-26  | postive  |
| GCLC      | PAXIP1-AS2 | 0.447551381  | 6.58E-28  | postive  |
| MTOR      | PAXIP1-AS2 | 0.483291027  | 6.77E-33  | postive  |
| OXSR1     | PAXIP1-AS2 | 0.40173816   | 2.54E-22  | postive  |
| KLHL24    | PAXIP1-AS2 | 0.545790743  | 3.61E-43  | postive  |
| MAP3K5    | PAXIP1-AS2 | 0.497386143  | 4.97E-35  | postive  |
| MAPK14    | PAXIP1-AS2 | 0.42718202   | 2.56E-25  | postive  |
| EIF2AK4   | PAXIP1-AS2 | 0.504386237  | 3.97E-36  | postive  |
| IREB2     | PAXIP1-AS2 | 0.680038304  | 2.09E-74  | postive  |
| SP1       | PAXIP1-AS2 | 0.553969164  | 1.12E-44  | postive  |
| PIK3CA    | PAXIP1-AS2 | 0.60395328   | 6.97E-55  | postive  |
| KRAS      | PAXIP1-AS2 | 0.484873128  | 3.95E-33  | postive  |
| HRAS      | PAXIP1-AS2 | -0.462128537 | 7.16E-30  | negative |
| SLC38A1   | PAXIP1-AS2 | 0.451904082  | 1.75E-28  | postive  |
| BECN1     | PAXIP1-AS2 | 0.433040951  | 4.80E-26  | postive  |
| MAPK8     | PAXIP1-AS2 | 0.496985535  | 5.73E-35  | postive  |
| MAPK9     | PAXIP1-AS2 | 0.433978931  | 3.66E-26  | postive  |
| LINC00472 | PAXIP1-AS2 | 0.415827044  | 5.98E-24  | postive  |
| PRKAA2    | PAXIP1-AS2 | 0.470806179  | 4.37E-31  | postive  |
| PRKAA1    | PAXIP1-AS2 | 0.525688009  | 1.25E-39  | postive  |

|           |            |             |           |         |
|-----------|------------|-------------|-----------|---------|
| ANO6      | PAXIP1-AS2 | 0.429157794 | 1.46E-25  | postive |
| TLR4      | PAXIP1-AS2 | 0.434003193 | 3.63E-26  | postive |
| ATM       | PAXIP1-AS2 | 0.519422224 | 1.42E-38  | postive |
| SIRT1     | PAXIP1-AS2 | 0.421823399 | 1.15E-24  | postive |
| HELLS     | AP000223.1 | 0.50858422  | 8.47E-37  | postive |
| TUBE1     | AP000223.1 | 0.424825645 | 4.97E-25  | postive |
| GABPB1    | AP000223.1 | 0.504096472 | 4.41E-36  | postive |
| LINC00472 | AP000223.1 | 0.6259695   | 5.60E-60  | postive |
| ATM       | AP000223.1 | 0.626608708 | 3.93E-60  | postive |
| FBXW7     | AP000223.1 | 0.419450213 | 2.22E-24  | postive |
| ISCU      | AL138756.1 | 0.513752742 | 1.23E-37  | postive |
| KLHL24    | AL138756.1 | 0.539799492 | 4.35E-42  | postive |
| GABARAPL1 | AL138756.1 | 0.626868828 | 3.40E-60  | postive |
| LINC00472 | AL138756.1 | 0.580659018 | 6.59E-50  | postive |
| LPIN1     | AL138756.1 | 0.632890454 | 1.15E-61  | postive |
| NCF2      | AC002091.2 | 0.574475533 | 1.18E-48  | postive |
| CYBB      | AC002091.2 | 0.563781937 | 1.52E-46  | postive |
| ATG7      | AC002091.2 | 0.40066691  | 3.35E-22  | postive |
| ALOX15B   | AC002091.2 | 0.412889412 | 1.33E-23  | postive |
| TLR4      | AC002091.2 | 0.421620843 | 1.22E-24  | postive |
| RB1       | AC021483.2 | 0.424415495 | 5.57E-25  | postive |
| GCLC      | AC021483.2 | 0.401156095 | 2.95E-22  | postive |
| IREB2     | AC021483.2 | 0.590628193 | 5.48E-52  | postive |
| PIK3CA    | AC021483.2 | 0.427031891 | 2.67E-25  | postive |
| NRAS      | AC021483.2 | 0.411328113 | 2.02E-23  | postive |
| KRAS      | AC021483.2 | 0.429223832 | 1.43E-25  | postive |
| NCOA4     | AC021483.2 | 0.425221488 | 4.44E-25  | postive |
| MAPK1     | AC021483.2 | 0.525808986 | 1.19E-39  | postive |
| MAPK8     | AC021483.2 | 0.541435715 | 2.21E-42  | postive |
| PRKAA2    | AC021483.2 | 0.638442668 | 4.74E-63  | postive |
| PRKAA1    | AC021483.2 | 0.458711519 | 2.11E-29  | postive |
| ATM       | AC021483.2 | 0.631087441 | 3.20E-61  | postive |
| SIRT1     | AC021483.2 | 0.438770907 | 9.04E-27  | postive |
| ISCU      | AC010776.3 | 0.499124895 | 2.67E-35  | postive |
| GPT2      | AC010776.3 | 0.415233592 | 7.03E-24  | postive |
| HERPUD1   | AC010776.3 | 0.436036721 | 2.01E-26  | postive |
| KLHL24    | AC010776.3 | 0.571808051 | 4.04E-48  | postive |
| SLC2A12   | AC010776.3 | 0.505767999 | 2.39E-36  | postive |
| ATG4D     | AC010776.3 | 0.410485893 | 2.53E-23  | postive |
| GABARAPL1 | AC010776.3 | 0.720158787 | 2.66E-87  | postive |
| WIP1      | AC010776.3 | 0.514120808 | 1.07E-37  | postive |
| LINC00472 | AC010776.3 | 0.518308395 | 2.18E-38  | postive |
| LPIN1     | AC010776.3 | 0.591872858 | 2.98E-52  | postive |
| HELLS     | AC005070.3 | 0.539154873 | 5.66E-42  | postive |
| KLHL24    | AC005070.3 | 0.466689373 | 1.66E-30  | postive |
| TUBE1     | AC005070.3 | 0.451399649 | 2.04E-28  | postive |
| ALOX12    | AC005070.3 | 0.405677408 | 9.05E-23  | postive |
| IREB2     | AC005070.3 | 0.439126839 | 8.14E-27  | postive |
| GABPB1    | AC005070.3 | 0.599313466 | 7.36E-54  | postive |
| PIK3CA    | AC005070.3 | 0.442332282 | 3.15E-27  | postive |
| ATG7      | AC005070.3 | 0.444280796 | 1.76E-27  | postive |
| MAPK8     | AC005070.3 | 0.445295788 | 1.30E-27  | postive |
| LINC00472 | AC005070.3 | 0.833039727 | 3.54E-140 | postive |
| ATM       | AC005070.3 | 0.715687849 | 9.38E-86  | postive |
| FBXW7     | AC005070.3 | 0.503648279 | 5.19E-36  | postive |
| HELLS     | MYLK-AS1   | 0.447919039 | 5.89E-28  | postive |
| TUBE1     | MYLK-AS1   | 0.435215091 | 2.56E-26  | postive |
| ALOX12    | MYLK-AS1   | 0.421355679 | 1.31E-24  | postive |

|           |             |             |           |         |
|-----------|-------------|-------------|-----------|---------|
| GABPB1    | MYLK-AS1    | 0.457371787 | 3.21E-29  | postive |
| LINC00472 | MYLK-AS1    | 0.539525071 | 4.86E-42  | postive |
| ATM       | MYLK-AS1    | 0.496576727 | 6.63E-35  | postive |
| FBXW7     | MYLK-AS1    | 0.409779953 | 3.05E-23  | postive |
| MTOR      | ZKSCAN7-AS  | 0.435399129 | 2.42E-26  | postive |
| ZNF419    | ZKSCAN7-AS  | 0.421808022 | 1.15E-24  | postive |
| KLHL24    | ZKSCAN7-AS  | 0.541528646 | 2.13E-42  | postive |
| IREB2     | ZKSCAN7-AS  | 0.503501528 | 5.48E-36  | postive |
| GABPB1    | ZKSCAN7-AS  | 0.483171351 | 7.05E-33  | postive |
| PIK3CA    | ZKSCAN7-AS  | 0.516247077 | 4.78E-38  | postive |
| ATG7      | ZKSCAN7-AS  | 0.423648656 | 6.91E-25  | postive |
| MAPK8     | ZKSCAN7-AS  | 0.446397434 | 9.33E-28  | postive |
| LINC00472 | ZKSCAN7-AS  | 0.636918631 | 1.15E-62  | postive |
| PRKAA1    | ZKSCAN7-AS  | 0.425555275 | 4.05E-25  | postive |
| LPIN1     | ZKSCAN7-AS  | 0.495648941 | 9.22E-35  | postive |
| ATM       | ZKSCAN7-AS  | 0.516098354 | 5.06E-38  | postive |
| HELLS     | AC016590.2  | 0.42817427  | 1.93E-25  | postive |
| KLHL24    | AC016590.2  | 0.564791126 | 9.66E-47  | postive |
| TUBE1     | AC016590.2  | 0.420330495 | 1.74E-24  | postive |
| IREB2     | AC016590.2  | 0.488929445 | 9.75E-34  | postive |
| GABPB1    | AC016590.2  | 0.555953622 | 4.74E-45  | postive |
| PIK3CA    | AC016590.2  | 0.504147206 | 4.33E-36  | postive |
| KRAS      | AC016590.2  | 0.415659467 | 6.26E-24  | postive |
| MAPK8     | AC016590.2  | 0.461872212 | 7.77E-30  | postive |
| LINC00472 | AC016590.2  | 0.914731213 | 1.73E-213 | postive |
| PRKAA1    | AC016590.2  | 0.422217894 | 1.03E-24  | postive |
| ATM       | AC016590.2  | 0.679609121 | 2.80E-74  | postive |
| FBXW7     | AC016590.2  | 0.478594217 | 3.31E-32  | postive |
| TUBE1     | AC078922.1  | 0.483363421 | 6.61E-33  | postive |
| ALOX12    | AC078922.1  | 0.474577996 | 1.26E-31  | postive |
| TUBE1     | ADAMTS9-A   | 0.458278941 | 2.41E-29  | postive |
| ALOX12    | ADAMTS9-A   | 0.416983339 | 4.36E-24  | postive |
| PEBP1     | ADAMTS9-A   | 0.402938659 | 1.86E-22  | postive |
| MIOX      | ADAMTS9-A   | 0.455033169 | 6.64E-29  | postive |
| HELLS     | AC009061.2  | 0.415028062 | 7.43E-24  | postive |
| ZNF419    | AC009061.2  | 0.401178308 | 2.93E-22  | postive |
| ALOX12    | AC009061.2  | 0.404028748 | 1.40E-22  | postive |
| PHKG2     | AC009061.2  | 0.455546541 | 5.66E-29  | postive |
| SLC2A12   | LINC00645   | 0.77320953  | 2.66E-108 | postive |
| WIPI2     | LINC00645   | 0.543528758 | 9.30E-43  | postive |
| ISCU      | AL139275.2  | 0.400377716 | 3.61E-22  | postive |
| ACO1      | AL139275.2  | 0.520096867 | 1.10E-38  | postive |
| TUBE1     | AL133338.1  | 0.430198115 | 1.08E-25  | postive |
| OXSR1     | ACVR2B-AS1  | 0.40966567  | 3.15E-23  | postive |
| HELLS     | AC245884.10 | 0.532771301 | 7.54E-41  | postive |
| ZNF419    | AC245884.10 | 0.454928145 | 6.86E-29  | postive |
| TUBE1     | AC245884.10 | 0.436187715 | 1.93E-26  | postive |
| ALOX12    | AC245884.10 | 0.534948258 | 3.14E-41  | postive |
| GABPB1    | AC245884.10 | 0.504114544 | 4.38E-36  | postive |
| LINC00472 | AC245884.10 | 0.648686407 | 1.11E-65  | postive |
| ATM       | AC245884.10 | 0.560221198 | 7.34E-46  | postive |
| FBXW7     | AC245884.10 | 0.469969565 | 5.74E-31  | postive |
| ISCU      | EMSLR       | 0.450181017 | 2.96E-28  | postive |
| ASNS      | EMSLR       | 0.44720895  | 7.30E-28  | postive |
| DDIT3     | EMSLR       | 0.499618846 | 2.23E-35  | postive |
| GABARAPL1 | EMSLR       | 0.492042308 | 3.29E-34  | postive |
| WIPI2     | EMSLR       | 0.429414528 | 1.36E-25  | postive |
| HELLS     | WWTR1-IT1   | 0.502080191 | 9.18E-36  | postive |

|           |            |              |          |          |
|-----------|------------|--------------|----------|----------|
| ALOX12    | WWTR1-IT1  | 0.430545662  | 9.82E-26 | postive  |
| TFAP2C    | WWTR1-IT1  | 0.432108512  | 6.27E-26 | postive  |
| HBA1      | WWTR1-IT1  | 0.404485908  | 1.24E-22 | postive  |
| GABPB1    | WWTR1-IT1  | 0.429675966  | 1.26E-25 | postive  |
| DUOX1     | WWTR1-IT1  | 0.444742931  | 1.53E-27 | postive  |
| LINC00472 | WWTR1-IT1  | 0.522777648  | 3.90E-39 | postive  |
| ATM       | WWTR1-IT1  | 0.449831429  | 3.29E-28 | postive  |
| FBXW7     | WWTR1-IT1  | 0.408057852  | 4.83E-23 | postive  |
| ZNF419    | HNRNPD-DT  | 0.431938608  | 6.59E-26 | postive  |
| HRAS      | HNRNPD-DT  | 0.401770698  | 2.51E-22 | postive  |
| NCOA4     | HNRNPD-DT  | -0.404891399 | 1.11E-22 | negative |
| PHKG2     | HNRNPD-DT  | 0.545392849  | 4.27E-43 | postive  |
| TAZ       | HNRNPD-DT  | 0.636204711  | 1.73E-62 | postive  |
| HELLS     | AC067852.3 | 0.430572591  | 9.75E-26 | postive  |
| ZNF419    | AC067852.3 | 0.415818147  | 5.99E-24 | postive  |
| VEGFA     | AC067852.3 | 0.435651609  | 2.25E-26 | postive  |
| TUBE1     | AC067852.3 | 0.592654112  | 2.03E-52 | postive  |
| SETD1B    | AC067852.3 | 0.476433002  | 6.82E-32 | postive  |
| ALOX12    | AC067852.3 | 0.727733111  | 5.40E-90 | postive  |
| GABPB1    | AC067852.3 | 0.402537718  | 2.06E-22 | postive  |
| MAPK8     | AC067852.3 | 0.480825123  | 1.56E-32 | postive  |
| LINC00472 | AC067852.3 | 0.416800946  | 4.58E-24 | postive  |
| ATM       | AC067852.3 | 0.682999249  | 2.75E-75 | postive  |
| FBXW7     | AC067852.3 | 0.452089842  | 1.65E-28 | postive  |
| EIF2S1    | MIR100HG   | 0.427085568  | 2.63E-25 | postive  |
| CDKN2A    | MIR100HG   | 0.448692673  | 4.66E-28 | postive  |
| LINC00472 | MIR100HG   | 0.499237523  | 2.56E-35 | postive  |
| LPIN1     | MIR100HG   | 0.420912548  | 1.48E-24 | postive  |
| ZNF419    | AC106782.5 | 0.407749233  | 5.24E-23 | postive  |
| VEGFA     | AC106782.5 | 0.443218352  | 2.42E-27 | postive  |
| DRD4      | AC106782.5 | 0.415703989  | 6.18E-24 | postive  |
| ALOX12    | AC106782.5 | 0.546410239  | 2.79E-43 | postive  |
| NCOA4     | AC106782.5 | -0.421355628 | 1.31E-24 | negative |
| PHKG2     | AC106782.5 | 0.538245708  | 8.21E-42 | postive  |
| TAZ       | AC106782.5 | 0.663953133  | 8.48E-70 | postive  |
| HELLS     | AC124312.3 | 0.428774183  | 1.63E-25 | postive  |
| MTOR      | AC124312.3 | 0.43601816   | 2.02E-26 | postive  |
| KLHL24    | AC124312.3 | 0.512227571  | 2.18E-37 | postive  |
| MAP3K5    | AC124312.3 | 0.416603503  | 4.84E-24 | postive  |
| IREB2     | AC124312.3 | 0.455684318  | 5.43E-29 | postive  |
| GABPB1    | AC124312.3 | 0.51633122   | 4.63E-38 | postive  |
| PIK3CA    | AC124312.3 | 0.476567755  | 6.52E-32 | postive  |
| ATG7      | AC124312.3 | 0.489551234  | 7.85E-34 | postive  |
| MAPK8     | AC124312.3 | 0.402848465  | 1.90E-22 | postive  |
| LINC00472 | AC124312.3 | 0.62955705   | 7.57E-61 | postive  |
| PRKAA2    | AC124312.3 | 0.401782147  | 2.51E-22 | postive  |
| PRKAA1    | AC124312.3 | 0.456033618  | 4.87E-29 | postive  |
| ATM       | AC124312.3 | 0.696184109  | 2.44E-79 | postive  |
| FBXW7     | AC124312.3 | 0.544817054  | 5.43E-43 | postive  |
| FANCD2    | PANK2-AS1  | 0.447865171  | 5.99E-28 | postive  |
| HELLS     | PANK2-AS1  | 0.422291939  | 1.01E-24 | postive  |
| ALOX12    | PANK2-AS1  | 0.459049413  | 1.89E-29 | postive  |
| TAZ       | AC090578.2 | 0.417668362  | 3.62E-24 | postive  |
| GPX4      | AC006942.1 | 0.459613563  | 1.59E-29 | postive  |
| RB1       | AC006942.1 | -0.450045295 | 3.08E-28 | negative |
| HSF1      | AC006942.1 | 0.482218327  | 9.75E-33 | postive  |
| STAT3     | AC006942.1 | -0.493322373 | 2.10E-34 | negative |
| ISCU      | AC006942.1 | 0.411674244  | 1.84E-23 | postive  |



|           |            |              |          |          |
|-----------|------------|--------------|----------|----------|
| OTUB1     | AC006942.1 | 0.465127758  | 2.75E-30 | postive  |
| DDIT3     | AC006942.1 | 0.474740189  | 1.20E-31 | postive  |
| MAPK14    | AC006942.1 | -0.449149282 | 4.05E-28 | negative |
| NRAS      | AC006942.1 | -0.503556073 | 5.37E-36 | negative |
| NCOA4     | AC006942.1 | -0.406622896 | 7.06E-23 | negative |
| PHKG2     | AC006942.1 | 0.47788001   | 4.21E-32 | postive  |
| ATG4D     | AC006942.1 | 0.589961915  | 7.59E-52 | postive  |
| BECN1     | AC006942.1 | -0.410474635 | 2.54E-23 | negative |
| MAP1LC3A  | AC006942.1 | 0.537690388  | 1.03E-41 | postive  |
| MAPK1     | AC006942.1 | -0.425878306 | 3.69E-25 | negative |
| ANO6      | AC006942.1 | -0.466357748 | 1.85E-30 | negative |
| TAZ       | AC006942.1 | 0.492060175  | 3.27E-34 | postive  |
| MTDH      | AC006942.1 | -0.441683785 | 3.82E-27 | negative |
| BACH1     | AC006942.1 | -0.415188172 | 7.11E-24 | negative |
| HELLS     | INE1       | 0.406534932  | 7.22E-23 | postive  |
| BRD4      | INE1       | 0.469761417  | 6.14E-31 | postive  |
| ZNF419    | INE1       | 0.574036429  | 1.45E-48 | postive  |
| VEGFA     | INE1       | 0.451168164  | 2.19E-28 | postive  |
| TUBE1     | INE1       | 0.546667425  | 2.50E-43 | postive  |
| SETD1B    | INE1       | 0.569762754  | 1.03E-47 | postive  |
| ALOX12    | INE1       | 0.585713965  | 5.93E-51 | postive  |
| GABPB1    | INE1       | 0.440898917  | 4.82E-27 | postive  |
| LINC00472 | INE1       | 0.44638061   | 9.38E-28 | postive  |
| ATM       | INE1       | 0.455402746  | 5.92E-29 | postive  |
| TAZ       | INE1       | 0.464628642  | 3.22E-30 | postive  |
| FBXW7     | INE1       | 0.437203571  | 1.43E-26 | postive  |
| MUC1      | SEMA3B-AS1 | 0.433702749  | 3.96E-26 | postive  |
| ISCU      | SEMA3B-AS1 | 0.479634317  | 2.34E-32 | postive  |
| DDIT3     | SEMA3B-AS1 | 0.499903158  | 2.02E-35 | postive  |
| SLC2A8    | SEMA3B-AS1 | 0.6024551    | 1.50E-54 | postive  |
| ATG4D     | SEMA3B-AS1 | 0.445125898  | 1.37E-27 | postive  |
| MAP1LC3A  | SEMA3B-AS1 | 0.606211348  | 2.18E-55 | postive  |
| GABARAPL1 | SEMA3B-AS1 | 0.514467969  | 9.39E-38 | postive  |
| SCP2      | AC007485.1 | 0.418294321  | 3.05E-24 | postive  |
| RB1       | AP001486.2 | 0.52599353   | 1.11E-39 | postive  |
| OXSR1     | AP001486.2 | 0.438985458  | 8.49E-27 | postive  |
| TUBE1     | AP001486.2 | 0.517525358  | 2.94E-38 | postive  |
| IREB2     | AP001486.2 | 0.541190441  | 2.45E-42 | postive  |
| HMGB1     | AP001486.2 | 0.477883382  | 4.20E-32 | postive  |
| SP1       | AP001486.2 | 0.422874324  | 8.57E-25 | postive  |
| GABPB1    | AP001486.2 | 0.564810772  | 9.58E-47 | postive  |
| EMC2      | AP001486.2 | 0.445534411  | 1.21E-27 | postive  |
| PIK3CA    | AP001486.2 | 0.443109641  | 2.50E-27 | postive  |
| NRAS      | AP001486.2 | 0.437297237  | 1.39E-26 | postive  |
| KRAS      | AP001486.2 | 0.476018924  | 7.83E-32 | postive  |
| ULK2      | AP001486.2 | 0.426040493  | 3.53E-25 | postive  |
| MAPK1     | AP001486.2 | 0.426531299  | 3.07E-25 | postive  |
| ZEB1      | AP001486.2 | 0.509524788  | 5.98E-37 | postive  |
| MAPK8     | AP001486.2 | 0.673832713  | 1.36E-72 | postive  |
| PRKAA2    | AP001486.2 | 0.611491029  | 1.39E-56 | postive  |
| PRKAA1    | AP001486.2 | 0.545389938  | 4.28E-43 | postive  |
| ATM       | AP001486.2 | 0.603687984  | 7.98E-55 | postive  |
| SIRT1     | AP001486.2 | 0.547409788  | 1.83E-43 | postive  |
| BAP1      | ILF3-DT    | 0.413874991  | 1.02E-23 | postive  |
| EGLN2     | ILF3-DT    | 0.407819091  | 5.14E-23 | postive  |
| SLC1A4    | MIR1915HG  | 0.419762228  | 2.03E-24 | postive  |
| MAPK3     | MIR1915HG  | 0.474170543  | 1.45E-31 | postive  |
| ZEB1      | MIR1915HG  | 0.420032942  | 1.89E-24 | postive  |

|           |            |              |          |          |
|-----------|------------|--------------|----------|----------|
| EPAS1     | MIR1915HG  | 0.456664043  | 4.00E-29 | postive  |
| HELLS     | AC096992.2 | 0.436693068  | 1.66E-26 | postive  |
| ZNF419    | AC096992.2 | 0.454594634  | 7.61E-29 | postive  |
| TUBE1     | AC096992.2 | 0.595664608  | 4.57E-53 | postive  |
| SETD1B    | AC096992.2 | 0.404274516  | 1.31E-22 | postive  |
| ALOX12    | AC096992.2 | 0.60113187   | 2.94E-54 | postive  |
| SP1       | AC096992.2 | 0.414345199  | 8.94E-24 | postive  |
| GABPB1    | AC096992.2 | 0.521308442  | 6.88E-39 | postive  |
| MAPK8     | AC096992.2 | 0.424127105  | 6.04E-25 | postive  |
| ATM       | AC096992.2 | 0.672499941  | 3.28E-72 | postive  |
| FBXW7     | AC096992.2 | 0.453529485  | 1.06E-28 | postive  |
| MAPK14    | AL606489.1 | 0.427939528  | 2.06E-25 | postive  |
| ALOX12    | AL606489.1 | 0.401351441  | 2.80E-22 | postive  |
| ATM       | AL606489.1 | 0.494743871  | 1.27E-34 | postive  |
| GPX4      | FLJ20021   | 0.543350739  | 1.00E-42 | postive  |
| RB1       | FLJ20021   | -0.407903206 | 5.03E-23 | negative |
| STAT3     | FLJ20021   | -0.441609385 | 3.91E-27 | negative |
| MTOR      | FLJ20021   | -0.421594123 | 1.22E-24 | negative |
| OTUB1     | FLJ20021   | 0.507913644  | 1.09E-36 | postive  |
| RPL8      | FLJ20021   | 0.627123057  | 2.95E-60 | postive  |
| MAPK14    | FLJ20021   | -0.445891745 | 1.09E-27 | negative |
| RIPK1     | FLJ20021   | -0.407374537 | 5.79E-23 | negative |
| KRAS      | FLJ20021   | -0.402500775 | 2.08E-22 | negative |
| HRAS      | FLJ20021   | 0.559313072  | 1.09E-45 | postive  |
| BECN1     | FLJ20021   | -0.417963455 | 3.33E-24 | negative |
| MAP1LC3A  | FLJ20021   | 0.486884205  | 1.98E-33 | postive  |
| ANO6      | FLJ20021   | -0.415096946 | 7.29E-24 | negative |
| FANCD2    | AC016394.1 | 0.43960996   | 7.06E-27 | postive  |
| HELLS     | AC016394.1 | 0.673643884  | 1.54E-72 | postive  |
| ZNF419    | AC016394.1 | 0.431065998  | 8.46E-26 | postive  |
| TUBE1     | AC016394.1 | 0.514322079  | 9.92E-38 | postive  |
| ALOX12    | AC016394.1 | 0.500428327  | 1.67E-35 | postive  |
| GABPB1    | AC016394.1 | 0.553133694  | 1.60E-44 | postive  |
| ATG7      | AC016394.1 | 0.41000061   | 2.88E-23 | postive  |
| LINC00472 | AC016394.1 | 0.55274336   | 1.89E-44 | postive  |
| ATM       | AC016394.1 | 0.646862194  | 3.31E-65 | postive  |
| FBXW7     | AC016394.1 | 0.469986804  | 5.71E-31 | postive  |
| HELLS     | AL137244.1 | 0.415786911  | 6.05E-24 | postive  |
| ZNF419    | AL137244.1 | 0.50961504   | 5.78E-37 | postive  |
| TUBE1     | AL137244.1 | 0.555479453  | 5.82E-45 | postive  |
| ALOX12    | AL137244.1 | 0.470872403  | 4.27E-31 | postive  |
| GABPB1    | AL137244.1 | 0.51465801   | 8.74E-38 | postive  |
| LINC00472 | AL137244.1 | 0.720459648  | 2.09E-87 | postive  |
| LPIN1     | AL137244.1 | 0.421194273  | 1.37E-24 | postive  |
| ATM       | AL137244.1 | 0.512078339  | 2.31E-37 | postive  |
| FBXW7     | AL137244.1 | 0.425834084  | 3.74E-25 | postive  |
| HELLS     | AC092755.1 | 0.528557077  | 4.05E-40 | postive  |
| TUBE1     | AC092755.1 | 0.479357352  | 2.56E-32 | postive  |
| ALOX12    | AC092755.1 | 0.414817936  | 7.87E-24 | postive  |
| GABPB1    | AC092755.1 | 0.585651318  | 6.11E-51 | postive  |
| ATG7      | AC092755.1 | 0.447993534  | 5.76E-28 | postive  |
| MAPK8     | AC092755.1 | 0.422719559  | 8.95E-25 | postive  |
| LINC00472 | AC092755.1 | 0.587306854  | 2.75E-51 | postive  |
| ATM       | AC092755.1 | 0.74993439   | 1.95E-98 | postive  |
| FBXW7     | AC092755.1 | 0.551858701  | 2.77E-44 | postive  |
| HSPA5     | AC004148.1 | -0.426549001 | 3.06E-25 | negative |
| BRD4      | AC004148.1 | 0.441243877  | 4.36E-27 | postive  |
| ZNF419    | AC004148.1 | 0.634075973  | 5.85E-62 | postive  |

|           |            |             |           |         |
|-----------|------------|-------------|-----------|---------|
| VEGFA     | AC004148.1 | 0.534069851 | 4.47E-41  | postive |
| TUBE1     | AC004148.1 | 0.646486682 | 4.15E-65  | postive |
| SETD1B    | AC004148.1 | 0.507470327 | 1.28E-36  | postive |
| DRD4      | AC004148.1 | 0.434250906 | 3.38E-26  | postive |
| ALOX12    | AC004148.1 | 0.694140426 | 1.07E-78  | postive |
| PHKG2     | AC004148.1 | 0.535265269 | 2.76E-41  | postive |
| TAZ       | AC004148.1 | 0.736400488 | 3.46E-93  | postive |
| FBXW7     | AC004148.1 | 0.427173242 | 2.56E-25  | postive |
| HELLS     | LRIG2-DT   | 0.601065046 | 3.04E-54  | postive |
| TUBE1     | LRIG2-DT   | 0.456351095 | 4.41E-29  | postive |
| ALOX12    | LRIG2-DT   | 0.53573959  | 2.28E-41  | postive |
| GABPB1    | LRIG2-DT   | 0.536988552 | 1.37E-41  | postive |
| LINC00472 | LRIG2-DT   | 0.586436287 | 4.19E-51  | postive |
| ATM       | LRIG2-DT   | 0.666794092 | 1.37E-70  | postive |
| FBXW7     | LRIG2-DT   | 0.474574247 | 1.26E-31  | postive |
| ISCU      | HOXB-AS3   | 0.609278439 | 4.44E-56  | postive |
| DDIT3     | HOXB-AS3   | 0.443509869 | 2.22E-27  | postive |
| SLC2A8    | HOXB-AS3   | 0.442436366 | 3.06E-27  | postive |
| ATG4D     | HOXB-AS3   | 0.61953191  | 1.91E-58  | postive |
| MAP1LC3A  | HOXB-AS3   | 0.584500373 | 1.06E-50  | postive |
| GABARAPL2 | HOXB-AS3   | 0.508283865 | 9.47E-37  | postive |
| GABARAPL1 | HOXB-AS3   | 0.525328882 | 1.44E-39  | postive |
| BAP1      | HOXB-AS3   | 0.421117354 | 1.40E-24  | postive |
| LPIN1     | HOXB-AS3   | 0.46500268  | 2.86E-30  | postive |
| FANCD2    | AL021707.2 | 0.41567353  | 6.23E-24  | postive |
| HELLS     | AL021707.2 | 0.424495048 | 5.45E-25  | postive |
| ZNF419    | AL021707.2 | 0.507741816 | 1.16E-36  | postive |
| TUBE1     | AL021707.2 | 0.44627656  | 9.67E-28  | postive |
| ALOX12    | AL021707.2 | 0.599420455 | 6.97E-54  | postive |
| DUOX1     | AL021707.2 | 0.406864926 | 6.62E-23  | postive |
| TFAP2C    | AC019080.3 | 0.572306926 | 3.21E-48  | postive |
| HBA1      | AC019080.3 | 0.512082361 | 2.30E-37  | postive |
| DUOX1     | AC019080.3 | 0.421406686 | 1.29E-24  | postive |
| ISCU      | AC090515.2 | 0.51543402  | 6.51E-38  | postive |
| SLC2A8    | AC090515.2 | 0.419561397 | 2.15E-24  | postive |
| TFAP2C    | AC090515.2 | 0.415091883 | 7.30E-24  | postive |
| ATG4D     | AC090515.2 | 0.534323016 | 4.04E-41  | postive |
| MAP1LC3A  | AC090515.2 | 0.433082953 | 4.74E-26  | postive |
| GABARAPL1 | AC090515.2 | 0.539996856 | 4.01E-42  | postive |
| LPIN1     | AC090515.2 | 0.533320099 | 6.05E-41  | postive |
| HRAS      | EXOC3-AS1  | 0.428159484 | 1.94E-25  | postive |
| HELLS     | AL357078.2 | 0.513685811 | 1.26E-37  | postive |
| KLHL24    | AL357078.2 | 0.414484438 | 8.61E-24  | postive |
| TUBE1     | AL357078.2 | 0.446113588 | 1.02E-27  | postive |
| ALOX12    | AL357078.2 | 0.454844699 | 7.04E-29  | postive |
| GABPB1    | AL357078.2 | 0.557314432 | 2.62E-45  | postive |
| MAPK8     | AL357078.2 | 0.418732035 | 2.70E-24  | postive |
| LINC00472 | AL357078.2 | 0.805575717 | 3.64E-124 | postive |
| ATM       | AL357078.2 | 0.653412023 | 6.25E-67  | postive |
| FBXW7     | AL357078.2 | 0.466158052 | 1.97E-30  | postive |
| TUBE1     | HMGN3-AS1  | 0.508468977 | 8.84E-37  | postive |
| ATM       | HMGN3-AS1  | 0.483256087 | 6.85E-33  | postive |
| ISCU      | MAP4K3-DT  | 0.532146061 | 9.69E-41  | postive |
| TMBIM4    | MAP4K3-DT  | 0.40993442  | 2.93E-23  | postive |
| ZNF419    | AL049780.1 | 0.483356193 | 6.62E-33  | postive |
| TUBE1     | AL049780.1 | 0.448432396 | 5.04E-28  | postive |
| ALOX12    | AL049780.1 | 0.553083918 | 1.64E-44  | postive |
| TAZ       | AL049780.1 | 0.545584123 | 3.94E-43  | postive |

|           |            |              |           |          |
|-----------|------------|--------------|-----------|----------|
| FBXW7     | AL049780.1 | 0.424226084  | 5.88E-25  | postive  |
| ALOX12    | AC114488.1 | 0.451743596  | 1.83E-28  | postive  |
| TFAP2C    | AC114488.1 | 0.461513942  | 8.70E-30  | postive  |
| HBA1      | AC114488.1 | 0.423417652  | 7.37E-25  | postive  |
| PHKG2     | AC104794.3 | 0.406642193  | 7.02E-23  | postive  |
| TAZ       | AC104794.3 | 0.447642554  | 6.40E-28  | postive  |
| MTOR      | LINC01521  | 0.420940953  | 1.47E-24  | postive  |
| MAFG      | LINC01521  | 0.417969842  | 3.33E-24  | postive  |
| BECN1     | LINC01521  | 0.429573268  | 1.30E-25  | postive  |
| HELLS     | AP000866.6 | 0.509229678  | 6.67E-37  | postive  |
| ZNF419    | AP000866.6 | 0.420964082  | 1.46E-24  | postive  |
| KLHL24    | AP000866.6 | 0.444600273  | 1.60E-27  | postive  |
| TUBE1     | AP000866.6 | 0.497006694  | 5.69E-35  | postive  |
| ALOX12    | AP000866.6 | 0.404720858  | 1.16E-22  | postive  |
| GABPB1    | AP000866.6 | 0.600000996  | 5.20E-54  | postive  |
| MAPK8     | AP000866.6 | 0.409227605  | 3.54E-23  | postive  |
| LINC00472 | AP000866.6 | 0.848697836  | 1.12E-150 | postive  |
| ATM       | AP000866.6 | 0.655498769  | 1.73E-67  | postive  |
| FBXW7     | AP000866.6 | 0.484695561  | 4.19E-33  | postive  |
| SLC2A12   | AC010273.3 | 0.40671208   | 6.89E-23  | postive  |
| ACO1      | AC010273.3 | 0.409421636  | 3.36E-23  | postive  |
| DDIT3     | ITPR1-DT   | 0.404168146  | 1.35E-22  | postive  |
| ATG4D     | ITPR1-DT   | 0.434343256  | 3.29E-26  | postive  |
| GABARAPL1 | ITPR1-DT   | 0.422223547  | 1.03E-24  | postive  |
| WIP1      | ITPR1-DT   | 0.411159144  | 2.11E-23  | postive  |
| LPIN1     | ITPR1-DT   | 0.480200711  | 1.93E-32  | postive  |
| TSC22D3   | HS1BP3-IT1 | 0.431538748  | 7.39E-26  | postive  |
| ZNF419    | AC119674.1 | 0.433056065  | 4.77E-26  | postive  |
| TUBE1     | AC119674.1 | 0.543612999  | 8.98E-43  | postive  |
| ALOX12    | AC119674.1 | 0.448096673  | 5.58E-28  | postive  |
| GABPB1    | AC119674.1 | 0.536026207  | 2.03E-41  | postive  |
| ZEB1      | AC119674.1 | 0.414086928  | 9.59E-24  | postive  |
| ATM       | AC119674.1 | 0.513267724  | 1.48E-37  | postive  |
| FBXW7     | AC119674.1 | 0.546090266  | 3.19E-43  | postive  |
| BRD4      | AC087289.2 | 0.439324877  | 7.68E-27  | postive  |
| ZNF419    | AC087289.2 | 0.515559909  | 6.21E-38  | postive  |
| VEGFA     | AC087289.2 | 0.441448478  | 4.10E-27  | postive  |
| TUBE1     | AC087289.2 | 0.507497072  | 1.27E-36  | postive  |
| SETD1B    | AC087289.2 | 0.445491745  | 1.23E-27  | postive  |
| DRD4      | AC087289.2 | 0.444055028  | 1.89E-27  | postive  |
| ALOX12    | AC087289.2 | 0.525044011  | 1.61E-39  | postive  |
| NCOA4     | AC087289.2 | -0.454700965 | 7.36E-29  | negative |
| PHKG2     | AC087289.2 | 0.673080711  | 2.24E-72  | postive  |
| ULK1      | AC087289.2 | 0.428076831  | 1.98E-25  | postive  |
| TAZ       | AC087289.2 | 0.783441635  | 5.09E-113 | postive  |
| HELLS     | AP001178.2 | 0.551099929  | 3.83E-44  | postive  |
| TUBE1     | AP001178.2 | 0.467741091  | 1.18E-30  | postive  |
| ALOX12    | AP001178.2 | 0.498741565  | 3.06E-35  | postive  |
| GABPB1    | AP001178.2 | 0.520698931  | 8.71E-39  | postive  |
| ATG7      | AP001178.2 | 0.415879102  | 5.90E-24  | postive  |
| MAPK8     | AP001178.2 | 0.420561054  | 1.63E-24  | postive  |
| LINC00472 | AP001178.2 | 0.54342853   | 9.69E-43  | postive  |
| ATM       | AP001178.2 | 0.764181071  | 2.44E-104 | postive  |
| FBXW7     | AP001178.2 | 0.461906085  | 7.68E-30  | postive  |
| HELLS     | LINC01515  | 0.572529007  | 2.90E-48  | postive  |
| TUBE1     | LINC01515  | 0.471598059  | 3.37E-31  | postive  |
| ALOX12    | LINC01515  | 0.465297376  | 2.60E-30  | postive  |
| IREB2     | LINC01515  | 0.427448128  | 2.37E-25  | postive  |

|           |            |             |           |         |
|-----------|------------|-------------|-----------|---------|
| SP1       | LINC01515  | 0.401642241 | 2.60E-22  | postive |
| GABPB1    | LINC01515  | 0.500354994 | 1.71E-35  | postive |
| ATG7      | LINC01515  | 0.414654445 | 8.22E-24  | postive |
| MAPK8     | LINC01515  | 0.489638155 | 7.62E-34  | postive |
| LINC00472 | LINC01515  | 0.406770464 | 6.79E-23  | postive |
| PRKAA2    | LINC01515  | 0.483762804 | 5.77E-33  | postive |
| ATM       | LINC01515  | 0.794095745 | 3.26E-118 | postive |
| FBXW7     | LINC01515  | 0.469484238 | 6.72E-31  | postive |
| BACH1     | LINC01515  | 0.408479829 | 4.32E-23  | postive |
| TUBE1     | AC007406.1 | 0.409834403 | 3.01E-23  | postive |
| ALOX12    | AC007406.1 | 0.506305369 | 1.96E-36  | postive |
| GDF15     | AL135924.2 | 0.439864632 | 6.55E-27  | postive |
| MIOX      | AL135924.2 | 0.411546665 | 1.90E-23  | postive |
| TUBE1     | KCNIP2-AS1 | 0.433016217 | 4.83E-26  | postive |
| ALOX12    | KCNIP2-AS1 | 0.579954518 | 9.18E-50  | postive |
| HELLS     | AC008764.8 | 0.458991452 | 1.93E-29  | postive |
| BRD4      | AC008764.8 | 0.426755753 | 2.88E-25  | postive |
| ZNF419    | AC008764.8 | 0.558380602 | 1.65E-45  | postive |
| TUBE1     | AC008764.8 | 0.574792709 | 1.02E-48  | postive |
| SETD1B    | AC008764.8 | 0.439246503 | 7.86E-27  | postive |
| DRD4      | AC008764.8 | 0.435108068 | 2.64E-26  | postive |
| ALOX12    | AC008764.8 | 0.697650337 | 8.38E-80  | postive |
| PHKG2     | AC008764.8 | 0.561460422 | 4.25E-46  | postive |
| ATM       | AC008764.8 | 0.450171251 | 2.97E-28  | postive |
| TAZ       | AC008764.8 | 0.658454742 | 2.74E-68  | postive |
| FBXW7     | AC008764.8 | 0.404356249 | 1.28E-22  | postive |
| SLC1A4    | HID1-AS1   | 0.459407473 | 1.69E-29  | postive |
| HIC1      | HID1-AS1   | 0.419568217 | 2.14E-24  | postive |
| MAPK3     | HID1-AS1   | 0.470336299 | 5.09E-31  | postive |
| ZEB1      | HID1-AS1   | 0.714252505 | 2.90E-85  | postive |
| EPAS1     | HID1-AS1   | 0.724607201 | 7.15E-89  | postive |
| ZNF419    | AC093157.1 | 0.422149134 | 1.05E-24  | postive |
| TUBE1     | AC093157.1 | 0.554414228 | 9.22E-45  | postive |
| PHKG2     | AC093157.1 | 0.420637724 | 1.60E-24  | postive |
| TAZ       | AC093157.1 | 0.508377768 | 9.15E-37  | postive |
| KLHL24    | AC010333.2 | 0.611000142 | 1.80E-56  | postive |
| IREB2     | AC010333.2 | 0.426529242 | 3.08E-25  | postive |
| GABPB1    | AC010333.2 | 0.402332312 | 2.17E-22  | postive |
| PIK3CA    | AC010333.2 | 0.468932745 | 8.04E-31  | postive |
| KRAS      | AC010333.2 | 0.412965998 | 1.30E-23  | postive |
| LINC00472 | AC010333.2 | 0.88487127  | 2.70E-180 | postive |
| LPIN1     | AC010333.2 | 0.478342073 | 3.61E-32  | postive |
| ATM       | AC010333.2 | 0.462988937 | 5.44E-30  | postive |
| BRD4      | AL139287.1 | 0.442865429 | 2.69E-27  | postive |
| ZNF419    | AL139287.1 | 0.592212398 | 2.52E-52  | postive |
| VEGFA     | AL139287.1 | 0.627538371 | 2.34E-60  | postive |
| TUBE1     | AL139287.1 | 0.594813847 | 6.98E-53  | postive |
| SETD1B    | AL139287.1 | 0.588843224 | 1.31E-51  | postive |
| ALOX12    | AL139287.1 | 0.722877214 | 2.94E-88  | postive |
| ATM       | AL139287.1 | 0.412420316 | 1.50E-23  | postive |
| YY1AP1    | AL139287.1 | 0.48045067  | 1.77E-32  | postive |
| TAZ       | AL139287.1 | 0.597300355 | 2.02E-53  | postive |
| HELLS     | GHRLOS     | 0.531615907 | 1.20E-40  | postive |
| ZNF419    | GHRLOS     | 0.465162291 | 2.72E-30  | postive |
| TUBE1     | GHRLOS     | 0.54367995  | 8.73E-43  | postive |
| ALOX12    | GHRLOS     | 0.537990121 | 9.12E-42  | postive |
| GABPB1    | GHRLOS     | 0.525707979 | 1.24E-39  | postive |
| LINC00472 | GHRLOS     | 0.435632914 | 2.26E-26  | postive |

|           |             |             |           |         |
|-----------|-------------|-------------|-----------|---------|
| ATM       | GHRLOS      | 0.614172856 | 3.37E-57  | postive |
| TAZ       | GHRLOS      | 0.400361438 | 3.62E-22  | postive |
| FBXW7     | GHRLOS      | 0.539609548 | 4.70E-42  | postive |
| FANCD2    | MAP3K14-AS1 | 0.444313545 | 1.74E-27  | postive |
| HELLS     | MAP3K14-AS1 | 0.439525762 | 7.24E-27  | postive |
| TUBE1     | MAP3K14-AS1 | 0.562745405 | 2.40E-46  | postive |
| SETD1B    | MAP3K14-AS1 | 0.402143032 | 2.28E-22  | postive |
| ALOX12    | MAP3K14-AS1 | 0.64766524  | 2.05E-65  | postive |
| ATM       | MAP3K14-AS1 | 0.44555128  | 1.20E-27  | postive |
| TAZ       | MAP3K14-AS1 | 0.436071085 | 1.99E-26  | postive |
| PLIN2     | AC009053.3  | 0.412283514 | 1.56E-23  | postive |
| MAPK1     | AC009053.3  | 0.417196146 | 4.12E-24  | postive |
| FANCD2    | MYOSLID     | 0.444878476 | 1.47E-27  | postive |
| STMN1     | MYOSLID     | 0.7508605   | 8.29E-99  | postive |
| RRM2      | MYOSLID     | 0.55282902  | 1.82E-44  | postive |
| AURKA     | MYOSLID     | 0.568528565 | 1.80E-47  | postive |
| CDKN2A    | MYOSLID     | 0.802129069 | 2.45E-122 | postive |
| CD44      | LINC01588   | 0.419383662 | 2.26E-24  | postive |
| SOCS1     | LINC01588   | 0.44683282  | 8.18E-28  | postive |
| GABPB1    | AC005884.1  | 0.432465976 | 5.66E-26  | postive |
| ZEB1      | AC005884.1  | 0.407307559 | 5.89E-23  | postive |
| LINC00472 | AC005884.1  | 0.463486393 | 4.65E-30  | postive |
| BRD4      | AL022328.1  | 0.408921719 | 3.84E-23  | postive |
| ZNF419    | AL022328.1  | 0.566986939 | 3.61E-47  | postive |
| VEGFA     | AL022328.1  | 0.540812527 | 2.86E-42  | postive |
| TUBE1     | AL022328.1  | 0.537404747 | 1.16E-41  | postive |
| SETD1B    | AL022328.1  | 0.520260265 | 1.03E-38  | postive |
| DRD4      | AL022328.1  | 0.426655128 | 2.97E-25  | postive |
| ALOX12    | AL022328.1  | 0.71472327  | 2.00E-85  | postive |
| YY1AP1    | AL022328.1  | 0.431796052 | 6.86E-26  | postive |
| TAZ       | AL022328.1  | 0.558667094 | 1.45E-45  | postive |
| ZNF419    | AP000442.1  | 0.500791313 | 1.46E-35  | postive |
| TUBE1     | AP000442.1  | 0.5852566   | 7.39E-51  | postive |
| SETD1B    | AP000442.1  | 0.405422815 | 9.68E-23  | postive |
| ALOX12    | AP000442.1  | 0.588095512 | 1.88E-51  | postive |
| PHKG2     | AP000442.1  | 0.447540974 | 6.60E-28  | postive |
| TAZ       | AP000442.1  | 0.523796586 | 2.62E-39  | postive |
| BRD4      | ZNF528-AS1  | 0.412931423 | 1.31E-23  | postive |
| ZNF419    | ZNF528-AS1  | 0.642132542 | 5.49E-64  | postive |
| VEGFA     | ZNF528-AS1  | 0.401800335 | 2.50E-22  | postive |
| TUBE1     | ZNF528-AS1  | 0.41514574  | 7.20E-24  | postive |
| ALOX12    | ZNF528-AS1  | 0.476160162 | 7.47E-32  | postive |
| PHKG2     | ZNF528-AS1  | 0.491106889 | 4.56E-34  | postive |
| ULK1      | ZNF528-AS1  | 0.448790319 | 4.52E-28  | postive |
| TAZ       | ZNF528-AS1  | 0.560742106 | 5.83E-46  | postive |
| ZNF419    | Z97989.1    | 0.40595168  | 8.42E-23  | postive |
| VEGFA     | Z97989.1    | 0.416916917 | 4.44E-24  | postive |
| TUBE1     | Z97989.1    | 0.517695475 | 2.76E-38  | postive |
| GABPB1    | Z97989.1    | 0.451670249 | 1.88E-28  | postive |
| ZEB1      | Z97989.1    | 0.419561331 | 2.15E-24  | postive |
| BRD4      | LINC00342   | 0.466541511 | 1.74E-30  | postive |
| ZNF419    | LINC00342   | 0.577373889 | 3.08E-49  | postive |
| VEGFA     | LINC00342   | 0.538603622 | 7.10E-42  | postive |
| TUBE1     | LINC00342   | 0.588673535 | 1.42E-51  | postive |
| SETD1B    | LINC00342   | 0.470143285 | 5.42E-31  | postive |
| DRD4      | LINC00342   | 0.462336554 | 6.70E-30  | postive |
| ALOX12    | LINC00342   | 0.632750366 | 1.25E-61  | postive |
| PHKG2     | LINC00342   | 0.522183464 | 4.91E-39  | postive |

|           |            |             |           |         |
|-----------|------------|-------------|-----------|---------|
| TAZ       | LINC00342  | 0.75027587  | 1.42E-98  | postive |
| FBXW7     | LINC00342  | 0.423236179 | 7.75E-25  | postive |
| ZNF419    | ZNF32-AS1  | 0.479123074 | 2.77E-32  | postive |
| TUBE1     | ZNF32-AS1  | 0.504333671 | 4.05E-36  | postive |
| ALOX12    | ZNF32-AS1  | 0.421736812 | 1.18E-24  | postive |
| PHKG2     | ZNF32-AS1  | 0.539812108 | 4.32E-42  | postive |
| TAZ       | ZNF32-AS1  | 0.690673177 | 1.28E-77  | postive |
| FBXW7     | ZNF32-AS1  | 0.406734679 | 6.85E-23  | postive |
| HELLS     | AC015911.3 | 0.544915528 | 5.21E-43  | postive |
| TUBE1     | AC015911.3 | 0.452598995 | 1.41E-28  | postive |
| ALOX12    | AC015911.3 | 0.502453818 | 8.02E-36  | postive |
| GABPB1    | AC015911.3 | 0.511910303 | 2.46E-37  | postive |
| ATG7      | AC015911.3 | 0.421607179 | 1.22E-24  | postive |
| IFNG      | AC015911.3 | 0.441849545 | 3.64E-27  | postive |
| ATM       | AC015911.3 | 0.666720635 | 1.43E-70  | postive |
| FBXW7     | AC015911.3 | 0.523014986 | 3.55E-39  | postive |
| EGLN2     | AC107294.2 | 0.435877754 | 2.11E-26  | postive |
| FANCD2    | FAM66C     | 0.442107513 | 3.37E-27  | postive |
| HELLS     | FAM66C     | 0.470920731 | 4.21E-31  | postive |
| ALOX12    | FAM66C     | 0.429578688 | 1.29E-25  | postive |
| TFAP2C    | FAM66C     | 0.446864867 | 8.10E-28  | postive |
| DUOX1     | FAM66C     | 0.451856872 | 1.77E-28  | postive |
| HELLS     | ARMC2-AS1  | 0.452718642 | 1.36E-28  | postive |
| TUBE1     | ARMC2-AS1  | 0.491994339 | 3.35E-34  | postive |
| ALOX12    | ARMC2-AS1  | 0.516466581 | 4.40E-38  | postive |
| GABPB1    | ARMC2-AS1  | 0.443888023 | 1.98E-27  | postive |
| ATM       | ARMC2-AS1  | 0.686261931 | 2.86E-76  | postive |
| FBXW7     | ARMC2-AS1  | 0.463731434 | 4.30E-30  | postive |
| HELLS     | AC010536.2 | 0.550810554 | 4.33E-44  | postive |
| TUBE1     | AC010536.2 | 0.421598929 | 1.22E-24  | postive |
| ALOX12    | AC010536.2 | 0.478990668 | 2.90E-32  | postive |
| GABPB1    | AC010536.2 | 0.487966934 | 1.36E-33  | postive |
| LINC00472 | AC010536.2 | 0.566916809 | 3.72E-47  | postive |
| ATM       | AC010536.2 | 0.663304651 | 1.28E-69  | postive |
| FBXW7     | AC010536.2 | 0.468361521 | 9.68E-31  | postive |
| TUBE1     | AC026979.3 | 0.525352866 | 1.43E-39  | postive |
| ATM       | AC026979.3 | 0.44429548  | 1.75E-27  | postive |
| TFAP2C    | AC087301.1 | 0.577275238 | 3.22E-49  | postive |
| HBA1      | AC087301.1 | 0.537571891 | 1.08E-41  | postive |
| DUOX1     | AC087301.1 | 0.415757642 | 6.09E-24  | postive |
| HELLS     | Z83843.1   | 0.495678175 | 9.12E-35  | postive |
| ZNF419    | Z83843.1   | 0.410270985 | 2.68E-23  | postive |
| KLHL24    | Z83843.1   | 0.491339873 | 4.21E-34  | postive |
| TUBE1     | Z83843.1   | 0.476607396 | 6.44E-32  | postive |
| ALOX12    | Z83843.1   | 0.407655983 | 5.37E-23  | postive |
| IREB2     | Z83843.1   | 0.441259491 | 4.33E-27  | postive |
| GABPB1    | Z83843.1   | 0.618294648 | 3.72E-58  | postive |
| PIK3CA    | Z83843.1   | 0.459898046 | 1.45E-29  | postive |
| ATG7      | Z83843.1   | 0.412315427 | 1.55E-23  | postive |
| MAPK8     | Z83843.1   | 0.456014074 | 4.90E-29  | postive |
| LINC00472 | Z83843.1   | 0.865668978 | 1.71E-163 | postive |
| ATM       | Z83843.1   | 0.700943717 | 7.42E-81  | postive |
| FBXW7     | Z83843.1   | 0.482495456 | 8.88E-33  | postive |
| HELLS     | AC007622.2 | 0.513006808 | 1.63E-37  | postive |
| ZNF419    | AC007622.2 | 0.450716397 | 2.51E-28  | postive |
| KLHL24    | AC007622.2 | 0.469702241 | 6.26E-31  | postive |
| TUBE1     | AC007622.2 | 0.447550675 | 6.58E-28  | postive |
| ALOX12    | AC007622.2 | 0.488598716 | 1.09E-33  | postive |

|           |            |              |           |          |
|-----------|------------|--------------|-----------|----------|
| IREB2     | AC007622.2 | 0.425597429  | 4.00E-25  | postive  |
| GABPB1    | AC007622.2 | 0.522964908  | 3.62E-39  | postive  |
| MAPK8     | AC007622.2 | 0.406260547  | 7.76E-23  | postive  |
| LINC00472 | AC007622.2 | 0.780974656  | 7.38E-112 | postive  |
| LPIN1     | AC007622.2 | 0.470181264  | 5.36E-31  | postive  |
| ATM       | AC007622.2 | 0.575467017  | 7.48E-49  | postive  |
| FBXW7     | AC007622.2 | 0.460742005  | 1.11E-29  | postive  |
| PHKG2     | AC131159.2 | 0.4292516    | 1.42E-25  | postive  |
| BECN1     | AC131159.2 | -0.472629861 | 2.40E-31  | negative |
| ISCU      | AC055720.2 | 0.663739903  | 9.72E-70  | postive  |
| DDIT3     | AC055720.2 | 0.522479513  | 4.38E-39  | postive  |
| HERPUD1   | AC055720.2 | 0.448695588  | 4.65E-28  | postive  |
| SLC2A12   | AC055720.2 | 0.501346987  | 1.20E-35  | postive  |
| CS        | AC055720.2 | 0.404594898  | 1.20E-22  | postive  |
| GOT1      | AC055720.2 | 0.415258879  | 6.98E-24  | postive  |
| ATG4D     | AC055720.2 | 0.51532822   | 6.78E-38  | postive  |
| MAP1LC3A  | AC055720.2 | 0.454315911  | 8.30E-29  | postive  |
| GABARAPL1 | AC055720.2 | 0.669668743  | 2.11E-71  | postive  |
| WIPI2     | AC055720.2 | 0.549143308  | 8.79E-44  | postive  |
| BAP1      | AC055720.2 | 0.448638516  | 4.73E-28  | postive  |
| LPIN1     | AC055720.2 | 0.606792298  | 1.62E-55  | postive  |
| KLHL24    | AC037198.1 | 0.412722719  | 1.39E-23  | postive  |
| GABPB1    | AC037198.1 | 0.457019059  | 3.58E-29  | postive  |
| LINC00472 | AC037198.1 | 0.782580094  | 1.30E-112 | postive  |
| HELLS     | AP000786.1 | 0.440700174  | 5.12E-27  | postive  |
| KLHL24    | AP000786.1 | 0.455754414  | 5.31E-29  | postive  |
| TUBE1     | AP000786.1 | 0.478938796  | 2.95E-32  | postive  |
| ALOX12    | AP000786.1 | 0.426215224  | 3.36E-25  | postive  |
| IREB2     | AP000786.1 | 0.484942885  | 3.85E-33  | postive  |
| GABPB1    | AP000786.1 | 0.559832574  | 8.71E-46  | postive  |
| PIK3CA    | AP000786.1 | 0.466190168  | 1.95E-30  | postive  |
| MAPK8     | AP000786.1 | 0.499746454  | 2.13E-35  | postive  |
| LINC00472 | AP000786.1 | 0.783826915  | 3.35E-113 | postive  |
| ATM       | AP000786.1 | 0.714684673  | 2.07E-85  | postive  |
| FBXW7     | AP000786.1 | 0.462381569  | 6.61E-30  | postive  |
| HELLS     | DHRSX-IT1  | 0.457202024  | 3.38E-29  | postive  |
| ALOX12    | DHRSX-IT1  | 0.486127452  | 2.57E-33  | postive  |
| GABPB1    | DHRSX-IT1  | 0.415446323  | 6.63E-24  | postive  |
| LINC00472 | DHRSX-IT1  | 0.450402621  | 2.77E-28  | postive  |
| ATM       | DHRSX-IT1  | 0.577696529  | 2.65E-49  | postive  |
| BRD4      | AL359921.1 | 0.428161153  | 1.94E-25  | postive  |
| ZNF419    | AL359921.1 | 0.504241348  | 4.18E-36  | postive  |
| VEGFA     | AL359921.1 | 0.483601535  | 6.09E-33  | postive  |
| TUBE1     | AL359921.1 | 0.556308441  | 4.06E-45  | postive  |
| SETD1B    | AL359921.1 | 0.542595842  | 1.37E-42  | postive  |
| ALOX12    | AL359921.1 | 0.703668343  | 9.72E-82  | postive  |
| ATM       | AL359921.1 | 0.479913886  | 2.13E-32  | postive  |
| YY1AP1    | AL359921.1 | 0.415860304  | 5.93E-24  | postive  |
| TAZ       | AL359921.1 | 0.503316446  | 5.86E-36  | postive  |
| NOX1      | AP001330.4 | 0.601133918  | 2.93E-54  | postive  |
| BECN1     | AP001330.4 | -0.401741957 | 2.53E-22  | negative |
| RB1       | USP46-DT   | 0.40738691   | 5.77E-23  | postive  |
| GCLC      | USP46-DT   | 0.409005127  | 3.75E-23  | postive  |
| MTOR      | USP46-DT   | 0.456947413  | 3.66E-29  | postive  |
| RPL8      | USP46-DT   | -0.40347578  | 1.61E-22  | negative |
| MAPK14    | USP46-DT   | 0.471938356  | 3.01E-31  | postive  |
| IREB2     | USP46-DT   | 0.53314528   | 6.49E-41  | postive  |
| PIK3CA    | USP46-DT   | 0.405321124  | 9.94E-23  | postive  |



|           |            |             |           |         |
|-----------|------------|-------------|-----------|---------|
| KRAS      | USP46-DT   | 0.433265896 | 4.49E-26  | postive |
| NCOA4     | USP46-DT   | 0.41611185  | 5.53E-24  | postive |
| SNX4      | USP46-DT   | 0.436792384 | 1.61E-26  | postive |
| MAPK8     | USP46-DT   | 0.482161925 | 9.94E-33  | postive |
| PRKAA2    | USP46-DT   | 0.419889364 | 1.96E-24  | postive |
| HELLS     | AL139288.1 | 0.413687335 | 1.07E-23  | postive |
| ALOX12    | AL139288.1 | 0.41315018  | 1.24E-23  | postive |
| TFAP2C    | AL139288.1 | 0.427807499 | 2.14E-25  | postive |
| DUOX1     | AL139288.1 | 0.481809333 | 1.12E-32  | postive |
| HSPB1     | AC009309.1 | 0.405764    | 8.85E-23  | postive |
| HBA1      | AC009309.1 | 0.64473229  | 1.18E-64  | postive |
| HRAS      | AC009309.1 | 0.630292165 | 5.00E-61  | postive |
| MAP1LC3A  | AC009309.1 | 0.4840548   | 5.22E-33  | postive |
| EGLN2     | AC009309.1 | 0.780060735 | 1.97E-111 | postive |
| FH        | AL161668.4 | 0.545911734 | 3.44E-43  | postive |
| ISCU      | AL161668.4 | 0.531798917 | 1.11E-40  | postive |
| ALB       | AL161668.4 | 0.646089939 | 5.26E-65  | postive |
| GPX2      | AL161668.4 | 0.485025216 | 3.75E-33  | postive |
| TFR2      | AL161668.4 | 0.493909178 | 1.71E-34  | postive |
| GOT1      | AL161668.4 | 0.499848396 | 2.06E-35  | postive |
| ATG4D     | AL161668.4 | 0.427014786 | 2.68E-25  | postive |
| GABARAPL2 | AL161668.4 | 0.495234647 | 1.07E-34  | postive |
| GABARAPL1 | AL161668.4 | 0.476847126 | 5.94E-32  | postive |
| CDO1      | AL161668.4 | 0.608401154 | 7.01E-56  | postive |
| ZNF419    | AL606760.2 | 0.476924395 | 5.79E-32  | postive |
| TUBE1     | AL606760.2 | 0.550743727 | 4.45E-44  | postive |
| ALOX12    | AL606760.2 | 0.641646143 | 7.31E-64  | postive |
| TAZ       | AL606760.2 | 0.488240552 | 1.24E-33  | postive |
| HELLS     | AL031667.3 | 0.473196185 | 1.99E-31  | postive |
| KLHL24    | AL031667.3 | 0.506074227 | 2.14E-36  | postive |
| GABPB1    | AL031667.3 | 0.57192794  | 3.82E-48  | postive |
| PIK3CA    | AL031667.3 | 0.432896884 | 5.00E-26  | postive |
| LINC00472 | AL031667.3 | 0.812994785 | 3.15E-128 | postive |
| ATM       | AL031667.3 | 0.625054566 | 9.29E-60  | postive |
| FBXW7     | AL031667.3 | 0.488110336 | 1.29E-33  | postive |
| HELLS     | AC016405.1 | 0.502292274 | 8.50E-36  | postive |
| GABPB1    | AC016405.1 | 0.459414055 | 1.69E-29  | postive |
| LINC00472 | AC016405.1 | 0.527187948 | 6.95E-40  | postive |
| ATM       | AC016405.1 | 0.644408484 | 1.43E-64  | postive |
| FBXW7     | AC016405.1 | 0.420344395 | 1.73E-24  | postive |
| TAZ       | PAXIP1-DT  | 0.47532746  | 9.85E-32  | postive |
| HELLS     | AC087277.2 | 0.575678467 | 6.78E-49  | postive |
| TUBE1     | AC087277.2 | 0.436874853 | 1.58E-26  | postive |
| ALOX12    | AC087277.2 | 0.432370904 | 5.82E-26  | postive |
| GABPB1    | AC087277.2 | 0.538820694 | 6.49E-42  | postive |
| ATG7      | AC087277.2 | 0.451708555 | 1.85E-28  | postive |
| LINC00472 | AC087277.2 | 0.575243877 | 8.29E-49  | postive |
| ATM       | AC087277.2 | 0.720030664 | 2.95E-87  | postive |
| FBXW7     | AC087277.2 | 0.513584332 | 1.31E-37  | postive |
| TRIB3     | AC156455.1 | 0.426046441 | 3.52E-25  | postive |
| TAZ       | AC156455.1 | 0.408548092 | 4.24E-23  | postive |
| ZNF419    | LINC00106  | 0.476989885 | 5.67E-32  | postive |
| TUBE1     | LINC00106  | 0.443094936 | 2.51E-27  | postive |
| SETD1B    | LINC00106  | 0.507006006 | 1.52E-36  | postive |
| ALOX12    | LINC00106  | 0.586050695 | 5.04E-51  | postive |
| PHKG2     | LINC00106  | 0.452969149 | 1.26E-28  | postive |
| TAZ       | LINC00106  | 0.543851832 | 8.13E-43  | postive |
| GCLC      | DNAJC3-DT  | 0.407255278 | 5.97E-23  | postive |

|           |            |              |           |          |
|-----------|------------|--------------|-----------|----------|
| ACSL3     | DNAJC3-DT  | 0.467361473  | 1.34E-30  | postive  |
| KLHL24    | DNAJC3-DT  | 0.538940442  | 6.18E-42  | postive  |
| IREB2     | DNAJC3-DT  | 0.457631822  | 2.96E-29  | postive  |
| GABPB1    | DNAJC3-DT  | 0.44049415   | 5.44E-27  | postive  |
| PIK3CA    | DNAJC3-DT  | 0.400682491  | 3.33E-22  | postive  |
| GABARAPL1 | DNAJC3-DT  | 0.408375618  | 4.44E-23  | postive  |
| MAPK8     | DNAJC3-DT  | 0.401460633  | 2.73E-22  | postive  |
| LINC00472 | DNAJC3-DT  | 0.521172354  | 7.26E-39  | postive  |
| LPIN1     | DNAJC3-DT  | 0.477140743  | 5.39E-32  | postive  |
| HSPA5     | RAD51-AS1  | -0.431747362 | 6.96E-26  | negative |
| ZNF419    | RAD51-AS1  | 0.648968027  | 9.34E-66  | postive  |
| VEGFA     | RAD51-AS1  | 0.498326633  | 3.55E-35  | postive  |
| TUBE1     | RAD51-AS1  | 0.680930962  | 1.14E-74  | postive  |
| SETD1B    | RAD51-AS1  | 0.492577533  | 2.73E-34  | postive  |
| ALOX12    | RAD51-AS1  | 0.695865596  | 3.08E-79  | postive  |
| GABPB1    | RAD51-AS1  | 0.444773291  | 1.52E-27  | postive  |
| PHKG2     | RAD51-AS1  | 0.429820721  | 1.21E-25  | postive  |
| ATM       | RAD51-AS1  | 0.429105055  | 1.48E-25  | postive  |
| TAZ       | RAD51-AS1  | 0.602708917  | 1.32E-54  | postive  |
| FBXW7     | RAD51-AS1  | 0.409921307  | 2.94E-23  | postive  |
| NCF2      | MIR223HG   | 0.41377375   | 1.04E-23  | postive  |
| BRD4      | AL049840.5 | 0.488493259  | 1.13E-33  | postive  |
| ZNF419    | AL049840.5 | 0.595225312  | 5.69E-53  | postive  |
| VEGFA     | AL049840.5 | 0.439576853  | 7.13E-27  | postive  |
| TUBE1     | AL049840.5 | 0.455359326  | 6.00E-29  | postive  |
| SETD1B    | AL049840.5 | 0.4189017    | 2.58E-24  | postive  |
| ALOX12    | AL049840.5 | 0.459168886  | 1.82E-29  | postive  |
| GABPB1    | AL049840.5 | 0.520548402  | 9.23E-39  | postive  |
| EGLN2     | AL049840.5 | 0.517085746  | 3.48E-38  | postive  |
| TAZ       | AL049840.5 | 0.523377702  | 3.09E-39  | postive  |
| FBXW7     | AL049840.5 | 0.512630655  | 1.87E-37  | postive  |
| TFAP2C    | IDH2-DT    | 0.661392267  | 4.32E-69  | postive  |
| HBA1      | IDH2-DT    | 0.534247829  | 4.16E-41  | postive  |
| NCF2      | AC011899.2 | 0.508304816  | 9.40E-37  | postive  |
| FTL       | AC011899.2 | 0.427907725  | 2.08E-25  | postive  |
| HAMP      | AC011899.2 | 0.432893667  | 5.00E-26  | postive  |
| ALOX5     | AC011899.2 | 0.414244874  | 9.19E-24  | postive  |
| IFNG      | AC011899.2 | 0.416224566  | 5.37E-24  | postive  |
| HELLS     | AC090517.2 | 0.474489378  | 1.30E-31  | postive  |
| TUBE1     | AC090517.2 | 0.547178493  | 2.02E-43  | postive  |
| ALOX12    | AC090517.2 | 0.422300414  | 1.01E-24  | postive  |
| GABPB1    | AC090517.2 | 0.556208655  | 4.24E-45  | postive  |
| LINC00472 | AC090517.2 | 0.494114958  | 1.59E-34  | postive  |
| ATM       | AC090517.2 | 0.543752124  | 8.47E-43  | postive  |
| HELLS     | MAP3K5-AS1 | 0.465092465  | 2.78E-30  | postive  |
| KLHL24    | MAP3K5-AS1 | 0.409230835  | 3.53E-23  | postive  |
| GABPB1    | MAP3K5-AS1 | 0.520192141  | 1.06E-38  | postive  |
| LINC00472 | MAP3K5-AS1 | 0.818356866  | 2.80E-131 | postive  |
| ATM       | MAP3K5-AS1 | 0.562953605  | 2.19E-46  | postive  |
| FBXW7     | MAP3K5-AS1 | 0.445389028  | 1.26E-27  | postive  |
| HELLS     | AP001271.1 | 0.400605973  | 3.40E-22  | postive  |
| ALOX12    | AP001271.1 | 0.500963532  | 1.38E-35  | postive  |
| ATM       | AP001271.1 | 0.57221232   | 3.35E-48  | postive  |
| TXNRD1    | AP003119.3 | 0.420766422  | 1.54E-24  | postive  |
| KLHL24    | ARHGAP31-1 | 0.468567029  | 9.06E-31  | postive  |
| ALOX12    | ARHGAP31-1 | 0.413810726  | 1.03E-23  | postive  |
| IREB2     | ARHGAP31-1 | 0.453011417  | 1.24E-28  | postive  |
| GABPB1    | ARHGAP31-1 | 0.41760026   | 3.68E-24  | postive  |

|           |            |             |           |         |
|-----------|------------|-------------|-----------|---------|
| PIK3CA    | ARHGAP31-/ | 0.444768251 | 1.52E-27  | postive |
| MAPK8     | ARHGAP31-/ | 0.457703163 | 2.89E-29  | postive |
| LINC00472 | ARHGAP31-/ | 0.606988463 | 1.46E-55  | postive |
| ATM       | ARHGAP31-/ | 0.583133945 | 2.04E-50  | postive |
| FANCD2    | AC012073.1 | 0.500469872 | 1.64E-35  | postive |
| HELLS     | AC012073.1 | 0.568702344 | 1.66E-47  | postive |
| PML       | AC012073.1 | 0.417082901 | 4.24E-24  | postive |
| BRD4      | AC012073.1 | 0.435507545 | 2.35E-26  | postive |
| SETD1B    | AC012073.1 | 0.405994548 | 8.33E-23  | postive |
| ALOX12    | AC012073.1 | 0.44371454  | 2.09E-27  | postive |
| TAZ       | AC012073.1 | 0.486421724 | 2.32E-33  | postive |
| GPX4      | YTHDF3-AS1 | 0.52420704  | 2.23E-39  | postive |
| HSPB1     | YTHDF3-AS1 | 0.437025804 | 1.51E-26  | postive |
| HSF1      | YTHDF3-AS1 | 0.457662458 | 2.93E-29  | postive |
| OTUB1     | YTHDF3-AS1 | 0.541774826 | 1.92E-42  | postive |
| CHMP6     | YTHDF3-AS1 | 0.42774652  | 2.18E-25  | postive |
| RPL8      | YTHDF3-AS1 | 0.497600473 | 4.60E-35  | postive |
| SLC2A8    | YTHDF3-AS1 | 0.424440008 | 5.54E-25  | postive |
| HRAS      | YTHDF3-AS1 | 0.565106003 | 8.39E-47  | postive |
| PHKG2     | YTHDF3-AS1 | 0.416515681 | 4.96E-24  | postive |
| KLHL24    | AC016831.4 | 0.568854495 | 1.55E-47  | postive |
| GABPB1    | AC016831.4 | 0.420670286 | 1.58E-24  | postive |
| PIK3CA    | AC016831.4 | 0.466903251 | 1.55E-30  | postive |
| KRAS      | AC016831.4 | 0.410277451 | 2.67E-23  | postive |
| LINC00472 | AC016831.4 | 0.951266836 | 1.55E-276 | postive |
| ZNF419    | ZNF436-AS1 | 0.400621707 | 3.39E-22  | postive |
| ALOX12    | ZNF436-AS1 | 0.450823476 | 2.43E-28  | postive |
| PHKG2     | ZNF436-AS1 | 0.542833491 | 1.24E-42  | postive |
| TAZ       | ZNF436-AS1 | 0.621326215 | 7.19E-59  | postive |
| HELLS     | AC024060.2 | 0.430561119 | 9.78E-26  | postive |
| ZNF419    | AC024060.2 | 0.596793553 | 2.61E-53  | postive |
| TUBE1     | AC024060.2 | 0.567523398 | 2.83E-47  | postive |
| ALOX12    | AC024060.2 | 0.432267394 | 5.99E-26  | postive |
| GABPB1    | AC024060.2 | 0.534214115 | 4.22E-41  | postive |
| PHKG2     | AC024060.2 | 0.555864807 | 4.92E-45  | postive |
| LINC00472 | AC024060.2 | 0.427477937 | 2.35E-25  | postive |
| TAZ       | AC024060.2 | 0.639925838 | 2.00E-63  | postive |
| FBXW7     | AC024060.2 | 0.517964598 | 2.49E-38  | postive |
| BRD4      | AC006435.2 | 0.473228743 | 1.97E-31  | postive |
| ZNF419    | AC006435.2 | 0.591337875 | 3.87E-52  | postive |
| TUBE1     | AC006435.2 | 0.54885483  | 9.94E-44  | postive |
| SETD1B    | AC006435.2 | 0.520198709 | 1.06E-38  | postive |
| DRD4      | AC006435.2 | 0.404678037 | 1.18E-22  | postive |
| ALOX12    | AC006435.2 | 0.600808931 | 3.46E-54  | postive |
| PHKG2     | AC006435.2 | 0.527750277 | 5.56E-40  | postive |
| TAZ       | AC006435.2 | 0.649180218 | 8.22E-66  | postive |
| FBXW7     | AC006435.2 | 0.417893529 | 3.40E-24  | postive |
| PHKG2     | AC018904.1 | 0.473051565 | 2.09E-31  | postive |
| BID       | AC018904.1 | 0.404947377 | 1.10E-22  | postive |
| TAZ       | AC018904.1 | 0.404592197 | 1.20E-22  | postive |
| HELLS     | AL513008.1 | 0.51825607  | 2.23E-38  | postive |
| TUBE1     | AL513008.1 | 0.406147296 | 8.00E-23  | postive |
| ALOX12    | AL513008.1 | 0.429901964 | 1.18E-25  | postive |
| GABPB1    | AL513008.1 | 0.477674858 | 4.51E-32  | postive |
| ATG7      | AL513008.1 | 0.446226428 | 9.82E-28  | postive |
| LINC00472 | AL513008.1 | 0.455833871 | 5.18E-29  | postive |
| ATM       | AL513008.1 | 0.686740585 | 2.05E-76  | postive |
| FBXW7     | AL513008.1 | 0.417279467 | 4.02E-24  | postive |

|           |            |              |          |          |
|-----------|------------|--------------|----------|----------|
| TFAP2C    | AP003555.1 | 0.580840976  | 6.04E-50 | postive  |
| HBA1      | AP003555.1 | 0.534609126  | 3.60E-41 | postive  |
| DUOX1     | AP003555.1 | 0.400345392  | 3.64E-22 | postive  |
| ZNF419    | AC007686.3 | 0.560304946  | 7.07E-46 | postive  |
| TUBE1     | AC007686.3 | 0.470167067  | 5.38E-31 | postive  |
| ALOX12    | AC007686.3 | 0.603712568  | 7.88E-55 | postive  |
| TAZ       | AC007686.3 | 0.432828018  | 5.10E-26 | postive  |
| HSPB1     | AL731577.2 | -0.451302793 | 2.10E-28 | negative |
| STAT3     | AL731577.2 | 0.471401147  | 3.60E-31 | postive  |
| MTOR      | AL731577.2 | 0.542110775  | 1.67E-42 | postive  |
| OXSRI     | AL731577.2 | 0.477906017  | 4.17E-32 | postive  |
| MAPK14    | AL731577.2 | 0.482269973  | 9.58E-33 | postive  |
| EIF2AK4   | AL731577.2 | 0.421411837  | 1.29E-24 | postive  |
| IREB2     | AL731577.2 | 0.570755961  | 6.53E-48 | postive  |
| NOX1      | AL731577.2 | -0.472431831 | 2.56E-31 | negative |
| PIK3CA    | AL731577.2 | 0.526923714  | 7.71E-40 | postive  |
| NRAS      | AL731577.2 | 0.417327417  | 3.97E-24 | postive  |
| NCOA4     | AL731577.2 | 0.548364358  | 1.22E-43 | postive  |
| PHKG2     | AL731577.2 | -0.483910364 | 5.48E-33 | negative |
| BECN1     | AL731577.2 | 0.521277043  | 6.97E-39 | postive  |
| MAPK1     | AL731577.2 | 0.466145692  | 1.98E-30 | postive  |
| ZEB1      | AL731577.2 | 0.419887343  | 1.96E-24 | postive  |
| MAPK8     | AL731577.2 | 0.460663039  | 1.14E-29 | postive  |
| PRKAA2    | AL731577.2 | 0.44562889   | 1.18E-27 | postive  |
| PRKAA1    | AL731577.2 | 0.404623094  | 1.19E-22 | postive  |
| EPAS1     | AL731577.2 | 0.417108188  | 4.22E-24 | postive  |
| TLR4      | AL731577.2 | 0.468788684  | 8.43E-31 | postive  |
| TAZ       | AL731577.2 | -0.417373998 | 3.92E-24 | negative |
| SIRT1     | AL731577.2 | 0.520139653  | 1.08E-38 | postive  |
| HELLS     | UBE2Q1-AS1 | 0.430101084  | 1.12E-25 | postive  |
| BRD4      | UBE2Q1-AS1 | 0.412938017  | 1.31E-23 | postive  |
| ZNF419    | UBE2Q1-AS1 | 0.531709538  | 1.15E-40 | postive  |
| VEGFA     | UBE2Q1-AS1 | 0.443353045  | 2.33E-27 | postive  |
| TUBE1     | UBE2Q1-AS1 | 0.622998883  | 2.88E-59 | postive  |
| SETD1B    | UBE2Q1-AS1 | 0.515388303  | 6.63E-38 | postive  |
| ALOX12    | UBE2Q1-AS1 | 0.705244791  | 2.97E-82 | postive  |
| GABPB1    | UBE2Q1-AS1 | 0.437781606  | 1.21E-26 | postive  |
| ATM       | UBE2Q1-AS1 | 0.566364742  | 4.77E-47 | postive  |
| YY1AP1    | UBE2Q1-AS1 | 0.458804576  | 2.05E-29 | postive  |
| TAZ       | UBE2Q1-AS1 | 0.487922158  | 1.38E-33 | postive  |
| FBXW7     | UBE2Q1-AS1 | 0.476336411  | 7.05E-32 | postive  |
| TUBE1     | LIFR-AS1   | 0.443900076  | 1.97E-27 | postive  |
| MAPK8     | LIFR-AS1   | 0.438153692  | 1.08E-26 | postive  |
| PRKAA2    | LIFR-AS1   | 0.432432977  | 5.71E-26 | postive  |
| ATM       | LIFR-AS1   | 0.402240546  | 2.23E-22 | postive  |
| ISCU      | AL356740.1 | 0.481034209  | 1.46E-32 | postive  |
| ACSL3     | AL356740.1 | 0.435424113  | 2.40E-26 | postive  |
| KLHL24    | AL356740.1 | 0.424958622  | 4.79E-25 | postive  |
| SLC2A12   | AL356740.1 | 0.416840292  | 4.54E-24 | postive  |
| ATG4D     | AL356740.1 | 0.495212397  | 1.08E-34 | postive  |
| GABARAPL1 | AL356740.1 | 0.631855811  | 2.07E-61 | postive  |
| WIP1      | AL356740.1 | 0.425392904  | 4.24E-25 | postive  |
| LPIN1     | AL356740.1 | 0.657591515  | 4.71E-68 | postive  |
| HELLS     | FLJ31104   | 0.410529778  | 2.50E-23 | postive  |
| TUBE1     | FLJ31104   | 0.502502401  | 7.88E-36 | postive  |
| ALOX12    | FLJ31104   | 0.52629438   | 9.87E-40 | postive  |
| TAZ       | FLJ31104   | 0.450140312  | 3.00E-28 | postive  |
| HELLS     | AC091185.1 | 0.4414693    | 4.07E-27 | postive  |

|           |            |             |           |         |
|-----------|------------|-------------|-----------|---------|
| ZNF419    | AC091185.1 | 0.516850237 | 3.80E-38  | postive |
| VEGFA     | AC091185.1 | 0.464414689 | 3.45E-30  | postive |
| TUBE1     | AC091185.1 | 0.651888063 | 1.59E-66  | postive |
| SETD1B    | AC091185.1 | 0.466823495 | 1.59E-30  | postive |
| ALOX12    | AC091185.1 | 0.695705401 | 3.46E-79  | postive |
| GABPB1    | AC091185.1 | 0.50635963  | 1.93E-36  | postive |
| ATM       | AC091185.1 | 0.667758706 | 7.31E-71  | postive |
| YY1AP1    | AC091185.1 | 0.400961162 | 3.10E-22  | postive |
| FBXW7     | AC091185.1 | 0.46455804  | 3.30E-30  | postive |
| ZNF419    | AC005393.1 | 0.447638157 | 6.41E-28  | postive |
| PHKG2     | AC005393.1 | 0.587156945 | 2.96E-51  | postive |
| TAZ       | AC005393.1 | 0.657557943 | 4.81E-68  | postive |
| TF        | LINC01151  | 0.599472083 | 6.80E-54  | postive |
| ALOX12    | HDHD5-AS1  | 0.409037674 | 3.72E-23  | postive |
| HBA1      | HDHD5-AS1  | 0.432420075 | 5.74E-26  | postive |
| ALOX12B   | HDHD5-AS1  | 0.461772777 | 8.02E-30  | postive |
| FANCD2    | RHOA-IT1   | 0.423382789 | 7.44E-25  | postive |
| HELLS     | RHOA-IT1   | 0.479686028 | 2.30E-32  | postive |
| ALOX12    | RHOA-IT1   | 0.532856889 | 7.29E-41  | postive |
| TFAP2C    | RHOA-IT1   | 0.452080765 | 1.65E-28  | postive |
| HBA1      | RHOA-IT1   | 0.407617168 | 5.43E-23  | postive |
| GABPB1    | RHOA-IT1   | 0.402962265 | 1.84E-22  | postive |
| DUOX1     | RHOA-IT1   | 0.442905846 | 2.66E-27  | postive |
| ATM       | RHOA-IT1   | 0.417563533 | 3.72E-24  | postive |
| FBXW7     | RHOA-IT1   | 0.405535462 | 9.40E-23  | postive |
| KLHL24    | CARMN      | 0.486322386 | 2.40E-33  | postive |
| GABPB1    | CARMN      | 0.493072328 | 2.29E-34  | postive |
| PIK3CA    | CARMN      | 0.424157965 | 5.99E-25  | postive |
| LINC00472 | CARMN      | 0.870056181 | 4.30E-167 | postive |
| ATM       | CARMN      | 0.522401838 | 4.51E-39  | postive |
| HELLS     | AL512656.1 | 0.538589634 | 7.14E-42  | postive |
| TUBE1     | AL512656.1 | 0.498192381 | 3.72E-35  | postive |
| ALOX12    | AL512656.1 | 0.522409356 | 4.50E-39  | postive |
| GABPB1    | AL512656.1 | 0.542208937 | 1.61E-42  | postive |
| MAPK8     | AL512656.1 | 0.425673993 | 3.91E-25  | postive |
| LINC00472 | AL512656.1 | 0.676075314 | 3.04E-73  | postive |
| ATM       | AL512656.1 | 0.703944092 | 7.91E-82  | postive |
| FBXW7     | AL512656.1 | 0.494540919 | 1.37E-34  | postive |
| ZNF419    | AC021321.1 | 0.483660548 | 5.97E-33  | postive |
| KLHL24    | AC021321.1 | 0.516335673 | 4.63E-38  | postive |
| GABPB1    | AC021321.1 | 0.490537777 | 5.57E-34  | postive |
| LINC00472 | AC021321.1 | 0.782639901 | 1.22E-112 | postive |
| LPIN1     | AC021321.1 | 0.508258998 | 9.56E-37  | postive |
| HELLS     | AL020997.2 | 0.496621797 | 6.52E-35  | postive |
| TUBE1     | AL020997.2 | 0.415741457 | 6.12E-24  | postive |
| GABPB1    | AL020997.2 | 0.535465708 | 2.55E-41  | postive |
| LINC00472 | AL020997.2 | 0.705883595 | 1.83E-82  | postive |
| ATM       | AL020997.2 | 0.649260102 | 7.83E-66  | postive |
| FBXW7     | AL020997.2 | 0.474349372 | 1.36E-31  | postive |
| ALOX12    | SEC24B-AS1 | 0.402078812 | 2.32E-22  | postive |
| GABPB1    | SEC24B-AS1 | 0.427082944 | 2.63E-25  | postive |
| VEGFA     | AL353803.1 | 0.466635531 | 1.69E-30  | postive |
| ALOX12    | AL353803.1 | 0.413933292 | 1.00E-23  | postive |
| TUBE1     | THAP9-AS1  | 0.437423392 | 1.34E-26  | postive |
| TAZ       | THAP9-AS1  | 0.411322744 | 2.02E-23  | postive |
| ALOX12    | AL355312.2 | 0.456053039 | 4.84E-29  | postive |
| TFAP2C    | AL355312.2 | 0.402197586 | 2.25E-22  | postive |
| HELLS     | AC007216.2 | 0.433476552 | 4.23E-26  | postive |

|           |            |             |           |         |
|-----------|------------|-------------|-----------|---------|
| ALOX12    | AC007216.2 | 0.401197744 | 2.92E-22  | postive |
| TFAP2C    | AC007216.2 | 0.471617064 | 3.35E-31  | postive |
| HBA1      | AC007216.2 | 0.42768276  | 2.22E-25  | postive |
| DUOX1     | AC007216.2 | 0.422979106 | 8.33E-25  | postive |
| LINC00472 | AC007216.2 | 0.519647118 | 1.31E-38  | postive |
| ALOX12    | AP006621.3 | 0.491093902 | 4.59E-34  | postive |
| PHKG2     | AP006621.3 | 0.578993526 | 1.44E-49  | postive |
| TAZ       | AP006621.3 | 0.673967266 | 1.24E-72  | postive |
| SLC40A1   | LINC01094  | 0.402660046 | 2.00E-22  | postive |
| NCF2      | LINC01094  | 0.610862852 | 1.94E-56  | postive |
| HAMP      | LINC01094  | 0.499031455 | 2.76E-35  | postive |
| CYBB      | LINC01094  | 0.782684982 | 1.16E-112 | postive |
| ATG7      | LINC01094  | 0.477412112 | 4.92E-32  | postive |
| TGFBR1    | LINC01094  | 0.401713533 | 2.55E-22  | postive |
| TLR4      | LINC01094  | 0.47516362  | 1.04E-31  | postive |
| MTDH      | LINC01094  | 0.420627979 | 1.60E-24  | postive |
| IDH1      | LINC01094  | 0.465627366 | 2.34E-30  | postive |
| BACH1     | LINC01094  | 0.505565147 | 2.58E-36  | postive |
| ZNF419    | AC127024.6 | 0.493506677 | 1.97E-34  | postive |
| TUBE1     | AC127024.6 | 0.507503905 | 1.26E-36  | postive |
| ALOX12    | AC127024.6 | 0.47856539  | 3.35E-32  | postive |
| GABPB1    | AC127024.6 | 0.450573549 | 2.62E-28  | postive |
| PHKG2     | AC127024.6 | 0.454988076 | 6.74E-29  | postive |
| TAZ       | AC127024.6 | 0.569606817 | 1.10E-47  | postive |
| FBXW7     | AC127024.6 | 0.406592323 | 7.11E-23  | postive |
| PML       | IL10RB-DT  | 0.484386812 | 4.66E-33  | postive |
| ALOX5     | IL10RB-DT  | 0.447952303 | 5.83E-28  | postive |
| ZNF419    | AC105020.6 | 0.493851889 | 1.74E-34  | postive |
| VEGFA     | AC105020.6 | 0.441355551 | 4.21E-27  | postive |
| TUBE1     | AC105020.6 | 0.524610763 | 1.91E-39  | postive |
| SETD1B    | AC105020.6 | 0.416143633 | 5.49E-24  | postive |
| ALOX12    | AC105020.6 | 0.659082084 | 1.85E-68  | postive |
| TAZ       | AC105020.6 | 0.559646793 | 9.45E-46  | postive |
| NCF2      | LINC01857  | 0.532270928 | 9.22E-41  | postive |
| FTL       | LINC01857  | 0.614678778 | 2.58E-57  | postive |
| CAPG      | LINC01857  | 0.453015808 | 1.24E-28  | postive |
| ALOX15B   | LINC01857  | 0.461520813 | 8.68E-30  | postive |
| ALOX12    | SGMS1-AS1  | 0.431960749 | 6.55E-26  | postive |
| IREB2     | SGMS1-AS1  | 0.433490122 | 4.21E-26  | postive |
| SP1       | SGMS1-AS1  | 0.4464411   | 9.21E-28  | postive |
| MAPK1     | SGMS1-AS1  | 0.427781959 | 2.16E-25  | postive |
| MAPK8     | SGMS1-AS1  | 0.535638388 | 2.37E-41  | postive |
| PRKAA2    | SGMS1-AS1  | 0.5374252   | 1.15E-41  | postive |
| ATM       | SGMS1-AS1  | 0.519793464 | 1.23E-38  | postive |
| SIRT1     | SGMS1-AS1  | 0.470074567 | 5.55E-31  | postive |
| JDP2      | LINC01560  | 0.459030832 | 1.91E-29  | postive |
| ZNF419    | LINC01560  | 0.449023659 | 4.21E-28  | postive |
| EIF2S1    | LINC01560  | 0.489521601 | 7.93E-34  | postive |
| GABPB1    | LINC01560  | 0.51812159  | 2.34E-38  | postive |
| HELLS     | AC137932.1 | 0.445580176 | 1.19E-27  | postive |
| ZNF419    | AC137932.1 | 0.425971948 | 3.60E-25  | postive |
| TUBE1     | AC137932.1 | 0.517138257 | 3.41E-38  | postive |
| SETD1B    | AC137932.1 | 0.430780468 | 9.18E-26  | postive |
| ALOX12    | AC137932.1 | 0.622684653 | 3.42E-59  | postive |
| GABPB1    | AC137932.1 | 0.414225855 | 9.24E-24  | postive |
| ATM       | AC137932.1 | 0.640955897 | 1.10E-63  | postive |
| FBXW7     | AC137932.1 | 0.43677495  | 1.62E-26  | postive |
| ALOX12    | PPP1R12A-A | 0.431019888 | 8.57E-26  | postive |

|           |            |              |           |          |
|-----------|------------|--------------|-----------|----------|
| TFAP2C    | PPP1R12A-A | 0.415475412  | 6.58E-24  | postive  |
| HSPB1     | AC083880.1 | 0.499904926  | 2.01E-35  | postive  |
| HRAS      | AC083880.1 | 0.408234086  | 4.61E-23  | postive  |
| PHKG2     | AC083880.1 | 0.487771475  | 1.46E-33  | postive  |
| TAZ       | AC083880.1 | 0.415342635  | 6.82E-24  | postive  |
| LONP1     | AC083880.1 | 0.417482301  | 3.81E-24  | postive  |
| HELLS     | AL132780.1 | 0.44822067   | 5.37E-28  | postive  |
| ZNF419    | AL132780.1 | 0.533835447  | 4.92E-41  | postive  |
| TUBE1     | AL132780.1 | 0.494088254  | 1.60E-34  | postive  |
| ALOX12    | AL132780.1 | 0.566145893  | 5.26E-47  | postive  |
| GABPB1    | AL132780.1 | 0.430767229  | 9.22E-26  | postive  |
| LINC00472 | AL132780.1 | 0.407655585  | 5.37E-23  | postive  |
| LPIN1     | AL132780.1 | 0.438688583  | 9.26E-27  | postive  |
| ATM       | AL132780.1 | 0.475457439  | 9.44E-32  | postive  |
| FBXW7     | AL132780.1 | 0.42502016   | 4.70E-25  | postive  |
| HELLS     | PPP3CB-AS1 | 0.512327819  | 2.10E-37  | postive  |
| ZNF419    | PPP3CB-AS1 | 0.470584148  | 4.70E-31  | postive  |
| TUBE1     | PPP3CB-AS1 | 0.596688239  | 2.75E-53  | postive  |
| ALOX12    | PPP3CB-AS1 | 0.620804608  | 9.55E-59  | postive  |
| GABPB1    | PPP3CB-AS1 | 0.554441163  | 9.12E-45  | postive  |
| MAPK8     | PPP3CB-AS1 | 0.494595514  | 1.34E-34  | postive  |
| ATM       | PPP3CB-AS1 | 0.646552316  | 3.99E-65  | postive  |
| FBXW7     | PPP3CB-AS1 | 0.491206215  | 4.41E-34  | postive  |
| BRD4      | AL117209.1 | 0.451328192  | 2.08E-28  | postive  |
| ZNF419    | AL117209.1 | 0.573945088  | 1.51E-48  | postive  |
| VEGFA     | AL117209.1 | 0.412005262  | 1.68E-23  | postive  |
| TUBE1     | AL117209.1 | 0.495589894  | 9.41E-35  | postive  |
| SETD1B    | AL117209.1 | 0.469022639  | 7.81E-31  | postive  |
| DRD4      | AL117209.1 | 0.415434037  | 6.65E-24  | postive  |
| ALOX12    | AL117209.1 | 0.550756173  | 4.43E-44  | postive  |
| PHKG2     | AL117209.1 | 0.432499385  | 5.61E-26  | postive  |
| TAZ       | AL117209.1 | 0.587795904  | 2.17E-51  | postive  |
| FANCD2    | AC008105.2 | 0.558360508  | 1.66E-45  | postive  |
| HELLS     | AC008105.2 | 0.40961566   | 3.19E-23  | postive  |
| ALOX12    | AC008105.2 | 0.516531665  | 4.29E-38  | postive  |
| PHKG2     | AC008105.2 | 0.522380812  | 4.55E-39  | postive  |
| SAT1      | AC008105.2 | 0.430257491  | 1.07E-25  | postive  |
| IFNG      | AC008105.2 | 0.462480041  | 6.40E-30  | postive  |
| TAZ       | AC008105.2 | 0.570216889  | 8.35E-48  | postive  |
| ISCU      | AC005696.1 | 0.445418382  | 1.25E-27  | postive  |
| ATG4D     | AC005696.1 | 0.562794369  | 2.35E-46  | postive  |
| GABARAPL1 | AC005696.1 | 0.430257763  | 1.07E-25  | postive  |
| BAP1      | AC005696.1 | 0.427180113  | 2.56E-25  | postive  |
| TFAP2C    | ZNF687-AS1 | 0.579730173  | 1.02E-49  | postive  |
| HBA1      | ZNF687-AS1 | 0.522250763  | 4.78E-39  | postive  |
| IL6       | AC092376.2 | 0.506061366  | 2.15E-36  | postive  |
| SLC2A3    | AC092376.2 | 0.454383999  | 8.12E-29  | postive  |
| EIF2AK4   | BAALC-AS1  | 0.464709999  | 3.14E-30  | postive  |
| ALB       | AP001107.9 | 0.401315967  | 2.83E-22  | postive  |
| TFAP2C    | AP001107.9 | 0.512596772  | 1.90E-37  | postive  |
| CDO1      | AP001107.9 | 0.431596534  | 7.27E-26  | postive  |
| PHKG2     | AC009097.2 | 0.544675078  | 5.76E-43  | postive  |
| TAZ       | AC009097.2 | 0.556486142  | 3.76E-45  | postive  |
| KLHL24    | AC090236.2 | 0.540141097  | 3.78E-42  | postive  |
| LINC00472 | AC090236.2 | 0.799227923  | 7.95E-121 | postive  |
| LPIN1     | AC090236.2 | 0.438053463  | 1.12E-26  | postive  |
| HSF1      | AL158151.4 | 0.434305011  | 3.33E-26  | postive  |
| NCOA4     | AL158151.4 | -0.421945475 | 1.11E-24  | negative |

|           |            |             |           |         |
|-----------|------------|-------------|-----------|---------|
| PHKG2     | AL158151.4 | 0.598160062 | 1.31E-53  | postive |
| TAZ       | AL158151.4 | 0.58156964  | 4.28E-50  | postive |
| HELLS     | AL731563.3 | 0.563798131 | 1.50E-46  | postive |
| ZNF419    | AL731563.3 | 0.469183133 | 7.42E-31  | postive |
| TUBE1     | AL731563.3 | 0.523568423 | 2.87E-39  | postive |
| ALOX12    | AL731563.3 | 0.645960757 | 5.68E-65  | postive |
| GABPB1    | AL731563.3 | 0.497257706 | 5.20E-35  | postive |
| DUOX1     | AL731563.3 | 0.407773674 | 5.20E-23  | postive |
| LINC00472 | AL731563.3 | 0.435897095 | 2.10E-26  | postive |
| ATM       | AL731563.3 | 0.556328552 | 4.03E-45  | postive |
| FBXW7     | AL731563.3 | 0.486522931 | 2.24E-33  | postive |
| HELLS     | AC008781.2 | 0.540492204 | 3.27E-42  | postive |
| ALOX12    | AC008781.2 | 0.49440076  | 1.43E-34  | postive |
| GABPB1    | AC008781.2 | 0.415034364 | 7.42E-24  | postive |
| ATM       | AC008781.2 | 0.568628452 | 1.72E-47  | postive |
| FBXW7     | AC008781.2 | 0.425323967 | 4.32E-25  | postive |
| FANCD2    | LINC01357  | 0.498172894 | 3.75E-35  | postive |
| HBA1      | LINC01357  | 0.412008649 | 1.68E-23  | postive |
| IFNG      | LINC01357  | 0.414224672 | 9.24E-24  | postive |
| HELLS     | YEATS2-AS1 | 0.462863058 | 5.67E-30  | postive |
| BRD4      | YEATS2-AS1 | 0.446981143 | 7.82E-28  | postive |
| ZNF419    | YEATS2-AS1 | 0.552218536 | 2.37E-44  | postive |
| VEGFA     | YEATS2-AS1 | 0.462028813 | 7.39E-30  | postive |
| TUBE1     | YEATS2-AS1 | 0.529171423 | 3.17E-40  | postive |
| SETD1B    | YEATS2-AS1 | 0.455840414 | 5.17E-29  | postive |
| ALOX12    | YEATS2-AS1 | 0.659668857 | 1.28E-68  | postive |
| GABPB1    | YEATS2-AS1 | 0.402738315 | 1.95E-22  | postive |
| ATM       | YEATS2-AS1 | 0.481545395 | 1.23E-32  | postive |
| TAZ       | YEATS2-AS1 | 0.516822003 | 3.85E-38  | postive |
| FBXW7     | YEATS2-AS1 | 0.453097562 | 1.21E-28  | postive |
| TAZ       | AC004069.1 | 0.555122409 | 6.79E-45  | postive |
| ATF4      | AL118516.1 | 0.536520712 | 1.66E-41  | postive |
| PHKG2     | AL118516.1 | 0.402662133 | 1.99E-22  | postive |
| TAZ       | AL118516.1 | 0.570331517 | 7.92E-48  | postive |
| HELLS     | PABPC4-AS1 | 0.451486816 | 1.98E-28  | postive |
| KLHL24    | PABPC4-AS1 | 0.512416773 | 2.03E-37  | postive |
| TUBE1     | PABPC4-AS1 | 0.43636453  | 1.83E-26  | postive |
| IREB2     | PABPC4-AS1 | 0.465014896 | 2.85E-30  | postive |
| GABPB1    | PABPC4-AS1 | 0.559320076 | 1.09E-45  | postive |
| PIK3CA    | PABPC4-AS1 | 0.475243463 | 1.01E-31  | postive |
| KRAS      | PABPC4-AS1 | 0.410803818 | 2.32E-23  | postive |
| MAPK8     | PABPC4-AS1 | 0.44937432  | 3.78E-28  | postive |
| LINC00472 | PABPC4-AS1 | 0.906837711 | 1.21E-203 | postive |
| ATM       | PABPC4-AS1 | 0.663858072 | 9.01E-70  | postive |
| FBXW7     | PABPC4-AS1 | 0.444708677 | 1.55E-27  | postive |
| HELLS     | DNM3OS     | 0.433588063 | 4.09E-26  | postive |
| ZNF419    | DNM3OS     | 0.486750582 | 2.07E-33  | postive |
| ZFP69B    | DNM3OS     | 0.445589969 | 1.19E-27  | postive |
| GABPB1    | DNM3OS     | 0.591692229 | 3.25E-52  | postive |
| ZEB1      | DNM3OS     | 0.509883141 | 5.23E-37  | postive |
| FBXW7     | DNM3OS     | 0.419139603 | 2.41E-24  | postive |
| HELLS     | PSMD6-AS2  | 0.540650508 | 3.06E-42  | postive |
| ZNF419    | PSMD6-AS2  | 0.439716805 | 6.84E-27  | postive |
| KLHL24    | PSMD6-AS2  | 0.455464153 | 5.81E-29  | postive |
| TUBE1     | PSMD6-AS2  | 0.518824309 | 1.79E-38  | postive |
| ALOX12    | PSMD6-AS2  | 0.506892312 | 1.58E-36  | postive |
| IREB2     | PSMD6-AS2  | 0.461786409 | 7.98E-30  | postive |
| GABPB1    | PSMD6-AS2  | 0.61718866  | 6.74E-58  | postive |



|           |            |             |           |         |
|-----------|------------|-------------|-----------|---------|
| PIK3CA    | PSMD6-AS2  | 0.44688661  | 8.05E-28  | postive |
| ATG7      | PSMD6-AS2  | 0.450655555 | 2.56E-28  | postive |
| MAPK8     | PSMD6-AS2  | 0.474001391 | 1.53E-31  | postive |
| LINC00472 | PSMD6-AS2  | 0.792350306 | 2.43E-117 | postive |
| ATM       | PSMD6-AS2  | 0.77387828  | 1.33E-108 | postive |
| FBXW7     | PSMD6-AS2  | 0.540915566 | 2.74E-42  | postive |
| HELLS     | AC114760.2 | 0.584863442 | 8.92E-51  | postive |
| TUBE1     | AC114760.2 | 0.429787633 | 1.22E-25  | postive |
| ALOX12    | AC114760.2 | 0.455050431 | 6.61E-29  | postive |
| GABPB1    | AC114760.2 | 0.559693017 | 9.26E-46  | postive |
| ATG7      | AC114760.2 | 0.471185144 | 3.86E-31  | postive |
| LINC00472 | AC114760.2 | 0.67300698  | 2.35E-72  | postive |
| ATM       | AC114760.2 | 0.701458407 | 5.06E-81  | postive |
| FBXW7     | AC114760.2 | 0.488783438 | 1.03E-33  | postive |
| HELLS     | MIRLET7BHG | 0.540368628 | 3.44E-42  | postive |
| ZNF419    | MIRLET7BHG | 0.459522432 | 1.63E-29  | postive |
| ALOX12    | MIRLET7BHG | 0.470019254 | 5.65E-31  | postive |
| GABPB1    | MIRLET7BHG | 0.512288531 | 2.13E-37  | postive |
| LINC00472 | MIRLET7BHG | 0.517755363 | 2.69E-38  | postive |
| ATM       | MIRLET7BHG | 0.543683479 | 8.72E-43  | postive |
| FBXW7     | MIRLET7BHG | 0.536394354 | 1.75E-41  | postive |
| TFAP2C    | RN7SL832P  | 0.566069771 | 5.45E-47  | postive |
| HBA1      | RN7SL832P  | 0.533674622 | 5.25E-41  | postive |
| PTGS2     | AC008011.2 | 0.458849491 | 2.02E-29  | postive |
| IL6       | AC008011.2 | 0.491033476 | 4.68E-34  | postive |
| SLC2A3    | AC008011.2 | 0.415087313 | 7.31E-24  | postive |
| VEGFA     | AC009163.7 | 0.424198258 | 5.92E-25  | postive |
| TUBE1     | AC009163.7 | 0.439773281 | 6.73E-27  | postive |
| ALOX12    | AC009163.7 | 0.619451681 | 1.99E-58  | postive |
| SP1       | AC009163.7 | 0.404379271 | 1.27E-22  | postive |
| TUBE1     | AC084876.1 | 0.54044266  | 3.34E-42  | postive |
| ALOX12    | AC084876.1 | 0.476119539 | 7.57E-32  | postive |
| PHKG2     | AC084876.1 | 0.510014502 | 4.98E-37  | postive |
| TAZ       | AC084876.1 | 0.629575722 | 7.49E-61  | postive |
| FBXW7     | AC084876.1 | 0.402974757 | 1.84E-22  | postive |
| ALOX12    | AL136368.1 | 0.443605462 | 2.16E-27  | postive |
| RB1       | CARD8-AS1  | 0.421293358 | 1.33E-24  | postive |
| SLC1A4    | CARD8-AS1  | 0.471134882 | 3.92E-31  | postive |
| IL33      | CARD8-AS1  | 0.453165223 | 1.18E-28  | postive |
| HMGB1     | CARD8-AS1  | 0.518794178 | 1.81E-38  | postive |
| GABPB1    | CARD8-AS1  | 0.436375205 | 1.82E-26  | postive |
| ZEB1      | CARD8-AS1  | 0.59138295  | 3.79E-52  | postive |
| EPAS1     | CARD8-AS1  | 0.416482711 | 5.00E-24  | postive |
| TLR4      | CARD8-AS1  | 0.52391054  | 2.51E-39  | postive |
| TFAP2C    | U91319.1   | 0.409000708 | 3.76E-23  | postive |
| HRAS      | LINC01137  | 0.500647982 | 1.54E-35  | postive |
| FANCD2    | AC104653.1 | 0.415301479 | 6.90E-24  | postive |
| TFAP2C    | AC104653.1 | 0.468716607 | 8.63E-31  | postive |
| ZNF419    | LENG8-AS1  | 0.529110732 | 3.25E-40  | postive |
| VEGFA     | LENG8-AS1  | 0.535761725 | 2.26E-41  | postive |
| TUBE1     | LENG8-AS1  | 0.555268412 | 6.38E-45  | postive |
| SETD1B    | LENG8-AS1  | 0.415758929 | 6.09E-24  | postive |
| DRD4      | LENG8-AS1  | 0.444255401 | 1.78E-27  | postive |
| ALOX12    | LENG8-AS1  | 0.700798931 | 8.26E-81  | postive |
| PHKG2     | LENG8-AS1  | 0.495222088 | 1.07E-34  | postive |
| YY1AP1    | LENG8-AS1  | 0.419095681 | 2.44E-24  | postive |
| TAZ       | LENG8-AS1  | 0.679800144 | 2.46E-74  | postive |
| GPX4      | AC090425.2 | 0.418936311 | 2.55E-24  | postive |

|           |            |              |           |          |
|-----------|------------|--------------|-----------|----------|
| HSPB1     | AC090425.2 | 0.452545216  | 1.43E-28  | postive  |
| HBA1      | AC090425.2 | 0.51786713   | 2.58E-38  | postive  |
| HRAS      | AC090425.2 | 0.68025023   | 1.81E-74  | postive  |
| BECN1     | AC090425.2 | -0.440402157 | 5.59E-27  | negative |
| MAP1LC3A  | AC090425.2 | 0.430733222  | 9.31E-26  | postive  |
| EGLN2     | AC090425.2 | 0.774883773  | 4.68E-109 | postive  |
| MUC1      | KRT7-AS    | 0.501703726  | 1.05E-35  | postive  |
| CD44      | KRT7-AS    | 0.430005766  | 1.15E-25  | postive  |
| SOCS1     | KRT7-AS    | 0.467174935  | 1.42E-30  | postive  |
| STMN1     | LINC00973  | 0.736321938  | 3.70E-93  | postive  |
| RRM2      | LINC00973  | 0.529168407  | 3.18E-40  | postive  |
| AURKA     | LINC00973  | 0.547908052  | 1.48E-43  | postive  |
| CDKN2A    | LINC00973  | 0.805354675  | 4.78E-124 | postive  |
| HSPB1     | AC009065.4 | 0.514912732  | 7.93E-38  | postive  |
| SLC2A6    | AC009065.4 | 0.424054068  | 6.17E-25  | postive  |
| NRAS      | AC009065.4 | -0.40550904  | 9.46E-23  | negative |
| HRAS      | AC009065.4 | 0.60272622   | 1.30E-54  | postive  |
| NCOA4     | AC009065.4 | -0.470574492 | 4.71E-31  | negative |
| PHKG2     | AC009065.4 | 0.710671435  | 4.71E-84  | postive  |
| BECN1     | AC009065.4 | -0.40565991  | 9.10E-23  | negative |
| MAPK1     | AC009065.4 | -0.462668432 | 6.03E-30  | negative |
| EGLN2     | AC009065.4 | 0.671210007  | 7.68E-72  | postive  |
| TAZ       | AC009065.4 | 0.698066976  | 6.18E-80  | postive  |
| HELLS     | COL18A1-AS | 0.534388308  | 3.93E-41  | postive  |
| TUBE1     | COL18A1-AS | 0.405782451  | 8.81E-23  | postive  |
| GABPB1    | COL18A1-AS | 0.537758126  | 1.00E-41  | postive  |
| ATG7      | COL18A1-AS | 0.460433185  | 1.22E-29  | postive  |
| LINC00472 | COL18A1-AS | 0.680880575  | 1.18E-74  | postive  |
| ATM       | COL18A1-AS | 0.725906279  | 2.46E-89  | postive  |
| FBXW7     | COL18A1-AS | 0.463407041  | 4.77E-30  | postive  |
| ATG4D     | ZNF582-AS1 | 0.410308444  | 2.65E-23  | postive  |
| GABARAPL2 | ZNF582-AS1 | 0.461531679  | 8.65E-30  | postive  |
| BAP1      | ZNF582-AS1 | 0.441652788  | 3.86E-27  | postive  |
| HELLS     | AC012181.1 | 0.441230048  | 4.37E-27  | postive  |
| ZNF419    | AC012181.1 | 0.442782211  | 2.76E-27  | postive  |
| KLHL24    | AC012181.1 | 0.439932272  | 6.42E-27  | postive  |
| TUBE1     | AC012181.1 | 0.579978695  | 9.08E-50  | postive  |
| ALOX12    | AC012181.1 | 0.498330672  | 3.54E-35  | postive  |
| IREB2     | AC012181.1 | 0.423451975  | 7.30E-25  | postive  |
| GABPB1    | AC012181.1 | 0.545321807  | 4.40E-43  | postive  |
| PIK3CA    | AC012181.1 | 0.414638738  | 8.26E-24  | postive  |
| MAPK8     | AC012181.1 | 0.452112335  | 1.64E-28  | postive  |
| LINC00472 | AC012181.1 | 0.637434345  | 8.50E-63  | postive  |
| ATM       | AC012181.1 | 0.691939836  | 5.20E-78  | postive  |
| FBXW7     | AC012181.1 | 0.515095243  | 7.41E-38  | postive  |
| MUC1      | ADCY6-DT   | 0.487266907  | 1.73E-33  | postive  |
| NFS1      | AL118506.1 | 0.419588399  | 2.13E-24  | postive  |
| SETD1B    | AL118506.1 | 0.436457675  | 1.78E-26  | postive  |
| TXNRD1    | LINC01234  | 0.421566392  | 1.23E-24  | postive  |
| RRM2      | LINC01234  | 0.457893351  | 2.72E-29  | postive  |
| AURKA     | LINC01234  | 0.438628795  | 9.42E-27  | postive  |
| ALOX12    | AL031432.3 | 0.405940033  | 8.45E-23  | postive  |
| TFAP2C    | AL031432.3 | 0.483732506  | 5.83E-33  | postive  |
| HBA1      | AL031432.3 | 0.432082499  | 6.32E-26  | postive  |
| DUOX1     | AL031432.3 | 0.438592889  | 9.52E-27  | postive  |
| HELLS     | AC002553.2 | 0.561199137  | 4.77E-46  | postive  |
| ZNF419    | AC002553.2 | 0.469119384  | 7.57E-31  | postive  |
| TUBE1     | AC002553.2 | 0.592144463  | 2.61E-52  | postive  |

|           |            |             |           |         |
|-----------|------------|-------------|-----------|---------|
| ALOX12    | AC002553.2 | 0.548122844 | 1.35E-43  | postive |
| GABPB1    | AC002553.2 | 0.590047944 | 7.28E-52  | postive |
| LINC00472 | AC002553.2 | 0.708850279 | 1.91E-83  | postive |
| ATM       | AC002553.2 | 0.708767143 | 2.04E-83  | postive |
| FBXW7     | AC002553.2 | 0.519640741 | 1.31E-38  | postive |
| KLHL24    | AL512625.1 | 0.413374646 | 1.16E-23  | postive |
| LINC00472 | AL512625.1 | 0.453936469 | 9.33E-29  | postive |
| LPIN1     | AL512625.1 | 0.450561922 | 2.63E-28  | postive |
| LAMP2     | LINC02167  | 0.535403467 | 2.61E-41  | postive |
| TFAP2C    | AL359397.1 | 0.472321385 | 2.66E-31  | postive |
| TUBE1     | U91328.3   | 0.499100163 | 2.69E-35  | postive |
| ALOX12    | U91328.3   | 0.431762982 | 6.93E-26  | postive |
| PHKG2     | U91328.3   | 0.516241939 | 4.79E-38  | postive |
| TAZ       | U91328.3   | 0.620738077 | 9.90E-59  | postive |
| ZNF419    | AC092171.4 | 0.47248481  | 2.52E-31  | postive |
| TUBE1     | AC092171.4 | 0.440599105 | 5.27E-27  | postive |
| ALOX12    | AC092171.4 | 0.459006031 | 1.92E-29  | postive |
| PHKG2     | AC092171.4 | 0.609197764 | 4.63E-56  | postive |
| TAZ       | AC092171.4 | 0.701082419 | 6.69E-81  | postive |
| BRD4      | AC022167.2 | 0.477274874 | 5.15E-32  | postive |
| ZNF419    | AC022167.2 | 0.483999284 | 5.32E-33  | postive |
| VEGFA     | AC022167.2 | 0.446249546 | 9.75E-28  | postive |
| TUBE1     | AC022167.2 | 0.52274115  | 3.95E-39  | postive |
| SETD1B    | AC022167.2 | 0.498970627 | 2.82E-35  | postive |
| DRD4      | AC022167.2 | 0.413746509 | 1.05E-23  | postive |
| ALOX12    | AC022167.2 | 0.633825339 | 6.75E-62  | postive |
| PHKG2     | AC022167.2 | 0.54181359  | 1.89E-42  | postive |
| TAZ       | AC022167.2 | 0.664208575 | 7.20E-70  | postive |
| ZNF419    | AC093110.1 | 0.505359383 | 2.78E-36  | postive |
| VEGFA     | AC093110.1 | 0.473443295 | 1.84E-31  | postive |
| TUBE1     | AC093110.1 | 0.553767744 | 1.22E-44  | postive |
| SETD1B    | AC093110.1 | 0.494933828 | 1.19E-34  | postive |
| ALOX12    | AC093110.1 | 0.572334935 | 3.17E-48  | postive |
| GABPB1    | AC093110.1 | 0.492524311 | 2.78E-34  | postive |
| ZEB1      | AC093110.1 | 0.424322422 | 5.72E-25  | postive |
| MAPK8     | AC093110.1 | 0.471211515 | 3.83E-31  | postive |
| LINC00472 | AC093110.1 | 0.574187349 | 1.35E-48  | postive |
| ATM       | AC093110.1 | 0.477393059 | 4.95E-32  | postive |
| FBXW7     | AC093110.1 | 0.428064584 | 1.99E-25  | postive |
| MTOR      | AC108693.2 | 0.464328975 | 3.55E-30  | postive |
| ACSL3     | AC108693.2 | 0.464518247 | 3.34E-30  | postive |
| KLHL24    | AC108693.2 | 0.741433111 | 4.22E-95  | postive |
| MAP3K5    | AC108693.2 | 0.42751115  | 2.33E-25  | postive |
| EIF2AK4   | AC108693.2 | 0.403602257 | 1.56E-22  | postive |
| IREB2     | AC108693.2 | 0.542642141 | 1.34E-42  | postive |
| PIK3CA    | AC108693.2 | 0.607634241 | 1.04E-55  | postive |
| KRAS      | AC108693.2 | 0.475677967 | 8.77E-32  | postive |
| SLC38A1   | AC108693.2 | 0.447302339 | 7.10E-28  | postive |
| ATG7      | AC108693.2 | 0.431220302 | 8.10E-26  | postive |
| GABARAPL1 | AC108693.2 | 0.458730357 | 2.09E-29  | postive |
| LINC00472 | AC108693.2 | 0.787008091 | 1.00E-114 | postive |
| PRKAA1    | AC108693.2 | 0.462908902 | 5.59E-30  | postive |
| TGFBR1    | AC108693.2 | 0.460487282 | 1.20E-29  | postive |
| LPIN1     | AC108693.2 | 0.550462232 | 5.02E-44  | postive |
| ATM       | AC108693.2 | 0.417839945 | 3.45E-24  | postive |
| TUBE1     | LINC02019  | 0.553455053 | 1.39E-44  | postive |
| ALOX12    | LINC02019  | 0.449798394 | 3.33E-28  | postive |
| PHKG2     | LINC02019  | 0.548913711 | 9.69E-44  | postive |

|           |            |              |           |          |
|-----------|------------|--------------|-----------|----------|
| TAZ       | LINC02019  | 0.613835258  | 4.04E-57  | postive  |
| SLC3A2    | LINC02432  | 0.409496155  | 3.29E-23  | postive  |
| ISCU      | LINC02432  | 0.521413676  | 6.61E-39  | postive  |
| DDIT3     | LINC02432  | 0.445995845  | 1.05E-27  | postive  |
| KLHL24    | LINC02432  | 0.457976563  | 2.65E-29  | postive  |
| GABARAPL1 | LINC02432  | 0.596004103  | 3.86E-53  | postive  |
| WIPI2     | LINC02432  | 0.408317715  | 4.51E-23  | postive  |
| LPIN1     | LINC02432  | 0.57431086   | 1.28E-48  | postive  |
| ZNF419    | AC104532.2 | 0.554957318  | 7.29E-45  | postive  |
| TUBE1     | AC104532.2 | 0.570442473  | 7.53E-48  | postive  |
| SETD1B    | AC104532.2 | 0.51892148   | 1.72E-38  | postive  |
| ALOX12    | AC104532.2 | 0.658881255  | 2.10E-68  | postive  |
| GABPB1    | AC104532.2 | 0.435535473  | 2.33E-26  | postive  |
| ATM       | AC104532.2 | 0.529760356  | 2.51E-40  | postive  |
| FBXW7     | AC104532.2 | 0.433694459  | 3.97E-26  | postive  |
| PHKG2     | AC096677.1 | 0.424244527  | 5.85E-25  | postive  |
| TUBE1     | AC022306.2 | 0.512158297  | 2.24E-37  | postive  |
| NOX1      | AC022306.2 | 0.484583692  | 4.36E-33  | postive  |
| BECN1     | AC022306.2 | -0.413152127 | 1.23E-23  | negative |
| HELLS     | TAPT1-AS1  | 0.475879206  | 8.20E-32  | postive  |
| MTOR      | TAPT1-AS1  | 0.40057185   | 3.43E-22  | postive  |
| ZNF419    | TAPT1-AS1  | 0.463786564  | 4.22E-30  | postive  |
| KLHL24    | TAPT1-AS1  | 0.421140622  | 1.39E-24  | postive  |
| TUBE1     | TAPT1-AS1  | 0.453947052  | 9.30E-29  | postive  |
| ALOX12    | TAPT1-AS1  | 0.44592356   | 1.08E-27  | postive  |
| IREB2     | TAPT1-AS1  | 0.415559528  | 6.43E-24  | postive  |
| GABPB1    | TAPT1-AS1  | 0.532418928  | 8.69E-41  | postive  |
| MAPK8     | TAPT1-AS1  | 0.426441874  | 3.15E-25  | postive  |
| LINC00472 | TAPT1-AS1  | 0.646425137  | 4.30E-65  | postive  |
| LPIN1     | TAPT1-AS1  | 0.476495055  | 6.68E-32  | postive  |
| ATM       | TAPT1-AS1  | 0.60957487   | 3.80E-56  | postive  |
| FBXW7     | TAPT1-AS1  | 0.526268619  | 9.97E-40  | postive  |
| HELLS     | AL158163.1 | 0.524408033  | 2.07E-39  | postive  |
| ZNF419    | AL158163.1 | 0.515191152  | 7.14E-38  | postive  |
| KLHL24    | AL158163.1 | 0.4222106    | 1.03E-24  | postive  |
| TUBE1     | AL158163.1 | 0.56755879   | 2.79E-47  | postive  |
| ALOX12    | AL158163.1 | 0.58186205   | 3.73E-50  | postive  |
| GABPB1    | AL158163.1 | 0.611635159  | 1.29E-56  | postive  |
| MAPK8     | AL158163.1 | 0.456786748  | 3.85E-29  | postive  |
| LINC00472 | AL158163.1 | 0.762018066  | 2.04E-103 | postive  |
| ATM       | AL158163.1 | 0.654246907  | 3.74E-67  | postive  |
| FBXW7     | AL158163.1 | 0.520741997  | 8.57E-39  | postive  |
| CHMP6     | AC007114.1 | 0.423753068  | 6.71E-25  | postive  |
| WIPI1     | AC007114.1 | 0.45457142   | 7.67E-29  | postive  |
| GPX4      | SNHG6      | 0.401285901  | 2.85E-22  | postive  |
| HSPB1     | SNHG6      | 0.41791558   | 3.38E-24  | postive  |
| HSF1      | SNHG6      | 0.617981234  | 4.40E-58  | postive  |
| STAT3     | SNHG6      | -0.415359496 | 6.79E-24  | negative |
| MTOR      | SNHG6      | -0.478581681 | 3.33E-32  | negative |
| RPL8      | SNHG6      | 0.707521036  | 5.28E-83  | postive  |
| IREB2     | SNHG6      | -0.433229184 | 4.54E-26  | negative |
| RIPK1     | SNHG6      | -0.415446869 | 6.63E-24  | negative |
| HRAS      | SNHG6      | 0.412240313  | 1.58E-23  | postive  |
| BECN1     | SNHG6      | -0.427683718 | 2.22E-25  | negative |
| MAPK1     | SNHG6      | -0.406979623 | 6.42E-23  | negative |
| BID       | SNHG6      | 0.470318531  | 5.12E-31  | postive  |
| ALOX12    | LINC00671  | 0.408251744  | 4.58E-23  | postive  |
| MIOX      | LINC00671  | 0.511046459  | 3.39E-37  | postive  |

|           |            |              |           |          |
|-----------|------------|--------------|-----------|----------|
| MTOR      | LINC00863  | 0.472758515  | 2.30E-31  | postive  |
| SETD1B    | LINC00863  | 0.408894362  | 3.87E-23  | postive  |
| MAPK14    | LINC00863  | 0.521140329  | 7.35E-39  | postive  |
| IREB2     | LINC00863  | 0.474661896  | 1.23E-31  | postive  |
| BECN1     | LINC00863  | 0.411193516  | 2.09E-23  | postive  |
| ULK2      | LINC00863  | 0.476121091  | 7.57E-32  | postive  |
| MAPK8     | LINC00863  | 0.42082716   | 1.51E-24  | postive  |
| ATM       | LINC00863  | 0.415167835  | 7.15E-24  | postive  |
| HRAS      | AC114341.1 | 0.45186992   | 1.76E-28  | postive  |
| EGLN2     | AC114341.1 | 0.560294356  | 7.10E-46  | postive  |
| SLC3A2    | PRDM16-DT  | 0.405772491  | 8.83E-23  | postive  |
| FH        | PRDM16-DT  | 0.407926032  | 5.00E-23  | postive  |
| ISCU      | PRDM16-DT  | 0.584610287  | 1.01E-50  | postive  |
| DDIT3     | PRDM16-DT  | 0.558261295  | 1.73E-45  | postive  |
| SLC2A8    | PRDM16-DT  | 0.445051103  | 1.40E-27  | postive  |
| SLC2A12   | PRDM16-DT  | 0.453653881  | 1.02E-28  | postive  |
| GOT1      | PRDM16-DT  | 0.404301257  | 1.30E-22  | postive  |
| ATG4D     | PRDM16-DT  | 0.566888811  | 3.77E-47  | postive  |
| MAP1LC3A  | PRDM16-DT  | 0.667579318  | 8.22E-71  | postive  |
| GABARAPL1 | PRDM16-DT  | 0.723327539  | 2.04E-88  | postive  |
| WIPI2     | PRDM16-DT  | 0.533462722  | 5.71E-41  | postive  |
| BAP1      | PRDM16-DT  | 0.446058485  | 1.03E-27  | postive  |
| LPIN1     | PRDM16-DT  | 0.567713537  | 2.60E-47  | postive  |
| EGLN2     | PRDM16-DT  | 0.422193261  | 1.04E-24  | postive  |
| HRAS      | WDR5-DT    | 0.409104753  | 3.65E-23  | postive  |
| EGLN2     | WDR5-DT    | 0.406571564  | 7.15E-23  | postive  |
| TAZ       | WDR5-DT    | 0.47934876   | 2.57E-32  | postive  |
| NOX1      | AC124016.1 | 0.587193402  | 2.91E-51  | postive  |
| BECN1     | AC124016.1 | -0.496936088 | 5.83E-35  | negative |
| ZNF419    | AC005306.1 | 0.518677302  | 1.89E-38  | postive  |
| VEGFA     | AC005306.1 | 0.489584068  | 7.76E-34  | postive  |
| TUBE1     | AC005306.1 | 0.494748942  | 1.27E-34  | postive  |
| SETD1B    | AC005306.1 | 0.428494804  | 1.76E-25  | postive  |
| DRD4      | AC005306.1 | 0.447891089  | 5.94E-28  | postive  |
| ALOX12    | AC005306.1 | 0.533108662  | 6.59E-41  | postive  |
| PHKG2     | AC005306.1 | 0.559494943  | 1.01E-45  | postive  |
| TAZ       | AC005306.1 | 0.768852592  | 2.29E-106 | postive  |
| HELLS     | SCARNA9    | 0.495791209  | 8.77E-35  | postive  |
| GABPB1    | SCARNA9    | 0.475947586  | 8.02E-32  | postive  |
| ATG7      | SCARNA9    | 0.439012678  | 8.42E-27  | postive  |
| LINC00472 | SCARNA9    | 0.559907665  | 8.42E-46  | postive  |
| ATM       | SCARNA9    | 0.681005965  | 1.08E-74  | postive  |
| FBXW7     | SCARNA9    | 0.490204575  | 6.25E-34  | postive  |
| HELLS     | ANKRD10-IT | 0.504366028  | 4.00E-36  | postive  |
| ZNF419    | ANKRD10-IT | 0.55579527   | 5.07E-45  | postive  |
| KLHL24    | ANKRD10-IT | 0.408457943  | 4.34E-23  | postive  |
| TUBE1     | ANKRD10-IT | 0.629672587  | 7.09E-61  | postive  |
| SETD1B    | ANKRD10-IT | 0.431687856  | 7.08E-26  | postive  |
| ALOX12    | ANKRD10-IT | 0.587584572  | 2.41E-51  | postive  |
| GABPB1    | ANKRD10-IT | 0.652580586  | 1.04E-66  | postive  |
| MAPK8     | ANKRD10-IT | 0.472895148  | 2.20E-31  | postive  |
| LINC00472 | ANKRD10-IT | 0.718935908  | 7.09E-87  | postive  |
| ATM       | ANKRD10-IT | 0.695538099  | 3.90E-79  | postive  |
| FBXW7     | ANKRD10-IT | 0.587450279  | 2.57E-51  | postive  |
| PHKG2     | AC010719.1 | 0.498437884  | 3.41E-35  | postive  |
| TAZ       | AC010719.1 | 0.543751453  | 8.47E-43  | postive  |
| SRC       | AC002401.4 | 0.421926918  | 1.12E-24  | postive  |
| ZNF419    | ZNF213-AS1 | 0.536431042  | 1.72E-41  | postive  |

|           |            |              |          |          |
|-----------|------------|--------------|----------|----------|
| VEGFA     | ZNF213-AS1 | 0.422986462  | 8.31E-25 | postive  |
| TUBE1     | ZNF213-AS1 | 0.551731565  | 2.92E-44 | postive  |
| DRD4      | ZNF213-AS1 | 0.473672823  | 1.70E-31 | postive  |
| ALOX12    | ZNF213-AS1 | 0.639815627  | 2.13E-63 | postive  |
| PHKG2     | ZNF213-AS1 | 0.636848941  | 1.19E-62 | postive  |
| TAZ       | ZNF213-AS1 | 0.692863278  | 2.68E-78 | postive  |
| GPX4      | AP001189.3 | -0.406934789 | 6.50E-23 | negative |
| STAT3     | AP001189.3 | 0.433059162  | 4.77E-26 | postive  |
| SLC1A4    | AP001189.3 | 0.432461722  | 5.67E-26 | postive  |
| IL33      | AP001189.3 | 0.457019918  | 3.58E-29 | postive  |
| HIC1      | AP001189.3 | 0.435950777  | 2.06E-26 | postive  |
| RIPK1     | AP001189.3 | 0.403611371  | 1.56E-22 | postive  |
| ZEB1      | AP001189.3 | 0.657517009  | 4.93E-68 | postive  |
| EPAS1     | AP001189.3 | 0.715942021  | 7.67E-86 | postive  |
| HELLS     | AC109454.2 | 0.515832777  | 5.60E-38 | postive  |
| ALOX12    | AC109454.2 | 0.429926474  | 1.17E-25 | postive  |
| GABPB1    | AC109454.2 | 0.401737289  | 2.54E-22 | postive  |
| DUOX1     | AC109454.2 | 0.407637583  | 5.40E-23 | postive  |
| ATM       | AC109454.2 | 0.48560921   | 3.07E-33 | postive  |
| HELLS     | AC253576.2 | 0.505039462  | 3.13E-36 | postive  |
| ZNF419    | AC253576.2 | 0.461785115  | 7.98E-30 | postive  |
| TUBE1     | AC253576.2 | 0.560522351  | 6.43E-46 | postive  |
| ALOX12    | AC253576.2 | 0.425636964  | 3.95E-25 | postive  |
| GABPB1    | AC253576.2 | 0.588064711  | 1.91E-51 | postive  |
| LINC00472 | AC253576.2 | 0.704116328  | 6.95E-82 | postive  |
| ATM       | AC253576.2 | 0.583705743  | 1.55E-50 | postive  |
| FBXW7     | AC253576.2 | 0.487221023  | 1.76E-33 | postive  |
| HELLS     | AC113143.1 | 0.422027472  | 1.09E-24 | postive  |
| TFAP2C    | AC113143.1 | 0.51278714   | 1.77E-37 | postive  |
| HBA1      | AC113143.1 | 0.534544787  | 3.69E-41 | postive  |
| DUOX1     | AC113143.1 | 0.429856919  | 1.20E-25 | postive  |
| SLC3A2    | AL035661.1 | 0.429833133  | 1.20E-25 | postive  |
| FH        | AL035661.1 | 0.443717001  | 2.09E-27 | postive  |
| ISCU      | AL035661.1 | 0.577982516  | 2.32E-49 | postive  |
| KLHL24    | AL035661.1 | 0.403144033  | 1.76E-22 | postive  |
| SLC2A8    | AL035661.1 | 0.467208997  | 1.41E-30 | postive  |
| GOT1      | AL035661.1 | 0.422816481  | 8.71E-25 | postive  |
| ATG4D     | AL035661.1 | 0.561991961  | 3.36E-46 | postive  |
| MAP1LC3A  | AL035661.1 | 0.421190121  | 1.37E-24 | postive  |
| GABARAPL2 | AL035661.1 | 0.518119391  | 2.34E-38 | postive  |
| GABARAPL1 | AL035661.1 | 0.659793494  | 1.18E-68 | postive  |
| LPIN1     | AL035661.1 | 0.526881982  | 7.84E-40 | postive  |
| PLIN2     | AC002401.2 | 0.45120206   | 2.17E-28 | postive  |
| HNF4A     | AC002401.2 | 0.440004363  | 6.28E-27 | postive  |
| LPCAT3    | AC002401.2 | 0.44524613   | 1.32E-27 | postive  |
| MAPK1     | AC002401.2 | 0.445507807  | 1.22E-27 | postive  |
| VEGFA     | BX255925.1 | 0.521771935  | 5.75E-39 | postive  |
| HIC1      | BX255925.1 | 0.544147982  | 7.18E-43 | postive  |
| MAPK3     | BX255925.1 | 0.407366953  | 5.80E-23 | postive  |
| ZEB1      | BX255925.1 | 0.510777845  | 3.75E-37 | postive  |
| EPAS1     | BX255925.1 | 0.5149808    | 7.73E-38 | postive  |
| SP1       | AC103740.1 | 0.455046368  | 6.62E-29 | postive  |
| ATM       | AC103740.1 | 0.468687821  | 8.71E-31 | postive  |
| HELLS     | AC008115.3 | 0.491979904  | 3.36E-34 | postive  |
| ZNF419    | AC008115.3 | 0.467582059  | 1.25E-30 | postive  |
| VEGFA     | AC008115.3 | 0.406955367  | 6.46E-23 | postive  |
| TUBE1     | AC008115.3 | 0.567537831  | 2.81E-47 | postive  |
| SETD1B    | AC008115.3 | 0.407493707  | 5.61E-23 | postive  |

|           |            |             |          |         |
|-----------|------------|-------------|----------|---------|
| ALOX12    | AC008115.3 | 0.60242798  | 1.52E-54 | postive |
| GABPB1    | AC008115.3 | 0.532458946 | 8.55E-41 | postive |
| LINC00472 | AC008115.3 | 0.407958346 | 4.96E-23 | postive |
| ATM       | AC008115.3 | 0.683132647 | 2.51E-75 | postive |
| FBXW7     | AC008115.3 | 0.593577213 | 1.29E-52 | postive |
| VEGFA     | CEBPB-AS1  | 0.45154541  | 1.95E-28 | postive |
| ALOX12    | CEBPB-AS1  | 0.432517074 | 5.58E-26 | postive |
| SLC2A6    | EXOSC10-AS | 0.415210924 | 7.07E-24 | postive |
| SLC2A8    | EXOSC10-AS | 0.416776105 | 4.62E-24 | postive |
| VDAC2     | NCKAP5-AS2 | 0.414340133 | 8.96E-24 | postive |
| ISCU      | NCKAP5-AS2 | 0.676853557 | 1.80E-73 | postive |
| TMBIM4    | NCKAP5-AS2 | 0.543952091 | 7.79E-43 | postive |
| CHMP5     | NCKAP5-AS2 | 0.448757578 | 4.57E-28 | postive |
| DDIT3     | NCKAP5-AS2 | 0.443292783 | 2.37E-27 | postive |
| GOT1      | NCKAP5-AS2 | 0.500788405 | 1.47E-35 | postive |
| ATG4D     | NCKAP5-AS2 | 0.483373247 | 6.59E-33 | postive |
| MAP1LC3A  | NCKAP5-AS2 | 0.448385189 | 5.11E-28 | postive |
| GABARAPL2 | NCKAP5-AS2 | 0.553487593 | 1.37E-44 | postive |
| GABARAPL1 | NCKAP5-AS2 | 0.444224725 | 1.79E-27 | postive |
| TUBE1     | AP001767.2 | 0.488097434 | 1.30E-33 | postive |
| ALOX12    | AP001767.2 | 0.543975845 | 7.72E-43 | postive |
| PHKG2     | AP001767.2 | 0.471395373 | 3.60E-31 | postive |
| TAZ       | AP001767.2 | 0.548804517 | 1.02E-43 | postive |
| HELLS     | ODF2-AS1   | 0.428017019 | 2.02E-25 | postive |
| ZNF419    | ODF2-AS1   | 0.442882112 | 2.68E-27 | postive |
| TUBE1     | ODF2-AS1   | 0.510171646 | 4.70E-37 | postive |
| ALOX12    | ODF2-AS1   | 0.460476089 | 1.21E-29 | postive |
| GABPB1    | ODF2-AS1   | 0.513367782 | 1.42E-37 | postive |
| LINC00472 | ODF2-AS1   | 0.518740534 | 1.85E-38 | postive |
| ATM       | ODF2-AS1   | 0.510568712 | 4.05E-37 | postive |
| FBXW7     | ODF2-AS1   | 0.472939818 | 2.17E-31 | postive |
| TUBE1     | ZEB1-AS1   | 0.438856358 | 8.81E-27 | postive |
| ALOX12    | ZEB1-AS1   | 0.428535019 | 1.74E-25 | postive |
| GABPB1    | ZEB1-AS1   | 0.434314049 | 3.32E-26 | postive |
| MAPK8     | ZEB1-AS1   | 0.406820126 | 6.70E-23 | postive |
| SLC3A2    | LINC02568  | 0.403928026 | 1.43E-22 | postive |
| ISCU      | LINC02568  | 0.482638091 | 8.46E-33 | postive |
| DDIT3     | LINC02568  | 0.43541178  | 2.41E-26 | postive |
| SLC2A12   | LINC02568  | 0.450151196 | 2.99E-28 | postive |
| TFAP2C    | LINC02568  | 0.402020284 | 2.36E-22 | postive |
| ATG4D     | LINC02568  | 0.495466644 | 9.84E-35 | postive |
| MAP1LC3A  | LINC02568  | 0.427689688 | 2.21E-25 | postive |
| GABARAPL1 | LINC02568  | 0.617535468 | 5.59E-58 | postive |
| WIP1      | LINC02568  | 0.406667968 | 6.97E-23 | postive |
| LPIN1     | LINC02568  | 0.506977935 | 1.53E-36 | postive |
| HELLS     | AC010680.2 | 0.553844057 | 1.18E-44 | postive |
| TUBE1     | AC010680.2 | 0.531982597 | 1.03E-40 | postive |
| ALOX12    | AC010680.2 | 0.479107128 | 2.79E-32 | postive |
| GABPB1    | AC010680.2 | 0.574932414 | 9.58E-49 | postive |
| MAPK8     | AC010680.2 | 0.423900957 | 6.44E-25 | postive |
| LINC00472 | AC010680.2 | 0.621952188 | 5.11E-59 | postive |
| ATM       | AC010680.2 | 0.725485017 | 3.48E-89 | postive |
| FBXW7     | AC010680.2 | 0.469675816 | 6.32E-31 | postive |
| MAPK14    | ANAPC1P2   | 0.402646587 | 2.00E-22 | postive |
| IREB2     | ANAPC1P2   | 0.413361135 | 1.17E-23 | postive |
| SP1       | ANAPC1P2   | 0.429225271 | 1.43E-25 | postive |
| ZEB1      | ANAPC1P2   | 0.40405854  | 1.38E-22 | postive |
| MAPK8     | ANAPC1P2   | 0.410445543 | 2.56E-23 | postive |

|           |             |              |           |          |
|-----------|-------------|--------------|-----------|----------|
| GPX4      | AL035420.3  | 0.472628975  | 2.40E-31  | postive  |
| OTUB1     | AL035420.3  | 0.40404854   | 1.39E-22  | postive  |
| ZNF419    | STAG3L5P-P' | 0.435018898  | 2.71E-26  | postive  |
| VEGFA     | STAG3L5P-P' | 0.418656024  | 2.76E-24  | postive  |
| TUBE1     | STAG3L5P-P' | 0.571160938  | 5.43E-48  | postive  |
| DRD4      | STAG3L5P-P' | 0.424661265  | 5.20E-25  | postive  |
| ALOX12    | STAG3L5P-P' | 0.552164381  | 2.43E-44  | postive  |
| PHKG2     | STAG3L5P-P' | 0.590158794  | 6.89E-52  | postive  |
| TAZ       | STAG3L5P-P' | 0.728114526  | 3.93E-90  | postive  |
| MAFG      | AC010271.1  | 0.420500958  | 1.66E-24  | postive  |
| ALOX12    | AC010271.1  | 0.404874675  | 1.12E-22  | postive  |
| HELLS     | AL133445.2  | 0.512215983  | 2.19E-37  | postive  |
| TUBE1     | AL133445.2  | 0.419208692  | 2.37E-24  | postive  |
| GABPB1    | AL133445.2  | 0.538449574  | 7.56E-42  | postive  |
| ATG7      | AL133445.2  | 0.457565681  | 3.02E-29  | postive  |
| LINC00472 | AL133445.2  | 0.717482598  | 2.26E-86  | postive  |
| ATM       | AL133445.2  | 0.697411492  | 9.98E-80  | postive  |
| FBXW7     | AL133445.2  | 0.426864752  | 2.80E-25  | postive  |
| HELLS     | AC016949.1  | 0.478460849  | 3.47E-32  | postive  |
| KLHL24    | AC016949.1  | 0.410608501  | 2.45E-23  | postive  |
| TUBE1     | AC016949.1  | 0.427724363  | 2.19E-25  | postive  |
| ALOX12    | AC016949.1  | 0.423100249  | 8.05E-25  | postive  |
| GABPB1    | AC016949.1  | 0.538534519  | 7.30E-42  | postive  |
| LINC00472 | AC016949.1  | 0.812476829  | 6.14E-128 | postive  |
| ATM       | AC016949.1  | 0.568389062  | 1.91E-47  | postive  |
| FBXW7     | AC016949.1  | 0.47273759   | 2.32E-31  | postive  |
| ISCU      | AL161729.1  | 0.535832075  | 2.19E-41  | postive  |
| KLHL24    | AL161729.1  | 0.402486108  | 2.09E-22  | postive  |
| ATG4D     | AL161729.1  | 0.448409994  | 5.07E-28  | postive  |
| MAP1LC3A  | AL161729.1  | 0.428983384  | 1.53E-25  | postive  |
| GABARAPL2 | AL161729.1  | 0.405743211  | 8.90E-23  | postive  |
| GABARAPL1 | AL161729.1  | 0.535369257  | 2.65E-41  | postive  |
| BAP1      | AL161729.1  | 0.492662019  | 2.65E-34  | postive  |
| LPIN1     | AL161729.1  | 0.462126976  | 7.16E-30  | postive  |
| ZNF419    | LINC01160   | 0.427157083  | 2.58E-25  | postive  |
| TUBE1     | LINC01160   | 0.40962742   | 3.18E-23  | postive  |
| ALOX12    | LINC01160   | 0.461187692  | 9.65E-30  | postive  |
| PHKG2     | LINC01160   | 0.60736193   | 1.20E-55  | postive  |
| TAZ       | LINC01160   | 0.675615564  | 4.14E-73  | postive  |
| RB1       | AC096921.2  | 0.403681322  | 1.53E-22  | postive  |
| IL33      | AC096921.2  | 0.410766522  | 2.35E-23  | postive  |
| IREB2     | AC096921.2  | 0.403621211  | 1.55E-22  | postive  |
| HMGB1     | AC096921.2  | 0.538743101  | 6.70E-42  | postive  |
| CAPG      | AC096921.2  | -0.401798848 | 2.50E-22  | negative |
| GABPB1    | AC096921.2  | 0.525173361  | 1.53E-39  | postive  |
| PIK3CA    | AC096921.2  | 0.434187557  | 3.44E-26  | postive  |
| KRAS      | AC096921.2  | 0.473792531  | 1.64E-31  | postive  |
| ZEB1      | AC096921.2  | 0.680519559  | 1.51E-74  | postive  |
| MAPK8     | AC096921.2  | 0.575315428  | 8.02E-49  | postive  |
| PRKAA1    | AC096921.2  | 0.499409054  | 2.41E-35  | postive  |
| EPAS1     | AC096921.2  | 0.615942507  | 1.31E-57  | postive  |
| ATM       | AC096921.2  | 0.404228725  | 1.32E-22  | postive  |
| SIRT1     | AC096921.2  | 0.488292219  | 1.22E-33  | postive  |
| TUBE1     | AP000553.2  | 0.484773999  | 4.08E-33  | postive  |
| ALOX12    | AP000553.2  | 0.476075289  | 7.69E-32  | postive  |
| PHKG2     | AP000553.2  | 0.500365858  | 1.71E-35  | postive  |
| TAZ       | AP000553.2  | 0.557098082  | 2.88E-45  | postive  |
| GDF15     | AC026369.1  | 0.415479728  | 6.57E-24  | postive  |



|           |            |             |           |         |
|-----------|------------|-------------|-----------|---------|
| AGPAT3    | AC026369.1 | 0.468343437 | 9.74E-31  | postive |
| MIOX      | AC026369.1 | 0.444676267 | 1.57E-27  | postive |
| HELLS     | AL133243.2 | 0.526962254 | 7.59E-40  | postive |
| KLHL24    | AL133243.2 | 0.50006564  | 1.90E-35  | postive |
| TUBE1     | AL133243.2 | 0.438948776 | 8.58E-27  | postive |
| IREB2     | AL133243.2 | 0.451607846 | 1.91E-28  | postive |
| GABPB1    | AL133243.2 | 0.592244256 | 2.48E-52  | postive |
| PIK3CA    | AL133243.2 | 0.475282496 | 1.00E-31  | postive |
| KRAS      | AL133243.2 | 0.432159499 | 6.18E-26  | postive |
| MAPK8     | AL133243.2 | 0.446849056 | 8.14E-28  | postive |
| LINC00472 | AL133243.2 | 0.80166323  | 4.30E-122 | postive |
| PRKAA1    | AL133243.2 | 0.448439314 | 5.03E-28  | postive |
| ATM       | AL133243.2 | 0.68391347  | 1.46E-75  | postive |
| FBXW7     | AL133243.2 | 0.45872359  | 2.10E-29  | postive |
| BACH1     | AL133243.2 | 0.426955479 | 2.73E-25  | postive |
| HELLS     | AC008667.1 | 0.404005387 | 1.40E-22  | postive |
| TFAP2C    | AC008667.1 | 0.458291295 | 2.40E-29  | postive |
| HBA1      | AC008667.1 | 0.434228812 | 3.40E-26  | postive |
| DUOX1     | AC008667.1 | 0.415971745 | 5.75E-24  | postive |
| GPX4      | LINC01023  | 0.412431192 | 1.50E-23  | postive |
| HSPB1     | LINC01023  | 0.483965723 | 5.38E-33  | postive |
| RPL8      | LINC01023  | 0.441931646 | 3.55E-27  | postive |
| HBA1      | LINC01023  | 0.624931963 | 9.94E-60  | postive |
| HRAS      | LINC01023  | 0.767738477 | 7.04E-106 | postive |
| MAP1LC3A  | LINC01023  | 0.517430321 | 3.05E-38  | postive |
| EGLN2     | LINC01023  | 0.856845611 | 1.27E-156 | postive |
| KLHL24    | AC058791.1 | 0.576017025 | 5.79E-49  | postive |
| GABPB1    | AC058791.1 | 0.424103811 | 6.08E-25  | postive |
| PIK3CA    | AC058791.1 | 0.467875464 | 1.13E-30  | postive |
| KRAS      | AC058791.1 | 0.410436261 | 2.56E-23  | postive |
| LINC00472 | AC058791.1 | 0.950934329 | 9.17E-276 | postive |
| HELLS     | GMDS-DT    | 0.539990776 | 4.02E-42  | postive |
| TUBE1     | GMDS-DT    | 0.527484481 | 6.18E-40  | postive |
| ALOX12    | GMDS-DT    | 0.480780101 | 1.59E-32  | postive |
| IREB2     | GMDS-DT    | 0.449137114 | 4.07E-28  | postive |
| GABPB1    | GMDS-DT    | 0.564881309 | 9.28E-47  | postive |
| PIK3CA    | GMDS-DT    | 0.41282353  | 1.35E-23  | postive |
| ATG7      | GMDS-DT    | 0.498480169 | 3.36E-35  | postive |
| MAPK8     | GMDS-DT    | 0.466992635 | 1.51E-30  | postive |
| LINC00472 | GMDS-DT    | 0.640882794 | 1.14E-63  | postive |
| PRKAA2    | GMDS-DT    | 0.421582717 | 1.23E-24  | postive |
| ATM       | GMDS-DT    | 0.810264666 | 1.03E-126 | postive |
| FBXW7     | GMDS-DT    | 0.548256272 | 1.28E-43  | postive |
| HELLS     | ALMS1-IT1  | 0.569484449 | 1.17E-47  | postive |
| LINC00472 | ALMS1-IT1  | 0.558302353 | 1.70E-45  | postive |
| ATM       | ALMS1-IT1  | 0.484317185 | 4.77E-33  | postive |
| HELLS     | AC011468.1 | 0.465549026 | 2.40E-30  | postive |
| ZNF419    | AC011468.1 | 0.58879059  | 1.34E-51  | postive |
| TUBE1     | AC011468.1 | 0.481910285 | 1.08E-32  | postive |
| ALOX12    | AC011468.1 | 0.406601514 | 7.10E-23  | postive |
| GABPB1    | AC011468.1 | 0.507846595 | 1.11E-36  | postive |
| PHKG2     | AC011468.1 | 0.457025239 | 3.57E-29  | postive |
| LINC00472 | AC011468.1 | 0.440204567 | 5.92E-27  | postive |
| TAZ       | AC011468.1 | 0.509850313 | 5.30E-37  | postive |
| FBXW7     | AC011468.1 | 0.488269867 | 1.22E-33  | postive |
| TFAP2C    | SNED1-AS1  | 0.560899155 | 5.44E-46  | postive |
| HBA1      | SNED1-AS1  | 0.503641603 | 5.21E-36  | postive |
| DUOX1     | SNED1-AS1  | 0.434334903 | 3.30E-26  | postive |

|           |            |             |           |         |
|-----------|------------|-------------|-----------|---------|
| ZNF419    | HIF1A-AS3  | 0.402496671 | 2.08E-22  | postive |
| VEGFA     | HIF1A-AS3  | 0.505335013 | 2.80E-36  | postive |
| TUBE1     | HIF1A-AS3  | 0.491087931 | 4.60E-34  | postive |
| ALOX12    | HIF1A-AS3  | 0.562057088 | 3.26E-46  | postive |
| IREB2     | HIF1A-AS3  | 0.412517756 | 1.47E-23  | postive |
| GABPB1    | HIF1A-AS3  | 0.479942382 | 2.11E-32  | postive |
| ZEB1      | HIF1A-AS3  | 0.419839072 | 1.99E-24  | postive |
| MAPK8     | HIF1A-AS3  | 0.512920116 | 1.68E-37  | postive |
| LINC00472 | HIF1A-AS3  | 0.470372184 | 5.03E-31  | postive |
| ATM       | HIF1A-AS3  | 0.683023197 | 2.71E-75  | postive |
| FBXW7     | HIF1A-AS3  | 0.421965174 | 1.10E-24  | postive |
| CD44      | TBILA      | 0.430314397 | 1.05E-25  | postive |
| SOCS1     | TBILA      | 0.613373784 | 5.16E-57  | postive |
| DDIT3     | BX539320.1 | 0.428458438 | 1.78E-25  | postive |
| ATG4D     | BX539320.1 | 0.453568336 | 1.05E-28  | postive |
| MAP1LC3A  | BX539320.1 | 0.407200318 | 6.06E-23  | postive |
| HBA1      | AL359962.1 | 0.408905258 | 3.85E-23  | postive |
| SLC7A11   | LINC01270  | 0.407731946 | 5.26E-23  | postive |
| TXNRD1    | LINC01270  | 0.470698141 | 4.53E-31  | postive |
| RRM2      | LINC01270  | 0.411352897 | 2.00E-23  | postive |
| AURKA     | LINC01270  | 0.446402455 | 9.31E-28  | postive |
| G6PD      | LINC01270  | 0.410680908 | 2.40E-23  | postive |
| TFAP2C    | AC090114.2 | 0.419480384 | 2.20E-24  | postive |
| HBA1      | AC090114.2 | 0.426912452 | 2.76E-25  | postive |
| FANCD2    | AC099850.3 | 0.660447232 | 7.85E-69  | postive |
| HELLS     | AC099850.3 | 0.424561597 | 5.35E-25  | postive |
| STMN1     | AC099850.3 | 0.700500908 | 1.03E-80  | postive |
| RRM2      | AC099850.3 | 0.802868596 | 1.00E-122 | postive |
| AURKA     | AC099850.3 | 0.761694786 | 2.80E-103 | postive |
| CDKN2A    | AC099850.3 | 0.594883114 | 6.74E-53  | postive |
| PANX1     | AC099850.3 | 0.41457191  | 8.41E-24  | postive |
| SLC3A2    | ST3GAL6-AS | 0.424045758 | 6.18E-25  | postive |
| FH        | ST3GAL6-AS | 0.424754035 | 5.07E-25  | postive |
| ISCU      | ST3GAL6-AS | 0.441445795 | 4.10E-27  | postive |
| GOT1      | ST3GAL6-AS | 0.415883515 | 5.89E-24  | postive |
| ATG4D     | ST3GAL6-AS | 0.404384249 | 1.27E-22  | postive |
| GABARAPL1 | ST3GAL6-AS | 0.602409612 | 1.53E-54  | postive |
| LPIN1     | ST3GAL6-AS | 0.43800963  | 1.13E-26  | postive |
| VEGFA     | AC104964.3 | 0.426310353 | 3.27E-25  | postive |
| TUBE1     | AC104964.3 | 0.561319256 | 4.52E-46  | postive |
| ALOX12    | AC104964.3 | 0.481454336 | 1.26E-32  | postive |
| TAZ       | AC104964.3 | 0.517363252 | 3.13E-38  | postive |
| HELLS     | AL136115.2 | 0.535360482 | 2.66E-41  | postive |
| ALOX12    | AL136115.2 | 0.417736297 | 3.55E-24  | postive |
| GABPB1    | AL136115.2 | 0.51831039  | 2.18E-38  | postive |
| LINC00472 | AL136115.2 | 0.759133536 | 3.35E-102 | postive |
| ATM       | AL136115.2 | 0.549754172 | 6.79E-44  | postive |
| FBXW7     | AL136115.2 | 0.438012731 | 1.13E-26  | postive |
| TFAP2C    | AP000255.1 | 0.486136981 | 2.56E-33  | postive |
| HBA1      | AP000255.1 | 0.565980473 | 5.67E-47  | postive |
| ANO6      | AC115618.2 | 0.41213987  | 1.62E-23  | postive |
| HELLS     | AC116552.1 | 0.42853928  | 1.74E-25  | postive |
| ZNF419    | AC116552.1 | 0.519072702 | 1.63E-38  | postive |
| TUBE1     | AC116552.1 | 0.517866876 | 2.58E-38  | postive |
| ALOX12    | AC116552.1 | 0.589026193 | 1.20E-51  | postive |
| GABPB1    | AC116552.1 | 0.480749355 | 1.60E-32  | postive |
| LINC00472 | AC116552.1 | 0.569029875 | 1.43E-47  | postive |
| ATM       | AC116552.1 | 0.551108893 | 3.81E-44  | postive |

|           |             |              |           |          |
|-----------|-------------|--------------|-----------|----------|
| FBXW7     | AC116552.1  | 0.433742629  | 3.92E-26  | postive  |
| VDAC2     | AC007405.3  | 0.402295047  | 2.19E-22  | postive  |
| TMBIM4    | AC007405.3  | 0.455038213  | 6.63E-29  | postive  |
| HELLS     | TRAF3IP2-AS | 0.526125153  | 1.05E-39  | postive  |
| ZNF419    | TRAF3IP2-AS | 0.498957918  | 2.83E-35  | postive  |
| TUBE1     | TRAF3IP2-AS | 0.623129258  | 2.68E-59  | postive  |
| ALOX12    | TRAF3IP2-AS | 0.586972924  | 3.23E-51  | postive  |
| IREB2     | TRAF3IP2-AS | 0.460259213  | 1.29E-29  | postive  |
| GABPB1    | TRAF3IP2-AS | 0.670143373  | 1.55E-71  | postive  |
| ZEB1      | TRAF3IP2-AS | 0.45662524   | 4.05E-29  | postive  |
| MAPK8     | TRAF3IP2-AS | 0.559146629  | 1.18E-45  | postive  |
| LINC00472 | TRAF3IP2-AS | 0.60287192   | 1.21E-54  | postive  |
| ATM       | TRAF3IP2-AS | 0.730341142  | 6.09E-91  | postive  |
| FBXW7     | TRAF3IP2-AS | 0.541683234  | 2.00E-42  | postive  |
| JDP2      | MEG3        | 0.627807546  | 2.01E-60  | postive  |
| RGS4      | MEG3        | 0.46425004   | 3.64E-30  | postive  |
| EIF2S1    | MEG3        | 0.407649363  | 5.38E-23  | postive  |
| FANCD2    | AL078587.1  | 0.453114703  | 1.20E-28  | postive  |
| HELLS     | AL078587.1  | 0.472953579  | 2.16E-31  | postive  |
| ZNF419    | AL078587.1  | 0.410656167  | 2.42E-23  | postive  |
| ALOX12    | AL078587.1  | 0.547208286  | 1.99E-43  | postive  |
| DUOX1     | AL078587.1  | 0.405100741  | 1.05E-22  | postive  |
| HELLS     | AL157394.1  | 0.545896181  | 3.46E-43  | postive  |
| GABPB1    | AL157394.1  | 0.404980797  | 1.09E-22  | postive  |
| ATM       | AL157394.1  | 0.525112844  | 1.57E-39  | postive  |
| FBXW7     | AL157394.1  | 0.413685198  | 1.07E-23  | postive  |
| GPX4      | AC008608.2  | 0.483858765  | 5.58E-33  | postive  |
| CHMP6     | AC008608.2  | 0.420155692  | 1.82E-24  | postive  |
| RPL8      | AC008608.2  | 0.409392885  | 3.38E-23  | postive  |
| HRAS      | AC008608.2  | 0.63679299   | 1.23E-62  | postive  |
| BECN1     | AC008608.2  | -0.432904287 | 4.99E-26  | negative |
| EGLN2     | AC008608.2  | 0.462287697  | 6.81E-30  | postive  |
| TAZ       | AC008608.2  | 0.40545804   | 9.59E-23  | postive  |
| TFAP2C    | MAFTRR      | 0.490262992  | 6.13E-34  | postive  |
| HBA1      | MAFTRR      | 0.489026262  | 9.42E-34  | postive  |
| PROM2     | LINC01702   | 0.420095674  | 1.85E-24  | postive  |
| ISCU      | AP000787.1  | 0.441643651  | 3.87E-27  | postive  |
| KLHL24    | AP000787.1  | 0.543919413  | 7.90E-43  | postive  |
| GABPB1    | AP000787.1  | 0.437138471  | 1.46E-26  | postive  |
| GABARAPL1 | AP000787.1  | 0.445584147  | 1.19E-27  | postive  |
| LINC00472 | AP000787.1  | 0.68868688   | 5.23E-77  | postive  |
| LPIN1     | AP000787.1  | 0.636850639  | 1.19E-62  | postive  |
| HELLS     | DIRC3       | 0.457998328  | 2.64E-29  | postive  |
| GABPB1    | DIRC3       | 0.442197765  | 3.28E-27  | postive  |
| ATM       | DIRC3       | 0.604753184  | 4.62E-55  | postive  |
| FBXW7     | DIRC3       | 0.46009125   | 1.36E-29  | postive  |
| KLHL24    | HOXB-AS2    | 0.61686648   | 8.01E-58  | postive  |
| IREB2     | HOXB-AS2    | 0.437158347  | 1.45E-26  | postive  |
| PIK3CA    | HOXB-AS2    | 0.505068792  | 3.09E-36  | postive  |
| KRAS      | HOXB-AS2    | 0.432023606  | 6.43E-26  | postive  |
| LINC00472 | HOXB-AS2    | 0.88792824   | 3.02E-183 | postive  |
| LPIN1     | HOXB-AS2    | 0.466298401  | 1.89E-30  | postive  |
| KLHL24    | AC010168.1  | 0.538489165  | 7.44E-42  | postive  |
| IREB2     | AC010168.1  | 0.437682741  | 1.24E-26  | postive  |
| GABPB1    | AC010168.1  | 0.460879355  | 1.06E-29  | postive  |
| PIK3CA    | AC010168.1  | 0.435248978  | 2.53E-26  | postive  |
| LINC00472 | AC010168.1  | 0.834833201  | 2.53E-141 | postive  |
| LPIN1     | AC010168.1  | 0.417725511  | 3.56E-24  | postive  |

|           |            |              |           |          |
|-----------|------------|--------------|-----------|----------|
| ATM       | AC010168.1 | 0.619112631  | 2.39E-58  | postive  |
| ZNF419    | LINC00663  | 0.533920739  | 4.75E-41  | postive  |
| VEGFA     | LINC00663  | 0.418957366  | 2.54E-24  | postive  |
| TUBE1     | LINC00663  | 0.627394061  | 2.54E-60  | postive  |
| SETD1B    | LINC00663  | 0.429529404  | 1.31E-25  | postive  |
| ALOX12    | LINC00663  | 0.597239517  | 2.08E-53  | postive  |
| IREB2     | LINC00663  | 0.410035184  | 2.85E-23  | postive  |
| SP1       | LINC00663  | 0.411408188  | 1.97E-23  | postive  |
| GABPB1    | LINC00663  | 0.417365047  | 3.93E-24  | postive  |
| ULK2      | LINC00663  | 0.413214764  | 1.21E-23  | postive  |
| MAPK8     | LINC00663  | 0.537042018  | 1.34E-41  | postive  |
| LINC00472 | LINC00663  | 0.423306914  | 7.60E-25  | postive  |
| ATM       | LINC00663  | 0.565841623  | 6.04E-47  | postive  |
| ZNF419    | AL031846.2 | 0.546963606  | 2.21E-43  | postive  |
| VEGFA     | AL031846.2 | 0.553757793  | 1.22E-44  | postive  |
| TUBE1     | AL031846.2 | 0.62216729   | 4.54E-59  | postive  |
| SETD1B    | AL031846.2 | 0.57725847   | 3.25E-49  | postive  |
| ALOX12    | AL031846.2 | 0.777347467  | 3.53E-110 | postive  |
| GABPB1    | AL031846.2 | 0.409195069  | 3.57E-23  | postive  |
| MAPK8     | AL031846.2 | 0.411404005  | 1.98E-23  | postive  |
| ATM       | AL031846.2 | 0.599386528  | 7.09E-54  | postive  |
| YY1AP1    | AL031846.2 | 0.465388734  | 2.53E-30  | postive  |
| FBXW7     | AL031846.2 | 0.436453412  | 1.78E-26  | postive  |
| HELLS     | PDC-AS1    | 0.582666997  | 2.54E-50  | postive  |
| ZNF419    | PDC-AS1    | 0.44290075   | 2.66E-27  | postive  |
| TUBE1     | PDC-AS1    | 0.572143065  | 3.46E-48  | postive  |
| ALOX12    | PDC-AS1    | 0.595298089  | 5.49E-53  | postive  |
| GABPB1    | PDC-AS1    | 0.521507231  | 6.37E-39  | postive  |
| ATM       | PDC-AS1    | 0.685895761  | 3.70E-76  | postive  |
| FBXW7     | PDC-AS1    | 0.56736296   | 3.04E-47  | postive  |
| NRAS      | COA6-AS1   | -0.41586881  | 5.91E-24  | negative |
| HRAS      | COA6-AS1   | 0.428692851  | 1.67E-25  | postive  |
| NCOA4     | COA6-AS1   | -0.469593176 | 6.49E-31  | negative |
| PHKG2     | COA6-AS1   | 0.598581303  | 1.06E-53  | postive  |
| MAPK1     | COA6-AS1   | -0.424355205 | 5.67E-25  | negative |
| ANO6      | COA6-AS1   | -0.416118239 | 5.52E-24  | negative |
| TAZ       | COA6-AS1   | 0.623704265  | 1.96E-59  | postive  |
| ATG4D     | AC092171.3 | 0.485443804  | 3.24E-33  | postive  |
| ZNF419    | CHASERR    | 0.43460242   | 3.05E-26  | postive  |
| TUBE1     | CHASERR    | 0.507606024  | 1.22E-36  | postive  |
| GABPB1    | CHASERR    | 0.537443116  | 1.14E-41  | postive  |
| LINC00472 | CHASERR    | 0.452270177  | 1.56E-28  | postive  |
| PML       | AL590764.1 | 0.406506578  | 7.28E-23  | postive  |
| GCH1      | AL590764.1 | 0.456939345  | 3.67E-29  | postive  |
| NCF2      | AL590764.1 | 0.462190288  | 7.02E-30  | postive  |
| SLC2A6    | AL590764.1 | 0.43125528   | 8.02E-26  | postive  |
| CYBB      | AL590764.1 | 0.456715591  | 3.94E-29  | postive  |
| IFNG      | AL590764.1 | 0.622799409  | 3.21E-59  | postive  |
| HSF1      | AP001453.2 | 0.457524845  | 3.06E-29  | postive  |
| G6PD      | AP001453.2 | 0.436233236  | 1.90E-26  | postive  |
| CARS1     | AP001453.2 | 0.411554023  | 1.90E-23  | postive  |
| NCOA4     | AP001453.2 | -0.411633862 | 1.86E-23  | negative |
| PHKG2     | AP001453.2 | 0.601226808  | 2.80E-54  | postive  |
| ULK1      | AP001453.2 | 0.421820778  | 1.15E-24  | postive  |
| MAPK1     | AP001453.2 | -0.419777796 | 2.02E-24  | negative |
| SOCS1     | AP001453.2 | 0.44913909   | 4.06E-28  | postive  |
| PRKAA2    | AP001453.2 | -0.40096617  | 3.10E-22  | negative |
| TAZ       | AP001453.2 | 0.516657073  | 4.09E-38  | postive  |

|           |             |             |           |         |
|-----------|-------------|-------------|-----------|---------|
| HELLS     | AC022973.5  | 0.539768195 | 4.40E-42  | postive |
| ZNF419    | AC022973.5  | 0.466114937 | 2.00E-30  | postive |
| TUBE1     | AC022973.5  | 0.523477794 | 2.97E-39  | postive |
| ALOX12    | AC022973.5  | 0.531124711 | 1.46E-40  | postive |
| GABPB1    | AC022973.5  | 0.545670144 | 3.80E-43  | postive |
| LINC00472 | AC022973.5  | 0.576130584 | 5.49E-49  | postive |
| ATM       | AC022973.5  | 0.627331726 | 2.63E-60  | postive |
| FBXW7     | AC022973.5  | 0.495991782 | 8.16E-35  | postive |
| FH        | ZNF710-AS1  | 0.466531231 | 1.75E-30  | postive |
| ISCU      | ZNF710-AS1  | 0.525838904 | 1.18E-39  | postive |
| GPT2      | ZNF710-AS1  | 0.432655097 | 5.36E-26  | postive |
| SLC2A12   | ZNF710-AS1  | 0.506583639 | 1.77E-36  | postive |
| CS        | ZNF710-AS1  | 0.484367224 | 4.69E-33  | postive |
| GOT1      | ZNF710-AS1  | 0.444374801 | 1.71E-27  | postive |
| ATG4D     | ZNF710-AS1  | 0.568147878 | 2.14E-47  | postive |
| GABARAPL1 | ZNF710-AS1  | 0.57868923  | 1.66E-49  | postive |
| WIP1      | ZNF710-AS1  | 0.506717828 | 1.69E-36  | postive |
| LPIN1     | ZNF710-AS1  | 0.443943851 | 1.95E-27  | postive |
| KLHL24    | AC009237.15 | 0.455078065 | 6.55E-29  | postive |
| LINC00472 | AC009237.15 | 0.648345966 | 1.36E-65  | postive |
| ZNF419    | AC009113.1  | 0.437681345 | 1.24E-26  | postive |
| VEGFA     | AC009113.1  | 0.439097354 | 8.21E-27  | postive |
| TUBE1     | AC009113.1  | 0.494729688 | 1.28E-34  | postive |
| ALOX12    | AC009113.1  | 0.53204447  | 1.01E-40  | postive |
| TAZ       | AC009113.1  | 0.409366933 | 3.41E-23  | postive |
| HELLS     | AC002563.1  | 0.405993108 | 8.33E-23  | postive |
| TUBE1     | AC002563.1  | 0.579787442 | 9.93E-50  | postive |
| ALOX12    | AC002563.1  | 0.555379837 | 6.08E-45  | postive |
| ATM       | AC002563.1  | 0.521079464 | 7.52E-39  | postive |
| BRD4      | TMEM147-AS1 | 0.461004799 | 1.02E-29  | postive |
| ZNF419    | TMEM147-AS1 | 0.577803632 | 2.52E-49  | postive |
| TUBE1     | TMEM147-AS1 | 0.466803679 | 1.60E-30  | postive |
| SETD1B    | TMEM147-AS1 | 0.434793234 | 2.89E-26  | postive |
| ALOX12    | TMEM147-AS1 | 0.556612042 | 3.56E-45  | postive |
| PHKG2     | TMEM147-AS1 | 0.606693958 | 1.70E-55  | postive |
| ULK1      | TMEM147-AS1 | 0.420731812 | 1.56E-24  | postive |
| TAZ       | TMEM147-AS1 | 0.715259525 | 1.31E-85  | postive |
| HELLS     | AF117829.1  | 0.549266766 | 8.34E-44  | postive |
| ZNF419    | AF117829.1  | 0.40865624  | 4.12E-23  | postive |
| KLHL24    | AF117829.1  | 0.487247944 | 1.74E-33  | postive |
| TUBE1     | AF117829.1  | 0.467248244 | 1.39E-30  | postive |
| ALOX12    | AF117829.1  | 0.402954809 | 1.85E-22  | postive |
| GABPB1    | AF117829.1  | 0.603830737 | 7.42E-55  | postive |
| PIK3CA    | AF117829.1  | 0.427571911 | 2.29E-25  | postive |
| ATG7      | AF117829.1  | 0.444566098 | 1.62E-27  | postive |
| LINC00472 | AF117829.1  | 0.824477721 | 6.90E-135 | postive |
| ATM       | AF117829.1  | 0.717783555 | 1.78E-86  | postive |
| FBXW7     | AF117829.1  | 0.541793157 | 1.91E-42  | postive |
| ACO1      | AC009275.1  | 0.42539659  | 4.23E-25  | postive |
| IDH1      | AC009275.1  | 0.513583189 | 1.31E-37  | postive |
| HELLS     | AC025569.1  | 0.556703864 | 3.42E-45  | postive |
| ZNF419    | AC025569.1  | 0.51392148  | 1.15E-37  | postive |
| TUBE1     | AC025569.1  | 0.531216184 | 1.41E-40  | postive |
| ALOX12    | AC025569.1  | 0.537580783 | 1.08E-41  | postive |
| GABPB1    | AC025569.1  | 0.6162817   | 1.10E-57  | postive |
| ZEB1      | AC025569.1  | 0.435477081 | 2.37E-26  | postive |
| MAPK8     | AC025569.1  | 0.458221246 | 2.46E-29  | postive |
| LINC00472 | AC025569.1  | 0.586443619 | 4.17E-51  | postive |

|           |            |              |          |          |
|-----------|------------|--------------|----------|----------|
| ATM       | AC025569.1 | 0.704981734  | 3.62E-82 | postive  |
| FBXW7     | AC025569.1 | 0.558187625  | 1.79E-45 | postive  |
| STEAP3    | AC018695.6 | 0.439543325  | 7.20E-27 | postive  |
| PHKG2     | AC018695.6 | 0.442979686  | 2.60E-27 | postive  |
| GOT1      | AC116345.3 | 0.422405601  | 9.77E-25 | postive  |
| ATG4D     | AC116345.3 | 0.467000426  | 1.50E-30 | postive  |
| MIOX      | AC116345.3 | 0.409192516  | 3.57E-23 | postive  |
| GPX4      | AL355353.1 | 0.43333274   | 4.41E-26 | postive  |
| HSPB1     | AL355353.1 | 0.409525118  | 3.27E-23 | postive  |
| HBA1      | AL355353.1 | 0.436725851  | 1.65E-26 | postive  |
| HRAS      | AL355353.1 | 0.684883284  | 7.48E-76 | postive  |
| PHKG2     | AL355353.1 | 0.44082845   | 4.93E-27 | postive  |
| MAP1LC3A  | AL355353.1 | 0.400808412  | 3.23E-22 | postive  |
| PEBP1     | AL355353.1 | 0.41151264   | 1.92E-23 | postive  |
| EGLN2     | AL355353.1 | 0.626776368  | 3.58E-60 | postive  |
| TAZ       | AL355353.1 | 0.465519644  | 2.42E-30 | postive  |
| FANCD2    | AC116914.2 | 0.47743422   | 4.89E-32 | postive  |
| ZNF419    | AC116914.2 | 0.436580311  | 1.72E-26 | postive  |
| ALOX12    | AC116914.2 | 0.590289644  | 6.47E-52 | postive  |
| TAZ       | AC116914.2 | 0.469555771  | 6.57E-31 | postive  |
| ALOX12    | AC129507.3 | 0.487369495  | 1.67E-33 | postive  |
| ZNF419    | AL513534.2 | 0.41850107   | 2.88E-24 | postive  |
| GABPB1    | AL513534.2 | 0.4790504    | 2.84E-32 | postive  |
| ZEB1      | AL513534.2 | 0.45412707   | 8.80E-29 | postive  |
| FBXW7     | AL513534.2 | 0.431709963  | 7.03E-26 | postive  |
| HSPB1     | DLG5-AS1   | 0.425871007  | 3.70E-25 | postive  |
| HRAS      | DLG5-AS1   | 0.437166323  | 1.45E-26 | postive  |
| MAP1LC3A  | DLG5-AS1   | 0.436287579  | 1.87E-26 | postive  |
| MAPK1     | DLG5-AS1   | -0.424433493 | 5.55E-25 | negative |
| EGLN2     | DLG5-AS1   | 0.487950903  | 1.37E-33 | postive  |
| NCF2      | AC006033.2 | 0.518414988  | 2.09E-38 | postive  |
| CYBB      | AC006033.2 | 0.576542696  | 4.54E-49 | postive  |
| IFNG      | AC006033.2 | 0.417046877  | 4.29E-24 | postive  |
| HELLS     | SP2-AS1    | 0.467413726  | 1.32E-30 | postive  |
| IREB2     | SP2-AS1    | 0.421572216  | 1.23E-24 | postive  |
| PIK3CA    | SP2-AS1    | 0.411266263  | 2.05E-23 | postive  |
| ATG7      | SP2-AS1    | 0.448408641  | 5.08E-28 | postive  |
| MAPK8     | SP2-AS1    | 0.400458353  | 3.53E-22 | postive  |
| LINC00472 | SP2-AS1    | 0.472672671  | 2.37E-31 | postive  |
| ATM       | SP2-AS1    | 0.633957443  | 6.26E-62 | postive  |
| BACH1     | SP2-AS1    | 0.420097554  | 1.85E-24 | postive  |
| BRD4      | AC245052.4 | 0.410146968  | 2.77E-23 | postive  |
| ZNF419    | AC245052.4 | 0.564146866  | 1.29E-46 | postive  |
| VEGFA     | AC245052.4 | 0.555069787  | 6.95E-45 | postive  |
| TUBE1     | AC245052.4 | 0.568677282  | 1.68E-47 | postive  |
| SETD1B    | AC245052.4 | 0.481458545  | 1.26E-32 | postive  |
| DRD4      | AC245052.4 | 0.431035627  | 8.54E-26 | postive  |
| ALOX12    | AC245052.4 | 0.68204256   | 5.31E-75 | postive  |
| PHKG2     | AC245052.4 | 0.448387605  | 5.11E-28 | postive  |
| TAZ       | AC245052.4 | 0.662024979  | 2.89E-69 | postive  |
| FBXW7     | AC245052.4 | 0.431804766  | 6.85E-26 | postive  |
| TUBE1     | AC020634.2 | 0.42682115   | 2.83E-25 | postive  |
| GABPB1    | AC020634.2 | 0.515840834  | 5.58E-38 | postive  |
| ATM       | AC020634.2 | 0.49622895   | 7.50E-35 | postive  |
| FBXW7     | AC020634.2 | 0.410862466  | 2.29E-23 | postive  |
| HELLS     | AC138150.1 | 0.538216004  | 8.31E-42 | postive  |
| TUBE1     | AC138150.1 | 0.521176972  | 7.24E-39 | postive  |
| ALOX12    | AC138150.1 | 0.507327478  | 1.35E-36 | postive  |

|           |            |              |          |          |
|-----------|------------|--------------|----------|----------|
| IREB2     | AC138150.1 | 0.410968327  | 2.22E-23 | postive  |
| GABPB1    | AC138150.1 | 0.571620107  | 4.40E-48 | postive  |
| ATG7      | AC138150.1 | 0.427347359  | 2.44E-25 | postive  |
| MAPK8     | AC138150.1 | 0.422434679  | 9.69E-25 | postive  |
| LINC00472 | AC138150.1 | 0.696849747  | 1.50E-79 | postive  |
| ATM       | AC138150.1 | 0.740348153  | 1.10E-94 | postive  |
| FBXW7     | AC138150.1 | 0.459361736  | 1.72E-29 | postive  |
| ZNF419    | AC104463.2 | 0.439947174  | 6.39E-27 | postive  |
| ALOX12    | AC104463.2 | 0.481111142  | 1.42E-32 | postive  |
| HBA1      | AC104463.2 | 0.435934284  | 2.07E-26 | postive  |
| TAZ       | AC104463.2 | 0.486952463  | 1.93E-33 | postive  |
| GCLC      | AL137003.1 | 0.409600237  | 3.20E-23 | postive  |
| KLHL24    | AL137003.1 | 0.411449467  | 1.95E-23 | postive  |
| TUBE1     | AL137003.1 | 0.5907857    | 5.07E-52 | postive  |
| IREB2     | AL137003.1 | 0.50495227   | 3.23E-36 | postive  |
| SP1       | AL137003.1 | 0.408997185  | 3.76E-23 | postive  |
| GABPB1    | AL137003.1 | 0.449425166  | 3.73E-28 | postive  |
| EMC2      | AL137003.1 | 0.413102659  | 1.25E-23 | postive  |
| PIK3CA    | AL137003.1 | 0.421526629  | 1.25E-24 | postive  |
| KRAS      | AL137003.1 | 0.481376773  | 1.30E-32 | postive  |
| MAPK8     | AL137003.1 | 0.559903833  | 8.44E-46 | postive  |
| LINC00472 | AL137003.1 | 0.487713563  | 1.48E-33 | postive  |
| PRKAA2    | AL137003.1 | 0.480088503  | 2.00E-32 | postive  |
| PRKAA1    | AL137003.1 | 0.510677623  | 3.89E-37 | postive  |
| ATM       | AL137003.1 | 0.554653471  | 8.32E-45 | postive  |
| SIRT1     | AL137003.1 | 0.413434755  | 1.14E-23 | postive  |
| RB1       | EBLN3P     | 0.433706095  | 3.96E-26 | postive  |
| HSPB1     | EBLN3P     | -0.442557791 | 2.95E-27 | negative |
| GCLC      | EBLN3P     | 0.49579347   | 8.76E-35 | postive  |
| ACSL3     | EBLN3P     | 0.512688281  | 1.83E-37 | postive  |
| CHMP5     | EBLN3P     | 0.525016778  | 1.63E-39 | postive  |
| OXSRI     | EBLN3P     | 0.469088824  | 7.65E-31 | postive  |
| KLHL24    | EBLN3P     | 0.620108578  | 1.39E-58 | postive  |
| TUBE1     | EBLN3P     | 0.466518335  | 1.76E-30 | postive  |
| EIF2S1    | EBLN3P     | 0.432125023  | 6.24E-26 | postive  |
| MAP3K5    | EBLN3P     | 0.483383705  | 6.56E-33 | postive  |
| IREB2     | EBLN3P     | 0.697374785  | 1.03E-79 | postive  |
| HMGB1     | EBLN3P     | 0.419862719  | 1.98E-24 | postive  |
| GABPB1    | EBLN3P     | 0.440293461  | 5.77E-27 | postive  |
| EMC2      | EBLN3P     | 0.598564236  | 1.07E-53 | postive  |
| PIK3CA    | EBLN3P     | 0.599492308  | 6.73E-54 | postive  |
| KRAS      | EBLN3P     | 0.66703812   | 1.17E-70 | postive  |
| ATG5      | EBLN3P     | 0.415919713  | 5.83E-24 | postive  |
| MAPK1     | EBLN3P     | 0.40369342   | 1.52E-22 | postive  |
| MAPK8     | EBLN3P     | 0.641022532  | 1.05E-63 | postive  |
| LINC00472 | EBLN3P     | 0.463259312  | 5.00E-30 | postive  |
| PRKAA2    | EBLN3P     | 0.558851735  | 1.34E-45 | postive  |
| PRKAA1    | EBLN3P     | 0.682588715  | 3.65E-75 | postive  |
| TLR4      | EBLN3P     | 0.423936174  | 6.37E-25 | postive  |
| ATM       | EBLN3P     | 0.510669293  | 3.90E-37 | postive  |
| SIRT1     | EBLN3P     | 0.556312287  | 4.05E-45 | postive  |
| HELLS     | CRTC3-AS1  | 0.564695651  | 1.01E-46 | postive  |
| ALOX12    | CRTC3-AS1  | 0.413869673  | 1.02E-23 | postive  |
| GABPB1    | CRTC3-AS1  | 0.481958319  | 1.07E-32 | postive  |
| ATM       | CRTC3-AS1  | 0.617322953  | 6.27E-58 | postive  |
| FBXW7     | CRTC3-AS1  | 0.578954611  | 1.47E-49 | postive  |
| ZNF419    | AC087741.1 | 0.463116928  | 5.23E-30 | postive  |
| TUBE1     | AC087741.1 | 0.515144045  | 7.27E-38 | postive  |

|           |            |             |           |          |
|-----------|------------|-------------|-----------|----------|
| DRD4      | AC087741.1 | 0.417650848 | 3.63E-24  | postive  |
| ALOX12    | AC087741.1 | 0.613016557 | 6.23E-57  | postive  |
| PHKG2     | AC087741.1 | 0.603154694 | 1.05E-54  | postive  |
| TAZ       | AC087741.1 | 0.760716726 | 7.25E-103 | postive  |
| TFAP2C    | AC006238.1 | 0.60685634  | 1.56E-55  | postive  |
| HBA1      | AC006238.1 | 0.495687625 | 9.09E-35  | postive  |
| ALOX12    | AL162595.1 | 0.419229021 | 2.36E-24  | postive  |
| ULK2      | AL162595.1 | 0.446208462 | 9.87E-28  | postive  |
| ATM       | AL162595.1 | 0.528262963 | 4.54E-40  | postive  |
| YY1AP1    | AL162595.1 | 0.443971598 | 1.93E-27  | postive  |
| SLC1A4    | AL136084.2 | 0.484370647 | 4.69E-33  | postive  |
| IL33      | AL136084.2 | 0.400447433 | 3.54E-22  | postive  |
| ZEB1      | AL136084.2 | 0.604224165 | 6.07E-55  | postive  |
| EPAS1     | AL136084.2 | 0.552575079 | 2.03E-44  | postive  |
| CD44      | AL390719.2 | 0.420007818 | 1.90E-24  | postive  |
| SOCS1     | AL390719.2 | 0.66833795  | 5.02E-71  | postive  |
| PLIN2     | AC087482.1 | 0.467517863 | 1.27E-30  | postive  |
| HELLS     | WASHC5-AS  | 0.526749612 | 8.25E-40  | postive  |
| ZNF419    | WASHC5-AS  | 0.425367782 | 4.27E-25  | postive  |
| TUBE1     | WASHC5-AS  | 0.534953792 | 3.13E-41  | postive  |
| ALOX12    | WASHC5-AS  | 0.522285281 | 4.72E-39  | postive  |
| GABPB1    | WASHC5-AS  | 0.588863996 | 1.29E-51  | postive  |
| MAPK8     | WASHC5-AS  | 0.434984844 | 2.73E-26  | postive  |
| LINC00472 | WASHC5-AS  | 0.75955662  | 2.23E-102 | postive  |
| ATM       | WASHC5-AS  | 0.750602763 | 1.05E-98  | postive  |
| FBXW7     | WASHC5-AS  | 0.507869782 | 1.10E-36  | postive  |
| HRAS      | AL139246.5 | 0.544105883 | 7.31E-43  | postive  |
| EGLN2     | AL139246.5 | 0.440333516 | 5.70E-27  | postive  |
| ISCU      | AC091151.1 | 0.41947923  | 2.20E-24  | postive  |
| ACSL3     | AC091151.1 | 0.407958352 | 4.96E-23  | postive  |
| KLHL24    | AC091151.1 | 0.603275584 | 9.86E-55  | postive  |
| PIK3CA    | AC091151.1 | 0.403500287 | 1.60E-22  | postive  |
| GABARAPL1 | AC091151.1 | 0.471079016 | 4.00E-31  | postive  |
| LINC00472 | AC091151.1 | 0.677616803 | 1.08E-73  | postive  |
| LPIN1     | AC091151.1 | 0.539366568 | 5.19E-42  | postive  |
| PHKG2     | AC026471.2 | 0.462692134 | 5.98E-30  | postive  |
| TAZ       | AC026471.2 | 0.535566005 | 2.44E-41  | postive  |
| DRD4      | AC040977.1 | 0.401001377 | 3.07E-22  | postive  |
| ALOX12    | AC040977.1 | 0.573408605 | 1.94E-48  | postive  |
| NOX1      | AC040977.1 | 0.405537386 | 9.39E-23  | postive  |
| ALOX12B   | AC040977.1 | 0.430252659 | 1.07E-25  | postive  |
| PHKG2     | AC040977.1 | 0.405353223 | 9.86E-23  | postive  |
| TAZ       | AC040977.1 | 0.493628119 | 1.88E-34  | postive  |
| MTDH      | AC040977.1 | -0.40458697 | 1.21E-22  | negative |
| TFAP2C    | AC079414.3 | 0.534219911 | 4.21E-41  | postive  |
| HBA1      | AC079414.3 | 0.421883672 | 1.13E-24  | postive  |
| BRD4      | AC022098.1 | 0.511547282 | 2.81E-37  | postive  |
| ZNF419    | AC022098.1 | 0.604066264 | 6.58E-55  | postive  |
| VEGFA     | AC022098.1 | 0.553748907 | 1.23E-44  | postive  |
| TUBE1     | AC022098.1 | 0.463212958 | 5.07E-30  | postive  |
| SETD1B    | AC022098.1 | 0.555070401 | 6.95E-45  | postive  |
| ALOX12    | AC022098.1 | 0.597358697 | 1.96E-53  | postive  |
| GABPB1    | AC022098.1 | 0.468326594 | 9.79E-31  | postive  |
| ZEB1      | AC022098.1 | 0.413911098 | 1.01E-23  | postive  |
| YY1AP1    | AC022098.1 | 0.41158862  | 1.88E-23  | postive  |
| TAZ       | AC022098.1 | 0.457251735 | 3.33E-29  | postive  |
| FBXW7     | AC022098.1 | 0.435528746 | 2.33E-26  | postive  |
| TXNIP     | LINC00909  | 0.432639464 | 5.38E-26  | postive  |



|           |            |              |           |          |
|-----------|------------|--------------|-----------|----------|
| ZNF419    | LINC00909  | 0.429732381  | 1.24E-25  | postive  |
| TUBE1     | LINC00909  | 0.462984395  | 5.45E-30  | postive  |
| ALOX12    | LINC00909  | 0.44254083   | 2.96E-27  | postive  |
| IREB2     | LINC00909  | 0.408951289  | 3.81E-23  | postive  |
| HMGB1     | LINC00909  | 0.445218308  | 1.33E-27  | postive  |
| GABPB1    | LINC00909  | 0.478594916  | 3.31E-32  | postive  |
| ULK2      | LINC00909  | 0.441405461  | 4.15E-27  | postive  |
| MAPK8     | LINC00909  | 0.510812787  | 3.70E-37  | postive  |
| ATM       | LINC00909  | 0.477216006  | 5.26E-32  | postive  |
| YY1AP1    | LINC00909  | 0.414184364  | 9.34E-24  | postive  |
| SIRT1     | LINC00909  | 0.41851256   | 2.87E-24  | postive  |
| TFAP2C    | AC079210.1 | 0.479547786  | 2.41E-32  | postive  |
| EIF2AK4   | PANTR1     | -0.402454552 | 2.10E-22  | negative |
| HRAS      | PANTR1     | 0.42743184   | 2.38E-25  | postive  |
| KLHL24    | ITFG1-AS1  | 0.601982258  | 1.91E-54  | postive  |
| IREB2     | ITFG1-AS1  | 0.405551927  | 9.36E-23  | postive  |
| GABPB1    | ITFG1-AS1  | 0.414080272  | 9.61E-24  | postive  |
| PIK3CA    | ITFG1-AS1  | 0.449373236  | 3.79E-28  | postive  |
| KRAS      | ITFG1-AS1  | 0.413123902  | 1.24E-23  | postive  |
| LINC00472 | ITFG1-AS1  | 0.812684174  | 4.70E-128 | postive  |
| PRKAA1    | ITFG1-AS1  | 0.417401396  | 3.89E-24  | postive  |
| LPIN1     | ITFG1-AS1  | 0.496340613  | 7.21E-35  | postive  |
| ATM       | ITFG1-AS1  | 0.442738872  | 2.79E-27  | postive  |
| BRD4      | PTOV1-AS2  | 0.460044052  | 1.39E-29  | postive  |
| ZNF419    | PTOV1-AS2  | 0.553774406  | 1.22E-44  | postive  |
| VEGFA     | PTOV1-AS2  | 0.513109752  | 1.57E-37  | postive  |
| TUBE1     | PTOV1-AS2  | 0.500428569  | 1.67E-35  | postive  |
| SETD1B    | PTOV1-AS2  | 0.525016324  | 1.63E-39  | postive  |
| DRD4      | PTOV1-AS2  | 0.467452931  | 1.30E-30  | postive  |
| ALOX12    | PTOV1-AS2  | 0.582615577  | 2.61E-50  | postive  |
| NCOA4     | PTOV1-AS2  | -0.418333293 | 3.01E-24  | negative |
| PHKG2     | PTOV1-AS2  | 0.619522213  | 1.92E-58  | postive  |
| ULK1      | PTOV1-AS2  | 0.405313105  | 9.96E-23  | postive  |
| TAZ       | PTOV1-AS2  | 0.806269209  | 1.54E-124 | postive  |
| ZNF419    | AL359504.1 | 0.490552005  | 5.54E-34  | postive  |
| VEGFA     | AL359504.1 | 0.477762843  | 4.38E-32  | postive  |
| TUBE1     | AL359504.1 | 0.545048626  | 4.93E-43  | postive  |
| ALOX12    | AL359504.1 | 0.562748227  | 2.40E-46  | postive  |
| PHKG2     | AL359504.1 | 0.483969871  | 5.37E-33  | postive  |
| TAZ       | AL359504.1 | 0.716582061  | 4.62E-86  | postive  |
| ZNF419    | AL390728.5 | 0.435075012  | 2.66E-26  | postive  |
| TUBE1     | AL390728.5 | 0.566263729  | 4.99E-47  | postive  |
| NOX1      | AL390728.5 | 0.463217733  | 5.06E-30  | postive  |
| PHKG2     | AL390728.5 | 0.549752763  | 6.79E-44  | postive  |
| TAZ       | AL390728.5 | 0.664067274  | 7.88E-70  | postive  |
| FBXW7     | AL390728.5 | 0.403053811  | 1.80E-22  | postive  |
| HELLS     | AC079313.1 | 0.414301632  | 9.05E-24  | postive  |
| ALOX12    | AC079313.1 | 0.436305245  | 1.86E-26  | postive  |
| TFAP2C    | AC079313.1 | 0.488965146  | 9.63E-34  | postive  |
| HBA1      | AC079313.1 | 0.460117589  | 1.35E-29  | postive  |
| DUOX1     | AC079313.1 | 0.416909972  | 4.45E-24  | postive  |
| ISCU      | MAN2A1-DT  | 0.565814547  | 6.11E-47  | postive  |
| KLHL24    | MAN2A1-DT  | 0.417478005  | 3.81E-24  | postive  |
| MAP1LC3A  | MAN2A1-DT  | 0.45638703   | 4.36E-29  | postive  |
| GABARAPL1 | MAN2A1-DT  | 0.537835628  | 9.71E-42  | postive  |
| LPIN1     | MAN2A1-DT  | 0.444354027  | 1.72E-27  | postive  |
| ZNF419    | AC007663.4 | 0.54329574   | 1.02E-42  | postive  |
| VEGFA     | AC007663.4 | 0.430782388  | 9.18E-26  | postive  |

|           |            |              |           |          |
|-----------|------------|--------------|-----------|----------|
| TUBE1     | AC007663.4 | 0.561208188  | 4.75E-46  | postive  |
| SETD1B    | AC007663.4 | 0.469372644  | 6.97E-31  | postive  |
| ALOX12    | AC007663.4 | 0.562554684  | 2.62E-46  | postive  |
| GABPB1    | AC007663.4 | 0.541529616  | 2.13E-42  | postive  |
| MAPK8     | AC007663.4 | 0.475580809  | 9.06E-32  | postive  |
| LINC00472 | AC007663.4 | 0.618599484  | 3.15E-58  | postive  |
| ATM       | AC007663.4 | 0.557631848  | 2.28E-45  | postive  |
| YY1AP1    | AC007663.4 | 0.421700061  | 1.19E-24  | postive  |
| FBXW7     | AC007663.4 | 0.41629261   | 5.27E-24  | postive  |
| KLHL24    | AC064801.1 | 0.481904375  | 1.09E-32  | postive  |
| GABPB1    | AC064801.1 | 0.498380169  | 3.48E-35  | postive  |
| LINC00472 | AC064801.1 | 0.860483504  | 2.13E-159 | postive  |
| ATM       | AC064801.1 | 0.523676552  | 2.75E-39  | postive  |
| HELLS     | PVT1       | 0.434080483  | 3.55E-26  | postive  |
| PHKG2     | PVT1       | 0.439395146  | 7.52E-27  | postive  |
| TAZ       | PVT1       | 0.522479739  | 4.37E-39  | postive  |
| ALOX12    | FAM160A1-[ | 0.423677599  | 6.85E-25  | postive  |
| ATM       | FAM160A1-[ | 0.406879221  | 6.59E-23  | postive  |
| ALOX12    | AL031722.1 | 0.403787546  | 1.49E-22  | postive  |
| TFAP2C    | AL031722.1 | 0.472231302  | 2.74E-31  | postive  |
| HBA1      | AL031722.1 | 0.427057219  | 2.65E-25  | postive  |
| HSPB1     | HHLA3      | 0.440093469  | 6.12E-27  | postive  |
| IREB2     | HHLA3      | -0.488167902 | 1.27E-33  | negative |
| PIK3CA    | HHLA3      | -0.458122553 | 2.53E-29  | negative |
| KRAS      | HHLA3      | -0.414533377 | 8.50E-24  | negative |
| NCOA4     | HHLA3      | -0.409645687 | 3.16E-23  | negative |
| PHKG2     | HHLA3      | 0.407005612  | 6.38E-23  | postive  |
| PRKAA1    | HHLA3      | -0.491603997 | 3.84E-34  | negative |
| GABPB1    | AC099811.3 | 0.428388469  | 1.82E-25  | postive  |
| ZNF419    | AP006621.2 | 0.582178927  | 3.21E-50  | postive  |
| VEGFA     | AP006621.2 | 0.431601462  | 7.26E-26  | postive  |
| TUBE1     | AP006621.2 | 0.558171498  | 1.80E-45  | postive  |
| SETD1B    | AP006621.2 | 0.442637669  | 2.88E-27  | postive  |
| ALOX12    | AP006621.2 | 0.723956775  | 1.22E-88  | postive  |
| ATM       | AP006621.2 | 0.490763723  | 5.15E-34  | postive  |
| TAZ       | AP006621.2 | 0.530883678  | 1.61E-40  | postive  |
| FBXW7     | AP006621.2 | 0.400318198  | 3.66E-22  | postive  |
| ZNF419    | AC093752.2 | 0.423685887  | 6.84E-25  | postive  |
| VEGFA     | AC093752.2 | 0.499363345  | 2.45E-35  | postive  |
| TUBE1     | AC093752.2 | 0.49208459   | 3.24E-34  | postive  |
| SETD1B    | AC093752.2 | 0.535597715  | 2.41E-41  | postive  |
| ALOX12    | AC093752.2 | 0.618135549  | 4.05E-58  | postive  |
| TAZ       | AC093752.2 | 0.49123976   | 4.36E-34  | postive  |
| CXCL2     | AC245128.3 | 0.401734954  | 2.54E-22  | postive  |
| ISCU      | LINC01607  | 0.468150669  | 1.04E-30  | postive  |
| ATG4D     | LINC01607  | 0.434608509  | 3.05E-26  | postive  |
| GABARAPL2 | LINC01607  | 0.564645609  | 1.03E-46  | postive  |
| CDKN2A    | AC124067.2 | 0.416047936  | 5.63E-24  | postive  |
| HELLS     | COL18A1-AS | 0.488190983  | 1.26E-33  | postive  |
| ALOX12    | COL18A1-AS | 0.420226591  | 1.79E-24  | postive  |
| GABPB1    | COL18A1-AS | 0.507967267  | 1.06E-36  | postive  |
| ATG7      | COL18A1-AS | 0.406959382  | 6.46E-23  | postive  |
| LINC00472 | COL18A1-AS | 0.642050621  | 5.76E-64  | postive  |
| ATM       | COL18A1-AS | 0.681783905  | 6.34E-75  | postive  |
| FBXW7     | COL18A1-AS | 0.408438856  | 4.36E-23  | postive  |
| ZNF419    | LINC01004  | 0.545594569  | 3.92E-43  | postive  |
| TUBE1     | LINC01004  | 0.58598136   | 5.21E-51  | postive  |
| ALOX12    | LINC01004  | 0.457144348  | 3.44E-29  | postive  |

|           |            |              |          |         |
|-----------|------------|--------------|----------|---------|
| GABPB1    | LINC01004  | 0.444079719  | 1.87E-27 | postive |
| PHKG2     | LINC01004  | 0.50588118   | 2.30E-36 | postive |
| LINC00472 | LINC01004  | 0.587147865  | 2.97E-51 | postive |
| TAZ       | LINC01004  | 0.562749219  | 2.40E-46 | postive |
| PHKG2     | NALT1      | 0.602791972  | 1.26E-54 | postive |
| TAZ       | NALT1      | 0.613334505  | 5.26E-57 | postive |
| JDP2      | AC004816.2 | 0.597481608  | 1.85E-53 | postive |
| RGS4      | AC004816.2 | 0.42326121   | 7.70E-25 | postive |
| EIF2S1    | AC004816.2 | 0.445172995  | 1.35E-27 | postive |
| TFAP2C    | AC027307.3 | 0.449491444  | 3.65E-28 | postive |
| STEAP3    | AL391095.2 | 0.467746883  | 1.18E-30 | postive |
| HELLS     | AC004477.2 | 0.428155257  | 1.94E-25 | postive |
| TFAP2C    | AC004477.2 | 0.402942001  | 1.85E-22 | postive |
| ARNTL     | SEPTIN7-DT | 0.434052967  | 3.58E-26 | postive |
| VEGFA     | SEPTIN7-DT | 0.45080908   | 2.44E-28 | postive |
| TUBE1     | SEPTIN7-DT | 0.546131806  | 3.13E-43 | postive |
| ALOX12    | SEPTIN7-DT | 0.504980282  | 3.19E-36 | postive |
| IREB2     | SEPTIN7-DT | 0.532834681  | 7.35E-41 | postive |
| SP1       | SEPTIN7-DT | 0.402876681  | 1.89E-22 | postive |
| GABPB1    | SEPTIN7-DT | 0.41124634   | 2.06E-23 | postive |
| MAPK8     | SEPTIN7-DT | 0.646744706  | 3.56E-65 | postive |
| PRKAA2    | SEPTIN7-DT | 0.5123019    | 2.12E-37 | postive |
| PRKAA1    | SEPTIN7-DT | 0.457367095  | 3.21E-29 | postive |
| ATM       | SEPTIN7-DT | 0.699158487  | 2.77E-80 | postive |
| SIRT1     | SEPTIN7-DT | 0.518500825  | 2.03E-38 | postive |
| TFAP2C    | AC009119.1 | 0.560154756  | 7.56E-46 | postive |
| HBA1      | AC009119.1 | 0.515280707  | 6.90E-38 | postive |
| ACSL3     | AL078581.2 | 0.454776543  | 7.19E-29 | postive |
| KLHL24    | AL078581.2 | 0.521255483  | 7.03E-39 | postive |
| IREB2     | AL078581.2 | 0.52003278   | 1.13E-38 | postive |
| PIK3CA    | AL078581.2 | 0.494785295  | 1.25E-34 | postive |
| KRAS      | AL078581.2 | 0.425352583  | 4.28E-25 | postive |
| LINC00472 | AL078581.2 | 0.568402747  | 1.90E-47 | postive |
| LPIN1     | AL078581.2 | 0.430877979  | 8.93E-26 | postive |
| HELLS     | FBXO30-DT  | 0.468483845  | 9.31E-31 | postive |
| MTOR      | FBXO30-DT  | 0.4171110934 | 4.21E-24 | postive |
| KLHL24    | FBXO30-DT  | 0.508550065  | 8.58E-37 | postive |
| TUBE1     | FBXO30-DT  | 0.48783343   | 1.42E-33 | postive |
| MAP3K5    | FBXO30-DT  | 0.501201904  | 1.26E-35 | postive |
| IREB2     | FBXO30-DT  | 0.55476703   | 7.92E-45 | postive |
| GABPB1    | FBXO30-DT  | 0.525986843  | 1.11E-39 | postive |
| PIK3CA    | FBXO30-DT  | 0.505378122  | 2.76E-36 | postive |
| ATG5      | FBXO30-DT  | 0.420014422  | 1.90E-24 | postive |
| ATG7      | FBXO30-DT  | 0.470116131  | 5.47E-31 | postive |
| MAPK8     | FBXO30-DT  | 0.515803043  | 5.66E-38 | postive |
| LINC00472 | FBXO30-DT  | 0.644535998  | 1.33E-64 | postive |
| PRKAA2    | FBXO30-DT  | 0.507208022  | 1.41E-36 | postive |
| PRKAA1    | FBXO30-DT  | 0.446888457  | 8.04E-28 | postive |
| TLR4      | FBXO30-DT  | 0.41295047   | 1.30E-23 | postive |
| ATM       | FBXO30-DT  | 0.73654403   | 3.05E-93 | postive |
| FBXW7     | FBXO30-DT  | 0.464875943  | 2.98E-30 | postive |
| BACH1     | FBXO30-DT  | 0.402272289  | 2.21E-22 | postive |
| HELLS     | XPC-AS1    | 0.497126343  | 5.45E-35 | postive |
| ZNF419    | XPC-AS1    | 0.574300641  | 1.28E-48 | postive |
| VEGFA     | XPC-AS1    | 0.410647221  | 2.42E-23 | postive |
| TUBE1     | XPC-AS1    | 0.663682354  | 1.01E-69 | postive |
| SETD1B    | XPC-AS1    | 0.490783942  | 5.11E-34 | postive |
| ALOX12    | XPC-AS1    | 0.714295672  | 2.80E-85 | postive |

|           |            |             |           |         |
|-----------|------------|-------------|-----------|---------|
| GABPB1    | XPC-AS1    | 0.582955824 | 2.22E-50  | postive |
| MAPK8     | XPC-AS1    | 0.43014812  | 1.10E-25  | postive |
| LINC00472 | XPC-AS1    | 0.621680098 | 5.93E-59  | postive |
| ATM       | XPC-AS1    | 0.706165203 | 1.48E-82  | postive |
| FBXW7     | XPC-AS1    | 0.539109696 | 5.77E-42  | postive |
| FANCD2    | CCDC18-AS1 | 0.403297529 | 1.69E-22  | postive |
| HELLS     | CCDC18-AS1 | 0.460268929 | 1.29E-29  | postive |
| ZNF419    | CCDC18-AS1 | 0.549053885 | 9.13E-44  | postive |
| VEGFA     | CCDC18-AS1 | 0.418455238 | 2.91E-24  | postive |
| TUBE1     | CCDC18-AS1 | 0.641516079 | 7.89E-64  | postive |
| SETD1B    | CCDC18-AS1 | 0.419687456 | 2.08E-24  | postive |
| ALOX12    | CCDC18-AS1 | 0.703391966 | 1.20E-81  | postive |
| GABPB1    | CCDC18-AS1 | 0.431352717 | 7.79E-26  | postive |
| PHKG2     | CCDC18-AS1 | 0.462102587 | 7.22E-30  | postive |
| ATM       | CCDC18-AS1 | 0.506773649 | 1.65E-36  | postive |
| TAZ       | CCDC18-AS1 | 0.553216244 | 1.55E-44  | postive |
| FBXW7     | CCDC18-AS1 | 0.476213809 | 7.34E-32  | postive |
| HELLS     | AL359962.2 | 0.480710289 | 1.63E-32  | postive |
| ALOX12    | AL359962.2 | 0.425202685 | 4.47E-25  | postive |
| ATM       | AL359962.2 | 0.513067104 | 1.59E-37  | postive |
| TAZ       | AL033384.2 | 0.41979429  | 2.02E-24  | postive |
| SLC3A2    | AC009779.2 | 0.565067889 | 8.54E-47  | postive |
| NFS1      | AC009779.2 | 0.453028913 | 1.23E-28  | postive |
| FH        | AC009779.2 | 0.51762978  | 2.83E-38  | postive |
| ISCU      | AC009779.2 | 0.697026431 | 1.32E-79  | postive |
| DDIT3     | AC009779.2 | 0.539907399 | 4.16E-42  | postive |
| HERPUD1   | AC009779.2 | 0.421682259 | 1.19E-24  | postive |
| SLC2A8    | AC009779.2 | 0.425466343 | 4.15E-25  | postive |
| SLC2A12   | AC009779.2 | 0.427557504 | 2.30E-25  | postive |
| CS        | AC009779.2 | 0.45809015  | 2.56E-29  | postive |
| GOT1      | AC009779.2 | 0.510269199 | 4.53E-37  | postive |
| ATG4D     | AC009779.2 | 0.636264779 | 1.67E-62  | postive |
| GABARAPL1 | AC009779.2 | 0.733332412 | 4.83E-92  | postive |
| WIP1      | AC009779.2 | 0.54773711  | 1.59E-43  | postive |
| LPIN1     | AC009779.2 | 0.589570974 | 9.18E-52  | postive |
| HELLS     | AL359880.1 | 0.537385339 | 1.17E-41  | postive |
| TUBE1     | AL359880.1 | 0.445279281 | 1.31E-27  | postive |
| GABPB1    | AL359880.1 | 0.559115537 | 1.19E-45  | postive |
| LINC00472 | AL359880.1 | 0.745756345 | 8.83E-97  | postive |
| ATM       | AL359880.1 | 0.661952341 | 3.03E-69  | postive |
| FBXW7     | AL359880.1 | 0.466962661 | 1.52E-30  | postive |
| HELLS     | AL050343.2 | 0.520913709 | 8.02E-39  | postive |
| ZNF419    | AL050343.2 | 0.459920559 | 1.44E-29  | postive |
| ZFP69B    | AL050343.2 | 0.407336751 | 5.84E-23  | postive |
| TUBE1     | AL050343.2 | 0.612679875 | 7.44E-57  | postive |
| ALOX12    | AL050343.2 | 0.582416707 | 2.87E-50  | postive |
| IREB2     | AL050343.2 | 0.414231156 | 9.22E-24  | postive |
| GABPB1    | AL050343.2 | 0.592996498 | 1.71E-52  | postive |
| MAPK8     | AL050343.2 | 0.510043108 | 4.93E-37  | postive |
| LINC00472 | AL050343.2 | 0.575846964 | 6.27E-49  | postive |
| ATM       | AL050343.2 | 0.78220997  | 1.94E-112 | postive |
| FBXW7     | AL050343.2 | 0.537715789 | 1.02E-41  | postive |
| HELLS     | AC011477.1 | 0.507340617 | 1.34E-36  | postive |
| ZNF419    | AC011477.1 | 0.590150397 | 6.92E-52  | postive |
| KLHL24    | AC011477.1 | 0.500242776 | 1.78E-35  | postive |
| TUBE1     | AC011477.1 | 0.603831702 | 7.42E-55  | postive |
| ALOX12    | AC011477.1 | 0.534275935 | 4.12E-41  | postive |
| IREB2     | AC011477.1 | 0.435836838 | 2.13E-26  | postive |

|           |            |              |          |          |
|-----------|------------|--------------|----------|----------|
| GABPB1    | AC011477.1 | 0.649019561  | 9.06E-66 | postive  |
| MAPK8     | AC011477.1 | 0.499585775  | 2.26E-35 | postive  |
| LINC00472 | AC011477.1 | 0.669213441  | 2.84E-71 | postive  |
| ATM       | AC011477.1 | 0.742383779  | 1.82E-95 | postive  |
| FBXW7     | AC011477.1 | 0.5894828    | 9.58E-52 | postive  |
| FANCD2    | AC073896.3 | 0.422401408  | 9.78E-25 | postive  |
| TFAP2C    | AC073896.3 | 0.461087683  | 9.96E-30 | postive  |
| DUOX1     | AC073896.3 | 0.422728566  | 8.93E-25 | postive  |
| FANCD2    | LINC01134  | 0.401392383  | 2.77E-22 | postive  |
| TFAP2C    | LINC01134  | 0.406986925  | 6.41E-23 | postive  |
| HRAS      | AC104316.2 | 0.414003664  | 9.81E-24 | postive  |
| EGLN2     | AC104316.2 | 0.477979725  | 4.07E-32 | postive  |
| HSPB1     | SNHG25     | 0.480135125  | 1.97E-32 | postive  |
| HRAS      | SNHG25     | 0.571454478  | 4.75E-48 | postive  |
| PHKG2     | SNHG25     | 0.488203563  | 1.25E-33 | postive  |
| EGLN2     | SNHG25     | 0.559093389  | 1.20E-45 | postive  |
| TAZ       | SNHG25     | 0.443473957  | 2.24E-27 | postive  |
| HELLS     | NRIR       | 0.449434408  | 3.72E-28 | postive  |
| ZNF419    | NRIR       | 0.438996204  | 8.46E-27 | postive  |
| TUBE1     | NRIR       | 0.575597252  | 7.04E-49 | postive  |
| ALOX12    | NRIR       | 0.593739762  | 1.19E-52 | postive  |
| GABPB1    | NRIR       | 0.461225502  | 9.53E-30 | postive  |
| ATM       | NRIR       | 0.52062949   | 8.95E-39 | postive  |
| FBXW7     | NRIR       | 0.47504708   | 1.08E-31 | postive  |
| HELLS     | Z98884.1   | 0.442178592  | 3.30E-27 | postive  |
| ZNF419    | Z98884.1   | 0.457998847  | 2.63E-29 | postive  |
| TUBE1     | Z98884.1   | 0.52494867   | 1.67E-39 | postive  |
| ALOX12    | Z98884.1   | 0.572474052  | 2.97E-48 | postive  |
| GABPB1    | Z98884.1   | 0.498807462  | 2.99E-35 | postive  |
| MAPK8     | Z98884.1   | 0.407194745  | 6.07E-23 | postive  |
| LINC00472 | Z98884.1   | 0.583953153  | 1.38E-50 | postive  |
| ATM       | Z98884.1   | 0.65170377   | 1.78E-66 | postive  |
| FBXW7     | Z98884.1   | 0.417917873  | 3.38E-24 | postive  |
| HSPB1     | BNC2-AS1   | 0.485330715  | 3.37E-33 | postive  |
| HRAS      | BNC2-AS1   | 0.597011787  | 2.34E-53 | postive  |
| PHKG2     | BNC2-AS1   | 0.459836792  | 1.48E-29 | postive  |
| BECN1     | BNC2-AS1   | -0.400937895 | 3.12E-22 | negative |
| EGLN2     | BNC2-AS1   | 0.469937172  | 5.80E-31 | postive  |
| TAZ       | BNC2-AS1   | 0.477994926  | 4.05E-32 | postive  |
| TFAP2C    | AC107959.1 | 0.451615078  | 1.91E-28 | postive  |
| HBA1      | AC107959.1 | 0.43484653   | 2.84E-26 | postive  |
| ZFP69B    | AC107021.1 | 0.415992931  | 5.72E-24 | postive  |
| ATG7      | AC107021.1 | 0.434866145  | 2.83E-26 | postive  |
| TGFBR1    | AC107021.1 | 0.401542521  | 2.67E-22 | postive  |
| ATM       | AC107021.1 | 0.601466921  | 2.48E-54 | postive  |
| MTDH      | AC107021.1 | 0.404453328  | 1.25E-22 | postive  |
| BACH1     | AC107021.1 | 0.594221595  | 9.36E-53 | postive  |
| GDF15     | LINC01558  | 0.436595977  | 1.71E-26 | postive  |
| HELLS     | AC127070.2 | 0.464131309  | 3.78E-30 | postive  |
| TFAP2C    | AC127070.2 | 0.410735107  | 2.36E-23 | postive  |
| ZNF419    | AC009107.2 | 0.510469757  | 4.21E-37 | postive  |
| VEGFA     | AC009107.2 | 0.452666385  | 1.38E-28 | postive  |
| TUBE1     | AC009107.2 | 0.570395137  | 7.70E-48 | postive  |
| SETD1B    | AC009107.2 | 0.443094946  | 2.51E-27 | postive  |
| ALOX12    | AC009107.2 | 0.568380087  | 1.92E-47 | postive  |
| GABPB1    | AC009107.2 | 0.411083015  | 2.15E-23 | postive  |
| ATM       | AC009107.2 | 0.451299384  | 2.10E-28 | postive  |
| TAZ       | AC009107.2 | 0.439089596  | 8.23E-27 | postive  |

|           |            |             |          |         |
|-----------|------------|-------------|----------|---------|
| FBXW7     | AC009107.2 | 0.433461219 | 4.25E-26 | postive |
| FANCD2    | POLH-AS1   | 0.468658209 | 8.79E-31 | postive |
| HELLS     | POLH-AS1   | 0.561039501 | 5.12E-46 | postive |
| ALOX12    | POLH-AS1   | 0.480233159 | 1.91E-32 | postive |
| DUOX1     | POLH-AS1   | 0.418116501 | 3.20E-24 | postive |
| ZEB1      | LINC01738  | 0.477866206 | 4.23E-32 | postive |
| EPAS1     | LINC01738  | 0.578126353 | 2.17E-49 | postive |
| HELLS     | LINC01389  | 0.522868709 | 3.76E-39 | postive |
| ZNF419    | LINC01389  | 0.504612237 | 3.65E-36 | postive |
| TUBE1     | LINC01389  | 0.504370043 | 3.99E-36 | postive |
| ALOX12    | LINC01389  | 0.542437854 | 1.46E-42 | postive |
| GABPB1    | LINC01389  | 0.499004114 | 2.78E-35 | postive |
| ATM       | LINC01389  | 0.471511955 | 3.47E-31 | postive |
| TAZ       | LINC01389  | 0.439192504 | 7.98E-27 | postive |
| FBXW7     | LINC01389  | 0.48654141  | 2.22E-33 | postive |
| G6PD      | GAPLINC    | 0.409086961 | 3.67E-23 | postive |
| ZNF419    | AL359715.1 | 0.51498274  | 7.73E-38 | postive |
| TUBE1     | AL359715.1 | 0.536230607 | 1.87E-41 | postive |
| ALOX12    | AL359715.1 | 0.454542207 | 7.74E-29 | postive |
| LINC00472 | AL359715.1 | 0.437491543 | 1.32E-26 | postive |
| TAZ       | AL359715.1 | 0.408796992 | 3.97E-23 | postive |
| PHKG2     | LINC01431  | 0.596028078 | 3.82E-53 | postive |
| ATG4D     | LINC01431  | 0.418512114 | 2.87E-24 | postive |
| TAZ       | LINC01431  | 0.582732865 | 2.47E-50 | postive |
| HELLS     | Z98884.2   | 0.512058123 | 2.32E-37 | postive |
| ZNF419    | Z98884.2   | 0.607718124 | 1.00E-55 | postive |
| TUBE1     | Z98884.2   | 0.656033475 | 1.24E-67 | postive |
| SETD1B    | Z98884.2   | 0.446794505 | 8.27E-28 | postive |
| ALOX12    | Z98884.2   | 0.672006565 | 4.55E-72 | postive |
| GABPB1    | Z98884.2   | 0.586280579 | 4.52E-51 | postive |
| MAPK8     | Z98884.2   | 0.427837678 | 2.12E-25 | postive |
| LINC00472 | Z98884.2   | 0.519919654 | 1.18E-38 | postive |
| ATM       | Z98884.2   | 0.617098435 | 7.08E-58 | postive |
| FBXW7     | Z98884.2   | 0.542009712 | 1.75E-42 | postive |
| HELLS     | AP005131.2 | 0.517366169 | 3.13E-38 | postive |
| TUBE1     | AP005131.2 | 0.413893161 | 1.01E-23 | postive |
| ALOX12    | AP005131.2 | 0.413781575 | 1.04E-23 | postive |
| GABPB1    | AP005131.2 | 0.526861225 | 7.90E-40 | postive |
| LINC00472 | AP005131.2 | 0.503887034 | 4.76E-36 | postive |
| ATM       | AP005131.2 | 0.670322005 | 1.38E-71 | postive |
| FBXW7     | AP005131.2 | 0.486229411 | 2.48E-33 | postive |
| HELLS     | AC145207.5 | 0.493710597 | 1.83E-34 | postive |
| HBA1      | AC145207.5 | 0.418935955 | 2.55E-24 | postive |
| PCK2      | DHRS4-AS1  | 0.498492876 | 3.34E-35 | postive |
| AGPAT3    | DHRS4-AS1  | 0.429916079 | 1.18E-25 | postive |
| HELLS     | AC025580.3 | 0.511563769 | 2.80E-37 | postive |
| TUBE1     | AC025580.3 | 0.451842007 | 1.78E-28 | postive |
| ALOX12    | AC025580.3 | 0.52443086  | 2.05E-39 | postive |
| GABPB1    | AC025580.3 | 0.4392289   | 7.90E-27 | postive |
| LINC00472 | AC025580.3 | 0.404398274 | 1.27E-22 | postive |
| ATM       | AC025580.3 | 0.695673829 | 3.54E-79 | postive |
| FBXW7     | AC025580.3 | 0.42127439  | 1.34E-24 | postive |
| PCK2      | LINC02754  | 0.420322204 | 1.74E-24 | postive |
| ALOX12    | LINC02754  | 0.415048605 | 7.39E-24 | postive |
| PEBP1     | LINC02754  | 0.408450947 | 4.35E-23 | postive |
| MIOX      | LINC02754  | 0.541868908 | 1.85E-42 | postive |
| HELLS     | AL162274.1 | 0.486166961 | 2.53E-33 | postive |
| TUBE1     | AL162274.1 | 0.49633694  | 7.22E-35 | postive |

|           |            |             |           |         |
|-----------|------------|-------------|-----------|---------|
| ALOX12    | AL162274.1 | 0.617879362 | 4.65E-58  | postive |
| GABPB1    | AL162274.1 | 0.445494262 | 1.22E-27  | postive |
| MAPK8     | AL162274.1 | 0.476707356 | 6.23E-32  | postive |
| LINC00472 | AL162274.1 | 0.448386645 | 5.11E-28  | postive |
| ATM       | AL162274.1 | 0.743365369 | 7.57E-96  | postive |
| FBXW7     | AL162274.1 | 0.47289187  | 2.20E-31  | postive |
| SRXN1     | LINC02709  | 0.478887969 | 3.00E-32  | postive |
| FANCD2    | NFE2L1-DT  | 0.436919949 | 1.55E-26  | postive |
| HELLS     | NFE2L1-DT  | 0.431071072 | 8.45E-26  | postive |
| ZNF419    | NFE2L1-DT  | 0.509230352 | 6.67E-37  | postive |
| TUBE1     | NFE2L1-DT  | 0.441055946 | 4.60E-27  | postive |
| ALOX12    | NFE2L1-DT  | 0.579469167 | 1.15E-49  | postive |
| PHKG2     | NFE2L1-DT  | 0.532533809 | 8.30E-41  | postive |
| TAZ       | NFE2L1-DT  | 0.59946396  | 6.82E-54  | postive |
| PLIN2     | AC009060.1 | 0.411971172 | 1.70E-23  | postive |
| BNIP3     | AC009060.1 | 0.421018101 | 1.44E-24  | postive |
| ALB       | DCST1-AS1  | 0.519968775 | 1.15E-38  | postive |
| GPX2      | DCST1-AS1  | 0.418388854 | 2.97E-24  | postive |
| PSAT1     | DCST1-AS1  | 0.407239785 | 6.00E-23  | postive |
| TF        | DCST1-AS1  | 0.49042012  | 5.80E-34  | postive |
| TFR2      | DCST1-AS1  | 0.491723276 | 3.68E-34  | postive |
| CDO1      | DCST1-AS1  | 0.493131075 | 2.24E-34  | postive |
| ATM       | AC012464.1 | 0.511634693 | 2.72E-37  | postive |
| ZNF419    | AL391834.1 | 0.540714392 | 2.98E-42  | postive |
| KLHL24    | AL391834.1 | 0.464215776 | 3.68E-30  | postive |
| TUBE1     | AL391834.1 | 0.64066111  | 1.30E-63  | postive |
| ALOX12    | AL391834.1 | 0.483355506 | 6.63E-33  | postive |
| IREB2     | AL391834.1 | 0.403261722 | 1.71E-22  | postive |
| GABPB1    | AL391834.1 | 0.610866442 | 1.93E-56  | postive |
| KRAS      | AL391834.1 | 0.428733235 | 1.65E-25  | postive |
| MAPK8     | AL391834.1 | 0.531257395 | 1.38E-40  | postive |
| LINC00472 | AL391834.1 | 0.658081984 | 3.46E-68  | postive |
| PRKAA1    | AL391834.1 | 0.454439705 | 7.99E-29  | postive |
| ATM       | AL391834.1 | 0.606531579 | 1.85E-55  | postive |
| FBXW7     | AL391834.1 | 0.460781727 | 1.10E-29  | postive |
| ALOX12    | AC022211.2 | 0.409537163 | 3.26E-23  | postive |
| YY1AP1    | AC022211.2 | 0.400913227 | 3.14E-22  | postive |
| ZNF419    | AC025165.4 | 0.468840973 | 8.29E-31  | postive |
| ALOX12    | AC025165.4 | 0.469580421 | 6.52E-31  | postive |
| ATM       | AC025165.4 | 0.441480564 | 4.06E-27  | postive |
| TAZ       | AC025165.4 | 0.438179437 | 1.08E-26  | postive |
| TFAP2C    | AC090970.1 | 0.583840329 | 1.45E-50  | postive |
| HBA1      | AC090970.1 | 0.55459878  | 8.52E-45  | postive |
| DUOX1     | AC090970.1 | 0.415463297 | 6.60E-24  | postive |
| TUBE1     | AC104938.1 | 0.455053958 | 6.60E-29  | postive |
| ALOX12    | AC104938.1 | 0.404097657 | 1.37E-22  | postive |
| MAPK8     | AC104938.1 | 0.435661077 | 2.24E-26  | postive |
| HELLS     | AC007000.3 | 0.518783972 | 1.82E-38  | postive |
| TUBE1     | AC007000.3 | 0.529005382 | 3.39E-40  | postive |
| ALOX12    | AC007000.3 | 0.525897412 | 1.15E-39  | postive |
| IREB2     | AC007000.3 | 0.417466064 | 3.82E-24  | postive |
| GABPB1    | AC007000.3 | 0.566419341 | 4.66E-47  | postive |
| ATG7      | AC007000.3 | 0.476896633 | 5.85E-32  | postive |
| MAPK8     | AC007000.3 | 0.421086297 | 1.41E-24  | postive |
| LINC00472 | AC007000.3 | 0.614391588 | 3.00E-57  | postive |
| TLR4      | AC007000.3 | 0.408124135 | 4.74E-23  | postive |
| ATM       | AC007000.3 | 0.786592099 | 1.59E-114 | postive |
| FBXW7     | AC007000.3 | 0.527828388 | 5.40E-40  | postive |

|           |            |              |          |          |
|-----------|------------|--------------|----------|----------|
| HELLS     | AL021707.4 | 0.484584975  | 4.35E-33 | postive  |
| ZNF419    | AL021707.4 | 0.573489415  | 1.87E-48 | postive  |
| TUBE1     | AL021707.4 | 0.609046231  | 5.01E-56 | postive  |
| SETD1B    | AL021707.4 | 0.455092362  | 6.52E-29 | postive  |
| ALOX12    | AL021707.4 | 0.700104241  | 1.38E-80 | postive  |
| GABPB1    | AL021707.4 | 0.468317937  | 9.82E-31 | postive  |
| ATM       | AL021707.4 | 0.637793895  | 6.90E-63 | postive  |
| FBXW7     | AL021707.4 | 0.48538585   | 3.31E-33 | postive  |
| TFAP2C    | LINC02550  | 0.482802542  | 8.00E-33 | postive  |
| VEGFA     | LINC0001   | 0.415352615  | 6.80E-24 | postive  |
| TUBE1     | LINC0001   | 0.62860757   | 1.29E-60 | postive  |
| ALOX12    | LINC0001   | 0.592228637  | 2.50E-52 | postive  |
| ATM       | LINC0001   | 0.518022592  | 2.43E-38 | postive  |
| TAZ       | LINC0001   | 0.420789949  | 1.53E-24 | postive  |
| ALOX12    | AC004687.1 | 0.457676678  | 2.91E-29 | postive  |
| PHKG2     | AC004687.1 | 0.495555883  | 9.53E-35 | postive  |
| TAZ       | AC004687.1 | 0.548636399  | 1.09E-43 | postive  |
| HELLS     | AC141002.1 | 0.505230664  | 2.91E-36 | postive  |
| ZNF419    | AC141002.1 | 0.491573236  | 3.88E-34 | postive  |
| TUBE1     | AC141002.1 | 0.493805815  | 1.77E-34 | postive  |
| ALOX12    | AC141002.1 | 0.574289652  | 1.29E-48 | postive  |
| GABPB1    | AC141002.1 | 0.544188725  | 7.06E-43 | postive  |
| MAPK8     | AC141002.1 | 0.441479857  | 4.06E-27 | postive  |
| LINC00472 | AC141002.1 | 0.626475091  | 4.23E-60 | postive  |
| ATM       | AC141002.1 | 0.605715734  | 2.82E-55 | postive  |
| FBXW7     | AC141002.1 | 0.488659569  | 1.07E-33 | postive  |
| ZNF419    | CTC-338M12 | 0.417543136  | 3.74E-24 | postive  |
| TUBE1     | CTC-338M12 | 0.404717833  | 1.17E-22 | postive  |
| ALOX12    | CTC-338M12 | 0.520806505  | 8.36E-39 | postive  |
| TAZ       | CTC-338M12 | 0.456813551  | 3.82E-29 | postive  |
| HELLS     | AC131009.3 | 0.40071883   | 3.30E-22 | postive  |
| ZNF419    | AC131009.3 | 0.409641076  | 3.17E-23 | postive  |
| ALOX12    | AC131009.3 | 0.417678203  | 3.61E-24 | postive  |
| PHKG2     | AC131009.3 | 0.420247281  | 1.78E-24 | postive  |
| EGLN2     | AC131009.3 | 0.5896235    | 8.95E-52 | postive  |
| TAZ       | AC131009.3 | 0.45319837   | 1.17E-28 | postive  |
| HELLS     | ZBTB40-IT1 | 0.489459123  | 8.11E-34 | postive  |
| ZNF419    | ZBTB40-IT1 | 0.461773275  | 8.01E-30 | postive  |
| TUBE1     | ZBTB40-IT1 | 0.579574251  | 1.10E-49 | postive  |
| ALOX12    | ZBTB40-IT1 | 0.601420071  | 2.54E-54 | postive  |
| GABPB1    | ZBTB40-IT1 | 0.54629562   | 2.92E-43 | postive  |
| MAPK8     | ZBTB40-IT1 | 0.442577645  | 2.93E-27 | postive  |
| LINC00472 | ZBTB40-IT1 | 0.517779986  | 2.67E-38 | postive  |
| ATM       | ZBTB40-IT1 | 0.725926021  | 2.42E-89 | postive  |
| FBXW7     | ZBTB40-IT1 | 0.542704178  | 1.31E-42 | postive  |
| FANCD2    | DLGAP1-AS2 | 0.511380198  | 2.99E-37 | postive  |
| HELLS     | DLGAP1-AS2 | 0.466772177  | 1.62E-30 | postive  |
| BRD4      | DLGAP1-AS2 | 0.435486356  | 2.36E-26 | postive  |
| ASNS      | DLGAP1-AS2 | 0.440750832  | 5.04E-27 | postive  |
| G6PD      | DLGAP1-AS2 | 0.421789095  | 1.16E-24 | postive  |
| SCP2      | DLGAP1-AS2 | -0.406335876 | 7.61E-23 | negative |
| PHKG2     | DLGAP1-AS2 | 0.568523944  | 1.80E-47 | postive  |
| TAZ       | DLGAP1-AS2 | 0.590007387  | 7.42E-52 | postive  |
| RB1       | AC073073.2 | 0.537204263  | 1.26E-41 | postive  |
| TUBE1     | AC073073.2 | 0.428778929  | 1.63E-25 | postive  |
| IREB2     | AC073073.2 | 0.448588559  | 4.81E-28 | postive  |
| HMGB1     | AC073073.2 | 0.428760295  | 1.63E-25 | postive  |
| SP1       | AC073073.2 | 0.468519085  | 9.20E-31 | postive  |



|           |            |              |          |          |
|-----------|------------|--------------|----------|----------|
| GABPB1    | AC073073.2 | 0.426483277  | 3.12E-25 | postive  |
| NRAS      | AC073073.2 | 0.43870284   | 9.22E-27 | postive  |
| KRAS      | AC073073.2 | 0.440596135  | 5.28E-27 | postive  |
| MAPK8     | AC073073.2 | 0.517345592  | 3.15E-38 | postive  |
| PRKAA2    | AC073073.2 | 0.511655325  | 2.70E-37 | postive  |
| PRKAA1    | AC073073.2 | 0.510232486  | 4.60E-37 | postive  |
| ATM       | AC073073.2 | 0.538364469  | 7.82E-42 | postive  |
| SIRT1     | AC073073.2 | 0.504960207  | 3.22E-36 | postive  |
| LINC00472 | AL355472.3 | 0.649372796  | 7.32E-66 | postive  |
| HELLS     | AC020978.3 | 0.532960093  | 6.99E-41 | postive  |
| ZNF419    | AC020978.3 | 0.409923775  | 2.94E-23 | postive  |
| TUBE1     | AC020978.3 | 0.492066866  | 3.26E-34 | postive  |
| ALOX12    | AC020978.3 | 0.498001558  | 3.99E-35 | postive  |
| GABPB1    | AC020978.3 | 0.496144465  | 7.73E-35 | postive  |
| LINC00472 | AC020978.3 | 0.577467909  | 2.95E-49 | postive  |
| ATM       | AC020978.3 | 0.529361518  | 2.94E-40 | postive  |
| FBXW7     | AC020978.3 | 0.503056878  | 6.44E-36 | postive  |
| AGPAT3    | SH3RF3-AS1 | 0.46252947   | 6.30E-30 | postive  |
| NFS1      | MIR4435-2H | -0.427354166 | 2.44E-25 | negative |
| SLC2A6    | MIR4435-2H | 0.459569483  | 1.61E-29 | postive  |
| HIC1      | MIR4435-2H | 0.443163562  | 2.46E-27 | postive  |
| CS        | MIR4435-2H | -0.402175849 | 2.26E-22 | negative |
| LPCAT3    | MIR4435-2H | -0.471411713 | 3.58E-31 | negative |
| LINC00472 | AC135048.3 | 0.472119075  | 2.84E-31 | postive  |
| SLC3A2    | GTSE1-DT   | 0.469821482  | 6.02E-31 | postive  |
| ISCU      | GTSE1-DT   | 0.571760691  | 4.13E-48 | postive  |
| DDIT3     | GTSE1-DT   | 0.50558132   | 2.56E-36 | postive  |
| ATG4D     | GTSE1-DT   | 0.558968538  | 1.27E-45 | postive  |
| MAP1LC3A  | GTSE1-DT   | 0.425463318  | 4.15E-25 | postive  |
| GABARAPL1 | GTSE1-DT   | 0.58523488   | 7.46E-51 | postive  |
| WIPI2     | GTSE1-DT   | 0.437729793  | 1.23E-26 | postive  |
| BAP1      | GTSE1-DT   | 0.468130523  | 1.04E-30 | postive  |
| LPIN1     | GTSE1-DT   | 0.478772595  | 3.12E-32 | postive  |
| HELLS     | ABALON     | 0.464770021  | 3.08E-30 | postive  |
| MTOR      | ABALON     | 0.419414178  | 2.24E-24 | postive  |
| HIF1A     | ABALON     | 0.411964901  | 1.70E-23 | postive  |
| ATG7      | ABALON     | 0.597113883  | 2.22E-53 | postive  |
| LINC00472 | ABALON     | 0.440360045  | 5.66E-27 | postive  |
| ATM       | ABALON     | 0.446518792  | 8.99E-28 | postive  |
| HELLS     | AC005332.7 | 0.50051321   | 1.62E-35 | postive  |
| ZNF419    | AC005332.7 | 0.446622721  | 8.71E-28 | postive  |
| TUBE1     | AC005332.7 | 0.600540173  | 3.96E-54 | postive  |
| ALOX12    | AC005332.7 | 0.614517334  | 2.81E-57 | postive  |
| GABPB1    | AC005332.7 | 0.508262131  | 9.55E-37 | postive  |
| ATM       | AC005332.7 | 0.634017272  | 6.05E-62 | postive  |
| FBXW7     | AC005332.7 | 0.512124072  | 2.27E-37 | postive  |
| FANCD2    | LINC00426  | 0.533674274  | 5.25E-41 | postive  |
| HELLS     | LINC00426  | 0.419288563  | 2.32E-24 | postive  |
| PML       | LINC00426  | 0.440825699  | 4.93E-27 | postive  |
| GCH1      | LINC00426  | 0.513055123  | 1.60E-37 | postive  |
| IFNG      | LINC00426  | 0.710473476  | 5.49E-84 | postive  |
| TNFAIP3   | LINC00426  | 0.430644997  | 9.55E-26 | postive  |
| ZNF419    | LINC01176  | 0.454400223  | 8.08E-29 | postive  |
| VEGFA     | LINC01176  | 0.460035914  | 1.39E-29 | postive  |
| TUBE1     | LINC01176  | 0.534443129  | 3.85E-41 | postive  |
| ALOX12    | LINC01176  | 0.536652699  | 1.57E-41 | postive  |
| PHKG2     | LINC01176  | 0.562829693  | 2.32E-46 | postive  |
| TAZ       | LINC01176  | 0.743899084  | 4.69E-96 | postive  |

|           |            |              |           |          |
|-----------|------------|--------------|-----------|----------|
| MAPK8     | LINC01132  | 0.4056479    | 9.12E-23  | postive  |
| EPAS1     | LINC01132  | 0.468367088  | 9.67E-31  | postive  |
| GCH1      | BHLHE40-AS | 0.565996997  | 5.63E-47  | postive  |
| IFNG      | BHLHE40-AS | 0.705444146  | 2.55E-82  | postive  |
| TNFAIP3   | BHLHE40-AS | 0.408843537  | 3.92E-23  | postive  |
| HRAS      | AC015802.5 | 0.500666563  | 1.53E-35  | postive  |
| PHKG2     | AC015802.5 | 0.622638862  | 3.51E-59  | postive  |
| EGLN2     | AC015802.5 | 0.571596373  | 4.45E-48  | postive  |
| TAZ       | AC015802.5 | 0.667947131  | 6.47E-71  | postive  |
| KLHL24    | EP300-AS1  | 0.496947695  | 5.81E-35  | postive  |
| TUBE1     | EP300-AS1  | 0.446419288  | 9.27E-28  | postive  |
| IREB2     | EP300-AS1  | 0.456735135  | 3.91E-29  | postive  |
| GABPB1    | EP300-AS1  | 0.471192733  | 3.85E-31  | postive  |
| PIK3CA    | EP300-AS1  | 0.428259099  | 1.88E-25  | postive  |
| KRAS      | EP300-AS1  | 0.423877084  | 6.48E-25  | postive  |
| MAPK8     | EP300-AS1  | 0.483898102  | 5.51E-33  | postive  |
| LINC00472 | EP300-AS1  | 0.851275897  | 1.61E-152 | postive  |
| ATM       | EP300-AS1  | 0.575923697  | 6.05E-49  | postive  |
| KLHL24    | MALINC1    | 0.433446571  | 4.27E-26  | postive  |
| TUBE1     | MALINC1    | 0.449535941  | 3.60E-28  | postive  |
| IREB2     | MALINC1    | 0.435523465  | 2.34E-26  | postive  |
| EMC2      | MALINC1    | 0.444062058  | 1.88E-27  | postive  |
| MAPK8     | MALINC1    | 0.410221866  | 2.71E-23  | postive  |
| MAPK9     | MALINC1    | 0.423618507  | 6.97E-25  | postive  |
| PRKAA1    | MALINC1    | 0.469680712  | 6.31E-31  | postive  |
| ATM       | MALINC1    | 0.471807305  | 3.15E-31  | postive  |
| KLHL24    | AC025280.1 | 0.519796657  | 1.23E-38  | postive  |
| GABPB1    | AC025280.1 | 0.480397415  | 1.81E-32  | postive  |
| PIK3CA    | AC025280.1 | 0.42558445   | 4.01E-25  | postive  |
| LINC00472 | AC025280.1 | 0.902446585  | 1.54E-198 | postive  |
| ATM       | AC025280.1 | 0.458827274  | 2.03E-29  | postive  |
| TUBE1     | AL135791.1 | 0.530803025  | 1.66E-40  | postive  |
| ALOX12    | AL135791.1 | 0.598849665  | 9.30E-54  | postive  |
| ATM       | AL135791.1 | 0.52458212   | 1.93E-39  | postive  |
| PHKG2     | AC022079.2 | 0.433645366  | 4.03E-26  | postive  |
| TAZ       | AC022079.2 | 0.469811534  | 6.04E-31  | postive  |
| TUBE1     | AL360181.1 | 0.521090699  | 7.49E-39  | postive  |
| ALOX12    | AL360181.1 | 0.570578678  | 7.08E-48  | postive  |
| ATM       | AL360181.1 | 0.400331349  | 3.65E-22  | postive  |
| TAZ       | AL360181.1 | 0.414064552  | 9.65E-24  | postive  |
| CHMP6     | BX537318.1 | 0.42707726   | 2.63E-25  | postive  |
| PIK3CA    | BX537318.1 | -0.456440914 | 4.29E-29  | negative |
| KRAS      | BX537318.1 | -0.402776131 | 1.94E-22  | negative |
| PHKG2     | BX537318.1 | 0.431267388  | 7.99E-26  | postive  |
| TGFBR1    | BX537318.1 | -0.416170773 | 5.45E-24  | negative |
| TLR4      | BX537318.1 | -0.426437612 | 3.16E-25  | negative |
| TAZ       | BX537318.1 | 0.473845642  | 1.61E-31  | postive  |
| ALB       | LINC01018  | 0.862322303  | 7.86E-161 | postive  |
| GPX2      | LINC01018  | 0.6288769    | 1.11E-60  | postive  |
| TF        | LINC01018  | 0.575692097  | 6.74E-49  | postive  |
| TFR2      | LINC01018  | 0.702822747  | 1.83E-81  | postive  |
| CDO1      | LINC01018  | 0.817625738  | 7.40E-131 | postive  |
| KLHL24    | LINC02041  | 0.471237331  | 3.79E-31  | postive  |
| LINC00472 | LINC02041  | 0.446622074  | 8.72E-28  | postive  |
| KLHL24    | LINC02006  | 0.560482711  | 6.54E-46  | postive  |
| PIK3CA    | LINC02006  | 0.41595233   | 5.78E-24  | postive  |
| LINC00472 | LINC02006  | 0.843314337  | 6.16E-147 | postive  |
| ZNF419    | AL355297.3 | 0.435772587  | 2.17E-26  | postive  |

|           |            |             |          |         |
|-----------|------------|-------------|----------|---------|
| TUBE1     | AL355297.3 | 0.600114822 | 4.91E-54 | postive |
| ALOX12    | AL355297.3 | 0.567673897 | 2.65E-47 | postive |
| GABPB1    | AL355297.3 | 0.484271427 | 4.85E-33 | postive |
| LINC00472 | AL355297.3 | 0.480175309 | 1.95E-32 | postive |
| ATM       | AL355297.3 | 0.483202622 | 6.98E-33 | postive |
| PHKG2     | LINC02615  | 0.431190166 | 8.17E-26 | postive |
| TAZ       | LINC02615  | 0.499727981 | 2.15E-35 | postive |
| FBXW7     | LINC02615  | 0.400330896 | 3.65E-22 | postive |
| ATM       | SNHG26     | 0.432901639 | 4.99E-26 | postive |
| PHKG2     | AP003392.5 | 0.4575165   | 3.06E-29 | postive |
| TAZ       | AP003392.5 | 0.544731329 | 5.63E-43 | postive |
| FANCD2    | AC015802.3 | 0.401581984 | 2.64E-22 | postive |
| ALOX12    | AC015802.3 | 0.516916006 | 3.71E-38 | postive |
| TFAP2C    | AC015802.3 | 0.465092303 | 2.78E-30 | postive |
| HBA1      | AC015802.3 | 0.422869894 | 8.59E-25 | postive |
| DUOX1     | AC015802.3 | 0.402947497 | 1.85E-22 | postive |
| FANCD2    | TMPO-AS1   | 0.543601989 | 9.02E-43 | postive |
| HELLS     | TMPO-AS1   | 0.438098482 | 1.10E-26 | postive |
| RRM2      | TMPO-AS1   | 0.47635852  | 6.99E-32 | postive |
| AURKA     | TMPO-AS1   | 0.509121057 | 6.95E-37 | postive |
| TAZ       | TMPO-AS1   | 0.400346692 | 3.64E-22 | postive |
| HIC1      | SOCAR      | 0.421389992 | 1.30E-24 | postive |
| GABPB1    | SOCAR      | 0.459426877 | 1.68E-29 | postive |
| HELLS     | NLGN1-AS1  | 0.516142699 | 4.98E-38 | postive |
| GABPB1    | NLGN1-AS1  | 0.477467967 | 4.83E-32 | postive |
| ATG7      | NLGN1-AS1  | 0.473972618 | 1.54E-31 | postive |
| LINC00472 | NLGN1-AS1  | 0.451025569 | 2.29E-28 | postive |
| ATM       | NLGN1-AS1  | 0.695675456 | 3.53E-79 | postive |
| FBXW7     | NLGN1-AS1  | 0.44457282  | 1.61E-27 | postive |
| ELAVL1    | AL928921.1 | 0.404266477 | 1.31E-22 | postive |
| WIP1      | AL928921.1 | 0.424921129 | 4.84E-25 | postive |
| IDH1      | AL928921.1 | 0.416189075 | 5.42E-24 | postive |
| HRAS      | AC068338.3 | 0.475585397 | 9.05E-32 | postive |
| EGLN2     | AC068338.3 | 0.492518977 | 2.78E-34 | postive |
| ALOX12    | AL451042.1 | 0.441787955 | 3.71E-27 | postive |
| ATM       | AL451042.1 | 0.432257352 | 6.01E-26 | postive |
| FBXW7     | AL451042.1 | 0.405084661 | 1.06E-22 | postive |
| VEGFA     | AC004771.2 | 0.419365251 | 2.27E-24 | postive |
| SETD1B    | AC004771.2 | 0.504564452 | 3.72E-36 | postive |
| ALOX12    | AC004771.2 | 0.527515689 | 6.10E-40 | postive |
| ULK2      | AC004771.2 | 0.42337083  | 7.47E-25 | postive |
| YY1AP1    | AC004771.2 | 0.400952317 | 3.11E-22 | postive |
| FANCD2    | AC126118.1 | 0.465749255 | 2.25E-30 | postive |
| HELLS     | AC126118.1 | 0.553162536 | 1.58E-44 | postive |
| ZNF419    | AC126118.1 | 0.57049315  | 7.36E-48 | postive |
| TUBE1     | AC126118.1 | 0.585270745 | 7.34E-51 | postive |
| ALOX12    | AC126118.1 | 0.61973425  | 1.71E-58 | postive |
| GABPB1    | AC126118.1 | 0.485815301 | 2.86E-33 | postive |
| PHKG2     | AC126118.1 | 0.409375233 | 3.40E-23 | postive |
| ATM       | AC126118.1 | 0.458376243 | 2.34E-29 | postive |
| TAZ       | AC126118.1 | 0.479626545 | 2.34E-32 | postive |
| FBXW7     | AC126118.1 | 0.426870179 | 2.79E-25 | postive |
| HELLS     | AC027514.2 | 0.502144233 | 8.97E-36 | postive |
| ZNF419    | AC027514.2 | 0.400083077 | 3.89E-22 | postive |
| KLHL24    | AC027514.2 | 0.47231459  | 2.66E-31 | postive |
| TUBE1     | AC027514.2 | 0.492875566 | 2.46E-34 | postive |
| ALOX12    | AC027514.2 | 0.467255733 | 1.39E-30 | postive |
| IREB2     | AC027514.2 | 0.458218288 | 2.46E-29 | postive |

|           |            |              |           |          |
|-----------|------------|--------------|-----------|----------|
| GABPB1    | AC027514.2 | 0.58699384   | 3.20E-51  | postive  |
| PIK3CA    | AC027514.2 | 0.459688592  | 1.55E-29  | postive  |
| ATG7      | AC027514.2 | 0.422351329  | 9.92E-25  | postive  |
| MAPK8     | AC027514.2 | 0.461837521  | 7.85E-30  | postive  |
| LINC00472 | AC027514.2 | 0.819971066  | 3.23E-132 | postive  |
| ATM       | AC027514.2 | 0.735238291  | 9.42E-93  | postive  |
| FBXW7     | AC027514.2 | 0.504891793  | 3.30E-36  | postive  |
| BRD4      | AL135999.1 | 0.447275752  | 7.15E-28  | postive  |
| ZNF419    | AL135999.1 | 0.606649925  | 1.74E-55  | postive  |
| VEGFA     | AL135999.1 | 0.512443829  | 2.01E-37  | postive  |
| TUBE1     | AL135999.1 | 0.524072785  | 2.35E-39  | postive  |
| SETD1B    | AL135999.1 | 0.545180464  | 4.67E-43  | postive  |
| DRD4      | AL135999.1 | 0.412442691  | 1.50E-23  | postive  |
| ALOX12    | AL135999.1 | 0.666637342  | 1.51E-70  | postive  |
| PHKG2     | AL135999.1 | 0.520788355  | 8.41E-39  | postive  |
| YY1AP1    | AL135999.1 | 0.417653391  | 3.63E-24  | postive  |
| TAZ       | AL135999.1 | 0.731706948  | 1.92E-91  | postive  |
| HSPB1     | AC015922.2 | -0.402389963 | 2.14E-22  | negative |
| MAPK14    | AC015922.2 | 0.409386308  | 3.39E-23  | postive  |
| PIK3CA    | AC015922.2 | 0.404027092  | 1.40E-22  | postive  |
| BECN1     | AC015922.2 | 0.480834689  | 1.56E-32  | postive  |
| TAZ       | AC015922.2 | -0.420390895 | 1.71E-24  | negative |
| HELLS     | MCCC1-AS1  | 0.405596102  | 9.25E-23  | postive  |
| ZNF419    | MCCC1-AS1  | 0.532031529  | 1.01E-40  | postive  |
| TUBE1     | MCCC1-AS1  | 0.595742275  | 4.40E-53  | postive  |
| SETD1B    | MCCC1-AS1  | 0.415465052  | 6.60E-24  | postive  |
| ALOX12    | MCCC1-AS1  | 0.633318522  | 9.02E-62  | postive  |
| GABPB1    | MCCC1-AS1  | 0.421428805  | 1.28E-24  | postive  |
| PHKG2     | MCCC1-AS1  | 0.437928176  | 1.16E-26  | postive  |
| LINC00472 | MCCC1-AS1  | 0.469661003  | 6.35E-31  | postive  |
| ATM       | MCCC1-AS1  | 0.478300118  | 3.66E-32  | postive  |
| TAZ       | MCCC1-AS1  | 0.503842475  | 4.84E-36  | postive  |
| FBXW7     | MCCC1-AS1  | 0.406113931  | 8.07E-23  | postive  |
| ISCU      | AC116351.1 | 0.43751539   | 1.31E-26  | postive  |
| CS        | AC116351.1 | 0.512584179  | 1.91E-37  | postive  |
| ATG4D     | AC116351.1 | 0.403179118  | 1.74E-22  | postive  |
| GABARAPL1 | AC116351.1 | 0.502401694  | 8.17E-36  | postive  |
| LPIN1     | AC116351.1 | 0.458907912  | 1.98E-29  | postive  |
| HELLS     | AC005899.6 | 0.49113346   | 4.52E-34  | postive  |
| ZNF419    | AC005899.6 | 0.499175103  | 2.62E-35  | postive  |
| TUBE1     | AC005899.6 | 0.542672295  | 1.33E-42  | postive  |
| ALOX12    | AC005899.6 | 0.652474726  | 1.11E-66  | postive  |
| GABPB1    | AC005899.6 | 0.410791258  | 2.33E-23  | postive  |
| ATM       | AC005899.6 | 0.457407552  | 3.17E-29  | postive  |
| TAZ       | AC005899.6 | 0.492635714  | 2.67E-34  | postive  |
| FBXW7     | AC005899.6 | 0.47887029   | 3.02E-32  | postive  |
| HELLS     | AP002336.2 | 0.464983685  | 2.88E-30  | postive  |
| KLHL24    | AP002336.2 | 0.40112424   | 2.97E-22  | postive  |
| GABPB1    | AP002336.2 | 0.474626022  | 1.24E-31  | postive  |
| LINC00472 | AP002336.2 | 0.757402548  | 1.76E-101 | postive  |
| ATM       | AP002336.2 | 0.453601246  | 1.03E-28  | postive  |
| TUBE1     | AL023653.1 | 0.410093536  | 2.81E-23  | postive  |
| ALOX12    | AL023653.1 | 0.422590502  | 9.28E-25  | postive  |
| PHKG2     | AL023653.1 | 0.46938697   | 6.94E-31  | postive  |
| IFNG      | AL023653.1 | 0.415997418  | 5.71E-24  | postive  |
| TAZ       | AL023653.1 | 0.513072487  | 1.59E-37  | postive  |
| FBXW7     | AL023653.1 | 0.466724748  | 1.64E-30  | postive  |
| HELLS     | PCBP1-AS1  | 0.429612974  | 1.28E-25  | postive  |

|           |            |              |          |          |
|-----------|------------|--------------|----------|----------|
| TUBE1     | PCBP1-AS1  | 0.564950865  | 9.00E-47 | postive  |
| ALOX12    | PCBP1-AS1  | 0.705084103  | 3.35E-82 | postive  |
| GABPB1    | PCBP1-AS1  | 0.408955377  | 3.80E-23 | postive  |
| ATM       | PCBP1-AS1  | 0.589534477  | 9.34E-52 | postive  |
| HELLS     | AL022067.1 | 0.534634638  | 3.56E-41 | postive  |
| TUBE1     | AL022067.1 | 0.454248842  | 8.47E-29 | postive  |
| GABPB1    | AL022067.1 | 0.559042361  | 1.23E-45 | postive  |
| ATG7      | AL022067.1 | 0.442077866  | 3.40E-27 | postive  |
| LINC00472 | AL022067.1 | 0.656785509  | 7.77E-68 | postive  |
| ATM       | AL022067.1 | 0.693187031  | 2.13E-78 | postive  |
| FBXW7     | AL022067.1 | 0.564361444  | 1.17E-46 | postive  |
| RIPK1     | LINC01128  | 0.426243174  | 3.33E-25 | postive  |
| ZEB1      | LINC01128  | 0.564796289  | 9.64E-47 | postive  |
| MAPK8     | LINC01128  | 0.415425573  | 6.67E-24 | postive  |
| EPAS1     | LINC01128  | 0.55891579   | 1.30E-45 | postive  |
| NF2       | ERVH-1     | 0.401520385  | 2.68E-22 | postive  |
| ZEB1      | AC103746.1 | 0.402306391  | 2.19E-22 | postive  |
| MAPK8     | AC103746.1 | 0.40339949   | 1.65E-22 | postive  |
| HELLS     | AC122129.1 | 0.474634838  | 1.24E-31 | postive  |
| ZNF419    | AC122129.1 | 0.470764083  | 4.43E-31 | postive  |
| TUBE1     | AC122129.1 | 0.491881718  | 3.48E-34 | postive  |
| ALOX12    | AC122129.1 | 0.671597899  | 5.95E-72 | postive  |
| GABPB1    | AC122129.1 | 0.430752264  | 9.26E-26 | postive  |
| DUOX1     | AC122129.1 | 0.411344829  | 2.01E-23 | postive  |
| MAPK8     | AC122129.1 | 0.430968686  | 8.70E-26 | postive  |
| ATM       | AC122129.1 | 0.571040705  | 5.73E-48 | postive  |
| FBXW7     | AC122129.1 | 0.458906532  | 1.98E-29 | postive  |
| ATM       | AL137847.1 | 0.44514827   | 1.36E-27 | postive  |
| HSPB1     | Z97653.1   | 0.406088264  | 8.13E-23 | postive  |
| HRAS      | Z97653.1   | 0.627917886  | 1.89E-60 | postive  |
| NCOA4     | Z97653.1   | -0.420718481 | 1.56E-24 | negative |
| PHKG2     | Z97653.1   | 0.477421837  | 4.91E-32 | postive  |
| EGLN2     | Z97653.1   | 0.676533495  | 2.24E-73 | postive  |
| TAZ       | Z97653.1   | 0.540050238  | 3.92E-42 | postive  |
| HELLS     | AC005005.3 | 0.442869226  | 2.69E-27 | postive  |
| ZNF419    | AC005005.3 | 0.476605506  | 6.44E-32 | postive  |
| ALOX12    | AC005005.3 | 0.459288001  | 1.76E-29 | postive  |
| GABPB1    | AC005005.3 | 0.516105206  | 5.05E-38 | postive  |
| LINC00472 | AC005005.3 | 0.58720267   | 2.89E-51 | postive  |
| ATM       | AC005005.3 | 0.509196479  | 6.75E-37 | postive  |
| FBXW7     | AC005005.3 | 0.431614529  | 7.23E-26 | postive  |
| BRD4      | AL022328.2 | 0.429673612  | 1.26E-25 | postive  |
| ZNF419    | AL022328.2 | 0.580018658  | 8.91E-50 | postive  |
| VEGFA     | AL022328.2 | 0.580183023  | 8.24E-50 | postive  |
| TUBE1     | AL022328.2 | 0.55604981   | 4.54E-45 | postive  |
| SETD1B    | AL022328.2 | 0.538379973  | 7.78E-42 | postive  |
| DRD4      | AL022328.2 | 0.482681506  | 8.33E-33 | postive  |
| ALOX12    | AL022328.2 | 0.680150664  | 1.94E-74 | postive  |
| PHKG2     | AL022328.2 | 0.483466687  | 6.38E-33 | postive  |
| TAZ       | AL022328.2 | 0.705879407  | 1.84E-82 | postive  |
| ISCU      | AL161630.1 | 0.473475749  | 1.82E-31 | postive  |
| CS        | AL161630.1 | 0.407463229  | 5.65E-23 | postive  |
| ATG4D     | AL161630.1 | 0.511150647  | 3.26E-37 | postive  |
| GABARAPL1 | AL161630.1 | 0.558343836  | 1.67E-45 | postive  |
| LPIN1     | AL161630.1 | 0.401820029  | 2.48E-22 | postive  |
| HELLS     | EHD4-AS1   | 0.460198035  | 1.32E-29 | postive  |
| TUBE1     | EHD4-AS1   | 0.40848725   | 4.31E-23 | postive  |
| GABPB1    | EHD4-AS1   | 0.512095165  | 2.29E-37 | postive  |

|           |            |              |           |          |
|-----------|------------|--------------|-----------|----------|
| LINC00472 | EHD4-AS1   | 0.465776636  | 2.23E-30  | postive  |
| ATM       | EHD4-AS1   | 0.678708738  | 5.16E-74  | postive  |
| FBXW7     | EHD4-AS1   | 0.450943476  | 2.34E-28  | postive  |
| HRAS      | AC004449.1 | 0.413401506  | 1.15E-23  | postive  |
| PHKG2     | AC004449.1 | 0.460514652  | 1.19E-29  | postive  |
| TAZ       | AC004449.1 | 0.56244842   | 2.74E-46  | postive  |
| NFS1      | LINC01197  | -0.414757322 | 8.00E-24  | negative |
| IL33      | LINC01197  | 0.652556681  | 1.06E-66  | postive  |
| HIC1      | LINC01197  | 0.55050808   | 4.92E-44  | postive  |
| GABPB1    | LINC01197  | 0.423506002  | 7.19E-25  | postive  |
| ZEB1      | LINC01197  | 0.591633439  | 3.35E-52  | postive  |
| EPAS1     | LINC01197  | 0.433278246  | 4.48E-26  | postive  |
| BRD4      | AP001107.4 | 0.457900056  | 2.72E-29  | postive  |
| ZNF419    | AP001107.4 | 0.577328682  | 3.14E-49  | postive  |
| VEGFA     | AP001107.4 | 0.492827164  | 2.50E-34  | postive  |
| TUBE1     | AP001107.4 | 0.55135808   | 3.43E-44  | postive  |
| SETD1B    | AP001107.4 | 0.524716832  | 1.83E-39  | postive  |
| ALOX12    | AP001107.4 | 0.578865396  | 1.53E-49  | postive  |
| TAZ       | AP001107.4 | 0.55373997   | 1.23E-44  | postive  |
| HELLS     | AC253536.3 | 0.458437632  | 2.30E-29  | postive  |
| MTOR      | AC253536.3 | 0.431056529  | 8.49E-26  | postive  |
| KLHL24    | AC253536.3 | 0.47621669   | 7.33E-32  | postive  |
| TUBE1     | AC253536.3 | 0.49379799   | 1.77E-34  | postive  |
| MAP3K5    | AC253536.3 | 0.404416922  | 1.26E-22  | postive  |
| ALOX12    | AC253536.3 | 0.495022125  | 1.15E-34  | postive  |
| IREB2     | AC253536.3 | 0.533533295  | 5.55E-41  | postive  |
| GABPB1    | AC253536.3 | 0.546592249  | 2.58E-43  | postive  |
| PIK3CA    | AC253536.3 | 0.482149312  | 9.99E-33  | postive  |
| MAPK8     | AC253536.3 | 0.533800436  | 4.99E-41  | postive  |
| LINC00472 | AC253536.3 | 0.793250495  | 8.64E-118 | postive  |
| PRKAA2    | AC253536.3 | 0.42147457   | 1.27E-24  | postive  |
| PRKAA1    | AC253536.3 | 0.414252591  | 9.17E-24  | postive  |
| ATM       | AC253536.3 | 0.770804431  | 3.15E-107 | postive  |
| FBXW7     | AC253536.3 | 0.489249057  | 8.72E-34  | postive  |
| TFAP2C    | SLC25A30-A | 0.511015835  | 3.43E-37  | postive  |
| HBA1      | SLC25A30-A | 0.453785028  | 9.78E-29  | postive  |
| DUOX1     | SLC25A30-A | 0.410767861  | 2.34E-23  | postive  |
| FH        | BAALC-AS2  | 0.412523177  | 1.46E-23  | postive  |
| ISCU      | BAALC-AS2  | 0.636132406  | 1.80E-62  | postive  |
| TMBIM4    | BAALC-AS2  | 0.459598088  | 1.59E-29  | postive  |
| CHMP5     | BAALC-AS2  | 0.40179852   | 2.50E-22  | postive  |
| GOT1      | BAALC-AS2  | 0.438854549  | 8.82E-27  | postive  |
| ATG4D     | BAALC-AS2  | 0.600156773  | 4.81E-54  | postive  |
| MAP1LC3A  | BAALC-AS2  | 0.427581308  | 2.28E-25  | postive  |
| GABARAPL2 | BAALC-AS2  | 0.610442162  | 2.42E-56  | postive  |
| GABARAPL1 | BAALC-AS2  | 0.530278303  | 2.04E-40  | postive  |
| JDP2      | LINC00920  | 0.551497279  | 3.23E-44  | postive  |
| ZFP69B    | LINC00920  | 0.424389811  | 5.61E-25  | postive  |
| ZEB1      | LINC00920  | 0.457069319  | 3.52E-29  | postive  |
| SLC2A12   | AC100793.4 | 0.651235266  | 2.36E-66  | postive  |
| PLIN4     | AC100793.4 | 0.432431048  | 5.72E-26  | postive  |
| TFAP2C    | GK-IT1     | 0.578837194  | 1.55E-49  | postive  |
| HBA1      | GK-IT1     | 0.530140799  | 2.16E-40  | postive  |
| DUOX1     | GK-IT1     | 0.412345457  | 1.53E-23  | postive  |
| TAZ       | CT66       | 0.427416174  | 2.39E-25  | postive  |
| HBA1      | RPARP-AS1  | 0.532734177  | 7.66E-41  | postive  |
| HRAS      | RPARP-AS1  | 0.564239301  | 1.24E-46  | postive  |
| EGLN2     | RPARP-AS1  | 0.739455018  | 2.41E-94  | postive  |

|           |            |             |           |         |
|-----------|------------|-------------|-----------|---------|
| ISCU      | AC104984.4 | 0.535219612 | 2.81E-41  | postive |
| ACSL3     | AC104984.4 | 0.417621449 | 3.66E-24  | postive |
| KLHL24    | AC104984.4 | 0.436428213 | 1.80E-26  | postive |
| ATG4D     | AC104984.4 | 0.467168499 | 1.42E-30  | postive |
| GABARAPL1 | AC104984.4 | 0.662362499 | 2.34E-69  | postive |
| LINC00472 | AC104984.4 | 0.417953685 | 3.34E-24  | postive |
| LPIN1     | AC104984.4 | 0.591661159 | 3.30E-52  | postive |
| HELLS     | RFX3-AS1   | 0.485432634 | 3.26E-33  | postive |
| ZNF419    | RFX3-AS1   | 0.423873469 | 6.49E-25  | postive |
| TUBE1     | RFX3-AS1   | 0.635273422 | 2.95E-62  | postive |
| ALOX12    | RFX3-AS1   | 0.636806957 | 1.22E-62  | postive |
| GABPB1    | RFX3-AS1   | 0.48042989  | 1.79E-32  | postive |
| MAPK8     | RFX3-AS1   | 0.417380128 | 3.91E-24  | postive |
| ATM       | RFX3-AS1   | 0.697113335 | 1.24E-79  | postive |
| FBXW7     | RFX3-AS1   | 0.519801275 | 1.23E-38  | postive |
| FANCD2    | AC123768.1 | 0.426418831 | 3.17E-25  | postive |
| ALOX12    | AC123768.1 | 0.430703413 | 9.39E-26  | postive |
| TFAP2C    | AC123768.1 | 0.521775875 | 5.75E-39  | postive |
| HBA1      | AC123768.1 | 0.517709457 | 2.74E-38  | postive |
| DUOX1     | AC123768.1 | 0.416489155 | 4.99E-24  | postive |
| CA9       | LINC02298  | 0.440170687 | 5.98E-27  | postive |
| HRAS      | LINC02298  | 0.460508572 | 1.20E-29  | postive |
| TAZ       | LINC02298  | 0.480605703 | 1.68E-32  | postive |
| ALOX12    | PXN-AS1    | 0.483883602 | 5.53E-33  | postive |
| PHKG2     | PXN-AS1    | 0.515727036 | 5.83E-38  | postive |
| TAZ       | PXN-AS1    | 0.628401661 | 1.45E-60  | postive |
| HELLS     | FTX        | 0.514376328 | 9.72E-38  | postive |
| KLHL24    | FTX        | 0.464425871 | 3.44E-30  | postive |
| TUBE1     | FTX        | 0.437193292 | 1.44E-26  | postive |
| IREB2     | FTX        | 0.439396975 | 7.52E-27  | postive |
| GABPB1    | FTX        | 0.580654665 | 6.60E-50  | postive |
| PIK3CA    | FTX        | 0.451283438 | 2.11E-28  | postive |
| ATG7      | FTX        | 0.458006033 | 2.63E-29  | postive |
| MAPK8     | FTX        | 0.434898829 | 2.80E-26  | postive |
| LINC00472 | FTX        | 0.825896867 | 9.60E-136 | postive |
| ATM       | FTX        | 0.709177167 | 1.49E-83  | postive |
| FBXW7     | FTX        | 0.470319628 | 5.12E-31  | postive |
| HELLS     | LINC02656  | 0.481211235 | 1.37E-32  | postive |
| ZNF419    | LINC02656  | 0.420707596 | 1.57E-24  | postive |
| VEGFA     | LINC02656  | 0.418121648 | 3.19E-24  | postive |
| TUBE1     | LINC02656  | 0.556851661 | 3.21E-45  | postive |
| ALOX12    | LINC02656  | 0.586835149 | 3.46E-51  | postive |
| GABPB1    | LINC02656  | 0.454294312 | 8.35E-29  | postive |
| ATM       | LINC02656  | 0.610602492 | 2.22E-56  | postive |
| FBXW7     | LINC02656  | 0.473890233 | 1.59E-31  | postive |
| ZFP69B    | AC108463.2 | 0.461707716 | 8.18E-30  | postive |
| GABPB1    | AC108463.2 | 0.44660314  | 8.77E-28  | postive |
| ZEB1      | AC108463.2 | 0.639258381 | 2.95E-63  | postive |
| ATM       | AC108463.2 | 0.447349913 | 7.00E-28  | postive |
| FBXW7     | AC108463.2 | 0.439345399 | 7.63E-27  | postive |
| HELLS     | DHDDS-AS1  | 0.589877679 | 7.90E-52  | postive |
| ZNF419    | DHDDS-AS1  | 0.447971412 | 5.80E-28  | postive |
| TUBE1     | DHDDS-AS1  | 0.545376922 | 4.30E-43  | postive |
| ALOX12    | DHDDS-AS1  | 0.595309598 | 5.46E-53  | postive |
| GABPB1    | DHDDS-AS1  | 0.561652014 | 3.90E-46  | postive |
| LINC00472 | DHDDS-AS1  | 0.526831747 | 7.99E-40  | postive |
| ATM       | DHDDS-AS1  | 0.756444988 | 4.40E-101 | postive |
| FBXW7     | DHDDS-AS1  | 0.528766318 | 3.72E-40  | postive |

|           |            |              |           |          |
|-----------|------------|--------------|-----------|----------|
| HELLS     | AC004596.1 | 0.436593835  | 1.71E-26  | postive  |
| MAFG      | AC004596.1 | 0.409548741  | 3.25E-23  | postive  |
| ALOX12    | AC004596.1 | 0.499366895  | 2.44E-35  | postive  |
| ATM       | AC004596.1 | 0.484523531  | 4.45E-33  | postive  |
| TFAP2C    | AL024508.1 | 0.55433634   | 9.54E-45  | postive  |
| HBA1      | AL024508.1 | 0.539922081  | 4.13E-42  | postive  |
| DUOX1     | AL024508.1 | 0.40817884   | 4.67E-23  | postive  |
| HELLS     | SDCBP2-AS1 | 0.46171535   | 8.16E-30  | postive  |
| ZNF419    | SDCBP2-AS1 | 0.40910699   | 3.65E-23  | postive  |
| KLHL24    | SDCBP2-AS1 | 0.501893028  | 9.83E-36  | postive  |
| TUBE1     | SDCBP2-AS1 | 0.506623453  | 1.75E-36  | postive  |
| ALOX12    | SDCBP2-AS1 | 0.455495429  | 5.76E-29  | postive  |
| IREB2     | SDCBP2-AS1 | 0.490728699  | 5.21E-34  | postive  |
| GABPB1    | SDCBP2-AS1 | 0.578992569  | 1.44E-49  | postive  |
| PIK3CA    | SDCBP2-AS1 | 0.480227424  | 1.91E-32  | postive  |
| KRAS      | SDCBP2-AS1 | 0.40828598   | 4.54E-23  | postive  |
| MAPK8     | SDCBP2-AS1 | 0.505274123  | 2.87E-36  | postive  |
| LINC00472 | SDCBP2-AS1 | 0.808751849  | 6.98E-126 | postive  |
| LPIN1     | SDCBP2-AS1 | 0.429942354  | 1.17E-25  | postive  |
| ATM       | SDCBP2-AS1 | 0.688481061  | 6.04E-77  | postive  |
| FBXW7     | SDCBP2-AS1 | 0.461749087  | 8.08E-30  | postive  |
| FH        | AL135999.3 | 0.403073936  | 1.79E-22  | postive  |
| ISCU      | AL135999.3 | 0.490378094  | 5.89E-34  | postive  |
| CS        | AL135999.3 | 0.407812255  | 5.15E-23  | postive  |
| ATG4D     | AL135999.3 | 0.442865726  | 2.69E-27  | postive  |
| GABARAPL1 | AL135999.3 | 0.570495869  | 7.35E-48  | postive  |
| LPIN1     | AL135999.3 | 0.448889514  | 4.39E-28  | postive  |
| NCOA4     | SCGB1B2P   | -0.424122385 | 6.05E-25  | negative |
| PHKG2     | SCGB1B2P   | 0.556258504  | 4.15E-45  | postive  |
| TAZ       | SCGB1B2P   | 0.533187315  | 6.38E-41  | postive  |
| HELLS     | AP003392.1 | 0.466864729  | 1.57E-30  | postive  |
| ZNF419    | AP003392.1 | 0.557497546  | 2.42E-45  | postive  |
| VEGFA     | AP003392.1 | 0.436761072  | 1.63E-26  | postive  |
| TUBE1     | AP003392.1 | 0.62071533   | 1.00E-58  | postive  |
| SETD1B    | AP003392.1 | 0.507494925  | 1.27E-36  | postive  |
| ALOX12    | AP003392.1 | 0.739358761  | 2.63E-94  | postive  |
| GABPB1    | AP003392.1 | 0.523767063  | 2.65E-39  | postive  |
| MAPK8     | AP003392.1 | 0.494714102  | 1.28E-34  | postive  |
| LINC00472 | AP003392.1 | 0.432494253  | 5.61E-26  | postive  |
| ATM       | AP003392.1 | 0.66666894   | 1.48E-70  | postive  |
| YY1AP1    | AP003392.1 | 0.426573278  | 3.04E-25  | postive  |
| FBXW7     | AP003392.1 | 0.525645448  | 1.27E-39  | postive  |
| HELLS     | FAM13A-AS1 | 0.454104275  | 8.86E-29  | postive  |
| ZNF419    | FAM13A-AS1 | 0.530927714  | 1.58E-40  | postive  |
| VEGFA     | FAM13A-AS1 | 0.444971546  | 1.43E-27  | postive  |
| TUBE1     | FAM13A-AS1 | 0.655096697  | 2.21E-67  | postive  |
| ALOX12    | FAM13A-AS1 | 0.69611884   | 2.56E-79  | postive  |
| GABPB1    | FAM13A-AS1 | 0.491333766  | 4.22E-34  | postive  |
| LINC00472 | FAM13A-AS1 | 0.439839151  | 6.60E-27  | postive  |
| ATM       | FAM13A-AS1 | 0.609941864  | 3.14E-56  | postive  |
| TAZ       | FAM13A-AS1 | 0.521837011  | 5.61E-39  | postive  |
| FBXW7     | FAM13A-AS1 | 0.526111444  | 1.06E-39  | postive  |
| AKR1C3    | AC016924.1 | 0.482329345  | 9.39E-33  | postive  |
| GPX4      | SNHG11     | 0.432581593  | 5.47E-26  | postive  |
| RB1       | SNHG11     | -0.418254976 | 3.08E-24  | negative |
| HSF1      | SNHG11     | 0.484520226  | 4.45E-33  | postive  |
| SRC       | SNHG11     | 0.429724704  | 1.24E-25  | postive  |
| OTUB1     | SNHG11     | 0.514189399  | 1.04E-37  | postive  |



|           |            |              |           |          |
|-----------|------------|--------------|-----------|----------|
| PIK3CA    | SNHG11     | -0.416038485 | 5.65E-24  | negative |
| NRAS      | SNHG11     | -0.437284778 | 1.40E-26  | negative |
| NCOA4     | SNHG11     | -0.415269538 | 6.96E-24  | negative |
| PHKG2     | SNHG11     | 0.673976007  | 1.23E-72  | postive  |
| ULK1      | SNHG11     | 0.409135445  | 3.62E-23  | postive  |
| ATG4D     | SNHG11     | 0.446777997  | 8.32E-28  | postive  |
| MAPK1     | SNHG11     | -0.450293571 | 2.86E-28  | negative |
| EPAS1     | SNHG11     | -0.406050914 | 8.21E-23  | negative |
| TAZ       | SNHG11     | 0.571854079  | 3.95E-48  | postive  |
| SIRT1     | SNHG11     | -0.439793432 | 6.69E-27  | negative |
| HELLS     | AC048344.4 | 0.577565969  | 2.81E-49  | postive  |
| TUBE1     | AC048344.4 | 0.452081131  | 1.65E-28  | postive  |
| GABPB1    | AC048344.4 | 0.546237129  | 3.00E-43  | postive  |
| LINC00472 | AC048344.4 | 0.558544637  | 1.53E-45  | postive  |
| ATM       | AC048344.4 | 0.602944193  | 1.17E-54  | postive  |
| FBXW7     | AC048344.4 | 0.432905447  | 4.99E-26  | postive  |
| HELLS     | LINC00621  | 0.491608343  | 3.83E-34  | postive  |
| GABPB1    | LINC00621  | 0.413811615  | 1.03E-23  | postive  |
| LINC00472 | LINC00621  | 0.400121219  | 3.85E-22  | postive  |
| ATM       | LINC00621  | 0.596488322  | 3.03E-53  | postive  |
| ALB       | LINC01485  | 0.843566052  | 4.15E-147 | postive  |
| GPX2      | LINC01485  | 0.627888907  | 1.93E-60  | postive  |
| TF        | LINC01485  | 0.567627459  | 2.70E-47  | postive  |
| TFR2      | LINC01485  | 0.693564611  | 1.62E-78  | postive  |
| CDO1      | LINC01485  | 0.78940368   | 6.88E-116 | postive  |
| HELLS     | AC013731.1 | 0.464484221  | 3.38E-30  | postive  |
| ZNF419    | AC013731.1 | 0.507468526  | 1.28E-36  | postive  |
| TUBE1     | AC013731.1 | 0.494359591  | 1.46E-34  | postive  |
| ALOX12    | AC013731.1 | 0.541741001  | 1.95E-42  | postive  |
| PHKG2     | AC013731.1 | 0.574629675  | 1.10E-48  | postive  |
| LINC00472 | AC013731.1 | 0.430437209  | 1.01E-25  | postive  |
| TAZ       | AC013731.1 | 0.621030184  | 8.45E-59  | postive  |
| TFAP2C    | AL357874.1 | 0.405395649  | 9.75E-23  | postive  |
| HBA1      | AL357874.1 | 0.429962527  | 1.16E-25  | postive  |
| ALOX12B   | AL357874.1 | 0.44393626   | 1.95E-27  | postive  |
| HELLS     | Z97832.2   | 0.52934273   | 2.96E-40  | postive  |
| ZNF419    | Z97832.2   | 0.613340275  | 5.25E-57  | postive  |
| VEGFA     | Z97832.2   | 0.448128637  | 5.53E-28  | postive  |
| TUBE1     | Z97832.2   | 0.675005486  | 6.22E-73  | postive  |
| SETD1B    | Z97832.2   | 0.45459128   | 7.62E-29  | postive  |
| ALOX12    | Z97832.2   | 0.756280958  | 5.14E-101 | postive  |
| GABPB1    | Z97832.2   | 0.538117707  | 8.66E-42  | postive  |
| LINC00472 | Z97832.2   | 0.426392067  | 3.20E-25  | postive  |
| ATM       | Z97832.2   | 0.617492824  | 5.72E-58  | postive  |
| TAZ       | Z97832.2   | 0.493315639  | 2.10E-34  | postive  |
| FBXW7     | Z97832.2   | 0.501394362  | 1.18E-35  | postive  |
| ATF4      | SNHG30     | 0.439839984  | 6.60E-27  | postive  |
| OTUB1     | SNHG30     | 0.408741533  | 4.03E-23  | postive  |
| HRAS      | SNHG30     | 0.417370515  | 3.92E-24  | postive  |
| SLC38A1   | SNHG30     | -0.407975895 | 4.93E-23  | negative |
| ANO6      | SNHG30     | -0.428917219 | 1.56E-25  | negative |
| TAZ       | SNHG30     | 0.461298853  | 9.31E-30  | postive  |
| VEGFA     | HPN-AS1    | 0.460401425  | 1.24E-29  | postive  |
| TUBE1     | HPN-AS1    | 0.523083501  | 3.46E-39  | postive  |
| ALOX12    | HPN-AS1    | 0.645111868  | 9.42E-65  | postive  |
| TAZ       | HPN-AS1    | 0.471478586  | 3.51E-31  | postive  |
| ALOX12    | LINC00235  | 0.479754231  | 2.24E-32  | postive  |
| GABPB1    | LINC00235  | 0.409422639  | 3.36E-23  | postive  |

|           |            |              |           |          |
|-----------|------------|--------------|-----------|----------|
| ATM       | LINC00235  | 0.507131584  | 1.45E-36  | postive  |
| HELLS     | AP003419.2 | 0.475470415  | 9.40E-32  | postive  |
| TUBE1     | AP003419.2 | 0.450714883  | 2.51E-28  | postive  |
| ALOX12    | AP003419.2 | 0.468555308  | 9.09E-31  | postive  |
| GABPB1    | AP003419.2 | 0.499859411  | 2.05E-35  | postive  |
| LINC00472 | AP003419.2 | 0.64774945   | 1.95E-65  | postive  |
| ATM       | AP003419.2 | 0.679736226  | 2.57E-74  | postive  |
| FBXW7     | AP003419.2 | 0.452587047  | 1.41E-28  | postive  |
| HSPA5     | AL157700.1 | -0.402119545 | 2.30E-22  | negative |
| ZNF419    | AL157700.1 | 0.410423167  | 2.57E-23  | postive  |
| TUBE1     | AL157700.1 | 0.492916017  | 2.42E-34  | postive  |
| TAZ       | AL157700.1 | 0.418118591  | 3.20E-24  | postive  |
| FANCD2    | SNHG4      | 0.560461455  | 6.60E-46  | postive  |
| HELLS     | SNHG4      | 0.525242938  | 1.49E-39  | postive  |
| HELLS     | AC015987.1 | 0.436582182  | 1.72E-26  | postive  |
| LINC00472 | AC015987.1 | 0.542681356  | 1.32E-42  | postive  |
| ATM       | AC015987.1 | 0.48216728   | 9.92E-33  | postive  |
| ISCU      | AC243964.3 | 0.580153108  | 8.36E-50  | postive  |
| ATG4D     | AC243964.3 | 0.505904589  | 2.28E-36  | postive  |
| GABARAPL1 | AC243964.3 | 0.5814664    | 4.50E-50  | postive  |
| LPIN1     | AC243964.3 | 0.494469179  | 1.40E-34  | postive  |
| HELLS     | AC114763.1 | 0.540451894  | 3.32E-42  | postive  |
| KLHL24    | AC114763.1 | 0.430406656  | 1.02E-25  | postive  |
| TUBE1     | AC114763.1 | 0.412163566  | 1.61E-23  | postive  |
| ALOX12    | AC114763.1 | 0.411224803  | 2.07E-23  | postive  |
| IREB2     | AC114763.1 | 0.420690522  | 1.57E-24  | postive  |
| GABPB1    | AC114763.1 | 0.547931195  | 1.47E-43  | postive  |
| PIK3CA    | AC114763.1 | 0.418071882  | 3.24E-24  | postive  |
| ATG7      | AC114763.1 | 0.446875653  | 8.07E-28  | postive  |
| LINC00472 | AC114763.1 | 0.774189684  | 9.64E-109 | postive  |
| ATM       | AC114763.1 | 0.710987173  | 3.69E-84  | postive  |
| FBXW7     | AC114763.1 | 0.450469401  | 2.71E-28  | postive  |
| HRAS      | LINC02716  | 0.404779633  | 1.15E-22  | postive  |
| HELLS     | AL157813.1 | 0.423273531  | 7.67E-25  | postive  |
| TUBE1     | AL157813.1 | 0.46825916   | 1.00E-30  | postive  |
| ALOX12    | AL157813.1 | 0.407683064  | 5.33E-23  | postive  |
| GABPB1    | AL157813.1 | 0.4865245    | 2.24E-33  | postive  |
| LINC00472 | AL157813.1 | 0.515163294  | 7.22E-38  | postive  |
| ATM       | AL157813.1 | 0.574669491  | 1.08E-48  | postive  |
| HSPB1     | AL122035.1 | -0.410071701 | 2.82E-23  | negative |
| OXSRI     | AL122035.1 | 0.439918115  | 6.45E-27  | postive  |
| EIF2S1    | AL122035.1 | 0.415577613  | 6.40E-24  | postive  |
| IREB2     | AL122035.1 | 0.471732576  | 3.23E-31  | postive  |
| ZEB1      | AL122035.1 | 0.443549399  | 2.19E-27  | postive  |
| MAPK8     | AL122035.1 | 0.512153514  | 2.24E-37  | postive  |
| ATM       | AL122035.1 | 0.463002223  | 5.42E-30  | postive  |
| SIRT1     | AL122035.1 | 0.492012524  | 3.32E-34  | postive  |
| LINC00472 | AC008035.1 | 0.411260527  | 2.05E-23  | postive  |
| FANCD2    | AC023825.2 | 0.410404327  | 2.58E-23  | postive  |
| HELLS     | AC023825.2 | 0.591854515  | 3.01E-52  | postive  |
| TUBE1     | AC023825.2 | 0.434633692  | 3.03E-26  | postive  |
| ALOX12    | AC023825.2 | 0.505264923  | 2.88E-36  | postive  |
| GABPB1    | AC023825.2 | 0.512387449  | 2.05E-37  | postive  |
| LINC00472 | AC023825.2 | 0.52642781   | 9.37E-40  | postive  |
| ATM       | AC023825.2 | 0.591498774  | 3.58E-52  | postive  |
| FBXW7     | AC023825.2 | 0.511813277  | 2.55E-37  | postive  |
| HSF1      | AC004812.2 | 0.400481615  | 3.51E-22  | postive  |
| ZNF419    | AC004812.2 | 0.442478749  | 3.02E-27  | postive  |

|           |            |             |           |         |
|-----------|------------|-------------|-----------|---------|
| PHKG2     | AC004812.2 | 0.454554702 | 7.71E-29  | postive |
| ATG4D     | AC004812.2 | 0.404257825 | 1.31E-22  | postive |
| TAZ       | AC004812.2 | 0.470989325 | 4.11E-31  | postive |
| ZNF419    | AL122035.2 | 0.516273574 | 4.74E-38  | postive |
| VEGFA     | AL122035.2 | 0.487144879 | 1.81E-33  | postive |
| TUBE1     | AL122035.2 | 0.55943074  | 1.04E-45  | postive |
| ALOX12    | AL122035.2 | 0.597104878 | 2.23E-53  | postive |
| GABPB1    | AL122035.2 | 0.46220915  | 6.98E-30  | postive |
| MAPK8     | AL122035.2 | 0.413281339 | 1.19E-23  | postive |
| ATM       | AL122035.2 | 0.507911131 | 1.09E-36  | postive |
| TAZ       | AL122035.2 | 0.400423386 | 3.56E-22  | postive |
| FBXW7     | AL122035.2 | 0.418010958 | 3.29E-24  | postive |
| ZNF419    | AC244197.2 | 0.415219042 | 7.06E-24  | postive |
| TUBE1     | AC244197.2 | 0.447357015 | 6.98E-28  | postive |
| ALOX12    | AC244197.2 | 0.500018358 | 1.93E-35  | postive |
| PHKG2     | AC244197.2 | 0.449125649 | 4.08E-28  | postive |
| TAZ       | AC244197.2 | 0.532888415 | 7.20E-41  | postive |
| ALOX12    | AC093249.2 | 0.444178571 | 1.82E-27  | postive |
| KLHL24    | CBR3-AS1   | 0.524917409 | 1.69E-39  | postive |
| GABARAPL1 | CBR3-AS1   | 0.407234452 | 6.00E-23  | postive |
| LINC00472 | CBR3-AS1   | 0.692014549 | 4.93E-78  | postive |
| LPIN1     | CBR3-AS1   | 0.554357258 | 9.45E-45  | postive |
| ZNF419    | AL121583.1 | 0.458683312 | 2.13E-29  | postive |
| TUBE1     | AL121583.1 | 0.484378355 | 4.67E-33  | postive |
| GABPB1    | AL121583.1 | 0.422138899 | 1.05E-24  | postive |
| PHKG2     | AL121583.1 | 0.455866061 | 5.13E-29  | postive |
| LINC00472 | AL121583.1 | 0.598877589 | 9.17E-54  | postive |
| TAZ       | AL121583.1 | 0.472612735 | 2.42E-31  | postive |
| HELLS     | AL121839.2 | 0.400006804 | 3.97E-22  | postive |
| GABPB1    | AL121839.2 | 0.456008619 | 4.91E-29  | postive |
| LINC00472 | AL121839.2 | 0.471952348 | 3.00E-31  | postive |
| ATM       | AL121839.2 | 0.42000453  | 1.90E-24  | postive |
| HRAS      | BTF3-DT    | 0.480080525 | 2.01E-32  | postive |
| PHKG2     | BTF3-DT    | 0.449583318 | 3.55E-28  | postive |
| EGLN2     | BTF3-DT    | 0.40305634  | 1.80E-22  | postive |
| TAZ       | BTF3-DT    | 0.489085463 | 9.23E-34  | postive |
| ZFP36     | AC011611.3 | 0.468326201 | 9.79E-31  | postive |
| KLHL24    | L3MBTL4-AS | 0.458029364 | 2.61E-29  | postive |
| GABPB1    | L3MBTL4-AS | 0.446269144 | 9.70E-28  | postive |
| PIK3CA    | L3MBTL4-AS | 0.401904978 | 2.43E-22  | postive |
| ATG7      | L3MBTL4-AS | 0.511194501 | 3.21E-37  | postive |
| LINC00472 | L3MBTL4-AS | 0.75867441  | 5.22E-102 | postive |
| TGFBR1    | L3MBTL4-AS | 0.464039866 | 3.89E-30  | postive |
| ATM       | L3MBTL4-AS | 0.540463299 | 3.31E-42  | postive |
| SLC3A2    | AL118558.3 | 0.466890528 | 1.56E-30  | postive |
| ATG4D     | AL118558.3 | 0.441255153 | 4.34E-27  | postive |
| ATM       | AC046134.2 | 0.408826978 | 3.93E-23  | postive |
| LAMP2     | ITGB1-DT   | 0.467619159 | 1.23E-30  | postive |
| KLHL24    | AC009032.1 | 0.584625683 | 9.99E-51  | postive |
| IREB2     | AC009032.1 | 0.404803542 | 1.14E-22  | postive |
| GABPB1    | AC009032.1 | 0.429673186 | 1.26E-25  | postive |
| PIK3CA    | AC009032.1 | 0.480672581 | 1.65E-32  | postive |
| KRAS      | AC009032.1 | 0.420003272 | 1.90E-24  | postive |
| LINC00472 | AC009032.1 | 0.955181988 | 4.52E-286 | postive |
| ATM       | AC009032.1 | 0.402582432 | 2.04E-22  | postive |
| LINC00472 | AL021578.1 | 0.638975526 | 3.48E-63  | postive |
| HSPB1     | HYI-AS1    | 0.431242196 | 8.05E-26  | postive |
| HBA1      | HYI-AS1    | 0.664507932 | 5.95E-70  | postive |

|           |            |             |           |         |
|-----------|------------|-------------|-----------|---------|
| HRAS      | HYI-AS1    | 0.711440536 | 2.60E-84  | postive |
| EGLN2     | HYI-AS1    | 0.868821589 | 4.57E-166 | postive |
| ZNF419    | ADIRF-AS1  | 0.516460691 | 4.41E-38  | postive |
| TUBE1     | ADIRF-AS1  | 0.414510125 | 8.55E-24  | postive |
| ALOX12    | ADIRF-AS1  | 0.499767704 | 2.12E-35  | postive |
| PHKG2     | ADIRF-AS1  | 0.439055444 | 8.31E-27  | postive |
| TAZ       | ADIRF-AS1  | 0.548045947 | 1.40E-43  | postive |
| HRAS      | LAMA5-AS1  | 0.513556228 | 1.32E-37  | postive |
| EGLN2     | LAMA5-AS1  | 0.510538907 | 4.10E-37  | postive |
| PTGS2     | AC132872.3 | 0.57386057  | 1.57E-48  | postive |
| VEGFA     | AC132872.3 | 0.485069668 | 3.69E-33  | postive |
| IL6       | AC132872.3 | 0.55648405  | 3.76E-45  | postive |
| SLC2A3    | AC132872.3 | 0.525207144 | 1.51E-39  | postive |
| TAZ       | AC132872.3 | 0.480402838 | 1.80E-32  | postive |
| HELLS     | AL731566.2 | 0.540193122 | 3.70E-42  | postive |
| ZNF419    | AL731566.2 | 0.487949899 | 1.37E-33  | postive |
| TUBE1     | AL731566.2 | 0.583823482 | 1.47E-50  | postive |
| ALOX12    | AL731566.2 | 0.612894301 | 6.64E-57  | postive |
| GABPB1    | AL731566.2 | 0.607058494 | 1.41E-55  | postive |
| MAPK8     | AL731566.2 | 0.493883167 | 1.72E-34  | postive |
| LINC00472 | AL731566.2 | 0.64969926  | 6.01E-66  | postive |
| ATM       | AL731566.2 | 0.773525681 | 1.92E-108 | postive |
| FBXW7     | AL731566.2 | 0.53345339  | 5.73E-41  | postive |
| HELLS     | AP001469.2 | 0.483720581 | 5.85E-33  | postive |
| ZNF419    | AP001469.2 | 0.487775068 | 1.45E-33  | postive |
| TUBE1     | AP001469.2 | 0.563938972 | 1.41E-46  | postive |
| SETD1B    | AP001469.2 | 0.413740819 | 1.05E-23  | postive |
| ALOX12    | AP001469.2 | 0.66066454  | 6.85E-69  | postive |
| GABPB1    | AP001469.2 | 0.502354295 | 8.31E-36  | postive |
| LINC00472 | AP001469.2 | 0.44653623  | 8.95E-28  | postive |
| ATM       | AP001469.2 | 0.674444615 | 9.04E-73  | postive |
| FBXW7     | AP001469.2 | 0.484104819 | 5.13E-33  | postive |
| TFAP2C    | AC010525.1 | 0.585656071 | 6.10E-51  | postive |
| HBA1      | AC010525.1 | 0.529859829 | 2.41E-40  | postive |
| DUOX1     | AC010525.1 | 0.409422583 | 3.36E-23  | postive |
| VEGFA     | FOXO6-AS1  | 0.429372048 | 1.37E-25  | postive |
| TAZ       | FOXO6-AS1  | 0.549357022 | 8.03E-44  | postive |
| HELLS     | AC008937.3 | 0.414193686 | 9.32E-24  | postive |
| KLHL24    | AC008937.3 | 0.434960744 | 2.75E-26  | postive |
| TUBE1     | AC008937.3 | 0.448599483 | 4.79E-28  | postive |
| IREB2     | AC008937.3 | 0.437461808 | 1.33E-26  | postive |
| GABPB1    | AC008937.3 | 0.536930208 | 1.40E-41  | postive |
| PIK3CA    | AC008937.3 | 0.443522329 | 2.21E-27  | postive |
| MAPK8     | AC008937.3 | 0.503802221 | 4.91E-36  | postive |
| LINC00472 | AC008937.3 | 0.747492681 | 1.83E-97  | postive |
| PRKAA2    | AC008937.3 | 0.408556809 | 4.23E-23  | postive |
| PRKAA1    | AC008937.3 | 0.466234796 | 1.93E-30  | postive |
| ATM       | AC008937.3 | 0.702586512 | 2.18E-81  | postive |
| FBXW7     | AC008937.3 | 0.465045756 | 2.82E-30  | postive |
| VEGFA     | AC009084.1 | 0.566663794 | 4.17E-47  | postive |
| TUBE1     | AC009084.1 | 0.470094669 | 5.51E-31  | postive |
| ALOX12    | AC009084.1 | 0.561994171 | 3.35E-46  | postive |
| ATM       | AC009084.1 | 0.40203942  | 2.34E-22  | postive |
| RGS4      | AL009178.2 | 0.630061291 | 5.70E-61  | postive |
| SLC3A2    | LINC01230  | 0.563334375 | 1.85E-46  | postive |
| FH        | LINC01230  | 0.469073701 | 7.68E-31  | postive |
| ISCU      | LINC01230  | 0.692834257 | 2.74E-78  | postive |
| DDIT3     | LINC01230  | 0.603426375 | 9.13E-55  | postive |

|           |            |             |           |          |
|-----------|------------|-------------|-----------|----------|
| HERPUD1   | LINC01230  | 0.436839098 | 1.59E-26  | postive  |
| SLC2A12   | LINC01230  | 0.430979804 | 8.67E-26  | postive  |
| CS        | LINC01230  | 0.490680622 | 5.30E-34  | postive  |
| GOT1      | LINC01230  | 0.475991444 | 7.90E-32  | postive  |
| ATG4D     | LINC01230  | 0.555794621 | 5.08E-45  | postive  |
| MAP1LC3A  | LINC01230  | 0.43517499  | 2.59E-26  | postive  |
| GABARAPL2 | LINC01230  | 0.430306534 | 1.05E-25  | postive  |
| GABARAPL1 | LINC01230  | 0.813652937 | 1.35E-128 | postive  |
| WIPI2     | LINC01230  | 0.41620051  | 5.40E-24  | postive  |
| LPIN1     | LINC01230  | 0.564768221 | 9.76E-47  | postive  |
| HELLS     | AL390208.1 | 0.559896861 | 8.46E-46  | postive  |
| ZNF419    | AL390208.1 | 0.423131943 | 7.98E-25  | postive  |
| TUBE1     | AL390208.1 | 0.5963787   | 3.20E-53  | postive  |
| ALOX12    | AL390208.1 | 0.539332525 | 5.26E-42  | postive  |
| GABPB1    | AL390208.1 | 0.56715141  | 3.35E-47  | postive  |
| MAPK8     | AL390208.1 | 0.413943525 | 9.97E-24  | postive  |
| LINC00472 | AL390208.1 | 0.468823979 | 8.33E-31  | postive  |
| ATM       | AL390208.1 | 0.709669887 | 1.02E-83  | postive  |
| FBXW7     | AL390208.1 | 0.520470766 | 9.51E-39  | postive  |
| KLHL24    | AC036214.2 | 0.638476252 | 4.65E-63  | postive  |
| IREB2     | AC036214.2 | 0.443757934 | 2.06E-27  | postive  |
| GABPB1    | AC036214.2 | 0.424515159 | 5.42E-25  | postive  |
| PIK3CA    | AC036214.2 | 0.492211655 | 3.10E-34  | postive  |
| KRAS      | AC036214.2 | 0.465371866 | 2.54E-30  | postive  |
| LINC00472 | AC036214.2 | 0.858650585 | 5.45E-158 | postive  |
| PRKAA1    | AC036214.2 | 0.423872577 | 6.49E-25  | postive  |
| TGFBR1    | AC036214.2 | 0.410205588 | 2.72E-23  | postive  |
| LPIN1     | AC036214.2 | 0.440062345 | 6.18E-27  | postive  |
| ATM       | AC036214.2 | 0.526546997 | 8.94E-40  | postive  |
| TFAP2C    | AL360157.1 | 0.587519356 | 2.48E-51  | postive  |
| HBA1      | AL360157.1 | 0.531070663 | 1.49E-40  | postive  |
| ZNF419    | AP001094.2 | 0.451499773 | 1.98E-28  | postive  |
| VEGFA     | AP001094.2 | 0.406910653 | 6.54E-23  | postive  |
| TUBE1     | AP001094.2 | 0.594132084 | 9.78E-53  | postive  |
| SETD1B    | AP001094.2 | 0.405488719 | 9.51E-23  | postive  |
| ALOX12    | AP001094.2 | 0.659149097 | 1.78E-68  | postive  |
| GABPB1    | AP001094.2 | 0.438991688 | 8.47E-27  | postive  |
| ATM       | AP001094.2 | 0.614508828 | 2.82E-57  | postive  |
| FBXW7     | AP001094.2 | 0.44989751  | 3.23E-28  | postive  |
| HELLS     | AL139407.1 | 0.541532625 | 2.13E-42  | postive  |
| ZNF419    | AL139407.1 | 0.410482792 | 2.53E-23  | postive  |
| KLHL24    | AL139407.1 | 0.429530347 | 1.31E-25  | postive  |
| TUBE1     | AL139407.1 | 0.526410648 | 9.43E-40  | postive  |
| ALOX12    | AL139407.1 | 0.492717271 | 2.60E-34  | postive  |
| IREB2     | AL139407.1 | 0.457169578 | 3.42E-29  | postive  |
| GABPB1    | AL139407.1 | 0.598267365 | 1.25E-53  | postive  |
| PIK3CA    | AL139407.1 | 0.442265067 | 3.22E-27  | postive  |
| ATG7      | AL139407.1 | 0.441073726 | 4.58E-27  | postive  |
| MAPK8     | AL139407.1 | 0.479196775 | 2.71E-32  | postive  |
| LINC00472 | AL139407.1 | 0.713177355 | 6.73E-85  | postive  |
| ATM       | AL139407.1 | 0.762002593 | 2.07E-103 | postive  |
| FBXW7     | AL139407.1 | 0.531966038 | 1.04E-40  | postive  |
| HBA1      | LINC01983  | 0.799117279 | 9.06E-121 | postive  |
| HRAS      | LINC01983  | 0.592077483 | 2.69E-52  | postive  |
| MAP1LC3A  | LINC01983  | 0.41373381  | 1.06E-23  | postive  |
| EGLN2     | LINC01983  | 0.8343566   | 5.11E-141 | postive  |
| HSPA5     | LINC01089  | -0.411272   | 2.05E-23  | negative |
| BRD4      | LINC01089  | 0.427337744 | 2.45E-25  | postive  |

|           |            |              |          |          |
|-----------|------------|--------------|----------|----------|
| ZNF419    | LINC01089  | 0.57087465   | 6.19E-48 | postive  |
| TUBE1     | LINC01089  | 0.461021019  | 1.02E-29 | postive  |
| SETD1B    | LINC01089  | 0.428964423  | 1.54E-25 | postive  |
| DRD4      | LINC01089  | 0.411902053  | 1.73E-23 | postive  |
| ALOX12    | LINC01089  | 0.526788057  | 8.13E-40 | postive  |
| NCOA4     | LINC01089  | -0.42177471  | 1.16E-24 | negative |
| PHKG2     | LINC01089  | 0.628098714  | 1.71E-60 | postive  |
| ULK1      | LINC01089  | 0.484814977  | 4.02E-33 | postive  |
| TAZ       | LINC01089  | 0.744157302  | 3.72E-96 | postive  |
| TFAP2C    | USP12-AS2  | 0.573316151  | 2.02E-48 | postive  |
| HBA1      | USP12-AS2  | 0.523117855  | 3.41E-39 | postive  |
| SLC7A5    | HOXB-AS4   | 0.4513646    | 2.06E-28 | postive  |
| NOX1      | AL354760.1 | 0.41240813   | 1.51E-23 | postive  |
| NCOA4     | AL354760.1 | -0.493544391 | 1.94E-34 | negative |
| PHKG2     | AL354760.1 | 0.696975687  | 1.37E-79 | postive  |
| BECN1     | AL354760.1 | -0.452365505 | 1.51E-28 | negative |
| TAZ       | AL354760.1 | 0.732764201  | 7.83E-92 | postive  |
| HELLS     | AC007365.1 | 0.404149662  | 1.35E-22 | postive  |
| ALOX12    | AC007365.1 | 0.439667959  | 6.94E-27 | postive  |
| IREB2     | AC007365.1 | 0.438221086  | 1.06E-26 | postive  |
| SP1       | AC007365.1 | 0.418142647  | 3.17E-24 | postive  |
| MAPK8     | AC007365.1 | 0.447557648  | 6.57E-28 | postive  |
| PRKAA2    | AC007365.1 | 0.426408991  | 3.18E-25 | postive  |
| ATM       | AC007365.1 | 0.665868168  | 2.48E-70 | postive  |
| SIRT1     | AC007365.1 | 0.400562855  | 3.44E-22 | postive  |
| HELLS     | AC004034.1 | 0.442305041  | 3.18E-27 | postive  |
| BRD4      | AC004034.1 | 0.440344986  | 5.68E-27 | postive  |
| ZNF419    | AC004034.1 | 0.454337174  | 8.24E-29 | postive  |
| TUBE1     | AC004034.1 | 0.510656306  | 3.92E-37 | postive  |
| SETD1B    | AC004034.1 | 0.42929559   | 1.40E-25 | postive  |
| ALOX12    | AC004034.1 | 0.575162647  | 8.61E-49 | postive  |
| PHKG2     | AC004034.1 | 0.516631906  | 4.13E-38 | postive  |
| TAZ       | AC004034.1 | 0.598879577  | 9.16E-54 | postive  |
| MAPK8     | AL078644.1 | 0.409287285  | 3.48E-23 | postive  |
| ATM       | AL078644.1 | 0.415787537  | 6.04E-24 | postive  |
| YY1AP1    | AL078644.1 | 0.416642626  | 4.79E-24 | postive  |
| KLHL24    | AC078850.2 | 0.435657871  | 2.25E-26 | postive  |
| GABARAPL1 | AC078850.2 | 0.430881237  | 8.92E-26 | postive  |
| LPIN1     | AC078850.2 | 0.432153891  | 6.19E-26 | postive  |
| HELLS     | AC114956.2 | 0.46751742   | 1.27E-30 | postive  |
| MTOR      | AC114956.2 | 0.415918561  | 5.83E-24 | postive  |
| ZNF419    | AC114956.2 | 0.441271441  | 4.32E-27 | postive  |
| TUBE1     | AC114956.2 | 0.483734128  | 5.82E-33 | postive  |
| ALOX12    | AC114956.2 | 0.416869518  | 4.50E-24 | postive  |
| IREB2     | AC114956.2 | 0.4013271    | 2.82E-22 | postive  |
| GABPB1    | AC114956.2 | 0.515835551  | 5.59E-38 | postive  |
| ATG7      | AC114956.2 | 0.425279553  | 4.37E-25 | postive  |
| MAPK8     | AC114956.2 | 0.447507761  | 6.67E-28 | postive  |
| ATM       | AC114956.2 | 0.675228295  | 5.36E-73 | postive  |
| FBXW7     | AC114956.2 | 0.509817298  | 5.36E-37 | postive  |
| GPX4      | AC098484.1 | -0.408143915 | 4.72E-23 | negative |
| RB1       | AC098484.1 | 0.480895692  | 1.53E-32 | postive  |
| HSPB1     | AC098484.1 | -0.50101398  | 1.35E-35 | negative |
| GCLC      | AC098484.1 | 0.422125169  | 1.06E-24 | postive  |
| STAT3     | AC098484.1 | 0.413672681  | 1.07E-23 | postive  |
| MTOR      | AC098484.1 | 0.511603549  | 2.75E-37 | postive  |
| OXSR1     | AC098484.1 | 0.509542274  | 5.94E-37 | postive  |
| MAP3K5    | AC098484.1 | 0.429450327  | 1.34E-25 | postive  |

|           |            |              |           |          |
|-----------|------------|--------------|-----------|----------|
| MAPK14    | AC098484.1 | 0.522558281  | 4.24E-39  | postive  |
| IREB2     | AC098484.1 | 0.684310356  | 1.11E-75  | postive  |
| SP1       | AC098484.1 | 0.464807017  | 3.05E-30  | postive  |
| PIK3CA    | AC098484.1 | 0.544877701  | 5.30E-43  | postive  |
| NRAS      | AC098484.1 | 0.558941687  | 1.29E-45  | postive  |
| KRAS      | AC098484.1 | 0.458929094  | 1.97E-29  | postive  |
| SLC1A5    | AC098484.1 | -0.401291069 | 2.85E-22  | negative |
| NCOA4     | AC098484.1 | 0.558436052  | 1.61E-45  | postive  |
| PHKG2     | AC098484.1 | -0.44997007  | 3.16E-28  | negative |
| BECN1     | AC098484.1 | 0.405437177  | 9.64E-23  | postive  |
| ULK2      | AC098484.1 | 0.408763771  | 4.00E-23  | postive  |
| MAPK1     | AC098484.1 | 0.579923073  | 9.32E-50  | postive  |
| ZEB1      | AC098484.1 | 0.469720319  | 6.23E-31  | postive  |
| MAPK8     | AC098484.1 | 0.627751951  | 2.08E-60  | postive  |
| MAPK9     | AC098484.1 | 0.425134374  | 4.56E-25  | postive  |
| PRKAA2    | AC098484.1 | 0.70528057   | 2.89E-82  | postive  |
| PRKAA1    | AC098484.1 | 0.553785679  | 1.21E-44  | postive  |
| ANO6      | AC098484.1 | 0.419321665  | 2.30E-24  | postive  |
| TLR4      | AC098484.1 | 0.542574899  | 1.38E-42  | postive  |
| ATM       | AC098484.1 | 0.588624686  | 1.45E-51  | postive  |
| MTDH      | AC098484.1 | 0.401114776  | 2.98E-22  | postive  |
| SIRT1     | AC098484.1 | 0.590724448  | 5.23E-52  | postive  |
| SLC2A12   | RHOXF1-AS1 | 0.646062826  | 5.34E-65  | postive  |
| PLIN4     | RHOXF1-AS1 | 0.416273089  | 5.30E-24  | postive  |
| ACO1      | RHOXF1-AS1 | 0.441147243  | 4.48E-27  | postive  |
| FANCD2    | AL596094.1 | 0.410296604  | 2.66E-23  | postive  |
| JDP2      | AL596094.1 | 0.501419084  | 1.17E-35  | postive  |
| KLHL24    | SIAH2-AS1  | 0.648227235  | 1.46E-65  | postive  |
| IREB2     | SIAH2-AS1  | 0.41831592   | 3.03E-24  | postive  |
| PIK3CA    | SIAH2-AS1  | 0.485535292  | 3.14E-33  | postive  |
| KRAS      | SIAH2-AS1  | 0.410856003  | 2.29E-23  | postive  |
| LINC00472 | SIAH2-AS1  | 0.804535443  | 1.31E-123 | postive  |
| LPIN1     | SIAH2-AS1  | 0.415031027  | 7.43E-24  | postive  |
| ATM       | SIAH2-AS1  | 0.430635969  | 9.57E-26  | postive  |
| HELLS     | AC107068.1 | 0.427212861  | 2.54E-25  | postive  |
| ZNF419    | AC107068.1 | 0.476956704  | 5.73E-32  | postive  |
| KLHL24    | AC107068.1 | 0.526685682  | 8.46E-40  | postive  |
| TUBE1     | AC107068.1 | 0.477931599  | 4.14E-32  | postive  |
| IREB2     | AC107068.1 | 0.468836611  | 8.30E-31  | postive  |
| GABPB1    | AC107068.1 | 0.610357897  | 2.53E-56  | postive  |
| PIK3CA    | AC107068.1 | 0.450058408  | 3.07E-28  | postive  |
| KRAS      | AC107068.1 | 0.461758203  | 8.05E-30  | postive  |
| MAPK8     | AC107068.1 | 0.536207245  | 1.88E-41  | postive  |
| LINC00472 | AC107068.1 | 0.722935833  | 2.81E-88  | postive  |
| PRKAA2    | AC107068.1 | 0.401130307  | 2.97E-22  | postive  |
| PRKAA1    | AC107068.1 | 0.462730207  | 5.91E-30  | postive  |
| ATM       | AC107068.1 | 0.608577278  | 6.40E-56  | postive  |
| FBXW7     | AC107068.1 | 0.493015056  | 2.34E-34  | postive  |
| FANCD2    | COX10-AS1  | 0.627582975  | 2.28E-60  | postive  |
| HELLS     | COX10-AS1  | 0.624670757  | 1.15E-59  | postive  |
| ANGPTL7   | COX10-AS1  | 0.438126981  | 1.09E-26  | postive  |
| ZNF419    | COX10-AS1  | 0.530438422  | 1.92E-40  | postive  |
| ZFP69B    | COX10-AS1  | 0.456905579  | 3.71E-29  | postive  |
| TUBE1     | COX10-AS1  | 0.434016559  | 3.62E-26  | postive  |
| ALOX12    | COX10-AS1  | 0.55013831   | 5.76E-44  | postive  |
| GABPB1    | COX10-AS1  | 0.50058531   | 1.58E-35  | postive  |
| ULK2      | COX10-AS1  | 0.413456337  | 1.14E-23  | postive  |
| ATM       | COX10-AS1  | 0.482652883  | 8.42E-33  | postive  |

|           |            |              |           |          |
|-----------|------------|--------------|-----------|----------|
| FBXW7     | COX10-AS1  | 0.469167674  | 7.45E-31  | postive  |
| HELLS     | AC080162.1 | 0.565232078  | 7.93E-47  | postive  |
| ZNF419    | AC080162.1 | 0.417659215  | 3.63E-24  | postive  |
| TUBE1     | AC080162.1 | 0.520921545  | 7.99E-39  | postive  |
| ALOX12    | AC080162.1 | 0.575710844  | 6.68E-49  | postive  |
| GABPB1    | AC080162.1 | 0.562396389  | 2.81E-46  | postive  |
| MAPK8     | AC080162.1 | 0.4595221    | 1.63E-29  | postive  |
| LINC00472 | AC080162.1 | 0.59578501   | 4.31E-53  | postive  |
| ATM       | AC080162.1 | 0.761118679  | 4.91E-103 | postive  |
| FBXW7     | AC080162.1 | 0.515124385  | 7.32E-38  | postive  |
| NCOA4     | AC093249.6 | -0.436554902 | 1.73E-26  | negative |
| PHKG2     | AC093249.6 | 0.637089241  | 1.04E-62  | postive  |
| TAZ       | AC093249.6 | 0.641843542  | 6.51E-64  | postive  |
| GABPB1    | AL359076.1 | 0.404468293  | 1.24E-22  | postive  |
| LINC00472 | AL359076.1 | 0.518784443  | 1.82E-38  | postive  |
| HRAS      | BRWD1-AS2  | 0.465334383  | 2.57E-30  | postive  |
| EGLN2     | BRWD1-AS2  | 0.437645939  | 1.26E-26  | postive  |
| HSF1      | SNHG3      | 0.401703682  | 2.56E-22  | postive  |
| FANCD2    | SNHG3      | 0.566807453  | 3.91E-47  | postive  |
| HELLS     | SNHG3      | 0.530389264  | 1.95E-40  | postive  |
| STMN1     | SNHG3      | 0.484529979  | 4.44E-33  | postive  |
| RRM2      | SNHG3      | 0.497458311  | 4.84E-35  | postive  |
| AURKA     | SNHG3      | 0.472219673  | 2.75E-31  | postive  |
| PHKG2     | SNHG3      | 0.44756944   | 6.55E-28  | postive  |
| BID       | SNHG3      | 0.406529727  | 7.23E-23  | postive  |
| CDKN2A    | SNHG3      | 0.568664572  | 1.69E-47  | postive  |
| TAZ       | SNHG3      | 0.518642515  | 1.92E-38  | postive  |
| KLHL24    | AC025271.3 | 0.57890789   | 1.50E-49  | postive  |
| PIK3CA    | AC025271.3 | 0.445633027  | 1.17E-27  | postive  |
| LINC00472 | AC025271.3 | 0.925390201  | 2.04E-228 | postive  |
| NNMT      | LINC00160  | 0.475898266  | 8.15E-32  | postive  |
| FANCD2    | AL360091.1 | 0.409568269  | 3.23E-23  | postive  |
| HELLS     | AL360091.1 | 0.42917413   | 1.45E-25  | postive  |
| ALOX12    | AL360091.1 | 0.410986041  | 2.21E-23  | postive  |
| TFAP2C    | AL360091.1 | 0.536321812  | 1.80E-41  | postive  |
| HBA1      | AL360091.1 | 0.46635726   | 1.85E-30  | postive  |
| DUOX1     | AL360091.1 | 0.437885947  | 1.17E-26  | postive  |
| ZNF419    | AL353708.3 | 0.439371047  | 7.57E-27  | postive  |
| TUBE1     | AL353708.3 | 0.446344108  | 9.48E-28  | postive  |
| GABPB1    | AL353708.3 | 0.423592874  | 7.02E-25  | postive  |
| PHKG2     | AL353708.3 | 0.500286545  | 1.76E-35  | postive  |
| LINC00472 | AL353708.3 | 0.405756053  | 8.87E-23  | postive  |
| TAZ       | AL353708.3 | 0.520259513  | 1.03E-38  | postive  |
| TUBE1     | LINC01238  | 0.446199572  | 9.90E-28  | postive  |
| ALOX12    | LINC01238  | 0.51341662   | 1.40E-37  | postive  |
| TAZ       | LINC01238  | 0.480035392  | 2.04E-32  | postive  |
| FANCD2    | C1orf220   | 0.447586038  | 6.51E-28  | postive  |
| HELLS     | C1orf220   | 0.439523882  | 7.24E-27  | postive  |
| BRD4      | C1orf220   | 0.407816986  | 5.15E-23  | postive  |
| ZNF419    | C1orf220   | 0.586041507  | 5.07E-51  | postive  |
| TUBE1     | C1orf220   | 0.532789075  | 7.49E-41  | postive  |
| SETD1B    | C1orf220   | 0.456510775  | 4.20E-29  | postive  |
| ALOX12    | C1orf220   | 0.654932087  | 2.45E-67  | postive  |
| GABPB1    | C1orf220   | 0.431875751  | 6.71E-26  | postive  |
| LPIN1     | C1orf220   | 0.419078129  | 2.46E-24  | postive  |
| ATM       | C1orf220   | 0.465952253  | 2.11E-30  | postive  |
| TAZ       | C1orf220   | 0.476356068  | 7.00E-32  | postive  |
| FBXW7     | C1orf220   | 0.413689186  | 1.07E-23  | postive  |



|           |             |              |           |          |
|-----------|-------------|--------------|-----------|----------|
| ALOX12    | AL161669.1  | 0.547830263  | 1.53E-43  | postive  |
| KLHL24    | AC083843.2  | 0.590551657  | 5.69E-52  | postive  |
| IREB2     | AC083843.2  | 0.411707602  | 1.82E-23  | postive  |
| GABPB1    | AC083843.2  | 0.429760665  | 1.23E-25  | postive  |
| PIK3CA    | AC083843.2  | 0.44740548   | 6.88E-28  | postive  |
| KRAS      | AC083843.2  | 0.429671626  | 1.26E-25  | postive  |
| LINC00472 | AC083843.2  | 0.921668688  | 5.77E-223 | postive  |
| LPIN1     | AC083843.2  | 0.453524831  | 1.06E-28  | postive  |
| TFAP2C    | AL132639.2  | 0.545590032  | 3.93E-43  | postive  |
| HBA1      | AL132639.2  | 0.453453392  | 1.08E-28  | postive  |
| ZFP36     | AC087521.1  | 0.431480139  | 7.51E-26  | postive  |
| ATF3      | AC087521.1  | 0.409601834  | 3.20E-23  | postive  |
| HIC1      | AC087521.1  | 0.502393123  | 8.20E-36  | postive  |
| CHMP5     | RNASEH1-AS1 | 0.413788091  | 1.04E-23  | postive  |
| FANCD2    | AC012186.2  | 0.41394037   | 9.98E-24  | postive  |
| ALOX12    | AC012186.2  | 0.442404974  | 3.08E-27  | postive  |
| TFAP2C    | AC012186.2  | 0.540140094  | 3.78E-42  | postive  |
| HBA1      | AC012186.2  | 0.476243346  | 7.27E-32  | postive  |
| DUOX1     | AC012186.2  | 0.434013867  | 3.62E-26  | postive  |
| TSC22D3   | LINC00887   | 0.419166862  | 2.40E-24  | postive  |
| ALOX12    | LINC00887   | 0.406213147  | 7.86E-23  | postive  |
| HILPDA    | LINC00887   | 0.435217851  | 2.55E-26  | postive  |
| HELLS     | AC093535.1  | 0.436159391  | 1.94E-26  | postive  |
| ZNF419    | AC093535.1  | 0.415748998  | 6.11E-24  | postive  |
| KLHL24    | AC093535.1  | 0.435648047  | 2.25E-26  | postive  |
| TUBE1     | AC093535.1  | 0.474790247  | 1.18E-31  | postive  |
| ALOX12    | AC093535.1  | 0.429279653  | 1.41E-25  | postive  |
| GABPB1    | AC093535.1  | 0.545115884  | 4.79E-43  | postive  |
| LINC00472 | AC093535.1  | 0.825801844  | 1.10E-135 | postive  |
| ATM       | AC093535.1  | 0.618468353  | 3.39E-58  | postive  |
| FBXW7     | AC093535.1  | 0.48335765   | 6.62E-33  | postive  |
| FANCD2    | AL354892.3  | 0.42174396   | 1.17E-24  | postive  |
| HELLS     | AL354892.3  | 0.458206294  | 2.47E-29  | postive  |
| ZNF419    | AL354892.3  | 0.478062414  | 3.96E-32  | postive  |
| TUBE1     | AL354892.3  | 0.498522518  | 3.31E-35  | postive  |
| ALOX12    | AL354892.3  | 0.611118392  | 1.69E-56  | postive  |
| TFAP2C    | AL354892.3  | 0.418851669  | 2.61E-24  | postive  |
| DUOX1     | AL354892.3  | 0.415534658  | 6.48E-24  | postive  |
| FBXW7     | AL354892.3  | 0.415734341  | 6.13E-24  | postive  |
| TUBE1     | AC124319.2  | 0.44704222   | 7.68E-28  | postive  |
| ALOX12    | AC124319.2  | 0.409476394  | 3.31E-23  | postive  |
| BRD4      | ZNRD2-AS1   | 0.406565222  | 7.17E-23  | postive  |
| ZNF419    | ZNRD2-AS1   | 0.512860488  | 1.72E-37  | postive  |
| VEGFA     | ZNRD2-AS1   | 0.530684683  | 1.74E-40  | postive  |
| TUBE1     | ZNRD2-AS1   | 0.506520763  | 1.81E-36  | postive  |
| SETD1B    | ZNRD2-AS1   | 0.483464186  | 6.38E-33  | postive  |
| ALOX12    | ZNRD2-AS1   | 0.656883754  | 7.31E-68  | postive  |
| TAZ       | ZNRD2-AS1   | 0.543777868  | 8.38E-43  | postive  |
| ENPP2     | AC009686.2  | 0.621274743  | 7.39E-59  | postive  |
| HIC1      | AL138995.1  | 0.412951972  | 1.30E-23  | postive  |
| ZEB1      | AL138995.1  | 0.426358346  | 3.23E-25  | postive  |
| BRD4      | AC026471.4  | 0.455372523  | 5.98E-29  | postive  |
| ZNF419    | AC026471.4  | 0.491935839  | 3.42E-34  | postive  |
| TUBE1     | AC026471.4  | 0.411646893  | 1.85E-23  | postive  |
| DRD4      | AC026471.4  | 0.43805128   | 1.12E-26  | postive  |
| ALOX12    | AC026471.4  | 0.568246673  | 2.04E-47  | postive  |
| NCOA4     | AC026471.4  | -0.411810401 | 1.77E-23  | negative |
| PHKG2     | AC026471.4  | 0.509555964  | 5.91E-37  | postive  |

|           |             |             |           |         |
|-----------|-------------|-------------|-----------|---------|
| TAZ       | AC026471.4  | 0.564793587 | 9.65E-47  | postive |
| HELLS     | AP001363.1  | 0.529614044 | 2.66E-40  | postive |
| TUBE1     | AP001363.1  | 0.449071022 | 4.15E-28  | postive |
| ALOX12    | AP001363.1  | 0.498328262 | 3.55E-35  | postive |
| GABPB1    | AP001363.1  | 0.446373792 | 9.39E-28  | postive |
| LINC00472 | AP001363.1  | 0.415069381 | 7.35E-24  | postive |
| ATM       | AP001363.1  | 0.665795728 | 2.60E-70  | postive |
| FBXW7     | AP001363.1  | 0.473400102 | 1.86E-31  | postive |
| TUBE1     | AC090825.1  | 0.421660644 | 1.20E-24  | postive |
| ALOX12    | AC090825.1  | 0.480743718 | 1.61E-32  | postive |
| MAPK8     | AC090825.1  | 0.402636136 | 2.01E-22  | postive |
| ATM       | AC090825.1  | 0.539208225 | 5.54E-42  | postive |
| YY1AP1    | AC090825.1  | 0.427462772 | 2.36E-25  | postive |
| HELLS     | AL008723.2  | 0.521451856 | 6.51E-39  | postive |
| TUBE1     | AL008723.2  | 0.422878583 | 8.56E-25  | postive |
| ALOX12    | AL008723.2  | 0.45926618  | 1.77E-29  | postive |
| GABPB1    | AL008723.2  | 0.501240355 | 1.24E-35  | postive |
| LINC00472 | AL008723.2  | 0.584052047 | 1.31E-50  | postive |
| ATM       | AL008723.2  | 0.654749708 | 2.74E-67  | postive |
| FBXW7     | AL008723.2  | 0.429184915 | 1.45E-25  | postive |
| HELLS     | AL035071.2  | 0.465882177 | 2.16E-30  | postive |
| KLHL24    | AL035071.2  | 0.519525595 | 1.37E-38  | postive |
| TUBE1     | AL035071.2  | 0.420478315 | 1.67E-24  | postive |
| IREB2     | AL035071.2  | 0.44575983  | 1.13E-27  | postive |
| GABPB1    | AL035071.2  | 0.573086571 | 2.25E-48  | postive |
| PIK3CA    | AL035071.2  | 0.476533539 | 6.60E-32  | postive |
| ATG7      | AL035071.2  | 0.412894383 | 1.32E-23  | postive |
| MAPK8     | AL035071.2  | 0.436474187 | 1.77E-26  | postive |
| LINC00472 | AL035071.2  | 0.886797291 | 3.81E-182 | postive |
| PRKAA1    | AL035071.2  | 0.400947075 | 3.11E-22  | postive |
| ATM       | AL035071.2  | 0.677560499 | 1.12E-73  | postive |
| FBXW7     | AL035071.2  | 0.488717518 | 1.05E-33  | postive |
| RB1       | AP001372.2  | 0.540801155 | 2.88E-42  | postive |
| HSD17B11  | AP001372.2  | 0.457490434 | 3.09E-29  | postive |
| IREB2     | AP001372.2  | 0.408870006 | 3.89E-23  | postive |
| SCP2      | AP001372.2  | 0.535291234 | 2.73E-41  | postive |
| NRAS      | AP001372.2  | 0.423148987 | 7.94E-25  | postive |
| ATG5      | AP001372.2  | 0.409503632 | 3.29E-23  | postive |
| NCOA4     | AP001372.2  | 0.443852597 | 2.00E-27  | postive |
| SNX4      | AP001372.2  | 0.435150809 | 2.60E-26  | postive |
| MAPK1     | AP001372.2  | 0.469388578 | 6.94E-31  | postive |
| MAPK8     | AP001372.2  | 0.462626625 | 6.11E-30  | postive |
| MAPK9     | AP001372.2  | 0.420825272 | 1.52E-24  | postive |
| PRKAA2    | AP001372.2  | 0.530730392 | 1.71E-40  | postive |
| PRKAA1    | AP001372.2  | 0.501383115 | 1.18E-35  | postive |
| SIRT1     | AP001372.2  | 0.519571526 | 1.34E-38  | postive |
| STEAP3    | AC079209.1  | 0.514922067 | 7.91E-38  | postive |
| SETD1B    | AC245140.2  | 0.410694347 | 2.39E-23  | postive |
| ALOX12    | AC245140.2  | 0.47895854  | 2.93E-32  | postive |
| TAZ       | AC245140.2  | 0.448015424 | 5.72E-28  | postive |
| KLHL24    | RERG-AS1    | 0.576137221 | 5.48E-49  | postive |
| IREB2     | RERG-AS1    | 0.435664908 | 2.24E-26  | postive |
| PIK3CA    | RERG-AS1    | 0.447578    | 6.53E-28  | postive |
| KRAS      | RERG-AS1    | 0.401710807 | 2.55E-22  | postive |
| LINC00472 | RERG-AS1    | 0.85899005  | 3.00E-158 | postive |
| ATM       | RERG-AS1    | 0.459376136 | 1.71E-29  | postive |
| MUC1      | AC120498.10 | 0.448029028 | 5.70E-28  | postive |
| CD44      | AC120498.10 | 0.445527858 | 1.21E-27  | postive |

|           |             |             |          |         |
|-----------|-------------|-------------|----------|---------|
| SOCS1     | AC120498.10 | 0.55121862  | 3.64E-44 | postive |
| HELLS     | LINC02649   | 0.545947467 | 3.38E-43 | postive |
| ZNF419    | LINC02649   | 0.426324948 | 3.26E-25 | postive |
| TUBE1     | LINC02649   | 0.515798608 | 5.67E-38 | postive |
| ALOX12    | LINC02649   | 0.592871014 | 1.82E-52 | postive |
| GABPB1    | LINC02649   | 0.515420225 | 6.55E-38 | postive |
| LINC00472 | LINC02649   | 0.431844747 | 6.77E-26 | postive |
| ATM       | LINC02649   | 0.705012514 | 3.54E-82 | postive |
| FBXW7     | LINC02649   | 0.491005267 | 4.73E-34 | postive |
| BRD4      | AC008735.2  | 0.444851906 | 1.48E-27 | postive |
| ZNF419    | AC008735.2  | 0.501370311 | 1.19E-35 | postive |
| VEGFA     | AC008735.2  | 0.497190179 | 5.33E-35 | postive |
| TUBE1     | AC008735.2  | 0.491579562 | 3.87E-34 | postive |
| SETD1B    | AC008735.2  | 0.519885116 | 1.19E-38 | postive |
| DRD4      | AC008735.2  | 0.425389551 | 4.24E-25 | postive |
| ALOX12    | AC008735.2  | 0.545019104 | 4.99E-43 | postive |
| PHKG2     | AC008735.2  | 0.536135254 | 1.94E-41 | postive |
| TAZ       | AC008735.2  | 0.676690688 | 2.01E-73 | postive |
| ZNF419    | AC060780.1  | 0.497614937 | 4.58E-35 | postive |
| VEGFA     | AC060780.1  | 0.528200104 | 4.66E-40 | postive |
| TUBE1     | AC060780.1  | 0.562674852 | 2.48E-46 | postive |
| SETD1B    | AC060780.1  | 0.548586406 | 1.11E-43 | postive |
| ALOX12    | AC060780.1  | 0.683550378 | 1.88E-75 | postive |
| GABPB1    | AC060780.1  | 0.402327767 | 2.18E-22 | postive |
| MAPK8     | AC060780.1  | 0.414998379 | 7.49E-24 | postive |
| ATM       | AC060780.1  | 0.504328775 | 4.05E-36 | postive |
| YY1AP1    | AC060780.1  | 0.469913212 | 5.85E-31 | postive |
| SLC2A8    | AC020978.4  | 0.463851416 | 4.14E-30 | postive |
| ATG4D     | AC020978.4  | 0.489063981 | 9.30E-34 | postive |
| GABARAPL1 | AC020978.4  | 0.469998548 | 5.69E-31 | postive |
| LPIN1     | AC020978.4  | 0.507571599 | 1.23E-36 | postive |
| BRD4      | AC090589.3  | 0.433150259 | 4.65E-26 | postive |
| ZNF419    | AC090589.3  | 0.599983671 | 5.25E-54 | postive |
| VEGFA     | AC090589.3  | 0.548938525 | 9.59E-44 | postive |
| TUBE1     | AC090589.3  | 0.673533966 | 1.66E-72 | postive |
| SETD1B    | AC090589.3  | 0.539972703 | 4.05E-42 | postive |
| ALOX12    | AC090589.3  | 0.737767532 | 1.05E-93 | postive |
| GABPB1    | AC090589.3  | 0.439150172 | 8.08E-27 | postive |
| ATM       | AC090589.3  | 0.530690205 | 1.73E-40 | postive |
| YY1AP1    | AC090589.3  | 0.414152349 | 9.42E-24 | postive |
| TAZ       | AC090589.3  | 0.555980599 | 4.68E-45 | postive |
| FBXW7     | AC090589.3  | 0.49008809  | 6.51E-34 | postive |
| KLHL24    | LINC01948   | 0.406009573 | 8.30E-23 | postive |
| ATM       | LINC01948   | 0.436434518 | 1.79E-26 | postive |
| FANCD2    | AL512770.1  | 0.459909555 | 1.45E-29 | postive |
| BRD4      | AL512770.1  | 0.451893655 | 1.75E-28 | postive |
| ZNF419    | AL512770.1  | 0.494129671 | 1.58E-34 | postive |
| TUBE1     | AL512770.1  | 0.46016754  | 1.33E-29 | postive |
| DRD4      | AL512770.1  | 0.40424425  | 1.32E-22 | postive |
| ALOX12    | AL512770.1  | 0.639742011 | 2.23E-63 | postive |
| TAZ       | AL512770.1  | 0.466774208 | 1.62E-30 | postive |
| BRD4      | AC116913.1  | 0.436161724 | 1.94E-26 | postive |
| ZNF419    | AC116913.1  | 0.563058483 | 2.09E-46 | postive |
| TUBE1     | AC116913.1  | 0.51054132  | 4.10E-37 | postive |
| ALOX12    | AC116913.1  | 0.499546542 | 2.29E-35 | postive |
| GABPB1    | AC116913.1  | 0.447840098 | 6.03E-28 | postive |
| PHKG2     | AC116913.1  | 0.524357505 | 2.11E-39 | postive |
| EGLN2     | AC116913.1  | 0.415442541 | 6.64E-24 | postive |

|           |            |              |           |          |
|-----------|------------|--------------|-----------|----------|
| TAZ       | AC116913.1 | 0.591008565  | 4.55E-52  | postive  |
| FBXW7     | AC116913.1 | 0.42453788   | 5.39E-25  | postive  |
| ALOX15B   | MMP2-AS1   | 0.451380447  | 2.05E-28  | postive  |
| MTDH      | AP002761.3 | -0.426414798 | 3.18E-25  | negative |
| FANCD2    | AL135818.1 | 0.436875495  | 1.58E-26  | postive  |
| PML       | AL135818.1 | 0.409748696  | 3.08E-23  | postive  |
| GCH1      | AL135818.1 | 0.522600914  | 4.17E-39  | postive  |
| IFNG      | AL135818.1 | 0.662342293  | 2.37E-69  | postive  |
| MAPK8     | LINC01060  | 0.420955603  | 1.46E-24  | postive  |
| ATM       | LINC01060  | 0.453612777  | 1.03E-28  | postive  |
| NCF2      | AL133371.2 | 0.425176531  | 4.50E-25  | postive  |
| CYBB      | AL133371.2 | 0.607341051  | 1.22E-55  | postive  |
| ATG7      | AL133371.2 | 0.477861854  | 4.23E-32  | postive  |
| TLR4      | AL133371.2 | 0.517721877  | 2.73E-38  | postive  |
| ATM       | AL133371.2 | 0.500711332  | 1.51E-35  | postive  |
| DRD4      | DM1-AS     | 0.452250036  | 1.57E-28  | postive  |
| ALOX12    | DM1-AS     | 0.451282523  | 2.11E-28  | postive  |
| NRAS      | DM1-AS     | -0.412763456 | 1.37E-23  | negative |
| NCOA4     | DM1-AS     | -0.477019079 | 5.61E-32  | negative |
| PHKG2     | DM1-AS     | 0.632376812  | 1.54E-61  | postive  |
| TAZ       | DM1-AS     | 0.658831185  | 2.17E-68  | postive  |
| MTDH      | DM1-AS     | -0.430216804 | 1.08E-25  | negative |
| BACH1     | DM1-AS     | -0.417851349 | 3.44E-24  | negative |
| ATP6V1G2  | AC010997.4 | 0.441584296  | 3.94E-27  | postive  |
| WIP1      | AC010997.4 | 0.434385369  | 3.25E-26  | postive  |
| HELLS     | AC026202.2 | 0.418086738  | 3.22E-24  | postive  |
| KLHL24    | AC026202.2 | 0.404103086  | 1.37E-22  | postive  |
| GABPB1    | AC026202.2 | 0.432030391  | 6.42E-26  | postive  |
| LINC00472 | AC026202.2 | 0.779577726  | 3.30E-111 | postive  |
| ATM       | AC026202.2 | 0.533195248  | 6.36E-41  | postive  |
| FBXW7     | AC026202.2 | 0.426010654  | 3.56E-25  | postive  |
| IL33      | LINC00924  | 0.463913557  | 4.05E-30  | postive  |
| HIC1      | LINC00924  | 0.403241628  | 1.71E-22  | postive  |
| GPX4      | PCCA-DT    | 0.429974386  | 1.16E-25  | postive  |
| FH        | PCCA-DT    | 0.432739553  | 5.23E-26  | postive  |
| ISCU      | PCCA-DT    | 0.428999999  | 1.53E-25  | postive  |
| ATP5MC3   | PCCA-DT    | 0.45749571   | 3.08E-29  | postive  |
| GOT1      | PCCA-DT    | 0.410312565  | 2.65E-23  | postive  |
| ATG4D     | PCCA-DT    | 0.447654794  | 6.38E-28  | postive  |
| ISCU      | ZNF793-AS1 | 0.456145067  | 4.70E-29  | postive  |
| ATG4D     | ZNF793-AS1 | 0.501090874  | 1.31E-35  | postive  |
| BAP1      | ZNF793-AS1 | 0.470712912  | 4.50E-31  | postive  |
| AGPAT3    | AP000640.1 | 0.417485141  | 3.80E-24  | postive  |
| ACO1      | AP000640.1 | 0.578690597  | 1.66E-49  | postive  |
| WIP1      | AP000640.1 | 0.481957045  | 1.07E-32  | postive  |
| HELLS     | AC004908.1 | 0.432150697  | 6.20E-26  | postive  |
| ALOX12    | AC004908.1 | 0.480846749  | 1.55E-32  | postive  |
| TAZ       | AC004908.1 | 0.419680577  | 2.08E-24  | postive  |
| BRD4      | AC073575.2 | 0.41911403   | 2.43E-24  | postive  |
| ZNF419    | AC073575.2 | 0.484112674  | 5.12E-33  | postive  |
| TUBE1     | AC073575.2 | 0.504463108  | 3.86E-36  | postive  |
| SETD1B    | AC073575.2 | 0.513385281  | 1.41E-37  | postive  |
| ALOX12    | AC073575.2 | 0.558011236  | 1.93E-45  | postive  |
| PHKG2     | AC073575.2 | 0.508362548  | 9.20E-37  | postive  |
| TAZ       | AC073575.2 | 0.605168963  | 3.73E-55  | postive  |
| FANCD2    | AC114956.1 | 0.470870704  | 4.28E-31  | postive  |
| HELLS     | AC114956.1 | 0.506966952  | 1.54E-36  | postive  |
| ALOX12    | AC114956.1 | 0.481234014  | 1.36E-32  | postive  |

|           |             |              |          |          |
|-----------|-------------|--------------|----------|----------|
| TFAP2C    | AC114956.1  | 0.417515282  | 3.77E-24 | postive  |
| ATM       | AL592546.2  | 0.454909501  | 6.90E-29 | postive  |
| PSAT1     | AC022509.4  | 0.430791104  | 9.16E-26 | postive  |
| HELLS     | MIATNB      | 0.469852946  | 5.96E-31 | postive  |
| ZNF419    | MIATNB      | 0.418910092  | 2.57E-24 | postive  |
| HBA1      | MIATNB      | 0.436426293  | 1.80E-26 | postive  |
| GABPB1    | MIATNB      | 0.450073481  | 3.06E-28 | postive  |
| ATG7      | MIATNB      | 0.454263003  | 8.43E-29 | postive  |
| LINC00472 | MIATNB      | 0.4396185    | 7.04E-27 | postive  |
| LPIN1     | MIATNB      | 0.415718015  | 6.16E-24 | postive  |
| ATM       | MIATNB      | 0.480494876  | 1.75E-32 | postive  |
| EGLN2     | MIATNB      | 0.591971676  | 2.84E-52 | postive  |
| FBXW7     | MIATNB      | 0.485367835  | 3.33E-33 | postive  |
| TUBE1     | AC009065.8  | 0.404134633  | 1.36E-22 | postive  |
| NRAS      | AC009065.8  | -0.427386103 | 2.41E-25 | negative |
| PHKG2     | AC009065.8  | 0.667938245  | 6.51E-71 | postive  |
| ATG4D     | AC009065.8  | 0.499479731  | 2.35E-35 | postive  |
| TAZ       | AC009065.8  | 0.545094789  | 4.84E-43 | postive  |
| TFAP2C    | AC118755.1  | 0.594725473  | 7.29E-53 | postive  |
| HBA1      | AC118755.1  | 0.527918482  | 5.21E-40 | postive  |
| ALOX12    | KDM2B-DT    | 0.422796147  | 8.76E-25 | postive  |
| HRAS      | MIR4458HG   | 0.431963033  | 6.54E-26 | postive  |
| PHKG2     | AC073195.1  | 0.590621063  | 5.50E-52 | postive  |
| TAZ       | AC073195.1  | 0.625841121  | 6.01E-60 | postive  |
| HSF1      | AC063948.1  | 0.414956734  | 7.58E-24 | postive  |
| NCOA4     | AC063948.1  | -0.438455634 | 9.92E-27 | negative |
| PHKG2     | AC063948.1  | 0.692805944  | 2.80E-78 | postive  |
| TAZ       | AC063948.1  | 0.719098042  | 6.23E-87 | postive  |
| HSPB1     | AC099518.6  | 0.443654514  | 2.13E-27 | postive  |
| HBA1      | AC099518.6  | 0.591870386  | 2.98E-52 | postive  |
| HRAS      | AC099518.6  | 0.619065431  | 2.45E-58 | postive  |
| MAP1LC3A  | AC099518.6  | 0.42838874   | 1.82E-25 | postive  |
| EGLN2     | AC099518.6  | 0.705516116  | 2.42E-82 | postive  |
| BRD4      | AC022150.2  | 0.435197793  | 2.57E-26 | postive  |
| ZNF419    | AC022150.2  | 0.56538745   | 7.40E-47 | postive  |
| VEGFA     | AC022150.2  | 0.532207947  | 9.45E-41 | postive  |
| TUBE1     | AC022150.2  | 0.506575642  | 1.78E-36 | postive  |
| SETD1B    | AC022150.2  | 0.608540077  | 6.53E-56 | postive  |
| ALOX12    | AC022150.2  | 0.617536488  | 5.59E-58 | postive  |
| YY1AP1    | AC022150.2  | 0.443946017  | 1.95E-27 | postive  |
| TAZ       | AC022150.2  | 0.561734071  | 3.76E-46 | postive  |
| HELLS     | AC008870.2  | 0.463474266  | 4.66E-30 | postive  |
| BRD4      | AC008870.2  | 0.458380275  | 2.34E-29 | postive  |
| ZNF419    | AC008870.2  | 0.557430675  | 2.49E-45 | postive  |
| TUBE1     | AC008870.2  | 0.591704799  | 3.23E-52 | postive  |
| SETD1B    | AC008870.2  | 0.495219959  | 1.07E-34 | postive  |
| ALOX12    | AC008870.2  | 0.594627436  | 7.65E-53 | postive  |
| GABPB1    | AC008870.2  | 0.478088555  | 3.93E-32 | postive  |
| PHKG2     | AC008870.2  | 0.507691415  | 1.18E-36 | postive  |
| LINC00472 | AC008870.2  | 0.51731366   | 3.19E-38 | postive  |
| ATM       | AC008870.2  | 0.492016064  | 3.32E-34 | postive  |
| TAZ       | AC008870.2  | 0.581036725  | 5.51E-50 | postive  |
| FBXW7     | AC008870.2  | 0.46819448   | 1.02E-30 | postive  |
| ANGPTL7   | SEPTIN4-AS1 | 0.640737737  | 1.24E-63 | postive  |
| ALOX12    | CERS3-AS1   | 0.400494573  | 3.50E-22 | postive  |
| HELLS     | LINC00852   | 0.503089776  | 6.37E-36 | postive  |
| ZNF419    | LINC00852   | 0.456873115  | 3.75E-29 | postive  |
| TUBE1     | LINC00852   | 0.480978316  | 1.48E-32 | postive  |

|           |            |              |           |          |
|-----------|------------|--------------|-----------|----------|
| ALOX12    | LINC00852  | 0.496171765  | 7.66E-35  | postive  |
| GABPB1    | LINC00852  | 0.559378392  | 1.06E-45  | postive  |
| LINC00472 | LINC00852  | 0.600375104  | 4.31E-54  | postive  |
| ATM       | LINC00852  | 0.557349022  | 2.58E-45  | postive  |
| FBXW7     | LINC00852  | 0.511236451  | 3.16E-37  | postive  |
| PHKG2     | AL021392.1 | 0.404879194  | 1.12E-22  | postive  |
| TAZ       | AL021392.1 | 0.451150198  | 2.20E-28  | postive  |
| HELLS     | TMEM161B-, | 0.481563283  | 1.22E-32  | postive  |
| ZNF419    | TMEM161B-, | 0.462006668  | 7.44E-30  | postive  |
| TUBE1     | TMEM161B-, | 0.538061768  | 8.86E-42  | postive  |
| ALOX12    | TMEM161B-, | 0.465332699  | 2.57E-30  | postive  |
| GABPB1    | TMEM161B-, | 0.483076862  | 7.29E-33  | postive  |
| LINC00472 | TMEM161B-, | 0.639068589  | 3.30E-63  | postive  |
| ATM       | TMEM161B-, | 0.609455118  | 4.05E-56  | postive  |
| FBXW7     | TMEM161B-, | 0.449271772  | 3.90E-28  | postive  |
| EIF2S1    | AC026367.2 | -0.417478571 | 3.81E-24  | negative |
| PHKG2     | AC026367.2 | 0.406621627  | 7.06E-23  | postive  |
| TAZ       | AC026367.2 | 0.431180011  | 8.19E-26  | postive  |
| FH        | PDE11A-AS1 | 0.408847625  | 3.91E-23  | postive  |
| ISCU      | PDE11A-AS1 | 0.547894167  | 1.49E-43  | postive  |
| DDIT3     | PDE11A-AS1 | 0.471107511  | 3.96E-31  | postive  |
| GOT1      | PDE11A-AS1 | 0.448698584  | 4.65E-28  | postive  |
| ATG4D     | PDE11A-AS1 | 0.502907665  | 6.80E-36  | postive  |
| GABARAPL2 | PDE11A-AS1 | 0.441299482  | 4.28E-27  | postive  |
| GABARAPL1 | PDE11A-AS1 | 0.638618474  | 4.28E-63  | postive  |
| LPIN1     | PDE11A-AS1 | 0.425595098  | 4.00E-25  | postive  |
| KLHL24    | AC018552.3 | 0.525493733  | 1.35E-39  | postive  |
| GABPB1    | AC018552.3 | 0.434985514  | 2.73E-26  | postive  |
| PIK3CA    | AC018552.3 | 0.412855041  | 1.34E-23  | postive  |
| LINC00472 | AC018552.3 | 0.867968167  | 2.31E-165 | postive  |
| LPIN1     | AC018552.3 | 0.434162478  | 3.47E-26  | postive  |
| ATM       | AC018552.3 | 0.416925435  | 4.43E-24  | postive  |
| FANCD2    | AP002812.5 | 0.403823366  | 1.47E-22  | postive  |
| HELLS     | AP002812.5 | 0.501521536  | 1.12E-35  | postive  |
| TUBE1     | AP002812.5 | 0.412428791  | 1.50E-23  | postive  |
| ALOX12    | AP002812.5 | 0.499882995  | 2.03E-35  | postive  |
| TFAP2C    | AP002812.5 | 0.438069294  | 1.11E-26  | postive  |
| GABPB1    | AP002812.5 | 0.430736331  | 9.30E-26  | postive  |
| DUOX1     | AP002812.5 | 0.439709775  | 6.86E-27  | postive  |
| LINC00472 | AP002812.5 | 0.449948627  | 3.18E-28  | postive  |
| ATM       | AP002812.5 | 0.437706406  | 1.24E-26  | postive  |
| FBXW7     | AP002812.5 | 0.435711354  | 2.21E-26  | postive  |
| DRD4      | Z69706.1   | 0.404105648  | 1.37E-22  | postive  |
| HRAS      | Z69706.1   | 0.426485238  | 3.11E-25  | postive  |
| NCOA4     | Z69706.1   | -0.436448457 | 1.78E-26  | negative |
| PHKG2     | Z69706.1   | 0.552600267  | 2.01E-44  | postive  |
| EGLN2     | Z69706.1   | 0.466667489  | 1.67E-30  | postive  |
| TAZ       | Z69706.1   | 0.65041335   | 3.90E-66  | postive  |
| HELLS     | AC026470.2 | 0.471423912  | 3.57E-31  | postive  |
| KLHL24    | AC026470.2 | 0.488538885  | 1.12E-33  | postive  |
| IREB2     | AC026470.2 | 0.429205874  | 1.44E-25  | postive  |
| GABPB1    | AC026470.2 | 0.544852596  | 5.35E-43  | postive  |
| PIK3CA    | AC026470.2 | 0.455958043  | 4.98E-29  | postive  |
| ATG7      | AC026470.2 | 0.401377701  | 2.78E-22  | postive  |
| MAPK8     | AC026470.2 | 0.411232033  | 2.07E-23  | postive  |
| LINC00472 | AC026470.2 | 0.889429871  | 9.98E-185 | postive  |
| ATM       | AC026470.2 | 0.636744346  | 1.27E-62  | postive  |
| FBXW7     | AC026470.2 | 0.42393944   | 6.37E-25  | postive  |

|           |            |             |           |         |
|-----------|------------|-------------|-----------|---------|
| TUBE1     | AL139246.3 | 0.455180297 | 6.35E-29  | postive |
| ALOX12    | AL139246.3 | 0.477844137 | 4.26E-32  | postive |
| TAZ       | AL139246.3 | 0.48905729  | 9.32E-34  | postive |
| GABPB1    | AC034198.2 | 0.414537739 | 8.49E-24  | postive |
| LINC00472 | AC034198.2 | 0.485432956 | 3.26E-33  | postive |
| HELLS     | ADAMTS9-A  | 0.484011329 | 5.30E-33  | postive |
| TUBE1     | ADAMTS9-A  | 0.521615291 | 6.11E-39  | postive |
| ALOX12    | ADAMTS9-A  | 0.523630372 | 2.80E-39  | postive |
| IREB2     | ADAMTS9-A  | 0.461541851 | 8.62E-30  | postive |
| GABPB1    | ADAMTS9-A  | 0.526029665 | 1.10E-39  | postive |
| MAPK8     | ADAMTS9-A  | 0.51906163  | 1.63E-38  | postive |
| LINC00472 | ADAMTS9-A  | 0.494149981 | 1.57E-34  | postive |
| PRKAA2    | ADAMTS9-A  | 0.477388108 | 4.96E-32  | postive |
| ATM       | ADAMTS9-A  | 0.781427022 | 4.53E-112 | postive |
| FBXW7     | ADAMTS9-A  | 0.48438437  | 4.66E-33  | postive |
| ATP6V1G2  | LINC02365  | 0.524358385 | 2.11E-39  | postive |
| ACO1      | LINC02365  | 0.668307732 | 5.12E-71  | postive |
| GCLC      | AL161782.1 | 0.447492779 | 6.70E-28  | postive |
| TUBE1     | AL161782.1 | 0.442207238 | 3.27E-27  | postive |
| IREB2     | AL161782.1 | 0.546840075 | 2.33E-43  | postive |
| PIK3CA    | AL161782.1 | 0.434880996 | 2.82E-26  | postive |
| NCOA4     | AL161782.1 | 0.438305068 | 1.04E-26  | postive |
| SNX4      | AL161782.1 | 0.441689718 | 3.82E-27  | postive |
| MAPK1     | AL161782.1 | 0.479510714 | 2.44E-32  | postive |
| MAPK8     | AL161782.1 | 0.589732988 | 8.48E-52  | postive |
| PRKAA2    | AL161782.1 | 0.606635775 | 1.75E-55  | postive |
| PRKAA1    | AL161782.1 | 0.426186251 | 3.39E-25  | postive |
| TLR4      | AL161782.1 | 0.434274734 | 3.36E-26  | postive |
| ATM       | AL161782.1 | 0.608155445 | 7.97E-56  | postive |
| SIRT1     | AL161782.1 | 0.442478768 | 3.02E-27  | postive |
| HELLS     | AL133410.1 | 0.455570775 | 5.62E-29  | postive |
| ZNF419    | AL133410.1 | 0.52315701  | 3.36E-39  | postive |
| TUBE1     | AL133410.1 | 0.552858738 | 1.80E-44  | postive |
| DRD4      | AL133410.1 | 0.412084414 | 1.65E-23  | postive |
| ALOX12    | AL133410.1 | 0.53863235  | 7.01E-42  | postive |
| PHKG2     | AL133410.1 | 0.593913464 | 1.09E-52  | postive |
| TAZ       | AL133410.1 | 0.636279284 | 1.66E-62  | postive |
| HELLS     | AC027763.2 | 0.577951426 | 2.35E-49  | postive |
| ZNF419    | AC027763.2 | 0.424791534 | 5.02E-25  | postive |
| ALOX12    | AC027763.2 | 0.416818687 | 4.56E-24  | postive |
| GABPB1    | AC027763.2 | 0.444488393 | 1.66E-27  | postive |
| DUOX1     | AC027763.2 | 0.403265196 | 1.70E-22  | postive |
| ATG7      | AC027763.2 | 0.401690112 | 2.57E-22  | postive |
| LINC00472 | AC027763.2 | 0.439546436 | 7.19E-27  | postive |
| ATM       | AC027763.2 | 0.509774195 | 5.45E-37  | postive |
| FBXW7     | AC027763.2 | 0.463466621 | 4.68E-30  | postive |
| ZNF419    | AL645941.1 | 0.404857946 | 1.12E-22  | postive |
| TUBE1     | AL645941.1 | 0.526995721 | 7.49E-40  | postive |
| SETD1B    | AL645941.1 | 0.428078719 | 1.98E-25  | postive |
| ALOX12    | AL645941.1 | 0.591866038 | 2.99E-52  | postive |
| GABPB1    | AL645941.1 | 0.413762533 | 1.05E-23  | postive |
| ATM       | AL645941.1 | 0.591956486 | 2.86E-52  | postive |
| HELLS     | RAB30-DT   | 0.48579634  | 2.87E-33  | postive |
| TUBE1     | RAB30-DT   | 0.56276018  | 2.39E-46  | postive |
| ALOX12    | RAB30-DT   | 0.5293881   | 2.91E-40  | postive |
| GABPB1    | RAB30-DT   | 0.528474411 | 4.18E-40  | postive |
| MAPK8     | RAB30-DT   | 0.465970859 | 2.10E-30  | postive |
| LINC00472 | RAB30-DT   | 0.549877727 | 6.44E-44  | postive |

|           |            |              |           |          |
|-----------|------------|--------------|-----------|----------|
| ATM       | RAB30-DT   | 0.675390927  | 4.81E-73  | postive  |
| HELLS     | NDUFV2-AS1 | 0.491442258  | 4.06E-34  | postive  |
| ZNF419    | NDUFV2-AS1 | 0.546891114  | 2.28E-43  | postive  |
| TUBE1     | NDUFV2-AS1 | 0.529516317  | 2.77E-40  | postive  |
| ALOX12    | NDUFV2-AS1 | 0.573970028  | 1.49E-48  | postive  |
| GABPB1    | NDUFV2-AS1 | 0.602408513  | 1.53E-54  | postive  |
| LINC00472 | NDUFV2-AS1 | 0.699599851  | 2.00E-80  | postive  |
| ATM       | NDUFV2-AS1 | 0.535268666  | 2.76E-41  | postive  |
| FBXW7     | NDUFV2-AS1 | 0.491833565  | 3.54E-34  | postive  |
| HSF1      | AC084125.4 | 0.440182622  | 5.96E-27  | postive  |
| PHKG2     | AC084125.4 | 0.445073844  | 1.39E-27  | postive  |
| ATG4D     | AC084125.4 | 0.437929246  | 1.16E-26  | postive  |
| LONP1     | AC084125.4 | 0.418685276  | 2.74E-24  | postive  |
| PHKG2     | AP000238.1 | 0.539092211  | 5.81E-42  | postive  |
| TAZ       | AP000238.1 | 0.56992237   | 9.55E-48  | postive  |
| FBXW7     | AP000238.1 | 0.418212613  | 3.11E-24  | postive  |
| ALB       | AC008760.2 | 0.485525239  | 3.16E-33  | postive  |
| CDO1      | AC008760.2 | 0.42621736   | 3.36E-25  | postive  |
| HSPB1     | AC092718.3 | 0.479189686  | 2.71E-32  | postive  |
| NOX1      | AC092718.3 | 0.480794938  | 1.58E-32  | postive  |
| NCOA4     | AC092718.3 | -0.45480769  | 7.13E-29  | negative |
| PHKG2     | AC092718.3 | 0.5296244    | 2.65E-40  | postive  |
| BECN1     | AC092718.3 | -0.433773804 | 3.88E-26  | negative |
| SIRT1     | AC092718.3 | -0.439109486 | 8.18E-27  | negative |
| HELLS     | AP005329.1 | 0.424453711  | 5.51E-25  | postive  |
| ZNF419    | AP005329.1 | 0.468418834  | 9.50E-31  | postive  |
| TUBE1     | AP005329.1 | 0.49708001   | 5.54E-35  | postive  |
| ALOX12    | AP005329.1 | 0.431449325  | 7.58E-26  | postive  |
| GABPB1    | AP005329.1 | 0.458562327  | 2.21E-29  | postive  |
| PHKG2     | AP005329.1 | 0.494333985  | 1.47E-34  | postive  |
| ATM       | AP005329.1 | 0.431665273  | 7.13E-26  | postive  |
| TAZ       | AP005329.1 | 0.54805221   | 1.40E-43  | postive  |
| FBXW7     | AP005329.1 | 0.460583108  | 1.17E-29  | postive  |
| CHMP5     | COMETT     | 0.400442764  | 3.55E-22  | postive  |
| TAZ       | AP000345.2 | 0.434287535  | 3.34E-26  | postive  |
| HELLS     | NR2F2-AS1  | 0.518779125  | 1.82E-38  | postive  |
| ZNF419    | NR2F2-AS1  | 0.465751646  | 2.25E-30  | postive  |
| TUBE1     | NR2F2-AS1  | 0.591653075  | 3.32E-52  | postive  |
| ALOX12    | NR2F2-AS1  | 0.596589275  | 2.89E-53  | postive  |
| GABPB1    | NR2F2-AS1  | 0.613238481  | 5.54E-57  | postive  |
| ZEB1      | NR2F2-AS1  | 0.421294506  | 1.33E-24  | postive  |
| MAPK8     | NR2F2-AS1  | 0.531643203  | 1.19E-40  | postive  |
| LINC00472 | NR2F2-AS1  | 0.613715402  | 4.30E-57  | postive  |
| ATM       | NR2F2-AS1  | 0.771258326  | 1.98E-107 | postive  |
| FBXW7     | NR2F2-AS1  | 0.575966292  | 5.93E-49  | postive  |
| TUBE1     | AC090246.1 | 0.408384384  | 4.43E-23  | postive  |
| ATM       | AC090246.1 | 0.410718525  | 2.38E-23  | postive  |
| HELLS     | AL355916.2 | 0.466630342  | 1.69E-30  | postive  |
| KLHL24    | AL355916.2 | 0.442603567  | 2.91E-27  | postive  |
| TUBE1     | AL355916.2 | 0.471789856  | 3.17E-31  | postive  |
| ALOX12    | AL355916.2 | 0.452298298  | 1.55E-28  | postive  |
| IREB2     | AL355916.2 | 0.49555592   | 9.53E-35  | postive  |
| GABPB1    | AL355916.2 | 0.608650378  | 6.16E-56  | postive  |
| PIK3CA    | AL355916.2 | 0.470605754  | 4.66E-31  | postive  |
| ATG7      | AL355916.2 | 0.435024271  | 2.70E-26  | postive  |
| MAPK8     | AL355916.2 | 0.499410622  | 2.41E-35  | postive  |
| LINC00472 | AL355916.2 | 0.787633461  | 5.00E-115 | postive  |
| ATM       | AL355916.2 | 0.742070626  | 2.40E-95  | postive  |



|           |            |              |          |          |
|-----------|------------|--------------|----------|----------|
| FBXW7     | AL355916.2 | 0.538272888  | 8.12E-42 | postive  |
| LINC00472 | AC007014.2 | 0.583547413  | 1.67E-50 | postive  |
| ACSL4     | AC091563.1 | 0.427682672  | 2.22E-25 | postive  |
| HIC1      | AC147067.2 | 0.437632084  | 1.26E-26 | postive  |
| EPAS1     | AC147067.2 | 0.401944152  | 2.40E-22 | postive  |
| ATM       | AL132657.1 | 0.50140592   | 1.17E-35 | postive  |
| BRD4      | AP001160.1 | 0.441793756  | 3.70E-27 | postive  |
| ZNF419    | AP001160.1 | 0.486186     | 2.51E-33 | postive  |
| TUBE1     | AP001160.1 | 0.467378821  | 1.33E-30 | postive  |
| DRD4      | AP001160.1 | 0.478428278  | 3.50E-32 | postive  |
| ALOX12    | AP001160.1 | 0.527875606  | 5.30E-40 | postive  |
| SCP2      | AP001160.1 | -0.423161851 | 7.91E-25 | negative |
| NCOA4     | AP001160.1 | -0.472755505 | 2.31E-31 | negative |
| PHKG2     | AP001160.1 | 0.620544392  | 1.10E-58 | postive  |
| EGLN2     | AP001160.1 | 0.44791708   | 5.89E-28 | postive  |
| TAZ       | AP001160.1 | 0.747525141  | 1.77E-97 | postive  |
| ARNTL     | CRYZL2P-SE | 0.405210339  | 1.02E-22 | postive  |
| ZNF419    | CRYZL2P-SE | 0.436376847  | 1.82E-26 | postive  |
| VEGFA     | CRYZL2P-SE | 0.468580272  | 9.02E-31 | postive  |
| TUBE1     | CRYZL2P-SE | 0.684428552  | 1.03E-75 | postive  |
| SETD1B    | CRYZL2P-SE | 0.416410121  | 5.10E-24 | postive  |
| ALOX12    | CRYZL2P-SE | 0.690232136  | 1.75E-77 | postive  |
| SP1       | CRYZL2P-SE | 0.404458917  | 1.25E-22 | postive  |
| GABPB1    | CRYZL2P-SE | 0.412883799  | 1.33E-23 | postive  |
| MAPK8     | CRYZL2P-SE | 0.516729474  | 3.98E-38 | postive  |
| ATM       | CRYZL2P-SE | 0.720698081  | 1.72E-87 | postive  |
| YY1AP1    | CRYZL2P-SE | 0.431145688  | 8.27E-26 | postive  |
| FBXW7     | CRYZL2P-SE | 0.424126665  | 6.04E-25 | postive  |
| ACVR1B    | C8orf31    | 0.411782004  | 1.79E-23 | postive  |
| VEGFA     | PHKA2-AS1  | 0.490401026  | 5.84E-34 | postive  |
| ALOX12    | PHKA2-AS1  | 0.429812051  | 1.21E-25 | postive  |
| TAZ       | PHKA2-AS1  | 0.525679217  | 1.26E-39 | postive  |
| HELLS     | GAS8-AS1   | 0.462601914  | 6.16E-30 | postive  |
| ZNF419    | GAS8-AS1   | 0.504223702  | 4.21E-36 | postive  |
| TUBE1     | GAS8-AS1   | 0.542576488  | 1.38E-42 | postive  |
| ALOX12    | GAS8-AS1   | 0.692857334  | 2.70E-78 | postive  |
| GABPB1    | GAS8-AS1   | 0.413363289  | 1.17E-23 | postive  |
| ATM       | GAS8-AS1   | 0.509695787  | 5.61E-37 | postive  |
| FBXW7     | GAS8-AS1   | 0.43770195   | 1.24E-26 | postive  |
| NOX1      | AC100814.1 | 0.637776328  | 6.98E-63 | postive  |
| BECN1     | AC100814.1 | -0.469427616 | 6.85E-31 | negative |
| VEGFA     | AC024909.1 | 0.412598796  | 1.43E-23 | postive  |
| ZEB1      | AC024909.1 | 0.450470981  | 2.71E-28 | postive  |
| HELLS     | MORF4L2-AS | 0.444496977  | 1.65E-27 | postive  |
| ZNF419    | MORF4L2-AS | 0.561356592  | 4.45E-46 | postive  |
| TUBE1     | MORF4L2-AS | 0.538541955  | 7.28E-42 | postive  |
| ALOX12    | MORF4L2-AS | 0.690027194  | 2.03E-77 | postive  |
| GABPB1    | MORF4L2-AS | 0.45076126   | 2.48E-28 | postive  |
| DUOX1     | MORF4L2-AS | 0.406955521  | 6.46E-23 | postive  |
| LINC00472 | MORF4L2-AS | 0.41547741   | 6.58E-24 | postive  |
| ATM       | MORF4L2-AS | 0.459754674  | 1.52E-29 | postive  |
| HELLS     | AC019080.5 | 0.534679585  | 3.50E-41 | postive  |
| TUBE1     | AC019080.5 | 0.473680318  | 1.70E-31 | postive  |
| GABPB1    | AC019080.5 | 0.442195216  | 3.28E-27 | postive  |
| LINC00472 | AC019080.5 | 0.501971244  | 9.55E-36 | postive  |
| ATM       | AC019080.5 | 0.637546336  | 7.97E-63 | postive  |
| HELLS     | ITPRIP-AS1 | 0.512650556  | 1.86E-37 | postive  |
| TUBE1     | ITPRIP-AS1 | 0.440088693  | 6.13E-27 | postive  |

|           |             |             |           |         |
|-----------|-------------|-------------|-----------|---------|
| ALOX12    | ITPRIP-AS1  | 0.407681887 | 5.33E-23  | postive |
| IREB2     | ITPRIP-AS1  | 0.401623102 | 2.61E-22  | postive |
| GABPB1    | ITPRIP-AS1  | 0.567546749 | 2.80E-47  | postive |
| PIK3CA    | ITPRIP-AS1  | 0.414220415 | 9.25E-24  | postive |
| ATG7      | ITPRIP-AS1  | 0.433942247 | 3.70E-26  | postive |
| MAPK8     | ITPRIP-AS1  | 0.444549811 | 1.63E-27  | postive |
| LINC00472 | ITPRIP-AS1  | 0.752484716 | 1.83E-99  | postive |
| ATM       | ITPRIP-AS1  | 0.719132617 | 6.06E-87  | postive |
| FBXW7     | ITPRIP-AS1  | 0.487971468 | 1.36E-33  | postive |
| ANGPTL7   | MAP3K4-AS1  | 0.410781331 | 2.34E-23  | postive |
| CDKN2A    | MAP3K4-AS1  | 0.48446017  | 4.54E-33  | postive |
| IL6       | AC015819.1  | 0.404310205 | 1.30E-22  | postive |
| TFAP2C    | AL391832.2  | 0.536036096 | 2.02E-41  | postive |
| HBA1      | AL391832.2  | 0.540810512 | 2.87E-42  | postive |
| HELLS     | AC068790.7  | 0.54030015  | 3.54E-42  | postive |
| TUBE1     | AC068790.7  | 0.480691886 | 1.64E-32  | postive |
| ALOX12    | AC068790.7  | 0.472856391 | 2.23E-31  | postive |
| GABPB1    | AC068790.7  | 0.560583699 | 6.25E-46  | postive |
| ATG7      | AC068790.7  | 0.401479198 | 2.71E-22  | postive |
| MAPK8     | AC068790.7  | 0.413476068 | 1.13E-23  | postive |
| LINC00472 | AC068790.7  | 0.667529402 | 8.49E-71  | postive |
| ATM       | AC068790.7  | 0.747676628 | 1.54E-97  | postive |
| FBXW7     | AC068790.7  | 0.495869463 | 8.53E-35  | postive |
| HSPB1     | GS1-124K5.4 | 0.485889833 | 2.78E-33  | postive |
| PHKG2     | GS1-124K5.4 | 0.468535203 | 9.15E-31  | postive |
| TAZ       | GS1-124K5.4 | 0.417677803 | 3.61E-24  | postive |
| SETD1B    | ADAMTSL4-1  | 0.42606053  | 3.51E-25  | postive |
| ALOX12    | ADAMTSL4-1  | 0.480657963 | 1.65E-32  | postive |
| KLHL24    | FAM198B-AS1 | 0.578144921 | 2.15E-49  | postive |
| IREB2     | FAM198B-AS1 | 0.431253408 | 8.02E-26  | postive |
| PIK3CA    | FAM198B-AS1 | 0.484643883 | 4.27E-33  | postive |
| KRAS      | FAM198B-AS1 | 0.452556532 | 1.43E-28  | postive |
| LINC00472 | FAM198B-AS1 | 0.808250486 | 1.31E-125 | postive |
| PRKAA1    | FAM198B-AS1 | 0.409806127 | 3.03E-23  | postive |
| LPIN1     | FAM198B-AS1 | 0.50790022  | 1.09E-36  | postive |
| ZNF419    | AL122125.1  | 0.531722897 | 1.15E-40  | postive |
| TUBE1     | AL122125.1  | 0.423222346 | 7.78E-25  | postive |
| ALOX12    | AL122125.1  | 0.492929322 | 2.41E-34  | postive |
| TAZ       | AL122125.1  | 0.592708596 | 1.98E-52  | postive |
| FH        | Z99572.1    | 0.407665286 | 5.36E-23  | postive |
| ISCU      | Z99572.1    | 0.519179675 | 1.56E-38  | postive |
| HERPUD1   | Z99572.1    | 0.438194735 | 1.07E-26  | postive |
| KLHL24    | Z99572.1    | 0.425845902 | 3.73E-25  | postive |
| SLC2A12   | Z99572.1    | 0.493203199 | 2.19E-34  | postive |
| CS        | Z99572.1    | 0.500640258 | 1.55E-35  | postive |
| GOT1      | Z99572.1    | 0.452453623 | 1.47E-28  | postive |
| GABARAPL1 | Z99572.1    | 0.713895729 | 3.84E-85  | postive |
| WIP1      | Z99572.1    | 0.454629141 | 7.53E-29  | postive |
| BAP1      | Z99572.1    | 0.489688449 | 7.49E-34  | postive |
| LPIN1     | Z99572.1    | 0.524353087 | 2.11E-39  | postive |
| VEGFA     | ERVK9-11    | 0.429936524 | 1.17E-25  | postive |
| TUBE1     | ERVK9-11    | 0.465505411 | 2.43E-30  | postive |
| ALOX12    | ERVK9-11    | 0.458097448 | 2.55E-29  | postive |
| TAZ       | ERVK9-11    | 0.417431716 | 3.86E-24  | postive |
| HBA1      | AC011472.2  | 0.496064611 | 7.95E-35  | postive |
| HELLS     | PSPC1-AS2   | 0.532385128 | 8.81E-41  | postive |
| ZNF419    | PSPC1-AS2   | 0.508668625 | 8.21E-37  | postive |
| TUBE1     | PSPC1-AS2   | 0.637348274 | 8.93E-63  | postive |

|           |            |              |          |          |
|-----------|------------|--------------|----------|----------|
| ALOX12    | PSPC1-AS2  | 0.55177615   | 2.87E-44 | postive  |
| GABPB1    | PSPC1-AS2  | 0.606032447  | 2.39E-55 | postive  |
| LINC00472 | PSPC1-AS2  | 0.589441236  | 9.78E-52 | postive  |
| ATM       | PSPC1-AS2  | 0.650999111  | 2.73E-66 | postive  |
| TAZ       | PSPC1-AS2  | 0.412228768  | 1.58E-23 | postive  |
| FBXW7     | PSPC1-AS2  | 0.56919744   | 1.33E-47 | postive  |
| FANCD2    | C10orf55   | 0.45167956   | 1.87E-28 | postive  |
| AURKA     | C10orf55   | 0.417258251  | 4.05E-24 | postive  |
| GPX4      | AP001505.1 | 0.404051924  | 1.39E-22 | postive  |
| HSPB1     | AP001505.1 | 0.566327564  | 4.85E-47 | postive  |
| IREB2     | AP001505.1 | -0.449871237 | 3.25E-28 | negative |
| HBA1      | AP001505.1 | 0.410785388  | 2.33E-23 | postive  |
| HRAS      | AP001505.1 | 0.720374049  | 2.23E-87 | postive  |
| NCOA4     | AP001505.1 | -0.457669036 | 2.92E-29 | negative |
| PHKG2     | AP001505.1 | 0.471835327  | 3.12E-31 | postive  |
| BECN1     | AP001505.1 | -0.425580733 | 4.02E-25 | negative |
| MAP1LC3A  | AP001505.1 | 0.410149032  | 2.77E-23 | postive  |
| PRKAA1    | AP001505.1 | -0.405218079 | 1.02E-22 | negative |
| EGLN2     | AP001505.1 | 0.68750293   | 1.20E-76 | postive  |
| ISCU      | AC016705.2 | 0.403646216  | 1.54E-22 | postive  |
| CS        | AC016705.2 | 0.446654932  | 8.63E-28 | postive  |
| GABARAPL1 | AC016705.2 | 0.499212606  | 2.58E-35 | postive  |
| LPIN1     | AC016705.2 | 0.402651215  | 2.00E-22 | postive  |
| HELLS     | AL008721.2 | 0.59838224   | 1.18E-53 | postive  |
| ZNF419    | AL008721.2 | 0.44742061   | 6.85E-28 | postive  |
| TUBE1     | AL008721.2 | 0.468587073  | 9.00E-31 | postive  |
| ALOX12    | AL008721.2 | 0.514332148  | 9.88E-38 | postive  |
| GABPB1    | AL008721.2 | 0.512800073  | 1.76E-37 | postive  |
| LINC00472 | AL008721.2 | 0.518915662  | 1.73E-38 | postive  |
| ATM       | AL008721.2 | 0.61839309   | 3.53E-58 | postive  |
| FBXW7     | AL008721.2 | 0.499660299  | 2.20E-35 | postive  |
| SOCS1     | BX470102.1 | 0.440358752  | 5.66E-27 | postive  |
| ISCU      | AC103563.2 | 0.434375142  | 3.26E-26 | postive  |
| KLHL24    | AC103563.2 | 0.566892144  | 3.76E-47 | postive  |
| SLC2A12   | AC103563.2 | 0.409267741  | 3.50E-23 | postive  |
| ATG4D     | AC103563.2 | 0.407773459  | 5.21E-23 | postive  |
| GABARAPL1 | AC103563.2 | 0.613152305  | 5.80E-57 | postive  |
| WIP1      | AC103563.2 | 0.45960356   | 1.59E-29 | postive  |
| LINC00472 | AC103563.2 | 0.609013749  | 5.10E-56 | postive  |
| LPIN1     | AC103563.2 | 0.602794885  | 1.26E-54 | postive  |
| SETD1B    | AL596244.1 | 0.425914669  | 3.66E-25 | postive  |
| PHKG2     | AC092809.4 | 0.579156081  | 1.34E-49 | postive  |
| TAZ       | AC092809.4 | 0.601211085  | 2.82E-54 | postive  |
| PML       | U62317.1   | 0.400882296  | 3.17E-22 | postive  |
| DRD4      | U62317.1   | 0.427331669  | 2.45E-25 | postive  |
| NCOA4     | U62317.1   | -0.431682162 | 7.09E-26 | negative |
| PHKG2     | U62317.1   | 0.657842571  | 4.02E-68 | postive  |
| TAZ       | U62317.1   | 0.712779137  | 9.18E-85 | postive  |
| KLHL24    | AC010333.1 | 0.42538557   | 4.24E-25 | postive  |
| GABPB1    | AC010333.1 | 0.409449588  | 3.33E-23 | postive  |
| LINC00472 | AC010333.1 | 0.624015624  | 1.65E-59 | postive  |
| LPIN1     | AC010333.1 | 0.435604451  | 2.28E-26 | postive  |
| ATM       | AC010333.1 | 0.581371427  | 4.70E-50 | postive  |
| ISCU      | UBA6-AS1   | 0.4610584    | 1.01E-29 | postive  |
| ATG4D     | UBA6-AS1   | 0.453646212  | 1.02E-28 | postive  |
| HELLS     | AL442125.2 | 0.523204926  | 3.30E-39 | postive  |
| ZNF419    | AL442125.2 | 0.424265862  | 5.81E-25 | postive  |
| TUBE1     | AL442125.2 | 0.498276554  | 3.61E-35 | postive  |

|           |            |             |          |         |
|-----------|------------|-------------|----------|---------|
| ALOX12    | AL442125.2 | 0.47457283  | 1.27E-31 | postive |
| IREB2     | AL442125.2 | 0.41539759  | 6.72E-24 | postive |
| GABPB1    | AL442125.2 | 0.56310383  | 2.05E-46 | postive |
| ATG7      | AL442125.2 | 0.400789757 | 3.24E-22 | postive |
| MAPK8     | AL442125.2 | 0.434418358 | 3.22E-26 | postive |
| LINC00472 | AL442125.2 | 0.64359555  | 2.32E-64 | postive |
| ATM       | AL442125.2 | 0.687610735 | 1.11E-76 | postive |
| FBXW7     | AL442125.2 | 0.484884105 | 3.93E-33 | postive |
| BRD4      | AC020907.4 | 0.483189309 | 7.01E-33 | postive |
| ZNF419    | AC020907.4 | 0.536873785 | 1.44E-41 | postive |
| VEGFA     | AC020907.4 | 0.511936567 | 2.43E-37 | postive |
| TUBE1     | AC020907.4 | 0.487181003 | 1.78E-33 | postive |
| SETD1B    | AC020907.4 | 0.478502088 | 3.42E-32 | postive |
| DRD4      | AC020907.4 | 0.434252408 | 3.38E-26 | postive |
| ALOX12    | AC020907.4 | 0.57733276  | 3.14E-49 | postive |
| PHKG2     | AC020907.4 | 0.518025074 | 2.43E-38 | postive |
| TAZ       | AC020907.4 | 0.676620673 | 2.11E-73 | postive |
| TUBE1     | AC092747.4 | 0.516299055 | 4.69E-38 | postive |
| HMGB1     | AC092747.4 | 0.444522765 | 1.64E-27 | postive |
| GABPB1    | AC092747.4 | 0.441420818 | 4.13E-27 | postive |
| NOX1      | AC092747.4 | 0.470939997 | 4.18E-31 | postive |
| MAPK8     | AC092747.4 | 0.427804774 | 2.14E-25 | postive |
| HELLS     | AC027801.1 | 0.475623576 | 8.93E-32 | postive |
| ZNF419    | AC027801.1 | 0.46037449  | 1.25E-29 | postive |
| TUBE1     | AC027801.1 | 0.502377331 | 8.25E-36 | postive |
| ALOX12    | AC027801.1 | 0.526470029 | 9.21E-40 | postive |
| GABPB1    | AC027801.1 | 0.458707813 | 2.11E-29 | postive |
| LINC00472 | AC027801.1 | 0.477734343 | 4.42E-32 | postive |
| ATM       | AC027801.1 | 0.517123687 | 3.43E-38 | postive |
| TAZ       | AC027801.1 | 0.434951371 | 2.76E-26 | postive |
| FBXW7     | AC027801.1 | 0.472336379 | 2.65E-31 | postive |
| RB1       | AC008669.1 | 0.435888231 | 2.10E-26 | postive |
| TMBIM4    | AC008669.1 | 0.474398632 | 1.34E-31 | postive |
| CHMP5     | AC008669.1 | 0.441110719 | 4.53E-27 | postive |
| KLHL24    | AC008669.1 | 0.474292524 | 1.39E-31 | postive |
| IREB2     | AC008669.1 | 0.462326608 | 6.72E-30 | postive |
| EMC2      | AC008669.1 | 0.492155997 | 3.16E-34 | postive |
| PIK3CA    | AC008669.1 | 0.444272856 | 1.77E-27 | postive |
| SCP2      | AC008669.1 | 0.41694944  | 4.40E-24 | postive |
| KRAS      | AC008669.1 | 0.529743945 | 2.53E-40 | postive |
| GABARAPL2 | AC008669.1 | 0.447906474 | 5.91E-28 | postive |
| MAPK8     | AC008669.1 | 0.497982755 | 4.01E-35 | postive |
| MAPK9     | AC008669.1 | 0.436768564 | 1.63E-26 | postive |
| LINC00472 | AC008669.1 | 0.471669549 | 3.29E-31 | postive |
| PRKAA2    | AC008669.1 | 0.571085768 | 5.62E-48 | postive |
| PRKAA1    | AC008669.1 | 0.565890708 | 5.90E-47 | postive |
| ZNF419    | KLF3-AS1   | 0.534734034 | 3.42E-41 | postive |
| VEGFA     | KLF3-AS1   | 0.561142207 | 4.89E-46 | postive |
| TUBE1     | KLF3-AS1   | 0.633052279 | 1.05E-61 | postive |
| SETD1B    | KLF3-AS1   | 0.468412646 | 9.52E-31 | postive |
| ALOX12    | KLF3-AS1   | 0.620363931 | 1.21E-58 | postive |
| GABPB1    | KLF3-AS1   | 0.405507924 | 9.47E-23 | postive |
| MAPK8     | KLF3-AS1   | 0.418152338 | 3.17E-24 | postive |
| ATM       | KLF3-AS1   | 0.481696161 | 1.16E-32 | postive |
| IFNG      | LINC01232  | 0.426937317 | 2.74E-25 | postive |
| IDH1      | LINC01232  | 0.439224226 | 7.91E-27 | postive |
| TFAP2C    | LINC02356  | 0.561674105 | 3.86E-46 | postive |
| HBA1      | LINC02356  | 0.57027417  | 8.13E-48 | postive |

|           |            |             |          |         |
|-----------|------------|-------------|----------|---------|
| HELLS     | LINC02328  | 0.407125952 | 6.18E-23 | postive |
| ATM       | LINC02328  | 0.407703617 | 5.30E-23 | postive |
| ALOX12    | AC136475.1 | 0.438663474 | 9.33E-27 | postive |
| TAZ       | AC136475.1 | 0.447717283 | 6.26E-28 | postive |
| VEGFA     | LINC00294  | 0.409487252 | 3.30E-23 | postive |
| ALOX12    | LINC00294  | 0.414509071 | 8.56E-24 | postive |
| HELLS     | AC005104.1 | 0.419549173 | 2.16E-24 | postive |
| BRD4      | AC005104.1 | 0.422686913 | 9.03E-25 | postive |
| ZNF419    | AC005104.1 | 0.524216556 | 2.23E-39 | postive |
| VEGFA     | AC005104.1 | 0.505167753 | 2.98E-36 | postive |
| TUBE1     | AC005104.1 | 0.648137885 | 1.54E-65 | postive |
| SETD1B    | AC005104.1 | 0.514283104 | 1.01E-37 | postive |
| ALOX12    | AC005104.1 | 0.674762953 | 7.31E-73 | postive |
| GABPB1    | AC005104.1 | 0.481295752 | 1.33E-32 | postive |
| ATM       | AC005104.1 | 0.537757609 | 1.00E-41 | postive |
| YY1AP1    | AC005104.1 | 0.443846086 | 2.01E-27 | postive |
| TAZ       | AC005104.1 | 0.500296878 | 1.75E-35 | postive |
| FBXW7     | AC005104.1 | 0.475493167 | 9.33E-32 | postive |
| SLC3A2    | CEROX1     | 0.43853082  | 9.70E-27 | postive |
| ISCU      | CEROX1     | 0.485844822 | 2.83E-33 | postive |
| CHAC1     | CEROX1     | 0.436869114 | 1.58E-26 | postive |
| DDIT3     | CEROX1     | 0.480051194 | 2.03E-32 | postive |
| SLC2A12   | CEROX1     | 0.431161732 | 8.23E-26 | postive |
| PLIN4     | CEROX1     | 0.404605938 | 1.20E-22 | postive |
| GOT1      | CEROX1     | 0.425269254 | 4.39E-25 | postive |
| WIP1      | CEROX1     | 0.510829545 | 3.68E-37 | postive |
| ALOX12    | AC104825.1 | 0.418648405 | 2.76E-24 | postive |
| VDAC2     | ZNF503-AS2 | 0.435552192 | 2.32E-26 | postive |
| ISCU      | ZNF503-AS2 | 0.621251527 | 7.49E-59 | postive |
| OTUB1     | ZNF503-AS2 | 0.41755734  | 3.73E-24 | postive |
| TMBIM4    | ZNF503-AS2 | 0.442394636 | 3.09E-27 | postive |
| CHMP5     | ZNF503-AS2 | 0.427044685 | 2.66E-25 | postive |
| DDIT3     | ZNF503-AS2 | 0.432216565 | 6.08E-26 | postive |
| ATP5MC3   | ZNF503-AS2 | 0.451464098 | 2.00E-28 | postive |
| GOT1      | ZNF503-AS2 | 0.506423584 | 1.88E-36 | postive |
| ATG4D     | ZNF503-AS2 | 0.512510408 | 1.96E-37 | postive |
| MAP1LC3A  | ZNF503-AS2 | 0.419002815 | 2.51E-24 | postive |
| GABARAPL2 | ZNF503-AS2 | 0.584402123 | 1.11E-50 | postive |
| BAP1      | ZNF503-AS2 | 0.400031034 | 3.95E-22 | postive |
| HELLS     | AC004471.1 | 0.400638226 | 3.37E-22 | postive |
| RPL8      | PIK3CD-AS2 | 0.417259783 | 4.04E-24 | postive |
| HRAS      | PIK3CD-AS2 | 0.434758256 | 2.92E-26 | postive |
| ZNF419    | AC105345.1 | 0.541751479 | 1.94E-42 | postive |
| VEGFA     | AC105345.1 | 0.560329947 | 6.99E-46 | postive |
| TUBE1     | AC105345.1 | 0.446939382 | 7.92E-28 | postive |
| SETD1B    | AC105345.1 | 0.466147258 | 1.98E-30 | postive |
| ALOX12    | AC105345.1 | 0.5394635   | 4.99E-42 | postive |
| ULK1      | AC105345.1 | 0.408850394 | 3.91E-23 | postive |
| TAZ       | AC105345.1 | 0.490757073 | 5.16E-34 | postive |
| RB1       | WDFY3-AS2  | 0.539979777 | 4.03E-42 | postive |
| GCLC      | WDFY3-AS2  | 0.407072795 | 6.27E-23 | postive |
| CISD2     | WDFY3-AS2  | 0.542057289 | 1.71E-42 | postive |
| CHMP5     | WDFY3-AS2  | 0.459550314 | 1.62E-29 | postive |
| BNIP3     | WDFY3-AS2  | 0.402487105 | 2.09E-22 | postive |
| HSD17B11  | WDFY3-AS2  | 0.498199415 | 3.72E-35 | postive |
| IREB2     | WDFY3-AS2  | 0.430982109 | 8.67E-26 | postive |
| EMC2      | WDFY3-AS2  | 0.429707992 | 1.25E-25 | postive |
| SCP2      | WDFY3-AS2  | 0.566467194 | 4.56E-47 | postive |

|           |            |              |           |          |
|-----------|------------|--------------|-----------|----------|
| NRAS      | WDFY3-AS2  | 0.502513548  | 7.85E-36  | postive  |
| KRAS      | WDFY3-AS2  | 0.407781219  | 5.19E-23  | postive  |
| CARS1     | WDFY3-AS2  | -0.411650331 | 1.85E-23  | negative |
| NCOA4     | WDFY3-AS2  | 0.491067634  | 4.63E-34  | postive  |
| SNX4      | WDFY3-AS2  | 0.616450423  | 1.00E-57  | postive  |
| MAPK1     | WDFY3-AS2  | 0.586807602  | 3.50E-51  | postive  |
| MAPK8     | WDFY3-AS2  | 0.5075038    | 1.26E-36  | postive  |
| PRKAA2    | WDFY3-AS2  | 0.610210675  | 2.73E-56  | postive  |
| PRKAA1    | WDFY3-AS2  | 0.413709002  | 1.06E-23  | postive  |
| SIRT1     | WDFY3-AS2  | 0.496838133  | 6.04E-35  | postive  |
| HELLS     | NPTN-IT1   | 0.408150799  | 4.71E-23  | postive  |
| ZNF419    | NPTN-IT1   | 0.455829042  | 5.19E-29  | postive  |
| KLHL24    | NPTN-IT1   | 0.56682905   | 3.87E-47  | postive  |
| TUBE1     | NPTN-IT1   | 0.456116749  | 4.74E-29  | postive  |
| ALOX12    | NPTN-IT1   | 0.445202009  | 1.34E-27  | postive  |
| IREB2     | NPTN-IT1   | 0.528972319  | 3.43E-40  | postive  |
| GABPB1    | NPTN-IT1   | 0.573547371  | 1.82E-48  | postive  |
| PIK3CA    | NPTN-IT1   | 0.523866202  | 2.55E-39  | postive  |
| KRAS      | NPTN-IT1   | 0.433746293  | 3.91E-26  | postive  |
| MAPK8     | NPTN-IT1   | 0.513314215  | 1.45E-37  | postive  |
| LINC00472 | NPTN-IT1   | 0.897866609  | 1.82E-193 | postive  |
| PRKAA1    | NPTN-IT1   | 0.420665572  | 1.58E-24  | postive  |
| LPIN1     | NPTN-IT1   | 0.426719007  | 2.91E-25  | postive  |
| ATM       | NPTN-IT1   | 0.632472258  | 1.46E-61  | postive  |
| FBXW7     | NPTN-IT1   | 0.467974654  | 1.10E-30  | postive  |
| TUBE1     | AL035701.1 | 0.451475401  | 1.99E-28  | postive  |
| TUBE1     | AC010538.1 | 0.42215033   | 1.05E-24  | postive  |
| ALOX12    | AC010538.1 | 0.583549388  | 1.67E-50  | postive  |
| PHKG2     | AC010538.1 | 0.449515     | 3.63E-28  | postive  |
| TAZ       | AC010538.1 | 0.426622557  | 3.00E-25  | postive  |
| TFAP2C    | AC024941.2 | 0.45674362   | 3.90E-29  | postive  |
| ZNF419    | AL050341.2 | 0.467334071  | 1.35E-30  | postive  |
| TUBE1     | AL050341.2 | 0.513577672  | 1.31E-37  | postive  |
| GABPB1    | AL050341.2 | 0.462400275  | 6.57E-30  | postive  |
| TAZ       | AL050341.2 | 0.452841524  | 1.31E-28  | postive  |
| HELLS     | NARF-IT1   | 0.49071172   | 5.24E-34  | postive  |
| BRD4      | NARF-IT1   | 0.446672224  | 8.59E-28  | postive  |
| ZNF419    | NARF-IT1   | 0.536284642  | 1.83E-41  | postive  |
| VEGFA     | NARF-IT1   | 0.483548338  | 6.20E-33  | postive  |
| TUBE1     | NARF-IT1   | 0.603464431  | 8.95E-55  | postive  |
| SETD1B    | NARF-IT1   | 0.504677045  | 3.57E-36  | postive  |
| ALOX12    | NARF-IT1   | 0.709710177  | 9.88E-84  | postive  |
| GABPB1    | NARF-IT1   | 0.510129931  | 4.77E-37  | postive  |
| ATM       | NARF-IT1   | 0.60842199   | 6.94E-56  | postive  |
| YY1AP1    | NARF-IT1   | 0.423510316  | 7.18E-25  | postive  |
| TAZ       | NARF-IT1   | 0.42897093   | 1.54E-25  | postive  |
| FBXW7     | NARF-IT1   | 0.519132014  | 1.59E-38  | postive  |
| ZNF419    | AL133215.1 | 0.465632747  | 2.34E-30  | postive  |
| VEGFA     | AL133215.1 | 0.404653011  | 1.19E-22  | postive  |
| TUBE1     | AL133215.1 | 0.500559431  | 1.59E-35  | postive  |
| SETD1B    | AL133215.1 | 0.503701068  | 5.10E-36  | postive  |
| ALOX12    | AL133215.1 | 0.606521018  | 1.86E-55  | postive  |
| TAZ       | AL133215.1 | 0.483546788  | 6.21E-33  | postive  |
| OTUB1     | AC025181.2 | 0.416184003  | 5.43E-24  | postive  |
| SLC2A8    | AC025181.2 | 0.484673136  | 4.22E-33  | postive  |
| VEGFA     | AL391845.2 | 0.415548115  | 6.45E-24  | postive  |
| HIC1      | AL391845.2 | 0.437526446  | 1.30E-26  | postive  |
| ZEB1      | AL391845.2 | 0.61008351   | 2.92E-56  | postive  |

|                |            |              |           |          |
|----------------|------------|--------------|-----------|----------|
| EPAS1          | AL391845.2 | 0.508491427  | 8.77E-37  | postive  |
| HSPB1          | AC046143.2 | 0.532015397  | 1.02E-40  | postive  |
| SLC2A6         | AC046143.2 | 0.402604935  | 2.02E-22  | postive  |
| HBA1           | AC046143.2 | 0.415042081  | 7.40E-24  | postive  |
| NOX1           | AC046143.2 | 0.405600707  | 9.24E-23  | postive  |
| HRAS           | AC046143.2 | 0.543577921  | 9.11E-43  | postive  |
| NCOA4          | AC046143.2 | -0.471297199 | 3.72E-31  | negative |
| PHKG2          | AC046143.2 | 0.514158843  | 1.05E-37  | postive  |
| MAPK1          | AC046143.2 | -0.425922851 | 3.65E-25  | negative |
| EGLN2          | AC046143.2 | 0.527706509  | 5.66E-40  | postive  |
| TAZ            | AC046143.2 | 0.432919665  | 4.97E-26  | postive  |
| NCOA4          | U47924.2   | -0.417350144 | 3.95E-24  | negative |
| PHKG2          | U47924.2   | 0.481802442  | 1.12E-32  | postive  |
| TAZ            | U47924.2   | 0.468999752  | 7.87E-31  | postive  |
| SLC3A2         | SLC25A5-AS | 0.462868807  | 5.66E-30  | postive  |
| FH             | SLC25A5-AS | 0.509590284  | 5.83E-37  | postive  |
| ISCU           | SLC25A5-AS | 0.703664509  | 9.75E-82  | postive  |
| ACSL3          | SLC25A5-AS | 0.428677902  | 1.67E-25  | postive  |
| DDIT3          | SLC25A5-AS | 0.429691243  | 1.25E-25  | postive  |
| KLHL24         | SLC25A5-AS | 0.465371667  | 2.54E-30  | postive  |
| SLC2A12        | SLC25A5-AS | 0.431667098  | 7.12E-26  | postive  |
| CS             | SLC25A5-AS | 0.409700269  | 3.12E-23  | postive  |
| GOT1           | SLC25A5-AS | 0.541195343  | 2.45E-42  | postive  |
| ATG4D          | SLC25A5-AS | 0.616843629  | 8.11E-58  | postive  |
| GABARAPL2      | SLC25A5-AS | 0.485367721  | 3.33E-33  | postive  |
| GABARAPL1      | SLC25A5-AS | 0.676225462  | 2.75E-73  | postive  |
| WIPI2          | SLC25A5-AS | 0.575089401  | 8.91E-49  | postive  |
| LINC00472      | SLC25A5-AS | 0.434721451  | 2.95E-26  | postive  |
| BAP1           | SLC25A5-AS | 0.426397548  | 3.19E-25  | postive  |
| LPIN1          | SLC25A5-AS | 0.59823496   | 1.27E-53  | postive  |
| SLC1A4         | AL158206.1 | 0.424266884  | 5.81E-25  | postive  |
| BLOC1S5-TXNDC5 | AL158206.1 | 0.419109839  | 2.43E-24  | postive  |
| HMGB1          | AL158206.1 | 0.448604308  | 4.78E-28  | postive  |
| ZEB1           | AL158206.1 | 0.460268778  | 1.29E-29  | postive  |
| MAPK8          | AL158206.1 | 0.410713954  | 2.38E-23  | postive  |
| SRC            | AC018653.3 | 0.424080301  | 6.12E-25  | postive  |
| SETD1B         | AC018653.3 | 0.482191025  | 9.84E-33  | postive  |
| ALOX12         | AC018653.3 | 0.600249502  | 4.59E-54  | postive  |
| PHKG2          | AC018653.3 | 0.527562     | 5.99E-40  | postive  |
| TAZ            | AC018653.3 | 0.549310491  | 8.19E-44  | postive  |
| HELLS          | AP001429.1 | 0.401495643  | 2.70E-22  | postive  |
| KLHL24         | AP001429.1 | 0.533413267  | 5.83E-41  | postive  |
| IREB2          | AP001429.1 | 0.446622134  | 8.72E-28  | postive  |
| GABPB1         | AP001429.1 | 0.521971435  | 5.33E-39  | postive  |
| PIK3CA         | AP001429.1 | 0.480585063  | 1.70E-32  | postive  |
| KRAS           | AP001429.1 | 0.401024719  | 3.05E-22  | postive  |
| MAPK8          | AP001429.1 | 0.40537408   | 9.81E-23  | postive  |
| LINC00472      | AP001429.1 | 0.931111908  | 2.23E-237 | postive  |
| ATM            | AP001429.1 | 0.597472597  | 1.86E-53  | postive  |
| HELLS          | LINC01772  | 0.425723859  | 3.86E-25  | postive  |
| ZNF419         | LINC01772  | 0.582955933  | 2.22E-50  | postive  |
| VEGFA          | LINC01772  | 0.501030265  | 1.34E-35  | postive  |
| TUBE1          | LINC01772  | 0.656710349  | 8.15E-68  | postive  |
| SETD1B         | LINC01772  | 0.52280242   | 3.86E-39  | postive  |
| ALOX12         | LINC01772  | 0.722466618  | 4.11E-88  | postive  |
| GABPB1         | LINC01772  | 0.504625866  | 3.64E-36  | postive  |
| LINC00472      | LINC01772  | 0.409579537  | 3.22E-23  | postive  |
| ATM            | LINC01772  | 0.629785844  | 6.65E-61  | postive  |

|           |            |              |          |          |
|-----------|------------|--------------|----------|----------|
| TAZ       | LINC01772  | 0.467199745  | 1.41E-30 | postive  |
| FBXW7     | LINC01772  | 0.519954912  | 1.16E-38 | postive  |
| ZNF419    | AL022322.1 | 0.490884302  | 4.93E-34 | postive  |
| VEGFA     | AL022322.1 | 0.495502972  | 9.71E-35 | postive  |
| TUBE1     | AL022322.1 | 0.566827393  | 3.87E-47 | postive  |
| SETD1B    | AL022322.1 | 0.482454085  | 9.00E-33 | postive  |
| DRD4      | AL022322.1 | 0.426854975  | 2.81E-25 | postive  |
| ALOX12    | AL022322.1 | 0.699164728  | 2.76E-80 | postive  |
| TAZ       | AL022322.1 | 0.565821424  | 6.09E-47 | postive  |
| HELLS     | AC015849.3 | 0.549186378  | 8.63E-44 | postive  |
| ZNF419    | AC015849.3 | 0.540188745  | 3.70E-42 | postive  |
| TUBE1     | AC015849.3 | 0.579810929  | 9.82E-50 | postive  |
| SETD1B    | AC015849.3 | 0.44372527   | 2.08E-27 | postive  |
| ALOX12    | AC015849.3 | 0.704148894  | 6.78E-82 | postive  |
| GABPB1    | AC015849.3 | 0.552862745  | 1.80E-44 | postive  |
| MAPK8     | AC015849.3 | 0.431087936  | 8.41E-26 | postive  |
| LINC00472 | AC015849.3 | 0.549933302  | 6.29E-44 | postive  |
| ATM       | AC015849.3 | 0.665669767  | 2.82E-70 | postive  |
| FBXW7     | AC015849.3 | 0.554016225  | 1.09E-44 | postive  |
| ALOX12    | OGFRP1     | 0.420802926  | 1.52E-24 | postive  |
| ATM       | OGFRP1     | 0.433565518  | 4.12E-26 | postive  |
| HELLS     | AL162727.2 | 0.473957218  | 1.55E-31 | postive  |
| ZNF419    | AL162727.2 | 0.40956927   | 3.23E-23 | postive  |
| TUBE1     | AL162727.2 | 0.464440098  | 3.43E-30 | postive  |
| ALOX12    | AL162727.2 | 0.500518855  | 1.61E-35 | postive  |
| GABPB1    | AL162727.2 | 0.56086514   | 5.52E-46 | postive  |
| LINC00472 | AL162727.2 | 0.539574506  | 4.77E-42 | postive  |
| ATM       | AL162727.2 | 0.685288013  | 5.65E-76 | postive  |
| FBXW7     | AL162727.2 | 0.53513818   | 2.91E-41 | postive  |
| HELLS     | AC131391.1 | 0.479392938  | 2.53E-32 | postive  |
| KLHL24    | AC131391.1 | 0.401479451  | 2.71E-22 | postive  |
| GABPB1    | AC131391.1 | 0.485890712  | 2.78E-33 | postive  |
| ATG7      | AC131391.1 | 0.463398424  | 4.78E-30 | postive  |
| LINC00472 | AC131391.1 | 0.674641565  | 7.92E-73 | postive  |
| ATM       | AC131391.1 | 0.670365425  | 1.34E-71 | postive  |
| FBXW7     | AC131391.1 | 0.422194345  | 1.04E-24 | postive  |
| TFAP2C    | AC124947.1 | 0.575435091  | 7.59E-49 | postive  |
| HBA1      | AC124947.1 | 0.520668615  | 8.81E-39 | postive  |
| IL33      | LINC00702  | 0.513487558  | 1.36E-37 | postive  |
| ZEB1      | LINC00702  | 0.431297694  | 7.92E-26 | postive  |
| HELLS     | AC018926.1 | 0.503346735  | 5.80E-36 | postive  |
| TUBE1     | AC018926.1 | 0.517812196  | 2.64E-38 | postive  |
| ALOX12    | AC018926.1 | 0.468811444  | 8.37E-31 | postive  |
| GABPB1    | AC018926.1 | 0.555867212  | 4.92E-45 | postive  |
| LINC00472 | AC018926.1 | 0.693295371  | 1.97E-78 | postive  |
| ATM       | AC018926.1 | 0.687423705  | 1.27E-76 | postive  |
| FBXW7     | AC018926.1 | 0.497664094  | 4.50E-35 | postive  |
| TAZ       | AC010487.1 | 0.408364947  | 4.45E-23 | postive  |
| FANCD2    | AC092112.1 | 0.48600319   | 2.68E-33 | postive  |
| TFAP2C    | AC092112.1 | 0.502953237  | 6.69E-36 | postive  |
| HSPA5     | AC015726.1 | -0.40316962  | 1.75E-22 | negative |
| LAMP2     | AC015726.1 | -0.424254935 | 5.83E-25 | negative |
| PHKG2     | AC015726.1 | 0.479328862  | 2.59E-32 | postive  |
| TAZ       | AC015726.1 | 0.566430257  | 4.63E-47 | postive  |
| MTDH      | AC015726.1 | -0.436472464 | 1.77E-26 | negative |
| HELLS     | A2M-AS1    | 0.417250542  | 4.05E-24 | postive  |
| GABPB1    | A2M-AS1    | 0.465487166  | 2.45E-30 | postive  |
| ATM       | A2M-AS1    | 0.528418674  | 4.27E-40 | postive  |



|           |            |              |           |          |
|-----------|------------|--------------|-----------|----------|
| KLHL24    | AC008649.2 | 0.510622987  | 3.97E-37  | postive  |
| IREB2     | AC008649.2 | 0.401552027  | 2.66E-22  | postive  |
| GABPB1    | AC008649.2 | 0.481728375  | 1.15E-32  | postive  |
| PIK3CA    | AC008649.2 | 0.440782079  | 4.99E-27  | postive  |
| LINC00472 | AC008649.2 | 0.919463353  | 7.35E-220 | postive  |
| ATM       | AC008649.2 | 0.538714072  | 6.78E-42  | postive  |
| FANCD2    | AC073842.2 | 0.455172146  | 6.36E-29  | postive  |
| HELLS     | AC073842.2 | 0.464180458  | 3.72E-30  | postive  |
| ZNF419    | AC073842.2 | 0.506473198  | 1.85E-36  | postive  |
| TUBE1     | AC073842.2 | 0.555416195  | 5.98E-45  | postive  |
| SETD1B    | AC073842.2 | 0.450246469  | 2.90E-28  | postive  |
| ALOX12    | AC073842.2 | 0.681166606  | 9.68E-75  | postive  |
| TAZ       | AC073842.2 | 0.50008091   | 1.89E-35  | postive  |
| NOX4      | AP003400.1 | 0.502519464  | 7.83E-36  | postive  |
| TUBE1     | AC092953.2 | 0.405169134  | 1.03E-22  | postive  |
| HELLS     | AC010201.1 | 0.410330865  | 2.63E-23  | postive  |
| ZNF419    | AC010201.1 | 0.540470299  | 3.30E-42  | postive  |
| TUBE1     | AC010201.1 | 0.610063583  | 2.95E-56  | postive  |
| ALOX12    | AC010201.1 | 0.612041233  | 1.04E-56  | postive  |
| GABPB1    | AC010201.1 | 0.452256544  | 1.57E-28  | postive  |
| PHKG2     | AC010201.1 | 0.45744779   | 3.13E-29  | postive  |
| LINC00472 | AC010201.1 | 0.422419949  | 9.73E-25  | postive  |
| ATM       | AC010201.1 | 0.483626103  | 6.04E-33  | postive  |
| TAZ       | AC010201.1 | 0.587137582  | 2.99E-51  | postive  |
| KLHL24    | AC023421.1 | 0.525513883  | 1.34E-39  | postive  |
| LINC00472 | AC023421.1 | 0.754331871  | 3.25E-100 | postive  |
| LPIN1     | AC023421.1 | 0.425804932  | 3.77E-25  | postive  |
| KLHL24    | AC084048.1 | 0.562844801  | 2.30E-46  | postive  |
| PIK3CA    | AC084048.1 | 0.41828713   | 3.05E-24  | postive  |
| LINC00472 | AC084048.1 | 0.840462845  | 5.17E-145 | postive  |
| HELLS     | AL157400.4 | 0.443353864  | 2.32E-27  | postive  |
| ZNF419    | AL157400.4 | 0.434475922  | 3.17E-26  | postive  |
| TUBE1     | AL157400.4 | 0.58897      | 1.23E-51  | postive  |
| ALOX12    | AL157400.4 | 0.590687195  | 5.32E-52  | postive  |
| GABPB1    | AL157400.4 | 0.454533354  | 7.76E-29  | postive  |
| MAPK8     | AL157400.4 | 0.46008913   | 1.37E-29  | postive  |
| ATM       | AL157400.4 | 0.683125128  | 2.52E-75  | postive  |
| FBXW7     | AL157400.4 | 0.443150001  | 2.47E-27  | postive  |
| GPX4      | AC040169.1 | 0.451398731  | 2.04E-28  | postive  |
| RB1       | AC040169.1 | -0.408661193 | 4.11E-23  | negative |
| HSPB1     | AC040169.1 | 0.550508021  | 4.92E-44  | postive  |
| OTUB1     | AC040169.1 | 0.407648937  | 5.38E-23  | postive  |
| IREB2     | AC040169.1 | -0.403829768 | 1.47E-22  | negative |
| HRAS      | AC040169.1 | 0.63439085   | 4.89E-62  | postive  |
| NCOA4     | AC040169.1 | -0.403295243 | 1.69E-22  | negative |
| PHKG2     | AC040169.1 | 0.497707252  | 4.43E-35  | postive  |
| PRKAA1    | AC040169.1 | -0.421260174 | 1.34E-24  | negative |
| ANO6      | AC040169.1 | -0.407386347 | 5.77E-23  | negative |
| EGLN2     | AC040169.1 | 0.511326931  | 3.05E-37  | postive  |
| SIRT1     | AC040169.1 | -0.410390904 | 2.59E-23  | negative |
| FANCD2    | LINC01410  | 0.510026617  | 4.96E-37  | postive  |
| HELLS     | LINC01410  | 0.460476962  | 1.21E-29  | postive  |
| HELLS     | SSBP3-AS1  | 0.402930969  | 1.86E-22  | postive  |
| ZNF419    | SSBP3-AS1  | 0.526357317  | 9.63E-40  | postive  |
| VEGFA     | SSBP3-AS1  | 0.474641092  | 1.24E-31  | postive  |
| TUBE1     | SSBP3-AS1  | 0.563674896  | 1.59E-46  | postive  |
| SETD1B    | SSBP3-AS1  | 0.460150875  | 1.34E-29  | postive  |
| ALOX12    | SSBP3-AS1  | 0.596744705  | 2.67E-53  | postive  |

|           |            |              |           |          |
|-----------|------------|--------------|-----------|----------|
| GABPB1    | SSBP3-AS1  | 0.472499602  | 2.51E-31  | postive  |
| LINC00472 | SSBP3-AS1  | 0.458339386  | 2.37E-29  | postive  |
| ATM       | SSBP3-AS1  | 0.613665702  | 4.42E-57  | postive  |
| FBXW7     | SSBP3-AS1  | 0.513954273  | 1.14E-37  | postive  |
| BRD4      | AL136295.7 | 0.419472558  | 2.20E-24  | postive  |
| ZNF419    | AL136295.7 | 0.563767955  | 1.53E-46  | postive  |
| VEGFA     | AL136295.7 | 0.460830284  | 1.08E-29  | postive  |
| TUBE1     | AL136295.7 | 0.512905813  | 1.69E-37  | postive  |
| SETD1B    | AL136295.7 | 0.418407255  | 2.95E-24  | postive  |
| DRD4      | AL136295.7 | 0.438541288  | 9.67E-27  | postive  |
| ALOX12    | AL136295.7 | 0.595300746  | 5.48E-53  | postive  |
| NCOA4     | AL136295.7 | -0.411051634 | 2.17E-23  | negative |
| PHKG2     | AL136295.7 | 0.530878315  | 1.61E-40  | postive  |
| TAZ       | AL136295.7 | 0.746658077  | 3.90E-97  | postive  |
| HELLS     | HCG18      | 0.550207521  | 5.60E-44  | postive  |
| ARNTL     | HCG18      | 0.400277866  | 3.70E-22  | postive  |
| ZNF419    | HCG18      | 0.426515226  | 3.09E-25  | postive  |
| ZFP69B    | HCG18      | 0.404910205  | 1.11E-22  | postive  |
| TUBE1     | HCG18      | 0.549532168  | 7.46E-44  | postive  |
| ALOX12    | HCG18      | 0.528921562  | 3.50E-40  | postive  |
| IREB2     | HCG18      | 0.442417304  | 3.07E-27  | postive  |
| GABPB1    | HCG18      | 0.63076407   | 3.84E-61  | postive  |
| PIK3CA    | HCG18      | 0.401042247  | 3.04E-22  | postive  |
| ATG7      | HCG18      | 0.422630781  | 9.18E-25  | postive  |
| ZEB1      | HCG18      | 0.409190717  | 3.57E-23  | postive  |
| MAPK8     | HCG18      | 0.528506717  | 4.13E-40  | postive  |
| LINC00472 | HCG18      | 0.596563319  | 2.92E-53  | postive  |
| ATM       | HCG18      | 0.779083514  | 5.59E-111 | postive  |
| FBXW7     | HCG18      | 0.549256256  | 8.38E-44  | postive  |
| KLHL24    | AC121493.1 | 0.471648274  | 3.32E-31  | postive  |
| GABPB1    | AC121493.1 | 0.426688847  | 2.94E-25  | postive  |
| LINC00472 | AC121493.1 | 0.723948889  | 1.23E-88  | postive  |
| DRD4      | AC087289.5 | 0.421106578  | 1.40E-24  | postive  |
| ALOX12    | AC087289.5 | 0.497101295  | 5.50E-35  | postive  |
| PHKG2     | AC087289.5 | 0.555053209  | 7.00E-45  | postive  |
| TAZ       | AC087289.5 | 0.622208874  | 4.44E-59  | postive  |
| ZNF419    | AL354733.3 | 0.58435296   | 1.14E-50  | postive  |
| VEGFA     | AL354733.3 | 0.544926467  | 5.19E-43  | postive  |
| TUBE1     | AL354733.3 | 0.663635577  | 1.04E-69  | postive  |
| SETD1B    | AL354733.3 | 0.506683117  | 1.71E-36  | postive  |
| ALOX12    | AL354733.3 | 0.683913137  | 1.46E-75  | postive  |
| GABPB1    | AL354733.3 | 0.417623561  | 3.66E-24  | postive  |
| ATM       | AL354733.3 | 0.502449811  | 8.03E-36  | postive  |
| YY1AP1    | AL354733.3 | 0.427056922  | 2.65E-25  | postive  |
| TAZ       | AL354733.3 | 0.430692031  | 9.42E-26  | postive  |
| FBXW7     | AL354733.3 | 0.414788878  | 7.93E-24  | postive  |
| BRD4      | LINC00174  | 0.411227274  | 2.07E-23  | postive  |
| ZNF419    | LINC00174  | 0.508234801  | 9.64E-37  | postive  |
| VEGFA     | LINC00174  | 0.414939495  | 7.61E-24  | postive  |
| TUBE1     | LINC00174  | 0.574861051  | 9.90E-49  | postive  |
| SETD1B    | LINC00174  | 0.43182381   | 6.81E-26  | postive  |
| DRD4      | LINC00174  | 0.503693145  | 5.11E-36  | postive  |
| ALOX12    | LINC00174  | 0.632380966  | 1.54E-61  | postive  |
| PHKG2     | LINC00174  | 0.612146606  | 9.86E-57  | postive  |
| TAZ       | LINC00174  | 0.73637735   | 3.53E-93  | postive  |
| FANCD2    | AC025171.3 | 0.443028908  | 2.56E-27  | postive  |
| HELLS     | AC025171.3 | 0.464056775  | 3.87E-30  | postive  |
| ALOX12    | AC025171.3 | 0.414397646  | 8.82E-24  | postive  |

|           |            |              |           |          |
|-----------|------------|--------------|-----------|----------|
| TFAP2C    | AC025171.3 | 0.403772793  | 1.49E-22  | postive  |
| FBXW7     | AC025171.3 | 0.414647331  | 8.24E-24  | postive  |
| RPL8      | CRIM1-DT   | 0.419006225  | 2.50E-24  | postive  |
| HRAS      | CRIM1-DT   | 0.504015092  | 4.54E-36  | postive  |
| EGLN2     | CRIM1-DT   | 0.401177907  | 2.93E-22  | postive  |
| ZNF419    | AC012615.1 | 0.537993293  | 9.11E-42  | postive  |
| VEGFA     | AC012615.1 | 0.405692024  | 9.02E-23  | postive  |
| TUBE1     | AC012615.1 | 0.499178328  | 2.62E-35  | postive  |
| ALOX12    | AC012615.1 | 0.488209014  | 1.25E-33  | postive  |
| NCOA4     | AC012615.1 | -0.409258561 | 3.51E-23  | negative |
| PHKG2     | AC012615.1 | 0.599678328  | 6.12E-54  | postive  |
| TAZ       | AC012615.1 | 0.769131228  | 1.73E-106 | postive  |
| HELLS     | LINC01473  | 0.597432899  | 1.89E-53  | postive  |
| ZNF419    | LINC01473  | 0.400692956  | 3.32E-22  | postive  |
| TUBE1     | LINC01473  | 0.5503673    | 5.23E-44  | postive  |
| ALOX12    | LINC01473  | 0.477941049  | 4.12E-32  | postive  |
| GABPB1    | LINC01473  | 0.604834077  | 4.44E-55  | postive  |
| ATG7      | LINC01473  | 0.419671126  | 2.08E-24  | postive  |
| MAPK8     | LINC01473  | 0.423184014  | 7.87E-25  | postive  |
| LINC00472 | LINC01473  | 0.644530365  | 1.33E-64  | postive  |
| ATM       | LINC01473  | 0.791028431  | 1.10E-116 | postive  |
| FBXW7     | LINC01473  | 0.598015937  | 1.41E-53  | postive  |
| BNIP3     | MSC-AS1    | 0.446443207  | 9.20E-28  | postive  |
| HSD17B11  | MSC-AS1    | 0.460039103  | 1.39E-29  | postive  |
| NRAS      | MSC-AS1    | 0.496373121  | 7.13E-35  | postive  |
| ANO6      | MSC-AS1    | 0.420464293  | 1.67E-24  | postive  |
| MTDH      | MSC-AS1    | 0.482209333  | 9.78E-33  | postive  |
| BACH1     | MSC-AS1    | 0.436117742  | 1.97E-26  | postive  |
| ASNS      | MIR193BHG  | 0.455694074  | 5.41E-29  | postive  |
| TRIB3     | MIR193BHG  | 0.412540624  | 1.46E-23  | postive  |
| AURKA     | MIR193BHG  | 0.400961951  | 3.10E-22  | postive  |
| CARS1     | MIR193BHG  | 0.429746563  | 1.23E-25  | postive  |
| TUBE1     | AC244035.1 | 0.439406396  | 7.50E-27  | postive  |
| FANCD2    | AC010973.1 | 0.408431724  | 4.37E-23  | postive  |
| HELLS     | AC010973.1 | 0.435160786  | 2.60E-26  | postive  |
| ZNF419    | AC010973.1 | 0.490042396  | 6.62E-34  | postive  |
| TUBE1     | AC010973.1 | 0.524364381  | 2.10E-39  | postive  |
| ALOX12    | AC010973.1 | 0.613486938  | 4.86E-57  | postive  |
| GABPB1    | AC010973.1 | 0.40309156   | 1.78E-22  | postive  |
| ATM       | AC010973.1 | 0.49492851   | 1.19E-34  | postive  |
| FBXW7     | AC010973.1 | 0.445838767  | 1.10E-27  | postive  |
| RPL8      | HOXC-AS1   | 0.459114618  | 1.86E-29  | postive  |
| TAZ       | AC040160.1 | 0.410704811  | 2.38E-23  | postive  |
| WIP1      | LINC02038  | 0.40077033   | 3.26E-22  | postive  |
| ZNF419    | AC010809.1 | 0.435044263  | 2.69E-26  | postive  |
| HELLS     | AC073912.1 | 0.415239609  | 7.02E-24  | postive  |
| ZNF419    | AC073912.1 | 0.424731823  | 5.10E-25  | postive  |
| TUBE1     | AC073912.1 | 0.512009349  | 2.37E-37  | postive  |
| ALOX12    | AC073912.1 | 0.593416337  | 1.39E-52  | postive  |
| GABPB1    | AC073912.1 | 0.470325567  | 5.11E-31  | postive  |
| ATM       | AC073912.1 | 0.613105536  | 5.94E-57  | postive  |
| FBXW7     | AC073912.1 | 0.405003073  | 1.08E-22  | postive  |
| KLHL24    | AC068580.1 | 0.460504443  | 1.20E-29  | postive  |
| LINC00472 | AC068580.1 | 0.461164855  | 9.72E-30  | postive  |
| LPIN1     | AC068580.1 | 0.519984253  | 1.15E-38  | postive  |
| TUBE1     | PSORS1C3   | 0.50607991   | 2.13E-36  | postive  |
| ALOX12    | PSORS1C3   | 0.546986262  | 2.19E-43  | postive  |
| ATM       | PSORS1C3   | 0.49296982   | 2.38E-34  | postive  |

|           |            |              |          |          |
|-----------|------------|--------------|----------|----------|
| FANCD2    | AC092802.2 | 0.427201533  | 2.54E-25 | postive  |
| HELLS     | AC092802.2 | 0.496754387  | 6.22E-35 | postive  |
| ALOX12    | AC092802.2 | 0.556212871  | 4.23E-45 | postive  |
| TFAP2C    | AC092802.2 | 0.470979259  | 4.13E-31 | postive  |
| HBA1      | AC092802.2 | 0.40554344   | 9.38E-23 | postive  |
| DUOX1     | AC092802.2 | 0.469291836  | 7.16E-31 | postive  |
| ATM       | AC092802.2 | 0.425402782  | 4.22E-25 | postive  |
| ZFP36     | NR4A1AS    | 0.41342847   | 1.15E-23 | postive  |
| ATF3      | NR4A1AS    | 0.419682741  | 2.08E-24 | postive  |
| VEGFA     | NR4A1AS    | 0.42612406   | 3.45E-25 | postive  |
| PHKG2     | LINC02804  | 0.499082409  | 2.71E-35 | postive  |
| TAZ       | LINC02804  | 0.62641807   | 4.37E-60 | postive  |
| ISCU      | AL049870.3 | 0.563629214  | 1.62E-46 | postive  |
| KLHL24    | AL049870.3 | 0.4056759    | 9.06E-23 | postive  |
| ATG4D     | AL049870.3 | 0.404539422  | 1.22E-22 | postive  |
| GABARAPL1 | AL049870.3 | 0.567402042  | 2.99E-47 | postive  |
| LINC00472 | AL049870.3 | 0.420996     | 1.45E-24 | postive  |
| LPIN1     | AL049870.3 | 0.522873907  | 3.75E-39 | postive  |
| FANCD2    | ZNF433-AS1 | 0.465203039  | 2.68E-30 | postive  |
| HELLS     | ZNF433-AS1 | 0.640414979  | 1.50E-63 | postive  |
| ZNF419    | ZNF433-AS1 | 0.486938255  | 1.94E-33 | postive  |
| TUBE1     | ZNF433-AS1 | 0.502493819  | 7.90E-36 | postive  |
| ALOX12    | ZNF433-AS1 | 0.446663433  | 8.61E-28 | postive  |
| GABPB1    | ZNF433-AS1 | 0.597560058  | 1.78E-53 | postive  |
| ATG7      | ZNF433-AS1 | 0.416840234  | 4.54E-24 | postive  |
| LINC00472 | ZNF433-AS1 | 0.685447114  | 5.05E-76 | postive  |
| ATM       | ZNF433-AS1 | 0.605069394  | 3.93E-55 | postive  |
| FBXW7     | ZNF433-AS1 | 0.503543486  | 5.40E-36 | postive  |
| ALOX12    | RPL37A-DT  | 0.50614584   | 2.08E-36 | postive  |
| ZFP69B    | AC092614.1 | 0.405011086  | 1.08E-22 | postive  |
| GABPB1    | AC092614.1 | 0.554807479  | 7.78E-45 | postive  |
| ZEB1      | AC092614.1 | 0.626393994  | 4.42E-60 | postive  |
| MAPK8     | AC092614.1 | 0.497571441  | 4.65E-35 | postive  |
| LINC00472 | AC092614.1 | 0.478946354  | 2.94E-32 | postive  |
| ATM       | AC092614.1 | 0.584954555  | 8.54E-51 | postive  |
| FBXW7     | AC092614.1 | 0.466855774  | 1.58E-30 | postive  |
| GPX4      | AC084036.1 | 0.459687388  | 1.55E-29 | postive  |
| HSPB1     | AC084036.1 | 0.47707368   | 5.51E-32 | postive  |
| EIF2S1    | AC084036.1 | -0.45088764  | 2.38E-28 | negative |
| IREB2     | AC084036.1 | -0.41911349  | 2.43E-24 | negative |
| NOX1      | AC084036.1 | 0.46490167   | 2.95E-30 | postive  |
| HRAS      | AC084036.1 | 0.437518561  | 1.31E-26 | postive  |
| NCOA4     | AC084036.1 | -0.47179294  | 3.16E-31 | negative |
| PHKG2     | AC084036.1 | 0.577000916  | 3.66E-49 | postive  |
| BECN1     | AC084036.1 | -0.535061194 | 3.00E-41 | negative |
| BID       | AC084036.1 | 0.463171622  | 5.14E-30 | postive  |
| SIRT1     | AC084036.1 | -0.425723279 | 3.86E-25 | negative |
| HRAS      | AC103724.4 | 0.499201618  | 2.59E-35 | postive  |
| EGLN2     | AC103724.4 | 0.566569769  | 4.35E-47 | postive  |
| HELLS     | AL033397.2 | 0.543298736  | 1.02E-42 | postive  |
| ZNF419    | AL033397.2 | 0.441671254  | 3.84E-27 | postive  |
| TUBE1     | AL033397.2 | 0.538958422  | 6.14E-42 | postive  |
| ALOX12    | AL033397.2 | 0.544332447  | 6.65E-43 | postive  |
| GABPB1    | AL033397.2 | 0.524723352  | 1.83E-39 | postive  |
| MAPK8     | AL033397.2 | 0.421587854  | 1.23E-24 | postive  |
| LINC00472 | AL033397.2 | 0.596369252  | 3.22E-53 | postive  |
| ATM       | AL033397.2 | 0.694970561  | 5.88E-79 | postive  |
| FBXW7     | AL033397.2 | 0.520948395  | 7.91E-39 | postive  |

|           |            |              |           |          |
|-----------|------------|--------------|-----------|----------|
| HRAS      | AC010654.1 | 0.45517159   | 6.36E-29  | postive  |
| PHKG2     | AC010654.1 | 0.405770031  | 8.84E-23  | postive  |
| EGLN2     | AC010654.1 | 0.544314065  | 6.70E-43  | postive  |
| TAZ       | AC010654.1 | 0.401852684  | 2.46E-22  | postive  |
| GPX4      | AC010503.4 | 0.420881673  | 1.49E-24  | postive  |
| ZFP69B    | AC010503.4 | -0.452458    | 1.47E-28  | negative |
| ACSL4     | AC010503.4 | -0.401322891 | 2.82E-22  | negative |
| ATG7      | AC010503.4 | -0.462410567 | 6.55E-30  | negative |
| PEBP1     | AC010503.4 | 0.640445129  | 1.48E-63  | postive  |
| MIOX      | AC010503.4 | 0.402965532  | 1.84E-22  | postive  |
| MTDH      | AC010503.4 | -0.42981532  | 1.21E-25  | negative |
| PANX1     | AC010503.4 | -0.481882479 | 1.09E-32  | negative |
| BACH1     | AC010503.4 | -0.466344148 | 1.86E-30  | negative |
| EIF2S1    | LYRM4-AS1  | 0.46405128   | 3.88E-30  | postive  |
| MAPK14    | LYRM4-AS1  | 0.43071376   | 9.36E-26  | postive  |
| ZNF419    | AC245060.2 | 0.422497404  | 9.52E-25  | postive  |
| SETD1B    | AC245060.2 | 0.514104632  | 1.08E-37  | postive  |
| ALOX12    | AC245060.2 | 0.495352563  | 1.02E-34  | postive  |
| ZNF419    | MRPL20-DT  | 0.522440918  | 4.44E-39  | postive  |
| TUBE1     | MRPL20-DT  | 0.474057552  | 1.50E-31  | postive  |
| SETD1B    | MRPL20-DT  | 0.479234445  | 2.67E-32  | postive  |
| ALOX12    | MRPL20-DT  | 0.550012654  | 6.08E-44  | postive  |
| PHKG2     | MRPL20-DT  | 0.593865335  | 1.12E-52  | postive  |
| TAZ       | MRPL20-DT  | 0.693523331  | 1.67E-78  | postive  |
| HSF1      | PCAT6      | 0.403147582  | 1.76E-22  | postive  |
| NCOA4     | PCAT6      | -0.442303981 | 3.18E-27  | negative |
| PHKG2     | PCAT6      | 0.525715362  | 1.24E-39  | postive  |
| LONP1     | PCAT6      | 0.405773904  | 8.83E-23  | postive  |
| PHKG2     | TFAP2A-AS1 | 0.48282974   | 7.92E-33  | postive  |
| HELLS     | AP000919.3 | 0.495357189  | 1.02E-34  | postive  |
| TUBE1     | AP000919.3 | 0.429168548  | 1.46E-25  | postive  |
| ALOX12    | AP000919.3 | 0.572585229  | 2.83E-48  | postive  |
| GABPB1    | AP000919.3 | 0.409216126  | 3.55E-23  | postive  |
| ATM       | AP000919.3 | 0.569936538  | 9.49E-48  | postive  |
| FBXW7     | AP000919.3 | 0.455595579  | 5.58E-29  | postive  |
| GCH1      | AL365361.1 | 0.487509604  | 1.59E-33  | postive  |
| CYBB      | AL365361.1 | 0.428981943  | 1.53E-25  | postive  |
| IFNG      | AL365361.1 | 0.447415179  | 6.86E-28  | postive  |
| TNFAIP3   | AL365361.1 | 0.413901037  | 1.01E-23  | postive  |
| FBXW7     | AL365361.1 | 0.483998015  | 5.32E-33  | postive  |
| KLHL24    | LINC-PINT  | 0.616486789  | 9.82E-58  | postive  |
| GABPB1    | LINC-PINT  | 0.474201405  | 1.43E-31  | postive  |
| PIK3CA    | LINC-PINT  | 0.455249162  | 6.21E-29  | postive  |
| LINC00472 | LINC-PINT  | 0.925026685  | 7.15E-228 | postive  |
| LPIN1     | LINC-PINT  | 0.481209966  | 1.37E-32  | postive  |
| ATM       | LINC-PINT  | 0.418588858  | 2.81E-24  | postive  |
| ZNF419    | AC103691.1 | 0.417129841  | 4.19E-24  | postive  |
| NCOA4     | AC103691.1 | -0.406147704 | 8.00E-23  | negative |
| PHKG2     | AC103691.1 | 0.523440832  | 3.01E-39  | postive  |
| EGLN2     | AC103691.1 | 0.417003287  | 4.34E-24  | postive  |
| TAZ       | AC103691.1 | 0.603734193  | 7.80E-55  | postive  |
| HELLS     | AC093227.1 | 0.417141586  | 4.18E-24  | postive  |
| ZNF419    | AC093227.1 | 0.531670328  | 1.17E-40  | postive  |
| TUBE1     | AC093227.1 | 0.666899029  | 1.28E-70  | postive  |
| ALOX12    | AC093227.1 | 0.46256911   | 6.22E-30  | postive  |
| HMGB1     | AC093227.1 | 0.429253991  | 1.42E-25  | postive  |
| GABPB1    | AC093227.1 | 0.504834737  | 3.37E-36  | postive  |
| MAPK8     | AC093227.1 | 0.437956115  | 1.15E-26  | postive  |

|           |             |              |           |          |
|-----------|-------------|--------------|-----------|----------|
| PRKAA1    | AC093227.1  | 0.406130528  | 8.04E-23  | postive  |
| ATM       | AC093227.1  | 0.509349406  | 6.38E-37  | postive  |
| FBXW7     | AC093227.1  | 0.408705784  | 4.06E-23  | postive  |
| EPAS1     | ZNF503-AS1  | 0.449134308  | 4.07E-28  | postive  |
| VEGFA     | AL109615.3  | 0.457633413  | 2.95E-29  | postive  |
| HELLS     | AC138207.4  | 0.5033394    | 5.81E-36  | postive  |
| ZNF419    | AC138207.4  | 0.487923186  | 1.38E-33  | postive  |
| TUBE1     | AC138207.4  | 0.560064043  | 7.86E-46  | postive  |
| SETD1B    | AC138207.4  | 0.443911279  | 1.97E-27  | postive  |
| ALOX12    | AC138207.4  | 0.652658334  | 9.92E-67  | postive  |
| GABPB1    | AC138207.4  | 0.57044993   | 7.51E-48  | postive  |
| LINC00472 | AC138207.4  | 0.53208194   | 9.94E-41  | postive  |
| ATM       | AC138207.4  | 0.677666988  | 1.04E-73  | postive  |
| FBXW7     | AC138207.4  | 0.549259452  | 8.37E-44  | postive  |
| HELLS     | AC131971.1  | 0.426486985  | 3.11E-25  | postive  |
| KLHL24    | AC131971.1  | 0.537173562  | 1.27E-41  | postive  |
| IREB2     | AC131971.1  | 0.445676695  | 1.16E-27  | postive  |
| GABPB1    | AC131971.1  | 0.538700533  | 6.82E-42  | postive  |
| PIK3CA    | AC131971.1  | 0.483898247  | 5.51E-33  | postive  |
| KRAS      | AC131971.1  | 0.401855046  | 2.46E-22  | postive  |
| ATG7      | AC131971.1  | 0.408150067  | 4.71E-23  | postive  |
| MAPK8     | AC131971.1  | 0.410662351  | 2.41E-23  | postive  |
| LINC00472 | AC131971.1  | 0.927836202  | 3.71E-232 | postive  |
| TGFBR1    | AC131971.1  | 0.405497298  | 9.49E-23  | postive  |
| ATM       | AC131971.1  | 0.625697827  | 6.51E-60  | postive  |
| FBXW7     | AC131971.1  | 0.412843126  | 1.34E-23  | postive  |
| ZNF419    | AL513218.1  | 0.485362232  | 3.34E-33  | postive  |
| TUBE1     | AL513218.1  | 0.463221288  | 5.06E-30  | postive  |
| ALOX12    | AL513218.1  | 0.504879374  | 3.31E-36  | postive  |
| NCOA4     | AL513218.1  | -0.410265214 | 2.68E-23  | negative |
| PHKG2     | AL513218.1  | 0.617749455  | 4.99E-58  | postive  |
| TAZ       | AL513218.1  | 0.732625739  | 8.81E-92  | postive  |
| VEGFA     | AC025627.1  | 0.406081908  | 8.14E-23  | postive  |
| TUBE1     | AC025627.1  | 0.505174564  | 2.97E-36  | postive  |
| ALOX12    | AC025627.1  | 0.672874187  | 2.56E-72  | postive  |
| ATM       | AC025627.1  | 0.518596139  | 1.95E-38  | postive  |
| KLHL24    | ARRDC3-AS1  | 0.642286216  | 5.01E-64  | postive  |
| IREB2     | ARRDC3-AS1  | 0.455998512  | 4.92E-29  | postive  |
| GABPB1    | ARRDC3-AS1  | 0.495654033  | 9.20E-35  | postive  |
| PIK3CA    | ARRDC3-AS1  | 0.522331616  | 4.63E-39  | postive  |
| KRAS      | ARRDC3-AS1  | 0.432456161  | 5.68E-26  | postive  |
| ATG7      | ARRDC3-AS1  | 0.427373344  | 2.42E-25  | postive  |
| LINC00472 | ARRDC3-AS1  | 0.899084194  | 8.61E-195 | postive  |
| PRKAA1    | ARRDC3-AS1  | 0.464591799  | 3.26E-30  | postive  |
| TGFBR1    | ARRDC3-AS1  | 0.424355102  | 5.67E-25  | postive  |
| LPIN1     | ARRDC3-AS1  | 0.483711502  | 5.87E-33  | postive  |
| ATM       | ARRDC3-AS1  | 0.561879377  | 3.53E-46  | postive  |
| FBXW7     | ARRDC3-AS1  | 0.438802888  | 8.95E-27  | postive  |
| HNF4A     | AC141273.1  | 0.403668771  | 1.53E-22  | postive  |
| PHKG2     | AC027020.2  | 0.459455787  | 1.67E-29  | postive  |
| TAZ       | AC027020.2  | 0.512523726  | 1.95E-37  | postive  |
| KLHL24    | C1QTNF7-AS1 | 0.525171367  | 1.53E-39  | postive  |
| TUBE1     | C1QTNF7-AS1 | 0.43384194   | 3.81E-26  | postive  |
| IREB2     | C1QTNF7-AS1 | 0.453263841  | 1.15E-28  | postive  |
| GABPB1    | C1QTNF7-AS1 | 0.517547403  | 2.92E-38  | postive  |
| PIK3CA    | C1QTNF7-AS1 | 0.473008097  | 2.12E-31  | postive  |
| KRAS      | C1QTNF7-AS1 | 0.444196208  | 1.81E-27  | postive  |
| MAPK8     | C1QTNF7-AS1 | 0.449303558  | 3.87E-28  | postive  |

|           |            |             |           |         |
|-----------|------------|-------------|-----------|---------|
| LINC00472 | C1QTNF7-AS | 0.926184243 | 1.29E-229 | postive |
| PRKAA1    | C1QTNF7-AS | 0.402895283 | 1.88E-22  | postive |
| ATM       | C1QTNF7-AS | 0.598082495 | 1.37E-53  | postive |
| ZNF419    | AC018648.1 | 0.452446377 | 1.48E-28  | postive |
| PHKG2     | AC018648.1 | 0.4694581   | 6.78E-31  | postive |
| TAZ       | AC018648.1 | 0.496776773 | 6.17E-35  | postive |
| PHKG2     | AC020658.5 | 0.560518533 | 6.44E-46  | postive |
| TAZ       | AC020658.5 | 0.5582835   | 1.72E-45  | postive |
| HELLS     | LINC02157  | 0.533733448 | 5.12E-41  | postive |
| TUBE1     | LINC02157  | 0.475958811 | 7.99E-32  | postive |
| ALOX12    | LINC02157  | 0.502530862 | 7.80E-36  | postive |
| GABPB1    | LINC02157  | 0.54522356  | 4.58E-43  | postive |
| MAPK8     | LINC02157  | 0.443464152 | 2.25E-27  | postive |
| LINC00472 | LINC02157  | 0.571610353 | 4.42E-48  | postive |
| ATM       | LINC02157  | 0.757457912 | 1.67E-101 | postive |
| FBXW7     | LINC02157  | 0.506875094 | 1.59E-36  | postive |
| HIC1      | SENCR      | 0.486519952 | 2.24E-33  | postive |
| CDKN2A    | SENCR      | 0.484956204 | 3.83E-33  | postive |
| SCP2      | AC009878.1 | 0.433859043 | 3.79E-26  | postive |
| SLC2A6    | DBH-AS1    | 0.412437887 | 1.50E-23  | postive |
| PHKG2     | DBH-AS1    | 0.430477659 | 1.00E-25  | postive |
| TAZ       | DBH-AS1    | 0.471823632 | 3.13E-31  | postive |
| KLHL24    | LINC02035  | 0.443249108 | 2.40E-27  | postive |
| LINC00472 | LINC02035  | 0.445417071 | 1.25E-27  | postive |
| TGFBR1    | LINC02035  | 0.427071289 | 2.64E-25  | postive |
| TFAP2C    | AC008514.1 | 0.523068429 | 3.48E-39  | postive |
| GCLC      | NORAD      | 0.426273989 | 3.30E-25  | postive |
| ACSL3     | NORAD      | 0.527093575 | 7.21E-40  | postive |
| OXSR1     | NORAD      | 0.452174568 | 1.61E-28  | postive |
| KLHL24    | NORAD      | 0.649734995 | 5.88E-66  | postive |
| MAP3K5    | NORAD      | 0.42835174  | 1.84E-25  | postive |
| EIF2AK4   | NORAD      | 0.453288198 | 1.14E-28  | postive |
| IREB2     | NORAD      | 0.611398362 | 1.46E-56  | postive |
| PIK3CA    | NORAD      | 0.668294133 | 5.17E-71  | postive |
| ACSL4     | NORAD      | 0.433242008 | 4.53E-26  | postive |
| KRAS      | NORAD      | 0.547090397 | 2.09E-43  | postive |
| SLC38A1   | NORAD      | 0.449523971 | 3.62E-28  | postive |
| MAPK8     | NORAD      | 0.48903302  | 9.40E-34  | postive |
| LINC00472 | NORAD      | 0.412572996 | 1.44E-23  | postive |
| PRKAA2    | NORAD      | 0.499013839 | 2.78E-35  | postive |
| PRKAA1    | NORAD      | 0.592935821 | 1.77E-52  | postive |
| MTDH      | NORAD      | 0.414297876 | 9.06E-24  | postive |
| SIRT1     | NORAD      | 0.431265176 | 7.99E-26  | postive |
| ZNF419    | AC090772.3 | 0.481798214 | 1.12E-32  | postive |
| TUBE1     | AC090772.3 | 0.52226601  | 4.75E-39  | postive |
| ALOX12    | AC090772.3 | 0.436229311 | 1.90E-26  | postive |
| GABPB1    | AC090772.3 | 0.412857582 | 1.34E-23  | postive |
| PHKG2     | AC090772.3 | 0.407484656 | 5.62E-23  | postive |
| LINC00472 | AC090772.3 | 0.489111915 | 9.15E-34  | postive |
| TAZ       | AC090772.3 | 0.531867807 | 1.08E-40  | postive |
| HELLS     | AC090948.3 | 0.510395529 | 4.32E-37  | postive |
| ZNF419    | AC090948.3 | 0.407238874 | 6.00E-23  | postive |
| TUBE1     | AC090948.3 | 0.493689321 | 1.84E-34  | postive |
| ALOX12    | AC090948.3 | 0.476480896 | 6.72E-32  | postive |
| GABPB1    | AC090948.3 | 0.550336066 | 5.30E-44  | postive |
| LINC00472 | AC090948.3 | 0.541423735 | 2.23E-42  | postive |
| ATM       | AC090948.3 | 0.628936401 | 1.07E-60  | postive |
| FBXW7     | AC090948.3 | 0.525842775 | 1.18E-39  | postive |

|                |            |              |           |          |
|----------------|------------|--------------|-----------|----------|
| ALOX12         | AC080023.1 | 0.443482939  | 2.24E-27  | postive  |
| HELLS          | PSMA3-AS1  | 0.418152324  | 3.17E-24  | postive  |
| BRD4           | PSMA3-AS1  | 0.428466524  | 1.78E-25  | postive  |
| ZNF419         | PSMA3-AS1  | 0.661644653  | 3.68E-69  | postive  |
| VEGFA          | PSMA3-AS1  | 0.493279156  | 2.13E-34  | postive  |
| TUBE1          | PSMA3-AS1  | 0.699324645  | 2.45E-80  | postive  |
| SETD1B         | PSMA3-AS1  | 0.505617736  | 2.53E-36  | postive  |
| ALOX12         | PSMA3-AS1  | 0.663932852  | 8.59E-70  | postive  |
| GABPB1         | PSMA3-AS1  | 0.604364232  | 5.65E-55  | postive  |
| PRDX1          | PSMA3-AS1  | -0.408464956 | 4.33E-23  | negative |
| MAPK8          | PSMA3-AS1  | 0.473466187  | 1.82E-31  | postive  |
| LINC00472      | PSMA3-AS1  | 0.527668496  | 5.75E-40  | postive  |
| ATM            | PSMA3-AS1  | 0.582006915  | 3.48E-50  | postive  |
| TAZ            | PSMA3-AS1  | 0.512263416  | 2.15E-37  | postive  |
| FBXW7          | PSMA3-AS1  | 0.545229666  | 4.57E-43  | postive  |
| BLOC1S5-TXNDC5 | AC083964.1 | 0.413857712  | 1.02E-23  | postive  |
| HMGB1          | AC083964.1 | 0.433916866  | 3.72E-26  | postive  |
| ZEB1           | AC083964.1 | 0.496249015  | 7.45E-35  | postive  |
| EPAS1          | AC083964.1 | 0.526683595  | 8.47E-40  | postive  |
| HELLS          | AC068790.4 | 0.492459174  | 2.84E-34  | postive  |
| TUBE1          | AC068790.4 | 0.460040647  | 1.39E-29  | postive  |
| ALOX12         | AC068790.4 | 0.454698519  | 7.37E-29  | postive  |
| GABPB1         | AC068790.4 | 0.552123024  | 2.47E-44  | postive  |
| MAPK8          | AC068790.4 | 0.429594067  | 1.29E-25  | postive  |
| LINC00472      | AC068790.4 | 0.759476537  | 2.41E-102 | postive  |
| ATM            | AC068790.4 | 0.707071135  | 7.44E-83  | postive  |
| FBXW7          | AC068790.4 | 0.482497778  | 8.87E-33  | postive  |
| TFAP2C         | AC124017.1 | 0.593507452  | 1.33E-52  | postive  |
| HBA1           | AC124017.1 | 0.47964629   | 2.33E-32  | postive  |
| MAPK1          | LINC02747  | 0.475529687  | 9.21E-32  | postive  |
| ALOX12         | AC024560.3 | 0.418929308  | 2.56E-24  | postive  |
| FANCD2         | AC010319.4 | 0.458997498  | 1.93E-29  | postive  |
| HELLS          | AC010319.4 | 0.422300408  | 1.01E-24  | postive  |
| BRD4           | AC010319.4 | 0.439964602  | 6.36E-27  | postive  |
| ZNF419         | AC010319.4 | 0.501393045  | 1.18E-35  | postive  |
| TUBE1          | AC010319.4 | 0.480600876  | 1.69E-32  | postive  |
| ALOX12         | AC010319.4 | 0.647444578  | 2.34E-65  | postive  |
| TAZ            | AC010319.4 | 0.520611119  | 9.01E-39  | postive  |
| ISCU           | AL049555.1 | 0.509922324  | 5.16E-37  | postive  |
| KLHL24         | AL049555.1 | 0.533077332  | 6.67E-41  | postive  |
| GABARAPL1      | AL049555.1 | 0.64236722   | 4.78E-64  | postive  |
| LINC00472      | AL049555.1 | 0.55694028   | 3.09E-45  | postive  |
| LPIN1          | AL049555.1 | 0.616817651  | 8.23E-58  | postive  |
| BRD4           | AC087623.1 | 0.441501027  | 4.04E-27  | postive  |
| TUBE1          | AC087623.1 | 0.411049324  | 2.17E-23  | postive  |
| ALOX12         | AC087623.1 | 0.428875749  | 1.58E-25  | postive  |
| TAZ            | AC087623.1 | 0.472400029  | 2.59E-31  | postive  |
| FANCD2         | SLC16A1-AS | 0.442449377  | 3.04E-27  | postive  |
| HELLS          | SLC16A1-AS | 0.546145663  | 3.11E-43  | postive  |
| TUBE1          | SLC16A1-AS | 0.401458181  | 2.73E-22  | postive  |
| ALOX12         | SLC16A1-AS | 0.567777513  | 2.52E-47  | postive  |
| ATM            | SLC16A1-AS | 0.415874465  | 5.90E-24  | postive  |
| FBXW7          | SLC16A1-AS | 0.439371931  | 7.57E-27  | postive  |
| TFAP2C         | AL109741.1 | 0.410401869  | 2.59E-23  | postive  |
| HBA1           | AL109741.1 | 0.409402767  | 3.38E-23  | postive  |
| EPAS1          | AL109741.1 | 0.408043994  | 4.84E-23  | postive  |
| ZNF419         | AC004918.1 | 0.45972536   | 1.53E-29  | postive  |
| VEGFA          | AC004918.1 | 0.479910671  | 2.13E-32  | postive  |



|           |            |              |           |          |
|-----------|------------|--------------|-----------|----------|
| TUBE1     | AC004918.1 | 0.501366973  | 1.19E-35  | postive  |
| ALOX12    | AC004918.1 | 0.435222001  | 2.55E-26  | postive  |
| PHKG2     | AC004918.1 | 0.453292103  | 1.14E-28  | postive  |
| TAZ       | AC004918.1 | 0.648127751  | 1.55E-65  | postive  |
| MTOR      | AC005670.3 | 0.530249305  | 2.07E-40  | postive  |
| OXSRI     | AC005670.3 | 0.418872147  | 2.60E-24  | postive  |
| MAFG      | AC005670.3 | 0.415574373  | 6.41E-24  | postive  |
| MAPK14    | AC005670.3 | 0.475780279  | 8.48E-32  | postive  |
| ALOX12    | AC005670.3 | 0.444904717  | 1.46E-27  | postive  |
| IREB2     | AC005670.3 | 0.588317162  | 1.69E-51  | postive  |
| SP1       | AC005670.3 | 0.42201096   | 1.09E-24  | postive  |
| PIK3CA    | AC005670.3 | 0.444351045  | 1.73E-27  | postive  |
| BECN1     | AC005670.3 | 0.441299008  | 4.28E-27  | postive  |
| ULK2      | AC005670.3 | 0.492265537  | 3.04E-34  | postive  |
| MAPK8     | AC005670.3 | 0.482612217  | 8.53E-33  | postive  |
| PRKAA2    | AC005670.3 | 0.468524927  | 9.18E-31  | postive  |
| ATM       | AC005670.3 | 0.546560918  | 2.62E-43  | postive  |
| TFAP2C    | AC011477.3 | 0.540865699  | 2.80E-42  | postive  |
| HBA1      | AC011477.3 | 0.469894705  | 5.88E-31  | postive  |
| OXSRI     | EMX2OS     | 0.43684709   | 1.59E-26  | postive  |
| FTL       | EMX2OS     | -0.407249217 | 5.98E-23  | negative |
| MAPK1     | EMX2OS     | 0.41928561   | 2.32E-24  | postive  |
| BID       | EMX2OS     | -0.488434065 | 1.16E-33  | negative |
| PEBP1     | EMX2OS     | 0.406401155  | 7.48E-23  | postive  |
| MAPK8     | EMX2OS     | 0.493539177  | 1.94E-34  | postive  |
| PRKAA2    | EMX2OS     | 0.439482445  | 7.33E-27  | postive  |
| SIRT1     | EMX2OS     | 0.436833088  | 1.59E-26  | postive  |
| ALOX12    | HOXC-AS2   | 0.422691616  | 9.02E-25  | postive  |
| TAZ       | HOXC-AS2   | 0.436003455  | 2.03E-26  | postive  |
| HAMP      | LINC01111  | 0.415676962  | 6.23E-24  | postive  |
| KLHL24    | AC097504.2 | 0.515075694  | 7.46E-38  | postive  |
| LINC00472 | AC097504.2 | 0.770926121  | 2.78E-107 | postive  |
| LPIN1     | AC097504.2 | 0.444600345  | 1.60E-27  | postive  |
| HELLS     | AC092794.1 | 0.470225005  | 5.28E-31  | postive  |
| ZNF419    | AC092794.1 | 0.445571055  | 1.20E-27  | postive  |
| KLHL24    | AC092794.1 | 0.412730439  | 1.38E-23  | postive  |
| TUBE1     | AC092794.1 | 0.582414996  | 2.87E-50  | postive  |
| ALOX12    | AC092794.1 | 0.430735867  | 9.30E-26  | postive  |
| GABPB1    | AC092794.1 | 0.565154951  | 8.21E-47  | postive  |
| MAPK8     | AC092794.1 | 0.410602123  | 2.45E-23  | postive  |
| LINC00472 | AC092794.1 | 0.724952788  | 5.39E-89  | postive  |
| ATM       | AC092794.1 | 0.634848484  | 3.76E-62  | postive  |
| FBXW7     | AC092794.1 | 0.455783336  | 5.26E-29  | postive  |
| TFAP2C    | LINC02427  | 0.464869995  | 2.98E-30  | postive  |
| IREB2     | AC244517.7 | 0.412698701  | 1.40E-23  | postive  |
| PIK3CA    | AC244517.7 | 0.405168808  | 1.03E-22  | postive  |
| ATM       | AC244517.7 | 0.414201928  | 9.30E-24  | postive  |
| BACH1     | AC244517.7 | 0.410456849  | 2.55E-23  | postive  |
| PHKG2     | AP000781.1 | 0.45178586   | 1.81E-28  | postive  |
| TAZ       | AP000781.1 | 0.423624886  | 6.95E-25  | postive  |
| TFAP2C    | AC092809.2 | 0.561223214  | 4.72E-46  | postive  |
| HBA1      | AC092809.2 | 0.524326326  | 2.13E-39  | postive  |
| TFAP2C    | AC011498.1 | 0.581396517  | 4.65E-50  | postive  |
| HBA1      | AC011498.1 | 0.521298253  | 6.91E-39  | postive  |
| ZNF419    | AC135050.5 | 0.437392927  | 1.35E-26  | postive  |
| KLHL24    | AC135050.5 | 0.445309881  | 1.29E-27  | postive  |
| TUBE1     | AC135050.5 | 0.473240704  | 1.96E-31  | postive  |
| SETD1B    | AC135050.5 | 0.417478306  | 3.81E-24  | postive  |

|           |            |             |           |         |
|-----------|------------|-------------|-----------|---------|
| ALOX12    | AC135050.5 | 0.544355116 | 6.59E-43  | postive |
| IREB2     | AC135050.5 | 0.430310639 | 1.05E-25  | postive |
| MAPK8     | AC135050.5 | 0.416023777 | 5.67E-24  | postive |
| LINC00472 | AC135050.5 | 0.642646806 | 4.05E-64  | postive |
| LPIN1     | AC135050.5 | 0.455870399 | 5.12E-29  | postive |
| ATM       | AC135050.5 | 0.499386646 | 2.43E-35  | postive |
| PHKG2     | AL596223.2 | 0.534946603 | 3.14E-41  | postive |
| TAZ       | AL596223.2 | 0.529274695 | 3.04E-40  | postive |
| PHKG2     | TONSL-AS1  | 0.453179937 | 1.18E-28  | postive |
| FANCD2    | MCM3AP-AS  | 0.404273413 | 1.31E-22  | postive |
| HELLS     | MCM3AP-AS  | 0.564228434 | 1.24E-46  | postive |
| ZNF419    | MCM3AP-AS  | 0.598444232 | 1.14E-53  | postive |
| TUBE1     | MCM3AP-AS  | 0.614106289 | 3.50E-57  | postive |
| SETD1B    | MCM3AP-AS  | 0.436601113 | 1.71E-26  | postive |
| ALOX12    | MCM3AP-AS  | 0.707317027 | 6.17E-83  | postive |
| GABPB1    | MCM3AP-AS  | 0.588167341 | 1.82E-51  | postive |
| MAPK8     | MCM3AP-AS  | 0.459974484 | 1.42E-29  | postive |
| LINC00472 | MCM3AP-AS  | 0.612029738 | 1.05E-56  | postive |
| ATM       | MCM3AP-AS  | 0.658276402 | 3.07E-68  | postive |
| FBXW7     | MCM3AP-AS  | 0.554304515 | 9.67E-45  | postive |
| HELLS     | AL109614.1 | 0.403623175 | 1.55E-22  | postive |
| ZNF419    | AL109614.1 | 0.414467231 | 8.65E-24  | postive |
| KLHL24    | AL109614.1 | 0.562587531 | 2.58E-46  | postive |
| TUBE1     | AL109614.1 | 0.43493398  | 2.77E-26  | postive |
| IREB2     | AL109614.1 | 0.486111723 | 2.58E-33  | postive |
| GABPB1    | AL109614.1 | 0.548231744 | 1.29E-43  | postive |
| PIK3CA    | AL109614.1 | 0.493863464 | 1.73E-34  | postive |
| KRAS      | AL109614.1 | 0.43686285  | 1.58E-26  | postive |
| ATG7      | AL109614.1 | 0.406071902 | 8.16E-23  | postive |
| MAPK8     | AL109614.1 | 0.454660412 | 7.46E-29  | postive |
| LINC00472 | AL109614.1 | 0.904946481 | 2.06E-201 | postive |
| LPIN1     | AL109614.1 | 0.438276109 | 1.05E-26  | postive |
| ATM       | AL109614.1 | 0.649834272 | 5.53E-66  | postive |
| FBXW7     | AL109614.1 | 0.459620684 | 1.58E-29  | postive |
| ALOX12    | AC027237.3 | 0.43264006  | 5.38E-26  | postive |
| HELLS     | AL162274.2 | 0.416813196 | 4.57E-24  | postive |
| ZNF419    | AL162274.2 | 0.541184699 | 2.46E-42  | postive |
| VEGFA     | AL162274.2 | 0.487508903 | 1.59E-33  | postive |
| TUBE1     | AL162274.2 | 0.554965105 | 7.27E-45  | postive |
| SETD1B    | AL162274.2 | 0.420452089 | 1.68E-24  | postive |
| ALOX12    | AL162274.2 | 0.709036364 | 1.66E-83  | postive |
| ATM       | AL162274.2 | 0.478473132 | 3.45E-32  | postive |
| TAZ       | AL162274.2 | 0.50960519  | 5.80E-37  | postive |
| FBXW7     | AL162274.2 | 0.438365571 | 1.02E-26  | postive |
| TFAP2C    | AC011462.3 | 0.588750231 | 1.37E-51  | postive |
| HBA1      | AC011462.3 | 0.529915663 | 2.36E-40  | postive |
| HELLS     | GABPB1-AS1 | 0.515732854 | 5.82E-38  | postive |
| ZNF419    | GABPB1-AS1 | 0.566884003 | 3.78E-47  | postive |
| TUBE1     | GABPB1-AS1 | 0.543524366 | 9.31E-43  | postive |
| ALOX12    | GABPB1-AS1 | 0.658139965 | 3.34E-68  | postive |
| GABPB1    | GABPB1-AS1 | 0.608618428 | 6.26E-56  | postive |
| LINC00472 | GABPB1-AS1 | 0.524596631 | 1.92E-39  | postive |
| ATM       | GABPB1-AS1 | 0.614263552 | 3.22E-57  | postive |
| FBXW7     | GABPB1-AS1 | 0.487334361 | 1.69E-33  | postive |
| ZNF419    | AL359220.1 | 0.417024982 | 4.31E-24  | postive |
| KLHL24    | AL359220.1 | 0.555861202 | 4.93E-45  | postive |
| IREB2     | AL359220.1 | 0.469429225 | 6.85E-31  | postive |
| GABPB1    | AL359220.1 | 0.559766739 | 8.96E-46  | postive |

|           |            |             |           |         |
|-----------|------------|-------------|-----------|---------|
| PIK3CA    | AL359220.1 | 0.487774681 | 1.45E-33  | postive |
| KRAS      | AL359220.1 | 0.418134878 | 3.18E-24  | postive |
| MAPK8     | AL359220.1 | 0.440517795 | 5.40E-27  | postive |
| LINC00472 | AL359220.1 | 0.857804844 | 2.39E-157 | postive |
| PRKAA1    | AL359220.1 | 0.416942171 | 4.41E-24  | postive |
| LPIN1     | AL359220.1 | 0.483317101 | 6.71E-33  | postive |
| ATM       | AL359220.1 | 0.48844551  | 1.15E-33  | postive |
| FBXW7     | AL359220.1 | 0.441261841 | 4.33E-27  | postive |
| HELLS     | OPA1-AS1   | 0.429099707 | 1.48E-25  | postive |
| KLHL24    | OPA1-AS1   | 0.560096878 | 7.75E-46  | postive |
| IREB2     | OPA1-AS1   | 0.45224916  | 1.57E-28  | postive |
| GABPB1    | OPA1-AS1   | 0.540723682 | 2.97E-42  | postive |
| PIK3CA    | OPA1-AS1   | 0.492436713 | 2.86E-34  | postive |
| KRAS      | OPA1-AS1   | 0.400136914 | 3.84E-22  | postive |
| MAPK8     | OPA1-AS1   | 0.418667928 | 2.75E-24  | postive |
| LINC00472 | OPA1-AS1   | 0.92529283  | 2.85E-228 | postive |
| ATM       | OPA1-AS1   | 0.582478876 | 2.78E-50  | postive |
| FBXW7     | OPA1-AS1   | 0.428364305 | 1.83E-25  | postive |
| HELLS     | AC012181.2 | 0.41239837  | 1.51E-23  | postive |
| ZNF419    | AC012181.2 | 0.487286403 | 1.72E-33  | postive |
| KLHL24    | AC012181.2 | 0.475183434 | 1.03E-31  | postive |
| TUBE1     | AC012181.2 | 0.567798211 | 2.50E-47  | postive |
| ALOX12    | AC012181.2 | 0.499567665 | 2.27E-35  | postive |
| IREB2     | AC012181.2 | 0.460464299 | 1.21E-29  | postive |
| GABPB1    | AC012181.2 | 0.557628052 | 2.29E-45  | postive |
| PIK3CA    | AC012181.2 | 0.456109923 | 4.75E-29  | postive |
| ATG7      | AC012181.2 | 0.421894984 | 1.13E-24  | postive |
| MAPK8     | AC012181.2 | 0.4781854   | 3.80E-32  | postive |
| LINC00472 | AC012181.2 | 0.631226689 | 2.95E-61  | postive |
| ATM       | AC012181.2 | 0.716817124 | 3.84E-86  | postive |
| FBXW7     | AC012181.2 | 0.575827604 | 6.33E-49  | postive |
| TFAP2C    | LINC01220  | 0.486875158 | 1.98E-33  | postive |
| FANCD2    | AC091057.1 | 0.765067449 | 1.01E-104 | postive |
| HELLS     | AC091057.1 | 0.707279945 | 6.35E-83  | postive |
| PML       | AC091057.1 | 0.408376249 | 4.44E-23  | postive |
| BRD4      | AC091057.1 | 0.410928488 | 2.25E-23  | postive |
| ZNF419    | AC091057.1 | 0.431398889 | 7.69E-26  | postive |
| ZFP69B    | AC091057.1 | 0.468647513 | 8.83E-31  | postive |
| ALOX12    | AC091057.1 | 0.512011689 | 2.36E-37  | postive |
| RRM2      | AC091057.1 | 0.519628592 | 1.31E-38  | postive |
| GABPB1    | AC091057.1 | 0.422044567 | 1.08E-24  | postive |
| AURKA     | AC091057.1 | 0.454299728 | 8.34E-29  | postive |
| IFNG      | AC091057.1 | 0.418126733 | 3.19E-24  | postive |
| ATM       | AC091057.1 | 0.458976491 | 1.94E-29  | postive |
| FBXW7     | AC091057.1 | 0.402544    | 2.06E-22  | postive |
| ISCU      | COLCA1     | 0.432066526 | 6.35E-26  | postive |
| KLHL24    | COLCA1     | 0.582954574 | 2.22E-50  | postive |
| GABARAPL1 | COLCA1     | 0.547294243 | 1.92E-43  | postive |
| LINC00472 | COLCA1     | 0.646639487 | 3.79E-65  | postive |
| LPIN1     | COLCA1     | 0.506412299 | 1.89E-36  | postive |
| HSPB1     | LIPE-AS1   | 0.488569009 | 1.10E-33  | postive |
| RPL8      | LIPE-AS1   | 0.408414223 | 4.39E-23  | postive |
| HBA1      | LIPE-AS1   | 0.765958358 | 4.18E-105 | postive |
| HRAS      | LIPE-AS1   | 0.712130414 | 1.52E-84  | postive |
| MAP1LC3A  | LIPE-AS1   | 0.489351299 | 8.42E-34  | postive |
| EGLN2     | LIPE-AS1   | 0.84002684  | 1.01E-144 | postive |
| HELLS     | AL049552.1 | 0.55512094  | 6.80E-45  | postive |
| ZNF419    | AL049552.1 | 0.423950194 | 6.35E-25  | postive |

|           |            |              |          |          |
|-----------|------------|--------------|----------|----------|
| TUBE1     | AL049552.1 | 0.597140286  | 2.19E-53 | postive  |
| ALOX12    | AL049552.1 | 0.550945582  | 4.09E-44 | postive  |
| GABPB1    | AL049552.1 | 0.547940157  | 1.46E-43 | postive  |
| MAPK8     | AL049552.1 | 0.418789856  | 2.66E-24 | postive  |
| LINC00472 | AL049552.1 | 0.607256289  | 1.27E-55 | postive  |
| ATM       | AL049552.1 | 0.751033362  | 7.06E-99 | postive  |
| FBXW7     | AL049552.1 | 0.53691935   | 1.41E-41 | postive  |
| ARRDC3    | AC123595.1 | 0.490006324  | 6.70E-34 | postive  |
| ATM       | AC123595.1 | 0.446265468  | 9.71E-28 | postive  |
| MT3       | AC009549.1 | 0.405128637  | 1.05E-22 | postive  |
| SLC2A6    | AC009549.1 | 0.431011933  | 8.59E-26 | postive  |
| HSPB1     | MUC12-AS1  | 0.42574337   | 3.84E-25 | postive  |
| PHKG2     | MUC12-AS1  | 0.45994377   | 1.43E-29 | postive  |
| ZNF419    | PAN3-AS1   | 0.556741725  | 3.36E-45 | postive  |
| TUBE1     | PAN3-AS1   | 0.560664175  | 6.04E-46 | postive  |
| SETD1B    | PAN3-AS1   | 0.451217017  | 2.16E-28 | postive  |
| ALOX12    | PAN3-AS1   | 0.629790633  | 6.64E-61 | postive  |
| GABPB1    | PAN3-AS1   | 0.540599175  | 3.13E-42 | postive  |
| ATM       | PAN3-AS1   | 0.406694222  | 6.93E-23 | postive  |
| TAZ       | PAN3-AS1   | 0.530655743  | 1.76E-40 | postive  |
| GPX4      | LINC02166  | 0.467033677  | 1.49E-30 | postive  |
| HSPB1     | LINC02166  | 0.409820129  | 3.02E-23 | postive  |
| EIF2S1    | LINC02166  | -0.474074384 | 1.49E-31 | negative |
| EIF2AK4   | LINC02166  | -0.417401754 | 3.89E-24 | negative |
| PIK3CA    | LINC02166  | -0.434417967 | 3.22E-26 | negative |
| PHKG2     | LINC02166  | 0.556979027  | 3.03E-45 | postive  |
| PRKAA1    | LINC02166  | -0.418392552 | 2.96E-24 | negative |
| TAZ       | LINC02166  | 0.404877039  | 1.12E-22 | postive  |
| MUC1      | LHX1-DT    | 0.431412476  | 7.66E-26 | postive  |
| ZNF419    | AC048341.1 | 0.511539796  | 2.82E-37 | postive  |
| TUBE1     | AC048341.1 | 0.47614994   | 7.50E-32 | postive  |
| SETD1B    | AC048341.1 | 0.425793271  | 3.78E-25 | postive  |
| ALOX12    | AC048341.1 | 0.516784818  | 3.90E-38 | postive  |
| PHKG2     | AC048341.1 | 0.476016393  | 7.84E-32 | postive  |
| TAZ       | AC048341.1 | 0.563275087  | 1.90E-46 | postive  |
| FBXW7     | AC048341.1 | 0.428379545  | 1.82E-25 | postive  |
| SLC3A2    | LINC00885  | 0.435195208  | 2.57E-26 | postive  |
| ISCU      | LINC00885  | 0.405582784  | 9.28E-23 | postive  |
| CHAC1     | LINC00885  | 0.641237127  | 9.29E-64 | postive  |
| DDIT3     | LINC00885  | 0.534830042  | 3.29E-41 | postive  |
| SLC2A8    | LINC00885  | 0.448919472  | 4.35E-28 | postive  |
| ATG4D     | LINC00885  | 0.505290893  | 2.85E-36 | postive  |
| MAP1LC3A  | LINC00885  | 0.594917964  | 6.63E-53 | postive  |
| GABARAPL1 | LINC00885  | 0.55492717   | 7.39E-45 | postive  |
| WIPI2     | LINC00885  | 0.425154035  | 4.53E-25 | postive  |
| LPIN1     | LINC00885  | 0.41435591   | 8.92E-24 | postive  |
| HELLS     | AC004908.2 | 0.455502794  | 5.74E-29 | postive  |
| ZNF419    | AC004908.2 | 0.506911467  | 1.57E-36 | postive  |
| KLHL24    | AC004908.2 | 0.453480414  | 1.07E-28 | postive  |
| TUBE1     | AC004908.2 | 0.601092776  | 2.99E-54 | postive  |
| ALOX12    | AC004908.2 | 0.540497592  | 3.26E-42 | postive  |
| GABPB1    | AC004908.2 | 0.558455293  | 1.59E-45 | postive  |
| MAPK8     | AC004908.2 | 0.426271939  | 3.31E-25 | postive  |
| LINC00472 | AC004908.2 | 0.750291737  | 1.40E-98 | postive  |
| ATM       | AC004908.2 | 0.589037808  | 1.19E-51 | postive  |
| FBXW7     | AC004908.2 | 0.436631872  | 1.69E-26 | postive  |
| HSF1      | AC103706.1 | 0.505584832  | 2.56E-36 | postive  |
| FANCD2    | AC103706.1 | 0.404256837  | 1.31E-22 | postive  |

|           |            |              |          |          |
|-----------|------------|--------------|----------|----------|
| CHAC1     | AC103706.1 | 0.479971582  | 2.09E-32 | postive  |
| CARS1     | AC103706.1 | 0.405025175  | 1.07E-22 | postive  |
| NCOA4     | AC103706.1 | -0.415481363 | 6.57E-24 | negative |
| PHKG2     | AC103706.1 | 0.618441228  | 3.44E-58 | postive  |
| TAZ       | AC103706.1 | 0.554120822  | 1.05E-44 | postive  |
| ALB       | LINC02637  | 0.445668777  | 1.16E-27 | postive  |
| TFR2      | LINC02637  | 0.41432565   | 8.99E-24 | postive  |
| RPL8      | TRIM52-AS1 | 0.464357021  | 3.52E-30 | postive  |
| HELLS     | AL157871.5 | 0.512800547  | 1.76E-37 | postive  |
| ZNF419    | AL157871.5 | 0.450343957  | 2.82E-28 | postive  |
| TUBE1     | AL157871.5 | 0.441822018  | 3.67E-27 | postive  |
| ALOX12    | AL157871.5 | 0.589162654  | 1.12E-51 | postive  |
| GABPB1    | AL157871.5 | 0.467124718  | 1.44E-30 | postive  |
| DUOX1     | AL157871.5 | 0.408507399  | 4.28E-23 | postive  |
| LINC00472 | AL157871.5 | 0.492879262  | 2.45E-34 | postive  |
| ATM       | AL157871.5 | 0.550289703  | 5.40E-44 | postive  |
| FBXW7     | AL157871.5 | 0.484179751  | 5.00E-33 | postive  |
| HELLS     | AL031670.1 | 0.491245624  | 4.35E-34 | postive  |
| BRD4      | AL031670.1 | 0.422709438  | 8.98E-25 | postive  |
| ZNF419    | AL031670.1 | 0.602341362  | 1.59E-54 | postive  |
| VEGFA     | AL031670.1 | 0.445018992  | 1.41E-27 | postive  |
| TUBE1     | AL031670.1 | 0.598115134  | 1.34E-53 | postive  |
| SETD1B    | AL031670.1 | 0.516728821  | 3.98E-38 | postive  |
| ALOX12    | AL031670.1 | 0.630474579  | 4.52E-61 | postive  |
| GABPB1    | AL031670.1 | 0.565705641  | 6.41E-47 | postive  |
| MAPK8     | AL031670.1 | 0.41529309   | 6.91E-24 | postive  |
| LINC00472 | AL031670.1 | 0.511295455  | 3.09E-37 | postive  |
| ATM       | AL031670.1 | 0.609275042  | 4.45E-56 | postive  |
| YY1AP1    | AL031670.1 | 0.418435484  | 2.93E-24 | postive  |
| FBXW7     | AL031670.1 | 0.507243299  | 1.39E-36 | postive  |
| BRD4      | AC114730.3 | 0.437320633  | 1.38E-26 | postive  |
| ZNF419    | AC114730.3 | 0.515869832  | 5.52E-38 | postive  |
| VEGFA     | AC114730.3 | 0.565340411  | 7.56E-47 | postive  |
| TUBE1     | AC114730.3 | 0.534027295  | 4.55E-41 | postive  |
| SETD1B    | AC114730.3 | 0.462616442  | 6.13E-30 | postive  |
| DRD4      | AC114730.3 | 0.47759693   | 4.63E-32 | postive  |
| ALOX12    | AC114730.3 | 0.628379766  | 1.46E-60 | postive  |
| PHKG2     | AC114730.3 | 0.528766954  | 3.72E-40 | postive  |
| TAZ       | AC114730.3 | 0.739557602  | 2.21E-94 | postive  |
| HELLS     | AC090510.2 | 0.499373775  | 2.44E-35 | postive  |
| ZNF419    | AC090510.2 | 0.593653519  | 1.24E-52 | postive  |
| TUBE1     | AC090510.2 | 0.587223753  | 2.87E-51 | postive  |
| ALOX12    | AC090510.2 | 0.646235694  | 4.82E-65 | postive  |
| GABPB1    | AC090510.2 | 0.55921459   | 1.14E-45 | postive  |
| LINC00472 | AC090510.2 | 0.524057266  | 2.37E-39 | postive  |
| ATM       | AC090510.2 | 0.563941949  | 1.41E-46 | postive  |
| TAZ       | AC090510.2 | 0.403988175  | 1.41E-22 | postive  |
| FBXW7     | AC090510.2 | 0.502196333  | 8.81E-36 | postive  |
| CHMP5     | AL162171.1 | 0.43054033   | 9.84E-26 | postive  |
| KLHL24    | AL162171.1 | 0.496157717  | 7.70E-35 | postive  |
| IREB2     | AL162171.1 | 0.445872237  | 1.09E-27 | postive  |
| GABARAPL2 | AL162171.1 | 0.406058597  | 8.19E-23 | postive  |
| GABARAPL1 | AL162171.1 | 0.462381166  | 6.61E-30 | postive  |
| LPIN1     | AL162171.1 | 0.43458181   | 3.07E-26 | postive  |
| ISCU      | AC007342.4 | 0.55274275   | 1.89E-44 | postive  |
| ACSL3     | AC007342.4 | 0.406299451  | 7.69E-23 | postive  |
| KLHL24    | AC007342.4 | 0.533282055  | 6.14E-41 | postive  |
| CS        | AC007342.4 | 0.413089342  | 1.26E-23 | postive  |

|           |            |             |          |         |
|-----------|------------|-------------|----------|---------|
| ATG4D     | AC007342.4 | 0.42394321  | 6.36E-25 | postive |
| GABARAPL1 | AC007342.4 | 0.617863874 | 4.69E-58 | postive |
| LINC00472 | AC007342.4 | 0.491906888 | 3.45E-34 | postive |
| LPIN1     | AC007342.4 | 0.576782856 | 4.06E-49 | postive |
| HELLS     | AC107884.1 | 0.416398994 | 5.12E-24 | postive |
| ZNF419    | AC107884.1 | 0.401312166 | 2.83E-22 | postive |
| TUBE1     | AC107884.1 | 0.550887027 | 4.19E-44 | postive |
| ALOX12    | AC107884.1 | 0.623563677 | 2.11E-59 | postive |
| IREB2     | AC107884.1 | 0.411481292 | 1.94E-23 | postive |
| GABPB1    | AC107884.1 | 0.43804755  | 1.12E-26 | postive |
| MAPK8     | AC107884.1 | 0.422881487 | 8.56E-25 | postive |
| LINC00472 | AC107884.1 | 0.52500721  | 1.63E-39 | postive |
| ATM       | AC107884.1 | 0.705484648 | 2.48E-82 | postive |
| FBXW7     | AC107884.1 | 0.417700901 | 3.58E-24 | postive |
| TFAP2C    | AC010422.2 | 0.523760319 | 2.66E-39 | postive |
| HBA1      | AC010422.2 | 0.474361711 | 1.36E-31 | postive |
| HELLS     | ZNF337-AS1 | 0.484200351 | 4.97E-33 | postive |
| TUBE1     | ZNF337-AS1 | 0.45894037  | 1.96E-29 | postive |
| ALOX12    | ZNF337-AS1 | 0.554545119 | 8.72E-45 | postive |
| IREB2     | ZNF337-AS1 | 0.404712174 | 1.17E-22 | postive |
| ULK2      | ZNF337-AS1 | 0.408502163 | 4.29E-23 | postive |
| MAPK8     | ZNF337-AS1 | 0.420317785 | 1.74E-24 | postive |
| LINC00472 | ZNF337-AS1 | 0.425166704 | 4.51E-25 | postive |
| ATM       | ZNF337-AS1 | 0.656939982 | 7.06E-68 | postive |
| FANCD2    | AC243960.1 | 0.449682192 | 3.45E-28 | postive |
| PML       | AC243960.1 | 0.401299889 | 2.84E-22 | postive |
| SLC2A6    | AC243960.1 | 0.424766102 | 5.05E-25 | postive |
| IFNG      | AC243960.1 | 0.589880251 | 7.90E-52 | postive |
| FBXW7     | AC243960.1 | 0.418681286 | 2.74E-24 | postive |
| HELLS     | LINC01767  | 0.480962891 | 1.49E-32 | postive |
| TUBE1     | LINC01767  | 0.407465396 | 5.65E-23 | postive |
| GABPB1    | LINC01767  | 0.476133406 | 7.54E-32 | postive |
| LINC00472 | LINC01767  | 0.515178107 | 7.18E-38 | postive |
| ATM       | LINC01767  | 0.650439513 | 3.83E-66 | postive |
| FBXW7     | LINC01767  | 0.475014074 | 1.09E-31 | postive |
| VEGFA     | AC006449.2 | 0.444060306 | 1.88E-27 | postive |
| TUBE1     | AC006449.2 | 0.459234905 | 1.79E-29 | postive |
| ALOX12    | AC006449.2 | 0.456312792 | 4.46E-29 | postive |
| GABPB1    | AC006449.2 | 0.449137533 | 4.07E-28 | postive |
| ZEB1      | AC006449.2 | 0.419051898 | 2.47E-24 | postive |
| MAPK8     | AC006449.2 | 0.403245045 | 1.71E-22 | postive |
| ATM       | AC006449.2 | 0.468828686 | 8.32E-31 | postive |
| ANGPTL7   | LINC00205  | 0.419856417 | 1.98E-24 | postive |
| ZNF419    | LINC00205  | 0.534802743 | 3.33E-41 | postive |
| TFAP2C    | LINC02544  | 0.481527733 | 1.23E-32 | postive |
| HBA1      | LINC02544  | 0.416373596 | 5.15E-24 | postive |
| FANCD2    | AP4B1-AS1  | 0.491321471 | 4.23E-34 | postive |
| HELLS     | AP4B1-AS1  | 0.566556488 | 4.38E-47 | postive |
| BRD4      | AP4B1-AS1  | 0.403411907 | 1.64E-22 | postive |
| ZNF419    | AP4B1-AS1  | 0.585560415 | 6.38E-51 | postive |
| TUBE1     | AP4B1-AS1  | 0.581006204 | 5.59E-50 | postive |
| SETD1B    | AP4B1-AS1  | 0.41334091  | 1.17E-23 | postive |
| ALOX12    | AP4B1-AS1  | 0.691047341 | 9.82E-78 | postive |
| GABPB1    | AP4B1-AS1  | 0.546406749 | 2.79E-43 | postive |
| LINC00472 | AP4B1-AS1  | 0.418500954 | 2.88E-24 | postive |
| ATM       | AP4B1-AS1  | 0.590375286 | 6.20E-52 | postive |
| FBXW7     | AP4B1-AS1  | 0.56244464  | 2.75E-46 | postive |
| HELLS     | AC078846.1 | 0.485539926 | 3.14E-33 | postive |

|           |            |             |          |         |
|-----------|------------|-------------|----------|---------|
| ZNF419    | AC078846.1 | 0.435465249 | 2.38E-26 | postive |
| TUBE1     | AC078846.1 | 0.559737778 | 9.08E-46 | postive |
| ALOX12    | AC078846.1 | 0.611076237 | 1.73E-56 | postive |
| GABPB1    | AC078846.1 | 0.51742341  | 3.06E-38 | postive |
| LINC00472 | AC078846.1 | 0.541499445 | 2.16E-42 | postive |
| ATM       | AC078846.1 | 0.644601253 | 1.28E-64 | postive |
| FBXW7     | AC078846.1 | 0.447754583 | 6.19E-28 | postive |
| FANCD2    | ATP2A1-AS1 | 0.52205935  | 5.15E-39 | postive |
| ASNS      | ATP2A1-AS1 | 0.401620338 | 2.61E-22 | postive |
| PSAT1     | ATP2A1-AS1 | 0.425904271 | 3.67E-25 | postive |
| SLC2A6    | ATP2A1-AS1 | 0.428006943 | 2.02E-25 | postive |
| STMN1     | ATP2A1-AS1 | 0.502103518 | 9.11E-36 | postive |
| RRM2      | ATP2A1-AS1 | 0.567467056 | 2.90E-47 | postive |
| AURKA     | ATP2A1-AS1 | 0.632363135 | 1.55E-61 | postive |
| SLC1A5    | ATP2A1-AS1 | 0.442830947 | 2.72E-27 | postive |
| CDKN2A    | ATP2A1-AS1 | 0.506015829 | 2.19E-36 | postive |
| TFAP2C    | AP001372.1 | 0.528348947 | 4.39E-40 | postive |
| HBA1      | AP001372.1 | 0.456556071 | 4.14E-29 | postive |
| EGLN2     | AC018529.1 | 0.493170673 | 2.21E-34 | postive |
| TFAP2C    | AC131097.3 | 0.546155554 | 3.10E-43 | postive |
| HBA1      | AC131097.3 | 0.51674184  | 3.96E-38 | postive |
| HELLS     | AL359697.1 | 0.464554036 | 3.30E-30 | postive |
| TFAP2C    | AL359697.1 | 0.470000518 | 5.68E-31 | postive |
| HBA1      | AL359697.1 | 0.436321497 | 1.85E-26 | postive |
| DUOX1     | AL359697.1 | 0.428075071 | 1.99E-25 | postive |
| ZNF419    | AP001021.2 | 0.417243418 | 4.06E-24 | postive |
| KLHL24    | AP001021.2 | 0.492447496 | 2.85E-34 | postive |
| TUBE1     | AP001021.2 | 0.425059048 | 4.65E-25 | postive |
| GABPB1    | AP001021.2 | 0.419273774 | 2.33E-24 | postive |
| LINC00472 | AP001021.2 | 0.747800591 | 1.38E-97 | postive |
| ATM       | AP001021.2 | 0.50415993  | 4.31E-36 | postive |
| BRD4      | AL022238.2 | 0.4755919   | 9.03E-32 | postive |
| ZNF419    | AL022238.2 | 0.488202471 | 1.25E-33 | postive |
| VEGFA     | AL022238.2 | 0.441228273 | 4.38E-27 | postive |
| TUBE1     | AL022238.2 | 0.443936168 | 1.95E-27 | postive |
| SETD1B    | AL022238.2 | 0.419097105 | 2.44E-24 | postive |
| ALOX12    | AL022238.2 | 0.581151624 | 5.22E-50 | postive |
| GABPB1    | AL022238.2 | 0.403907596 | 1.44E-22 | postive |
| ATM       | AL022238.2 | 0.436285812 | 1.87E-26 | postive |
| TAZ       | AL022238.2 | 0.40365726  | 1.54E-22 | postive |
| FBXW7     | AL022238.2 | 0.436800618 | 1.61E-26 | postive |
| FANCD2    | AP000763.3 | 0.425168988 | 4.51E-25 | postive |
| HELLS     | AP000763.3 | 0.465252957 | 2.64E-30 | postive |
| ALOX12    | AP000763.3 | 0.472810504 | 2.26E-31 | postive |
| TFAP2C    | AP000763.3 | 0.431474264 | 7.53E-26 | postive |
| DUOX1     | AP000763.3 | 0.421533579 | 1.25E-24 | postive |
| LINC00472 | AP000763.3 | 0.413047348 | 1.27E-23 | postive |
| FBXW7     | AP000763.3 | 0.426869907 | 2.79E-25 | postive |
| IL33      | MBNL1-AS1  | 0.510110469 | 4.81E-37 | postive |
| GABPB1    | MBNL1-AS1  | 0.440397434 | 5.60E-27 | postive |
| ZEB1      | MBNL1-AS1  | 0.441234697 | 4.37E-27 | postive |
| FANCD2    | AC022126.1 | 0.451515259 | 1.97E-28 | postive |
| GCH1      | AC022126.1 | 0.432187671 | 6.13E-26 | postive |
| STMN1     | AC022126.1 | 0.401193265 | 2.92E-22 | postive |
| RRM2      | AC022126.1 | 0.526328277 | 9.74E-40 | postive |
| AURKA     | AC022126.1 | 0.45885414  | 2.01E-29 | postive |
| IFNG      | AC022126.1 | 0.554817708 | 7.75E-45 | postive |
| HELLS     | AL591848.3 | 0.417087169 | 4.24E-24 | postive |

|           |            |             |           |         |
|-----------|------------|-------------|-----------|---------|
| GABPB1    | AL591848.3 | 0.488487935 | 1.14E-33  | postive |
| MAPK8     | AL591848.3 | 0.437996611 | 1.13E-26  | postive |
| LINC00472 | AL591848.3 | 0.486703139 | 2.10E-33  | postive |
| ATM       | AL591848.3 | 0.595520765 | 4.91E-53  | postive |
| BRD4      | AC145285.6 | 0.405167269 | 1.04E-22  | postive |
| ZNF419    | AC145285.6 | 0.457933494 | 2.69E-29  | postive |
| TUBE1     | AC145285.6 | 0.406019656 | 8.27E-23  | postive |
| DRD4      | AC145285.6 | 0.421885097 | 1.13E-24  | postive |
| ALOX12    | AC145285.6 | 0.518341238 | 2.15E-38  | postive |
| PHKG2     | AC145285.6 | 0.603757492 | 7.71E-55  | postive |
| EGLN2     | AC145285.6 | 0.432929635 | 4.95E-26  | postive |
| TAZ       | AC145285.6 | 0.688923785 | 4.42E-77  | postive |
| ISCU      | LINC01187  | 0.653108888 | 7.52E-67  | postive |
| ACSL3     | LINC01187  | 0.426356388 | 3.23E-25  | postive |
| DDIT3     | LINC01187  | 0.445680694 | 1.16E-27  | postive |
| KLHL24    | LINC01187  | 0.506679659 | 1.71E-36  | postive |
| ATG4D     | LINC01187  | 0.512831063 | 1.74E-37  | postive |
| GABARAPL1 | LINC01187  | 0.727044048 | 9.58E-90  | postive |
| LINC00472 | LINC01187  | 0.402825705 | 1.91E-22  | postive |
| BAP1      | LINC01187  | 0.410197088 | 2.73E-23  | postive |
| LPIN1     | LINC01187  | 0.58811811  | 1.86E-51  | postive |
| FANCD2    | BET1-AS1   | 0.404931704 | 1.10E-22  | postive |
| HELLS     | BET1-AS1   | 0.547992647 | 1.43E-43  | postive |
| TUBE1     | BET1-AS1   | 0.453271266 | 1.15E-28  | postive |
| ALOX12    | BET1-AS1   | 0.494283059 | 1.50E-34  | postive |
| GABPB1    | BET1-AS1   | 0.425272896 | 4.38E-25  | postive |
| ATM       | BET1-AS1   | 0.50980963  | 5.38E-37  | postive |
| FBXW7     | BET1-AS1   | 0.462312016 | 6.75E-30  | postive |
| HELLS     | DLGAP4-AS1 | 0.57338474  | 1.96E-48  | postive |
| ZNF419    | DLGAP4-AS1 | 0.498573693 | 3.25E-35  | postive |
| TUBE1     | DLGAP4-AS1 | 0.555552907 | 5.64E-45  | postive |
| ALOX12    | DLGAP4-AS1 | 0.581480014 | 4.47E-50  | postive |
| GABPB1    | DLGAP4-AS1 | 0.554755695 | 7.96E-45  | postive |
| LINC00472 | DLGAP4-AS1 | 0.572276233 | 3.26E-48  | postive |
| ATM       | DLGAP4-AS1 | 0.649233101 | 7.96E-66  | postive |
| FBXW7     | DLGAP4-AS1 | 0.539270372 | 5.40E-42  | postive |
| KLHL24    | AL161804.1 | 0.455204432 | 6.30E-29  | postive |
| HELLS     | AC012557.1 | 0.4844967   | 4.49E-33  | postive |
| KLHL24    | AC012557.1 | 0.508804218 | 7.81E-37  | postive |
| TUBE1     | AC012557.1 | 0.439970069 | 6.35E-27  | postive |
| IREB2     | AC012557.1 | 0.448233084 | 5.35E-28  | postive |
| GABPB1    | AC012557.1 | 0.586626598 | 3.82E-51  | postive |
| PIK3CA    | AC012557.1 | 0.465260794 | 2.63E-30  | postive |
| ATG7      | AC012557.1 | 0.436478244 | 1.77E-26  | postive |
| MAPK8     | AC012557.1 | 0.430012469 | 1.14E-25  | postive |
| LINC00472 | AC012557.1 | 0.861062314 | 7.58E-160 | postive |
| TGFBR1    | AC012557.1 | 0.400918315 | 3.14E-22  | postive |
| ATM       | AC012557.1 | 0.673048908 | 2.28E-72  | postive |
| FBXW7     | AC012557.1 | 0.446197855 | 9.91E-28  | postive |
| KLHL24    | PTPRJ-AS1  | 0.521525358 | 6.33E-39  | postive |
| GABPB1    | PTPRJ-AS1  | 0.43406868  | 3.56E-26  | postive |
| PIK3CA    | PTPRJ-AS1  | 0.423687647 | 6.83E-25  | postive |
| LINC00472 | PTPRJ-AS1  | 0.874666254 | 5.08E-171 | postive |
| HELLS     | AC040169.3 | 0.460814957 | 1.09E-29  | postive |
| KLHL24    | AC040169.3 | 0.436107161 | 1.97E-26  | postive |
| GABPB1    | AC040169.3 | 0.458409304 | 2.32E-29  | postive |
| LINC00472 | AC040169.3 | 0.792441773 | 2.18E-117 | postive |
| LPIN1     | AC040169.3 | 0.469391482 | 6.93E-31  | postive |



|                |            |              |          |          |
|----------------|------------|--------------|----------|----------|
| ATM            | AC040169.3 | 0.422490138  | 9.54E-25 | postive  |
| FBXW7          | AC040169.3 | 0.410038702  | 2.85E-23 | postive  |
| FANCD2         | LINC01943  | 0.404384551  | 1.27E-22 | postive  |
| PML            | LINC01943  | 0.459831442  | 1.48E-29 | postive  |
| SLC2A6         | LINC01943  | 0.546556978  | 2.62E-43 | postive  |
| IFNG           | LINC01943  | 0.498171107  | 3.75E-35 | postive  |
| ZNF419         | AL117379.1 | 0.551321275  | 3.48E-44 | postive  |
| TUBE1          | AL117379.1 | 0.492622767  | 2.68E-34 | postive  |
| ALOX12         | AL117379.1 | 0.503437415  | 5.61E-36 | postive  |
| GABPB1         | AL117379.1 | 0.423832235  | 6.56E-25 | postive  |
| NCOA4          | AL117379.1 | -0.403803429 | 1.48E-22 | negative |
| PHKG2          | AL117379.1 | 0.597742386  | 1.62E-53 | postive  |
| TAZ            | AL117379.1 | 0.70116058   | 6.31E-81 | postive  |
| ENPP2          | LINC01235  | 0.56707533   | 3.47E-47 | postive  |
| BLOC1S5-TXNDC5 | LINC01235  | 0.431731556  | 6.99E-26 | postive  |
| PHKG2          | AC091153.3 | 0.406697653  | 6.92E-23 | postive  |
| TAZ            | AC091153.3 | 0.417867015  | 3.42E-24 | postive  |
| ALOX12         | AC011005.4 | 0.520686705  | 8.75E-39 | postive  |
| TAZ            | AC011005.4 | 0.449658547  | 3.47E-28 | postive  |
| RB1            | AC104083.1 | 0.457195735  | 3.39E-29 | postive  |
| IL33           | AC104083.1 | 0.520437305  | 9.63E-39 | postive  |
| HMGB1          | AC104083.1 | 0.521940262  | 5.39E-39 | postive  |
| ZEB1           | AC104083.1 | 0.606951298  | 1.49E-55 | postive  |
| PRKAA1         | AC104083.1 | 0.402589197  | 2.03E-22 | postive  |
| EPAS1          | AC104083.1 | 0.497180721  | 5.35E-35 | postive  |
| SIRT1          | AC104083.1 | 0.443158742  | 2.46E-27 | postive  |
| RB1            | CASC2      | 0.52589825   | 1.15E-39 | postive  |
| HELLS          | CASC2      | 0.400038849  | 3.94E-22 | postive  |
| SP1            | CASC2      | 0.431703959  | 7.05E-26 | postive  |
| PRKAA2         | CASC2      | 0.529763722  | 2.51E-40 | postive  |
| ATM            | CASC2      | 0.547566529  | 1.71E-43 | postive  |
| HELLS          | AC063965.2 | 0.600768663  | 3.53E-54 | postive  |
| TUBE1          | AC063965.2 | 0.41363987   | 1.08E-23 | postive  |
| ALOX12         | AC063965.2 | 0.48967157   | 7.53E-34 | postive  |
| GABPB1         | AC063965.2 | 0.50133362   | 1.20E-35 | postive  |
| DUOX1          | AC063965.2 | 0.410535619  | 2.49E-23 | postive  |
| LINC00472      | AC063965.2 | 0.528906734  | 3.52E-40 | postive  |
| ATM            | AC063965.2 | 0.609912677  | 3.19E-56 | postive  |
| FBXW7          | AC063965.2 | 0.465650661  | 2.32E-30 | postive  |
| ANGPTL7        | LINC01546  | 0.598180941  | 1.30E-53 | postive  |
| HELLS          | AC005332.3 | 0.50318914   | 6.14E-36 | postive  |
| TUBE1          | AC005332.3 | 0.602528823  | 1.44E-54 | postive  |
| ALOX12         | AC005332.3 | 0.511979205  | 2.39E-37 | postive  |
| GABPB1         | AC005332.3 | 0.50751516   | 1.26E-36 | postive  |
| LINC00472      | AC005332.3 | 0.433899578  | 3.74E-26 | postive  |
| ATM            | AC005332.3 | 0.575349353  | 7.90E-49 | postive  |
| FBXW7          | AC005332.3 | 0.481742486  | 1.15E-32 | postive  |
| ZNF419         | AC005840.2 | 0.455043298  | 6.62E-29 | postive  |
| TUBE1          | AC005840.2 | 0.438217474  | 1.06E-26 | postive  |
| ALOX12         | AC005840.2 | 0.471412541  | 3.58E-31 | postive  |
| PHKG2          | AC005840.2 | 0.463732968  | 4.29E-30 | postive  |
| TAZ            | AC005840.2 | 0.630104521  | 5.56E-61 | postive  |
| HELLS          | AC090912.2 | 0.522940824  | 3.66E-39 | postive  |
| GABPB1         | AC090912.2 | 0.453031115  | 1.23E-28 | postive  |
| LINC00472      | AC090912.2 | 0.624404117  | 1.33E-59 | postive  |
| ATM            | AC090912.2 | 0.589578145  | 9.15E-52 | postive  |
| FBXW7          | AC090912.2 | 0.443429021  | 2.27E-27 | postive  |
| HELLS          | AL450384.1 | 0.400956649  | 3.11E-22 | postive  |

|           |            |              |           |          |
|-----------|------------|--------------|-----------|----------|
| KLHL24    | AL450384.1 | 0.517944592  | 2.51E-38  | postive  |
| TUBE1     | AL450384.1 | 0.41782671   | 3.46E-24  | postive  |
| GABPB1    | AL450384.1 | 0.524214963  | 2.23E-39  | postive  |
| PIK3CA    | AL450384.1 | 0.414825092  | 7.85E-24  | postive  |
| LINC00472 | AL450384.1 | 0.88365903   | 3.78E-179 | postive  |
| ATM       | AL450384.1 | 0.557763621  | 2.15E-45  | postive  |
| FBXW7     | AL450384.1 | 0.410067749  | 2.83E-23  | postive  |
| TFAP2C    | AC105020.5 | 0.547234425  | 1.97E-43  | postive  |
| HBA1      | AC105020.5 | 0.495827743  | 8.65E-35  | postive  |
| DUOX1     | AC105020.5 | 0.404662229  | 1.18E-22  | postive  |
| ZNF419    | AL158212.2 | 0.476778843  | 6.08E-32  | postive  |
| TUBE1     | AL158212.2 | 0.412481642  | 1.48E-23  | postive  |
| ALOX12    | AL158212.2 | 0.471309522  | 3.71E-31  | postive  |
| PHKG2     | AL158212.2 | 0.569759802  | 1.03E-47  | postive  |
| TAZ       | AL158212.2 | 0.695184925  | 5.04E-79  | postive  |
| HELLS     | AC010261.2 | 0.439760768  | 6.75E-27  | postive  |
| KLHL24    | AC010261.2 | 0.519541573  | 1.36E-38  | postive  |
| TUBE1     | AC010261.2 | 0.408084735  | 4.79E-23  | postive  |
| IREB2     | AC010261.2 | 0.442903906  | 2.66E-27  | postive  |
| GABPB1    | AC010261.2 | 0.54411089   | 7.30E-43  | postive  |
| PIK3CA    | AC010261.2 | 0.465349585  | 2.56E-30  | postive  |
| MAPK8     | AC010261.2 | 0.423204292  | 7.82E-25  | postive  |
| LINC00472 | AC010261.2 | 0.913370868  | 1.00E-211 | postive  |
| ATM       | AC010261.2 | 0.651766993  | 1.71E-66  | postive  |
| FBXW7     | AC010261.2 | 0.417661275  | 3.62E-24  | postive  |
| TUBE1     | AC135803.1 | 0.456879371  | 3.74E-29  | postive  |
| NOX1      | AC135803.1 | 0.52684607   | 7.95E-40  | postive  |
| BECN1     | AC135803.1 | -0.400977553 | 3.09E-22  | negative |
| TAZ       | AC135803.1 | 0.443766482  | 2.06E-27  | postive  |
| CXCL2     | AC104695.3 | 0.402272209  | 2.21E-22  | postive  |
| LINC00472 | AC104695.3 | 0.552251751  | 2.34E-44  | postive  |
| EGLN2     | AC026740.1 | 0.468405599  | 9.55E-31  | postive  |
| TAZ       | AC026740.1 | 0.400836476  | 3.20E-22  | postive  |
| ATG4D     | AL359513.1 | 0.498868027  | 2.92E-35  | postive  |
| TUBE1     | AC067945.2 | 0.452849976  | 1.30E-28  | postive  |
| ALOX12    | AC067945.2 | 0.487387163  | 1.66E-33  | postive  |
| GABPB1    | AC067945.2 | 0.423792189  | 6.64E-25  | postive  |
| ATM       | AC067945.2 | 0.456078967  | 4.80E-29  | postive  |
| TAZ       | AC067945.2 | 0.418244562  | 3.09E-24  | postive  |
| FBXW7     | AC067945.2 | 0.472812146  | 2.26E-31  | postive  |
| ALOX12    | AC010359.2 | 0.438340292  | 1.03E-26  | postive  |
| PHKG2     | AC010359.2 | 0.506293954  | 1.97E-36  | postive  |
| TAZ       | AC010359.2 | 0.524033565  | 2.39E-39  | postive  |
| LINC00472 | AC012467.2 | 0.487374739  | 1.67E-33  | postive  |
| HELLS     | AC114980.1 | 0.53997535   | 4.04E-42  | postive  |
| TUBE1     | AC114980.1 | 0.404271074  | 1.31E-22  | postive  |
| ALOX12    | AC114980.1 | 0.479480933  | 2.46E-32  | postive  |
| TFAP2C    | AC114980.1 | 0.423380213  | 7.45E-25  | postive  |
| HBA1      | AC114980.1 | 0.421880189  | 1.13E-24  | postive  |
| GABPB1    | AC114980.1 | 0.484981403  | 3.80E-33  | postive  |
| DUOX1     | AC114980.1 | 0.436014916  | 2.02E-26  | postive  |
| LINC00472 | AC114980.1 | 0.458558102  | 2.21E-29  | postive  |
| ATM       | AC114980.1 | 0.480604929  | 1.68E-32  | postive  |
| FBXW7     | AC114980.1 | 0.45224658   | 1.57E-28  | postive  |
| MTOR      | AL158212.3 | 0.481172256  | 1.39E-32  | postive  |
| IREB2     | AL158212.3 | 0.460789007  | 1.09E-29  | postive  |
| GABPB1    | AL158212.3 | 0.418077809  | 3.23E-24  | postive  |
| PIK3CA    | AL158212.3 | 0.406305809  | 7.67E-23  | postive  |

|                |            |             |           |         |
|----------------|------------|-------------|-----------|---------|
| MAPK8          | AL158212.3 | 0.469523587 | 6.64E-31  | postive |
| LINC00472      | AL158212.3 | 0.431663623 | 7.13E-26  | postive |
| ATM            | AL158212.3 | 0.540000388 | 4.00E-42  | postive |
| HELLS          | AC144548.1 | 0.440092704 | 6.12E-27  | postive |
| BRD4           | AC144548.1 | 0.409342919 | 3.43E-23  | postive |
| ZNF419         | AC144548.1 | 0.520555582 | 9.20E-39  | postive |
| TUBE1          | AC144548.1 | 0.600497794 | 4.05E-54  | postive |
| SETD1B         | AC144548.1 | 0.537122902 | 1.30E-41  | postive |
| ALOX12         | AC144548.1 | 0.593250739 | 1.51E-52  | postive |
| GABPB1         | AC144548.1 | 0.450325203 | 2.83E-28  | postive |
| LINC00472      | AC144548.1 | 0.505666192 | 2.48E-36  | postive |
| ATM            | AC144548.1 | 0.520467803 | 9.52E-39  | postive |
| TAZ            | AC144548.1 | 0.407201496 | 6.06E-23  | postive |
| FBXW7          | AC144548.1 | 0.435061673 | 2.67E-26  | postive |
| KLHL24         | AC068580.3 | 0.43667832  | 1.67E-26  | postive |
| GABARAPL1      | AC068580.3 | 0.469035622 | 7.78E-31  | postive |
| LPIN1          | AC068580.3 | 0.548011238 | 1.42E-43  | postive |
| BLOC1S5-TXNDC5 | AC025175.1 | 0.430387611 | 1.03E-25  | postive |
| IL33           | AC025175.1 | 0.504870575 | 3.32E-36  | postive |
| ZEB1           | AC025175.1 | 0.482185756 | 9.86E-33  | postive |
| HELLS          | AP000941.1 | 0.508263349 | 9.54E-37  | postive |
| ZNF419         | AP000941.1 | 0.460855112 | 1.07E-29  | postive |
| ZFP69B         | AP000941.1 | 0.415763056 | 6.08E-24  | postive |
| TUBE1          | AP000941.1 | 0.549710334 | 6.91E-44  | postive |
| SETD1B         | AP000941.1 | 0.419376229 | 2.26E-24  | postive |
| ALOX12         | AP000941.1 | 0.569744445 | 1.04E-47  | postive |
| GABPB1         | AP000941.1 | 0.560484246 | 6.53E-46  | postive |
| ZEB1           | AP000941.1 | 0.413690037 | 1.07E-23  | postive |
| MAPK8          | AP000941.1 | 0.458148563 | 2.51E-29  | postive |
| LINC00472      | AP000941.1 | 0.513221859 | 1.50E-37  | postive |
| ATM            | AP000941.1 | 0.687562561 | 1.15E-76  | postive |
| FBXW7          | AP000941.1 | 0.524189691 | 2.25E-39  | postive |
| ATF4           | TMEM44-AS  | 0.411620448 | 1.87E-23  | postive |
| ALOX12         | TMEM44-AS  | 0.460435095 | 1.22E-29  | postive |
| PHKG2          | TMEM44-AS  | 0.429055516 | 1.50E-25  | postive |
| TAZ            | TMEM44-AS  | 0.566426658 | 4.64E-47  | postive |
| HELLS          | AP001432.1 | 0.563726867 | 1.55E-46  | postive |
| ZNF419         | AP001432.1 | 0.46448562  | 3.38E-30  | postive |
| ZFP69B         | AP001432.1 | 0.456909289 | 3.70E-29  | postive |
| TUBE1          | AP001432.1 | 0.48958866  | 7.75E-34  | postive |
| ALOX12         | AP001432.1 | 0.553941755 | 1.13E-44  | postive |
| GABPB1         | AP001432.1 | 0.51733558  | 3.16E-38  | postive |
| ATG7           | AP001432.1 | 0.428465985 | 1.78E-25  | postive |
| MAPK8          | AP001432.1 | 0.408808184 | 3.95E-23  | postive |
| ATM            | AP001432.1 | 0.779360761 | 4.16E-111 | postive |
| FBXW7          | AP001432.1 | 0.544438642 | 6.36E-43  | postive |
| TUBE1          | LINC00622  | 0.413977391 | 9.88E-24  | postive |
| HELLS          | AL049840.2 | 0.483864415 | 5.57E-33  | postive |
| ZNF419         | AL049840.2 | 0.539249401 | 5.45E-42  | postive |
| KLHL24         | AL049840.2 | 0.46425992  | 3.63E-30  | postive |
| TUBE1          | AL049840.2 | 0.549993409 | 6.13E-44  | postive |
| SETD1B         | AL049840.2 | 0.406425535 | 7.43E-23  | postive |
| ALOX12         | AL049840.2 | 0.55911422  | 1.19E-45  | postive |
| IREB2          | AL049840.2 | 0.45647567  | 4.24E-29  | postive |
| GABPB1         | AL049840.2 | 0.609313918 | 4.36E-56  | postive |
| PIK3CA         | AL049840.2 | 0.442288865 | 3.19E-27  | postive |
| MAPK8          | AL049840.2 | 0.511735196 | 2.62E-37  | postive |
| LINC00472      | AL049840.2 | 0.789790122 | 4.45E-116 | postive |

|           |            |              |          |          |
|-----------|------------|--------------|----------|----------|
| LPIN1     | AL049840.2 | 0.406485755  | 7.32E-23 | postive  |
| ATM       | AL049840.2 | 0.705867961  | 1.85E-82 | postive  |
| FBXW7     | AL049840.2 | 0.547388095  | 1.85E-43 | postive  |
| TFAP2C    | AC002550.2 | 0.563257426  | 1.91E-46 | postive  |
| HBA1      | AC002550.2 | 0.509419889  | 6.22E-37 | postive  |
| DUOX1     | AC002550.2 | 0.434267655  | 3.36E-26 | postive  |
| ZNF419    | AP006621.4 | 0.462380168  | 6.61E-30 | postive  |
| VEGFA     | AP006621.4 | 0.466589464  | 1.72E-30 | postive  |
| TUBE1     | AP006621.4 | 0.522356819  | 4.59E-39 | postive  |
| SETD1B    | AP006621.4 | 0.444537299  | 1.63E-27 | postive  |
| ALOX12    | AP006621.4 | 0.638595339  | 4.34E-63 | postive  |
| TAZ       | AP006621.4 | 0.463186457  | 5.11E-30 | postive  |
| BECN1     | SNHG16     | 0.409845343  | 3.00E-23 | postive  |
| MTDH      | SNHG16     | 0.404046927  | 1.39E-22 | postive  |
| BACH1     | SNHG16     | 0.407808767  | 5.16E-23 | postive  |
| HELLS     | EPS15-AS1  | 0.430631273  | 9.58E-26 | postive  |
| TUBE1     | EPS15-AS1  | 0.444217323  | 1.80E-27 | postive  |
| ALOX12    | EPS15-AS1  | 0.526398813  | 9.47E-40 | postive  |
| GABPB1    | EPS15-AS1  | 0.424084401  | 6.11E-25 | postive  |
| LINC00472 | EPS15-AS1  | 0.437341153  | 1.37E-26 | postive  |
| ATM       | EPS15-AS1  | 0.571783254  | 4.08E-48 | postive  |
| FBXW7     | EPS15-AS1  | 0.408988765  | 3.77E-23 | postive  |
| LURAP1L   | NR2F1-AS1  | 0.44926603   | 3.91E-28 | postive  |
| IL33      | NR2F1-AS1  | 0.426379388  | 3.21E-25 | postive  |
| GABPB1    | NR2F1-AS1  | 0.452928727  | 1.27E-28 | postive  |
| ZEB1      | NR2F1-AS1  | 0.565580681  | 6.78E-47 | postive  |
| EPAS1     | NR2F1-AS1  | 0.534856521  | 3.26E-41 | postive  |
| ALOX12    | SLC6A1-AS1 | 0.470182853  | 5.35E-31 | postive  |
| GABPB1    | SLC6A1-AS1 | 0.466427045  | 1.81E-30 | postive  |
| ZEB1      | SLC6A1-AS1 | 0.521384569  | 6.68E-39 | postive  |
| MAPK8     | SLC6A1-AS1 | 0.424930037  | 4.82E-25 | postive  |
| LINC00472 | SLC6A1-AS1 | 0.404239737  | 1.32E-22 | postive  |
| ATM       | SLC6A1-AS1 | 0.594906576  | 6.67E-53 | postive  |
| FBXW7     | SLC6A1-AS1 | 0.440981106  | 4.71E-27 | postive  |
| ACSL3     | AL606834.1 | 0.43433933   | 3.29E-26 | postive  |
| DDIT3     | AL606834.1 | 0.406380381  | 7.52E-23 | postive  |
| KLHL24    | AL606834.1 | 0.550707043  | 4.52E-44 | postive  |
| KRAS      | AL606834.1 | 0.429507814  | 1.32E-25 | postive  |
| GABARAPL1 | AL606834.1 | 0.594295835  | 9.02E-53 | postive  |
| LINC00472 | AL606834.1 | 0.613672808  | 4.40E-57 | postive  |
| LPIN1     | AL606834.1 | 0.597508282  | 1.82E-53 | postive  |
| TUBE1     | AC093297.2 | 0.445988903  | 1.05E-27 | postive  |
| ALOX12    | AC093297.2 | 0.41853088   | 2.85E-24 | postive  |
| ATM       | AC093297.2 | 0.431868993  | 6.72E-26 | postive  |
| HELLS     | AC026368.1 | 0.484564903  | 4.38E-33 | postive  |
| TUBE1     | AC026368.1 | 0.401878112  | 2.45E-22 | postive  |
| GABPB1    | AC026368.1 | 0.531910153  | 1.07E-40 | postive  |
| LINC00472 | AC026368.1 | 0.695257451  | 4.78E-79 | postive  |
| ATM       | AC026368.1 | 0.614152037  | 3.41E-57 | postive  |
| FBXW7     | AC026368.1 | 0.449323368  | 3.84E-28 | postive  |
| HSPB1     | MINCR      | 0.401090043  | 3.00E-22 | postive  |
| HSF1      | MINCR      | 0.569036389  | 1.43E-47 | postive  |
| HRAS      | MINCR      | 0.423690184  | 6.83E-25 | postive  |
| NCOA4     | MINCR      | -0.442483701 | 3.01E-27 | negative |
| PHKG2     | MINCR      | 0.651357067  | 2.19E-66 | postive  |
| MAPK1     | MINCR      | -0.417345205 | 3.95E-24 | negative |
| TAZ       | MINCR      | 0.607496443  | 1.12E-55 | postive  |
| ALOX12    | TMCC1-AS1  | 0.411107769  | 2.14E-23 | postive  |

|           |            |             |          |         |
|-----------|------------|-------------|----------|---------|
| HELLS     | AC084871.1 | 0.517890056 | 2.56E-38 | postive |
| KLHL24    | AC084871.1 | 0.400205979 | 3.77E-22 | postive |
| TUBE1     | AC084871.1 | 0.403214709 | 1.73E-22 | postive |
| IREB2     | AC084871.1 | 0.407263849 | 5.96E-23 | postive |
| GABPB1    | AC084871.1 | 0.529537188 | 2.74E-40 | postive |
| ATG7      | AC084871.1 | 0.470074699 | 5.55E-31 | postive |
| LINC00472 | AC084871.1 | 0.72041048  | 2.17E-87 | postive |
| ATM       | AC084871.1 | 0.714853645 | 1.81E-85 | postive |
| FBXW7     | AC084871.1 | 0.468185609 | 1.03E-30 | postive |
| ZNF419    | AL160006.1 | 0.481295052 | 1.33E-32 | postive |
| VEGFA     | AL160006.1 | 0.573317568 | 2.02E-48 | postive |
| TUBE1     | AL160006.1 | 0.441494226 | 4.04E-27 | postive |
| SETD1B    | AL160006.1 | 0.593880789 | 1.11E-52 | postive |
| ALOX12    | AL160006.1 | 0.44034853  | 5.68E-27 | postive |
| YY1AP1    | AL160006.1 | 0.420736075 | 1.55E-24 | postive |
| ALOX12    | AC016396.1 | 0.406539498 | 7.21E-23 | postive |
| ALOX12    | AC118754.1 | 0.496491379 | 6.83E-35 | postive |
| MIOX      | AC118754.1 | 0.412958004 | 1.30E-23 | postive |
| TAZ       | AC118754.1 | 0.458858636 | 2.01E-29 | postive |
| ALOX12    | LINC01550  | 0.429227513 | 1.43E-25 | postive |
| ALOX5     | AL731567.1 | 0.536193576 | 1.90E-41 | postive |
| ALOX12    | AL731567.1 | 0.400799523 | 3.23E-22 | postive |
| PHKG2     | AL731567.1 | 0.541399712 | 2.25E-42 | postive |
| TAZ       | AL731567.1 | 0.451646013 | 1.89E-28 | postive |
| SLC3A2    | AC148477.4 | 0.494862737 | 1.22E-34 | postive |
| FH        | AC148477.4 | 0.440457703 | 5.50E-27 | postive |
| ISCU      | AC148477.4 | 0.631761238 | 2.18E-61 | postive |
| DDIT3     | AC148477.4 | 0.502423438 | 8.11E-36 | postive |
| SLC2A12   | AC148477.4 | 0.438068338 | 1.11E-26 | postive |
| CS        | AC148477.4 | 0.502753325 | 7.19E-36 | postive |
| GOT1      | AC148477.4 | 0.42826901  | 1.88E-25 | postive |
| ATG4D     | AC148477.4 | 0.595131678 | 5.96E-53 | postive |
| MAP1LC3A  | AC148477.4 | 0.458844379 | 2.02E-29 | postive |
| GABARAPL1 | AC148477.4 | 0.740768229 | 7.60E-95 | postive |
| WIPI2     | AC148477.4 | 0.445043966 | 1.40E-27 | postive |
| LPIN1     | AC148477.4 | 0.62200283  | 4.97E-59 | postive |
| PLIN2     | DOCK8-AS1  | 0.478691107 | 3.21E-32 | postive |
| PCK2      | DOCK8-AS1  | 0.416945208 | 4.41E-24 | postive |
| PEBP1     | DOCK8-AS1  | 0.403204272 | 1.73E-22 | postive |
| MIOX      | DOCK8-AS1  | 0.459239153 | 1.78E-29 | postive |
| HELLS     | AC068790.5 | 0.545260953 | 4.51E-43 | postive |
| ZNF419    | AC068790.5 | 0.436527924 | 1.74E-26 | postive |
| TUBE1     | AC068790.5 | 0.520547326 | 9.23E-39 | postive |
| ALOX12    | AC068790.5 | 0.512441079 | 2.01E-37 | postive |
| GABPB1    | AC068790.5 | 0.562392932 | 2.81E-46 | postive |
| LINC00472 | AC068790.5 | 0.647505393 | 2.25E-65 | postive |
| ATM       | AC068790.5 | 0.708078328 | 3.45E-83 | postive |
| FBXW7     | AC068790.5 | 0.553333509 | 1.47E-44 | postive |
| ZNF419    | AL121655.1 | 0.473611889 | 1.74E-31 | postive |
| TUBE1     | AL121655.1 | 0.488843686 | 1.00E-33 | postive |
| GABPB1    | AL121655.1 | 0.46297038  | 5.48E-30 | postive |
| LINC00472 | AL121655.1 | 0.603299158 | 9.74E-55 | postive |
| TAZ       | AL121655.1 | 0.42733476  | 2.45E-25 | postive |
| PROM2     | AL008726.1 | 0.438603447 | 9.49E-27 | postive |
| TFAP2C    | AL008726.1 | 0.44319175  | 2.44E-27 | postive |
| HELLS     | AC090739.1 | 0.511441317 | 2.93E-37 | postive |
| ZNF419    | AC090739.1 | 0.405145481 | 1.04E-22 | postive |
| KLHL24    | AC090739.1 | 0.466255685 | 1.91E-30 | postive |

|           |            |              |           |          |
|-----------|------------|--------------|-----------|----------|
| TUBE1     | AC090739.1 | 0.466162723  | 1.97E-30  | postive  |
| ALOX12    | AC090739.1 | 0.435394734  | 2.43E-26  | postive  |
| IREB2     | AC090739.1 | 0.421169904  | 1.38E-24  | postive  |
| GABPB1    | AC090739.1 | 0.585946463  | 5.30E-51  | postive  |
| PIK3CA    | AC090739.1 | 0.423662886  | 6.88E-25  | postive  |
| MAPK8     | AC090739.1 | 0.442742371  | 2.79E-27  | postive  |
| LINC00472 | AC090739.1 | 0.87796465   | 6.30E-174 | postive  |
| ATM       | AC090739.1 | 0.650849473  | 2.99E-66  | postive  |
| FBXW7     | AC090739.1 | 0.471371132  | 3.63E-31  | postive  |
| SLC40A1   | BACE1-AS   | -0.406198718 | 7.89E-23  | negative |
| LAMP2     | BACE1-AS   | -0.436716575 | 1.65E-26  | negative |
| ZNF419    | BACE1-AS   | 0.418771696  | 2.67E-24  | postive  |
| DRD4      | BACE1-AS   | 0.431153193  | 8.25E-26  | postive  |
| ALOX12    | BACE1-AS   | 0.431671988  | 7.11E-26  | postive  |
| NRAS      | BACE1-AS   | -0.439390326 | 7.53E-27  | negative |
| NCOA4     | BACE1-AS   | -0.53988812  | 4.19E-42  | negative |
| PHKG2     | BACE1-AS   | 0.511275627  | 3.11E-37  | postive  |
| BECN1     | BACE1-AS   | -0.427065981 | 2.64E-25  | negative |
| ANO6      | BACE1-AS   | -0.430454437 | 1.01E-25  | negative |
| TAZ       | BACE1-AS   | 0.625527753  | 7.15E-60  | postive  |
| MTDH      | BACE1-AS   | -0.49452176  | 1.37E-34  | negative |
| HRAS      | ODC1-DT    | 0.423729932  | 6.75E-25  | postive  |
| PHKG2     | ODC1-DT    | 0.484790636  | 4.06E-33  | postive  |
| TAZ       | ODC1-DT    | 0.453806421  | 9.71E-29  | postive  |
| ZNF419    | DICER1-AS1 | 0.507715355  | 1.17E-36  | postive  |
| TUBE1     | DICER1-AS1 | 0.460857755  | 1.07E-29  | postive  |
| DRD4      | DICER1-AS1 | 0.402127825  | 2.29E-22  | postive  |
| ALOX12    | DICER1-AS1 | 0.580757772  | 6.29E-50  | postive  |
| PHKG2     | DICER1-AS1 | 0.517203436  | 3.33E-38  | postive  |
| TAZ       | DICER1-AS1 | 0.621679948  | 5.93E-59  | postive  |
| ZNF419    | AL139349.1 | 0.410330095  | 2.64E-23  | postive  |
| PHKG2     | AL139349.1 | 0.424461307  | 5.50E-25  | postive  |
| ULK1      | AL139349.1 | 0.461903369  | 7.69E-30  | postive  |
| TAZ       | AL139349.1 | 0.431892281  | 6.68E-26  | postive  |
| GCLC      | CYTOR      | -0.437982895 | 1.14E-26  | negative |
| SLC2A6    | CYTOR      | 0.510066995  | 4.89E-37  | postive  |
| IREB2     | CYTOR      | -0.41164856  | 1.85E-23  | negative |
| LPCAT3    | CYTOR      | -0.406436923 | 7.41E-23  | negative |
| HRAS      | CYTOR      | 0.507288529  | 1.37E-36  | postive  |
| NCOA4     | CYTOR      | -0.437966639 | 1.14E-26  | negative |
| MAPK1     | CYTOR      | -0.407957132 | 4.96E-23  | negative |
| PRKAA2    | CYTOR      | -0.423361406 | 7.49E-25  | negative |
| EGLN2     | CYTOR      | 0.499993871  | 1.95E-35  | postive  |
| HELLS     | AP000907.2 | 0.463973737  | 3.98E-30  | postive  |
| ZNF419    | AP000907.2 | 0.433381706  | 4.35E-26  | postive  |
| TUBE1     | AP000907.2 | 0.471210932  | 3.83E-31  | postive  |
| ALOX12    | AP000907.2 | 0.663954075  | 8.47E-70  | postive  |
| GABPB1    | AP000907.2 | 0.435806959  | 2.15E-26  | postive  |
| ATM       | AP000907.2 | 0.582103538  | 3.32E-50  | postive  |
| FBXW7     | AP000907.2 | 0.418996964  | 2.51E-24  | postive  |
| TUBE1     | AL356361.2 | 0.414348721  | 8.94E-24  | postive  |
| ATM       | AL356361.2 | 0.527173509  | 6.99E-40  | postive  |
| FANCD2    | LINC02528  | 0.415181595  | 7.13E-24  | postive  |
| GCH1      | LINC02528  | 0.629047394  | 1.01E-60  | postive  |
| NCF2      | LINC02528  | 0.41526651   | 6.96E-24  | postive  |
| CYBB      | LINC02528  | 0.629095492  | 9.80E-61  | postive  |
| IFNG      | LINC02528  | 0.730434923  | 5.63E-91  | postive  |
| TLR4      | LINC02528  | 0.402751407  | 1.95E-22  | postive  |

|           |                        |             |           |         |
|-----------|------------------------|-------------|-----------|---------|
| TUBE1     | AC068051.1             | 0.460988039 | 1.03E-29  | postive |
| ALOX12    | AC068051.1             | 0.447352596 | 6.99E-28  | postive |
| MAPK8     | AC068051.1             | 0.493304593 | 2.11E-34  | postive |
| PRKAA2    | AC068051.1             | 0.468821194 | 8.34E-31  | postive |
| ATM       | AC068051.1             | 0.611078267 | 1.73E-56  | postive |
| HELLS     | AC005740.3             | 0.454129424 | 8.79E-29  | postive |
| KLHL24    | AC005740.3             | 0.509300473 | 6.50E-37  | postive |
| TUBE1     | AC005740.3             | 0.426472948 | 3.12E-25  | postive |
| IREB2     | AC005740.3             | 0.405101994 | 1.05E-22  | postive |
| GABPB1    | AC005740.3             | 0.557413875 | 2.51E-45  | postive |
| PIK3CA    | AC005740.3             | 0.432188708 | 6.13E-26  | postive |
| MAPK8     | AC005740.3             | 0.401836068 | 2.47E-22  | postive |
| LINC00472 | AC005740.3             | 0.885633566 | 5.04E-181 | postive |
| ATM       | AC005740.3             | 0.658345778 | 2.94E-68  | postive |
| FBXW7     | AC005740.3             | 0.469666056 | 6.34E-31  | postive |
| FANCD2    | AP001527.2             | 0.400405839 | 3.58E-22  | postive |
| PHKG2     | AP001527.2             | 0.431962438 | 6.54E-26  | postive |
| PLIN2     | LINC01843              | 0.413539881 | 1.11E-23  | postive |
| BNIP3     | LINC01843              | 0.40540065  | 9.74E-23  | postive |
| ISCU      | AC023794.2             | 0.498978092 | 2.81E-35  | postive |
| DDIT3     | AC023794.2             | 0.448663319 | 4.70E-28  | postive |
| ATG4D     | AC023794.2             | 0.474327155 | 1.37E-31  | postive |
| MAP1LC3A  | AC023794.2             | 0.531255589 | 1.38E-40  | postive |
| GABARAPL2 | AC023794.2             | 0.401433709 | 2.74E-22  | postive |
| GABARAPL1 | AC023794.2             | 0.450928229 | 2.35E-28  | postive |
| LPIN1     | AC023794.2             | 0.409971847 | 2.90E-23  | postive |
| HELLS     | ZKSCAN2-D <sup>-</sup> | 0.41023538  | 2.70E-23  | postive |
| BRD4      | ZKSCAN2-D <sup>-</sup> | 0.404483197 | 1.24E-22  | postive |
| ZNF419    | ZKSCAN2-D <sup>-</sup> | 0.602838991 | 1.23E-54  | postive |
| VEGFA     | ZKSCAN2-D <sup>-</sup> | 0.408741536 | 4.03E-23  | postive |
| TUBE1     | ZKSCAN2-D <sup>-</sup> | 0.619223952 | 2.25E-58  | postive |
| SETD1B    | ZKSCAN2-D <sup>-</sup> | 0.446312944 | 9.57E-28  | postive |
| DRD4      | ZKSCAN2-D <sup>-</sup> | 0.417340141 | 3.96E-24  | postive |
| ALOX12    | ZKSCAN2-D <sup>-</sup> | 0.678295884 | 6.82E-74  | postive |
| GABPB1    | ZKSCAN2-D <sup>-</sup> | 0.467171853 | 1.42E-30  | postive |
| PHKG2     | ZKSCAN2-D <sup>-</sup> | 0.549311309 | 8.19E-44  | postive |
| LINC00472 | ZKSCAN2-D <sup>-</sup> | 0.446637825 | 8.68E-28  | postive |
| ATM       | ZKSCAN2-D <sup>-</sup> | 0.484954827 | 3.84E-33  | postive |
| TAZ       | ZKSCAN2-D <sup>-</sup> | 0.650436461 | 3.84E-66  | postive |
| FBXW7     | ZKSCAN2-D <sup>-</sup> | 0.433696732 | 3.97E-26  | postive |
| HELLS     | DGUOK-AS1              | 0.570150926 | 8.60E-48  | postive |
| ZNF419    | DGUOK-AS1              | 0.518013613 | 2.44E-38  | postive |
| TUBE1     | DGUOK-AS1              | 0.576866177 | 3.90E-49  | postive |
| ALOX12    | DGUOK-AS1              | 0.543724896 | 8.57E-43  | postive |
| GABPB1    | DGUOK-AS1              | 0.56363707  | 1.62E-46  | postive |
| LINC00472 | DGUOK-AS1              | 0.519518795 | 1.37E-38  | postive |
| ATM       | DGUOK-AS1              | 0.608009668 | 8.60E-56  | postive |
| TAZ       | DGUOK-AS1              | 0.433715245 | 3.95E-26  | postive |
| FBXW7     | DGUOK-AS1              | 0.505249867 | 2.89E-36  | postive |
| HELLS     | AC125437.1             | 0.493366908 | 2.07E-34  | postive |
| CHAC1     | AC139100.2             | 0.49338681  | 2.05E-34  | postive |
| PHKG2     | AC139100.2             | 0.507247543 | 1.39E-36  | postive |
| ATG4D     | AC139100.2             | 0.41726177  | 4.04E-24  | postive |
| MAP1LC3A  | AC139100.2             | 0.413220651 | 1.21E-23  | postive |
| TAZ       | AC139100.2             | 0.516969954 | 3.63E-38  | postive |
| HELLS     | AC069120.1             | 0.419439889 | 2.22E-24  | postive |
| HELLS     | AC090948.1             | 0.432062377 | 6.36E-26  | postive |
| KLHL24    | AC090948.1             | 0.48336375  | 6.61E-33  | postive |

|           |            |             |           |          |
|-----------|------------|-------------|-----------|----------|
| GABPB1    | AC090948.1 | 0.549039936 | 9.19E-44  | postive  |
| PIK3CA    | AC090948.1 | 0.419539727 | 2.16E-24  | postive  |
| ATG7      | AC090948.1 | 0.401807739 | 2.49E-22  | postive  |
| LINC00472 | AC090948.1 | 0.892209747 | 1.58E-187 | postive  |
| ATM       | AC090948.1 | 0.604662791 | 4.84E-55  | postive  |
| FBXW7     | AC090948.1 | 0.426454363 | 3.14E-25  | postive  |
| ZNF419    | AP001010.1 | 0.407909545 | 5.02E-23  | postive  |
| ALOX12    | AP001010.1 | 0.490900804 | 4.91E-34  | postive  |
| TAZ       | AP001010.1 | 0.454292114 | 8.36E-29  | postive  |
| HSF1      | FOXD2-AS1  | 0.432060843 | 6.36E-26  | postive  |
| ATF4      | FOXD2-AS1  | 0.407893663 | 5.04E-23  | postive  |
| PML       | FOXD2-AS1  | 0.417353929 | 3.94E-24  | postive  |
| BRD4      | FOXD2-AS1  | 0.462641113 | 6.08E-30  | postive  |
| NCOA4     | FOXD2-AS1  | -0.4404328  | 5.54E-27  | negative |
| TAZ       | FOXD2-AS1  | 0.51216621  | 2.23E-37  | postive  |
| TFAP2C    | AC010336.2 | 0.443674205 | 2.11E-27  | postive  |
| HBA1      | AC010336.2 | 0.408425236 | 4.38E-23  | postive  |
| ATM       | AC246817.1 | 0.488922053 | 9.77E-34  | postive  |
| VDAC2     | NRSN2-AS1  | 0.41758528  | 3.70E-24  | postive  |
| SRXN1     | NRSN2-AS1  | 0.423849552 | 6.53E-25  | postive  |
| IREB2     | AP001528.1 | 0.458285584 | 2.41E-29  | postive  |
| ZEB1      | AP001528.1 | 0.41470058  | 8.12E-24  | postive  |
| MAPK8     | AP001528.1 | 0.456584057 | 4.10E-29  | postive  |
| PRKAA2    | AP001528.1 | 0.413981779 | 9.87E-24  | postive  |
| PRKAA1    | AP001528.1 | 0.405446201 | 9.62E-23  | postive  |
| ATM       | AP001528.1 | 0.48214707  | 9.99E-33  | postive  |
| SIRT1     | AP001528.1 | 0.429017766 | 1.52E-25  | postive  |
| HELLS     | AC090198.1 | 0.449754081 | 3.37E-28  | postive  |
| ZNF419    | AC090198.1 | 0.459918838 | 1.44E-29  | postive  |
| KLHL24    | AC090198.1 | 0.422722262 | 8.95E-25  | postive  |
| TUBE1     | AC090198.1 | 0.524411016 | 2.06E-39  | postive  |
| SETD1B    | AC090198.1 | 0.411943841 | 1.71E-23  | postive  |
| ALOX12    | AC090198.1 | 0.498590518 | 3.23E-35  | postive  |
| IREB2     | AC090198.1 | 0.521423456 | 6.58E-39  | postive  |
| SP1       | AC090198.1 | 0.493177808 | 2.21E-34  | postive  |
| GABPB1    | AC090198.1 | 0.564496127 | 1.10E-46  | postive  |
| PIK3CA    | AC090198.1 | 0.474178937 | 1.44E-31  | postive  |
| KRAS      | AC090198.1 | 0.428099084 | 1.97E-25  | postive  |
| ULK2      | AC090198.1 | 0.431282606 | 7.95E-26  | postive  |
| ZEB1      | AC090198.1 | 0.42342477  | 7.35E-25  | postive  |
| MAPK8     | AC090198.1 | 0.571823612 | 4.01E-48  | postive  |
| LINC00472 | AC090198.1 | 0.551565066 | 3.14E-44  | postive  |
| PRKAA2    | AC090198.1 | 0.463948161 | 4.01E-30  | postive  |
| PRKAA1    | AC090198.1 | 0.465541797 | 2.41E-30  | postive  |
| ATM       | AC090198.1 | 0.684382076 | 1.06E-75  | postive  |
| FBXW7     | AC090198.1 | 0.517328763 | 3.17E-38  | postive  |
| TFAP2C    | AC013553.3 | 0.543082424 | 1.12E-42  | postive  |
| HBA1      | AC013553.3 | 0.531028037 | 1.52E-40  | postive  |
| ALOX12    | MIS18A-AS1 | 0.41177622  | 1.79E-23  | postive  |
| TFAP2C    | MIS18A-AS1 | 0.550481522 | 4.98E-44  | postive  |
| HBA1      | MIS18A-AS1 | 0.478417306 | 3.52E-32  | postive  |
| DUOX1     | MIS18A-AS1 | 0.447556652 | 6.57E-28  | postive  |
| HELLS     | AL020997.3 | 0.484027651 | 5.27E-33  | postive  |
| TUBE1     | AL020997.3 | 0.526993578 | 7.50E-40  | postive  |
| ALOX12    | AL020997.3 | 0.526439507 | 9.32E-40  | postive  |
| GABPB1    | AL020997.3 | 0.49055593  | 5.53E-34  | postive  |
| LINC00472 | AL020997.3 | 0.46672369  | 1.64E-30  | postive  |
| ATM       | AL020997.3 | 0.675517953 | 4.41E-73  | postive  |



|           |             |             |           |         |
|-----------|-------------|-------------|-----------|---------|
| FBXW7     | AL020997.3  | 0.461805509 | 7.93E-30  | postive |
| ZNF419    | AL590617.2  | 0.419889773 | 1.96E-24  | postive |
| SLC2A6    | AL590617.2  | 0.401371817 | 2.79E-22  | postive |
| HRAS      | AL590617.2  | 0.402440378 | 2.11E-22  | postive |
| PHKG2     | AL590617.2  | 0.408825617 | 3.94E-23  | postive |
| EGLN2     | AL590617.2  | 0.505209078 | 2.94E-36  | postive |
| TAZ       | AL590617.2  | 0.520932587 | 7.96E-39  | postive |
| ALOX12    | AC116447.1  | 0.423792592 | 6.64E-25  | postive |
| HELLS     | C21orf62-AS | 0.437821675 | 1.19E-26  | postive |
| TUBE1     | C21orf62-AS | 0.477741199 | 4.41E-32  | postive |
| ALOX12    | C21orf62-AS | 0.500308424 | 1.74E-35  | postive |
| MAPK8     | C21orf62-AS | 0.417441786 | 3.85E-24  | postive |
| ATM       | C21orf62-AS | 0.596541972 | 2.95E-53  | postive |
| TFAP2C    | USP2-AS1    | 0.496501426 | 6.81E-35  | postive |
| HBA1      | USP2-AS1    | 0.425685183 | 3.90E-25  | postive |
| FANCD2    | KDM4A-AS1   | 0.488945415 | 9.69E-34  | postive |
| HELLS     | KDM4A-AS1   | 0.612219919 | 9.49E-57  | postive |
| ZNF419    | KDM4A-AS1   | 0.553271549 | 1.51E-44  | postive |
| TUBE1     | KDM4A-AS1   | 0.558148406 | 1.82E-45  | postive |
| ALOX12    | KDM4A-AS1   | 0.659750517 | 1.22E-68  | postive |
| GABPB1    | KDM4A-AS1   | 0.476346647 | 7.02E-32  | postive |
| ATM       | KDM4A-AS1   | 0.510486612 | 4.18E-37  | postive |
| TAZ       | KDM4A-AS1   | 0.4682025   | 1.02E-30  | postive |
| FBXW7     | KDM4A-AS1   | 0.495609777 | 9.35E-35  | postive |
| BRD4      | COL4A2-AS1  | 0.433944738 | 3.69E-26  | postive |
| ZNF419    | COL4A2-AS1  | 0.47592128  | 8.09E-32  | postive |
| VEGFA     | COL4A2-AS1  | 0.486551043 | 2.22E-33  | postive |
| TUBE1     | COL4A2-AS1  | 0.459937272 | 1.43E-29  | postive |
| SETD1B    | COL4A2-AS1  | 0.436073738 | 1.99E-26  | postive |
| ALOX12    | COL4A2-AS1  | 0.524934448 | 1.68E-39  | postive |
| GABPB1    | COL4A2-AS1  | 0.423229237 | 7.77E-25  | postive |
| ZEB1      | COL4A2-AS1  | 0.453505979 | 1.07E-28  | postive |
| FBXW7     | COL4A2-AS1  | 0.453721392 | 9.97E-29  | postive |
| KLHL24    | MECOM-AS1   | 0.600675905 | 3.70E-54  | postive |
| IREB2     | MECOM-AS1   | 0.403743611 | 1.50E-22  | postive |
| GABPB1    | MECOM-AS1   | 0.408673948 | 4.10E-23  | postive |
| PIK3CA    | MECOM-AS1   | 0.488717529 | 1.05E-33  | postive |
| KRAS      | MECOM-AS1   | 0.426625582 | 2.99E-25  | postive |
| LINC00472 | MECOM-AS1   | 0.944940985 | 1.11E-262 | postive |
| HELLS     | SEMA6A-AS1  | 0.527577251 | 5.96E-40  | postive |
| TUBE1     | SEMA6A-AS1  | 0.576714247 | 4.19E-49  | postive |
| ALOX12    | SEMA6A-AS1  | 0.558951279 | 1.28E-45  | postive |
| GABPB1    | SEMA6A-AS1  | 0.534416027 | 3.89E-41  | postive |
| MAPK8     | SEMA6A-AS1  | 0.450401125 | 2.77E-28  | postive |
| LINC00472 | SEMA6A-AS1  | 0.559370523 | 1.07E-45  | postive |
| ATM       | SEMA6A-AS1  | 0.742482294 | 1.66E-95  | postive |
| FBXW7     | SEMA6A-AS1  | 0.467362157 | 1.34E-30  | postive |
| ATP6V1G2  | AC023906.5  | 0.404229354 | 1.32E-22  | postive |
| ACO1      | AC023906.5  | 0.631763726 | 2.18E-61  | postive |
| HSPB1     | AL035461.2  | 0.407469334 | 5.64E-23  | postive |
| FANCD2    | AL035461.2  | 0.431068114 | 8.46E-26  | postive |
| TFAP2C    | AL035461.2  | 0.495351912 | 1.02E-34  | postive |
| HBA1      | AL035461.2  | 0.542550991 | 1.40E-42  | postive |
| PHKG2     | AL035461.2  | 0.417418878 | 3.87E-24  | postive |
| EGLN2     | AL035461.2  | 0.409385673 | 3.39E-23  | postive |
| FANCD2    | AC131009.1  | 0.438542935 | 9.66E-27  | postive |
| TFAP2C    | AC131009.1  | 0.552969319 | 1.72E-44  | postive |
| TFAP2C    | SUCLA2-AS1  | 0.40608991  | 8.12E-23  | postive |

|           |            |              |          |          |
|-----------|------------|--------------|----------|----------|
| HBA1      | SUCLA2-AS1 | 0.644822853  | 1.12E-64 | postive  |
| HRAS      | SUCLA2-AS1 | 0.455723435  | 5.36E-29 | postive  |
| EGLN2     | SUCLA2-AS1 | 0.547216898  | 1.98E-43 | postive  |
| ZNF419    | AL731571.1 | 0.509505256  | 6.02E-37 | postive  |
| VEGFA     | AL731571.1 | 0.589686742  | 8.68E-52 | postive  |
| TUBE1     | AL731571.1 | 0.586924979  | 3.31E-51 | postive  |
| SETD1B    | AL731571.1 | 0.460617778  | 1.16E-29 | postive  |
| ALOX12    | AL731571.1 | 0.693687219  | 1.49E-78 | postive  |
| GABPB1    | AL731571.1 | 0.425034892  | 4.68E-25 | postive  |
| ATM       | AL731571.1 | 0.50244571   | 8.04E-36 | postive  |
| YY1AP1    | AL731571.1 | 0.423147298  | 7.95E-25 | postive  |
| FBXW7     | AL731571.1 | 0.447848492  | 6.02E-28 | postive  |
| HELLS     | AGAP1-IT1  | 0.493930684  | 1.69E-34 | postive  |
| ALOX12    | AGAP1-IT1  | 0.404660586  | 1.18E-22 | postive  |
| LINC00472 | AGAP1-IT1  | 0.41343759   | 1.14E-23 | postive  |
| ATM       | AGAP1-IT1  | 0.541600487  | 2.07E-42 | postive  |
| HELLS     | AL603756.1 | 0.524064968  | 2.36E-39 | postive  |
| ALOX12    | AL603756.1 | 0.445030499  | 1.41E-27 | postive  |
| GABPB1    | AL603756.1 | 0.466022511  | 2.06E-30 | postive  |
| ATG7      | AL603756.1 | 0.442208541  | 3.27E-27 | postive  |
| LINC00472 | AL603756.1 | 0.479760416  | 2.24E-32 | postive  |
| ATM       | AL603756.1 | 0.685281298  | 5.67E-76 | postive  |
| FBXW7     | AL603756.1 | 0.459243629  | 1.78E-29 | postive  |
| TFAP2C    | AC067817.2 | 0.581861744  | 3.73E-50 | postive  |
| HBA1      | AC067817.2 | 0.541185699  | 2.46E-42 | postive  |
| DUOX1     | AC067817.2 | 0.409547375  | 3.25E-23 | postive  |
| GPX4      | AC005034.5 | -0.409226308 | 3.54E-23 | negative |
| RB1       | AC005034.5 | 0.576896191  | 3.85E-49 | postive  |
| OTUB1     | AC005034.5 | -0.498644868 | 3.17E-35 | negative |
| OXSR1     | AC005034.5 | 0.433932582  | 3.71E-26 | postive  |
| KLHL24    | AC005034.5 | 0.495174262  | 1.09E-34 | postive  |
| MAP3K5    | AC005034.5 | 0.476816926  | 6.00E-32 | postive  |
| MAPK14    | AC005034.5 | 0.448195749  | 5.41E-28 | postive  |
| IREB2     | AC005034.5 | 0.66494151   | 4.50E-70 | postive  |
| SP1       | AC005034.5 | 0.527058662  | 7.31E-40 | postive  |
| GABPB1    | AC005034.5 | 0.469422115  | 6.86E-31 | postive  |
| PIK3CA    | AC005034.5 | 0.642380667  | 4.74E-64 | postive  |
| NRAS      | AC005034.5 | 0.456016852  | 4.89E-29 | postive  |
| KRAS      | AC005034.5 | 0.608216701  | 7.72E-56 | postive  |
| SLC38A1   | AC005034.5 | 0.418231856  | 3.10E-24 | postive  |
| MAPK1     | AC005034.5 | 0.49485508   | 1.22E-34 | postive  |
| ZEB1      | AC005034.5 | 0.447445881  | 6.80E-28 | postive  |
| MAPK8     | AC005034.5 | 0.601454139  | 2.49E-54 | postive  |
| MAPK9     | AC005034.5 | 0.525405059  | 1.40E-39 | postive  |
| LINC00472 | AC005034.5 | 0.587378859  | 2.66E-51 | postive  |
| PRKAA2    | AC005034.5 | 0.632855271  | 1.17E-61 | postive  |
| PRKAA1    | AC005034.5 | 0.631435354  | 2.63E-61 | postive  |
| TGFBR1    | AC005034.5 | 0.435852381  | 2.12E-26 | postive  |
| ANO6      | AC005034.5 | 0.406306203  | 7.67E-23 | postive  |
| TLR4      | AC005034.5 | 0.474408999  | 1.34E-31 | postive  |
| ATM       | AC005034.5 | 0.612193918  | 9.62E-57 | postive  |
| MTDH      | AC005034.5 | 0.415060632  | 7.37E-24 | postive  |
| SIRT1     | AC005034.5 | 0.527504685  | 6.13E-40 | postive  |
| BACH1     | AC005034.5 | 0.472285389  | 2.69E-31 | postive  |
| HELLS     | AC006504.5 | 0.455821842  | 5.20E-29 | postive  |
| LINC00472 | AC069234.5 | 0.483042122  | 7.37E-33 | postive  |
| ATM       | AC069234.5 | 0.420724906  | 1.56E-24 | postive  |
| ZNF419    | AC002059.1 | 0.453911096  | 9.40E-29 | postive  |

|           |            |              |           |          |
|-----------|------------|--------------|-----------|----------|
| ALOX12    | AC002059.1 | 0.50780678   | 1.13E-36  | postive  |
| TAZ       | AC002059.1 | 0.458442694  | 2.29E-29  | postive  |
| FANCD2    | AL163051.1 | 0.401237493  | 2.89E-22  | postive  |
| TFAP2C    | AL163051.1 | 0.582443231  | 2.83E-50  | postive  |
| HBA1      | AL163051.1 | 0.587988408  | 1.98E-51  | postive  |
| PHKG2     | HDAC4-AS1  | 0.525144555  | 1.55E-39  | postive  |
| TAZ       | HDAC4-AS1  | 0.566580712  | 4.33E-47  | postive  |
| PTGS2     | MIAT       | 0.559132635  | 1.18E-45  | postive  |
| IL6       | MIAT       | 0.638340583  | 5.03E-63  | postive  |
| SLC2A3    | MIAT       | 0.554169786  | 1.02E-44  | postive  |
| EGLN2     | Z97192.2   | 0.477902798  | 4.18E-32  | postive  |
| HELLS     | AC021078.1 | 0.487115843  | 1.83E-33  | postive  |
| ZNF419    | AC021078.1 | 0.51501606   | 7.63E-38  | postive  |
| TUBE1     | AC021078.1 | 0.635247398  | 2.99E-62  | postive  |
| ALOX12    | AC021078.1 | 0.570530445  | 7.24E-48  | postive  |
| GABPB1    | AC021078.1 | 0.556894821  | 3.15E-45  | postive  |
| MAPK8     | AC021078.1 | 0.424389404  | 5.61E-25  | postive  |
| LINC00472 | AC021078.1 | 0.634438528  | 4.76E-62  | postive  |
| ATM       | AC021078.1 | 0.661936267  | 3.06E-69  | postive  |
| FBXW7     | AC021078.1 | 0.542310242  | 1.54E-42  | postive  |
| PHKG2     | AC127070.1 | 0.439808819  | 6.66E-27  | postive  |
| HELLS     | AC012404.1 | 0.501306098  | 1.22E-35  | postive  |
| KLHL24    | AC012404.1 | 0.428872756  | 1.58E-25  | postive  |
| IREB2     | AC012404.1 | 0.411489037  | 1.93E-23  | postive  |
| GABPB1    | AC012404.1 | 0.547527486  | 1.74E-43  | postive  |
| PIK3CA    | AC012404.1 | 0.421735505  | 1.18E-24  | postive  |
| ATG7      | AC012404.1 | 0.438399176  | 1.01E-26  | postive  |
| MAPK8     | AC012404.1 | 0.405347047  | 9.88E-23  | postive  |
| LINC00472 | AC012404.1 | 0.813545017  | 1.55E-128 | postive  |
| ATM       | AC012404.1 | 0.681113809  | 1.00E-74  | postive  |
| FBXW7     | AC012404.1 | 0.431216824  | 8.10E-26  | postive  |
| TFAP2C    | AC124242.1 | 0.419664298  | 2.09E-24  | postive  |
| HBA1      | AC124242.1 | 0.42905758   | 1.50E-25  | postive  |
| TUBE1     | AL645940.1 | 0.412316622  | 1.55E-23  | postive  |
| PHKG2     | AL645940.1 | 0.617621139  | 5.34E-58  | postive  |
| TAZ       | AL645940.1 | 0.708304705  | 2.90E-83  | postive  |
| ZNF419    | OBSCN-AS1  | 0.46844446   | 9.43E-31  | postive  |
| TUBE1     | OBSCN-AS1  | 0.407207744  | 6.05E-23  | postive  |
| ALOX12    | OBSCN-AS1  | 0.530157447  | 2.14E-40  | postive  |
| TAZ       | OBSCN-AS1  | 0.448391322  | 5.10E-28  | postive  |
| TFAP2C    | AC010463.2 | 0.572006264  | 3.69E-48  | postive  |
| HBA1      | AC010463.2 | 0.519461105  | 1.40E-38  | postive  |
| FANCD2    | TENM3-AS1  | 0.415564012  | 6.42E-24  | postive  |
| ANGPTL7   | TENM3-AS1  | 0.460679704  | 1.13E-29  | postive  |
| BRD4      | AC005387.1 | 0.404846874  | 1.13E-22  | postive  |
| TUBE1     | AC005387.1 | 0.4070414    | 6.32E-23  | postive  |
| DRD4      | AC005387.1 | 0.408825723  | 3.94E-23  | postive  |
| ALOX12    | AC005387.1 | 0.412593218  | 1.44E-23  | postive  |
| NCOA4     | AC005387.1 | -0.460389988 | 1.24E-29  | negative |
| PHKG2     | AC005387.1 | 0.653781223  | 4.98E-67  | postive  |
| TAZ       | AC005387.1 | 0.767025192  | 1.44E-105 | postive  |
| ALOX12    | AL353803.2 | 0.431295517  | 7.92E-26  | postive  |
| AKR1C1    | AL391427.1 | 0.544405436  | 6.45E-43  | postive  |
| AKR1C2    | AL391427.1 | 0.517900643  | 2.55E-38  | postive  |
| NQO1      | AL391427.1 | 0.430303653  | 1.05E-25  | postive  |
| LINC00472 | AL391427.1 | 0.460837592  | 1.08E-29  | postive  |
| ZNF419    | LINC00899  | 0.445286905  | 1.30E-27  | postive  |
| ALOX12    | LINC00899  | 0.483787306  | 5.72E-33  | postive  |

|           |            |             |           |         |
|-----------|------------|-------------|-----------|---------|
| HELLS     | AC010834.3 | 0.517782168 | 2.67E-38  | postive |
| MTOR      | AC010834.3 | 0.419901504 | 1.96E-24  | postive |
| ZNF419    | AC010834.3 | 0.469263902 | 7.22E-31  | postive |
| KLHL24    | AC010834.3 | 0.560279722 | 7.15E-46  | postive |
| TUBE1     | AC010834.3 | 0.523778593 | 2.64E-39  | postive |
| MAP3K5    | AC010834.3 | 0.400085672 | 3.89E-22  | postive |
| ALOX12    | AC010834.3 | 0.5268752   | 7.86E-40  | postive |
| IREB2     | AC010834.3 | 0.571111181 | 5.55E-48  | postive |
| SP1       | AC010834.3 | 0.416814561 | 4.57E-24  | postive |
| GABPB1    | AC010834.3 | 0.611238282 | 1.59E-56  | postive |
| PIK3CA    | AC010834.3 | 0.538777073 | 6.61E-42  | postive |
| KRAS      | AC010834.3 | 0.406552303 | 7.19E-23  | postive |
| ATG7      | AC010834.3 | 0.42179162  | 1.16E-24  | postive |
| MAPK8     | AC010834.3 | 0.52206422  | 5.14E-39  | postive |
| LINC00472 | AC010834.3 | 0.766328059 | 2.89E-105 | postive |
| PRKAA2    | AC010834.3 | 0.455131907 | 6.44E-29  | postive |
| PRKAA1    | AC010834.3 | 0.437854114 | 1.18E-26  | postive |
| ATM       | AC010834.3 | 0.781314284 | 5.12E-112 | postive |
| FBXW7     | AC010834.3 | 0.513142384 | 1.55E-37  | postive |
| PML       | ITGB2-AS1  | 0.423212195 | 7.80E-25  | postive |
| PHKG2     | ITGB2-AS1  | 0.547993524 | 1.43E-43  | postive |
| TAZ       | ITGB2-AS1  | 0.544712528 | 5.68E-43  | postive |
| TFAP2C    | TMEM167B-I | 0.500993805 | 1.36E-35  | postive |
| HBA1      | TMEM167B-I | 0.492349493 | 2.95E-34  | postive |
| ALOX12B   | TMEM167B-I | 0.406047923 | 8.21E-23  | postive |
| LAMP2     | AC003092.1 | 0.513534061 | 1.33E-37  | postive |
| HELLS     | AC092338.1 | 0.552736166 | 1.90E-44  | postive |
| ALOX12    | AC092338.1 | 0.499721243 | 2.15E-35  | postive |
| TFAP2C    | AC092338.1 | 0.403018369 | 1.82E-22  | postive |
| GABPB1    | AC092338.1 | 0.448426651 | 5.05E-28  | postive |
| DUOX1     | AC092338.1 | 0.428290802 | 1.87E-25  | postive |
| LINC00472 | AC092338.1 | 0.504664143 | 3.59E-36  | postive |
| ATM       | AC092338.1 | 0.511290711 | 3.10E-37  | postive |
| FBXW7     | AC092338.1 | 0.417686379 | 3.60E-24  | postive |
| VEGFA     | AC105020.1 | 0.440860655 | 4.88E-27  | postive |
| TUBE1     | AC105020.1 | 0.41405356  | 9.68E-24  | postive |
| ALOX12    | AC105020.1 | 0.494066454 | 1.61E-34  | postive |
| TAZ       | AC105020.1 | 0.472359181 | 2.63E-31  | postive |
| HELLS     | AC073487.1 | 0.534353765 | 3.99E-41  | postive |
| ZNF419    | AC073487.1 | 0.506121796 | 2.10E-36  | postive |
| TUBE1     | AC073487.1 | 0.597180622 | 2.15E-53  | postive |
| ALOX12    | AC073487.1 | 0.598650425 | 1.03E-53  | postive |
| GABPB1    | AC073487.1 | 0.582983593 | 2.19E-50  | postive |
| MAPK8     | AC073487.1 | 0.402702875 | 1.97E-22  | postive |
| LINC00472 | AC073487.1 | 0.727312473 | 7.67E-90  | postive |
| ATM       | AC073487.1 | 0.663168673 | 1.40E-69  | postive |
| FBXW7     | AC073487.1 | 0.52151505  | 6.36E-39  | postive |
| TFAP2C    | AL135790.1 | 0.581538375 | 4.35E-50  | postive |
| HBA1      | AL135790.1 | 0.523861438 | 2.56E-39  | postive |
| FANCD2    | AC020915.1 | 0.405652464 | 9.11E-23  | postive |
| HELLS     | AC020915.1 | 0.531721268 | 1.15E-40  | postive |
| ZNF419    | AC020915.1 | 0.542362213 | 1.51E-42  | postive |
| TUBE1     | AC020915.1 | 0.475225788 | 1.02E-31  | postive |
| ALOX12    | AC020915.1 | 0.551261175 | 3.57E-44  | postive |
| GABPB1    | AC020915.1 | 0.493232432 | 2.17E-34  | postive |
| LINC00472 | AC020915.1 | 0.544621903 | 5.89E-43  | postive |
| ATM       | AC020915.1 | 0.503089939 | 6.37E-36  | postive |
| FBXW7     | AC020915.1 | 0.481377142 | 1.30E-32  | postive |

|           |            |              |           |          |
|-----------|------------|--------------|-----------|----------|
| ZNF419    | AC127502.2 | 0.404952624  | 1.10E-22  | postive  |
| TUBE1     | AC127502.2 | 0.431541243  | 7.38E-26  | postive  |
| ALOX12    | AC127502.2 | 0.418833769  | 2.63E-24  | postive  |
| PHKG2     | AC127502.2 | 0.553871784  | 1.17E-44  | postive  |
| TAZ       | AC127502.2 | 0.666699335  | 1.45E-70  | postive  |
| MAPK1     | AC124854.1 | 0.452114084  | 1.64E-28  | postive  |
| MAPK8     | AC124854.1 | 0.483601095  | 6.09E-33  | postive  |
| PRKAA2    | AC124854.1 | 0.50757467   | 1.23E-36  | postive  |
| SIRT1     | AC124854.1 | 0.458517177  | 2.24E-29  | postive  |
| ZNF419    | AL358472.2 | 0.603374284  | 9.37E-55  | postive  |
| VEGFA     | AL358472.2 | 0.452087238  | 1.65E-28  | postive  |
| TUBE1     | AL358472.2 | 0.532701702  | 7.76E-41  | postive  |
| ALOX12    | AL358472.2 | 0.526024765  | 1.10E-39  | postive  |
| GABPB1    | AL358472.2 | 0.439059903  | 8.30E-27  | postive  |
| YY1AP1    | AL358472.2 | 0.403567182  | 1.57E-22  | postive  |
| TAZ       | AL358472.2 | 0.56428788   | 1.21E-46  | postive  |
| TUBE1     | LINC01138  | 0.41548853   | 6.56E-24  | postive  |
| ALOX12    | LINC01138  | 0.458912411  | 1.98E-29  | postive  |
| PHKG2     | LINC01138  | 0.525406679  | 1.40E-39  | postive  |
| TAZ       | LINC01138  | 0.513367852  | 1.42E-37  | postive  |
| HELLS     | AC108449.2 | 0.439139765  | 8.11E-27  | postive  |
| MTOR      | AC108449.2 | 0.523480343  | 2.97E-39  | postive  |
| OTUB1     | AC108449.2 | -0.409728025 | 3.10E-23  | negative |
| OXSRI     | AC108449.2 | 0.402244686  | 2.22E-22  | postive  |
| ZNF419    | AC108449.2 | 0.413004537  | 1.29E-23  | postive  |
| KLHL24    | AC108449.2 | 0.540971718  | 2.68E-42  | postive  |
| TUBE1     | AC108449.2 | 0.460666495  | 1.14E-29  | postive  |
| MAP3K5    | AC108449.2 | 0.450987222  | 2.31E-28  | postive  |
| ALOX12    | AC108449.2 | 0.480383108  | 1.82E-32  | postive  |
| IREB2     | AC108449.2 | 0.682764292  | 3.24E-75  | postive  |
| SP1       | AC108449.2 | 0.430843802  | 9.02E-26  | postive  |
| GABPB1    | AC108449.2 | 0.569509268  | 1.15E-47  | postive  |
| PIK3CA    | AC108449.2 | 0.625465827  | 7.40E-60  | postive  |
| KRAS      | AC108449.2 | 0.48773332   | 1.47E-33  | postive  |
| ATG7      | AC108449.2 | 0.417428495  | 3.86E-24  | postive  |
| ZEB1      | AC108449.2 | 0.517586093  | 2.87E-38  | postive  |
| MAPK8     | AC108449.2 | 0.637708864  | 7.25E-63  | postive  |
| LINC00472 | AC108449.2 | 0.719972695  | 3.09E-87  | postive  |
| PRKAA2    | AC108449.2 | 0.533555557  | 5.50E-41  | postive  |
| PRKAA1    | AC108449.2 | 0.503426611  | 5.63E-36  | postive  |
| TLR4      | AC108449.2 | 0.454054785  | 9.00E-29  | postive  |
| ATM       | AC108449.2 | 0.767135284  | 1.29E-105 | postive  |
| FBXW7     | AC108449.2 | 0.492977259  | 2.37E-34  | postive  |
| FH        | PART1      | 0.509196206  | 6.75E-37  | postive  |
| ISCU      | PART1      | 0.579318334  | 1.24E-49  | postive  |
| KLHL24    | PART1      | 0.513053331  | 1.60E-37  | postive  |
| SLC2A8    | PART1      | 0.423513285  | 7.17E-25  | postive  |
| SLC2A12   | PART1      | 0.455083852  | 6.54E-29  | postive  |
| GOT1      | PART1      | 0.511293986  | 3.09E-37  | postive  |
| ATG4D     | PART1      | 0.520320027  | 1.01E-38  | postive  |
| GABARAPL2 | PART1      | 0.531200157  | 1.41E-40  | postive  |
| GABARAPL1 | PART1      | 0.648207996  | 1.48E-65  | postive  |
| WIPI2     | PART1      | 0.528115652  | 4.82E-40  | postive  |
| LINC00472 | PART1      | 0.416066805  | 5.60E-24  | postive  |
| LPIN1     | PART1      | 0.532251957  | 9.29E-41  | postive  |
| FANCD2    | AC022211.3 | 0.585776157  | 5.76E-51  | postive  |
| HELLS     | AC022211.3 | 0.53086429   | 1.62E-40  | postive  |
| ALOX12    | AC022211.3 | 0.534697989  | 3.47E-41  | postive  |

|           |            |              |          |          |
|-----------|------------|--------------|----------|----------|
| TFAP2C    | AC022211.3 | 0.401787918  | 2.50E-22 | postive  |
| TFAP2C    | AL109936.2 | 0.454285417  | 8.38E-29 | postive  |
| HBA1      | AL109936.2 | 0.491423595  | 4.09E-34 | postive  |
| NCF2      | PELATON    | 0.668912884  | 3.45E-71 | postive  |
| FTL       | PELATON    | 0.587371398  | 2.67E-51 | postive  |
| CAPG      | PELATON    | 0.409341199  | 3.43E-23 | postive  |
| PGD       | PELATON    | 0.550855194  | 4.25E-44 | postive  |
| ALOX15B   | PELATON    | 0.420704296  | 1.57E-24 | postive  |
| KLHL24    | AP003059.2 | 0.41827922   | 3.06E-24 | postive  |
| TUBE1     | AP003059.2 | 0.444338295  | 1.73E-27 | postive  |
| ALOX12    | AP003059.2 | 0.413432354  | 1.14E-23 | postive  |
| GABPB1    | AP003059.2 | 0.407890802  | 5.05E-23 | postive  |
| LINC00472 | AP003059.2 | 0.695752533  | 3.34E-79 | postive  |
| LPIN1     | AP003059.2 | 0.416654391  | 4.77E-24 | postive  |
| ATM       | AP003059.2 | 0.545118619  | 4.79E-43 | postive  |
| HELLS     | AC103739.1 | 0.500621153  | 1.56E-35 | postive  |
| KLHL24    | AC103739.1 | 0.400462055  | 3.53E-22 | postive  |
| TUBE1     | AC103739.1 | 0.431711614  | 7.03E-26 | postive  |
| ALOX12    | AC103739.1 | 0.426656745  | 2.97E-25 | postive  |
| GABPB1    | AC103739.1 | 0.552962581  | 1.72E-44 | postive  |
| ATG7      | AC103739.1 | 0.409781463  | 3.05E-23 | postive  |
| MAPK8     | AC103739.1 | 0.419449371  | 2.22E-24 | postive  |
| LINC00472 | AC103739.1 | 0.740673256  | 8.26E-95 | postive  |
| ATM       | AC103739.1 | 0.709510965  | 1.15E-83 | postive  |
| FBXW7     | AC103739.1 | 0.500052184  | 1.91E-35 | postive  |
| HELLS     | AC004908.3 | 0.447023843  | 7.72E-28 | postive  |
| ZNF419    | AC004908.3 | 0.419563733  | 2.15E-24 | postive  |
| TUBE1     | AC004908.3 | 0.502460711  | 8.00E-36 | postive  |
| GABPB1    | AC004908.3 | 0.41641939   | 5.09E-24 | postive  |
| LINC00472 | AC004908.3 | 0.52946141   | 2.83E-40 | postive  |
| TAZ       | AC004908.3 | 0.410833906  | 2.30E-23 | postive  |
| HELLS     | RUFY1-AS1  | 0.448693543  | 4.65E-28 | postive  |
| ZNF419    | RUFY1-AS1  | 0.52030028   | 1.02E-38 | postive  |
| VEGFA     | RUFY1-AS1  | 0.477279968  | 5.14E-32 | postive  |
| TUBE1     | RUFY1-AS1  | 0.635598422  | 2.45E-62 | postive  |
| SETD1B    | RUFY1-AS1  | 0.471097195  | 3.97E-31 | postive  |
| ALOX12    | RUFY1-AS1  | 0.703298926  | 1.28E-81 | postive  |
| GABPB1    | RUFY1-AS1  | 0.484174471  | 5.01E-33 | postive  |
| ATM       | RUFY1-AS1  | 0.664292322  | 6.83E-70 | postive  |
| TAZ       | RUFY1-AS1  | 0.402328623  | 2.17E-22 | postive  |
| FBXW7     | RUFY1-AS1  | 0.50243295   | 8.08E-36 | postive  |
| ENPP2     | AL359853.1 | 0.440113083  | 6.09E-27 | postive  |
| SLC1A4    | AL359853.1 | 0.406860295  | 6.63E-23 | postive  |
| HSPA5     | AC012409.3 | -0.405682878 | 9.04E-23 | negative |
| ZNF419    | AC012409.3 | 0.463847876  | 4.14E-30 | postive  |
| VEGFA     | AC012409.3 | 0.526773182  | 8.18E-40 | postive  |
| TUBE1     | AC012409.3 | 0.648052335  | 1.62E-65 | postive  |
| ALOX12    | AC012409.3 | 0.591349233  | 3.85E-52 | postive  |
| GABPB1    | AC012409.3 | 0.426386107  | 3.20E-25 | postive  |
| ATM       | AC012409.3 | 0.495491214  | 9.75E-35 | postive  |
| TAZ       | AC012409.3 | 0.515588264  | 6.14E-38 | postive  |
| FBXW7     | AC012409.3 | 0.424213073  | 5.90E-25 | postive  |
| HELLS     | AC006270.1 | 0.507438325  | 1.29E-36 | postive  |
| TFAP2C    | AC006270.1 | 0.426584722  | 3.03E-25 | postive  |
| HBA1      | AC006270.1 | 0.438617384  | 9.46E-27 | postive  |
| DUOX1     | AC006270.1 | 0.431341523  | 7.82E-26 | postive  |
| LINC00472 | AC006270.1 | 0.401609302  | 2.62E-22 | postive  |
| ATM       | AC006270.1 | 0.421953504  | 1.11E-24 | postive  |

|           |            |              |          |          |
|-----------|------------|--------------|----------|----------|
| ZNF419    | SLC25A25-A | 0.49161806   | 3.82E-34 | postive  |
| PHKG2     | SLC25A25-A | 0.41616127   | 5.46E-24 | postive  |
| ATG4D     | SLC25A25-A | 0.509413597  | 6.23E-37 | postive  |
| GABARAPL1 | SLC25A25-A | 0.419254364  | 2.34E-24 | postive  |
| LPIN1     | SLC25A25-A | 0.546904633  | 2.26E-43 | postive  |
| TAZ       | SLC25A25-A | 0.424460222  | 5.50E-25 | postive  |
| ALOX12    | AC012184.3 | 0.403110696  | 1.77E-22 | postive  |
| ISCU      | LINC01543  | 0.580797737  | 6.17E-50 | postive  |
| ALB       | LINC01543  | 0.401014398  | 3.06E-22 | postive  |
| CS        | LINC01543  | 0.418135474  | 3.18E-24 | postive  |
| GABARAPL1 | LINC01543  | 0.513526866  | 1.34E-37 | postive  |
| CDO1      | LINC01543  | 0.402100384  | 2.31E-22 | postive  |
| LPIN1     | LINC01543  | 0.411435942  | 1.96E-23 | postive  |
| HELLS     | MIR17HG    | 0.447214185  | 7.29E-28 | postive  |
| TUBE1     | MIR17HG    | 0.434995596  | 2.72E-26 | postive  |
| GABPB1    | MIR17HG    | 0.515755451  | 5.77E-38 | postive  |
| MAPK8     | MIR17HG    | 0.440490536  | 5.44E-27 | postive  |
| LINC00472 | MIR17HG    | 0.54148595   | 2.17E-42 | postive  |
| ATM       | MIR17HG    | 0.642286784  | 5.01E-64 | postive  |
| FBXW7     | MIR17HG    | 0.489680655  | 7.51E-34 | postive  |
| HELLS     | H3-3A-DT   | 0.512268593  | 2.15E-37 | postive  |
| ZNF419    | H3-3A-DT   | 0.427756259  | 2.17E-25 | postive  |
| TUBE1     | H3-3A-DT   | 0.555708949  | 5.27E-45 | postive  |
| ALOX12    | H3-3A-DT   | 0.560185029  | 7.46E-46 | postive  |
| GABPB1    | H3-3A-DT   | 0.563142957  | 2.01E-46 | postive  |
| LINC00472 | H3-3A-DT   | 0.570314637  | 7.99E-48 | postive  |
| ATM       | H3-3A-DT   | 0.724040528  | 1.14E-88 | postive  |
| FBXW7     | H3-3A-DT   | 0.441777544  | 3.72E-27 | postive  |
| PHKG2     | AC016027.1 | 0.539394521  | 5.13E-42 | postive  |
| EPAS1     | AC016027.1 | -0.500174966 | 1.83E-35 | negative |
| LINC00472 | AP003110.1 | 0.520072431  | 1.11E-38 | postive  |
| HELLS     | ZNF197-AS1 | 0.405564502  | 9.33E-23 | postive  |
| KLHL24    | ZNF197-AS1 | 0.481110782  | 1.42E-32 | postive  |
| IREB2     | ZNF197-AS1 | 0.401928005  | 2.41E-22 | postive  |
| GABPB1    | ZNF197-AS1 | 0.554502599  | 8.88E-45 | postive  |
| PIK3CA    | ZNF197-AS1 | 0.414810087  | 7.88E-24 | postive  |
| ATG7      | ZNF197-AS1 | 0.459233501  | 1.79E-29 | postive  |
| LINC00472 | ZNF197-AS1 | 0.721090688  | 1.25E-87 | postive  |
| ATM       | ZNF197-AS1 | 0.563091567  | 2.06E-46 | postive  |
| HELLS     | L3MBTL2-AS | 0.423622726  | 6.96E-25 | postive  |
| ZNF419    | L3MBTL2-AS | 0.438800321  | 8.96E-27 | postive  |
| ALOX12    | L3MBTL2-AS | 0.490761455  | 5.15E-34 | postive  |
| GABPB1    | L3MBTL2-AS | 0.472390183  | 2.60E-31 | postive  |
| ATM       | L3MBTL2-AS | 0.427071488  | 2.64E-25 | postive  |
| FBXW7     | L3MBTL2-AS | 0.468121029  | 1.05E-30 | postive  |
| TFAP2C    | AC005014.2 | 0.517795658  | 2.65E-38 | postive  |
| HBA1      | AC005014.2 | 0.425153405  | 4.53E-25 | postive  |
| ALOX12    | AC005280.1 | 0.434167573  | 3.46E-26 | postive  |
| ZEB1      | LINC02685  | 0.586330159  | 4.41E-51 | postive  |
| EPAS1     | LINC02685  | 0.490869486  | 4.96E-34 | postive  |
| PHKG2     | AC127537.1 | 0.449421066  | 3.73E-28 | postive  |
| HELLS     | AL513327.2 | 0.515658748  | 5.98E-38 | postive  |
| ZNF419    | AL513327.2 | 0.444907564  | 1.46E-27 | postive  |
| TUBE1     | AL513327.2 | 0.451564348  | 1.94E-28 | postive  |
| ALOX12    | AL513327.2 | 0.518960801  | 1.70E-38 | postive  |
| GABPB1    | AL513327.2 | 0.559175298  | 1.16E-45 | postive  |
| MAPK8     | AL513327.2 | 0.423844137  | 6.54E-25 | postive  |
| LINC00472 | AL513327.2 | 0.676805822  | 1.86E-73 | postive  |

|           |            |             |           |         |
|-----------|------------|-------------|-----------|---------|
| ATM       | AL513327.2 | 0.695427953 | 4.23E-79  | postive |
| FBXW7     | AL513327.2 | 0.482859688 | 7.84E-33  | postive |
| ZNF419    | SUGT1-DT   | 0.495155667 | 1.10E-34  | postive |
| TUBE1     | SUGT1-DT   | 0.5197994   | 1.23E-38  | postive |
| ALOX12    | SUGT1-DT   | 0.483159798 | 7.08E-33  | postive |
| PHKG2     | SUGT1-DT   | 0.61317502  | 5.73E-57  | postive |
| TAZ       | SUGT1-DT   | 0.676627239 | 2.10E-73  | postive |
| HELLS     | AL731568.1 | 0.491492304 | 3.99E-34  | postive |
| KLHL24    | AL731568.1 | 0.464101789 | 3.82E-30  | postive |
| IREB2     | AL731568.1 | 0.41345522  | 1.14E-23  | postive |
| GABPB1    | AL731568.1 | 0.554094188 | 1.06E-44  | postive |
| PIK3CA    | AL731568.1 | 0.436808362 | 1.61E-26  | postive |
| ATG7      | AL731568.1 | 0.462772464 | 5.83E-30  | postive |
| MAPK8     | AL731568.1 | 0.400789429 | 3.24E-22  | postive |
| LINC00472 | AL731568.1 | 0.806442381 | 1.25E-124 | postive |
| ATM       | AL731568.1 | 0.692610677 | 3.22E-78  | postive |
| FBXW7     | AL731568.1 | 0.456053485 | 4.84E-29  | postive |
| ZNF419    | AC006042.1 | 0.550833798 | 4.29E-44  | postive |
| TUBE1     | AC006042.1 | 0.424540364 | 5.38E-25  | postive |
| GABPB1    | AC006042.1 | 0.430735533 | 9.30E-26  | postive |
| LINC00472 | AC006042.1 | 0.582200797 | 3.17E-50  | postive |
| LPIN1     | AC006042.1 | 0.520934326 | 7.95E-39  | postive |
| FANCD2    | LINC00539  | 0.483371501 | 6.59E-33  | postive |
| HELLS     | LINC00539  | 0.505216376 | 2.93E-36  | postive |
| TUBE1     | LINC00539  | 0.467562476 | 1.25E-30  | postive |
| ALOX12    | LINC00539  | 0.563662207 | 1.60E-46  | postive |
| GABPB1    | LINC00539  | 0.477889524 | 4.20E-32  | postive |
| IFNG      | LINC00539  | 0.560697839 | 5.95E-46  | postive |
| ATM       | LINC00539  | 0.57196883  | 3.75E-48  | postive |
| FBXW7     | LINC00539  | 0.481626015 | 1.19E-32  | postive |
| MUC1      | LINC00511  | 0.561110137 | 4.96E-46  | postive |
| SLC7A5    | LINC00511  | 0.554242803 | 9.93E-45  | postive |
| SLC2A1    | LINC00511  | 0.512985822 | 1.64E-37  | postive |
| GABPB1    | AC009041.3 | 0.476320675 | 7.08E-32  | postive |
| LINC00472 | AC009041.3 | 0.447687937 | 6.32E-28  | postive |
| ATM       | AC009041.3 | 0.433557428 | 4.13E-26  | postive |
| TUBE1     | AC116025.1 | 0.4185848   | 2.81E-24  | postive |
| ALOX12    | AC116025.1 | 0.54196184  | 1.78E-42  | postive |
| ATM       | AC116025.1 | 0.547836146 | 1.53E-43  | postive |
| TFAP2C    | AL136131.2 | 0.561466319 | 4.24E-46  | postive |
| HBA1      | AL136131.2 | 0.52710787  | 7.17E-40  | postive |
| DUOX1     | AL136131.2 | 0.4222321   | 1.03E-24  | postive |
| ALOX12    | LINC02068  | 0.40082525  | 3.21E-22  | postive |
| ATM       | LINC02068  | 0.454701802 | 7.36E-29  | postive |
| ZNF419    | AL109659.2 | 0.490716205 | 5.23E-34  | postive |
| VEGFA     | AL109659.2 | 0.462392665 | 6.58E-30  | postive |
| TUBE1     | AL109659.2 | 0.532846583 | 7.32E-41  | postive |
| SETD1B    | AL109659.2 | 0.438383233 | 1.01E-26  | postive |
| ALOX12    | AL109659.2 | 0.601513525 | 2.42E-54  | postive |
| ATM       | AL109659.2 | 0.479438437 | 2.50E-32  | postive |
| TAZ       | AL109659.2 | 0.501714365 | 1.05E-35  | postive |
| FBXW7     | AL109659.2 | 0.459893129 | 1.45E-29  | postive |
| HSPB1     | SNHG19     | 0.462788317 | 5.80E-30  | postive |
| RPL8      | SNHG19     | 0.495648828 | 9.22E-35  | postive |
| HBA1      | SNHG19     | 0.631387551 | 2.70E-61  | postive |
| HRAS      | SNHG19     | 0.769039969 | 1.89E-106 | postive |
| MAP1LC3A  | SNHG19     | 0.451594572 | 1.92E-28  | postive |
| EGLN2     | SNHG19     | 0.8614664   | 3.67E-160 | postive |



|           |            |              |          |          |
|-----------|------------|--------------|----------|----------|
| HELLS     | AC009268.2 | 0.498552995  | 3.27E-35 | postive  |
| GABPB1    | AC009268.2 | 0.465653784  | 2.32E-30 | postive  |
| LINC00472 | AC009268.2 | 0.659397728  | 1.52E-68 | postive  |
| ATM       | AC009268.2 | 0.453856603  | 9.56E-29 | postive  |
| HELLS     | LINC01545  | 0.40305208   | 1.80E-22 | postive  |
| TFAP2C    | LINC01545  | 0.408619427  | 4.16E-23 | postive  |
| HSPA5     | AC024075.2 | -0.455061222 | 6.59E-29 | negative |
| ZNF419    | AC024075.2 | 0.543020898  | 1.15E-42 | postive  |
| TUBE1     | AC024075.2 | 0.498471626  | 3.37E-35 | postive  |
| ALOX12    | AC024075.2 | 0.47048598   | 4.85E-31 | postive  |
| NCOA4     | AC024075.2 | -0.422481916 | 9.57E-25 | negative |
| PHKG2     | AC024075.2 | 0.491896055  | 3.46E-34 | postive  |
| TAZ       | AC024075.2 | 0.562598535  | 2.57E-46 | postive  |
| ZNF419    | CSGALNACT: | 0.440385374  | 5.62E-27 | postive  |
| ALOX12    | CSGALNACT: | 0.468834686  | 8.30E-31 | postive  |
| PHKG2     | CSGALNACT: | 0.613445513  | 4.96E-57 | postive  |
| TAZ       | CSGALNACT: | 0.688518152  | 5.89E-77 | postive  |
| ZNF419    | AC011498.6 | 0.453494603  | 1.07E-28 | postive  |
| TUBE1     | AC011498.6 | 0.452217024  | 1.59E-28 | postive  |
| SETD1B    | AC011498.6 | 0.411176586  | 2.10E-23 | postive  |
| ALOX12    | AC011498.6 | 0.549111768  | 8.91E-44 | postive  |
| TAZ       | AC011498.6 | 0.487872123  | 1.41E-33 | postive  |
| PHKG2     | AC098479.1 | 0.413606174  | 1.09E-23 | postive  |
| VDAC2     | ZFAS1      | 0.414847445  | 7.80E-24 | postive  |
| RPL8      | ZFAS1      | 0.532727824  | 7.68E-41 | postive  |
| FANCD2    | RNF139-AS1 | 0.41762907   | 3.66E-24 | postive  |
| HELLS     | RNF139-AS1 | 0.530483028  | 1.88E-40 | postive  |
| ZNF419    | RNF139-AS1 | 0.592929245  | 1.77E-52 | postive  |
| TUBE1     | RNF139-AS1 | 0.605228361  | 3.62E-55 | postive  |
| SETD1B    | RNF139-AS1 | 0.437701507  | 1.24E-26 | postive  |
| ALOX12    | RNF139-AS1 | 0.646299714  | 4.64E-65 | postive  |
| GABPB1    | RNF139-AS1 | 0.473725466  | 1.67E-31 | postive  |
| PHKG2     | RNF139-AS1 | 0.520012368  | 1.13E-38 | postive  |
| ATM       | RNF139-AS1 | 0.501991312  | 9.48E-36 | postive  |
| TAZ       | RNF139-AS1 | 0.591126919  | 4.29E-52 | postive  |
| FBXW7     | RNF139-AS1 | 0.455003358  | 6.71E-29 | postive  |
| PROM2     | U62317.3   | 0.638917227  | 3.60E-63 | postive  |
| EGLN2     | U62317.3   | 0.411279393  | 2.04E-23 | postive  |
| VEGFA     | AL645608.1 | 0.561838906  | 3.59E-46 | postive  |
| TUBE1     | AL645608.1 | 0.412030715  | 1.67E-23 | postive  |
| SETD1B    | AL645608.1 | 0.460329835  | 1.27E-29 | postive  |
| ALOX12    | AL645608.1 | 0.468758812  | 8.51E-31 | postive  |
| TAZ       | AL645608.1 | 0.481990248  | 1.05E-32 | postive  |
| NOX1      | AL358472.3 | 0.451293868  | 2.10E-28 | postive  |
| NCOA4     | AL358472.3 | -0.438149601 | 1.08E-26 | negative |
| PHKG2     | AL358472.3 | 0.535215306  | 2.82E-41 | postive  |
| TAZ       | AL358472.3 | 0.502232698  | 8.69E-36 | postive  |
| TFAP2C    | LINC01985  | 0.579476014  | 1.15E-49 | postive  |
| HBA1      | LINC01985  | 0.526006364  | 1.11E-39 | postive  |
| TUBE1     | ELOA-AS1   | 0.41078448   | 2.33E-23 | postive  |
| ALOX12    | ELOA-AS1   | 0.531790925  | 1.12E-40 | postive  |
| TAZ       | ELOA-AS1   | 0.415984384  | 5.73E-24 | postive  |
| IL6       | AC148477.2 | 0.42436276   | 5.66E-25 | postive  |
| HSPA5     | AC016957.2 | -0.425427435 | 4.19E-25 | negative |
| VDAC2     | AC016957.2 | -0.440034067 | 6.23E-27 | negative |
| LAMP2     | AC016957.2 | -0.405896298 | 8.55E-23 | negative |
| SRXN1     | AC016957.2 | -0.410938188 | 2.24E-23 | negative |
| ZNF419    | AC016957.2 | 0.459201767  | 1.81E-29 | postive  |

|           |            |              |          |          |
|-----------|------------|--------------|----------|----------|
| TUBE1     | AC016957.2 | 0.446065263  | 1.03E-27 | postive  |
| ALOX12    | AC016957.2 | 0.403312138  | 1.68E-22 | postive  |
| GABPB1    | AC016957.2 | 0.405640833  | 9.14E-23 | postive  |
| NOX1      | AC016957.2 | 0.401876762  | 2.45E-22 | postive  |
| NCOA4     | AC016957.2 | -0.425385466 | 4.24E-25 | negative |
| PHKG2     | AC016957.2 | 0.548227484  | 1.30E-43 | postive  |
| BECN1     | AC016957.2 | -0.466543573 | 1.74E-30 | negative |
| TAZ       | AC016957.2 | 0.602986879  | 1.14E-54 | postive  |
| FBXW7     | AC016957.2 | 0.473324552  | 1.91E-31 | postive  |
| LINC00472 | ZBED3-AS1  | 0.483231498  | 6.91E-33 | postive  |
| ZNF419    | AC139795.2 | 0.422054283  | 1.08E-24 | postive  |
| SETD1B    | AC139795.2 | 0.440385714  | 5.61E-27 | postive  |
| ALOX12    | AC139795.2 | 0.451490964  | 1.98E-28 | postive  |
| LINC00472 | AC139795.2 | 0.404726581  | 1.16E-22 | postive  |
| LPIN1     | AC139795.2 | 0.46076677   | 1.10E-29 | postive  |
| ATM       | AC139795.2 | 0.427939294  | 2.06E-25 | postive  |
| HELLS     | AC067747.1 | 0.523889855  | 2.53E-39 | postive  |
| TUBE1     | AC067747.1 | 0.407149803  | 6.14E-23 | postive  |
| ALOX12    | AC067747.1 | 0.527148541  | 7.05E-40 | postive  |
| GABPB1    | AC067747.1 | 0.445919611  | 1.08E-27 | postive  |
| DUOX1     | AC067747.1 | 0.443004495  | 2.58E-27 | postive  |
| ATM       | AC067747.1 | 0.459636942  | 1.57E-29 | postive  |
| FBXW7     | AC067747.1 | 0.4274096    | 2.40E-25 | postive  |
| LINC00472 | ITGA6-AS1  | 0.710551584  | 5.17E-84 | postive  |
| HIC1      | AL590226.1 | 0.402618677  | 2.02E-22 | postive  |
| MAPK3     | AL590226.1 | 0.467069384  | 1.47E-30 | postive  |
| ZEB1      | AL590226.1 | 0.442742057  | 2.79E-27 | postive  |
| EPAS1     | AL590226.1 | 0.524222905  | 2.22E-39 | postive  |
| HELLS     | AL354696.1 | 0.510176761  | 4.69E-37 | postive  |
| ZNF419    | AL354696.1 | 0.408886145  | 3.87E-23 | postive  |
| TUBE1     | AL354696.1 | 0.521848302  | 5.59E-39 | postive  |
| ALOX12    | AL354696.1 | 0.492384306  | 2.92E-34 | postive  |
| GABPB1    | AL354696.1 | 0.4381       | 1.10E-26 | postive  |
| ATM       | AL354696.1 | 0.508036826  | 1.04E-36 | postive  |
| FANCD2    | LINC00528  | 0.434755844  | 2.92E-26 | postive  |
| PML       | LINC00528  | 0.504645696  | 3.61E-36 | postive  |
| ZNF419    | LINC00528  | 0.414806195  | 7.89E-24 | postive  |
| SLC2A6    | LINC00528  | 0.471954897  | 3.00E-31 | postive  |
| ALOX12    | LINC00528  | 0.448947778  | 4.31E-28 | postive  |
| PHKG2     | LINC00528  | 0.429492747  | 1.33E-25 | postive  |
| IFNG      | LINC00528  | 0.451368926  | 2.06E-28 | postive  |
| TAZ       | LINC00528  | 0.526029683  | 1.10E-39 | postive  |
| HELLS     | AL133227.1 | 0.496605322  | 6.56E-35 | postive  |
| KLHL24    | AL133227.1 | 0.404484947  | 1.24E-22 | postive  |
| TUBE1     | AL133227.1 | 0.423547462  | 7.11E-25 | postive  |
| ALOX12    | AL133227.1 | 0.505063174  | 3.10E-36 | postive  |
| IREB2     | AL133227.1 | 0.481530105  | 1.23E-32 | postive  |
| GABPB1    | AL133227.1 | 0.503978979  | 4.60E-36 | postive  |
| PIK3CA    | AL133227.1 | 0.42035662   | 1.73E-24 | postive  |
| MAPK8     | AL133227.1 | 0.470768794  | 4.42E-31 | postive  |
| LINC00472 | AL133227.1 | 0.668621212  | 4.18E-71 | postive  |
| ATM       | AL133227.1 | 0.637802925  | 6.87E-63 | postive  |
| FBXW7     | AL133227.1 | 0.459877295  | 1.46E-29 | postive  |
| ALOX12    | AC084125.2 | 0.405532697  | 9.41E-23 | postive  |
| PHKG2     | AC084125.2 | 0.468781885  | 8.45E-31 | postive  |
| TAZ       | AC084125.2 | 0.56174985   | 3.74E-46 | postive  |
| HELLS     | AC004943.1 | 0.511992836  | 2.38E-37 | postive  |
| KLHL24    | AC004943.1 | 0.484871646  | 3.95E-33 | postive  |

|           |            |              |           |          |
|-----------|------------|--------------|-----------|----------|
| TUBE1     | AC004943.1 | 0.468203648  | 1.02E-30  | postive  |
| ALOX12    | AC004943.1 | 0.413208126  | 1.22E-23  | postive  |
| IREB2     | AC004943.1 | 0.449061602  | 4.16E-28  | postive  |
| GABPB1    | AC004943.1 | 0.570866882  | 6.21E-48  | postive  |
| PIK3CA    | AC004943.1 | 0.451743307  | 1.83E-28  | postive  |
| ATG7      | AC004943.1 | 0.427805428  | 2.14E-25  | postive  |
| MAPK8     | AC004943.1 | 0.445461562  | 1.24E-27  | postive  |
| LINC00472 | AC004943.1 | 0.834058309  | 7.94E-141 | postive  |
| ATM       | AC004943.1 | 0.714162087  | 3.11E-85  | postive  |
| FBXW7     | AC004943.1 | 0.466379796  | 1.84E-30  | postive  |
| ACSL3     | AL450263.1 | 0.422779219  | 8.81E-25  | postive  |
| KLHL24    | AL450263.1 | 0.655831551  | 1.41E-67  | postive  |
| IREB2     | AL450263.1 | 0.404668498  | 1.18E-22  | postive  |
| PIK3CA    | AL450263.1 | 0.453096089  | 1.21E-28  | postive  |
| KRAS      | AL450263.1 | 0.423710189  | 6.79E-25  | postive  |
| GABARAPL1 | AL450263.1 | 0.532214731  | 9.43E-41  | postive  |
| LINC00472 | AL450263.1 | 0.822027002  | 2.00E-133 | postive  |
| LPIN1     | AL450263.1 | 0.645482841  | 7.55E-65  | postive  |
| HELLS     | SMC5-AS1   | 0.437328236  | 1.38E-26  | postive  |
| ZNF419    | SMC5-AS1   | 0.451539889  | 1.95E-28  | postive  |
| KLHL24    | SMC5-AS1   | 0.526940431  | 7.66E-40  | postive  |
| TUBE1     | SMC5-AS1   | 0.453041732  | 1.23E-28  | postive  |
| IREB2     | SMC5-AS1   | 0.450020609  | 3.11E-28  | postive  |
| GABPB1    | SMC5-AS1   | 0.505979401  | 2.21E-36  | postive  |
| PIK3CA    | SMC5-AS1   | 0.415600234  | 6.36E-24  | postive  |
| ATG7      | SMC5-AS1   | 0.428009942  | 2.02E-25  | postive  |
| MAPK8     | SMC5-AS1   | 0.404102764  | 1.37E-22  | postive  |
| LINC00472 | SMC5-AS1   | 0.687419785  | 1.27E-76  | postive  |
| LPIN1     | SMC5-AS1   | 0.464218923  | 3.68E-30  | postive  |
| ATM       | SMC5-AS1   | 0.617681906  | 5.17E-58  | postive  |
| FBXW7     | SMC5-AS1   | 0.41821304   | 3.11E-24  | postive  |
| FANCD2    | LASTR      | 0.497441517  | 4.87E-35  | postive  |
| JDP2      | LASTR      | 0.510367238  | 4.37E-37  | postive  |
| RGS4      | LASTR      | 0.422376542  | 9.85E-25  | postive  |
| EIF2S1    | LASTR      | 0.447550868  | 6.58E-28  | postive  |
| STMN1     | LASTR      | 0.46699599   | 1.51E-30  | postive  |
| RRM2      | LASTR      | 0.500933241  | 1.39E-35  | postive  |
| AURKA     | LASTR      | 0.49727104   | 5.18E-35  | postive  |
| SLC1A5    | LASTR      | 0.432251125  | 6.02E-26  | postive  |
| CDKN2A    | LASTR      | 0.451473626  | 1.99E-28  | postive  |
| MTOR      | AC234775.2 | 0.500569628  | 1.59E-35  | postive  |
| ACSL3     | AC234775.2 | 0.455817318  | 5.21E-29  | postive  |
| OTUB1     | AC234775.2 | -0.410148471 | 2.77E-23  | negative |
| OXSR1     | AC234775.2 | 0.412855746  | 1.34E-23  | postive  |
| KLHL24    | AC234775.2 | 0.701608327  | 4.53E-81  | postive  |
| MAP3K5    | AC234775.2 | 0.521082478  | 7.51E-39  | postive  |
| EIF2AK4   | AC234775.2 | 0.466042656  | 2.05E-30  | postive  |
| IREB2     | AC234775.2 | 0.725104397  | 4.75E-89  | postive  |
| GABPB1    | AC234775.2 | 0.530780959  | 1.67E-40  | postive  |
| EMC2      | AC234775.2 | 0.433764727  | 3.89E-26  | postive  |
| PIK3CA    | AC234775.2 | 0.719420296  | 4.81E-87  | postive  |
| KRAS      | AC234775.2 | 0.569755446  | 1.03E-47  | postive  |
| SLC38A1   | AC234775.2 | 0.444779441  | 1.52E-27  | postive  |
| MAPK8     | AC234775.2 | 0.608028919  | 8.51E-56  | postive  |
| MAPK9     | AC234775.2 | 0.416736259  | 4.67E-24  | postive  |
| LINC00472 | AC234775.2 | 0.795520066  | 6.24E-119 | postive  |
| PRKAA2    | AC234775.2 | 0.571519748  | 4.61E-48  | postive  |
| PRKAA1    | AC234775.2 | 0.637336476  | 9.00E-63  | postive  |

|           |            |              |          |          |
|-----------|------------|--------------|----------|----------|
| TGFBFR1   | AC234775.2 | 0.483927242  | 5.45E-33 | postive  |
| LPIN1     | AC234775.2 | 0.423095439  | 8.06E-25 | postive  |
| TLR4      | AC234775.2 | 0.425982131  | 3.59E-25 | postive  |
| ATM       | AC234775.2 | 0.707293889  | 6.28E-83 | postive  |
| FBXW7     | AC234775.2 | 0.449040709  | 4.19E-28 | postive  |
| BACH1     | AC234775.2 | 0.45456269   | 7.69E-29 | postive  |
| FANCD2    | AC079907.1 | 0.425265746  | 4.39E-25 | postive  |
| TFAP2C    | AC079907.1 | 0.54023968   | 3.63E-42 | postive  |
| HBA1      | AC079907.1 | 0.458261965  | 2.43E-29 | postive  |
| TFAP2C    | AL022313.2 | 0.419665161  | 2.09E-24 | postive  |
| ALOX12    | ARHGAP42-/ | 0.411010974  | 2.20E-23 | postive  |
| SRC       | SBNO1-AS1  | 0.422224224  | 1.03E-24 | postive  |
| NCOA4     | SBNO1-AS1  | -0.411281495 | 2.04E-23 | negative |
| PHKG2     | SBNO1-AS1  | 0.662568227  | 2.05E-69 | postive  |
| TAZ       | SBNO1-AS1  | 0.620299523  | 1.26E-58 | postive  |
| ZNF419    | DPP9-AS1   | 0.435396131  | 2.42E-26 | postive  |
| TUBE1     | DPP9-AS1   | 0.465854667  | 2.18E-30 | postive  |
| DRD4      | DPP9-AS1   | 0.436838644  | 1.59E-26 | postive  |
| ALOX12    | DPP9-AS1   | 0.613120852  | 5.89E-57 | postive  |
| PHKG2     | DPP9-AS1   | 0.486731485  | 2.08E-33 | postive  |
| TAZ       | DPP9-AS1   | 0.551416219  | 3.34E-44 | postive  |
| FBXW7     | DPP9-AS1   | 0.425520515  | 4.09E-25 | postive  |
| HELLS     | AC009095.1 | 0.556854897  | 3.20E-45 | postive  |
| ZNF419    | AC009095.1 | 0.439441884  | 7.42E-27 | postive  |
| TUBE1     | AC009095.1 | 0.484778291  | 4.08E-33 | postive  |
| ALOX12    | AC009095.1 | 0.586958053  | 3.26E-51 | postive  |
| GABPB1    | AC009095.1 | 0.495759829  | 8.86E-35 | postive  |
| DUOX1     | AC009095.1 | 0.406038035  | 8.23E-23 | postive  |
| LINC00472 | AC009095.1 | 0.511691005  | 2.67E-37 | postive  |
| ATM       | AC009095.1 | 0.556684574  | 3.45E-45 | postive  |
| FBXW7     | AC009095.1 | 0.51941231   | 1.43E-38 | postive  |
| ZNF419    | AL353803.5 | 0.450158315  | 2.98E-28 | postive  |
| TUBE1     | AL353803.5 | 0.435288007  | 2.50E-26 | postive  |
| ALOX12    | AL353803.5 | 0.561524758  | 4.13E-46 | postive  |
| GABPB1    | AL353803.5 | 0.421849802  | 1.14E-24 | postive  |
| ATM       | AL353803.5 | 0.435097873  | 2.64E-26 | postive  |
| ZNF419    | AL118558.4 | 0.431069251  | 8.45E-26 | postive  |
| ALOX12    | AL118558.4 | 0.428734767  | 1.65E-25 | postive  |
| PHKG2     | AL118558.4 | 0.430318651  | 1.05E-25 | postive  |
| ATG4D     | AL118558.4 | 0.422560623  | 9.36E-25 | postive  |
| ANO6      | AL118558.4 | -0.417751652 | 3.53E-24 | negative |
| TAZ       | AL118558.4 | 0.504379015  | 3.98E-36 | postive  |
| ALOX12    | AC104596.1 | 0.426169484  | 3.40E-25 | postive  |
| IREB2     | AC104596.1 | 0.488568078  | 1.10E-33 | postive  |
| MAPK8     | AC104596.1 | 0.420468814  | 1.67E-24 | postive  |
| PRKAA2    | AC104596.1 | 0.411264061  | 2.05E-23 | postive  |
| ATM       | AC104596.1 | 0.599597307  | 6.38E-54 | postive  |
| SIRT1     | AC104596.1 | 0.403655393  | 1.54E-22 | postive  |
| HELLS     | AL137847.2 | 0.520286866  | 1.02E-38 | postive  |
| TUBE1     | AL137847.2 | 0.467093349  | 1.46E-30 | postive  |
| ALOX12    | AL137847.2 | 0.485931439  | 2.74E-33 | postive  |
| GABPB1    | AL137847.2 | 0.492550765  | 2.75E-34 | postive  |
| LINC00472 | AL137847.2 | 0.464848137  | 3.01E-30 | postive  |
| ATM       | AL137847.2 | 0.68429062   | 1.13E-75 | postive  |
| FBXW7     | AL137847.2 | 0.432649096  | 5.37E-26 | postive  |
| FANCD2    | AL731569.1 | 0.436884566  | 1.57E-26 | postive  |
| HELLS     | AL731569.1 | 0.433457214  | 4.25E-26 | postive  |
| ZNF419    | AL731569.1 | 0.495123303  | 1.11E-34 | postive  |

|           |            |             |          |         |
|-----------|------------|-------------|----------|---------|
| TUBE1     | AL731569.1 | 0.454753299 | 7.25E-29 | postive |
| ALOX12    | AL731569.1 | 0.621965481 | 5.07E-59 | postive |
| PHKG2     | AL731569.1 | 0.408992361 | 3.77E-23 | postive |
| TAZ       | AL731569.1 | 0.487988026 | 1.35E-33 | postive |
| FANCD2    | AL354989.1 | 0.441497191 | 4.04E-27 | postive |
| HELLS     | AL354989.1 | 0.485357403 | 3.34E-33 | postive |
| ZNF419    | AL354989.1 | 0.447673767 | 6.34E-28 | postive |
| TUBE1     | AL354989.1 | 0.459275802 | 1.76E-29 | postive |
| ALOX12    | AL354989.1 | 0.525788867 | 1.20E-39 | postive |
| GABPB1    | AL354989.1 | 0.490293152 | 6.06E-34 | postive |
| LINC00472 | AL354989.1 | 0.57012592  | 8.70E-48 | postive |
| ATM       | AL354989.1 | 0.474774705 | 1.18E-31 | postive |
| FBXW7     | AL354989.1 | 0.473856676 | 1.60E-31 | postive |
| IL6       | LINC01503  | 0.424813479 | 4.98E-25 | postive |
| EPAS1     | AC002070.1 | 0.437664036 | 1.25E-26 | postive |
| HELLS     | AC006441.1 | 0.576783318 | 4.06E-49 | postive |
| TUBE1     | AC006441.1 | 0.465773357 | 2.23E-30 | postive |
| ALOX12    | AC006441.1 | 0.534455771 | 3.83E-41 | postive |
| GABPB1    | AC006441.1 | 0.519839799 | 1.21E-38 | postive |
| ATG7      | AC006441.1 | 0.428049391 | 2.00E-25 | postive |
| LINC00472 | AC006441.1 | 0.56189288  | 3.51E-46 | postive |
| ATM       | AC006441.1 | 0.695581134 | 3.78E-79 | postive |
| FBXW7     | AC006441.1 | 0.488229103 | 1.24E-33 | postive |
| VEGFA     | AC092118.2 | 0.488077903 | 1.31E-33 | postive |
| TUBE1     | AC092118.2 | 0.457025572 | 3.57E-29 | postive |
| DRD4      | AC092118.2 | 0.407689217 | 5.32E-23 | postive |
| ALOX12    | AC092118.2 | 0.499568168 | 2.27E-35 | postive |
| PHKG2     | AC092118.2 | 0.56680021  | 3.92E-47 | postive |
| TAZ       | AC092118.2 | 0.690948474 | 1.05E-77 | postive |
| ENPP2     | AC104211.1 | 0.406307149 | 7.67E-23 | postive |
| SLC1A4    | AC104211.1 | 0.486690371 | 2.11E-33 | postive |
| MAPK3     | AC104211.1 | 0.414051296 | 9.68E-24 | postive |
| ZEB1      | AC104211.1 | 0.649310287 | 7.60E-66 | postive |
| MAPK8     | AC104211.1 | 0.480320508 | 1.85E-32 | postive |
| EPAS1     | AC104211.1 | 0.681923023 | 5.77E-75 | postive |
| MTOR      | AP000866.1 | 0.432048212 | 6.38E-26 | postive |
| ZNF419    | AP000866.1 | 0.471394123 | 3.60E-31 | postive |
| KLHL24    | AP000866.1 | 0.461927184 | 7.63E-30 | postive |
| TUBE1     | AP000866.1 | 0.440264774 | 5.82E-27 | postive |
| ALOX12    | AP000866.1 | 0.487188949 | 1.78E-33 | postive |
| IREB2     | AP000866.1 | 0.527896226 | 5.25E-40 | postive |
| GABPB1    | AP000866.1 | 0.449597249 | 3.54E-28 | postive |
| PIK3CA    | AP000866.1 | 0.430298139 | 1.05E-25 | postive |
| ULK2      | AP000866.1 | 0.440812242 | 4.95E-27 | postive |
| MAPK8     | AP000866.1 | 0.487549125 | 1.57E-33 | postive |
| LINC00472 | AP000866.1 | 0.426249908 | 3.33E-25 | postive |
| PRKAA1    | AP000866.1 | 0.405663376 | 9.09E-23 | postive |
| LPIN1     | AP000866.1 | 0.447113653 | 7.51E-28 | postive |
| ATM       | AP000866.1 | 0.548895247 | 9.77E-44 | postive |
| HELLS     | AL606534.1 | 0.559507972 | 1.00E-45 | postive |
| ZNF419    | AL606534.1 | 0.453337721 | 1.12E-28 | postive |
| TUBE1     | AL606534.1 | 0.589754309 | 8.39E-52 | postive |
| ALOX12    | AL606534.1 | 0.543903711 | 7.95E-43 | postive |
| GABPB1    | AL606534.1 | 0.566901815 | 3.75E-47 | postive |
| ATM       | AL606534.1 | 0.653895834 | 4.64E-67 | postive |
| FBXW7     | AL606534.1 | 0.547085566 | 2.10E-43 | postive |
| HELLS     | AC007038.1 | 0.611459778 | 1.42E-56 | postive |
| ZNF419    | AC007038.1 | 0.521330405 | 6.83E-39 | postive |

|           |            |              |           |          |
|-----------|------------|--------------|-----------|----------|
| TUBE1     | AC007038.1 | 0.599381148  | 7.11E-54  | postive  |
| ALOX12    | AC007038.1 | 0.635181418  | 3.11E-62  | postive  |
| GABPB1    | AC007038.1 | 0.560409142  | 6.75E-46  | postive  |
| LINC00472 | AC007038.1 | 0.506600376  | 1.76E-36  | postive  |
| ATM       | AC007038.1 | 0.591218647  | 4.11E-52  | postive  |
| TAZ       | AC007038.1 | 0.450829756  | 2.43E-28  | postive  |
| FBXW7     | AC007038.1 | 0.550701183  | 4.53E-44  | postive  |
| HELLS     | AC006064.2 | 0.528179767  | 4.70E-40  | postive  |
| KLHL24    | AC006064.2 | 0.435622384  | 2.27E-26  | postive  |
| TUBE1     | AC006064.2 | 0.44431581   | 1.74E-27  | postive  |
| IREB2     | AC006064.2 | 0.426184991  | 3.39E-25  | postive  |
| GABPB1    | AC006064.2 | 0.572475844  | 2.97E-48  | postive  |
| PIK3CA    | AC006064.2 | 0.418796349  | 2.65E-24  | postive  |
| KRAS      | AC006064.2 | 0.402553327  | 2.05E-22  | postive  |
| MAPK8     | AC006064.2 | 0.429759125  | 1.23E-25  | postive  |
| LINC00472 | AC006064.2 | 0.817155539  | 1.38E-130 | postive  |
| ATM       | AC006064.2 | 0.643730605  | 2.14E-64  | postive  |
| FBXW7     | AC006064.2 | 0.42907428   | 1.49E-25  | postive  |
| PEBP1     | SMIM2-AS1  | 0.418608686  | 2.79E-24  | postive  |
| MTOR      | AC024075.1 | 0.510372111  | 4.36E-37  | postive  |
| ZNF419    | AC024075.1 | 0.492109778  | 3.21E-34  | postive  |
| KLHL24    | AC024075.1 | 0.528759019  | 3.73E-40  | postive  |
| TUBE1     | AC024075.1 | 0.450509914  | 2.68E-28  | postive  |
| SETD1B    | AC024075.1 | 0.503821287  | 4.88E-36  | postive  |
| MAP3K5    | AC024075.1 | 0.429534047  | 1.31E-25  | postive  |
| ALOX12    | AC024075.1 | 0.480495944  | 1.75E-32  | postive  |
| IREB2     | AC024075.1 | 0.582862217  | 2.32E-50  | postive  |
| GABPB1    | AC024075.1 | 0.453167368  | 1.18E-28  | postive  |
| PRDX1     | AC024075.1 | -0.407212836 | 6.04E-23  | negative |
| PIK3CA    | AC024075.1 | 0.46829722   | 9.89E-31  | postive  |
| MAPK8     | AC024075.1 | 0.48616599   | 2.53E-33  | postive  |
| LINC00472 | AC024075.1 | 0.57553158   | 7.26E-49  | postive  |
| PRKAA1    | AC024075.1 | 0.411500959  | 1.93E-23  | postive  |
| LPIN1     | AC024075.1 | 0.474943891  | 1.12E-31  | postive  |
| ATM       | AC024075.1 | 0.627186352  | 2.85E-60  | postive  |
| FBXW7     | AC024075.1 | 0.419525211  | 2.17E-24  | postive  |
| HELLS     | AL445248.1 | 0.519636078  | 1.31E-38  | postive  |
| TUBE1     | AL445248.1 | 0.414915229  | 7.66E-24  | postive  |
| ALOX12    | AL445248.1 | 0.438187976  | 1.07E-26  | postive  |
| GABPB1    | AL445248.1 | 0.543294714  | 1.02E-42  | postive  |
| LINC00472 | AL445248.1 | 0.682161277  | 4.90E-75  | postive  |
| ATM       | AL445248.1 | 0.651965613  | 1.51E-66  | postive  |
| FBXW7     | AL445248.1 | 0.495821494  | 8.67E-35  | postive  |
| JDP2      | AL161421.1 | 0.45000087   | 3.13E-28  | postive  |
| HELLS     | SYNE1-AS1  | 0.451053049  | 2.27E-28  | postive  |
| ATM       | SYNE1-AS1  | 0.517222914  | 3.30E-38  | postive  |
| FBXW7     | SYNE1-AS1  | 0.431355277  | 7.79E-26  | postive  |
| ALOX12    | CYP4A22-AS | 0.412404526  | 1.51E-23  | postive  |
| JDP2      | LINC02154  | 0.583354164  | 1.83E-50  | postive  |
| RGS4      | LINC02154  | 0.468561793  | 9.07E-31  | postive  |
| EIF2S1    | LINC02154  | 0.47297607   | 2.14E-31  | postive  |
| SLC1A5    | LINC02154  | 0.422207826  | 1.03E-24  | postive  |
| VEGFA     | STPG3-AS1  | 0.441717021  | 3.78E-27  | postive  |
| HELLS     | AC008770.3 | 0.512195432  | 2.21E-37  | postive  |
| MTOR      | AC008770.3 | 0.418800219  | 2.65E-24  | postive  |
| ZNF419    | AC008770.3 | 0.508709422  | 8.09E-37  | postive  |
| KLHL24    | AC008770.3 | 0.528243567  | 4.58E-40  | postive  |
| TUBE1     | AC008770.3 | 0.552097688  | 2.50E-44  | postive  |

|           |            |             |           |         |
|-----------|------------|-------------|-----------|---------|
| ALOX12    | AC008770.3 | 0.546929698 | 2.24E-43  | postive |
| IREB2     | AC008770.3 | 0.525567254 | 1.31E-39  | postive |
| GABPB1    | AC008770.3 | 0.610494668 | 2.35E-56  | postive |
| PIK3CA    | AC008770.3 | 0.482747649 | 8.15E-33  | postive |
| ATG7      | AC008770.3 | 0.428706431 | 1.66E-25  | postive |
| MAPK8     | AC008770.3 | 0.530697145 | 1.73E-40  | postive |
| LINC00472 | AC008770.3 | 0.792265147 | 2.67E-117 | postive |
| PRKAA1    | AC008770.3 | 0.403912678 | 1.44E-22  | postive |
| LPIN1     | AC008770.3 | 0.425447298 | 4.17E-25  | postive |
| ATM       | AC008770.3 | 0.754961039 | 1.79E-100 | postive |
| FBXW7     | AC008770.3 | 0.545517209 | 4.05E-43  | postive |
| TUBE1     | AL645933.2 | 0.443360301 | 2.32E-27  | postive |
| ALOX12    | AL645933.2 | 0.481961949 | 1.06E-32  | postive |
| HELLS     | AC018809.1 | 0.417875128 | 3.42E-24  | postive |
| ZNF419    | AC018809.1 | 0.555482684 | 5.81E-45  | postive |
| TUBE1     | AC018809.1 | 0.551580722 | 3.12E-44  | postive |
| ALOX12    | AC018809.1 | 0.51774094  | 2.71E-38  | postive |
| GABPB1    | AC018809.1 | 0.440355587 | 5.66E-27  | postive |
| PHKG2     | AC018809.1 | 0.496163145 | 7.68E-35  | postive |
| LINC00472 | AC018809.1 | 0.487465844 | 1.62E-33  | postive |
| ATM       | AC018809.1 | 0.441389891 | 4.17E-27  | postive |
| TAZ       | AC018809.1 | 0.584474193 | 1.07E-50  | postive |
| FBXW7     | AC018809.1 | 0.443424415 | 2.28E-27  | postive |
| TUBE1     | TNS1-AS1   | 0.422694645 | 9.02E-25  | postive |
| ATM       | AC079766.1 | 0.412015936 | 1.68E-23  | postive |
| TFAP2C    | AC068888.2 | 0.54382326  | 8.22E-43  | postive |
| HBA1      | AC068888.2 | 0.504570629 | 3.71E-36  | postive |
| DUOX1     | AC068888.2 | 0.445371517 | 1.27E-27  | postive |
| CHMP6     | AC073508.3 | 0.428606047 | 1.71E-25  | postive |
| KLHL24    | ATP1A1-AS1 | 0.411348687 | 2.01E-23  | postive |
| TUBE1     | ATP1A1-AS1 | 0.4753196   | 9.88E-32  | postive |
| ALOX12    | ATP1A1-AS1 | 0.515938886 | 5.38E-38  | postive |
| IREB2     | ATP1A1-AS1 | 0.485722226 | 2.95E-33  | postive |
| GABPB1    | ATP1A1-AS1 | 0.445140742 | 1.36E-27  | postive |
| MAPK8     | ATP1A1-AS1 | 0.551195377 | 3.67E-44  | postive |
| LINC00472 | ATP1A1-AS1 | 0.583163712 | 2.01E-50  | postive |
| PRKAA2    | ATP1A1-AS1 | 0.478549702 | 3.36E-32  | postive |
| ATM       | ATP1A1-AS1 | 0.649035828 | 8.97E-66  | postive |
| TFAP2C    | AC112491.1 | 0.541366054 | 2.28E-42  | postive |
| HBA1      | AC112491.1 | 0.562754321 | 2.39E-46  | postive |
| HELLS     | AC139887.2 | 0.483631722 | 6.03E-33  | postive |
| MTOR      | AC139887.2 | 0.403102177 | 1.78E-22  | postive |
| ZNF419    | AC139887.2 | 0.520012503 | 1.13E-38  | postive |
| TUBE1     | AC139887.2 | 0.553676103 | 1.27E-44  | postive |
| SETD1B    | AC139887.2 | 0.452017051 | 1.69E-28  | postive |
| ALOX12    | AC139887.2 | 0.674732056 | 7.46E-73  | postive |
| GABPB1    | AC139887.2 | 0.540385392 | 3.41E-42  | postive |
| MAPK8     | AC139887.2 | 0.429070841 | 1.50E-25  | postive |
| LINC00472 | AC139887.2 | 0.524576342 | 1.93E-39  | postive |
| ATM       | AC139887.2 | 0.705756326 | 2.02E-82  | postive |
| FBXW7     | AC139887.2 | 0.507368214 | 1.33E-36  | postive |
| HELLS     | AP000873.1 | 0.522435211 | 4.45E-39  | postive |
| ZNF419    | AP000873.1 | 0.51820271  | 2.27E-38  | postive |
| TUBE1     | AP000873.1 | 0.651230668 | 2.37E-66  | postive |
| ALOX12    | AP000873.1 | 0.67288861  | 2.54E-72  | postive |
| GABPB1    | AP000873.1 | 0.583625543 | 1.61E-50  | postive |
| MAPK8     | AP000873.1 | 0.430777584 | 9.19E-26  | postive |
| LINC00472 | AP000873.1 | 0.649049194 | 8.90E-66  | postive |

|           |            |             |           |         |
|-----------|------------|-------------|-----------|---------|
| ATM       | AP000873.1 | 0.775727093 | 1.94E-109 | postive |
| FBXW7     | AP000873.1 | 0.508126366 | 1.00E-36  | postive |
| MAPK1     | AC073346.1 | 0.42722359  | 2.53E-25  | postive |
| HELLS     | AL355075.2 | 0.471618005 | 3.35E-31  | postive |
| ZNF419    | AL355075.2 | 0.577511635 | 2.89E-49  | postive |
| VEGFA     | AL355075.2 | 0.446231634 | 9.81E-28  | postive |
| TUBE1     | AL355075.2 | 0.626196646 | 4.94E-60  | postive |
| SETD1B    | AL355075.2 | 0.48353106  | 6.24E-33  | postive |
| ALOX12    | AL355075.2 | 0.698112748 | 5.97E-80  | postive |
| GABPB1    | AL355075.2 | 0.592836372 | 1.85E-52  | postive |
| MAPK8     | AL355075.2 | 0.470545698 | 4.76E-31  | postive |
| LINC00472 | AL355075.2 | 0.610493556 | 2.35E-56  | postive |
| ATM       | AL355075.2 | 0.703359916 | 1.23E-81  | postive |
| FBXW7     | AL355075.2 | 0.501164814 | 1.28E-35  | postive |
| HELLS     | AC073912.2 | 0.468296849 | 9.89E-31  | postive |
| TUBE1     | AC073912.2 | 0.494669597 | 1.30E-34  | postive |
| ALOX12    | AC073912.2 | 0.586551228 | 3.96E-51  | postive |
| GABPB1    | AC073912.2 | 0.497342852 | 5.05E-35  | postive |
| LINC00472 | AC073912.2 | 0.400979731 | 3.09E-22  | postive |
| ATM       | AC073912.2 | 0.686664325 | 2.16E-76  | postive |
| FBXW7     | AC073912.2 | 0.461634576 | 8.37E-30  | postive |
| ATG4D     | MIR200CHG  | 0.416722051 | 4.68E-24  | postive |
| GABARAPL2 | MIR200CHG  | 0.570973808 | 5.91E-48  | postive |
| HIF1A     | LINC02693  | 0.466608152 | 1.71E-30  | postive |
| ANGPTL7   | LINC02693  | 0.411642296 | 1.85E-23  | postive |
| AURKA     | LINC02693  | 0.410917833 | 2.25E-23  | postive |
| BRD4      | MMP25-AS1  | 0.426390999 | 3.20E-25  | postive |
| ZNF419    | MMP25-AS1  | 0.400037196 | 3.94E-22  | postive |
| VEGFA     | MMP25-AS1  | 0.427563061 | 2.30E-25  | postive |
| TUBE1     | MMP25-AS1  | 0.449865758 | 3.26E-28  | postive |
| SETD1B    | MMP25-AS1  | 0.485741138 | 2.93E-33  | postive |
| DRD4      | MMP25-AS1  | 0.468537451 | 9.15E-31  | postive |
| ALOX12    | MMP25-AS1  | 0.596105057 | 3.67E-53  | postive |
| PHKG2     | MMP25-AS1  | 0.543082867 | 1.12E-42  | postive |
| YY1AP1    | MMP25-AS1  | 0.417101502 | 4.22E-24  | postive |
| TAZ       | MMP25-AS1  | 0.67235903  | 3.60E-72  | postive |
| FANCD2    | SNHG10     | 0.4616125   | 8.43E-30  | postive |
| ZNF419    | SNHG10     | 0.566129834 | 5.30E-47  | postive |
| TUBE1     | SNHG10     | 0.427184436 | 2.56E-25  | postive |
| ALOX12    | SNHG10     | 0.41498097  | 7.53E-24  | postive |
| GABPB1    | SNHG10     | 0.403755169 | 1.50E-22  | postive |
| PHKG2     | SNHG10     | 0.477364895 | 5.00E-32  | postive |
| TAZ       | SNHG10     | 0.656354173 | 1.02E-67  | postive |
| TUBE1     | AC093915.1 | 0.464838648 | 3.01E-30  | postive |
| ALOX12    | AC093915.1 | 0.519907436 | 1.18E-38  | postive |
| TAZ       | AC093915.1 | 0.498094893 | 3.86E-35  | postive |
| SLC7A5    | AC061992.2 | 0.403178041 | 1.74E-22  | postive |
| TRIB3     | AC061992.2 | 0.400079213 | 3.90E-22  | postive |
| SLC2A6    | AC061992.2 | 0.400216265 | 3.76E-22  | postive |
| G6PD      | AC061992.2 | 0.471505014 | 3.48E-31  | postive |
| KLHL24    | Z82243.1   | 0.550396102 | 5.16E-44  | postive |
| IREB2     | Z82243.1   | 0.422425784 | 9.72E-25  | postive |
| GABPB1    | Z82243.1   | 0.516038365 | 5.18E-38  | postive |
| PIK3CA    | Z82243.1   | 0.448574715 | 4.83E-28  | postive |
| KRAS      | Z82243.1   | 0.412672075 | 1.41E-23  | postive |
| LINC00472 | Z82243.1   | 0.939935493 | 7.82E-253 | postive |
| LPIN1     | Z82243.1   | 0.438452862 | 9.92E-27  | postive |
| ATM       | Z82243.1   | 0.532099208 | 9.88E-41  | postive |



|           |            |             |           |         |
|-----------|------------|-------------|-----------|---------|
| VEGFA     | AC018730.1 | 0.558381928 | 1.64E-45  | postive |
| ALOX12    | AC018730.1 | 0.450009796 | 3.12E-28  | postive |
| SP1       | AC018730.1 | 0.401511253 | 2.69E-22  | postive |
| YY1AP1    | AC018730.1 | 0.469539066 | 6.60E-31  | postive |
| KLHL24    | ARAP1-AS2  | 0.610051599 | 2.96E-56  | postive |
| IREB2     | ARAP1-AS2  | 0.469378262 | 6.96E-31  | postive |
| GABPB1    | ARAP1-AS2  | 0.518006772 | 2.45E-38  | postive |
| PIK3CA    | ARAP1-AS2  | 0.514691055 | 8.63E-38  | postive |
| KRAS      | ARAP1-AS2  | 0.419512181 | 2.18E-24  | postive |
| MAPK8     | ARAP1-AS2  | 0.402955598 | 1.85E-22  | postive |
| LINC00472 | ARAP1-AS2  | 0.943165554 | 4.37E-259 | postive |
| LPIN1     | ARAP1-AS2  | 0.439916447 | 6.45E-27  | postive |
| ATM       | ARAP1-AS2  | 0.603356567 | 9.46E-55  | postive |
| FBXW7     | ARAP1-AS2  | 0.417193083 | 4.12E-24  | postive |
| HELLS     | LINC02614  | 0.554252081 | 9.89E-45  | postive |
| ZNF419    | LINC02614  | 0.463657908 | 4.40E-30  | postive |
| TUBE1     | LINC02614  | 0.601251601 | 2.76E-54  | postive |
| ALOX12    | LINC02614  | 0.629034696 | 1.01E-60  | postive |
| GABPB1    | LINC02614  | 0.535190692 | 2.85E-41  | postive |
| LINC00472 | LINC02614  | 0.536949644 | 1.39E-41  | postive |
| ATM       | LINC02614  | 0.66137099  | 4.38E-69  | postive |
| FBXW7     | LINC02614  | 0.468996985 | 7.88E-31  | postive |
| BRD4      | AC027796.4 | 0.464570367 | 3.29E-30  | postive |
| ZNF419    | AC027796.4 | 0.43835553  | 1.02E-26  | postive |
| DRD4      | AC027796.4 | 0.407300541 | 5.90E-23  | postive |
| ALOX12    | AC027796.4 | 0.480057398 | 2.03E-32  | postive |
| PHKG2     | AC027796.4 | 0.657883712 | 3.92E-68  | postive |
| TAZ       | AC027796.4 | 0.704689974 | 4.51E-82  | postive |
| HELLS     | AC087683.2 | 0.443099223 | 2.51E-27  | postive |
| KLHL24    | AC087683.2 | 0.545945662 | 3.39E-43  | postive |
| IREB2     | AC087683.2 | 0.41475652  | 8.00E-24  | postive |
| GABPB1    | AC087683.2 | 0.552616886 | 2.00E-44  | postive |
| PIK3CA    | AC087683.2 | 0.459659588 | 1.56E-29  | postive |
| MAPK8     | AC087683.2 | 0.402566183 | 2.04E-22  | postive |
| LINC00472 | AC087683.2 | 0.906336739 | 4.78E-203 | postive |
| ATM       | AC087683.2 | 0.581407729 | 4.62E-50  | postive |
| FBXW7     | AC087683.2 | 0.425712474 | 3.87E-25  | postive |
| HELLS     | AL807757.2 | 0.481585856 | 1.21E-32  | postive |
| ALOX12    | AL807757.2 | 0.421934924 | 1.11E-24  | postive |
| TFAP2C    | AL807757.2 | 0.422063221 | 1.07E-24  | postive |
| GABPB1    | AL807757.2 | 0.432814131 | 5.12E-26  | postive |
| DUOX1     | AL807757.2 | 0.4114285   | 1.96E-23  | postive |
| LINC00472 | AL807757.2 | 0.530747105 | 1.70E-40  | postive |
| TUBE1     | BDNF-AS    | 0.464641328 | 3.21E-30  | postive |
| MAPK8     | BDNF-AS    | 0.402630421 | 2.01E-22  | postive |
| HELLS     | TPT1-AS1   | 0.475660666 | 8.82E-32  | postive |
| BRD4      | TPT1-AS1   | 0.416217755 | 5.38E-24  | postive |
| ZNF419    | TPT1-AS1   | 0.534615953 | 3.59E-41  | postive |
| VEGFA     | TPT1-AS1   | 0.421641235 | 1.21E-24  | postive |
| TUBE1     | TPT1-AS1   | 0.587650046 | 2.33E-51  | postive |
| ALOX12    | TPT1-AS1   | 0.70271275  | 1.99E-81  | postive |
| GABPB1    | TPT1-AS1   | 0.455907865 | 5.06E-29  | postive |
| ATM       | TPT1-AS1   | 0.447757988 | 6.18E-28  | postive |
| TAZ       | TPT1-AS1   | 0.471365933 | 3.64E-31  | postive |
| FBXW7     | TPT1-AS1   | 0.420187009 | 1.81E-24  | postive |
| ZNF419    | AC079807.1 | 0.483571257 | 6.16E-33  | postive |
| TUBE1     | AC079807.1 | 0.456316906 | 4.46E-29  | postive |
| SETD1B    | AC079807.1 | 0.474407943 | 1.34E-31  | postive |

|           |            |              |           |          |
|-----------|------------|--------------|-----------|----------|
| ALOX12    | AC079807.1 | 0.595394989  | 5.23E-53  | postive  |
| TAZ       | AC079807.1 | 0.432626231  | 5.40E-26  | postive  |
| HELLS     | AC003101.2 | 0.477371924  | 4.99E-32  | postive  |
| ALOX12    | AC003101.2 | 0.440636309  | 5.21E-27  | postive  |
| TAZ       | AC003101.2 | 0.449149516  | 4.05E-28  | postive  |
| FBXW7     | AC003101.2 | 0.463659568  | 4.40E-30  | postive  |
| HELLS     | AP002490.1 | 0.472634411  | 2.40E-31  | postive  |
| ZNF419    | AP002490.1 | 0.545113753  | 4.80E-43  | postive  |
| VEGFA     | AP002490.1 | 0.405806072  | 8.75E-23  | postive  |
| TUBE1     | AP002490.1 | 0.651708372  | 1.77E-66  | postive  |
| SETD1B    | AP002490.1 | 0.435861437  | 2.12E-26  | postive  |
| ALOX12    | AP002490.1 | 0.682055021  | 5.27E-75  | postive  |
| GABPB1    | AP002490.1 | 0.513738986  | 1.24E-37  | postive  |
| LINC00472 | AP002490.1 | 0.563709458  | 1.57E-46  | postive  |
| ATM       | AP002490.1 | 0.573942024  | 1.51E-48  | postive  |
| TAZ       | AP002490.1 | 0.426845013  | 2.81E-25  | postive  |
| FBXW7     | AP002490.1 | 0.515109551  | 7.37E-38  | postive  |
| OTUB1     | AP002748.4 | 0.453089853  | 1.21E-28  | postive  |
| TFAP2C    | AC231981.1 | 0.407396715  | 5.75E-23  | postive  |
| HELLS     | AC008771.1 | 0.43674371   | 1.64E-26  | postive  |
| STMN1     | LINC02195  | 0.482101381  | 1.01E-32  | postive  |
| RRM2      | LINC02195  | 0.458695659  | 2.12E-29  | postive  |
| AURKA     | LINC02195  | 0.418481646  | 2.89E-24  | postive  |
| CDKN2A    | LINC02195  | 0.426271001  | 3.31E-25  | postive  |
| IFNG      | LINC02195  | 0.426788294  | 2.86E-25  | postive  |
| PML       | NNT-AS1    | -0.458377323 | 2.34E-29  | negative |
| FH        | NNT-AS1    | 0.418669113  | 2.75E-24  | postive  |
| ISCU      | NNT-AS1    | 0.529007907  | 3.38E-40  | postive  |
| ACSL3     | NNT-AS1    | 0.476704333  | 6.23E-32  | postive  |
| KLHL24    | NNT-AS1    | 0.636032085  | 1.91E-62  | postive  |
| SLC2A12   | NNT-AS1    | 0.427797658  | 2.15E-25  | postive  |
| IREB2     | NNT-AS1    | 0.480125383  | 1.98E-32  | postive  |
| CS        | NNT-AS1    | 0.408421266  | 4.38E-23  | postive  |
| PIK3CA    | NNT-AS1    | 0.409360088  | 3.41E-23  | postive  |
| KRAS      | NNT-AS1    | 0.404857633  | 1.12E-22  | postive  |
| GOT1      | NNT-AS1    | 0.496656867  | 6.44E-35  | postive  |
| GABARAPL2 | NNT-AS1    | 0.427893273  | 2.09E-25  | postive  |
| GABARAPL1 | NNT-AS1    | 0.594130203  | 9.79E-53  | postive  |
| WIP1      | NNT-AS1    | 0.422922516  | 8.46E-25  | postive  |
| LINC00472 | NNT-AS1    | 0.416493321  | 4.99E-24  | postive  |
| PRKAA2    | NNT-AS1    | 0.400809449  | 3.23E-22  | postive  |
| PRKAA1    | NNT-AS1    | 0.456478979  | 4.24E-29  | postive  |
| LPIN1     | NNT-AS1    | 0.545101125  | 4.82E-43  | postive  |
| TAZ       | AC112484.3 | 0.425676155  | 3.91E-25  | postive  |
| HELLS     | LINC00216  | 0.465847374  | 2.18E-30  | postive  |
| KLHL24    | LINC00216  | 0.505413878  | 2.72E-36  | postive  |
| TUBE1     | LINC00216  | 0.413309755  | 1.18E-23  | postive  |
| IREB2     | LINC00216  | 0.446452548  | 9.17E-28  | postive  |
| GABPB1    | LINC00216  | 0.560907189  | 5.42E-46  | postive  |
| PIK3CA    | LINC00216  | 0.468238928  | 1.01E-30  | postive  |
| ATG7      | LINC00216  | 0.404700312  | 1.17E-22  | postive  |
| MAPK8     | LINC00216  | 0.432573836  | 5.49E-26  | postive  |
| LINC00472 | LINC00216  | 0.891818038  | 3.97E-187 | postive  |
| ATM       | LINC00216  | 0.667323777  | 9.70E-71  | postive  |
| FBXW7     | LINC00216  | 0.44342001   | 2.28E-27  | postive  |
| ZNF419    | AL158835.2 | 0.492347757  | 2.96E-34  | postive  |
| VEGFA     | AL158835.2 | 0.42024602   | 1.78E-24  | postive  |
| TUBE1     | AL158835.2 | 0.517264441  | 3.25E-38  | postive  |

|        |            |              |          |          |
|--------|------------|--------------|----------|----------|
| SETD1B | AL158835.2 | 0.505897525  | 2.28E-36 | postive  |
| ALOX12 | AL158835.2 | 0.640685752  | 1.28E-63 | postive  |
| GABPB1 | AL158835.2 | 0.449452836  | 3.69E-28 | postive  |
| ATM    | AL158835.2 | 0.562196524  | 3.07E-46 | postive  |
| FBXW7  | AL158835.2 | 0.410709235  | 2.38E-23 | postive  |
| FANCD2 | LINC01711  | 0.47633762   | 7.04E-32 | postive  |
| STMN1  | LINC01711  | 0.577014739  | 3.64E-49 | postive  |
| RRM2   | LINC01711  | 0.553846351  | 1.18E-44 | postive  |
| AURKA  | LINC01711  | 0.569450876  | 1.18E-47 | postive  |
| SLC1A5 | LINC01711  | 0.400288226  | 3.69E-22 | postive  |
| CDKN2A | LINC01711  | 0.693444205  | 1.77E-78 | postive  |
| ZNF419 | AL161452.1 | 0.464811889  | 3.04E-30 | postive  |
| TUBE1  | AL161452.1 | 0.411894088  | 1.73E-23 | postive  |
| DRD4   | AL161452.1 | 0.417811729  | 3.48E-24 | postive  |
| ALOX12 | AL161452.1 | 0.432742187  | 5.23E-26 | postive  |
| NCOA4  | AL161452.1 | -0.417771941 | 3.51E-24 | negative |
| PHKG2  | AL161452.1 | 0.539832086  | 4.29E-42 | postive  |
| TAZ    | AL161452.1 | 0.677931404  | 8.72E-74 | postive  |
| MTOR   | AP000759.1 | 0.439969159  | 6.35E-27 | postive  |
| HELLS  | NCBP2-AS1  | 0.516489555  | 4.36E-38 | postive  |
| ZNF419 | NCBP2-AS1  | 0.528467762  | 4.19E-40 | postive  |
| TUBE1  | NCBP2-AS1  | 0.508608649  | 8.40E-37 | postive  |
| SETD1B | NCBP2-AS1  | 0.401950296  | 2.40E-22 | postive  |
| ALOX12 | NCBP2-AS1  | 0.610399147  | 2.47E-56 | postive  |
| GABPB1 | NCBP2-AS1  | 0.444042426  | 1.89E-27 | postive  |
| ATM    | NCBP2-AS1  | 0.578632318  | 1.71E-49 | postive  |
| FBXW7  | NCBP2-AS1  | 0.461657379  | 8.31E-30 | postive  |

**Table S5 Univariate and Multivariate COX analysis**

**Univariate COX analysis**

| <b>LncRNA</b>             | <b>HR</b>   | <b>HR.95L</b> | <b>HR.95H</b> | <b>pvalue</b> |
|---------------------------|-------------|---------------|---------------|---------------|
| PARD3-AS1                 | 1.156956574 | 1.063441358   | 1.258695183   | 0.000698004   |
| OGFR-AS1                  | 2.415704743 | 1.67304976    | 3.488019033   | 2.53E-06      |
| AC010809.2                | 2.368570158 | 1.71047858    | 3.279856677   | 2.08E-07      |
| AL031714.1                | 1.482713979 | 1.210272869   | 1.816483538   | 0.000143346   |
| AC110285.2                | 1.108080459 | 1.0470459     | 1.172672853   | 0.000384735   |
| AL031600.1                | 1.345829865 | 1.156102738   | 1.566692966   | 0.00012767    |
| AC017104.1                | 2.06657381  | 1.555284591   | 2.745945878   | 5.57E-07      |
| AC010883.1                | 1.226150901 | 1.121249613   | 1.340866489   | 7.90E-06      |
| AC093458.1                | 1.994361041 | 1.42530778    | 2.790608469   | 5.64E-05      |
| SNHG17                    | 1.148672693 | 1.100512498   | 1.198940455   | 2.26E-10      |
| LINC00941                 | 1.412990083 | 1.271104997   | 1.570712868   | 1.52E-10      |
| AC138150.2                | 1.578821056 | 1.266431178   | 1.968267972   | 4.91E-05      |
| RRN3P2                    | 2.242709163 | 1.640591319   | 3.065811902   | 4.11E-07      |
| AC107081.1                | 1.421554461 | 1.17576052    | 1.718731877   | 0.000281603   |
| AC087239.1                | 1.56677586  | 1.302629408   | 1.88448578    | 1.87E-06      |
| AL121782.1                | 3.038852329 | 2.129196236   | 4.337140617   | 9.14E-10      |
| LINC01929                 | 1.131305621 | 1.05606255    | 1.211909662   | 0.000442513   |
| AL442125.1                | 4.891377394 | 2.701614413   | 8.85602797    | 1.59E-07      |
| AL513320.1                | 1.274759117 | 1.135785864   | 1.430736952   | 3.76E-05      |
| OCIAD1-AS1                | 1.68650032  | 1.400533729   | 2.030856716   | 3.52E-08      |
| AC068722.2                | 1.992814017 | 1.475863044   | 2.690837556   | 6.78E-06      |
| AL021707.8                | 1.225599089 | 1.108384081   | 1.355209942   | 7.30E-05      |
| AL031705.1                | 3.288222284 | 1.844600613   | 5.861651411   | 5.44E-05      |
| ARHGAP27P1-BPTFP1-KPNA2P3 | 1.277056728 | 1.135757898   | 1.435934444   | 4.36E-05      |
| AL008582.1                | 1.260571594 | 1.10897226    | 1.432894943   | 0.000396899   |
| AC025171.5                | 2.150782225 | 1.629919243   | 2.838094095   | 6.20E-08      |
| AC232271.1                | 1.437979157 | 1.248345356   | 1.656419873   | 4.80E-07      |
| LINC00894                 | 1.922977853 | 1.556325904   | 2.376008659   | 1.38E-09      |
| AL451050.2                | 4.2150234   | 2.722786866   | 6.525087396   | 1.10E-10      |
| AC006017.1                | 1.457901005 | 1.167259103   | 1.820911344   | 0.00088957    |
| APP-DT                    | 0.216842711 | 0.10735836    | 0.437979506   | 2.03E-05      |
| AC116407.2                | 1.30193312  | 1.171928061   | 1.446359982   | 8.84E-07      |
| HM13-IT1                  | 1.32233038  | 1.18552129    | 1.474927232   | 5.33E-07      |
| AC012615.6                | 1.477457582 | 1.226045333   | 1.780424302   | 4.11E-05      |
| AL096865.1                | 1.741478126 | 1.431304994   | 2.118867799   | 2.97E-08      |
| AC108134.3                | 1.251636633 | 1.1247838     | 1.392795898   | 3.84E-05      |
| LINC00115                 | 1.612913155 | 1.330621913   | 1.955092443   | 1.12E-06      |
| AC011462.4                | 1.205178398 | 1.12659907    | 1.289238567   | 5.79E-08      |
| AC025766.1                | 1.492889517 | 1.177182437   | 1.893265683   | 0.000947625   |
| AC093281.2                | 1.439140751 | 1.17282026    | 1.765936496   | 0.000488868   |
| AC147067.1                | 1.285095108 | 1.137941554   | 1.451277907   | 5.29E-05      |
| AC008750.1                | 1.893700001 | 1.412024143   | 2.539687238   | 2.01E-05      |
| Z98200.1                  | 4.738416932 | 2.846472832   | 7.88786556    | 2.19E-09      |
| AC108673.2                | 1.744397808 | 1.339400458   | 2.271855063   | 3.66E-05      |
| AC012645.4                | 2.042529248 | 1.540373959   | 2.708385004   | 7.02E-07      |
| AC016737.1                | 2.3974779   | 1.761583966   | 3.262915871   | 2.69E-08      |
| AC006272.1                | 2.904129837 | 1.845915022   | 4.568991536   | 4.00E-06      |
| RUSC1-AS1                 | 1.301342547 | 1.155579711   | 1.465491655   | 1.39E-05      |
| CEP250-AS1                | 2.262699712 | 1.531781266   | 3.34238974    | 4.09E-05      |
| AL445222.1                | 1.793616429 | 1.435950034   | 2.24037036    | 2.62E-07      |
| RHOQ-AS1                  | 2.5861956   | 1.69826982    | 3.938365745   | 9.51E-06      |
| PIK3IP1-DT                | 1.287858302 | 1.119256004   | 1.481858484   | 0.000409822   |
| H1-10-AS1                 | 1.963934015 | 1.448187092   | 2.663355334   | 1.41E-05      |
| AC008610.1                | 1.139238643 | 1.082024884   | 1.199477668   | 7.10E-07      |

|                        |             |             |             |             |
|------------------------|-------------|-------------|-------------|-------------|
| AC078906.1             | 1.622045799 | 1.228785484 | 2.141165084 | 0.000639543 |
| AC084824.3             | 2.106790239 | 1.465681668 | 3.028328189 | 5.69E-05    |
| AC097641.2             | 2.633286061 | 1.883615496 | 3.681322167 | 1.48E-08    |
| AC083967.1             | 1.054081171 | 1.032344329 | 1.076275699 | 7.27E-07    |
| AC004816.1             | 1.105272456 | 1.041335226 | 1.173135387 | 0.00099404  |
| DTX2P1-UPK3BP1-PMS2P11 | 2.978394722 | 1.688285663 | 5.254344874 | 0.000164456 |
| AC018638.7             | 1.422333197 | 1.186901237 | 1.704465088 | 0.000135702 |
| HOTAIR                 | 1.393325833 | 1.221701568 | 1.589059822 | 7.59E-07    |
| AC100803.4             | 1.433108012 | 1.248316557 | 1.645254612 | 3.24E-07    |
| TMEM92-AS1             | 1.537634001 | 1.323072314 | 1.786991003 | 2.01E-08    |
| AC026401.3             | 1.225137804 | 1.168178135 | 1.284874793 | 6.30E-17    |
| MRPS9-AS1              | 2.533800466 | 1.69899598  | 3.778787518 | 5.14E-06    |
| AC008875.1             | 1.740443002 | 1.44509457  | 2.096154747 | 5.21E-09    |
| AC245884.8             | 1.178067842 | 1.094944753 | 1.267501247 | 1.14E-05    |
| AC015961.2             | 1.576684742 | 1.269845176 | 1.957667613 | 3.73E-05    |
| AP003352.1             | 1.325393576 | 1.194848447 | 1.470201628 | 1.01E-07    |
| AC006480.2             | 1.285676901 | 1.107206221 | 1.492915288 | 0.000982167 |
| AP001001.1             | 2.459722472 | 1.44831188  | 4.177439073 | 0.000866527 |
| SNHG15                 | 1.07369191  | 1.042821396 | 1.105476281 | 1.78E-06    |
| AC005332.5             | 1.363972273 | 1.199022018 | 1.551614844 | 2.36E-06    |
| AC110015.1             | 1.92618013  | 1.310377472 | 2.831374907 | 0.000852104 |
| HOXB-AS1               | 1.109197609 | 1.051212905 | 1.170380738 | 0.00015487  |
| AC048382.2             | 1.527609833 | 1.224791053 | 1.905297885 | 0.000170736 |
| AL021707.6             | 1.13116146  | 1.072778981 | 1.192721213 | 5.16E-06    |
| AL096701.3             | 2.976046932 | 2.005104166 | 4.417154726 | 6.20E-08    |
| AC131953.1             | 2.001539959 | 1.32427534  | 3.025173153 | 0.000992324 |
| AL158196.1             | 4.301302898 | 2.388316641 | 7.746546793 | 1.17E-06    |
| AC005261.3             | 1.226504909 | 1.157831747 | 1.299251204 | 3.79E-12    |
| AC099343.2             | 1.630343798 | 1.369728901 | 1.94054524  | 3.79E-08    |
| KLHDC7B-DT             | 1.082032754 | 1.039287883 | 1.126535679 | 0.000126148 |
| AC005253.1             | 1.464495177 | 1.174464043 | 1.826148817 | 0.000703811 |
| LINC02027              | 0.701884139 | 0.604232591 | 0.815317399 | 3.63E-06    |
| AC015912.3             | 1.389577615 | 1.249311585 | 1.545591966 | 1.36E-09    |
| AC000123.1             | 1.31441063  | 1.150103218 | 1.502191523 | 6.00E-05    |
| AC010201.2             | 1.280717079 | 1.112262469 | 1.474684513 | 0.000584583 |
| LINC02604              | 1.151767819 | 1.095000081 | 1.211478549 | 4.27E-08    |
| MATN1-AS1              | 1.613623477 | 1.247144789 | 2.087793451 | 0.000272428 |
| AC104564.3             | 1.359201927 | 1.169548436 | 1.579609551 | 6.27E-05    |
| AC135050.3             | 1.143089645 | 1.078693362 | 1.211330284 | 6.17E-06    |
| ACBD3-AS1              | 2.002601249 | 1.410194708 | 2.843870949 | 0.000104089 |
| AL928654.2             | 1.135986589 | 1.06175773  | 1.215404883 | 0.000217263 |
| AC026333.4             | 3.088547574 | 2.073571753 | 4.600335679 | 2.90E-08    |
| LINC01474              | 1.410425101 | 1.181126086 | 1.684239294 | 0.000145331 |
| AP000525.1             | 1.466127988 | 1.279346981 | 1.68017849  | 3.73E-08    |
| AC002553.1             | 1.315698252 | 1.159708976 | 1.492669217 | 2.03E-05    |
| LINC01355              | 1.422053961 | 1.273341294 | 1.588134679 | 4.17E-10    |
| AL355488.1             | 1.265730252 | 1.169864145 | 1.369452237 | 4.52E-09    |
| AC003070.1             | 1.238874308 | 1.100156226 | 1.395083275 | 0.00040718  |
| CR936218.1             | 1.295063059 | 1.113579338 | 1.506123784 | 0.000789301 |
| AP002907.1             | 1.82042794  | 1.405802803 | 2.357341925 | 5.55E-06    |
| AC005785.1             | 1.621108505 | 1.38417427  | 1.898599651 | 2.06E-09    |
| AC008906.1             | 1.374944566 | 1.154398946 | 1.637624988 | 0.000357583 |
| AC145098.1             | 1.365487342 | 1.15138319  | 1.619404987 | 0.00034366  |
| AC025171.4             | 1.18326355  | 1.100893044 | 1.271797144 | 4.86E-06    |
| MYG1-AS1               | 1.211720307 | 1.135855245 | 1.292652483 | 5.83E-09    |
| LINC02449              | 1.737618198 | 1.386113178 | 2.178261524 | 1.66E-06    |
| PCED1B-AS1             | 1.112958896 | 1.057784541 | 1.171011163 | 3.70E-05    |
| AL512652.1             | 3.825238681 | 2.44359683  | 5.988079041 | 4.42E-09    |

|               |             |             |             |             |
|---------------|-------------|-------------|-------------|-------------|
| Z84485.1      | 1.445311649 | 1.255917471 | 1.663266744 | 2.75E-07    |
| FSIP2-AS1     | 2.792968542 | 1.907576869 | 4.089310057 | 1.29E-07    |
| AC026356.2    | 1.455472056 | 1.280940027 | 1.653784613 | 8.46E-09    |
| AC084824.5    | 1.361516738 | 1.234304493 | 1.501839973 | 7.00E-10    |
| AL078604.2    | 1.421144763 | 1.230310804 | 1.641579046 | 1.78E-06    |
| AL158834.2    | 3.927543032 | 2.420950394 | 6.371710179 | 3.00E-08    |
| LINC01615     | 1.084437853 | 1.052826341 | 1.116998512 | 7.85E-08    |
| AP000240.1    | 1.418459985 | 1.262366601 | 1.593854532 | 4.18E-09    |
| AC048341.2    | 1.095579377 | 1.060200926 | 1.132138392 | 5.02E-08    |
| AC010999.1    | 4.018098112 | 2.204536914 | 7.323584529 | 5.60E-06    |
| AL590560.3    | 1.116457146 | 1.06944839  | 1.165532221 | 5.19E-07    |
| AC104758.1    | 2.044503665 | 1.532213022 | 2.728077088 | 1.18E-06    |
| AC093788.1    | 1.674856318 | 1.395256353 | 2.010486229 | 3.13E-08    |
| LINC02100     | 1.314661895 | 1.198713333 | 1.441825873 | 6.34E-09    |
| N4BP2L2-IT2   | 1.379798501 | 1.185556631 | 1.605865004 | 3.20E-05    |
| AL080317.1    | 1.400873652 | 1.16320907  | 1.687097393 | 0.000379732 |
| AC130650.2    | 3.159166574 | 2.0158721   | 4.95087632  | 5.21E-07    |
| AL159169.2    | 1.90498761  | 1.451014689 | 2.500993147 | 3.48E-06    |
| ASMTL-AS1     | 1.053376319 | 1.032095394 | 1.075096038 | 5.92E-07    |
| AC009690.2    | 2.252720494 | 1.571745011 | 3.22873595  | 9.77E-06    |
| ARHGEF2-AS2   | 3.124559372 | 2.313705844 | 4.219581887 | 1.07E-13    |
| SLBP-DT       | 1.712272477 | 1.493457819 | 1.963146866 | 1.26E-14    |
| AC092301.1    | 3.865882231 | 2.105773122 | 7.097177405 | 1.29E-05    |
| AC009120.2    | 1.269572062 | 1.154422909 | 1.396206891 | 8.65E-07    |
| PKD1P6-NPIPP1 | 3.224564261 | 2.017430864 | 5.153988104 | 9.93E-07    |
| AC069549.1    | 1.282978684 | 1.116433327 | 1.474368656 | 0.000443964 |
| AC012645.3    | 1.540816694 | 1.194441273 | 1.987637349 | 0.000876015 |
| AC005899.7    | 1.877418831 | 1.446957334 | 2.435940152 | 2.13E-06    |
| AC108463.3    | 1.56461913  | 1.208472134 | 2.025725669 | 0.000681608 |
| AC019257.1    | 1.066096436 | 1.03582114  | 1.097256626 | 1.33E-05    |
| AC117383.1    | 1.343943295 | 1.136080396 | 1.589837819 | 0.000564325 |
| AC107021.2    | 1.097956903 | 1.058600702 | 1.138776271 | 5.23E-07    |
| AC007497.1    | 1.98560913  | 1.425540591 | 2.765718242 | 4.97E-05    |
| AC103591.3    | 1.223685612 | 1.106162065 | 1.35369538  | 8.91E-05    |
| AL354836.1    | 1.050219079 | 1.029682184 | 1.071165581 | 1.16E-06    |
| AL133406.2    | 2.73352584  | 1.625533922 | 4.596744132 | 0.000149427 |
| ZMIZ1-AS1     | 2.160432035 | 1.674482156 | 2.787408968 | 3.12E-09    |
| AC124319.1    | 1.406302561 | 1.203005946 | 1.643954379 | 1.87E-05    |
| SNHG1         | 1.046239774 | 1.026240968 | 1.066628306 | 4.42E-06    |
| AC004253.1    | 1.519083073 | 1.270001306 | 1.817016543 | 4.74E-06    |
| AC093484.4    | 1.448808392 | 1.185649894 | 1.770375697 | 0.000288921 |
| AP003390.1    | 1.597707415 | 1.224864299 | 2.084042276 | 0.000548382 |
| AC010326.3    | 1.149250148 | 1.097633274 | 1.203294338 | 2.97E-09    |
| AL359881.1    | 1.209165132 | 1.098455749 | 1.331032514 | 0.000105897 |
| NFE4          | 1.018929036 | 1.008439978 | 1.029527193 | 0.00038246  |
| AC079848.1    | 0.252936501 | 0.120932355 | 0.529030246 | 0.000261083 |
| AC080013.2    | 1.75827315  | 1.449177147 | 2.133296453 | 1.06E-08    |
| AC004264.1    | 1.111666369 | 1.061908087 | 1.163756196 | 5.87E-06    |
| AC034213.1    | 1.529271819 | 1.311780484 | 1.782822907 | 5.72E-08    |
| LINC00271     | 0.095870771 | 0.031052918 | 0.295985224 | 4.57E-05    |
| LINC00926     | 1.63900376  | 1.374534466 | 1.954358651 | 3.73E-08    |
| AC068620.2    | 2.210021791 | 1.749486077 | 2.791789189 | 2.91E-11    |
| AC055822.1    | 1.170549534 | 1.067907963 | 1.283056461 | 0.00077059  |
| PRKAR1B-AS1   | 1.133065065 | 1.089567343 | 1.178299303 | 3.98E-10    |
| AC005387.2    | 1.880548339 | 1.450879503 | 2.437460898 | 1.82E-06    |
| AC132192.2    | 1.474463901 | 1.289929978 | 1.685396752 | 1.26E-08    |
| VPS9D1-AS1    | 1.50427298  | 1.328560423 | 1.703224904 | 1.17E-10    |
| AC027601.1    | 3.700455634 | 2.310875525 | 5.925620723 | 5.13E-08    |

|            |             |             |             |             |
|------------|-------------|-------------|-------------|-------------|
| AC069281.2 | 1.967797194 | 1.596706137 | 2.425133658 | 2.17E-10    |
| AP002807.1 | 1.479215576 | 1.314284074 | 1.664844583 | 8.53E-11    |
| DLEU2      | 1.626520215 | 1.25187649  | 2.113281967 | 0.000270779 |
| AC138932.4 | 1.917116073 | 1.486325983 | 2.472764442 | 5.39E-07    |
| AC092535.5 | 1.030179637 | 1.013722209 | 1.046904245 | 0.000296127 |
| AL133243.3 | 3.117719952 | 2.039438773 | 4.766104197 | 1.51E-07    |
| LINC02609  | 1.519002635 | 1.322477399 | 1.744732278 | 3.34E-09    |
| AC027271.1 | 2.779079011 | 2.117032978 | 3.648162419 | 1.81E-13    |
| AC084018.1 | 1.128722629 | 1.067239157 | 1.193748154 | 2.26E-05    |
| AC060766.3 | 1.133945562 | 1.052241106 | 1.221994208 | 0.000985594 |
| AL360181.2 | 1.159554125 | 1.083914109 | 1.240472614 | 1.70E-05    |
| AC027607.1 | 2.126093429 | 1.488606117 | 3.036581145 | 3.36E-05    |
| LMNTD2-AS1 | 1.051227812 | 1.029700074 | 1.073205626 | 2.22E-06    |
| MIR155HG   | 1.072420036 | 1.040915005 | 1.104878619 | 4.31E-06    |
| LINC01126  | 1.60401234  | 1.231083155 | 2.089912104 | 0.000465583 |
| AL139123.1 | 2.846621193 | 2.085951093 | 3.884679867 | 4.26E-11    |
| AC055855.1 | 1.685502968 | 1.255590549 | 2.262616787 | 0.00051095  |
| TFAP2E-AS1 | 2.016589895 | 1.448223877 | 2.808015299 | 3.29E-05    |
| AC233728.1 | 1.819916308 | 1.409794762 | 2.349345775 | 4.30E-06    |
| AL662797.1 | 3.662027128 | 2.454428568 | 5.463773876 | 2.04E-10    |
| AC010168.2 | 1.392502264 | 1.169689488 | 1.657758385 | 0.000197805 |
| AC129510.1 | 1.444260802 | 1.259344909 | 1.656328818 | 1.45E-07    |
| AC105105.3 | 1.669433418 | 1.333830262 | 2.089477211 | 7.62E-06    |
| ZEB2-AS1   | 2.334980783 | 1.501043088 | 3.632231015 | 0.000168802 |
| AC017083.1 | 2.80879795  | 1.850232659 | 4.263975065 | 1.24E-06    |
| AL162377.1 | 0.219401227 | 0.111888622 | 0.430221566 | 1.01E-05    |
| AC133644.1 | 1.031658933 | 1.014802252 | 1.048795617 | 0.000208828 |
| U47924.3   | 1.886858554 | 1.545136159 | 2.304156291 | 4.72E-10    |
| AC009133.1 | 1.151465146 | 1.061070679 | 1.249560474 | 0.000722082 |
| AC020558.2 | 1.81942752  | 1.443313435 | 2.293553444 | 4.07E-07    |
| AC008555.1 | 0.600285729 | 0.470577896 | 0.765745606 | 3.98E-05    |
| AC108673.3 | 1.131720693 | 1.082650259 | 1.183015213 | 4.47E-08    |
| LAMC1-AS1  | 1.65622475  | 1.258460126 | 2.17971183  | 0.000317617 |
| SCAT2      | 1.352270506 | 1.233009185 | 1.483067234 | 1.49E-10    |
| MED8-AS1   | 2.00339004  | 1.614705876 | 2.485636369 | 2.72E-10    |
| AL161935.1 | 2.417714174 | 1.536781175 | 3.803626646 | 0.000134249 |
| AL442128.2 | 4.59782458  | 2.50797313  | 8.429113781 | 8.09E-07    |
| AL683807.1 | 1.319846051 | 1.163566637 | 1.497115458 | 1.59E-05    |
| AL359881.2 | 1.825194213 | 1.333296618 | 2.498569239 | 0.000173134 |
| LINC01705  | 1.06453704  | 1.02962928  | 1.100628285 | 0.000236531 |
| LINC01871  | 1.1633795   | 1.093625483 | 1.237582593 | 1.61E-06    |
| AL031186.1 | 1.58787364  | 1.273270838 | 1.980209256 | 4.05E-05    |
| AC112220.2 | 0.468740313 | 0.32200974  | 0.682331786 | 7.64E-05    |
| LINC00460  | 1.115490976 | 1.081626355 | 1.150415864 | 3.69E-12    |
| AC021851.1 | 3.382482732 | 1.82819195  | 6.258199218 | 0.000103667 |
| NUP153-AS1 | 1.612031348 | 1.350798528 | 1.923784351 | 1.20E-07    |
| AC040162.3 | 2.447097099 | 1.732758044 | 3.455926366 | 3.75E-07    |
| AL645939.4 | 1.447559118 | 1.232625145 | 1.699971324 | 6.47E-06    |
| ZNF32-AS2  | 1.463770893 | 1.199560218 | 1.786175631 | 0.000175778 |
| LINC00893  | 1.418824986 | 1.215022365 | 1.656812582 | 9.79E-06    |
| KIF1C-AS1  | 2.09613758  | 1.652629964 | 2.658667003 | 1.05E-09    |
| AL021707.1 | 2.395229676 | 1.6070103   | 3.570061252 | 1.79E-05    |
| AC011374.2 | 1.299498556 | 1.156031026 | 1.460770912 | 1.14E-05    |
| AC007220.1 | 2.237723216 | 1.579769248 | 3.169706714 | 5.79E-06    |
| AGAP2-AS1  | 1.058117011 | 1.036451361 | 1.080235554 | 8.71E-08    |
| IGBP1-AS1  | 2.77712943  | 1.885008495 | 4.091465842 | 2.39E-07    |
| AC127024.5 | 1.325876198 | 1.165305756 | 1.508572049 | 1.85E-05    |
| AL162586.1 | 1.27238348  | 1.156396472 | 1.40000403  | 7.83E-07    |

|                  |             |             |             |             |
|------------------|-------------|-------------|-------------|-------------|
| AP000892.3       | 1.992464947 | 1.32388722  | 2.998681841 | 0.000949263 |
| AC015660.3       | 1.872162135 | 1.402072074 | 2.499865109 | 2.13E-05    |
| AC073655.2       | 1.61409679  | 1.323755748 | 1.968118705 | 2.22E-06    |
| AC010245.2       | 1.876481177 | 1.46183806  | 2.408735758 | 7.80E-07    |
| RASGRP3-AS1      | 1.703613668 | 1.443084571 | 2.011177714 | 3.15E-10    |
| AC008760.1       | 1.396266493 | 1.180274109 | 1.651785889 | 9.90E-05    |
| ZNNT1            | 1.189262894 | 1.112730633 | 1.27105895  | 3.27E-07    |
| LINC02446        | 1.125191244 | 1.072282931 | 1.180710146 | 1.59E-06    |
| IBA57-DT         | 1.666055966 | 1.238722837 | 2.240809971 | 0.000736305 |
| AC092119.2       | 1.781690478 | 1.474618447 | 2.152706665 | 2.17E-09    |
| AC004585.1       | 1.228589894 | 1.096009604 | 1.377207939 | 0.000410127 |
| LINC01801        | 0.474685423 | 0.325821059 | 0.691564419 | 0.000104097 |
| RAP2C-AS1        | 0.275917637 | 0.129441123 | 0.588148038 | 0.000854735 |
| APCDD1L-DT       | 1.112057867 | 1.076788976 | 1.148481946 | 1.05E-10    |
| AC007743.1       | 0.588647964 | 0.449673277 | 0.770573754 | 0.000114926 |
| AC018638.6       | 1.289788308 | 1.121446927 | 1.483399562 | 0.000362145 |
| UST-AS2          | 1.651811712 | 1.42748944  | 1.91138502  | 1.59E-11    |
| AL021154.1       | 1.524509172 | 1.196177151 | 1.942963227 | 0.00065559  |
| AC015813.1       | 1.199078069 | 1.110027645 | 1.29527244  | 4.00E-06    |
| AC068792.1       | 2.45614534  | 1.782719857 | 3.383958453 | 3.88E-08    |
| AL592211.1       | 2.762278704 | 1.808233643 | 4.219689014 | 2.60E-06    |
| AC010973.2       | 1.44946102  | 1.27427267  | 1.648734448 | 1.63E-08    |
| MELTF-AS1        | 1.164763394 | 1.121080832 | 1.210148033 | 5.27E-15    |
| GARS1-DT         | 1.286304124 | 1.131663959 | 1.462075634 | 0.000116834 |
| AC010761.1       | 1.323554328 | 1.175900293 | 1.489748807 | 3.40E-06    |
| AL157392.4       | 1.520066936 | 1.230641415 | 1.877560322 | 0.000102015 |
| LINC01311        | 2.058778751 | 1.580792843 | 2.681293734 | 8.45E-08    |
| PDXDC2P-NPIPB14P | 1.649910151 | 1.372235465 | 1.983772885 | 1.01E-07    |
| AC106782.5       | 1.412240133 | 1.166779732 | 1.709339081 | 0.000395043 |
| INE1             | 1.37725074  | 1.210822883 | 1.566554141 | 1.11E-06    |
| AL137244.1       | 3.048868493 | 1.642510364 | 5.659385347 | 0.0004119   |
| AC004148.1       | 1.248605212 | 1.146266183 | 1.360081104 | 3.61E-07    |
| AL049780.1       | 1.323268901 | 1.125895482 | 1.555242571 | 0.000676822 |
| AP000866.6       | 1.523958258 | 1.241456535 | 1.870745134 | 5.64E-05    |
| ITPR1-DT         | 1.369487796 | 1.159177187 | 1.617955257 | 0.000218691 |
| AC087289.2       | 4.210794598 | 2.50796725  | 7.069785757 | 5.39E-08    |
| AC008764.8       | 2.063167081 | 1.575847532 | 2.701186706 | 1.38E-07    |
| AC009053.3       | 0.900926184 | 0.848287052 | 0.956831756 | 0.000682405 |
| MYOSLID          | 1.113071691 | 1.071072151 | 1.156718142 | 4.80E-08    |
| LINC00342        | 1.160718206 | 1.103387713 | 1.221027513 | 8.08E-09    |
| AL359921.1       | 1.798352452 | 1.304260045 | 2.479621724 | 0.000342677 |
| AC156455.1       | 1.113836185 | 1.068350103 | 1.161258882 | 4.02E-07    |
| MIR223HG         | 1.181343644 | 1.092317067 | 1.27762611  | 3.06E-05    |
| ZNF436-AS1       | 1.361876376 | 1.196353985 | 1.550299731 | 2.99E-06    |
| AC006435.2       | 1.358855865 | 1.187738396 | 1.554626227 | 7.99E-06    |
| UBE2Q1-AS1       | 2.322127593 | 1.625471112 | 3.317362282 | 3.67E-06    |
| AC005393.1       | 1.820714923 | 1.454395298 | 2.279299744 | 1.71E-07    |
| AC127024.6       | 2.741532273 | 1.889292141 | 3.978209107 | 1.10E-07    |
| IL10RB-DT        | 2.566778105 | 1.687158878 | 3.904996693 | 1.07E-05    |
| AC008105.2       | 1.348604664 | 1.213551546 | 1.498687506 | 2.77E-08    |
| AL158151.4       | 1.823916485 | 1.515245764 | 2.19546652  | 2.11E-10    |
| YEATS2-AS1       | 2.266322081 | 1.69164164  | 3.036231583 | 4.18E-08    |
| AC084876.1       | 1.645000544 | 1.42461521  | 1.89947908  | 1.18E-11    |
| LENG8-AS1        | 1.124179618 | 1.067552359 | 1.183810614 | 9.05E-06    |
| LINC01234        | 1.133429505 | 1.053612006 | 1.219293663 | 0.000774731 |
| AC002553.2       | 1.431706117 | 1.226670358 | 1.671013235 | 5.35E-06    |
| U91328.3         | 1.670366472 | 1.354526662 | 2.059851778 | 1.61E-06    |
| AC092171.4       | 1.365993982 | 1.187730661 | 1.571012369 | 1.23E-05    |



|                        |             |             |             |             |
|------------------------|-------------|-------------|-------------|-------------|
| AC022167.2             | 1.937150779 | 1.401390897 | 2.677734777 | 6.26E-05    |
| LINC02019              | 2.569381282 | 1.739010091 | 3.796251792 | 2.16E-06    |
| AC005306.1             | 2.109002612 | 1.538322349 | 2.891391405 | 3.56E-06    |
| ANKRD10-IT1            | 1.04761294  | 1.020216423 | 1.075745153 | 0.000581051 |
| AC010719.1             | 1.315354671 | 1.166850904 | 1.482758342 | 7.31E-06    |
| AC253576.2             | 1.505081199 | 1.186330923 | 1.909475148 | 0.00075943  |
| AP001767.2             | 1.67980807  | 1.312302753 | 2.150231833 | 3.83E-05    |
| STAG3L5P-PVRIG2P-PILRB | 1.212423335 | 1.0820374   | 1.358520827 | 0.000905967 |
| LINC01160              | 3.760758858 | 2.208698679 | 6.403457078 | 1.07E-06    |
| AP000553.2             | 1.507746331 | 1.278513399 | 1.778079919 | 1.06E-06    |
| AC011468.1             | 1.218255499 | 1.129940097 | 1.313473576 | 2.72E-07    |
| LINC01270              | 3.68327184  | 2.382733147 | 5.69366799  | 4.44E-09    |
| AC099850.3             | 1.115228896 | 1.073900456 | 1.158147837 | 1.51E-08    |
| AL157394.1             | 1.59687627  | 1.283682555 | 1.986483195 | 2.65E-05    |
| AC022973.5             | 3.944112495 | 2.147701564 | 7.243102876 | 9.65E-06    |
| AF117829.1             | 1.586502177 | 1.31602514  | 1.912569205 | 1.30E-06    |
| AC245052.4             | 2.595978961 | 1.499591324 | 4.493962226 | 0.000656498 |
| AC087741.1             | 1.317648459 | 1.186572628 | 1.463203702 | 2.47E-07    |
| PTOV1-AS2              | 1.131620147 | 1.076762305 | 1.189272833 | 1.08E-06    |
| AL359504.1             | 1.615516778 | 1.304359838 | 2.00090066  | 1.11E-05    |
| AL390728.5             | 1.063817669 | 1.036597622 | 1.091752489 | 2.90E-06    |
| PVT1                   | 1.156411522 | 1.093091082 | 1.223399981 | 4.24E-07    |
| AP006621.2             | 1.127179886 | 1.0562307   | 1.202894875 | 0.000307096 |
| AC245128.3             | 1.54570267  | 1.23394238  | 1.936230396 | 0.000151267 |
| AC124067.2             | 1.344769392 | 1.20749029  | 1.497655703 | 6.97E-08    |
| COL18A1-AS1            | 0.041235466 | 0.006777608 | 0.250879609 | 0.000538371 |
| LINC01004              | 1.249642066 | 1.15728393  | 1.349370931 | 1.28E-08    |
| NALT1                  | 1.498837416 | 1.31184335  | 1.712486175 | 2.64E-09    |
| AL359880.1             | 1.735295893 | 1.294175442 | 2.326772506 | 0.000230352 |
| NRIR                   | 1.806580816 | 1.307870141 | 2.495457417 | 0.000332671 |
| LINC01389              | 1.871177075 | 1.482340601 | 2.362010219 | 1.35E-07    |
| AC004687.1             | 1.190043824 | 1.073573646 | 1.319149653 | 0.000929933 |
| AC131009.3             | 1.243009782 | 1.130404314 | 1.366832468 | 7.13E-06    |
| LINC00426              | 1.655899265 | 1.237642776 | 2.215503884 | 0.000685503 |
| AC126118.1             | 1.654865925 | 1.282395138 | 2.135520596 | 0.000108033 |
| AL135999.1             | 1.429370847 | 1.226560224 | 1.665716022 | 4.75E-06    |
| AC005899.6             | 1.162138618 | 1.064290063 | 1.26898316  | 0.000812699 |
| AL023653.1             | 1.847388829 | 1.466510355 | 2.327188127 | 1.89E-07    |
| AL022067.1             | 1.659116102 | 1.300395941 | 2.116790858 | 4.64E-05    |
| SCGB1B2P               | 1.232731551 | 1.137121217 | 1.336380902 | 3.78E-07    |
| FAM13A-AS1             | 1.303451967 | 1.142777393 | 1.486717397 | 7.87E-05    |
| SNHG4                  | 1.895464681 | 1.522324703 | 2.360065727 | 1.08E-08    |
| AC244197.2             | 1.351164847 | 1.200954281 | 1.520163152 | 5.58E-07    |
| ITGB1-DT               | 1.11280941  | 1.045195756 | 1.184796988 | 0.000831407 |
| AC132872.3             | 1.043909435 | 1.018232552 | 1.070233814 | 0.000719778 |
| FOXO6-AS1              | 1.821299205 | 1.329663151 | 2.494715139 | 0.000187776 |
| AL354760.1             | 2.748155759 | 2.057459979 | 3.670720282 | 7.64E-12    |
| AC004034.1             | 2.860799545 | 2.010536273 | 4.070642319 | 5.19E-09    |
| SNHG3                  | 1.131645462 | 1.093063058 | 1.171589729 | 2.79E-12    |
| AC093535.1             | 1.507100468 | 1.183489745 | 1.919198564 | 0.000881126 |
| AC026471.4             | 1.059697799 | 1.031491204 | 1.088675716 | 2.53E-05    |
| AC008735.2             | 1.085986203 | 1.044392347 | 1.129236572 | 3.48E-05    |
| AC090589.3             | 1.338930418 | 1.165939655 | 1.537587865 | 3.55E-05    |
| AC004908.1             | 1.234022107 | 1.154778689 | 1.318703381 | 5.31E-10    |
| AC073575.2             | 2.516878519 | 1.669219085 | 3.794994638 | 1.06E-05    |
| KDM2B-DT               | 2.448371441 | 1.501766932 | 3.991646495 | 0.000329967 |
| AC008870.2             | 2.234304358 | 1.747557696 | 2.856624406 | 1.43E-10    |
| AL133410.1             | 1.948544665 | 1.540243971 | 2.465081105 | 2.69E-08    |

|              |             |             |             |             |
|--------------|-------------|-------------|-------------|-------------|
| AC007014.2   | 1.327101439 | 1.131504118 | 1.556510668 | 0.000503996 |
| AP001160.1   | 1.581547087 | 1.353074086 | 1.84859884  | 8.49E-09    |
| AC015819.1   | 1.463024324 | 1.204756198 | 1.776658361 | 0.000123189 |
| ADAMTSL4-AS2 | 1.255588166 | 1.124822762 | 1.401555601 | 4.99E-05    |
| AL122125.1   | 1.515628518 | 1.185471216 | 1.937735622 | 0.000909115 |
| PSPC1-AS2    | 1.699792275 | 1.391263644 | 2.076740662 | 2.09E-07    |
| C10orf55     | 3.382895098 | 2.053081278 | 5.574050753 | 1.73E-06    |
| AC092809.4   | 2.190976258 | 1.612611733 | 2.976771695 | 5.28E-07    |
| U62317.1     | 1.063455307 | 1.043005838 | 1.084305714 | 5.29E-10    |
| AC020907.4   | 1.362676563 | 1.226950719 | 1.513416461 | 7.44E-09    |
| LINC02328    | 2.080732943 | 1.598885622 | 2.707791928 | 4.98E-08    |
| AC005104.1   | 1.348312808 | 1.186093096 | 1.532719002 | 4.89E-06    |
| WDFY3-AS2    | 0.737416991 | 0.640187098 | 0.849413898 | 2.42E-05    |
| NARF-IT1     | 2.179104875 | 1.589297161 | 2.987797482 | 1.32E-06    |
| AL022322.1   | 1.180470747 | 1.080445392 | 1.289756238 | 0.000239965 |
| AC010201.1   | 1.61412887  | 1.338239803 | 1.946894721 | 5.54E-07    |
| AC087289.5   | 2.339629932 | 1.573219448 | 3.479405384 | 2.70E-05    |
| LINC00174    | 1.219058826 | 1.120360288 | 1.326452246 | 4.26E-06    |
| AC040160.1   | 2.059697357 | 1.405442887 | 3.018516969 | 0.000211141 |
| LINC02804    | 1.596759145 | 1.210319689 | 2.10658373  | 0.000932439 |
| AC084036.1   | 1.081846028 | 1.044969718 | 1.120023681 | 8.75E-06    |
| MRPL20-DT    | 1.608183749 | 1.367880385 | 1.890702578 | 8.73E-09    |
| AP000919.3   | 2.960241875 | 1.561254857 | 5.612813258 | 0.000885078 |
| AC138207.4   | 1.303815499 | 1.125348085 | 1.510585816 | 0.000411909 |
| AL513218.1   | 1.690523968 | 1.425535392 | 2.004770491 | 1.58E-09    |
| AC018648.1   | 2.170785056 | 1.738143295 | 2.711115806 | 8.22E-12    |
| AC020658.5   | 2.108812823 | 1.591519534 | 2.7942425   | 2.03E-07    |
| AC090772.3   | 1.822531341 | 1.288291498 | 2.578314375 | 0.000695999 |
| AC090948.3   | 1.465270713 | 1.20017318  | 1.788923713 | 0.000175491 |
| LINC02747    | 0.963484939 | 0.948958254 | 0.978233999 | 1.59E-06    |
| AC087623.1   | 1.28015546  | 1.124016633 | 1.457983764 | 0.000197993 |
| AL596223.2   | 1.612190682 | 1.235868913 | 2.103102333 | 0.000429216 |
| AC091057.1   | 3.986387496 | 2.369529886 | 6.706513964 | 1.88E-07    |
| MUC12-AS1    | 1.155447511 | 1.100847294 | 1.21275581  | 4.91E-09    |
| AC103706.1   | 1.519713915 | 1.370620359 | 1.685025593 | 1.96E-15    |
| AL031670.1   | 1.67721444  | 1.334672617 | 2.107669135 | 9.13E-06    |
| AC114730.3   | 1.746292154 | 1.332224698 | 2.289055511 | 5.41E-05    |
| AL162171.1   | 0.523942169 | 0.361128968 | 0.760158895 | 0.000663518 |
| AC243960.1   | 1.260944233 | 1.132197731 | 1.404330987 | 2.45E-05    |
| AL022238.2   | 1.847298705 | 1.370261461 | 2.490409752 | 5.66E-05    |
| AC022126.1   | 3.186250948 | 1.974528779 | 5.141578695 | 2.07E-06    |
| LINC01943    | 1.623404742 | 1.382139432 | 1.906785159 | 3.58E-09    |
| AL117379.1   | 1.286201931 | 1.181072216 | 1.400689464 | 7.24E-09    |
| AC011005.4   | 1.501081668 | 1.254121458 | 1.796673009 | 9.47E-06    |
| AC005840.2   | 1.362675527 | 1.191761987 | 1.558100201 | 6.02E-06    |
| AL158212.2   | 1.838213184 | 1.466001602 | 2.304927707 | 1.34E-07    |
| AC067945.2   | 2.579658552 | 1.673459967 | 3.976574508 | 1.77E-05    |
| AL731567.1   | 1.339014845 | 1.205091014 | 1.487821861 | 5.64E-08    |
| AC068790.5   | 1.404873947 | 1.152770709 | 1.712110475 | 0.000754874 |
| AL139349.1   | 1.095944845 | 1.054823197 | 1.138669595 | 2.66E-06    |
| CYTOR        | 1.06109772  | 1.034379045 | 1.088506554 | 5.17E-06    |
| AC068051.1   | 0.336091799 | 0.186623764 | 0.605269635 | 0.000280457 |
| LINC01843    | 0.801926876 | 0.730966028 | 0.879776474 | 3.02E-06    |
| ZKSCAN2-DT   | 1.601221516 | 1.353625316 | 1.894106377 | 3.96E-08    |
| AC139100.2   | 1.142806936 | 1.068280885 | 1.222532117 | 0.000104609 |
| FOX D2-AS1   | 1.54700378  | 1.37471392  | 1.740886349 | 4.40E-13    |
| KDM4A-AS1    | 1.989671057 | 1.523927001 | 2.597756266 | 4.28E-07    |
| AC021078.1   | 1.12715666  | 1.052902345 | 1.206647646 | 0.000576188 |

|            |             |             |             |             |
|------------|-------------|-------------|-------------|-------------|
| AC127070.1 | 3.067480164 | 1.766974305 | 5.325167735 | 6.81E-05    |
| AL645940.1 | 2.117523008 | 1.615491859 | 2.775565636 | 5.51E-08    |
| AC005387.1 | 1.899498277 | 1.490219124 | 2.421183333 | 2.20E-07    |
| ITGB2-AS1  | 1.122181442 | 1.063019945 | 1.184635524 | 3.03E-05    |
| AC105020.1 | 1.158693995 | 1.065704999 | 1.259796825 | 0.000558765 |
| AC073487.1 | 1.699290915 | 1.335676066 | 2.161893657 | 1.59E-05    |
| AC127502.2 | 1.206004225 | 1.130112754 | 1.286992105 | 1.62E-08    |
| AC124854.1 | 0.906086089 | 0.872121518 | 0.941373401 | 4.21E-07    |
| LINC01138  | 1.563991023 | 1.353323253 | 1.807452812 | 1.37E-09    |
| AC004908.3 | 1.569941497 | 1.352988125 | 1.821683618 | 2.78E-09    |
| AC011498.6 | 1.513564181 | 1.224097556 | 1.871481988 | 0.000129692 |
| RNF139-AS1 | 5.627805285 | 3.283817362 | 9.64493114  | 3.26E-10    |
| AC016957.2 | 1.754293011 | 1.388699494 | 2.216133861 | 2.43E-06    |
| LINC00528  | 2.1988449   | 1.524055906 | 3.172402583 | 2.52E-05    |
| LASTR      | 1.175673733 | 1.112363214 | 1.242587592 | 1.00E-08    |
| DPP9-AS1   | 1.739821028 | 1.289139601 | 2.348060059 | 0.000294257 |
| AC002070.1 | 0.667569538 | 0.560340949 | 0.795317724 | 6.08E-06    |
| AC092118.2 | 1.562854215 | 1.2758992   | 1.914346601 | 1.60E-05    |
| AL606534.1 | 4.426643394 | 2.247007323 | 8.72056425  | 1.71E-05    |
| AC007038.1 | 1.176293019 | 1.090557495 | 1.268768747 | 2.61E-05    |
| LINC02154  | 1.062266137 | 1.035921684 | 1.089280554 | 2.43E-06    |
| MMP25-AS1  | 1.177793921 | 1.081250121 | 1.282958025 | 0.000176711 |
| AC027796.4 | 1.297206226 | 1.183694032 | 1.421603849 | 2.56E-08    |
| LINC02195  | 1.628666741 | 1.354363214 | 1.958525843 | 2.18E-07    |
| AL161452.1 | 2.625598482 | 1.625665232 | 4.24058241  | 7.93E-05    |
| NCBP2-AS1  | 2.949397405 | 1.736871279 | 5.00839939  | 6.24E-05    |

#### Multivariate Cox analysis

| LncRNA        | coef         | HR          | HR.95L      | HR.95H      |
|---------------|--------------|-------------|-------------|-------------|
| AC026401.3    | 0.062124799  | 1.064095135 | 0.990621474 | 1.143018283 |
| LINC01615     | 0.057177391  | 1.058843623 | 1.015436862 | 1.104105888 |
| `PRKAR1B-AS1` | 0.049535837  | 1.050783249 | 0.994718885 | 1.110007513 |
| LINC02609     | 0.221623791  | 1.248101742 | 1.05376734  | 1.478275042 |
| LINC00460     | 0.039951118  | 1.040759899 | 0.9953125   | 1.088282491 |
| AC084876.1    | 0.251078409  | 1.285410868 | 1.042947972 | 1.584241156 |
| AC008870.2    | 0.298935357  | 1.348422455 | 0.95027485  | 1.91338655  |
| LINC02747     | -0.018735587 | 0.981438833 | 0.966483507 | 0.996625578 |
| AC103706.1    | 0.172116641  | 1.187816374 | 0.980619097 | 1.438792843 |

Table S6 FRLRS set enrichment analyses and immunity gene expression

| NAME                                                            | SIZE | ES    | NES   | NOM p-val | FDR q-val | FWER p-val | RANK AT MAX LEADING EDGE            |
|-----------------------------------------------------------------|------|-------|-------|-----------|-----------|------------|-------------------------------------|
| KEGG_VASOPRESSIN_REGULATED_WATER_REABSORPTION                   | 44   | -0.68 | -2.33 | 0         | 0.014312  | 0.011      | 6520 tags=61%, list=12%, signal=70% |
| KEGG_PROSTATE_CANCER                                            | 89   | -0.62 | -2.25 | 0         | 0.021235  | 0.024      | 5067 tags=51%, list=9%, signal=56%  |
| KEGG_PROPANOATE_METABOLISM                                      | 33   | -0.8  | -2.23 | 0         | 0.01703   | 0.03       | 5342 tags=64%, list=10%, signal=70% |
| KEGG_PEROXISOME                                                 | 78   | -0.7  | -2.21 | 0.0040241 | 0.01439   | 0.033      | 6032 tags=59%, list=11%, signal=66% |
| KEGG_ENDOMETRIAL_CANCER                                         | 52   | -0.67 | -2.21 | 0         | 0.011896  | 0.033      | 5658 tags=60%, list=10%, signal=66% |
| KEGG_VALINE_LEUCINE_AND_ISOLEUCINE_DEGRADATION                  | 44   | -0.81 | -2.19 | 0.001992  | 0.012489  | 0.038      | 6507 tags=80%, list=12%, signal=90% |
| KEGG_PROXIMAL_TUBULE_BICARBONATE_RECLAMATION                    | 23   | -0.76 | -2.19 | 0         | 0.010705  | 0.038      | 8201 tags=74%, list=15%, signal=87% |
| KEGG_INSULIN_SIGNALING_PATHWAY                                  | 137  | -0.52 | -2.19 | 0         | 0.009498  | 0.039      | 4332 tags=38%, list=8%, signal=41%  |
| KEGG_ADHERENS_JUNCTION                                          | 73   | -0.64 | -2.19 | 0.002004  | 0.008879  | 0.04       | 5067 tags=55%, list=9%, signal=60%  |
| KEGG_ERBB_SIGNALING_PATHWAY                                     | 87   | -0.57 | -2.18 | 0         | 0.008383  | 0.041      | 5658 tags=49%, list=10%, signal=55% |
| KEGG_TIGHT_JUNCTION                                             | 132  | -0.55 | -2.17 | 0         | 0.008241  | 0.044      | 5885 tags=45%, list=11%, signal=50% |
| KEGG_ADIPOCYTOKINE_SIGNALING_PATHWAY                            | 67   | -0.56 | -2.15 | 0         | 0.009375  | 0.055      | 8033 tags=55%, list=15%, signal=65% |
| KEGG_ENDOCYTOSIS                                                | 181  | -0.53 | -2.14 | 0.0020325 | 0.00945   | 0.058      | 6437 tags=49%, list=12%, signal=55% |
| KEGG_RENAL_CELL_CARCINOMA                                       | 70   | -0.61 | -2.11 | 0.0020121 | 0.010519  | 0.064      | 4785 tags=49%, list=9%, signal=53%  |
| KEGG_SPHINGOLIPID_METABOLISM                                    | 39   | -0.61 | -2.11 | 0.0040241 | 0.010811  | 0.071      | 6930 tags=56%, list=13%, signal=64% |
| KEGG_FATTY_ACID_METABOLISM                                      | 42   | -0.75 | -2.08 | 0.0040816 | 0.012479  | 0.082      | 8308 tags=81%, list=15%, signal=95% |
| KEGG_TRYPTOPHAN_METABOLISM                                      | 40   | -0.63 | -2.08 | 0.0020367 | 0.013074  | 0.086      | 7871 tags=60%, list=14%, signal=70% |
| KEGG_MELANOMA                                                   | 71   | -0.51 | -2.06 | 0         | 0.014382  | 0.097      | 6040 tags=39%, list=11%, signal=44% |
| KEGG_NEUROTROPHIN_SIGNALING_PATHWAY                             | 126  | -0.55 | -2.06 | 0         | 0.013955  | 0.099      | 5658 tags=48%, list=10%, signal=53% |
| KEGG_CITRATE_CYCLE_TCA_CYCLE                                    | 31   | -0.83 | -2.04 | 0.0019802 | 0.015152  | 0.108      | 5155 tags=77%, list=9%, signal=85%  |
| KEGG_RENIN_ANGIOTENSIN_SYSTEM                                   | 17   | -0.67 | -2.02 | 0         | 0.017782  | 0.125      | 7982 tags=71%, list=14%, signal=82% |
| KEGG_BUTANOATE_METABOLISM                                       | 34   | -0.69 | -2.02 | 0.0060852 | 0.017541  | 0.126      | 8273 tags=74%, list=15%, signal=86% |
| KEGG_THYROID_CANCER                                             | 29   | -0.61 | -2    | 0         | 0.02016   | 0.139      | 5783 tags=55%, list=10%, signal=62% |
| KEGG_PYRUVATE_METABOLISM                                        | 40   | -0.65 | -2    | 0.0102459 | 0.019462  | 0.141      | 8681 tags=63%, list=16%, signal=74% |
| KEGG_WNT_SIGNALING_PATHWAY                                      | 151  | -0.5  | -2    | 0.0060484 | 0.019221  | 0.145      | 5120 tags=36%, list=9%, signal=39%  |
| KEGG_TGF_BETA_SIGNALING_PATHWAY                                 | 86   | -0.57 | -1.99 | 0.0080808 | 0.019344  | 0.149      | 4741 tags=43%, list=9%, signal=47%  |
| KEGG_LYSINE_DEGRADATION                                         | 44   | -0.61 | -1.99 | 0.0098619 | 0.019246  | 0.154      | 3146 tags=43%, list=6%, signal=46%  |
| KEGG_COLORECTAL_CANCER                                          | 62   | -0.6  | -1.99 | 0.0039761 | 0.019525  | 0.162      | 6310 tags=56%, list=11%, signal=64% |
| KEGG_GLYCOLYSIS_GLUONEOGENESIS                                  | 62   | -0.61 | -1.98 | 0.012     | 0.019671  | 0.167      | 8308 tags=60%, list=15%, signal=70% |
| KEGG_LONG_TERM_POTENTIATION                                     | 70   | -0.51 | -1.97 | 0         | 0.02048   | 0.174      | 6134 tags=43%, list=11%, signal=48% |
| KEGG_INOSITOL_PHOSPHATE_METABOLISM                              | 54   | -0.59 | -1.95 | 0.0039761 | 0.023925  | 0.196      | 3439 tags=39%, list=6%, signal=41%  |
| KEGG_NON_SMALL_CELL_LUNG_CANCER                                 | 54   | -0.56 | -1.94 | 0.0020367 | 0.024883  | 0.206      | 5783 tags=50%, list=10%, signal=56% |
| KEGG_GLIOMA                                                     | 65   | -0.52 | -1.94 | 0         | 0.024187  | 0.207      | 5658 tags=45%, list=10%, signal=50% |
| KEGG_TERPENOID_BACKBONE_BIOSYNTHESIS                            | 15   | -0.7  | -1.93 | 0.0076923 | 0.024739  | 0.211      | 5725 tags=60%, list=10%, signal=67% |
| KEGG_PANCREATIC_CANCER                                          | 70   | -0.57 | -1.93 | 0.01      | 0.025569  | 0.217      | 6249 tags=50%, list=11%, signal=56% |
| KEGG_ALDOSTERONE_REGULATED_SODIUM_REABSORPTION                  | 42   | -0.55 | -1.93 | 0.0102459 | 0.025128  | 0.219      | 8033 tags=55%, list=15%, signal=64% |
| KEGG_PPAR_SIGNALING_PATHWAY                                     | 69   | -0.58 | -1.91 | 0.0100402 | 0.0267    | 0.229      | 5806 tags=45%, list=10%, signal=50% |
| KEGG_TYPE_II_DIABETES_MELLITUS                                  | 47   | -0.51 | -1.9  | 0.0100604 | 0.028042  | 0.246      | 5450 tags=38%, list=10%, signal=42% |
| KEGG_EPITHELIAL_CELL_SIGNALING_IN_HELICOBACTER_PYLORI_INFECTION | 68   | -0.53 | -1.9  | 0.017341  | 0.028941  | 0.259      | 6968 tags=50%, list=13%, signal=57% |
| KEGG_CHRONIC_MYELOID_LEUKEMIA                                   | 73   | -0.57 | -1.89 | 0.0080483 | 0.030243  | 0.273      | 3437 tags=44%, list=6%, signal=47%  |
| KEGG_GLYCOSYLPHOSPHATIDYLINOSITOL_GPI_ANCHOR_BIOSYNTHESIS       | 25   | -0.62 | -1.88 | 0.0060484 | 0.03111   | 0.278      | 6545 tags=56%, list=12%, signal=63% |
| KEGG_UBIQUITIN_MEDIATED_PROTEOLYSIS                             | 135  | -0.51 | -1.87 | 0.0140562 | 0.033344  | 0.292      | 5695 tags=42%, list=10%, signal=47% |
| KEGG_PATHWAYS_IN_CANCER                                         | 325  | -0.44 | -1.86 | 0.0118343 | 0.033683  | 0.295      | 6310 tags=38%, list=11%, signal=43% |
| KEGG_AXON_GUIDANCE                                              | 129  | -0.47 | -1.86 | 0.0178926 | 0.033311  | 0.301      | 5844 tags=41%, list=11%, signal=46% |
| KEGG_DORSO_VENTRAL_AXIS_FORMATION                               | 24   | -0.59 | -1.85 | 0.0060729 | 0.034527  | 0.309      | 5211 tags=54%, list=9%, signal=60%  |

|                                                               |     |       |       |           |          |       |                                      |
|---------------------------------------------------------------|-----|-------|-------|-----------|----------|-------|--------------------------------------|
| KEGG_REGULATION_OF_ACTIN_CYTOSKELETON                         | 213 | -0.45 | -1.83 | 0.0252918 | 0.039178 | 0.339 | 5067 tags=34%, list=9%, signal=38%   |
| KEGG_MELANOGENESIS                                            | 101 | -0.44 | -1.82 | 0.0099404 | 0.041623 | 0.356 | 5120 tags=35%, list=9%, signal=38%   |
| KEGG_GLYCINE_SERINE_AND_THREONINE_METABOLISM                  | 31  | -0.61 | -1.81 | 0.0243408 | 0.043032 | 0.368 | 8330 tags=55%, list=15%, signal=65%  |
| KEGG_FOCAL_ADHESION                                           | 199 | -0.48 | -1.81 | 0.0355731 | 0.042544 | 0.369 | 4357 tags=33%, list=8%, signal=36%   |
| KEGG_BIOSYNTHESIS_OF_UNSATURATED_FATTY_ACIDS                  | 22  | -0.59 | -1.8  | 0.0186722 | 0.042475 | 0.371 | 7836 tags=59%, list=14%, signal=69%  |
| KEGG_MTOR_SIGNALING_PATHWAY                                   | 52  | -0.49 | -1.8  | 0.0162272 | 0.043561 | 0.383 | 4785 tags=37%, list=9%, signal=40%   |
| KEGG_GAP_JUNCTION                                             | 90  | -0.48 | -1.79 | 0.0140562 | 0.043163 | 0.385 | 7642 tags=43%, list=14%, signal=50%  |
| KEGG_BETA_ALANINE_METABOLISM                                  | 22  | -0.65 | -1.78 | 0.036017  | 0.04677  | 0.41  | 8170 tags=73%, list=15%, signal=85%  |
| KEGG_VASCULAR_SMOOTH_MUSCLE_CONTRACTION                       | 115 | -0.44 | -1.77 | 0.0216963 | 0.047012 | 0.416 | 7038 tags=41%, list=13%, signal=47%  |
| KEGG_OOCYTE_MEIOSIS                                           | 113 | -0.45 | -1.77 | 0.0238095 | 0.046262 | 0.417 | 4808 tags=41%, list=9%, signal=44%   |
| KEGG_LONG_TERM_DEPRESSION                                     | 70  | -0.42 | -1.76 | 0.0105042 | 0.048915 | 0.429 | 4990 tags=31%, list=9%, signal=35%   |
| KEGG_PHOSPHATIDYLINOSITOL_SIGNALING_SYSTEM                    | 76  | -0.49 | -1.76 | 0.0178926 | 0.048974 | 0.436 | 6610 tags=43%, list=12%, signal=49%  |
| KEGG_GNRH_SIGNALING_PATHWAY                                   | 101 | -0.4  | -1.76 | 0.0097087 | 0.048926 | 0.439 | 6520 tags=39%, list=12%, signal=44%  |
| KEGG_HISTIDINE_METABOLISM                                     | 29  | -0.55 | -1.75 | 0.0470348 | 0.048281 | 0.439 | 5823 tags=41%, list=11%, signal=46%  |
| KEGG_REGULATION_OF_AUTOPHAGY                                  | 35  | -0.48 | -1.75 | 0.0097656 | 0.049714 | 0.447 | 5154 tags=34%, list=9%, signal=38%   |
| KEGG_MAPK_SIGNALING_PATHWAY                                   | 267 | -0.39 | -1.73 | 0.0183299 | 0.053882 | 0.467 | 6481 tags=36%, list=12%, signal=40%  |
| KEGG_ARGININE_AND_PROLINE_METABOLISM                          | 54  | -0.5  | -1.73 | 0.0323194 | 0.054683 | 0.474 | 6605 tags=43%, list=12%, signal=48%  |
| KEGG_ONE_CARBON_POOL_BY_FOLATE                                | 17  | -0.61 | -1.72 | 0.0281125 | 0.055022 | 0.478 | 6071 tags=53%, list=11%, signal=59%  |
| KEGG_O_GLYCAN_BIOSYNTHESIS                                    | 30  | -0.49 | -1.71 | 0.0229167 | 0.056674 | 0.486 | 10141 tags=53%, list=18%, signal=65% |
| KEGG_ACUTE_MYELOID_LEUKEMIA                                   | 57  | -0.5  | -1.7  | 0.0426829 | 0.058942 | 0.504 | 5658 tags=47%, list=10%, signal=53%  |
| KEGG_LEUKOCYTE_TRANSENDOTHELIAL_MIGRATION                     | 116 | -0.45 | -1.69 | 0.040856  | 0.064502 | 0.531 | 5247 tags=39%, list=9%, signal=43%   |
| KEGG_SELENOAMINO_ACID_METABOLISM                              | 26  | -0.51 | -1.68 | 0.0390625 | 0.064397 | 0.535 | 6120 tags=42%, list=11%, signal=48%  |
| KEGG_BLADDER_CANCER                                           | 42  | -0.47 | -1.66 | 0.0217391 | 0.072262 | 0.564 | 5067 tags=40%, list=9%, signal=45%   |
| KEGG_PROGESTERONE_MEDIATED_OOCYTE_MATURATION                  | 85  | -0.44 | -1.64 | 0.0412574 | 0.078612 | 0.593 | 5915 tags=45%, list=11%, signal=50%  |
| KEGG_SMALL_CELL_LUNG_CANCER                                   | 84  | -0.47 | -1.63 | 0.0569745 | 0.081388 | 0.609 | 7170 tags=40%, list=13%, signal=46%  |
| KEGG_N_GLYCAN_BIOSYNTHESIS                                    | 46  | -0.5  | -1.62 | 0.0818363 | 0.08618  | 0.628 | 5277 tags=37%, list=10%, signal=41%  |
| KEGG_GLYCEROLIPID_METABOLISM                                  | 49  | -0.41 | -1.62 | 0.0264766 | 0.085257 | 0.628 | 6940 tags=37%, list=13%, signal=42%  |
| KEGG_CALCIIUM_SIGNALING_PATHWAY                               | 178 | -0.34 | -1.58 | 0.0257426 | 0.098504 | 0.668 | 7990 tags=37%, list=14%, signal=43%  |
| KEGG_FC_EPSILON_RI_SIGNALING_PATHWAY                          | 79  | -0.39 | -1.58 | 0.0560928 | 0.097698 | 0.67  | 5658 tags=35%, list=10%, signal=39%  |
| KEGG_STEROID_BIOSYNTHESIS                                     | 17  | -0.58 | -1.57 | 0.0789474 | 0.10067  | 0.681 | 8130 tags=59%, list=15%, signal=69%  |
| KEGG_VEGF_SIGNALING_PATHWAY                                   | 76  | -0.37 | -1.57 | 0.0336634 | 0.100951 | 0.689 | 5658 tags=36%, list=10%, signal=40%  |
| KEGG_CYSTEINE_AND_METHIONINE_METABOLISM                       | 34  | -0.47 | -1.56 | 0.039666  | 0.105857 | 0.71  | 6120 tags=41%, list=11%, signal=46%  |
| KEGG_ETHER_LIPID_METABOLISM                                   | 33  | -0.4  | -1.55 | 0.0458167 | 0.109629 | 0.724 | 4001 tags=30%, list=7%, signal=33%   |
| KEGG_APOPTOSIS                                                | 87  | -0.42 | -1.52 | 0.1024096 | 0.123792 | 0.761 | 7702 tags=41%, list=14%, signal=48%  |
| KEGG_AMINOACYL_TRNA_BIOSYNTHESIS                              | 41  | -0.5  | -1.51 | 0.118     | 0.128455 | 0.767 | 6180 tags=51%, list=11%, signal=58%  |
| KEGG_ARRHYTHMOGENIC_RIGHT_VENTRICULAR_CARDIOMYOPATHY_ARVC     | 74  | -0.41 | -1.51 | 0.0856574 | 0.127001 | 0.767 | 5000 tags=28%, list=9%, signal=31%   |
| KEGG_ALANINE_ASPARTATE_AND_GLUTAMATE_METABOLISM               | 32  | -0.51 | -1.5  | 0.0890269 | 0.129037 | 0.77  | 6605 tags=44%, list=12%, signal=50%  |
| KEGG_PANTOTHENATE_AND_COA_BIOSYNTHESIS                        | 16  | -0.5  | -1.5  | 0.0815109 | 0.129066 | 0.772 | 5887 tags=31%, list=11%, signal=35%  |
| KEGG_PROTEIN_EXPORT                                           | 24  | -0.53 | -1.49 | 0.1199187 | 0.131054 | 0.779 | 7217 tags=67%, list=13%, signal=77%  |
| KEGG_NITROGEN_METABOLISM                                      | 23  | -0.48 | -1.47 | 0.0582329 | 0.144087 | 0.806 | 6605 tags=30%, list=12%, signal=35%  |
| KEGG_B_CELL_RECEPTOR_SIGNALING_PATHWAY                        | 75  | -0.42 | -1.46 | 0.1395349 | 0.1479   | 0.82  | 5658 tags=39%, list=10%, signal=43%  |
| KEGG_GLYCOSPHINGOLIPID_BIOSYNTHESIS_LACTO_AND_NEOLACTO_SERIES | 26  | -0.41 | -1.45 | 0.0682261 | 0.14848  | 0.824 | 6301 tags=42%, list=11%, signal=48%  |
| KEGG_ASCORBATE_AND_ALDARATE_METABOLISM                        | 25  | -0.57 | -1.45 | 0.1012146 | 0.152506 | 0.838 | 8325 tags=56%, list=15%, signal=66%  |
| KEGG_VIBRIO_CHOLERAЕ_INFECTION                                | 54  | -0.44 | -1.44 | 0.1342685 | 0.151019 | 0.839 | 6968 tags=46%, list=13%, signal=53%  |
| KEGG_HUNTINGTONS_DISEASE                                      | 182 | -0.39 | -1.42 | 0.1745731 | 0.163625 | 0.858 | 5848 tags=31%, list=11%, signal=35%  |
| KEGG_GLYOXYLATE_AND_DICARBOXYLATE_METABOLISM                  | 16  | -0.54 | -1.41 | 0.1568228 | 0.166421 | 0.864 | 4893 tags=44%, list=9%, signal=48%   |
| KEGG_LYSOSOME                                                 | 121 | -0.4  | -1.38 | 0.197318  | 0.186466 | 0.891 | 7780 tags=52%, list=14%, signal=60%  |

|                                                     |     |       |       |           |          |       |                                      |
|-----------------------------------------------------|-----|-------|-------|-----------|----------|-------|--------------------------------------|
| KEGG_ALZHEIMERS_DISEASE                             | 166 | -0.37 | -1.38 | 0.1928166 | 0.189002 | 0.899 | 7867 tags=39%, list=14%, signal=46%  |
| KEGG_DRUG_METABOLISM_CYTOCHROME_P450                | 71  | -0.48 | -1.34 | 0.1208333 | 0.209734 | 0.914 | 9275 tags=51%, list=17%, signal=61%  |
| KEGG_PURINE_METABOLISM                              | 159 | -0.31 | -1.34 | 0.122288  | 0.209311 | 0.917 | 7803 tags=41%, list=14%, signal=47%  |
| KEGG_RETINOL_METABOLISM                             | 64  | -0.49 | -1.33 | 0.1239669 | 0.218018 | 0.924 | 9275 tags=55%, list=17%, signal=66%  |
| KEGG_RNA_DEGRADATION                                | 59  | -0.38 | -1.33 | 0.1854839 | 0.216344 | 0.924 | 7439 tags=44%, list=13%, signal=51%  |
| KEGG_SNARE_INTERACTIONS_IN_VESICULAR_TRANSPORT      | 38  | -0.38 | -1.32 | 0.170297  | 0.21521  | 0.925 | 3314 tags=29%, list=6%, signal=31%   |
| KEGG_JAK_STAT_SIGNALING_PATHWAY                     | 155 | -0.31 | -1.31 | 0.1719368 | 0.22471  | 0.931 | 3755 tags=23%, list=7%, signal=24%   |
| KEGG_STARCH_AND_SUCROSE_METABOLISM                  | 52  | -0.41 | -1.31 | 0.154334  | 0.224528 | 0.932 | 8492 tags=42%, list=15%, signal=50%  |
| KEGG_NICOTINATE_AND_NICOTINAMIDE_METABOLISM         | 24  | -0.39 | -1.3  | 0.1739131 | 0.228906 | 0.937 | 7466 tags=50%, list=13%, signal=58%  |
| KEGG_RIG_I LIKE RECEPTOR SIGNALING PATHWAY          | 71  | -0.34 | -1.29 | 0.1839081 | 0.233292 | 0.941 | 6906 tags=34%, list=12%, signal=39%  |
| KEGG_FC_GAMMA_R_MEDIATED_PHAGOCYTOSIS               | 96  | -0.36 | -1.29 | 0.2023576 | 0.233387 | 0.942 | 5766 tags=35%, list=10%, signal=39%  |
| KEGG_T_CELL_RECEPTOR_SIGNALING_PATHWAY              | 108 | -0.37 | -1.29 | 0.2417154 | 0.232782 | 0.942 | 5658 tags=36%, list=10%, signal=40%  |
| KEGG_NOTCH_SIGNALING_PATHWAY                        | 47  | -0.39 | -1.28 | 0.204     | 0.232557 | 0.945 | 6206 tags=40%, list=11%, signal=45%  |
| KEGG_METABOLISM_OF_XENOBIOTICS_BY_CYTOCHROME_P450   | 69  | -0.44 | -1.28 | 0.1869919 | 0.232755 | 0.948 | 9275 tags=48%, list=17%, signal=57%  |
| KEGG_TYROSINE_METABOLISM                            | 42  | -0.39 | -1.27 | 0.1925466 | 0.237008 | 0.949 | 8565 tags=43%, list=15%, signal=51%  |
| KEGG_FRUCTOSE_AND_MANNOSE_METABOLISM                | 34  | -0.4  | -1.27 | 0.2465753 | 0.236697 | 0.951 | 6592 tags=38%, list=12%, signal=43%  |
| KEGG_PRIMARY_BILE_ACID_BIOSYNTHESIS                 | 16  | -0.57 | -1.27 | 0.2186235 | 0.236554 | 0.952 | 9576 tags=75%, list=17%, signal=91%  |
| KEGG_GALACTOSE_METABOLISM                           | 26  | -0.39 | -1.25 | 0.2151395 | 0.246437 | 0.959 | 6460 tags=38%, list=12%, signal=44%  |
| KEGG_SPLICEOSOME                                    | 127 | -0.37 | -1.24 | 0.2893204 | 0.251827 | 0.965 | 5917 tags=38%, list=11%, signal=42%  |
| KEGG_PENTOSE_AND_GLUCURONATE_INTERCONVERSIONS       | 28  | -0.46 | -1.23 | 0.2270833 | 0.260109 | 0.971 | 8325 tags=46%, list=15%, signal=55%  |
| KEGG_PENTOSE_PHOSPHATE_PATHWAY                      | 27  | -0.39 | -1.23 | 0.2165992 | 0.258327 | 0.971 | 7664 tags=41%, list=14%, signal=47%  |
| KEGG_CHEMOKINE_SIGNALING_PATHWAY                    | 188 | -0.33 | -1.23 | 0.2604374 | 0.256842 | 0.971 | 3364 tags=22%, list=6%, signal=24%   |
| KEGG_TOLL LIKE RECEPTOR SIGNALING PATHWAY           | 102 | -0.33 | -1.22 | 0.272381  | 0.256379 | 0.971 | 3193 tags=22%, list=6%, signal=23%   |
| KEGG_HEDGEHOG_SIGNALING_PATHWAY                     | 56  | -0.33 | -1.22 | 0.2269939 | 0.257477 | 0.973 | 6299 tags=30%, list=11%, signal=34%  |
| KEGG_PATHOGENIC_ESCHERICHIA_COLI_INFECTION          | 56  | -0.37 | -1.2  | 0.2862903 | 0.269637 | 0.979 | 4543 tags=30%, list=8%, signal=33%   |
| KEGG_GLUTATHIONE_METABOLISM                         | 49  | -0.35 | -1.19 | 0.2648221 | 0.277484 | 0.979 | 7105 tags=37%, list=13%, signal=42%  |
| KEGG_DILATED_CARDIOMYOPATHY                         | 90  | -0.3  | -1.18 | 0.2757936 | 0.282301 | 0.983 | 7799 tags=32%, list=14%, signal=37%  |
| KEGG_PHENYLALANINE_METABOLISM                       | 18  | -0.39 | -1.16 | 0.2651822 | 0.300186 | 0.987 | 8279 tags=39%, list=15%, signal=46%  |
| KEGG_PORPHYRIN_AND_CHLOROPHYLL_METABOLISM           | 41  | -0.39 | -1.15 | 0.2929293 | 0.302215 | 0.987 | 8325 tags=41%, list=15%, signal=49%  |
| KEGG_HYPERTROPHIC_CARDIOMYOPATHY_HCM                | 83  | -0.3  | -1.15 | 0.2837022 | 0.301032 | 0.987 | 7930 tags=31%, list=14%, signal=37%  |
| KEGG_ECM_RECEPTOR_INTERACTION                       | 84  | -0.34 | -1.14 | 0.3171717 | 0.30657  | 0.988 | 7995 tags=36%, list=14%, signal=42%  |
| KEGG_BASAL_TRANSCRIPTION_FACTORS                    | 35  | -0.35 | -1.12 | 0.3339882 | 0.326106 | 0.994 | 8802 tags=51%, list=16%, signal=61%  |
| KEGG_AMINO_SUGAR_AND_NUCLEOTIDE_SUGAR_METABOLISM    | 44  | -0.35 | -1.11 | 0.3346303 | 0.329005 | 0.994 | 7957 tags=41%, list=14%, signal=48%  |
| KEGG_BASAL_CELL_CARINOMA                            | 55  | -0.3  | -1.11 | 0.3536585 | 0.332638 | 0.994 | 5120 tags=25%, list=9%, signal=28%   |
| KEGG_AMYOTROPHIC_LATERAL_SCLEROSIS_ALS              | 53  | -0.28 | -1.1  | 0.3202358 | 0.333824 | 0.994 | 6352 tags=26%, list=11%, signal=30%  |
| KEGG_CELL_ADHESION_MOLECULES_CAMS                   | 131 | -0.3  | -1.1  | 0.3444882 | 0.333563 | 0.994 | 5199 tags=24%, list=9%, signal=26%   |
| KEGG_CELL_CYCLE                                     | 125 | -0.32 | -1.08 | 0.3847695 | 0.348574 | 0.996 | 4790 tags=30%, list=9%, signal=33%   |
| KEGG_GLYCOSAMINOGLYCAN_BIOSYNTHESIS_HEPARAN_SULFATE | 26  | -0.32 | -1.07 | 0.3514056 | 0.360097 | 0.996 | 3951 tags=23%, list=7%, signal=25%   |
| KEGG_ABC_TRANSPORTERS                               | 44  | -0.28 | -1.06 | 0.375502  | 0.370552 | 0.996 | 8483 tags=34%, list=15%, signal=40%  |
| KEGG_NOD LIKE RECEPTOR SIGNALING PATHWAY            | 62  | -0.3  | -1.04 | 0.4177694 | 0.382693 | 0.998 | 4965 tags=29%, list=9%, signal=32%   |
| KEGG_NEUROACTIVE_LIGAND_RECEPTOR_INTERACTION        | 270 | -0.21 | -1.01 | 0.4132232 | 0.407654 | 0.999 | 6205 tags=18%, list=11%, signal=20%  |
| KEGG_MATURITY_ONSET_DIABETES_OF_THE_YOUNG           | 25  | -0.31 | -1.01 | 0.4391218 | 0.412286 | 0.999 | 10857 tags=48%, list=20%, signal=60% |
| KEGG_PARKINSONS_DISEASE                             | 130 | -0.34 | -0.99 | 0.4705882 | 0.432061 | 0.999 | 9368 tags=46%, list=17%, signal=55%  |
| KEGG_PRION_DISEASES                                 | 35  | -0.32 | -0.98 | 0.4702381 | 0.429514 | 0.999 | 8123 tags=40%, list=15%, signal=47%  |
| KEGG_OXIDATIVE_PHOSPHORYLATION                      | 132 | -0.36 | -0.95 | 0.5009901 | 0.461702 | 1     | 9368 tags=47%, list=17%, signal=56%  |
| KEGG_GLYCOSPHINGOLIPID_BIOSYNTHESIS_GANGLIO_SERIES  | 15  | -0.33 | -0.94 | 0.4928425 | 0.467185 | 1     | 9721 tags=53%, list=18%, signal=65%  |
| KEGG_STEROID_HORMONE_BIOSYNTHESIS                   | 55  | -0.28 | -0.83 | 0.7246377 | 0.602937 | 1     | 9275 tags=42%, list=17%, signal=50%  |

|                                                     |    |       |       |           |          |   |                                     |
|-----------------------------------------------------|----|-------|-------|-----------|----------|---|-------------------------------------|
| KEGG_DRUG_METABOLISM_OTHER_ENZYMES                  | 51 | -0.26 | -0.78 | 0.7556468 | 0.659239 | 1 | 8433 tags=41%, list=15%, signal=49% |
| KEGG_GLYCOSAMINOGLYCAN_BIOSYNTHESIS_KERATAN_SULFATE | 15 | -0.26 | -0.7  | 0.8253968 | 0.749804 | 1 | 1774 tags=13%, list=3%, signal=14%  |
