# Supplementary figures and images for: A Novel Prognostic Ferroptosis-Related Long Noncoding RNA Signature in Clear Cell Renal Cell Carcinoma
Source: Hindawi journal article supplement (doi:10.1155/2022/6304824), 2022-02-22

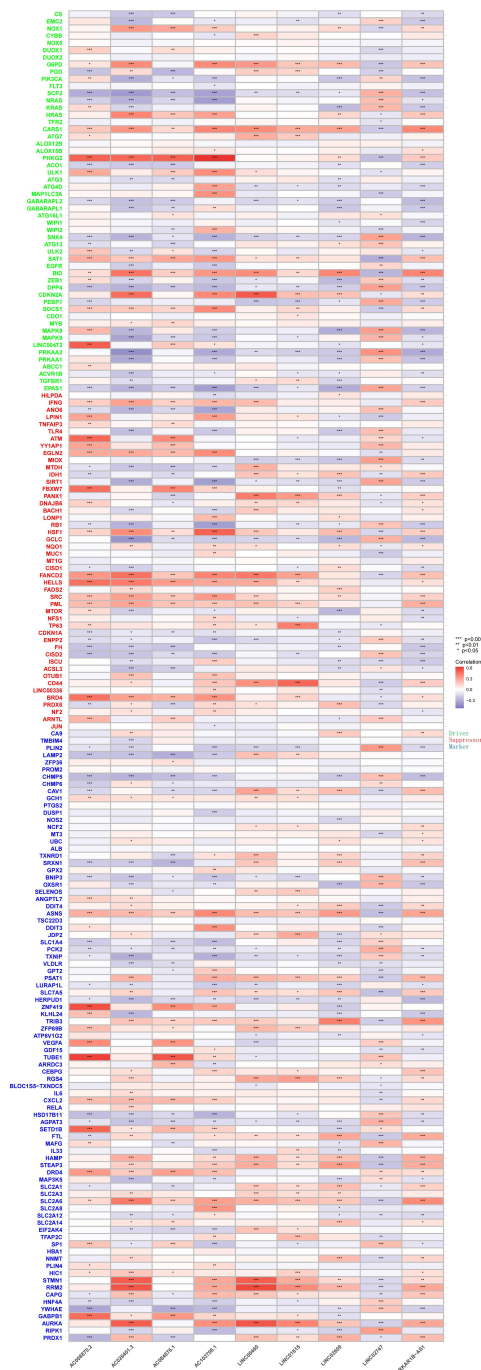

Supplement: f1 [file 6304824.f1.zip]
